# Supplementary material for: Hypoxia controls plasma membrane targeting of polarity proteins by dynamic turnover of PI4P and PI(4,5)P2
Source: eLife. 2022 Jun 9;11:e79582. doi: 10.7554/eLife.79582 (PMC9242647; doi:10.7554/eLife.79582)
Supplement: Figure 1—source data 1. [file elife-79582-fig1-data1.xlsx]

## Sheet: Figure 1A
Figure 1 Souce Data 1
						1	2	3	4	5	6	7	8	9	10	11	12	13	14	15	16	17	18						1	2	3	4	5	6	7	8	9	10	11	12	13	14	15	16	17	18
P4MX2-GFP		PLC-PH-RFP
AVG	STDEV	AVG	STDEV		P4MX2-GFP																							PLC-PH-RFP
t_C2_PM/Cy	t_C2_PM/Cy	t_C1_PM/Cy	t_C1_PM/Cy		min	t_C2_PM/Cy	t_C2_PM/Cy	t_C2_PM/Cy	t_C2_PM/Cy	t_C2_PM/Cy	t_C2_PM/Cy	t_C2_PM/Cy	t_C2_PM/Cy	t_C2_PM/Cy	t_C2_PM/Cy	t_C2_PM/Cy	t_C2_PM/Cy	t_C2_PM/Cy	t_C2_PM/Cy	t_C2_PM/Cy	t_C2_PM/Cy	t_C2_PM/Cy	t_C2_PM/Cy					min	t_C1_PM/Cy	t_C1_PM/Cy	t_C1_PM/Cy	t_C1_PM/Cy	t_C1_PM/Cy	t_C1_PM/Cy	t_C1_PM/Cy	t_C1_PM/Cy	t_C1_PM/Cy	t_C1_PM/Cy	t_C1_PM/Cy	t_C1_PM/Cy	t_C1_PM/Cy	t_C1_PM/Cy	t_C1_PM/Cy	t_C1_PM/Cy	t_C1_PM/Cy	t_C1_PM/Cy
1.01058	0.0564559	1.04161	0.114661		1	1.1255	1.0239	1.0221	1.0361	1.0512	1.0481	0.9545	0.9782	1.0093	0.9874	1.073	1.089	0.9655	0.9574	0.9642	0.9399	0.917	1.0482					1	1.4015	1.009	1.0279	1.063	1.0114	1.0842	0.9609	1.1882	1.0382	0.9375	1.0373	0.9689	1.0782	0.8785	1.0079	0.9538	0.9864	1.1161
0.994317	0.0607958	1.02239	0.0934715		2	1.0332	1.041	0.934	0.9873	1.0188	0.9702	0.9212	1.0796	1.0068	0.9652	1.145	1.0628	0.9512	0.9344	0.9459	1.0132	0.948	0.9399					2	1.2051	0.8864	0.9169	1.0341	0.969	1.0256	0.925	1.2253	1.0963	0.99	0.9778	1.0362	1.0171	1.0258	1.1398	0.936	0.9792	1.0175
0.965717	0.0421759	0.988306	0.0973902		3	0.9665	0.9953	0.9642	0.9116	0.9724	1.0406	0.9231	0.9494	0.9896	0.9732	1.0486	0.9754	0.9116	0.9458	0.9503	1.0234	0.9312	0.9107					3	0.9849	1.0818	0.9947	0.8961	0.8303	1.1372	0.943	1.1152	0.9929	1.0135	1.0624	0.9346	0.9475	0.8829	0.9412	0.8719	0.9693	1.1901
0.943272	0.0451891	0.947261	0.0999745		4	1.0029	0.9499	0.9599	0.9513	0.9267	1.0059	0.9326	0.9438	1.0218	0.9288	0.9349	0.921	0.9181	0.9846	0.9304	0.8755	0.8328	0.958					4	0.8648	0.9257	0.9976	0.8961	0.8497	1.0168	1.0083	0.8602	1.1191	0.9308	0.9818	0.8757	0.9932	0.9255	0.9332	0.8314	0.8349	1.2059
0.92985	0.040114	0.952794	0.0793334		5	0.8655	0.9682	0.9277	0.9049	0.8777	0.9556	0.9561	0.9258	0.9404	0.9085	0.8811	0.9297	0.9452	1.007	0.9513	0.863	0.9486	0.981					5	0.9067	0.9547	0.9355	1.1109	0.8926	0.8123	0.9488	1.0266	0.9835	1.0623	0.8581	0.8425	0.9199	0.9595	0.957	0.9514	0.9506	1.0774
0.952917	0.0569166	0.968094	0.0731062		6	0.9187	0.9514	0.9136	0.8636	0.9743	0.9501	1.0102	1.1108	0.9754	0.9073	0.9449	0.9388	0.9171	0.984	0.9405	0.9055	0.9124	1.0339					6	0.9538	0.9669	0.9646	0.8851	1.0029	0.8638	1.0192	1.0826	1.0042	0.8825	1.0558	0.922	0.9417	0.9289	0.9765	0.9267	0.9077	1.1408
0.981844	0.0451976	0.961044	0.075782		7	1.0103	0.9426	1.0199	0.9937	0.9951	0.8889	0.9937	1.0332	1.0104	0.9757	0.9349	0.9496	0.9531	1.0198	0.9657	1.0505	0.9069	1.0292					7	0.8326	0.8563	1.0416	0.9831	1.0243	0.8344	1.0815	0.8931	0.977	0.9646	0.9873	1.0734	0.9434	1.0053	0.9397	1.0221	0.9031	0.936
0.996011	0.0476573	0.984856	0.0951546		8	1.0209	0.9935	1.0271	1.0329	1.0706	0.8984	0.9696	0.9119	1.0071	0.9811	0.9602	0.9708	0.9433	0.9948	1.0605	1.0439	1.0267	1.0149					8	0.997	1.0654	0.9656	1.0543	1.1362	0.8841	0.9646	0.8452	0.9846	1.038	0.9378	1.1153	0.9604	0.9944	0.9776	1.1307	0.8696	0.8066
1.01674	0.05124	0.960311	0.0732056		9	0.9789	0.9743	1.0463	1.0444	0.9765	1.0108	0.9859	1.0767	1.019	1.0167	0.9567	0.9901	1.0094	1.0366	1.0061	1.1725	1.0442	0.9562					9	0.9357	0.9655	0.9947	1.0285	1.0199	0.98	0.8994	0.8158	0.9623	0.9513	0.8747	0.9645	0.9677	0.8944	1.0359	1.099	1.0457	0.8506
1.00312	0.0413899	0.995111	0.0672669		10	1.002	0.9074	1.0355	1.0257	1.0017	1.0019	0.989	0.9724	0.9999	0.9866	0.9473	1.0287	1.0499	0.9914	0.9719	1.0709	1.0758	0.9982					10	0.9695	0.9168	0.9992	0.9757	1.0368	1.0905	1.0292	0.9354	0.8874	0.9765	0.9078	1.0306	0.9934	1.0266	0.9718	1.1699	1.0224	0.9725
1.04572	0.0582127	1.03762	0.0790659		11	1.0212	1.0055	0.9973	1.0898	1.0599	1.0163	1.0603	0.9626	0.9768	1.0853	1.0046	1.0373	1.2231	1.0243	1.0827	1.0466	1.085	1.0444					11	0.9666	1.0963	0.9928	1.0926	1.1963	1.0257	1.0189	0.9697	0.9778	1.044	1.0284	1.1289	1.0198	1.1609	1.0062	1.0285	1.0676	0.8561
1.09025	0.0621889	1.08446	0.11072		12	1.0552	1.1162	1.0934	1.0891	1.0089	1.1857	1.1708	1.0267	1.0057	1.1694	1.071	1.0737	1.1382	1.0249	1.1045	1.013	1.1939	1.0842					12	1.0266	1.1461	1.1012	0.9601	0.9822	1.245	1.1184	0.9832	0.964	1.1651	1.1461	1.1223	1.1021	1.2507	1.0088	0.992	1.2885	0.9178
1.06963	0.0538359	1.05615	0.0674675		13	0.9992	1.1308	1.0588	1.0694	1.0661	1.0276	1.1332	1.029	1.0378	1.1148	1.0977	1.0329	1.0744	1.0949	1.1259	0.9822	1.1775	1.0012					13	0.9551	1.129	1.0677	1.0204	1.0483	1.0004	1.0829	1.0596	1.0129	1.0439	1.1447	0.985	1.1156	1.0666	1.1044	1.0866	1.175	0.9126
1.07277	0.0464902	1.06217	0.0686375		14	0.9779	1.0988	0.9926	1.1124	1.046	1.0769	1.1272	1.0781	1.0696	1.0891	1.0603	1.1106	1.1138	1.0774	1.1301	0.9968	1.1128	1.0394					14	1.0356	1.2071	1.0581	1.1173	1.0354	1.0624	1.0299	1.0078	1.0802	1.075	1.0606	1.0707	0.9496	1.1691	1.109	0.9586	1.1254	0.9672
1.08646	0.0437431	1.02252	0.0753601		15	1.0038	1.1205	1.0578	1.1324	1.0426	1.0129	1.1024	1.0649	1.0915	1.1045	1.0896	1.0764	1.108	1.0661	1.0952	1.0813	1.1932	1.1132					15	0.8691	1.151	1.0393	1.0551	1.0739	0.9377	1.0682	0.9673	0.924	1.0546	1.0363	1.0282	0.9674	0.9598	1.1066	1.0195	1.1442	1.0032
1.06675	0.0731737	1.01979	0.0966015		16	0.9384	1.0613	1.031	1.257	1.1213	1.0545	1.0252	1.0602	1.0596	1.1078	1.0987	1.024	1.1228	0.9716	1.0395	1.0245	1.174	1.0301					16	0.9305	1.0916	1.0839	0.9796	1.0345	0.8381	1.002	1.0565	1.046	0.9456	1.0662	1.0353	1.0549	1.135	1.0088	1.0059	1.2228	0.8191
1.08533	0.0694753	1.0031	0.0627184		17	1.0209	1.1157	1.1639	1.2748	1.1017	1.0562	1.0009	1.0702	1.0717	1.0752	1.0801	1.1211	1.0813	0.9675	1.0921	1.003	1.1493	1.0903					17	1.0193	0.9716	1.0417	1.0504	0.9167	0.9154	0.9522	1.0157	0.8949	1.0375	0.9682	1.0625	0.9661	1.0967	1.0599	1.0144	1.1093	0.9633
1.08817	0.0591069	1.00257	0.0696474		18	0.9614	1.101	1.1115	1.1804	1.0886	1.135	1.0452	1.1521	1.1075	1.1179	0.9897	1.1058	1.1273	1.0534	1.0235	1.0246	1.1368	1.1254					18	0.9419	1.1307	0.9871	1.119	1.018	0.9826	0.8918	0.9677	0.8875	1.0311	0.9332	1.0382	0.9873	0.9993	0.9706	1.1128	1.0242	1.0232
1.06912	0.0545293	0.940544	0.0527223		19	0.94	1.1027	1.1091	1.1834	1.0873	1.1021	1.0818	1.0183	1.0478	1.0877	1.0027	1.0915	1.1447	1.0447	1.0345	1.0502	1.0509	1.0647					19	0.8568	1.0338	0.9079	0.9984	0.8832	0.9317	0.9233	0.8904	0.9284	0.9528	1.01	0.9988	0.9404	0.9817	0.9633	0.9778	0.8895	0.8616
1.06531	0.0499489	0.931044	0.0790786		20	0.9641	1.0587	0.9999	1.0824	1.0705	1.05	1.0535	1.0801	1.0243	1.0831	1.0592	1.1261	1.18	1.0293	1.1355	1.0783	1.0748	1.0257					20	0.7774	0.9082	1.0051	1.0463	0.9901	0.7853	0.8878	0.8753	0.848	1.0275	0.9405	0.9484	0.9959	1.0208	0.9654	0.9397	0.9258	0.8713
1.08117	0.0778261	0.9162	0.100417		21	0.9245	1.036	1.201	1.1245	1.0946	1.0633	1.0281	1.1405	1.0336	1.0473	1.0543	1.129	1.2138	0.965	1.0581	1.0793	1.2036	1.0645					21	0.7538	0.9313	1.0061	0.9495	0.8637	0.6777	0.8409	0.9251	0.8871	0.9158	0.9802	0.9303	1.0525	0.9762	0.9967	0.996	1.0264	0.7823
1.06839	0.0572851	0.881783	0.096358		22	0.9721	1.0866	1.1819	1.1269	1.081	1.0576	1.0451	1.1102	1.1031	1.1005	0.9901	1.0804	1.1096	0.9468	1.0754	1.0233	1.0809	1.0595					22	0.7331	0.8599	1.0466	0.8892	0.9561	0.6548	0.8379	0.8495	0.8469	0.8948	0.8865	0.9089	1.0648	0.8459	0.9353	0.8535	0.9609	0.8475
1.05411	0.0621363	0.883211	0.0853953		23	0.9459	1.0808	1.1685	1.0888	1.0687	1.07	1.0792	1.1001	1.0908	1.0983	0.9848	1.0307	1.1121	0.9325	1.0232	0.9717	1.086	1.0419					23	0.8316	0.9347	0.857	0.9051	0.9704	0.6869	0.9165	0.8737	0.9073	0.9156	0.8657	0.8938	1.0326	0.8559	0.8999	0.8304	1.0034	0.7173
1.04618	0.0573186	0.8589	0.064682		24	0.9664	1.0074	1.1107	1.045	1.0116	1.0262	1.0054	1.1365	1.0673	1.0545	1.0058	1.0477	1.0899	0.9268	1.0506	1.0228	1.1317	1.125					24	0.7446	0.8096	0.8619	0.8901	0.9193	0.7092	0.8954	0.9037	0.8316	0.9169	0.8507	0.8927	0.8854	0.9038	0.9566	0.8564	0.8609	0.7714
1.05223	0.0626836	0.820689	0.0749926		25	0.924	1.0948	1.11	1.1028	1.0987	0.9826	0.9912	1.1247	1.0437	1.0721	0.9969	1.0339	1.1061	0.9358	1.0475	1.0595	1.1027	1.1132					25	0.6931	0.8321	0.8581	0.7677	0.7761	0.659	0.8379	0.8163	0.7562	0.8724	0.8237	0.8491	0.8316	0.9903	0.8454	0.818	0.9173	0.8281
1.02654	0.0635069	0.803528	0.0637936		26	0.9534	1.0295	1.0407	0.9838	1.0591	0.8922	1.0192	1.07	1.0939	1.0631	0.9992	1.0304	1.1379	0.9343	1.0707	0.9527	1.0926	1.0551					26	0.6894	0.7839	0.8483	0.7219	0.8068	0.6764	0.7452	0.8653	0.7942	0.8224	0.7765	0.8494	0.8517	0.8627	0.8553	0.8217	0.9093	0.7831
1.02526	0.0847682	0.793594	0.0826537		27	0.85	0.976	0.9943	1.0155	1.0171	0.9586	1.0941	1.041	1.0847	1.094	0.986	1.084	1.1016	0.8923	1.0647	0.9175	1.1687	1.1145					27	0.5996	0.9139	0.742	0.7956	0.7905	0.6499	0.7558	0.7553	0.7753	0.8381	0.8273	0.8398	0.7937	0.7533	0.8772	0.9185	0.8816	0.7773
1.01723	0.0789936	0.779222	0.0664621		28	0.8395	0.9611	1.1284	0.9882	1.0428	1.0108	0.9729	1.1271	1.028	1.0358	0.9767	1.068	1.0583	0.9152	1.0514	0.9154	1.1334	1.0572					28	0.6298	0.7337	0.7837	0.7608	0.7848	0.6525	0.7986	0.8233	0.7853	0.8276	0.8284	0.7806	0.7798	0.7436	0.8428	0.8219	0.9136	0.7352
1.0017	0.0662457	0.776922	0.0883892		29	0.8944	1.0414	1.0612	0.9965	1.0247	0.9584	0.9284	1.1147	1.0142	1.0757	0.9535	1.0204	1.0149	0.92	1.0042	0.9029	1.113	0.9921					29	0.6965	0.7801	0.7743	0.6944	0.6868	0.6459	0.7328	0.7398	0.8354	0.852	0.78	0.7879	0.9204	0.8222	0.8487	0.8086	0.9516	0.6272
1.00161	0.0710429	0.754056	0.057376		30	0.8568	0.9651	1.0565	0.9621	1.0251	0.9096	0.9842	1.0882	1.0002	1.1185	0.9808	1.003	1.0233	0.9044	1.0522	0.942	1.0871	1.0699					30	0.6754	0.7345	0.7194	0.6854	0.6948	0.6696	0.7278	0.702	0.7383	0.7636	0.8006	0.8246	0.8127	0.8047	0.8385	0.81	0.8286	0.7425
0.968689	0.0657976	0.738322	0.071846		31	0.8338	0.9778	0.9913	0.9896	0.9764	0.9129	0.8901	0.9397	1.0227	1.0381	0.9198	0.9981	1.0607	0.8707	1.0634	0.9236	1.0092	1.0185					31	0.605	0.7079	0.7313	0.8363	0.6937	0.597	0.7462	0.6675	0.7593	0.7558	0.7319	0.8516	0.7227	0.7434	0.8585	0.7652	0.7937	0.7228
0.948689	0.0600818	0.714394	0.0638604		32	0.8407	0.9279	0.9912	0.9065	0.9877	0.9101	0.8741	1.004	0.9579	1.0023	0.847	0.9703	0.9963	0.9046	1.0673	0.935	0.9657	0.9878					32	0.6269	0.6687	0.7448	0.7469	0.6981	0.5644	0.7091	0.6943	0.7096	0.7216	0.694	0.7148	0.7717	0.75	0.7531	0.6968	0.8804	0.7139
0.895117	0.0580418	0.709556	0.0686015		33	0.797	0.8099	0.9158	0.8904	0.9093	0.7997	0.8725	0.9366	0.896	0.9656	0.8281	0.9227	0.9456	0.8442	0.9725	0.9224	0.9729	0.9109					33	0.5771	0.6932	0.7412	0.6834	0.6506	0.5564	0.6917	0.7235	0.6816	0.7512	0.6993	0.7977	0.7697	0.6822	0.7682	0.7155	0.7822	0.8073
0.884522	0.061555	0.672828	0.0685008		34	0.8012	0.8427	0.9675	0.7908	0.9072	0.7863	0.8569	0.8876	0.9107	0.8898	0.8529	0.9884	0.9839	0.8306	0.9355	0.8737	0.9115	0.9042					34	0.5788	0.6044	0.6222	0.6471	0.6446	0.577	0.6705	0.5884	0.6514	0.7173	0.6674	0.7543	0.7567	0.642	0.7995	0.6952	0.722	0.7721
0.87005	0.0564134	0.656017	0.072453		35	0.7596	0.8227	0.9269	0.871	0.9251	0.8	0.8433	0.8355	0.8946	0.9291	0.8837	0.9415	0.9148	0.7998	0.9423	0.8094	0.9046	0.857					35	0.5037	0.6031	0.631	0.5724	0.6797	0.5765	0.6545	0.6087	0.6411	0.647	0.6533	0.7445	0.7591	0.7406	0.7645	0.6566	0.7452	0.6268
0.848589	0.0532291	0.662233	0.0719293		36	0.754	0.8018	0.9112	0.8413	0.8729	0.8134	0.8274	0.8247	0.8561	0.9108	0.8222	0.8842	0.9329	0.7518	0.934	0.8276	0.8495	0.8588					36	0.5191	0.6291	0.6354	0.6233	0.6519	0.6129	0.6394	0.5504	0.6771	0.6359	0.6587	0.7635	0.7225	0.706	0.7634	0.6612	0.8092	0.6612
0.834344	0.0516987	0.635322	0.0591196		37	0.7294	0.7546	0.8767	0.8108	0.8397	0.8115	0.7949	0.8022	0.8608	0.882	0.8579	0.8892	0.8793	0.7772	0.892	0.7903	0.8709	0.8988					37	0.5515	0.6262	0.6003	0.582	0.5848	0.5305	0.6202	0.5897	0.666	0.6043	0.6782	0.6909	0.6415	0.6951	0.7399	0.6386	0.7376	0.6585
0.812156	0.0582257	0.625483	0.0625494		38	0.6953	0.7506	0.8706	0.7539	0.8123	0.773	0.7613	0.8156	0.8422	0.8788	0.7987	0.8647	0.8532	0.7509	0.9256	0.7857	0.8394	0.847					38	0.5083	0.5582	0.6155	0.57	0.614	0.5428	0.6383	0.5965	0.5838	0.6238	0.6262	0.6782	0.6613	0.7321	0.7011	0.6302	0.7443	0.6341
0.787139	0.050745	0.600572	0.056566		39	0.685	0.7507	0.8028	0.7747	0.7738	0.7166	0.7922	0.7753	0.7876	0.8493	0.7783	0.8729	0.85	0.7444	0.8693	0.7447	0.7879	0.813					39	0.5026	0.5478	0.5872	0.5551	0.5944	0.539	0.5959	0.5425	0.5991	0.5849	0.5822	0.6936	0.6764	0.6255	0.6736	0.6317	0.7011	0.5777
0.775867	0.0450714	0.586511	0.0502677		40	0.7165	0.7393	0.7858	0.7152	0.797	0.7037	0.7733	0.7568	0.7923	0.8544	0.7718	0.8688	0.8175	0.737	0.7882	0.756	0.8054	0.7866					40	0.526	0.55	0.557	0.4975	0.5939	0.4952	0.6167	0.5554	0.6146	0.6106	0.6065	0.6772	0.6216	0.649	0.6348	0.6005	0.5976	0.5531
0.757789	0.0420799	0.584978	0.0550094		41	0.6779	0.7186	0.7855	0.6929	0.7685	0.7331	0.7566	0.731	0.7881	0.7959	0.7694	0.8125	0.7944	0.7098	0.8312	0.7344	0.7839	0.7565					41	0.5124	0.5083	0.5358	0.5059	0.5665	0.4804	0.6293	0.596	0.5812	0.5884	0.6456	0.6541	0.602	0.6365	0.627	0.6232	0.6446	0.5924
0.734961	0.0425017	0.562206	0.0454058		42	0.6685	0.6936	0.7529	0.6821	0.7336	0.6973	0.7472	0.7604	0.7436	0.7501	0.7547	0.8126	0.7811	0.662	0.794	0.7166	0.7641	0.7149					42	0.4917	0.5113	0.5311	0.5349	0.5156	0.5048	0.5916	0.5401	0.5827	0.5309	0.6251	0.6133	0.5985	0.6173	0.6065	0.5565	0.6269	0.5409
0.716061	0.0385026	0.560189	0.0499978		43	0.6551	0.6689	0.7328	0.6467	0.7398	0.691	0.7179	0.7226	0.7495	0.7293	0.7595	0.7695	0.7565	0.6768	0.7501	0.6823	0.7467	0.6941					43	0.4909	0.5196	0.5906	0.4797	0.5222	0.5002	0.593	0.5213	0.5788	0.552	0.6095	0.6463	0.5965	0.5737	0.5785	0.5858	0.6355	0.5093
0.711006	0.0328616	0.550628	0.0418719		44	0.6508	0.6843	0.7082	0.6737	0.7313	0.7027	0.7174	0.7167	0.7427	0.7352	0.7236	0.7543	0.7532	0.6632	0.7461	0.6598	0.7323	0.7026					44	0.5008	0.5343	0.5303	0.4686	0.5362	0.5542	0.601	0.5313	0.5791	0.5501	0.5927	0.6127	0.5795	0.5345	0.5855	0.5376	0.6035	0.4794
0.7058	0.0409797	0.53885	0.0420241		45	0.6444	0.6605	0.7009	0.626	0.7417	0.6722	0.7299	0.6999	0.7303	0.7035	0.7166	0.7685	0.7542	0.6708	0.7652	0.6754	0.7289	0.7155					45	0.4968	0.5254	0.5278	0.4306	0.5406	0.5007	0.5694	0.5173	0.5748	0.5205	0.5686	0.596	0.5702	0.5568	0.5933	0.5209	0.5831	0.5065
0.701206	0.0428988	0.535806	0.0444337		46	0.6335	0.6742	0.7075	0.5992	0.7055	0.6669	0.7231	0.705	0.7159	0.7046	0.7284	0.7471	0.7596	0.6697	0.7406	0.6652	0.7582	0.7175					46	0.4857	0.5106	0.4956	0.446	0.5157	0.5156	0.5785	0.4998	0.5547	0.5155	0.5769	0.5843	0.5869	0.5779	0.547	0.5228	0.6182	0.5128
0.685611	0.0382504	0.537717	0.0558674		47	0.6378	0.6778	0.6964	0.6076	0.6828	0.6477	0.7121	0.6897	0.7071	0.6813	0.7189	0.7426	0.7276	0.6541	0.7012	0.6232	0.7326	0.7005					47	0.4568	0.485	0.4849	0.4396	0.5079	0.4933	0.5955	0.5209	0.5719	0.5157	0.595	0.6142	0.6158	0.5687	0.5513	0.5492	0.6112	0.502
0.682039	0.0425373	0.535517	0.043603		48	0.6338	0.6703	0.6756	0.5867	0.6994	0.6508	0.7118	0.6878	0.7159	0.6707	0.7191	0.7369	0.7232	0.6435	0.7093	0.6115	0.7255	0.7049					48	0.4874	0.5199	0.5049	0.4438	0.5236	0.5021	0.5735	0.5004	0.5688	0.5193	0.5814	0.5946	0.5817	0.5582	0.5579	0.5545	0.5884	0.4789
0.684517	0.0415494	0.530889	0.0542708		49	0.6374	0.6805	0.6746	0.6095	0.6874	0.6635	0.7339	0.687	0.719	0.6556	0.7206	0.7663	0.7227	0.6506	0.7036	0.6169	0.7143	0.6779					49	0.4657	0.5011	0.4935	0.4262	0.5134	0.496	0.577	0.4914	0.576	0.5301	0.5959	0.5869	0.6032	0.5522	0.5568	0.507	0.6153	0.4683
0.67035	0.0411502	0.5303	0.0431376		50	0.6254	0.6704	0.6437	0.5823	0.7129	0.6435	0.7214	0.6714	0.6969	0.6399	0.7042	0.7313	0.7192	0.6477	0.6856	0.6162	0.6932	0.6611					50	0.4906	0.5262	0.4996	0.4387	0.5064	0.4976	0.567	0.5415	0.5472	0.5057	0.5561	0.589	0.5932	0.5417	0.5481	0.4963	0.6061	0.4944
0.668689	0.0438795	0.535639	0.046452		51	0.6246	0.6562	0.6412	0.5783	0.6849	0.6467	0.7119	0.6748	0.6997	0.6332	0.7308	0.7331	0.7156	0.6506	0.6855	0.5961	0.6939	0.6793					51	0.491	0.4948	0.5044	0.4511	0.5312	0.4866	0.5765	0.4989	0.5507	0.4885	0.5874	0.599	0.5941	0.5529	0.5715	0.5344	0.6071	0.5214
0.6633	0.0412713	0.534039	0.0542785		52	0.632	0.6504	0.6602	0.5837	0.6879	0.6335	0.7073	0.6776	0.7003	0.6246	0.6912	0.7237	0.7072	0.6224	0.6869	0.5933	0.7011	0.6561					52	0.4666	0.5107	0.4782	0.4431	0.5165	0.5078	0.6035	0.4881	0.5513	0.512	0.5746	0.5919	0.5917	0.5589	0.5504	0.5128	0.6531	0.5015
0.661056	0.0437734	0.527311	0.0479568		53	0.6184	0.649	0.6562	0.5823	0.6998	0.6348	0.7057	0.6768	0.6982	0.6245	0.6929	0.7191	0.7215	0.6265	0.6837	0.5859	0.6922	0.6315					53	0.4832	0.5037	0.4696	0.4356	0.5113	0.4913	0.5749	0.5327	0.5496	0.5031	0.5597	0.5732	0.5935	0.5389	0.5398	0.484	0.6281	0.5194
0.6579	0.0434039	0.529167	0.0451694		54	0.6247	0.6414	0.6393	0.5838	0.6901	0.6302	0.7057	0.6672	0.7069	0.6381	0.6817	0.7275	0.7065	0.6245	0.6764	0.5791	0.6942	0.6249					54	0.4708	0.4977	0.5184	0.4372	0.5224	0.5005	0.5755	0.5546	0.5374	0.4809	0.5609	0.5687	0.5759	0.5451	0.5538	0.5079	0.6213	0.496
0.653856	0.0418309	0.529333	0.0451514		55	0.6241	0.65	0.6353	0.571	0.6746	0.6424	0.6913	0.6508	0.6896	0.6208	0.6797	0.7184	0.7195	0.6318	0.6799	0.5841	0.6856	0.6205					55	0.4941	0.5347	0.5117	0.4205	0.523	0.5128	0.5623	0.5031	0.5595	0.4852	0.5585	0.6033	0.5639	0.5449	0.5492	0.4988	0.6071	0.4954
0.660267	0.0402801	0.53535	0.053973		56	0.6239	0.6529	0.655	0.5806	0.6911	0.6409	0.7052	0.6885	0.6848	0.6176	0.6754	0.7085	0.7149	0.6383	0.6782	0.5856	0.695	0.6484					56	0.4857	0.4953	0.5015	0.4188	0.5132	0.502	0.5842	0.543	0.5685	0.4945	0.5827	0.5907	0.6043	0.559	0.5847	0.5207	0.6162	0.4713
0.657189	0.0412456	0.527394	0.0463725		57	0.6309	0.671	0.6394	0.5745	0.6902	0.6413	0.7021	0.6832	0.6927	0.62	0.6764	0.7064	0.7092	0.6202	0.662	0.5755	0.6821	0.6523					57	0.4742	0.4976	0.5137	0.4267	0.518	0.5023	0.578	0.5297	0.5472	0.5003	0.5806	0.5879	0.5855	0.5462	0.5156	0.4955	0.6016	0.4925
0.652528	0.0405813	0.534667	0.0529437		58	0.6144	0.6422	0.6462	0.5594	0.6558	0.6316	0.6999	0.6799	0.6777	0.6325	0.6786	0.7024	0.7116	0.6269	0.666	0.5867	0.6893	0.6444					58	0.4696	0.4923	0.4791	0.442	0.5041	0.5305	0.5817	0.5176	0.5595	0.51	0.546	0.6157	0.5892	0.6068	0.5414	0.5073	0.6276	0.5036
0.659222	0.0433054	0.530478	0.0473345		59	0.625	0.6356	0.642	0.5758	0.6762	0.6376	0.6983	0.6752	0.7021	0.6249	0.7032	0.7103	0.7155	0.6334	0.6816	0.5871	0.7097	0.6325					59	0.4722	0.5048	0.4869	0.4503	0.5253	0.4913	0.5881	0.5432	0.5532	0.5177	0.5749	0.5885	0.6062	0.5289	0.5511	0.4949	0.5954	0.4757
0.658206	0.0444256	0.533167	0.0513242		60	0.6237	0.6513	0.6438	0.5686	0.6865	0.641	0.6938	0.6776	0.702	0.6271	0.6939	0.7171	0.7049	0.6372	0.6803	0.5703	0.7017	0.6269					60	0.4988	0.5085	0.478	0.4351	0.5091	0.5197	0.5928	0.5667	0.5477	0.4964	0.5564	0.6082	0.5819	0.5265	0.5512	0.5053	0.6363	0.4784
0.654361	0.0473849	0.526817	0.0512198		61	0.6105	0.6483	0.615	0.5694	0.6809	0.6285	0.7191	0.6772	0.6895	0.6338	0.6966	0.7017	0.7056	0.6366	0.6568	0.5754	0.7224	0.6112					61	0.4721	0.5059	0.4757	0.4258	0.5247	0.4773	0.5647	0.5595	0.5712	0.4893	0.5654	0.6075	0.5851	0.557	0.5644	0.5006	0.5705	0.466
0.633956	0.0503927	0.531333	0.0522346		62	0.5925	0.622	0.6034	0.5367	0.6654	0.6167	0.695	0.6591	0.6737	0.6217	0.688	0.6926	0.7001	0.6148	0.6387	0.5443	0.6688	0.5777					62	0.4845	0.5133	0.4651	0.4158	0.5243	0.4964	0.5799	0.5181	0.5757	0.5164	0.5685	0.6034	0.585	0.5444	0.584	0.5015	0.601	0.4867
0.622522	0.0529052	0.530506	0.0478943		63	0.5706	0.6144	0.5971	0.5262	0.6399	0.596	0.6848	0.6528	0.6737	0.6042	0.6793	0.6969	0.6826	0.6212	0.6239	0.5288	0.6538	0.5592					63	0.5154	0.5023	0.4712	0.4469	0.4931	0.518	0.5706	0.5154	0.5434	0.4971	0.5814	0.6053	0.5928	0.5206	0.5721	0.4949	0.6113	0.4973
0.622078	0.0544814	0.534833	0.0482953		64	0.5601	0.6139	0.5977	0.5165	0.6439	0.6092	0.6803	0.6496	0.6664	0.6001	0.6733	0.6966	0.6913	0.6147	0.6424	0.5247	0.6546	0.5621					64	0.4817	0.5144	0.4792	0.441	0.5068	0.4928	0.5851	0.5128	0.5629	0.5403	0.5881	0.5763	0.6142	0.565	0.5541	0.5116	0.6002	0.5005
0.621572	0.0507276	0.533383	0.0535161		65	0.5626	0.6062	0.5877	0.5274	0.6417	0.6134	0.6865	0.6594	0.6615	0.587	0.6532	0.6699	0.6934	0.6209	0.6347	0.5334	0.6729	0.5765					65	0.476	0.5032	0.4623	0.4385	0.508	0.5097	0.595	0.5393	0.5653	0.5046	0.5789	0.5999	0.5912	0.5504	0.5306	0.5105	0.6408	0.4967
0.616156	0.0512464	0.530517	0.0521127		66	0.5646	0.6018	0.5919	0.5181	0.6348	0.5985	0.6883	0.6358	0.6444	0.5882	0.6504	0.6845	0.6955	0.6026	0.6245	0.5274	0.6613	0.5782					66	0.4734	0.4796	0.4827	0.4306	0.5331	0.5161	0.5833	0.5154	0.5754	0.5207	0.5803	0.6123	0.598	0.5464	0.5591	0.5261	0.5672	0.4496
0.647122	0.052641	0.533061	0.0510084		67	0.6022	0.6218	0.6352	0.5585	0.674	0.628	0.7079	0.6866	0.6658	0.5974	0.7122	0.7008	0.7286	0.6397	0.6381	0.544	0.6903	0.6171					67	0.4882	0.505	0.4917	0.4186	0.5367	0.5081	0.5786	0.551	0.5928	0.4706	0.5762	0.6102	0.5838	0.5525	0.5456	0.5155	0.5844	0.4856
0.616267	0.0474667	0.536361	0.0488813		68	0.5677	0.604	0.5989	0.5207	0.641	0.5972	0.6818	0.6318	0.6403	0.588	0.6541	0.6545	0.7039	0.6009	0.608	0.5279	0.635	0.6371					68	0.4641	0.5337	0.4916	0.4399	0.532	0.5238	0.5971	0.5235	0.5732	0.5137	0.5611	0.6031	0.5704	0.5571	0.5547	0.5115	0.623	0.481
0.621806	0.0483401	0.533572	0.05151		69	0.5694	0.596	0.5915	0.5301	0.6116	0.6264	0.682	0.6369	0.6407	0.5999	0.6662	0.6435	0.7192	0.5982	0.6281	0.538	0.6507	0.6641					69	0.4572	0.5142	0.4855	0.4309	0.5351	0.5222	0.5902	0.5263	0.5486	0.4971	0.5885	0.5968	0.5778	0.555	0.5384	0.5055	0.6329	0.5021
0.621083	0.0438401	0.530767	0.0496165		70	0.5856	0.605	0.5952	0.5226	0.6154	0.6239	0.6601	0.6289	0.6338	0.5963	0.6669	0.6482	0.6874	0.5917	0.6282	0.55	0.6565	0.6838					70	0.4802	0.4994	0.4715	0.4305	0.5199	0.5259	0.5641	0.4817	0.5396	0.5104	0.5808	0.606	0.5965	0.5624	0.5619	0.5096	0.6033	0.5101
0.615017	0.040554	0.527456	0.0428307		71	0.5815	0.5824	0.6059	0.5193	0.6372	0.6111	0.6602	0.6092	0.6406	0.5911	0.6442	0.6424	0.6715	0.6075	0.6209	0.5435	0.6424	0.6594					71	0.4846	0.504	0.4618	0.4384	0.5024	0.498	0.5714	0.5296	0.554	0.5301	0.5683	0.5544	0.5916	0.549	0.5444	0.508	0.5943	0.5099
0.613472	0.0425112	0.531117	0.043878		72	0.5836	0.5924	0.5945	0.5309	0.6241	0.6033	0.6482	0.6231	0.6261	0.57	0.6407	0.6496	0.6684	0.5904	0.6203	0.5371	0.6499	0.6899					72	0.4715	0.5082	0.4991	0.4433	0.5059	0.5206	0.5649	0.5344	0.5325	0.4973	0.5479	0.6038	0.5942	0.5476	0.5415	0.4903	0.5983	0.5588
0.621261	0.0372664	0.532167	0.0437419		73	0.5812	0.6138	0.6096	0.5356	0.6104	0.607	0.6463	0.6396	0.6229	0.5958	0.6394	0.6511	0.6715	0.5866	0.6428	0.5824	0.6635	0.6832					73	0.4979	0.5258	0.4809	0.4352	0.5034	0.5148	0.5862	0.5064	0.5381	0.5074	0.5636	0.5907	0.5917	0.5386	0.547	0.5138	0.6054	0.5321
0.615883	0.0377769	0.531689	0.0458755		74	0.5684	0.5938	0.5964	0.5449	0.6026	0.6018	0.6564	0.6057	0.6413	0.5919	0.6283	0.6376	0.6616	0.576	0.6536	0.5847	0.6633	0.6776					74	0.4769	0.4934	0.4679	0.4454	0.5231	0.5065	0.5748	0.5194	0.5401	0.5098	0.5663	0.622	0.5865	0.532	0.5481	0.5145	0.5856	0.5581
0.631178	0.0446411	0.535294	0.0561955		75	0.5734	0.6289	0.6031	0.5586	0.6153	0.6357	0.6608	0.6149	0.6511	0.5866	0.6253	0.6458	0.6733	0.5857	0.6797	0.621	0.6542	0.7478					75	0.4412	0.4809	0.4786	0.4344	0.5074	0.4926	0.5724	0.5197	0.5516	0.5288	0.586	0.6179	0.6016	0.5513	0.5391	0.5222	0.61	0.5996
0.646283	0.0499153	0.542156	0.0618558		76	0.5972	0.659	0.6294	0.581	0.6238	0.6167	0.6618	0.6286	0.6704	0.6023	0.6334	0.655	0.6849	0.5784	0.6894	0.6608	0.6665	0.7945					76	0.4712	0.4925	0.4689	0.4531	0.51	0.4974	0.5786	0.5256	0.5531	0.5106	0.57	0.5976	0.6043	0.586	0.5173	0.5198	0.6074	0.6954
0.657961	0.0508933	0.553339	0.0730558		77	0.6488	0.6673	0.6364	0.6601	0.6421	0.6459	0.6473	0.6219	0.648	0.6109	0.6256	0.6402	0.6558	0.5824	0.7167	0.7062	0.6675	0.8202					77	0.4825	0.5048	0.452	0.4633	0.5309	0.5018	0.601	0.5379	0.5518	0.5121	0.5632	0.6364	0.618	0.5623	0.5698	0.5148	0.5977	0.7598
0.682094	0.0574522	0.540861	0.0599919		78	0.6376	0.7476	0.6909	0.7115	0.6479	0.6447	0.6651	0.6451	0.6556	0.6355	0.6343	0.6495	0.6878	0.5971	0.7633	0.8179	0.6858	0.7605					78	0.4723	0.4804	0.482	0.432	0.5121	0.4999	0.5825	0.5215	0.5215	0.5233	0.5696	0.6035	0.611	0.5333	0.5587	0.5418	0.6299	0.6602
0.695306	0.0729473	0.553694	0.0642992		79	0.663	0.7358	0.7118	0.7247	0.6647	0.666	0.6656	0.6418	0.6493	0.6433	0.6323	0.6416	0.6788	0.5938	0.7811	0.8575	0.7112	0.8532					79	0.4797	0.5034	0.4679	0.5011	0.5128	0.4967	0.5811	0.5502	0.552	0.4952	0.5746	0.5823	0.5917	0.5691	0.5622	0.5893	0.6171	0.7401
0.730483	0.0923979	0.5565	0.0656414		80	0.7027	0.7573	0.7297	0.8244	0.7048	0.6818	0.6873	0.6678	0.6589	0.6751	0.6564	0.6766	0.7064	0.5962	0.8754	0.9368	0.7162	0.8949					80	0.4694	0.5309	0.4498	0.4734	0.5225	0.5112	0.5858	0.51	0.5527	0.5236	0.5921	0.5821	0.5919	0.5582	0.639	0.6076	0.6035	0.7133
0.807017	0.0766694	0.567628	0.0688454		81	0.8115	0.9096	0.84	0.829	0.788	0.7558	0.7513	0.7683	0.7391	0.7198	0.7681	0.7376	0.7879	0.6994	0.943	0.9691	0.839	0.8698					81	0.5005	0.5521	0.4754	0.4827	0.5336	0.5253	0.5814	0.5034	0.5471	0.5203	0.5665	0.612	0.5851	0.5424	0.647	0.6989	0.6399	0.7037
0.763983	0.104982	0.594256	0.0620462		82	0.8138	0.8617	0.8213	0.8575	0.7921	0.6688	0.6606	0.7011	0.6712	0.7001	0.6637	0.6888	0.6817	0.6332	0.9304	0.9605	0.7409	0.9043					82	0.5217	0.6623	0.542	0.5661	0.5395	0.5441	0.5757	0.5506	0.5199	0.6169	0.5777	0.5793	0.6271	0.5554	0.716	0.702	0.6151	0.6852
0.761294	0.0956125	0.617167	0.0958643		83	0.8028	0.8949	0.7735	0.8893	0.8001	0.6665	0.657	0.7171	0.6603	0.7005	0.7168	0.6578	0.6787	0.6353	0.8772	0.909	0.8099	0.8566					83	0.5405	0.6873	0.5112	0.6112	0.5608	0.5467	0.575	0.543	0.5451	0.608	0.5741	0.6066	0.582	0.5486	0.7468	0.8583	0.6856	0.7782
0.779833	0.106147	0.652461	0.119077		84	0.9081	0.9669	0.7983	0.898	0.8642	0.6683	0.6582	0.7463	0.6847	0.7318	0.7098	0.6639	0.6778	0.6541	0.8144	0.9204	0.7761	0.8957					84	0.6664	0.7155	0.5302	0.6972	0.5406	0.5652	0.5846	0.5624	0.5825	0.6477	0.5726	0.6177	0.5947	0.5495	0.8118	0.9699	0.7053	0.8305
0.78325	0.0964948	0.677328	0.126972		85	0.8942	0.9431	0.7689	0.8297	0.8497	0.6727	0.6633	0.8149	0.6925	0.7064	0.7468	0.6718	0.7143	0.6542	0.8473	0.9424	0.835	0.8513					85	0.7841	0.9085	0.5867	0.6982	0.604	0.5801	0.5724	0.585	0.579	0.6196	0.5889	0.617	0.6135	0.5739	0.7701	0.9984	0.7186	0.7939
0.806272	0.100795	0.693017	0.123599		86	0.9181	0.9336	0.8245	0.8458	0.8781	0.6896	0.6633	0.9161	0.6973	0.7804	0.8146	0.6886	0.7036	0.6405	0.843	0.9227	0.8486	0.9045					86	0.7757	0.834	0.6679	0.7273	0.5917	0.5684	0.5953	0.6585	0.5894	0.7048	0.5853	0.6137	0.6392	0.5856	0.7915	1.0612	0.768	0.7168
0.825178	0.102809	0.722917	0.137318		87	0.9364	0.9578	0.8559	0.8762	0.8998	0.7093	0.6819	0.9479	0.7139	0.8246	0.8288	0.7038	0.7258	0.6395	0.8642	0.9254	0.847	0.915					87	0.7714	0.7872	0.6653	0.8431	0.6441	0.6177	0.5935	0.752	0.634	0.6557	0.6184	0.5833	0.626	0.5921	0.8031	1.0835	0.7944	0.9477
0.822706	0.100115	0.742861	0.139396		88	0.8887	0.9929	0.8175	0.8496	0.8819	0.7329	0.6855	0.9147	0.7113	0.8662	0.8437	0.7363	0.7037	0.6252	0.8733	0.9345	0.9025	0.8483					88	0.8181	0.9744	0.7112	0.8338	0.6815	0.6738	0.591	0.7778	0.6406	0.6509	0.6707	0.5933	0.625	0.5778	0.8023	1.0938	0.8168	0.8387
0.829539	0.103894	0.756828	0.144198		89	0.8984	0.9269	0.8816	0.8223	0.9705	0.724	0.6708	0.9117	0.7175	0.887	0.864	0.7413	0.7097	0.624	0.9037	0.8927	0.9409	0.8447					89	0.8852	0.9096	0.7192	0.7996	0.7664	0.6596	0.5742	0.7217	0.6207	0.624	0.6976	0.5869	0.6886	0.6039	0.8339	1.0861	0.9328	0.9129
0.838172	0.105038	0.75135	0.128151		90	0.9029	0.9964	0.8378	0.8417	0.9731	0.7508	0.6799	0.9432	0.7196	0.9114	0.8476	0.7656	0.7345	0.6196	0.9075	0.8843	0.9145	0.8567					90	0.8335	0.9356	0.8175	0.9124	0.7906	0.6456	0.6029	0.5992	0.6405	0.6904	0.6793	0.6226	0.6533	0.6215	0.7746	1.0095	0.8356	0.8597
0.856289	0.10815	0.80005	0.153807		91	0.9612	0.9803	0.8852	0.8425	0.9662	0.7499	0.6938	0.9532	0.7356	0.9446	0.8405	0.7963	0.732	0.6379	0.8959	0.9132	0.9826	0.9023					91	0.8924	1.0088	0.8836	0.9365	0.7804	0.72	0.6081	0.6917	0.683	0.763	0.6875	0.6217	0.6868	0.5897	0.7851	1.0828	0.9999	0.9799
0.862906	0.111036	0.804033	0.146598		92	0.9108	1.0141	0.8672	0.8477	0.9739	0.7218	0.7105	0.984	0.738	0.9968	0.8572	0.8421	0.7191	0.6558	0.9037	0.9175	0.9601	0.912					92	0.8562	1.0141	0.8628	0.858	0.7573	0.666	0.6243	0.8629	0.6438	0.7574	0.8304	0.6119	0.6838	0.5732	0.8786	1.024	1.0242	0.9437
0.844372	0.108206	0.80565	0.138929		93	0.8645	1.0233	0.8505	0.7878	0.9566	0.7171	0.6986	0.8978	0.7355	0.9432	0.828	0.8597	0.709	0.6525	0.9231	0.8753	1.0033	0.8729					93	0.8937	0.9765	0.8248	0.8918	0.7956	0.6223	0.6215	0.8377	0.6855	0.733	0.7828	0.6593	0.6334	0.6593	0.879	0.9744	1.0124	1.0187
0.862661	0.114217	0.845778	0.159864		94	0.8984	1.0358	0.8119	0.7823	1.0462	0.7711	0.7099	0.9608	0.7499	0.9499	0.852	0.9252	0.7155	0.6708	0.9329	0.8604	0.9992	0.8557					94	0.9199	1.1097	0.8404	0.9153	0.8073	0.6688	0.6674	0.9581	0.71	0.7432	0.8126	0.672	0.6499	0.6405	0.975	1.0226	1.0696	1.0417
0.875972	0.103222	0.859178	0.163295		95	0.9117	1.0319	0.7957	0.8307	0.9713	0.7723	0.7116	0.9748	0.7729	0.9772	0.9444	0.9771	0.7347	0.7374	0.9061	0.8658	0.9948	0.8571					95	0.9529	1.1907	0.8681	0.9611	0.8567	0.6957	0.6824	0.7994	0.6964	0.8304	0.8486	0.7009	0.6741	0.6628	0.9369	1.0772	1.1475	0.8834
0.871739	0.108404	0.8229	0.12355		96	0.8963	0.9501	0.7814	0.8297	0.9901	0.7652	0.7137	1.0316	0.7951	0.9492	0.9608	0.9983	0.7378	0.742	0.8856	0.8014	1.0418	0.8212					96	0.9103	0.8991	0.7771	0.8611	0.8979	0.7019	0.6769	0.8004	0.7373	0.7746	0.8372	0.7238	0.6973	0.6854	0.8226	0.9506	1.1785	0.8802
0.880006	0.113599	0.862333	0.129744		97	0.8289	0.9977	0.8248	0.7856	1.0479	0.7549	0.7407	0.9688	0.7847	0.9827	1.0097	1.0483	0.7649	0.7394	0.8638	0.8332	1.0162	0.8479					97	0.8605	1.039	0.8187	0.9158	0.9389	0.7472	0.6772	0.9232	0.6903	0.866	0.8505	0.7318	0.7236	0.7064	0.9234	1.0338	1.1011	0.9746
0.878667	0.115771	0.872511	0.128665		98	0.8498	0.9938	0.8261	0.7628	0.9908	0.7513	0.7493	0.941	0.7963	0.9186	0.98	1.112	0.7712	0.7484	0.9078	0.7825	1.0691	0.8652					98	0.8567	0.9971	0.783	0.8695	1.0501	0.6922	0.7242	1.0019	0.7405	0.9058	0.8365	0.7827	0.7306	0.777	0.9577	1.0053	1.1416	0.8528
0.890411	0.113757	0.909611	0.14243		99	0.8458	0.9836	0.8176	0.7877	1.0303	0.7661	0.7529	0.9843	0.8165	0.9714	1.137	1.0523	0.7756	0.8364	0.9197	0.785	0.9244	0.8408					99	0.9039	1.0746	0.885	0.8619	1.0524	0.7132	0.7025	1.0352	0.7877	0.9537	0.9768	0.8406	0.7136	0.7598	0.9349	1.0733	1.1972	0.9067
0.901539	0.111337	0.942594	0.161005		100	0.8446	0.9553	0.8325	0.816	1.0844	0.7763	0.7616	1.0094	0.8754	0.9498	1.112	1.0314	0.7888	0.8405	0.884	0.7708	1.018	0.8769					100	1.0029	1.1892	0.8607	0.9672	1.1647	0.7004	0.7098	0.9792	0.8262	1.005	0.974	0.9414	0.7388	0.7172	1.0285	0.9562	1.2365	0.9688
0.895128	0.112356	0.901617	0.117777		101	0.8431	0.8903	0.7984	0.7914	1.0049	0.7947	0.7869	0.985	0.8374	0.9231	1.2024	1.0477	0.8049	0.8992	0.8898	0.7903	0.9759	0.8469					101	0.9313	1.0078	0.8623	0.9394	1.1159	0.7184	0.6936	0.9024	0.7968	0.9332	0.9379	1.0281	0.7235	0.7947	1.0124	0.8766	1.0007	0.9541
0.883817	0.106615	0.922383	0.136448		102	0.8114	0.907	0.7826	0.7331	1.0211	0.8004	0.8232	0.943	0.8328	0.9144	1.1217	1.0225	0.807	0.9243	0.8472	0.7873	1.0198	0.8099					102	0.9432	1.096	0.8122	0.9348	1.178	0.7279	0.7398	0.9432	0.7646	0.951	0.9856	1.0661	0.7299	0.8027	1.0108	0.9107	1.0867	0.9197
0.888728	0.102593	0.933933	0.130066		103	0.8157	0.882	0.8206	0.7502	0.9837	0.8727	0.85	0.924	0.8486	0.9163	1.1287	1.0227	0.8225	1.0039	0.8061	0.7571	0.9907	0.8016					103	1.0181	0.9644	0.8542	0.8948	1.1194	0.7468	0.742	0.8976	0.8082	1.0131	1.1772	1.06	0.7598	0.844	0.9236	1.0167	1.0757	0.8952
0.881172	0.0902468	0.9221	0.115395		104	0.8003	0.8968	0.8179	0.7326	0.9316	0.8741	0.8421	0.8511	0.8595	0.8987	1.1231	1.0017	0.8473	0.9968	0.8574	0.7964	0.9119	0.8218					104	0.9434	0.9843	0.928	0.9092	1.0496	0.7857	0.7466	0.87	0.8411	0.9585	1.0958	1.0851	0.7616	0.7778	0.933	0.9846	1.1008	0.8427
0.886033	0.0926211	0.952322	0.105233		105	0.8288	0.837	0.8371	0.7284	0.9295	0.8304	0.8738	0.8801	0.8835	0.8747	1.1307	1.0068	0.8847	1.0238	0.8463	0.7856	0.9191	0.8483					105	1.0006	0.9638	0.9524	0.9407	1.0161	0.7825	0.7778	0.9302	0.8628	0.9535	1.1282	1.1062	0.7816	0.9487	0.9254	1.1098	1.0187	0.9428
0.898672	0.0881589	0.96895	0.119142		106	0.8366	0.8616	0.8809	0.7234	0.9367	0.8417	0.9154	0.9216	0.8799	0.884	1.1338	0.9907	0.9094	0.9672	0.8214	0.8242	0.9888	0.8588					106	0.9419	1.0503	0.9051	0.9407	1.0338	0.7479	0.8049	0.9299	0.8587	1.0545	1.1821	1.1086	0.8527	1.0222	0.8825	1.096	1.1122	0.9171
0.901811	0.090586	0.944194	0.12596		107	0.8366	0.8453	0.8653	0.7301	0.9513	0.8454	0.9105	0.9761	0.9338	0.8473	1.1677	0.9835	0.906	0.9101	0.8503	0.8421	0.9469	0.8843					107	1.0664	0.9436	0.8422	0.8821	0.9968	0.7634	0.7236	0.7825	0.9093	0.9958	1.1576	1.1404	0.8863	0.9465	0.9153	1.0422	1.106	0.8955
0.88835	0.0779916	0.936667	0.134298		108	0.8153	0.8238	0.875	0.7728	0.8953	0.8007	0.9067	0.9018	0.9001	0.8529	1.0908	0.973	0.8992	0.9744	0.8188	0.818	0.9553	0.9164					108	1.0857	0.9638	0.8159	0.8277	1.0351	0.6889	0.7467	0.7875	0.9038	0.9865	1.1797	1.0933	0.8784	0.9809	0.8632	1.0158	1.0892	0.9179
0.8677	0.0893042	0.931917	0.127563		109	0.7698	0.8155	0.8514	0.7766	0.8794	0.7914	0.937	0.9106	0.9315	0.8603	1.1162	0.9169	0.9306	0.9066	0.7656	0.7623	0.9035	0.7934					109	0.9041	0.8936	0.9068	0.8443	1.0253	0.7964	0.76	0.8391	0.9854	1.0487	1.3047	0.9755	0.8814	0.9624	0.8055	0.9578	1.0493	0.8342
0.878933	0.0771002	0.906483	0.0991613		110	0.7435	0.8554	0.9263	0.8387	0.8962	0.7978	0.9011	0.8776	0.9282	0.8127	1.0609	0.9632	0.9189	0.926	0.8385	0.7833	0.9444	0.8081					110	0.9073	0.9793	0.8891	0.8668	0.9822	0.7886	0.7377	0.8571	0.9034	0.9351	1.0658	1.0875	0.8404	0.861	0.9053	0.8772	1.063	0.7699
0.863711	0.0760269	0.894978	0.117854		111	0.7666	0.8481	0.8854	0.8044	0.8671	0.8045	0.9071	0.8525	0.908	0.821	1.0553	0.9408	0.9376	0.8666	0.7962	0.7552	0.9388	0.7916					111	0.9052	0.9561	0.8896	0.9081	0.8936	0.7269	0.7428	0.7854	0.9325	0.8699	1.2352	0.9371	0.8762	0.8762	0.8302	0.9072	1.0652	0.7722
0.868883	0.0739728	0.899728	0.105884		112	0.7905	0.881	0.8736	0.8056	0.8747	0.8601	0.9594	0.8382	0.9216	0.8181	1.0802	0.8972	0.9093	0.7915	0.8172	0.7629	0.9006	0.8582					112	0.8955	0.8968	0.8653	0.8232	0.9651	0.6911	0.7284	0.7519	0.8924	0.8892	1.0709	0.9659	0.8749	0.9619	0.8824	0.9996	1.0788	0.9618
0.850628	0.0673667	0.884111	0.11184		113	0.7483	0.8337	0.8942	0.7785	0.8374	0.8177	0.9196	0.8771	0.911	0.7921	1.0189	0.9076	0.9037	0.8218	0.842	0.7639	0.8448	0.799					113	0.7989	0.8572	0.9348	0.8064	0.9475	0.6489	0.7673	0.8951	0.9475	0.8825	1.159	0.9642	0.8792	0.8657	0.7974	0.8494	1.0497	0.8633
0.846211	0.0605386	0.894689	0.109496		114	0.7976	0.7984	0.8349	0.7533	0.8141	0.8449	0.9242	0.8488	0.924	0.8202	0.946	0.95	0.8891	0.7968	0.8627	0.7496	0.8511	0.8261					114	0.813	0.8805	0.8704	0.8176	0.8224	0.7598	0.8049	0.8374	0.9379	0.8808	1.2172	0.97	0.8772	0.8748	0.8411	0.9048	1.0952	0.8994
0.857928	0.0726521	0.889589	0.115928		115	0.7682	0.8549	0.8193	0.7574	0.8372	0.8284	0.9211	0.9109	0.9406	0.7997	0.961	0.9762	0.939	0.7693	0.8247	0.7656	0.9134	0.8558					115	0.8242	0.8156	0.8498	0.8659	0.7668	0.7413	0.7385	0.868	1.0039	0.8962	1.1463	0.9379	0.9293	0.8535	0.798	0.8724	1.124	0.981
0.851411	0.0782846	0.881844	0.110902		116	0.7222	0.8301	0.8348	0.7611	0.8221	0.8035	0.9111	0.9173	0.9157	0.8214	1.001	0.9287	0.9345	0.7669	0.8508	0.7624	0.9465	0.7953					116	0.7898	0.7206	0.8912	0.8618	0.9074	0.6734	0.7954	0.887	0.9164	0.856	1.1641	0.889	0.8679	0.8606	0.8366	0.9281	1.0385	0.9894
0.844561	0.0745472	0.87345	0.114956		117	0.7398	0.8365	0.8389	0.7791	0.8118	0.8117	0.9201	0.8468	0.9238	0.7991	1.0062	0.9501	0.8662	0.7729	0.8561	0.7615	0.9213	0.7602					117	0.8099	0.7505	0.9448	0.8685	0.8491	0.7465	0.8259	0.7867	0.8846	0.9339	1.1232	0.801	0.8966	0.8705	0.7761	0.8964	1.1656	0.7923
0.849139	0.0760217	0.878883	0.10448		118	0.7838	0.806	0.8294	0.7455	0.8165	0.786	0.8894	0.8926	0.9073	0.814	1.046	0.9346	0.8726	0.7785	0.8939	0.7847	0.9227	0.781					118	0.8302	0.7648	0.8376	0.7291	0.9049	0.7756	0.8014	0.8173	0.8531	0.9386	1.019	0.8509	0.9102	0.9764	0.8897	0.856	1.1773	0.8878
0.841428	0.0661451	0.871361	0.0853604		119	0.7897	0.8139	0.7679	0.7427	0.803	0.7702	0.8832	0.8606	0.9318	0.8449	0.9651	0.932	0.8337	0.8378	0.8869	0.7883	0.9192	0.7748					119	0.8377	0.7469	0.818	0.8318	0.8694	0.7748	0.8498	0.8057	0.9433	0.9219	1.0196	0.8659	0.8368	0.9377	0.7944	0.9137	1.082	0.8351
0.84885	0.0639694	0.903172	0.0942186		120	0.7835	0.8092	0.7954	0.7885	0.8354	0.8321	0.958	0.8418	0.8666	0.8243	0.9704	0.9935	0.8658	0.8289	0.8474	0.7788	0.8604	0.7993					120	0.8872	0.8143	0.7696	0.858	0.9568	0.8495	0.8937	0.7908	0.9493	0.9747	1.091	0.9366	0.8825	1.0299	0.8192	0.8812	1.0678	0.805
0.840772	0.0486054	0.883772	0.117605		121	0.7866	0.8651	0.8111	0.7445	0.8639	0.7953	0.911	0.8342	0.8863	0.8028	0.8796	0.9308	0.8263	0.8403	0.8276	0.8061	0.9022	0.8202					121	0.8309	0.8361	0.8652	0.809	0.9482	0.694	0.883	0.7337	0.9497	0.9718	1.0085	0.9972	0.7359	1.0353	0.8574	0.836	1.1342	0.7818
0.8436	0.0558223	0.906956	0.102216		122	0.8126	0.8821	0.8391	0.7015	0.8422	0.8009	0.8678	0.8593	0.8692	0.8702	0.9345	0.8644	0.84	0.8326	0.8294	0.7898	0.9535	0.7957					122	0.8326	0.8591	0.8787	0.7764	0.9155	0.7945	0.8741	0.7966	0.9967	1.0831	1.0382	0.9007	0.8557	1.0267	0.8717	0.8367	1.1192	0.869
0.837611	0.0633598	0.8884	0.108069		123	0.7869	0.8302	0.8089	0.7085	0.847	0.7866	0.8921	0.8178	0.876	0.8396	0.9412	0.9257	0.8649	0.8432	0.8267	0.7443	0.9414	0.796					123	0.8368	0.7456	0.8167	0.7796	0.9697	0.7997	0.8879	0.7375	0.9561	1.0605	0.9155	0.9458	0.8784	0.9966	0.8787	0.8442	1.1376	0.8043
0.841161	0.0512491	0.915517	0.0777799		124	0.7877	0.7978	0.8116	0.7151	0.8578	0.7978	0.8934	0.8832	0.8469	0.8785	0.9097	0.8797	0.8637	0.9002	0.8483	0.7996	0.8739	0.796					124	0.89	0.7836	0.9288	0.8385	0.8869	0.8683	0.8821	0.9102	0.9672	1.0278	1.0233	0.902	0.8793	0.9716	0.8664	0.9371	1.0931	0.8231
0.849528	0.0421609	0.930228	0.0793216		125	0.8003	0.8128	0.8554	0.777	0.8649	0.8454	0.8734	0.8812	0.8422	0.8347	0.8952	0.9009	0.8732	0.9064	0.8548	0.7887	0.9004	0.7846					125	0.8923	0.8729	1.0384	0.8403	0.9873	0.9315	0.8154	0.8615	0.9266	0.9797	1.0915	0.9062	0.9094	0.9804	0.8888	0.9076	1.0703	0.844
0.854939	0.0558647	0.89925	0.0979452		126	0.835	0.8627	0.7736	0.7848	0.8608	0.8591	0.8605	0.8502	0.8543	0.82	0.8852	0.936	0.8671	0.9414	0.8813	0.802	0.9602	0.7547					126	0.9269	0.9396	0.8175	0.7727	0.9254	0.966	0.7722	0.7634	0.9753	0.9309	0.958	0.8031	0.8039	1.0746	0.9102	0.9072	1.0898	0.8498
0.853556	0.0472878	0.908572	0.101653		127	0.8139	0.8216	0.7742	0.8172	0.8703	0.8331	0.9016	0.8818	0.855	0.8897	0.8793	0.8718	0.9135	0.8587	0.8854	0.8185	0.927	0.7514					127	0.8722	0.8551	0.8074	0.8474	1.0386	0.8391	0.8696	0.7384	0.9929	1.0534	0.8827	0.8685	0.8905	1.0666	0.85	1.0028	1.0726	0.8065
0.836061	0.0505324	0.904639	0.100381		128	0.8068	0.8375	0.7845	0.807	0.82	0.819	0.8567	0.8237	0.8388	0.849	0.9234	0.9009	0.8464	0.8211	0.8685	0.7898	0.9335	0.7225					128	0.7459	0.8906	0.8443	0.9977	0.8979	0.8385	0.9066	0.7751	0.9454	1.0888	0.9603	0.8561	0.8821	0.9906	0.8131	0.974	1.0932	0.7833
0.837261	0.0513531	0.892978	0.0876017		129	0.7904	0.8175	0.7574	0.772	0.8543	0.7956	0.9066	0.8663	0.8161	0.8643	0.9585	0.8866	0.8505	0.8528	0.8206	0.7941	0.8725	0.7946					129	0.7642	0.8076	0.9153	0.9243	0.9176	0.8046	0.8758	0.8202	0.8224	0.9832	1.025	0.9091	0.7784	0.9863	0.8778	1.03	1.0118	0.82
0.829622	0.0530197	0.890683	0.0738716		130	0.8335	0.889	0.7802	0.753	0.8559	0.77	0.8628	0.8238	0.828	0.8372	0.9022	0.9139	0.859	0.8001	0.8494	0.732	0.8779	0.7653					130	0.8072	0.9029	0.9048	0.8797	1.0153	0.8788	0.8462	0.7897	0.864	0.9511	0.9583	1.0072	0.787	0.9055	0.8809	0.9435	0.9515	0.7587
0.847556	0.0462806	0.865661	0.0918752		131	0.8533	0.8853	0.8101	0.7636	0.848	0.8033	0.9078	0.9041	0.8185	0.8637	0.8706	0.8595	0.9199	0.8545	0.8669	0.7876	0.8703	0.769					131	0.7606	0.7313	0.8491	0.7672	1.0188	0.8471	0.8718	0.7098	0.9409	0.9363	0.9659	0.9253	0.8078	0.9315	0.8531	0.9924	0.8933	0.7797
0.862339	0.0623134	0.891567	0.0854305		132	0.8417	0.8774	0.7917	0.7447	0.843	0.7808	0.89	0.9544	0.8737	0.8958	0.9095	0.9404	0.9728	0.834	0.8846	0.8125	0.8793	0.7958					132	0.7846	0.8417	0.8039	0.7999	0.9989	0.8051	0.8649	0.7989	0.9644	1.0047	0.9894	0.9762	0.8205	0.9292	0.9589	1.0083	0.8863	0.8124
0.863589	0.0666305	0.905344	0.0860079		133	0.8272	0.9027	0.7895	0.7305	0.8991	0.8002	0.8983	0.9342	0.905	0.8374	0.9288	0.9495	0.9714	0.811	0.8578	0.8893	0.8401	0.7726					133	0.8919	0.9145	0.8183	0.7976	0.9998	0.848	0.9794	0.7189	0.8685	0.9865	0.9928	1.0547	0.9001	0.8989	0.9975	0.9053	0.8194	0.9041
0.867406	0.0826102	0.892217	0.0584176		134	0.8306	0.8183	0.8044	0.763	0.879	0.8401	0.8628	0.9313	0.841	0.8257	0.9745	1.0015	1.0637	0.8427	0.9223	0.7667	0.8689	0.7768					134	0.8601	0.7855	0.8445	0.8361	0.9266	0.8742	0.8641	0.843	0.8482	0.9487	0.9999	0.9625	0.9366	0.9414	0.9282	0.8959	0.945	0.8194
0.84115	0.0713102	0.9045	0.0678825		135	0.7877	0.7708	0.8069	0.7239	0.8202	0.823	0.8717	0.9405	0.8186	0.8413	0.8818	0.9082	1.009	0.8494	0.8906	0.7909	0.8716	0.7346					135	0.8873	0.8563	0.9049	0.8072	0.8909	0.87	0.8629	0.7955	0.95	1.0049	0.9259	1.0377	0.9698	0.9946	0.8709	0.9011	0.929	0.8221
0.851122	0.0791187	0.921433	0.0944224		136	0.8139	0.822	0.7976	0.6972	0.812	0.801	0.9226	0.9205	0.8121	0.8439	0.9668	0.8874	1.0168	0.848	0.8676	0.8269	0.9277	0.7362					136	0.8622	0.9225	0.7921	0.786	0.8864	0.7743	0.9569	0.9129	0.8991	0.9656	1.058	1.0536	1.1237	0.9502	0.9202	0.9229	0.9609	0.8383
0.8594	0.0793967	0.897111	0.112035		137	0.8071	0.8423	0.786	0.7497	0.8415	0.8282	0.9595	0.9393	0.8368	0.8662	0.9475	0.8752	1.0587	0.8717	0.8558	0.8226	0.8603	0.7208					137	0.8284	0.9187	0.8463	0.809	0.7846	0.7058	0.958	0.863	0.8983	0.8947	0.9759	1.1781	1.0774	0.9023	0.8989	0.9551	0.9066	0.7469
0.859711	0.0750158	0.881444	0.105023		138	0.8023	0.8902	0.8712	0.8091	0.8135	0.7865	0.9811	0.871	0.8297	0.8661	0.9618	0.9113	1.0354	0.8166	0.8561	0.7774	0.8486	0.7469					138	0.8718	0.8579	0.8541	0.8845	0.8051	0.7143	0.9505	0.7639	0.8694	0.8907	0.9813	1.0589	1.1007	0.8627	0.8508	0.9351	0.9271	0.6872
0.855489	0.0771907	0.874361	0.116583		139	0.7683	0.9119	0.8519	0.752	0.7911	0.8152	0.9419	0.9333	0.8496	0.8559	0.9717	0.8663	1.0252	0.8453	0.8598	0.7659	0.8354	0.7581					139	0.9005	0.7964	0.843	0.8555	0.8117	0.746	0.9678	0.6491	0.7996	0.9006	1.1004	0.9829	1.0788	0.849	0.8937	0.9734	0.8611	0.729
0.863656	0.0753351	0.887956	0.10075		140	0.7936	0.9817	0.9068	0.7976	0.8324	0.766	0.9148	0.8727	0.8049	0.8435	0.9827	0.8625	1.0338	0.8662	0.8594	0.7951	0.8474	0.7847					140	0.8731	0.8459	0.8279	0.7977	0.9337	0.7639	0.9158	0.8313	0.855	0.8763	1.0812	1	1.1441	0.8818	0.8331	0.8908	0.8756	0.756
0.841433	0.0918264	0.947261	0.113783		141	0.7524	0.9811	0.8779	0.7427	0.7633	0.7631	0.878	0.9	0.7883	0.8408	0.979	0.8134	1.0686	0.8116	0.8318	0.7873	0.822	0.7445					141	0.8601	0.8639	0.9095	0.7973	0.9042	0.801	0.9676	0.9675	0.9726	0.9599	1.1632	1.0887	1.2165	0.9741	0.8692	0.9742	0.9052	0.856
0.876806	0.0809588	0.898289	0.106786		142	0.7697	0.9866	0.9107	0.7448	0.821	0.8282	0.8934	0.9706	0.8283	0.8408	1.0021	0.8838	1.0387	0.9104	0.8575	0.8288	0.862	0.8051					142	0.805	0.8461	0.8069	0.7915	0.8482	0.7572	0.9495	0.8607	0.8962	0.9181	1.0856	0.9638	1.1552	0.9201	0.8756	1.0082	0.9139	0.7674
0.819	0.0735604	0.920106	0.123939		143	0.7226	0.8898	0.8413	0.7382	0.7692	0.7346	0.7723	0.8199	0.7892	0.8056	0.9852	0.817	0.9662	0.8534	0.8318	0.7833	0.8649	0.7575					143	0.9185	0.8864	0.8148	0.8633	0.8879	0.7322	0.8649	0.9407	0.8516	0.9508	1.1943	0.9702	1.2073	0.8777	0.8442	1.0455	0.921	0.7906
0.852072	0.0757904	0.903078	0.117929		144	0.7334	0.8907	0.877	0.7702	0.809	0.8308	0.8446	0.8988	0.8109	0.8712	0.9386	0.9006	1.0139	0.8611	0.8454	0.7626	0.948	0.7305					144	0.8411	0.9067	0.747	0.9147	0.8772	0.8546	0.9029	0.9976	0.8405	0.912	1.1497	0.9073	1.2065	0.845	0.8267	0.8442	0.9378	0.7439
0.838039	0.0711328	0.908011	0.0903696		145	0.7676	0.9092	0.8581	0.7584	0.8467	0.8109	0.8547	0.8685	0.8034	0.8084	0.9268	0.8852	0.9786	0.8512	0.7861	0.7175	0.9206	0.7328					145	0.8407	0.933	0.8852	0.8689	0.9928	0.8053	0.9389	0.8757	0.8986	0.9517	1.1391	0.9283	1.0231	0.9667	0.8272	0.7554	0.9033	0.8103
0.841944	0.0776632	0.877756	0.0991509		146	0.723	0.8943	0.8943	0.7602	0.8088	0.8369	0.8835	0.89	0.8022	0.7951	0.9487	0.9436	0.9407	0.8807	0.811	0.755	0.8962	0.6908					146	0.8192	0.8701	0.7929	0.8449	0.8511	0.8473	0.9321	0.8496	0.8488	0.9259	1.0734	0.9671	1.0481	0.9044	0.9062	0.798	0.8945	0.626
0.848961	0.0794408	0.877833	0.114612		147	0.7404	0.9256	0.905	0.812	0.7887	0.7849	0.8478	0.8893	0.8314	0.8069	0.9699	0.8851	0.9187	0.9457	0.8166	0.76	0.9562	0.6971					147	0.7978	0.9028	0.8298	0.8854	0.8544	0.7491	0.9168	0.7965	0.8857	0.8544	1.1426	0.9798	1.0584	0.9768	0.8568	0.874	0.8061	0.6338
0.865617	0.0854418	0.898639	0.127235		148	0.725	0.9611	0.9224	0.8094	0.8258	0.8291	0.907	0.7929	0.8536	0.8453	1.0052	0.9327	1.0173	0.9207	0.8654	0.7324	0.8728	0.763					148	0.7549	0.9194	0.8407	0.8776	0.8295	0.7504	0.9064	0.8658	0.7958	0.9686	1.2065	0.903	1.0703	1.1311	0.8842	0.8456	0.8867	0.739
0.852089	0.0736937	0.8981	0.107392		149	0.7606	0.9122	0.8406	0.7803	0.8481	0.8212	0.8661	0.8091	0.8406	0.858	0.9732	0.9669	0.9706	0.8891	0.838	0.7253	0.89	0.7477					149	0.839	0.9311	0.7568	0.9305	0.8948	0.803	0.8742	0.8192	0.8853	1.0178	1.1685	0.9951	0.9869	1.0207	0.7841	0.8393	0.8459	0.7736
0.845094	0.076806	0.880356	0.115439		150	0.7406	0.922	0.8366	0.7491	0.8551	0.8006	0.8516	0.8063	0.8621	0.8847	0.965	0.9471	0.9989	0.8442	0.8313	0.7595	0.8224	0.7346					150	0.8381	0.8038	0.6954	0.8463	0.9496	0.7912	0.842	0.8812	0.8926	1.0131	1.0495	0.9284	1.143	0.9214	0.8917	0.8766	0.8158	0.6667
