# Supplementary material for: Hypoxia controls plasma membrane targeting of polarity proteins by dynamic turnover of PI4P and PI(4,5)P2
Source: eLife. 2022 Jun 9;11:e79582. doi: 10.7554/eLife.79582 (PMC9242647; doi:10.7554/eLife.79582)
Supplement: Figure 1—source data 2. [file elife-79582-fig1-data2.xlsx]

## Sheet: Figure 1B
Figure 1 Souce Data 2
						1	2	3	4	5	6	7	8	9	10	11	12	13	14	15	16	17	18	19	20			1	2	3	4	5	6	7	8	9	10	11	12	13	14	15	16	17	18	19	20
PLC-PH-GFP		Lgl-Cherry			PLC-PH-GFP
AVG	STDEV	AVG	STDEV																								Lgl-Cherry
C1_PM/Cy	C1_PM/Cy	C2_PM/Cy	C2_PM/Cy		min	C1_PM/Cy	C1_PM/Cy	C1_PM/Cy	C1_PM/Cy	C1_PM/Cy	C1_PM/Cy	C1_PM/Cy	C1_PM/Cy	C1_PM/Cy	C1_PM/Cy	C1_PM/Cy	C1_PM/Cy	C1_PM/Cy	C1_PM/Cy	C1_PM/Cy	C1_PM/Cy	C1_PM/Cy	C1_PM/Cy	C1_PM/Cy	C1_PM/Cy		min	C2_PM/Cy	C2_PM/Cy	C2_PM/Cy	C2_PM/Cy	C2_PM/Cy	C2_PM/Cy	C2_PM/Cy	C2_PM/Cy	C2_PM/Cy	C2_PM/Cy	C2_PM/Cy	C2_PM/Cy	C2_PM/Cy	C2_PM/Cy	C2_PM/Cy	C2_PM/Cy	C2_PM/Cy	C2_PM/Cy	C2_PM/Cy	C2_PM/Cy
1.89618	0.234607	6.77849	0.640293		1	2.046	1.6144	1.8652	1.903	2.0849	1.9153	1.711	1.5766	1.5913	1.9071	2.04	1.4657	2.312	2.034	2.3	2.1389	1.738	1.9678	1.7462	1.9663		1	6.7921	7.0028	7.0633	6.3222	6.338	7.0993	6.8592	5.8925	6.4487	6.8518	6.9017	4.9136	6.7148	7.6027	7.1558	7.6019	7.3762	7.4399	7.0379	6.1553
2.00142	0.206598	6.05316	0.554792		2	2.2532	1.7753	1.8149	1.911	2.052	1.9999	1.7575	1.9776	1.7568	2.0124	2.1337	1.6082	2.4282	2.1274	2.1475	2.2911	1.9091	2.0379	1.8671	2.1676		2	6.5001	6.4737	5.744	5.6622	5.9129	6.4805	6.1332	6.1554	5.881	6.1319	6.2871	3.983	5.936	6.17	6.0466	6.6804	6.4684	6.19	6.0481	6.1786
2.0147	0.223687	5.82499	0.494253		3	2.1876	1.7299	1.8169	2.1145	2.0175	2.2343	1.6733	1.6674	1.8628	2.1199	2.0127	1.7542	2.3241	2.4525	2.1242	2.2371	1.8157	2.0497	2.1241	1.9755		3	5.6825	5.9335	5.6607	5.6422	5.4098	5.6833	5.8715	6.0818	5.8678	6.1898	6.6883	4.3387	6.2677	6.3479	5.4659	5.6116	5.8966	5.5247	6.5031	5.8324
2.03629	0.234161	5.6701	0.582618		4	2.1687	1.7947	1.5755	2.0099	2.0785	2.3147	1.7379	1.7719	2.153	2.0471	2.1861	1.7416	2.4493	2.2857	2.3053	2.1934	1.8742	1.867	2.1171	2.0542		4	6.0015	6.0401	5.1543	5.4372	4.817	5.5785	5.987	5.0254	5.4533	5.8874	6.2885	4.7084	6.4932	6.4178	5.4571	5.0998	5.4555	5.2076	6.7262	6.1663
2.07876	0.298399	5.78016	0.719867		5	2.517	2.1071	1.5888	2.3128	2.3335	2.4318	1.7358	1.9599	1.941	2.0607	2.5761	1.6251	2.5667	2.1296	2.1283	1.9865	1.791	1.9973	1.9064	1.8798		5	6.6863	7.6132	6.1423	5.861	5.4124	6.0712	5.3247	5.2035	5.4033	5.5327	5.7956	4.1329	6.1141	5.6566	5.0928	5.7812	6.1186	6.5895	5.9611	5.1103
1.95828	0.289007	5.86965	0.660205		6	2.3588	1.8488	1.4936	2.0142	2.1643	2.336	1.7274	1.8156	1.7347	1.8388	2.0717	1.5799	2.6287	2.051	1.9488	2.3306	1.7203	1.778	1.9399	1.7845		6	6.8639	7.0059	5.3369	5.6976	4.7602	5.6062	5.3745	5.8573	5.6578	6.3774	6.6724	4.5721	6.0442	6.0945	5.3157	6.8869	5.7039	5.725	5.7862	6.0544
2.0451	0.288363	5.77196	0.620428		7	2.4075	1.8955	1.7372	1.7995	1.7544	2.2605	1.7846	1.8874	2.092	1.8771	2.1393	1.5991	2.6555	2.5655	2.3909	2.0669	1.8363	2.0259	2.0872	2.0398		7	6.3474	5.7962	5.0528	5.7122	5.7875	6.6171	6.4086	5.7214	6.0049	6.0795	5.6688	4.1309	5.8937	5.7749	5.169	5.4522	7.0153	6.0956	5.2915	5.4196
1.93773	0.225751	5.63943	0.643886		8	2.1373	2.0279	1.7353	1.8998	1.8645	2.0944	1.7111	1.817	1.7444	1.8208	2.3176	1.5257	2.337	2.2274	2.1726	2.0614	1.7702	1.9769	1.8199	1.6934		8	5.8866	6.5825	5.3087	5.5464	4.6714	6.333	6.012	5.3883	5.2416	5.7875	5.6053	3.8182	5.9968	6.1672	5.6239	6.3395	5.4643	6.1177	5.9293	4.9683
1.91976	0.213734	5.67183	0.548006		9	1.904	2.0244	1.6347	1.7401	2.0198	2.1285	1.7182	1.8484	1.9505	1.865	2.1151	1.644	2.2235	2.1133	2.2925	2.253	1.7422	1.727	1.6945	1.7565		9	6.1484	5.9636	5.255	5.4212	5.6631	6.0862	5.4126	5.5488	5.2853	5.9963	5.8949	4.3186	6.5796	6.4046	5.308	6.4259	5.3888	5.4627	5.9217	4.9514
1.8845	0.180227	5.31191	0.455545		10	2.0542	1.8438	1.9451	1.8954	2.1009	1.9423	1.5041	1.8554	1.7702	1.8361	1.9096	1.4864	2.0971	2.0945	2.0131	2.1429	1.7864	1.758	1.7645	1.89		10	5.3854	5.7304	5.0937	5.2894	4.9178	5.3339	5.2035	5.2696	5.2579	5.7916	5.5315	3.8573	5.1949	6.1259	5.1571	5.6275	5.3567	5.5878	5.6272	4.8991
1.86523	0.190854	5.30623	0.405516		11	1.9232	1.9004	1.8208	1.8652	2.0839	1.8406	1.5552	1.7601	1.8224	1.9027	1.9415	1.3015	2.1311	1.9833	2.0339	1.8448	1.7987	1.9484	1.7345	2.1125		11	5.8894	5.611	5.5507	5.2742	4.9296	5.4896	5.3351	4.9669	5.4527	5.1609	5.1229	4.07	5.1688	5.091	5.7227	5.4327	5.7459	5.6763	5.4759	4.9583
1.77996	0.174696	5.27414	0.582004		12	1.7386	2.1013	1.7682	1.509	1.681	1.8174	1.6336	1.6183	1.609	1.8183	1.7626	1.5034	2.1385	1.8694	1.9649	1.7928	1.8194	1.7206	2.015	1.7179		12	5.626	6.6001	5.338	4.7405	4.8934	5.7063	5.2614	4.997	5.26	5.2589	5.6419	3.4477	5.2504	5.7307	5.0473	5.4591	5.4372	5.2514	5.4451	5.0904
1.72599	0.170855	5.06743	0.39499		13	1.7665	1.7177	1.7742	1.6166	1.897	1.7036	1.516	1.5798	1.5802	1.6905	1.7718	1.244	2.0502	1.8637	1.7918	1.7958	1.7553	1.8176	1.6618	1.9256		13	4.8477	5.4223	5.0111	4.8641	4.5375	4.9925	5.4764	5.0743	5.0817	5.4758	5.4321	3.8253	5.5636	5.3169	5.0917	5.1559	5.2632	5.0664	5.0883	4.7618
1.68905	0.138378	5.01587	0.467403		14	1.6485	1.8559	1.586	1.5057	1.4916	1.8144	1.5537	1.6177	1.7078	1.6061	1.6556	1.5295	2.0225	1.8629	1.7852	1.7917	1.7355	1.5757	1.731	1.7041		14	5.1041	5.7369	5.0967	4.7115	4.3601	4.9785	5.4517	5.2179	4.7089	5.2462	4.8206	3.7329	5.5815	5.3042	4.8444	5.4241	5.4293	5.1257	4.9141	4.5281
1.59934	0.15691	4.87165	0.48868		15	1.6628	1.5253	1.5754	1.542	1.3895	1.6551	1.3218	1.5575	1.6751	1.6505	1.5937	1.3056	1.8727	1.83	1.5952	1.7311	1.8051	1.4932	1.7347	1.4705		15	5.1599	5.0452	4.9857	4.5156	4.1885	5.1394	4.9001	4.7536	4.6988	5.7097	4.9417	3.6532	5.0366	5.3336	4.4859	5.2772	5.1459	4.7446	5.5162	4.2017
1.59198	0.140167	4.85971	0.374819		16	1.5634	1.8147	1.5703	1.522	1.4979	1.5078	1.5813	1.3689	1.3952	1.5794	1.5953	1.4412	1.9708	1.6757	1.7328	1.5867	1.6737	1.5061	1.667	1.5894		16	5.0756	5.3527	5.0278	4.7247	4.9734	5.2344	5.2521	4.6971	4.621	5.4159	4.6127	3.9819	4.8936	4.4342	4.5583	4.762	5.2267	4.8701	5.1616	4.3184
1.52314	0.130657	4.65095	0.425599		17	1.6475	1.7037	1.4791	1.4894	1.4486	1.5477	1.48	1.5913	1.5135	1.5523	1.5326	1.235	1.7254	1.4748	1.5818	1.6305	1.6185	1.2191	1.4086	1.5833		17	5.1815	5.3571	4.6791	4.3589	3.9903	5.1431	4.7591	4.6166	4.2424	4.9076	4.5255	3.661	4.8266	4.7524	4.6272	4.9519	4.8191	4.4573	5.0541	4.1081
1.49727	0.138878	4.57723	0.484177		18	1.4339	1.7445	1.4962	1.4132	1.3055	1.6285	1.4411	1.4563	1.3887	1.4745	1.4269	1.1864	1.5834	1.7076	1.5946	1.6657	1.6195	1.3807	1.5408	1.4573		18	4.5407	5.5283	4.3159	4.6807	3.8197	4.8482	4.5483	4.9058	4.336	4.8506	4.3928	3.0896	4.828	4.6385	4.8966	4.7309	4.8046	4.6645	4.764	4.361
1.47529	0.138029	4.57626	0.326877		19	1.4795	1.656	1.3981	1.3932	1.4702	1.5024	1.3191	1.54	1.4547	1.4451	1.3727	1.1913	1.7854	1.5714	1.3365	1.6173	1.6477	1.3579	1.5397	1.4276		19	4.6418	4.7925	4.562	4.7363	4.2518	4.9906	4.8157	4.6812	4.3259	4.7788	4.3342	3.5753	4.9302	4.6711	4.4067	4.7541	4.5162	4.3924	4.9911	4.3773
1.45572	0.138181	4.50257	0.402487		20	1.5351	1.5824	1.4663	1.2695	1.3507	1.3875	1.3986	1.5532	1.3197	1.41	1.4807	1.168	1.7014	1.6432	1.6435	1.3194	1.5957	1.4391	1.4577	1.3927		20	4.7894	4.8486	4.5222	4.2064	4.078	4.686	4.9299	4.853	4.0074	5	4.4657	3.5603	4.6695	4.6675	4.4302	4.2283	4.5922	4.7409	4.9624	3.8135
1.41046	0.114443	4.54034	0.384264		21	1.3129	1.5643	1.2827	1.4558	1.2225	1.3994	1.4175	1.4594	1.3403	1.4393	1.307	1.1579	1.6153	1.477	1.4647	1.4787	1.547	1.429	1.3644	1.4741		21	4.7046	4.7402	4.6021	4.574	3.9866	4.6913	4.7595	4.8164	4.181	4.9308	4.3105	3.3226	4.6037	4.5028	4.7727	4.5073	4.5456	4.9116	5.0107	4.3328
1.37062	0.13868	4.35906	0.383604		22	1.4273	1.4566	1.3534	1.278	1.1402	1.3287	1.1826	1.383	1.4935	1.4128	1.3446	1.1325	1.6227	1.3921	1.5083	1.5519	1.5508	1.2118	1.3586	1.2831		22	4.3543	4.8206	4.3109	4.6706	3.7494	4.3519	4.5381	4.4403	4.3383	5.0718	4.27	3.3714	4.283	4.7351	4.2736	4.1539	4.0949	4.4658	4.8239	4.0634
1.36063	0.133486	4.36667	0.468731		23	1.3888	1.4751	1.3075	1.2294	1.2548	1.3863	1.2366	1.3188	1.1993	1.4873	1.2918	1.0762	1.5423	1.4336	1.5491	1.3876	1.6233	1.3222	1.388	1.3147		23	4.4079	5.0626	4.3558	4.3474	3.6395	5.0188	4.3723	4.4635	3.8958	5.0138	4.2871	3.1713	4.4511	4.6468	4.1508	4.6046	4.3086	4.2755	4.8993	3.961
1.33346	0.121593	4.29323	0.343506		24	1.4744	1.4436	1.4984	1.2966	1.198	1.401	1.2884	1.3434	1.2522	1.4311	1.2734	1.0985	1.4497	1.4843	1.2433	1.4046	1.4264	1.1396	1.3455	1.1768		24	4.3489	4.4049	4.2164	4.3704	3.946	4.5518	4.6011	4.2492	4.1153	4.9063	4.3974	3.5241	4.223	4.4309	4.0582	4.3517	3.9821	4.4256	4.9757	3.7855
1.33579	0.103652	4.3019	0.379936		25	1.3532	1.4406	1.192	1.299	1.1413	1.4158	1.3326	1.3175	1.2846	1.4158	1.2545	1.2035	1.5083	1.4357	1.2829	1.4288	1.4795	1.2102	1.4065	1.3135		25	4.2583	4.4587	4.2139	4.3178	3.7121	4.406	4.6109	4.7569	3.7916	5.023	4.0818	3.5815	4.2343	4.3038	4.1895	4.3871	4.2067	4.606	4.9638	3.9344
1.3242	0.105775	4.16449	0.378626		26	1.387	1.3892	1.1879	1.1953	1.2519	1.3725	1.282	1.2974	1.312	1.3791	1.2627	1.173	1.5305	1.2849	1.3955	1.5271	1.4245	1.167	1.3775	1.287		26	4.255	4.6267	4.1296	4.1552	3.4416	4.188	4.2713	4.3626	3.9295	4.7282	4.2277	3.6179	4.2318	4.1182	3.8372	3.8869	4.0647	4.3529	5.0924	3.7723
1.33485	0.0975882	4.18274	0.341691		27	1.3506	1.4589	1.2829	1.3181	1.1723	1.2305	1.2668	1.3461	1.2884	1.4668	1.3012	1.21	1.5447	1.296	1.3567	1.4949	1.3008	1.3055	1.4224	1.2834		27	4.1098	4.5326	3.9482	4.1894	3.6338	4.2821	4.2377	4.6189	4.0264	4.6449	3.9701	3.6802	4.3605	4.679	3.7573	4.26	3.8347	4.3919	4.6711	3.8263
1.29671	0.102905	4.14745	0.340663		28	1.2249	1.3156	1.3893	1.2613	1.2319	1.1992	1.3629	1.2363	1.2755	1.4236	1.1658	1.1621	1.4278	1.3603	1.3364	1.5039	1.3976	1.1083	1.2724	1.279		28	4.2508	4.3193	4.1111	4.4043	3.5067	4.2317	4.2654	4.4135	4.0136	4.9292	3.957	3.6854	4.1726	4.2991	4.0972	3.7942	4.0612	4.0508	4.7147	3.6712
1.26629	0.0970438	4.08559	0.297762		29	1.1687	1.2849	1.2591	1.1188	1.3818	1.1914	1.2401	1.3284	1.3452	1.3894	1.1858	1.1094	1.4682	1.2374	1.349	1.2914	1.3104	1.1283	1.2445	1.2937		29	4.0096	4.5506	4.0132	4.2058	3.6741	4.0128	4.2112	4.4903	4.0197	4.6217	4.1009	3.5901	4.3213	4.3485	4.0157	3.8385	3.6386	3.9094	4.3241	3.8157
1.24367	0.084749	4.11678	0.368614		30	1.2424	1.2919	1.0498	1.1985	1.2187	1.3493	1.2081	1.3474	1.2547	1.2685	1.2027	1.1293	1.4124	1.2094	1.2161	1.3043	1.1704	1.1706	1.3	1.3288		30	3.9512	4.3884	3.7843	4.58	3.5911	4.32	4.2549	4.427	3.8566	4.8623	3.9843	3.5494	4.026	4.3674	3.7845	3.9918	3.6531	4.3848	4.6179	3.9606
1.23588	0.079558	4.09995	0.369324		31	1.1388	1.3207	1.2172	1.1707	1.1757	1.1755	1.2001	1.2038	1.3016	1.2625	1.2805	1.0374	1.2701	1.26	1.3077	1.4053	1.3048	1.2054	1.2105	1.2693		31	3.9525	4.3934	3.9236	4.501	3.3735	4.0737	4.1487	4.4823	3.5675	4.6133	4.1191	3.5247	3.9761	4.4988	4.0212	4.0155	3.9203	4.1909	4.7883	3.9145
1.18426	0.0916062	3.97188	0.470117		32	1.2253	1.2155	1.1015	1.1224	1.1389	1.157	1.1847	1.1529	1.2191	1.3515	1.1722	0.983	1.3033	1.3742	1.1162	1.2056	1.1585	1.1212	1.2699	1.1123		32	4.0202	4.4894	3.6421	4.1783	3.3326	4.1165	4.2107	4.3242	3.4091	4.6215	3.862	3.0186	4.1581	4.1584	3.9327	3.6902	3.8325	3.9816	5.0056	3.4533
1.23501	0.0871689	4.08055	0.42635		33	1.2003	1.3679	1.2715	1.2203	1.3252	1.3043	1.2305	1.1167	1.1615	1.2884	1.1436	1.1499	1.3858	1.1788	1.1476	1.3314	1.2837	1.1481	1.3226	1.1222		33	4.0337	4.517	3.7319	4.6665	3.4382	4.1216	4.1076	4.521	4.1194	4.6052	3.9815	3.3679	3.9723	4.4426	3.4949	4.0092	3.9369	4.1517	4.8477	3.5443
1.2123	0.0765316	3.97795	0.373006		34	1.2171	1.2462	1.14	1.1714	1.1341	1.1197	1.1898	1.2298	1.1416	1.2967	1.1939	1.1302	1.2954	1.1781	1.2374	1.3318	1.2112	1.1481	1.4157	1.2177		34	4.0215	3.9757	3.3552	4.2615	3.5273	4.302	4.254	4.3879	3.478	4.6582	3.8164	3.6911	4.222	4.0138	3.6359	3.8049	3.6494	4.1094	4.6279	3.7669
1.17544	0.0937211	4.00238	0.390525		35	1.1473	1.1923	1.0746	1.1556	1.0906	1.0996	1.1298	1.055	1.1867	1.3105	1.138	1.0949	1.3433	1.3047	1.1055	1.2576	1.2091	1.0921	1.3615	1.1602		35	3.9287	4.3402	3.8082	4.2462	4.1575	4.0224	3.8905	4.4411	3.5532	4.6805	3.8426	3.2864	3.9925	3.8804	3.734	3.5998	3.8096	4.3546	4.8433	3.6359
1.16728	0.0628992	4.05219	0.38926		36	1.1896	1.2182	1.111	1.0884	1.0747	1.1968	1.1519	1.2504	1.1357	1.1921	1.138	1.0677	1.2424	1.2019	1.1471	1.2945	1.2209	1.1634	1.0821	1.1789		36	4.003	4.7067	3.7279	4.1251	3.6562	4.1591	4.2964	4.3678	3.7556	4.5629	3.8649	3.5987	3.9784	4.1415	3.7914	3.737	3.9286	4.2638	4.9451	3.4337
1.16895	0.0667152	3.94349	0.366798		37	1.2853	1.2526	1.0632	1.1143	1.1858	1.1119	1.1778	1.1251	1.1452	1.21	1.1321	1.0878	1.2923	1.1128	1.2032	1.2327	1.2283	1.1061	1.1932	1.1193		37	4.018	4.301	3.6397	4.1598	3.4863	4.0227	3.9623	4.2428	3.6172	4.7436	3.8841	3.4996	3.8765	4.2843	3.8409	3.7857	3.5569	4.0907	4.5221	3.3357
1.13139	0.0869667	4.04288	0.393289		38	1.1859	1.1352	1.1265	1.1173	1.0448	1.185	1.0963	1.1527	1.1053	1.2553	0.9935	1.0026	1.1281	1.1414	1.173	1.2516	1.1326	1.0039	1.3312	1.0656		38	4.1524	4.181	3.8137	4.3679	3.9662	4.028	4.093	4.5045	3.4623	4.5287	3.9823	3.4944	3.9814	4.3737	3.7137	4.2525	3.3993	3.9088	4.9559	3.6979
1.15616	0.081322	3.99906	0.384682		39	1.1884	1.3031	1.176	1.2027	1.0459	1.1566	1.1574	1.0879	1.1594	1.1282	1.0707	1.0688	1.2294	1.3573	1.2125	1.0774	1.0712	1.1375	1.1962	1.0966		39	3.8058	4.1166	3.6964	4.1413	3.8473	3.9177	4.2545	4.2014	3.561	4.7649	3.7939	3.4753	4.2845	4.1373	3.6128	4.023	3.7911	4.0951	4.9405	3.5207
1.15091	0.075971	4.02021	0.356998		40	1.1424	1.1921	1.1367	1.1772	1.0991	1.1076	1.0417	1.1611	1.0704	1.2476	1.0712	1.0763	1.2453	1.0776	1.295	1.1971	1.2634	1.0484	1.1761	1.1919		40	3.9315	4.3475	3.7514	4.4176	3.9168	4.0789	4.3789	4.6041	3.6031	4.615	3.9815	3.7685	3.9131	4.2018	3.6122	3.5141	3.5531	4.0553	4.4713	3.6885
1.14189	0.0707798	3.95304	0.377603		41	1.1184	1.1625	1.1146	1.1338	1.2027	1.2041	1.0276	1.106	1.0615	1.1612	1.0619	1.0064	1.1767	1.1107	1.1827	1.2418	1.2892	1.114	1.1647	1.1972		41	3.8766	4.2159	3.9002	4.0552	3.4768	3.9552	4.0084	4.4835	3.4797	4.5084	3.9883	3.2836	3.8077	4.2482	3.4755	3.8054	3.8628	4.1235	4.7786	3.7273
1.13281	0.072765	3.9246	0.350175		42	1.1507	1.1665	1.0454	1.1312	1.167	1.0641	1.0837	1.1253	1.0971	1.2321	1.1141	0.9859	1.2354	1.2649	1.1432	1.1088	1.1133	1.0255	1.2116	1.1904		42	3.8216	4.222	3.6681	4.1534	3.8286	3.8169	4.0189	4.2989	3.524	4.6205	3.7276	3.6107	3.6734	4.0991	3.5455	3.7033	3.5519	4.0423	4.765	3.8003
1.10772	0.0595487	3.91683	0.397049		43	1.1178	1.124	1.0827	1.0585	1.257	1.0942	1.1136	1.1029	1.0748	1.1556	1.086	1.0725	1.0302	1.1083	1.0761	1.1799	1.0488	1.0435	1.2354	1.0926		43	3.9689	4.0424	3.8115	4.0583	3.9109	3.8514	4.0996	4.4753	3.6746	4.5519	3.7446	3.3565	3.4342	4.1502	3.3762	3.7873	3.5805	3.7923	4.9332	3.7368
1.11562	0.0761168	4.01906	0.384096		44	1.1832	1.1875	1.076	1.0125	1.0777	1.1246	1.1094	1.1205	1.0134	1.1545	1.1834	0.9948	1.1457	1.1168	1.1834	1.0869	1.175	0.9594	1.2567	1.151		44	3.6671	4.6186	3.9529	4.2009	3.71	3.9688	4.1564	4.5204	3.4247	4.5652	3.7261	3.5637	4.1474	4.4159	3.593	3.6873	3.9615	4.253	4.5844	3.6639
1.10097	0.0521707	4.00215	0.406591		45	1.1154	1.1085	1.029	1.086	1.0351	1.055	1.1845	1.0767	1.0162	1.1392	1.0748	1.0394	1.146	1.0951	1.1888	1.1228	1.1528	1.0673	1.1682	1.1186		45	3.9519	3.9427	3.7906	4.2363	3.6736	4.1939	4.2867	4.4867	3.4507	4.8288	3.6469	3.537	3.9866	4.0274	3.5996	3.9539	3.7385	4.2113	4.8994	3.6005
1.10527	0.0676144	3.96836	0.370355		46	1.1192	1.1677	1.1236	1.1307	1.0365	1.0957	0.9766	1.1347	1.0287	1.14	1.0395	0.9692	1.1397	1.2038	1.0701	1.1583	1.1761	1.0633	1.1496	1.1824		46	3.7064	4.0467	3.8875	4.0114	3.4522	4.3825	3.9653	4.4636	3.4685	4.4055	3.5414	3.7212	3.9142	4.2308	3.6117	3.954	3.7513	4.1795	4.8813	3.7922
1.09408	0.0791603	3.92467	0.413624		47	1.0663	1.1057	1.0372	1.0766	0.9499	1.0986	1.0659	1.185	1.019	1.1612	1.1072	0.9464	1.2803	1.0959	1.0935	1.0552	1.1462	1.1921	1.1446	1.0547		47	3.5448	4.2048	3.4957	4.3309	3.8052	4.0213	3.9669	4.476	3.4658	4.7877	3.8475	3.2849	3.8064	4.2478	3.6431	3.5504	3.7917	3.7772	4.6831	3.7622
1.10056	0.0619115	3.9488	0.398683		48	1.0256	1.0969	1.1039	1.0194	1.0517	1.1956	1.1153	1.1391	1.0976	1.2189	1.0979	0.9437	1.1325	1.1141	1.106	1.1351	1.0858	1.0493	1.1524	1.1304		48	3.6004	4.4154	3.6648	4.055	3.7115	4.0262	3.9912	4.4787	3.7639	4.4815	3.5744	3.5429	3.8688	4.3546	3.6557	3.8774	3.4615	3.9335	4.9407	3.5779
1.06733	0.0570674	3.9748	0.421212		49	1.034	1.1329	1.0919	1.0501	1.0219	1.0482	1.0903	1.1617	1.0217	1.1179	1.0784	0.9283	1.1556	0.9777	1.0494	1.0408	1.0614	1.0785	1.1086	1.0973		49	3.8552	4.1242	3.6346	4.3435	3.6972	4.0369	4.1768	4.7733	4.1932	4.328	3.6655	3.4522	3.7389	4.124	3.6293	3.5507	3.8014	3.7435	5.0526	3.5751
1.09681	0.0315588	3.91565	0.341994		50	1.0585	1.1145	1.1208	1.1232	1.0556	1.1273	1.111	1.0883	1.0092	1.0884	1.1142	1.0668	1.0938	1.1161	1.1031	1.0754	1.1491	1.1059	1.1006	1.1144		50	3.9524	4.2176	3.9706	4.2	3.5844	4.189	4.0668	4.3647	3.3679	4.3479	3.7091	3.4939	3.679	4.1554	3.5806	3.5525	3.9019	3.7238	4.5994	3.6561
1.0847	0.053681	3.9623	0.398112		51	1.0632	1.1544	1.0469	1.054	1.1177	1.0771	1.0796	1.159	1.0363	1.1289	1.0081	1.0414	1.1564	1.1273	1.01	1.0986	1.0627	1.1676	0.9969	1.1078		51	3.9315	4.8934	3.6869	3.8183	3.8317	4.21	4.0091	4.5222	3.6412	4.5082	3.8264	3.5066	3.6493	3.987	3.8418	3.7091	3.7129	3.8624	4.6659	3.4321
1.07407	0.0548111	3.88892	0.32401		52	1.0678	1.0762	1.1115	1.0216	0.9541	1.0587	1.0799	1.0679	0.9863	1.1516	1.0587	0.9911	1.0666	1.0845	1.1401	1.1486	1.1223	1.0547	1.1341	1.1051		52	3.7844	4.3656	3.7214	4.1812	3.7163	3.9241	3.8647	4.3737	3.4983	4.4741	3.5863	3.5393	3.6906	3.851	3.5554	4.0124	3.6836	3.9686	4.4573	3.5301
1.0977	0.0514696	3.94451	0.361336		53	1.0159	1.139	1.0754	1.0728	1.009	1.0773	1.1424	1.1538	1.0303	1.1711	1.0687	1.1093	1.1159	1.1683	1.1253	1.0301	1.1165	1.0803	1.1684	1.0842		53	3.8873	4.0632	3.6423	4.4037	3.5263	4.1979	3.9968	4.4269	3.582	4.5457	3.6112	3.5155	3.7081	4.0547	3.7163	4.0517	3.7305	3.8555	4.7329	3.6416
1.08215	0.0597438	3.89526	0.337076		54	0.9942	1.0282	1.0833	1.0683	0.96	1.083	1.1096	1.0949	1.1726	1.1027	1.0632	1.148	1.1638	1.0315	1.0889	1.0441	1.0838	1.0226	1.1966	1.1038		54	3.7686	4.1667	3.5935	4.2493	3.6802	4.0969	3.834	4.5464	3.4396	4.3061	3.6539	3.7913	3.7923	4.1669	3.5371	3.7586	3.6344	4	4.482	3.4075
1.08458	0.0534451	3.94047	0.375201		55	1.0489	1.2016	1.0868	0.9751	1.0405	1.0806	1.0979	1.1059	1.075	1.1297	1.0454	1.0632	1.1458	1.1501	1.0291	1.1227	1.1034	1.0248	1.1278	1.0373		55	3.7606	4.2945	3.4747	4.0942	3.8724	4.0887	4.0661	4.4631	3.4844	4.7576	3.5769	3.5337	3.8591	4.1744	3.7606	3.9926	3.6411	3.7004	4.6013	3.613
1.0598	0.0612188	3.93284	0.380859		56	1.0806	1.0114	1.1277	0.992	1.0249	1.0408	1.0348	1.1927	0.9753	1.1452	1.0557	1.0104	1.1384	1.108	1.0096	1.0599	1.0391	0.9795	1.1256	1.0443		56	3.9398	4.146	3.672	4.0737	3.7163	4.344	4.0017	4.6021	3.5701	4.5781	3.4165	3.7565	3.7685	4.2521	3.374	3.621	3.825	3.9748	4.5338	3.4908
1.08503	0.0521754	3.96452	0.393119		57	1.0688	1.0951	1.0594	1.0527	1.0732	1.1517	1.0862	1.0432	1.0145	1.2	1.023	1.0095	1.1416	1.1378	1.0897	1.1607	1.0471	1.0505	1.1189	1.077		57	4.002	4.0832	3.8144	4.3777	3.9281	4.311	3.9904	4.447	3.4744	4.4532	3.5594	3.8535	3.6271	4.1899	3.4842	3.532	3.7206	4.122	4.858	3.4623
1.06484	0.0627845	3.86159	0.355716		58	1.0188	1.1686	1.0854	1.0115	1.0895	0.9545	1.0579	1.0432	0.9636	1.1246	1.0564	0.9383	1.0685	1.0671	1.095	1.1097	1.1097	1.06	1.1311	1.1434		58	3.5623	3.8309	3.643	4.2473	3.7708	4.095	3.9704	4.4109	3.5849	4.5087	3.6422	3.8259	3.6157	3.9893	3.3999	3.6744	3.4001	3.8481	4.6249	3.5872
1.06393	0.0547035	3.93292	0.40699		59	1.0453	1.0525	1.0803	1.0252	1.0727	1.1248	1.0584	1.0991	0.9628	1.1434	1.0715	0.9446	1.0155	1.0459	1.1449	1.1058	1.024	1.0795	1.1382	1.0442		59	3.7834	4.1506	3.7282	4.1143	3.7418	4.006	4.1805	4.2831	3.5626	4.605	3.5271	3.6531	3.8207	4.3313	3.4704	3.6889	3.6951	4.1915	4.8819	3.2428
1.07478	0.0519457	3.9907	0.436661		60	1.1122	1.1494	1.1409	1.0032	1.0254	1.0799	1.0856	1.1106	1.0404	1.1202	0.9901	0.9964	1.058	1.0365	1.0839	1.0536	1.0829	1.124	1.1653	1.0371		60	3.8174	4.6834	3.6435	4.4518	3.5693	4.1243	4.2417	4.5048	3.568	4.5754	3.6629	3.6482	3.4975	3.8953	3.4659	3.9188	3.9798	4.1839	4.8472	3.5349
1.06915	0.0555667	3.94184	0.392054		61	1.002	1.1532	1.0357	1.0161	1.0079	1.0696	1.0395	1.1515	1.0776	1.0386	1.0702	0.9862	1.0367	1.1905	1.0574	1.0913	1.1031	1.0365	1.1409	1.0784		61	3.706	4.8116	3.8674	4.0961	3.792	3.9447	4.2242	4.3799	3.6684	4.4739	3.774	3.6693	3.8861	3.8478	3.4659	3.754	3.6813	3.7058	4.7174	3.3711
1.04365	0.0504516	3.93151	0.457768		62	1.0435	1.1762	1.093	0.9467	1.0024	1.0483	1.0742	1.0289	1.0361	1.0614	1.0041	0.9984	1.0985	1.0871	0.9787	1.0633	1.0321	0.9963	1.0585	1.0453		62	3.7734	4.7186	3.7802	4.0381	3.7303	4.0606	4.169	4.5935	3.7212	4.4227	3.4135	3.3495	3.7645	4.2145	3.5152	3.6809	3.6839	3.798	4.9312	3.2714
1.06619	0.0700877	3.98002	0.391166		63	1.0706	1.1172	1.0539	1.0268	0.907	0.9632	1.0674	1.0659	1.007	1.0797	1.0464	0.9674	1.1011	1.2187	1.1051	1.0862	1.0714	1.1009	1.0992	1.1687		63	3.6833	4.3493	3.7295	4.1991	4.0465	3.991	4.2711	4.4108	3.8109	4.5397	3.6579	3.7012	3.7151	4.2661	3.6591	3.5822	3.4891	3.9572	4.9599	3.5814
1.04612	0.044565	3.95558	0.347553		64	1.0066	1.0835	0.9448	1.045	1.007	1.0941	1.0601	1.0676	1.0461	1.0819	1.0438	0.9937	0.9934	1.0693	1.0105	1.0652	1.0583	1.0674	1.1478	1.0363		64	3.7826	4.5829	3.845	4.1318	3.827	4.3631	4.0047	4.075	3.6713	4.2583	3.583	3.5055	3.7354	4.0282	3.6608	3.7519	3.8703	3.8664	4.8766	3.6918
1.04771	0.0473375	3.97474	0.447757		65	1.0865	1.0562	0.9649	0.958	0.977	1.051	1.1282	1.0896	1.018	1.0365	1.0349	1.0068	1.0654	1.063	1.0856	1.0768	1.0628	1.0377	1.1279	1.0273		65	3.6573	4.3293	3.8571	4.349	3.7109	4.2232	4.045	4.3358	3.9362	4.5246	3.4355	3.7691	3.6291	3.7824	3.6777	3.9033	3.6483	3.7712	5.3677	3.5421
1.05462	0.0582343	3.96001	0.320152		66	1.1069	1.0351	1.0574	0.9845	0.9505	1.0558	1.0127	1.1356	1.035	1.147	1.0772	1.1125	1.0883	1.1205	0.9622	1.04	1.0337	1.0188	1.1244	0.9943		66	3.8537	4.1544	4.0056	4.0265	3.7096	4.2652	4.1655	4.4263	3.6782	4.4502	3.5685	3.5544	3.9259	4.0399	3.5593	3.7769	3.6533	4.0672	4.6351	3.6845
1.06635	0.04353	3.89679	0.368361		67	1.0656	1.0473	1.0322	1.0095	1.0059	1.0796	1.0922	1.0886	1.1275	1.1611	1.0803	1.0147	1.0459	1.1242	1.0206	1.0615	1.078	1.0102	1.0791	1.1029		67	3.8237	4.4193	3.5685	3.9447	3.6854	4.0368	3.9927	4.2078	3.5074	4.6978	3.6664	3.6635	3.709	4.1416	3.4709	3.7603	3.6272	3.9561	4.6253	3.4314
1.03991	0.0384784	3.93773	0.359864		68	1.0406	1.0698	1.0687	1.0206	1.0085	1.0312	1.0966	1.0603	0.9959	1.0474	1.0015	0.9675	1.1006	1.1161	1.0375	1.0585	1.0473	1.0141	1.0065	1.009		68	3.7463	4.2952	3.6236	4.309	3.695	4.0899	3.9747	4.2996	4.1069	4.4196	3.5728	3.2234	3.8482	4.0664	3.6823	3.8605	3.6932	3.8984	4.7542	3.5954
1.04344	0.0635897	3.9271	0.348088		69	1.0201	1.0803	0.9831	1.0279	1.0028	0.9751	1.045	1.1097	0.9825	1.0968	0.973	0.9291	1.124	1.1242	1.1316	1.0602	1.019	0.9872	1.1477	1.0495		69	3.9238	4.2165	3.7028	3.8909	3.7501	4.4103	4.0864	4.3341	3.7275	4.2533	3.5703	3.7797	3.7886	4.496	3.6588	3.4099	3.7367	3.657	4.6134	3.5358
1.03639	0.051352	4.00091	0.354211		70	1.0203	1.0618	0.9505	0.9786	1.029	1.0078	1.0405	0.9596	1.0609	1.1223	1.0302	1.0163	1.082	1.0992	0.9821	1.1122	1.0061	1.0003	1.114	1.054		70	3.9562	4.5379	3.8182	4.2282	3.3733	4.2626	4.2921	4.3727	3.9286	4.6605	3.5808	3.6703	3.8062	4.3447	3.6319	3.9363	3.6746	3.9235	4.3163	3.7033
1.04068	0.0526411	3.94072	0.324285		71	0.972	1.0981	1.0772	1.0618	0.9552	1.0845	1.0476	1.1215	1.0094	1.1078	1.0458	1.118	1.0136	1.0253	0.9444	1.0032	1.0237	0.9866	1.0634	1.0544		71	3.9215	4.1919	4.1153	3.8462	3.9904	3.8708	4.1832	4.422	4.0333	4.4664	3.5208	3.668	3.6169	3.844	3.5772	3.7083	3.9266	3.7019	4.6751	3.5347
1.04905	0.0520698	3.89814	0.353395		72	1.0752	1.1406	1.0308	0.9679	0.9986	1.0449	1.0923	1.0528	0.9874	1.0717	1.0309	0.9549	1.142	1.0888	1.046	1.0503	1.0866	1.0216	1.0997	0.9979		72	3.6991	4.7456	3.6208	3.8235	3.6971	4.2544	3.6826	4.0349	3.5632	4.5443	3.5462	3.6944	3.8949	4.1191	3.5091	3.7772	3.8641	3.7728	4.4604	3.659
1.04343	0.0507721	4.00576	0.385716		73	1.1123	1.0816	1.0904	1.0043	1.0579	1.0616	1.0243	1.1131	1.0032	1.071	1.0487	0.9722	1.0866	1.1189	0.9647	0.9619	1.0735	0.99	1.0073	1.0252		73	4.1276	4.7711	3.8996	3.991	4.2681	3.8187	4.2705	4.4233	3.7691	4.615	3.4534	3.5798	3.7326	3.9951	3.617	3.6418	3.8478	3.9035	4.6887	3.7015
1.05305	0.0418281	3.89027	0.370562		74	1.0422	1.1038	1.0634	1.0106	0.9987	1.0341	1.0845	1.1161	1.0842	1.101	1.0505	1.0209	1.0709	1.0905	0.9782	1.0755	1.0857	0.9712	1.0327	1.0463		74	3.6951	4.3438	3.572	4.136	3.5126	3.9222	3.9069	4.4907	3.8781	4.6151	3.6669	3.6785	3.6928	4.0188	3.4982	3.3909	3.6945	3.9876	4.5622	3.5425
1.04023	0.0495721	3.94264	0.350651		75	1.1007	1.0806	0.9885	1.0055	0.9199	1.1285	1.0188	1.0572	0.9973	1.0504	1.0529	0.9775	1.0105	1.0722	1.0196	1.0731	1.0499	1.0244	1.0843	1.0928		75	3.9198	4.1125	3.7226	4.2548	3.7059	4.2831	3.9593	4.3721	3.6242	4.3163	3.6283	3.6456	3.7414	4.3911	3.7471	3.5936	3.7626	3.7478	4.7978	3.5269
1.03235	0.0443397	3.93627	0.345703		76	1.0691	1.0517	1.0466	1.0077	0.9523	1.039	1.0721	0.98	0.9932	1.052	1.0444	0.9702	1.0494	1.0499	1.0735	0.9669	1.0269	1.0726	1.1272	1.0024		76	3.6224	4.5016	3.8641	4.0594	3.8373	3.8565	3.9379	4.4583	3.544	4.393	3.7244	3.5013	3.9094	4.2806	3.6359	3.7893	3.7513	4.1109	4.5433	3.4046
1.0455	0.0503513	4.03215	0.342425		77	1.0731	1.0086	1.0989	0.9851	1.0277	1.0616	0.9905	1.0369	1.0056	1.1505	1.0487	1.1037	1.1099	1.009	1.029	0.9777	1.096	0.9703	1.0457	1.0816		77	4.0991	4.4142	3.8577	4.1768	3.7799	4.2728	4.0481	4.3922	3.9426	4.487	3.8317	3.7004	3.8957	4.4433	3.5064	3.8985	3.6815	3.9035	4.7712	3.5404
1.0429	0.046668	3.98191	0.363662		78	1.0517	1.0452	1.044	1.0023	0.979	1.0631	1.0154	1.1065	1.0249	1.0314	0.9844	1.018	1.1446	1.1381	1.0086	1.0236	1.0605	1.0258	1.0917	0.9991		78	3.7692	4.2883	3.7876	4.2852	3.9419	4.1718	4.0371	4.2668	3.7492	4.6441	3.526	3.6272	3.7871	3.8472	3.6383	3.8775	3.8521	4.0749	4.9257	3.541
1.03375	0.043093	3.93189	0.371236		79	1.1191	1.0518	1.0256	0.9581	1.0321	0.9766	1.0282	1.0334	1.0156	1.0277	1.0807	1.1188	1.073	1.0428	1.0036	1.0633	1.0343	0.9681	1.0065	1.0158		79	3.7888	4.5729	3.9444	3.9405	3.5967	4.1557	3.9864	4.3653	3.6273	4.7035	3.7623	3.6077	3.7572	4.2338	3.5255	3.8808	3.6485	3.5605	4.4886	3.4914
1.04	0.0471161	3.93424	0.342235		80	1.0937	1.0735	1.0139	0.9367	0.9724	1.0323	1.1201	1.0302	0.9963	1.0378	1.0624	1.0561	1.1163	1.0201	1.0311	1.0075	1.0447	1.0155	1.1101	1.0293		80	3.6697	4.0994	3.6471	4.1712	3.7673	4.4432	4.2915	4.2344	3.6745	4.4544	3.6462	4.0031	3.8012	3.8359	3.6524	3.4698	3.6676	3.9712	4.6465	3.5382
1.03918	0.0479018	4.02623	0.397774		81	1.0893	1.0196	1.0176	0.9494	1.0214	1.0874	0.9607	1.0505	0.9842	1.0661	1.0494	1.0792	1.0294	1.1558	1.038	1.0507	1.0699	0.9891	1.0539	1.022		81	3.7868	4.416	3.7854	4.0938	3.9594	4.5359	3.9773	4.3801	3.8548	4.689	3.5272	3.6938	3.7426	4.346	3.5901	3.7614	3.83	4.0162	4.9456	3.5932
1.04466	0.0534798	3.94997	0.304516		82	1.0178	1.0667	1.0714	0.953	1.0546	0.9391	1.0416	1.1098	0.9856	1.0557	1.0446	1.0805	0.9951	1.1674	0.995	1.0336	1.0571	1.0543	1.0858	1.0844		82	3.7314	4.0206	3.6137	4.2284	3.8891	4.2052	3.9536	4.3019	3.6797	4.4399	3.5017	3.6953	4.1121	4.2402	3.8173	3.8469	3.7563	3.73	4.6006	3.6354
1.02782	0.0450648	3.98852	0.399164		83	1.0237	1.0637	1.0275	0.9442	1.0759	1.0066	1.0742	0.9829	1.002	1.0983	1.0573	0.969	1.0864	0.9479	1.0563	1.0534	1.0524	1.0319	0.9944	1.0085		83	3.7814	4.4401	3.9261	4.1997	3.7114	4.0287	4.1297	4.3129	3.5637	4.4253	3.6984	3.7366	3.8482	4.5178	3.4025	3.8988	3.7421	3.9186	5.0064	3.482
1.04506	0.0635242	4.00331	0.370595		84	1.1066	0.9953	0.9866	0.9734	0.9012	1.0169	1.0474	1.0694	1.0795	1.1407	1.0377	1.0926	1.0561	1.1874	0.9913	1.0336	1.0204	1.0483	1.0954	1.0213		84	3.8961	4.4435	3.853	4.2681	3.6546	4.2613	4.1022	4.2186	3.745	4.4404	3.4319	3.7306	4.0333	4.3707	3.4671	3.8922	3.6798	4.1923	4.8095	3.5761
1.03541	0.0482276	4.01252	0.40334		85	1.1214	1.0533	1.0178	0.9274	0.9518	1.1118	1.0211	1.0834	1.0322	1.0086	1.0136	1.0567	1.0615	1.0299	1.0395	1.0476	1.0597	1.007	1.083	0.9809		85	3.8909	4.3821	3.5869	4.0612	4.1166	4.1774	4.204	4.2358	3.7357	4.5287	3.7291	3.5095	4.02	4.8425	3.5216	3.7419	3.6495	4.0464	4.7633	3.5072
1.0333	0.0490379	3.98496	0.323253		86	1.0304	1.0639	1.0782	0.9724	1.0458	0.982	1.0989	0.983	0.9737	1.0082	1.0077	0.9947	1.0572	1.1549	1.0372	1.0241	1.0222	1	1.0196	1.112		86	4.1167	4.4237	3.6633	4.1834	3.9862	4.0459	4.0825	4.3008	3.7838	4.4383	3.6571	3.5109	3.7777	4.3749	3.8921	3.6745	3.6393	3.7669	4.6321	3.7491
1.03584	0.0509162	3.99847	0.384289		87	1.088	1.0781	1.0604	0.9186	0.9596	1.0321	1.0071	1.013	1.0325	1.0424	1.0044	0.9732	1.0858	1.1334	1.0619	1.0993	1.031	1.0022	1.0553	1.0385		87	3.6125	4.4807	3.9157	4.0805	3.6443	4.4669	4.2357	4.4811	3.6465	4.4953	3.6388	3.461	3.8213	4.4882	3.6068	3.8444	3.7536	3.9323	4.6334	3.7303
1.04167	0.0449802	4.1208	0.462131		88	1.0632	1.0437	1.0366	1.0222	1.119	0.9857	1.0277	1.0399	1.0231	1.0006	1.0086	0.9467	1.0939	1.0798	1.0836	1.0536	1.0566	1.043	1.1221	0.9839		88	3.8845	4.5295	3.8221	4.36	4.0338	4.3013	4.1383	4.4006	4.0148	4.7203	3.5109	3.4318	3.9391	4.9011	3.8093	4.3147	3.6497	3.7949	5.1566	3.7027
1.03276	0.0446937	4.06669	0.32139		89	1.0484	1.0486	1.0392	0.935	0.9323	1.0388	1.0467	1.068	1.0414	1.0371	1.0638	1.0132	1.0676	1.0182	0.9714	1.0802	1.0442	1.0102	1.0359	1.115		89	3.9045	4.2988	4.0515	4.0175	3.92	4.4399	3.9422	4.3955	3.9995	4.7978	3.7775	3.641	3.9042	4.6375	3.6065	3.8527	3.7554	4.0989	4.3348	3.9581
1.03174	0.0462185	4.14082	0.301111		90	1.0025	1.0178	1.014	1.0263	0.9685	0.9997	0.9895	1.0491	0.947	1.0798	1.0288	1.005	1.1154	1.0948	1.1237	1.0591	1.0082	1.0438	1.0087	1.0531		90	3.9228	4.3764	3.9406	4.2561	4.0291	4.2595	4.051	4.5468	3.8063	4.6945	3.8149	4.0406	4.063	4.606	3.8403	3.9463	3.8947	4.0579	4.7464	3.9233
1.03257	0.0214752	4.07419	0.312029		91	1.0432	1.0426	1.0354	1.0046	1.0197	1.0352	1.0511	1.0791	0.9788	1.0096	1.042	1.0084	1.02	1.0319	1.0292	1.0487	1.0374	1.0434	1.0518	1.0393		91	4.2036	4.3705	3.9	4.0968	3.869	4.3611	4.1729	4.1202	3.9521	4.6173	3.7382	4.101	3.9639	4.5596	3.5012	3.8305	3.8274	3.9368	4.6373	3.7244
1.04041	0.0467152	4.15156	0.381984		92	1.0449	1.0727	1.1378	0.9514	1.0216	0.9948	1.077	1.0386	1.0846	1.0561	1.0727	0.9686	1.0563	1.0734	1.042	0.9554	1.0079	1.0289	1.0533	1.0703		92	4.1476	4.876	4.081	4.3089	4.1957	4.4955	4.0663	4.2937	4.1683	4.5965	3.7191	3.5665	3.774	4.5855	3.8241	4.1238	3.6867	4.0504	4.8116	3.66
1.03729	0.0459616	4.13213	0.41911		93	1.0779	1.0443	1.0993	1.0166	0.9436	1.0406	1.0143	1.1251	0.9664	1.0526	1.0136	1.0681	0.9904	1.0748	1.0315	0.9768	1.0515	1.0329	1.0349	1.0906		93	3.951	4.8272	3.9047	4.2795	3.7579	4.233	4.0936	4.4963	4.0117	4.3484	3.4529	3.9782	3.9807	5.0241	3.4638	4.2198	3.9443	4.1429	4.8016	3.731
1.0446	0.0626298	4.14151	0.368444		94	1.1478	1.0188	1.029	0.937	1.0309	1.0355	1.078	1.0637	1.0006	1.1101	1.0128	1.1787	0.983	1.1491	1.0035	1.0646	0.9837	0.9826	1.0368	1.0458		94	4.2206	4.5369	3.7868	4.458	3.7509	4.3525	4.5075	4.3666	3.7532	4.5504	3.7891	3.8215	3.9876	4.541	3.5824	3.8919	3.9365	4.2784	4.8839	3.8344
1.02975	0.0498817	4.17426	0.291748		95	0.9859	0.9856	0.9422	1.0255	1.0398	0.9685	1.0256	1.0274	1.0123	1.0065	1.0485	1.0177	1.0806	1.1346	0.9738	1.0449	1.026	1.1044	1.0263	1.119		95	4.1935	4.4672	4.2022	4.1509	4.3738	4.3578	4.212	4.4486	4.1088	4.6756	3.7361	3.9014	3.7831	4.4405	3.9631	3.8439	3.9561	4.0095	4.7526	3.9085
1.03148	0.0530439	4.22462	0.305804		96	1.0693	0.9894	1.1003	0.9531	1.049	1.0436	1.0021	1.0919	0.9837	1.1171	1.0042	1.0583	1.0648	1.0728	1.05	0.9929	1.0426	0.9223	1.065	0.9572		96	3.9501	4.878	4.0778	4.5762	4.1703	4.4613	4.282	4.219	4.1537	4.6909	4.0081	3.7802	3.9521	4.6769	3.973	4.2401	3.9814	4.1289	4.4439	3.8485
1.01883	0.0478421	4.15933	0.335835		97	1.0703	1.0026	1.093	0.9753	0.9909	0.9839	1.0098	0.9476	0.9099	1.0237	1.0438	1.015	1.0704	1.0895	1.011	1.0101	1.0821	0.9979	1.0005	1.0493		97	4.2713	4.4472	4.0544	4.4712	3.8684	4.4276	4.2328	4.4291	3.8667	4.6035	3.8592	3.841	3.8706	4.63	3.6686	3.8072	4.0033	4.2121	4.8047	3.8176
1.0326	0.0420111	4.19665	0.311986		98	0.9893	1.0337	1.023	0.9976	1.0331	1.1367	1.0132	1.0631	1.0115	1.0424	1.043	1.0479	1.067	1.0895	0.9682	0.971	1.0559	0.9838	1.0103	1.0717		98	4.4842	4.4856	4.2612	4.3717	3.9372	4.088	4.4487	4.5452	4.0783	4.6766	3.7924	3.9035	3.8889	4.6465	3.8096	4.0469	3.8001	4.2755	4.5554	3.8374
1.03724	0.0431675	4.22341	0.344292		99	1.076	1.0707	1.1027	0.9644	1.1316	1.0258	1.0152	0.9844	0.9982	1.0688	0.9959	1.0788	1.0293	1.0602	1.0408	0.9824	1.0106	1.0546	1.0201	1.0343		99	3.9574	4.8599	4.103	4.433	4.1005	4.4772	4.4437	4.7428	4.327	4.5198	3.7591	3.6709	4.0045	4.592	3.8054	3.9885	4.1612	4.0527	4.5909	3.8786
1.01176	0.0555287	4.23314	0.29913		100	1.0287	1.0349	1.0967	1.0464	0.9587	1.0846	0.9807	1.0417	0.9245	1.0395	0.9753	0.9903	1.1449	0.9949	1.0376	0.9882	0.9927	0.9411	0.9499	0.9839		100	4.3449	4.475	4.2536	4.3903	3.9165	4.8363	4.3768	4.3782	3.8255	4.6702	4.0965	4.1755	4.1717	4.5071	3.7098	4.1151	3.8002	4.2791	4.4486	3.8919
1.02615	0.0498153	4.18866	0.328672		101	1.0336	0.9772	1.054	0.9457	1.0244	1.004	0.9957	1.0827	0.9799	1.0067	0.9985	0.9125	1.0769	1.1002	1.0513	1.0223	1.0643	1.0334	1.0978	1.062		101	3.8029	4.14	4.0581	4.4487	4.256	4.2339	4.4887	4.3505	4.0799	4.6143	3.7812	3.9778	4.0355	5.017	3.639	3.9293	3.9012	4.2434	4.5401	4.2357
1.03245	0.0475699	4.22581	0.296308		102	1.0117	1.1005	1.0676	0.9579	1.0148	1.0414	1.0617	1.0237	0.9779	1.0679	0.9996	1.1296	1.0725	1.1102	0.9921	1.0061	1.0073	0.9701	1.009	1.0274		102	4.0798	4.6729	3.8905	4.4051	4.1858	4.3057	4.3788	4.3283	4.0609	4.7922	4.0208	3.9688	4.1873	4.7807	3.7519	4.1592	4.1031	4.0193	4.535	3.8901
1.0223	0.0481485	4.1932	0.338391		103	1.0807	1.0261	1.0035	0.9801	0.9624	0.9722	1.0287	1.0251	1.0003	1.091	1.042	0.9212	1.0732	0.9694	1.0301	1.078	1.0992	1.0304	0.9852	1.0472		103	3.9109	4.7805	4.036	4.4467	4.0233	4.0644	4.1654	4.5856	4.0344	4.8934	3.933	3.7048	3.8921	4.3217	3.6843	4.2185	4.2039	4.1997	4.7	4.0654
1.03115	0.0449257	4.24019	0.25163		104	1.0432	1.1043	1.0351	0.9862	1.0812	1.0016	1.0683	1.0621	0.9691	1.0484	0.9995	0.9669	1.0441	1.0934	1.0865	0.9631	1.0421	0.9822	1.0496	0.9961		104	4.3878	4.5306	4.1778	4.0873	4.1857	4.2055	4.4677	4.6501	4.0537	4.3225	3.8919	4.2558	4.2897	4.0588	3.9337	4.1118	4.1902	4.4274	4.7852	3.7905
1.02241	0.0471954	4.23771	0.296648		105	0.9418	1.1236	1.0881	0.9811	0.9676	1.02	1.011	1.0284	0.9743	0.9712	0.9919	1.1018	1.073	1.0523	1.0202	1.0217	1.0404	1.0054	1.0105	1.0238		105	4.2691	4.4056	4.0751	4.3083	4.2605	4.245	4.6102	4.1027	4.5594	4.6321	3.8437	3.8954	4.0225	4.481	3.7002	4.2436	4.011	4.1187	4.8974	4.0728
0.997245	0.0494029	4.28385	0.287579		106	0.9875	1.0672	1.0584	0.9282	0.9205	1.0112	0.9242	1.01	0.909	1.0081	1.0538	1.056	1.0331	1.0225	0.9383	0.9937	1.0241	0.981	1.0147	1.0034		106	4.3593	4.3985	4.3146	4.4069	4.1056	4.4703	4.5263	4.7192	4.3009	4.6922	3.9297	3.7953	4.0462	4.4289	3.7713	4.3184	3.9845	4.4509	4.6662	3.9918
1.02226	0.0508197	4.26659	0.290877		107	1.0419	1.0843	1.0706	1.0061	1.0581	0.9085	1.008	1.0028	0.9951	1.0326	1.0161	0.9855	1.108	1.0511	1.0411	0.9899	1.0869	0.9269	1.0495	0.9823		107	4.1731	4.6555	4.102	4.3615	4.1042	4.4652	4.1311	4.2946	3.9708	4.8857	4.1127	4.0092	4.0721	4.5637	4.0318	4.406	4.0891	4.2806	4.826	3.797
1.02915	0.0578059	4.29885	0.310071		108	1.011	1.0198	0.9981	1.0035	1.0877	1.0452	1.0236	0.9191	1.1064	1.0531	1.0486	0.9466	0.9995	1.1281	1.0996	0.9802	1.0618	0.9341	1.0265	1.0904		108	4.2753	4.7203	4.3226	4.4369	4.4053	3.9443	4.1475	4.5927	4.098	4.7493	3.9805	4.1148	3.9462	5.0224	4.0033	4.2916	3.9796	4.1405	4.6481	4.1577
1.0291	0.0439488	4.28768	0.326734		109	1.0214	1.0008	0.9876	1.0345	0.9829	1.0677	1.076	1.0419	0.9414	1.0292	1.0024	1.019	1.0591	1.122	1.0717	1.0057	1.0423	0.9621	1.03	1.0842		109	4.3012	4.4931	4.1129	4.1996	4.2805	4.4204	4.3764	4.373	3.9906	5.0703	4.0084	3.9492	4.0991	4.9753	4.0103	4.15	4.1231	4.1455	4.7646	3.9102
1.02896	0.043634	4.26937	0.281903		110	0.9805	1.0744	1.0372	0.9687	1.0206	1.0322	1.0021	1.0537	1.0444	1.0344	1.0616	1.0408	1.0963	1.0956	1.029	1.0465	0.9743	0.9481	0.9638	1.075		110	4.2103	4.6528	4.0318	4.5082	4.0232	4.438	4.2386	4.3363	4.2119	4.6405	4.2652	4.0359	3.9354	4.3904	4.0878	4.2457	4.2599	3.9786	5.0174	3.8795
1.02823	0.0622063	4.32138	0.285693		111	1.0994	0.9919	1.0048	1.0311	1.0459	1.003	0.9743	0.999	1.0276	1.0221	0.9948	1.1446	0.9425	1.1824	0.9921	0.9702	1.0916	0.9508	1.0651	1.0314		111	4.2935	4.6527	4.1621	4.7591	4.2428	4.218	4.4369	4.3379	4.2145	4.7669	3.9945	4.0266	3.936	4.5446	3.8787	4.2312	4.3979	4.3413	4.8958	4.0967
1.01939	0.0520518	4.34436	0.286453		112	0.998	1.0496	1.0752	0.9397	0.9885	0.9366	0.9906	1.0369	1.0667	1.0391	0.9963	1.0487	0.9876	1.082	0.9273	1.0795	1.0885	0.964	1.0724	1.0206		112	4.4071	4.3876	4.5198	4.4162	3.9016	4.9527	4.3589	4.3231	4.4674	4.7546	3.9188	4.1623	4.2427	4.5617	3.9976	4.2212	4.3764	4.3183	4.7204	3.8788
1.04715	0.0372506	4.27904	0.299583		113	1.0422	1.102	1.0883	0.9672	1.0272	1.0084	1.0444	1.0675	0.9878	1.0543	1.0585	1.0053	1.1062	1.0388	1.0476	1.0203	1.0465	1.0583	1.0825	1.0898		113	4.3687	4.6182	4.0758	4.4494	3.8362	4.4756	4.4174	4.2064	4.0187	4.6907	3.9637	3.8916	4.4733	4.6471	3.9338	4.3911	4.3177	4.0584	4.8167	3.9302
1.01977	0.0596262	4.36322	0.300276		114	1.0475	1.0251	1.0388	0.9695	0.9838	1.0587	1.0263	0.9207	1.0386	1.0628	1.0219	0.8972	1.0588	0.9642	1.1079	0.9639	1.0378	0.9878	1.0342	1.1498		114	4.0153	4.8754	4.1675	4.3423	4.3042	4.4603	4.497	4.5889	4.3983	4.7063	4.0673	4.0695	4.2758	4.9292	3.7603	4.1762	4.3324	4.3014	4.7711	4.2257
1.01415	0.03992	4.3419	0.300639		115	1.0268	1.0589	1.0258	1.0085	0.9562	1.0127	0.99	0.9788	1.0407	0.9862	0.9623	1.0866	0.9417	1.0224	0.9971	1.0864	1.0064	1.0001	1.0486	1.0467		115	4.4289	4.5899	4.1111	4.7156	4.1101	4.3509	4.4774	4.5509	4.2928	4.5337	3.8582	4.3445	4.275	4.9118	3.9419	4.2761	4.1035	4.1088	4.901	3.956
1.01564	0.0562882	4.34819	0.27413		116	1.1375	0.9333	0.9849	0.969	0.9274	1.0718	1.0184	1.0161	0.9671	0.9784	0.9782	1.002	1.1136	0.9792	1.0257	1.0462	1.0186	1.0257	1.0199	1.0998		116	4.3941	4.5632	4.1431	4.2927	4.0967	4.6624	4.4191	4.3759	4.1145	4.553	4.1077	4.0237	4.5166	5.0989	4.0642	4.315	4.3323	4.2071	4.6681	4.0155
1.02876	0.0390457	4.35161	0.197706		117	1.0786	1.0188	1.061	0.9542	1.036	0.9946	1.0742	0.9922	1.0619	1.0077	1.0418	1.0312	1.0843	1.0388	1.0656	0.9419	1.0256	0.9982	1.0476	1.021		117	4.4579	4.3402	4.3158	4.3578	4.0849	4.5471	4.6831	4.1884	4.2056	4.5197	4.1153	4.3688	4.4525	4.6654	4.0129	4.4144	4.1122	4.3771	4.6151	4.1979
1.01035	0.0391682	4.32358	0.321571		118	1.0312	0.9926	1.0634	0.9503	1.034	0.9592	1.0025	0.9438	1.0153	1.0003	1.0097	1.0842	1.0241	0.9845	0.977	1.0097	0.9719	1.0606	1.0372	1.0555		118	4.47	4.3355	4.4316	4.3546	4.1906	4.6112	4.4519	4.3523	4.022	4.9798	3.9702	4.0657	4.3035	4.378	3.8675	4.2427	4.4103	4.177	5.0732	3.7841
1.01784	0.0429384	4.29766	0.299583		119	1.0443	1.1003	1.0759	0.9583	1.0045	1.1198	0.9798	0.9801	0.984	1.0335	1.0095	0.9705	1.0106	1.0113	1.0126	1.0253	0.9684	1.0093	1.0135	1.0453		119	4.1386	4.4655	3.9421	4.4207	3.9178	4.5329	4.6418	4.6375	3.9532	4.5514	3.8762	4.2483	4.0638	4.7834	4.1004	4.2381	4.4431	4.729	4.3798	3.8896
1.02697	0.055227	4.39116	0.222017		120	1.0768	1.138	0.9659	0.9672	1.0492	0.984	1.0263	1.1309	0.951	1.067	1.0162	0.9508	1.0072	1.0427	1.0689	0.9666	1.0054	1.0058	1.0475	1.072		120	4.4771	4.7136	4.1048	4.4555	4.3738	4.5208	4.3621	4.5355	4.3025	4.6888	4.0721	4.137	4.1659	4.676	4.2636	4.3092	4.5941	4.1402	4.7546	4.176
1.01775	0.0491943	4.34603	0.262578		121	1.0999	1.0187	1.0314	0.9845	1.0309	1.0195	1.0089	0.9049	1.0437	1.1013	1.0059	1.0556	0.9966	1.0385	0.9654	0.9755	1.0268	1.0041	1.0922	0.9506		121	4.448	4.5017	4.1014	4.3872	4.4999	4.7981	4.4802	4.455	4.2129	4.6202	4.1325	3.8929	4.0715	4.7443	4.0684	4.1319	4.2827	4.3175	4.7386	4.0358
1.00864	0.0276221	4.40453	0.34351		122	1.0332	1.0147	1.0182	0.9385	0.9834	1.022	1.0022	1.0212	1.0233	1.0322	1.0009	0.9879	1.0231	1.0363	1.027	0.9466	0.9927	1.0325	1.0044	1.0325		122	4.6813	4.44	4.0841	4.8809	4.1925	4.6401	4.4194	4.1547	4.2122	4.9609	3.8909	3.9731	4.0384	4.984	4.3759	4.694	4.4213	4.2135	4.7931	4.0402
1.01161	0.0516227	4.39387	0.271848		123	1.0297	1.1311	1.0239	0.9232	0.9511	0.9859	1.042	1.0629	0.9722	0.9947	1.0108	0.9774	1.0867	1.0279	0.96	0.9513	0.9806	1.064	1.0471	1.0098		123	4.2821	4.5693	4.2563	4.4926	4.1104	4.563	4.4697	4.7058	4.5204	4.6696	3.9935	4.0707	4.0809	4.8353	3.9282	4.4517	4.4183	4.4841	4.8224	4.153
1.02633	0.035453	4.34108	0.313568		124	1.0333	1.0293	1.0662	0.9616	1.0359	1.0528	1.0566	1.0386	0.9759	1.0833	1.0379	1.0034	1.0595	0.9882	1.0193	0.9976	1.0769	0.9663	1.0146	1.0294		124	4.5213	4.754	4.1925	4.6071	4.1703	4.4701	4.4441	4.7921	4.3539	4.6809	4.0439	3.8229	4.2128	4.7414	4.0035	4.0576	4.1354	4.5037	4.5648	3.7493
1.01985	0.0498799	4.43273	0.336563		125	1.075	1.0762	1.0089	0.9361	0.9831	0.9708	0.9558	0.9999	0.9814	1.0079	1.0294	1.017	1.0604	0.9674	1.1146	1.0343	0.9749	1.0479	1.0581	1.0979		125	4.4305	4.6873	4.0925	4.5163	4.3093	4.9553	4.3475	4.4904	4.5387	4.8857	3.9614	3.5674	4.5476	4.7581	4.0733	4.3881	4.4188	4.6115	4.8325	4.2425
1.01875	0.0609401	4.41145	0.290897		126	0.9677	1.0197	0.9567	0.8864	1.1334	1.1258	0.9864	0.9961	0.9255	1.046	0.983	1.0178	1.0295	1.0204	1.0616	1.0986	1.0471	1.0099	1.0406	1.0227		126	4.075	4.7738	4.474	4.5415	4.2483	4.5861	4.6464	4.5685	4.2147	4.8125	4.0494	3.964	4.14	4.9136	4.1252	4.1327	4.483	4.5439	4.7511	4.1853
1.01002	0.055438	4.39801	0.245694		127	1.1455	0.9784	0.9931	0.922	1.0111	1.0039	0.966	1.0169	1.0146	0.9625	0.9581	0.9358	1.0343	1.0732	1.0618	1.0232	1.0539	0.9406	1.071	1.0345		127	4.4334	4.7703	4.1857	4.4664	4.2832	4.4241	4.2924	4.6704	4.1747	4.9166	4.1848	4.2074	4.3108	4.2681	4.0694	4.507	4.4347	4.1763	4.8982	4.2862
1.02242	0.0445575	4.42217	0.34615		128	1.0733	0.9938	1.0032	0.9529	1.0868	1.0572	1.0351	1.0194	1.0397	1.0258	0.9953	0.9989	1.051	1.0579	1.0822	0.9695	0.9936	0.9806	0.9423	1.0898		128	4.7538	4.6099	4.0371	4.2778	4.4692	4.9327	4.3228	4.4331	4.4978	4.6566	4.0868	3.9383	4.1224	5.0894	4.1338	4.1212	4.3431	4.6202	5.0067	3.9907
1.03042	0.0550539	4.38572	0.318238		129	1.0002	1.0828	0.9734	1.037	1.029	1.0488	0.9666	1.0575	1.0245	0.9937	0.9869	0.9913	1.1541	1.0193	0.9591	1.0773	1.0629	0.9901	1.0029	1.151		129	4.3951	4.5788	4.613	4.387	4.3437	4.5984	4.5989	4.1867	4.3126	4.5871	3.8226	3.8877	4.5451	4.9936	3.8243	4.0813	4.5987	4.3297	4.8371	4.1931
1.02589	0.0322645	4.38855	0.276156		130	1.0301	0.9971	1.0227	1.0546	1.1019	1.0519	1.034	1.0262	0.9951	0.988	1.0417	0.9595	1.0258	1.0644	1.0445	1.0176	1.038	1.0389	1.0012	0.9845		130	4.4269	4.6137	4.4505	4.2438	4.178	4.2416	4.3337	4.758	4.4127	4.7659	4.1102	4.0267	4.275	4.4642	3.9516	4.1795	4.4825	5.0213	4.6924	4.1427
1.01848	0.0499348	4.41288	0.226523		131	0.9701	1.1532	1.0062	1.0052	1.0047	0.9808	1.0356	1.0516	0.9404	1.0904	0.9909	0.9751	0.9707	1.0719	1.0257	0.982	1.0395	1.0573	0.9867	1.0315		131	4.3719	4.649	4.2126	4.6127	4.4023	4.528	4.6327	4.3936	4.3273	4.2702	4.0756	4.2005	4.5177	4.9385	4.1165	4.4609	4.454	4.2959	4.7117	4.0861
1.01512	0.0340509	4.41987	0.344611		132	1.0289	1.0706	1.023	0.9788	1.0507	1.0165	0.9578	1.0593	0.9813	1.0704	0.9638	1.0016	1.0439	0.98	1.0122	0.9989	0.9966	0.9991	1.0253	1.0438		132	4.5637	4.7727	4.1895	4.248	4.1519	4.4789	4.9217	4.1585	4.3804	4.7834	3.9294	3.9199	4.6034	4.8611	3.9578	4.3937	4.4247	4.2235	5.1362	4.2989
1.02075	0.042135	4.39884	0.201038		133	1.0064	1.012	1.0744	0.965	1.076	1.0328	0.9534	0.9972	1.0564	1.0273	1.019	1.0114	1.0682	1.0747	1.0668	0.9499	1.045	0.9534	1.0024	1.0234		133	4.5796	4.6527	4.362	4.3147	4.0841	4.2763	4.437	4.3211	4.4087	4.5644	3.9528	4.3173	4.7327	4.6961	4.3156	4.4666	4.4977	4.3367	4.5218	4.1389
1.02202	0.0395556	4.44494	0.229718		134	1.0309	1.1097	1.0186	0.9715	1.0903	1.0263	0.9976	1.0159	0.9511	1.0179	1.0438	0.9672	1.0313	1.0142	0.9975	1.0134	1.0042	1.0217	1.0881	1.0291		134	4.4007	4.7995	4.4898	4.7166	4.2949	4.9109	4.4289	4.4194	4.2688	4.6722	4.1459	4.4063	4.2075	4.4216	4.2785	4.3794	4.4158	4.4156	4.7956	4.0309
1.0065	0.0491464	4.37412	0.291613		135	1.0606	1.0313	0.9655	0.9641	1.0625	1.0608	1.0236	0.9732	0.9676	1.0618	1.0067	0.8823	1.022	1.03	1.0099	0.9774	0.9616	0.9702	1.0125	1.0863		135	4.33	4.8543	4.5407	4.7305	4.0118	4.6509	4.2698	4.3869	4.4572	4.7362	4.0853	3.8736	4.3395	4.8046	4.1205	4.3829	4.325	4.1555	4.5176	3.9095
1.02153	0.0381706	4.45344	0.22187		136	1.0422	1.0197	1.0833	1.0645	0.9604	0.9815	1.0438	1.0513	1.0162	0.9985	0.9983	1.0175	1.0141	1.0278	0.9737	1.102	1.0204	0.9573	1.0472	1.011		136	4.6524	4.4746	4.4418	4.4318	4.2835	4.4032	4.394	4.3822	4.4394	5.0372	4.1185	4.4774	4.5021	4.7559	4.0954	4.452	4.3156	4.3506	4.7927	4.2685
0.995175	0.0454371	4.3646	0.243764		137	1.0839	1.0433	1.0492	0.9369	0.9724	0.9613	0.9546	0.9581	0.947	1.0463	0.9838	1.0115	1.0842	0.9674	0.9585	1.0163	1.0125	0.9628	0.967	0.9865		137	4.4368	4.5826	4.2712	4.369	4.3944	4.6115	4.356	4.0836	4.2622	4.8801	3.9922	4.0871	4.1397	4.4758	4.2795	4.6812	4.5587	4.5273	4.3854	3.9177
1.0023	0.0418401	4.32329	0.152106		138	0.9998	1.0098	0.9522	1.0285	0.906	1.0092	1.0348	1.0339	1.0353	1.0038	0.9661	0.9436	1.0309	1.0364	1.0373	0.9301	1.0573	1.0087	0.9873	1.035		138	4.4326	4.5669	4.4048	4.3974	4.0491	4.1824	4.4106	4.3656	4.3244	4.5297	4.3392	4.0992	4.4968	4.3038	4.0113	4.334	4.2958	4.275	4.4411	4.2061
1.00592	0.0364893	4.38365	0.271038		139	0.98	0.9718	1.049	1.0146	0.9639	1.0433	1.0252	0.9884	1.0461	1.0336	1.0212	1.0568	1.0037	1.0123	0.9364	0.9569	1.06	0.9684	1.0102	0.9767		139	4.6864	4.7369	4.2518	4.1801	4.2241	4.3243	4.4306	4.4121	4.2744	4.6274	3.9223	3.9645	4.4126	4.8577	4.2734	4.4481	4.8879	4.2558	4.4527	4.0499
1.01217	0.0416616	4.44454	0.33114		140	1.0558	1.075	1.0223	1.0074	1.0632	1.0541	1.0432	1.0094	1.0334	1.0253	0.9682	0.9172	0.9725	0.9959	0.976	1.0581	0.9927	0.9657	1.0369	0.9711		140	5.3011	4.5589	4.4855	4.3794	4.2108	4.3736	4.7941	4.9215	4.1842	4.8607	3.9341	4.3177	4.0707	4.3593	4.3818	4.5668	4.4809	4.3915	4.3471	3.971
1.00788	0.0447952	4.36156	0.224575		141	1.0272	1.0279	1.0366	0.9584	0.963	0.9723	0.9423	1.0028	1.0398	0.9743	1.0297	1.0837	1.0876	1.0805	0.9714	0.999	1.0423	0.9618	0.9748	0.9822		141	4.4544	4.6438	4.3887	4.26	3.8897	4.4565	4.3621	4.337	4.3043	4.3208	3.9773	4.209	4.559	4.692	4.3033	4.8218	4.4609	4.3596	4.3475	4.0835
1.00403	0.051866	4.43606	0.227917		142	1.0255	0.9665	1.0473	1.0072	0.88	1.0731	0.9912	1.0378	1.0471	0.9816	1.0643	0.9344	1.073	0.9728	1.0118	1.006	1.0315	0.9365	0.9527	1.0403		142	4.9309	4.9582	4.6487	4.2195	4.549	4.404	4.543	4.2839	4.2524	4.7156	4.172	4.1806	4.3377	4.397	4.4623	4.3279	4.3729	4.2826	4.4224	4.2605
0.994045	0.0500277	4.41186	0.297639		143	0.9985	1.0217	0.9629	0.9846	0.9392	1.019	0.9975	0.966	0.9442	1.0536	1.0201	1.0603	1.0207	1.1129	0.9172	0.9064	0.988	1.0178	0.9603	0.99		143	4.4125	5.3514	4.4492	4.3986	4.2723	4.3028	4.606	4.2246	4.3391	4.5165	3.9829	4.2314	4.0649	4.7673	4.2764	4.4073	4.6347	4.6247	4.1649	4.2096
0.995745	0.0316176	4.40104	0.278667		144	0.9465	1.023	1.013	0.9914	0.9818	1.0544	0.9414	0.9717	1.0113	1.0209	1.0181	1.0553	1.0024	1.0027	1.0045	0.9571	0.999	0.9861	0.964	0.9703		144	4.4787	5.2257	4.3238	4.088	4.5575	4.1771	4.5326	4.3002	4.555	4.5148	4.1939	4.0847	4.3575	4.4786	4.6607	4.5447	4.5196	4.3606	4.1382	3.9289
1.00192	0.0516162	4.43054	0.395667		145	0.9508	1.0589	0.963	1.0578	1.0513	0.9294	0.9953	1.0363	1.0518	0.9981	0.9879	1.0209	1.0353	1.0812	0.8803	0.9435	0.9964	0.9599	1.014	1.0263		145	4.6386	5.8074	4.2652	4.2466	4.1048	4.2152	4.3794	4.6334	4.6147	4.4877	4.0111	4.3001	4.1641	4.7617	4.2492	4.599	4.6431	4.326	4.1391	4.0244
1.0044	0.0503019	4.43029	0.507343		146	0.9451	1.0626	0.9776	1.0185	1.0649	0.9677	1.0343	1.0293	1.0756	0.9881	0.9991	0.893	1.0915	1.0649	0.984	0.9817	0.9762	0.9816	0.9553	0.9969		146	4.8754	6.3337	4.657	4.2842	4.0366	4.0907	4.3054	4.1719	4.248	4.4064	3.9884	4.1835	4.5897	4.2361	4.3115	4.6149	4.6708	4.1712	4.3277	4.1028
0.98904	0.0272083	4.47588	0.423248		147	0.9399	1.0362	0.9903	1.0024	1.004	1.0193	0.9646	0.9934	0.9965	0.963	1.0047	0.9613	1.0248	0.9975	1.0066	0.9905	0.9979	0.9733	0.9868	0.9278		147	4.7183	5.9743	4.6594	4.0979	4.2101	4.2382	4.5101	4.3669	4.2645	4.5464	4.1076	3.9845	4.3066	4.5291	4.7594	4.3087	4.5989	4.7331	4.4947	4.1089
0.9977	0.0468907	4.48736	0.458964		148	0.9301	0.9646	0.9887	1.0303	1.0539	1.0401	0.9686	1.0177	0.9341	0.9882	1.045	1.067	1.0542	1.0425	0.9588	0.9051	0.9749	0.9686	1.028	0.9936		148	4.8296	6.2028	4.1391	4.2318	4.4176	3.9797	4.4237	4.2613	4.435	4.5809	4.1154	4.1071	4.7177	4.5899	4.6722	4.3843	4.4514	4.3344	4.489	4.3843
0.997705	0.0331625	4.53837	0.558197		149	0.988	0.9442	0.9484	0.9943	0.9774	1.0323	1.0619	1.0019	0.9875	1.0434	1.0124	0.9651	1.0046	1.011	0.9832	0.9422	0.9888	1.0441	1.02	1.0034		149	4.8842	6.6549	4.2708	4.3716	4.0172	3.9829	4.5655	4.3576	4.5804	4.6881	4.1137	4.1353	4.2804	4.7748	4.4789	4.6389	4.7124	4.565	4.3276	4.3672
1.00524	0.0358401	4.46928	0.398176		150	0.9812	0.973	0.9667	1.0022	0.9793	1.0317	0.9536	1.0131	1.0125	0.9647	1.026	1.007	1.0251	1.1024	1.0117	0.9898	0.992	0.9831	1.0688	1.0208		150	4.6239	5.8929	4.3786	4.0596	4.0453	4.3528	4.4936	4.6102	4.6584	4.4861	4.1253	4.3406	4.14	4.5111	4.4448	4.6843	4.7536	4.1185	4.2947	4.3713
0.99368	0.039774	4.55641	0.529939		151	1.0005	0.979	0.9831	0.9461	0.9317	1.0002	0.9432	0.9854	0.989	1.0021	0.9671	1.0449	1.0121	0.9439	1.0167	0.9749	1.0324	0.979	1.0774	1.0649		151	4.7907	6.4501	4.6656	3.9318	4.7709	4.1746	4.5379	4.2842	4.4757	4.5574	4.0256	4.8752	4.2994	5.0045	4.4495	4.3648	4.4569	4.3936	4.596	4.0237
1.00191	0.0460555	4.61768	0.58016		152	0.9462	0.9648	0.9624	1.1075	1.013	0.9685	1.0108	1.0117	0.9601	1.0063	1.0121	0.9955	0.9607	0.9668	0.9445	0.9913	1.0878	1.0596	1.0522	1.0164		152	4.456	6.8844	4.5229	4.1255	4.7373	4.1527	4.8097	4.5853	4.4153	4.5712	4.3407	4.4218	4.1129	4.6035	4.6579	4.5208	4.4648	4.4514	5.0726	4.447
0.990305	0.0435287	4.46484	0.444405		153	0.9849	1.0003	1.0261	1.0292	1.0528	1.0815	0.9649	0.8971	1.0189	0.9791	0.981	0.9049	0.9824	1.0053	0.9756	0.9865	0.9638	0.9717	0.9732	1.0269		153	4.6504	6.1286	4.5906	4.1535	4.2801	4.253	4.3517	4.4446	4.4856	4.5215	4.136	4.1961	4.3884	4.3331	4.6315	4.0601	4.6416	4.5267	4.5999	3.9237
0.997865	0.0427242	4.48885	0.645264		154	0.9673	1.0286	0.917	0.9708	0.9685	1.0216	1.0072	0.9734	1.0453	1.0335	1.0128	0.9335	1.0097	1.026	0.9434	1.0049	0.9755	1.0915	0.9831	1.0437		154	4.6957	7.1224	4.3301	4.0692	4.1704	4.2113	4.3281	4.4976	4.6075	4.4908	4.3049	4.1703	4.1244	4.6878	4.1886	4.4023	4.4635	4.2614	4.3539	4.2968
1.00531	0.0480776	4.52376	0.547341		155	1.0386	0.9824	0.9844	0.9588	0.9643	1.0778	1.047	0.989	1.0278	1.0301	0.9188	0.9389	1.0501	1.0493	1.0342	0.9928	0.9254	0.9866	1.0788	1.031		155	4.5243	6.6103	4.5235	4.4938	4.3466	4.0254	4.5042	4.7688	4.8095	4.4837	4.26	3.9899	4.1472	4.5026	4.3761	4.5824	4.6907	4.2477	4.5964	3.9921
1.01021	0.0439921	4.52064	0.706414		156	0.9722	1.0296	0.9342	0.9867	1.0263	1.0206	0.9616	1.011	1.1389	1.0684	0.994	0.958	1.004	1.0481	1.022	0.9899	0.9879	1.0202	1.0271	1.0035		156	5.1181	7.1323	4.6152	4.2126	4.7559	4.0128	4.4667	4.4085	4.7163	4.6206	4.0429	3.878	3.9264	4.8074	4.5593	4.2067	4.338	3.9621	4.6463	3.9867
0.988595	0.0449417	4.5186	0.443982		157	0.9554	1.0373	0.8706	1.0129	0.9537	1.0005	0.9666	0.9992	0.9805	1.0241	0.9293	0.9721	1.0134	1.0256	1.0541	0.9974	1.0269	0.9629	1.0435	0.9459		157	4.8899	6.161	4.759	3.9556	4.5111	4.3289	4.2148	4.4702	4.4395	4.5683	4.262	4.3298	4.0771	4.6883	4.5382	4.5631	4.4968	4.4152	4.377	4.3263
0.999375	0.0383985	4.4873	0.518129		158	0.9954	1.0174	0.92	0.9558	1.0388	0.9583	1.0207	1.0012	1.027	1.0199	1.0175	1.0451	1.0662	0.9454	0.9546	1.0024	0.9633	1.0153	0.9901	1.0331		158	4.9068	6.3136	4.502	4.1398	4.7703	4.0306	4.3352	4.7435	4.4517	4.1448	4.1884	3.9096	4.0124	4.3922	4.2545	4.3009	4.7954	4.4129	4.8067	4.3347
0.99772	0.0337547	4.55143	0.578055		159	1.0359	0.9676	0.9359	1.0109	1.0225	0.9649	1.0308	1.0012	1.022	0.9927	1.0062	0.9407	0.9908	0.9528	0.9601	1.0221	1.0307	1.0024	1.0097	1.0545		159	4.7868	6.6413	4.5623	4.2745	4.6726	4.214	4.2338	4.5621	4.7864	4.6852	4.2688	3.7362	4.1432	4.4372	4.7429	4.7547	4.5091	3.8729	4.7737	4.3708
0.99403	0.0476405	4.52035	0.531192		160	0.9879	1.0016	0.9678	0.9747	1.0108	1.0026	0.9526	1.0021	0.9594	1.061	0.9975	1.011	0.9837	0.9163	1.0167	0.994	0.9563	0.9579	1.1495	0.9772		160	4.8444	6.4753	4.3666	4.1498	4.5806	4.2048	4.4546	4.6074	4.3868	4.6389	4.3815	4.6866	4.0034	4.45	4.1871	4.0403	4.427	4.3789	5.0361	4.1068
0.98105	0.0326865	4.52395	0.647857		161	0.992	0.9468	0.9979	0.9909	0.9888	0.994	1.0033	0.9813	0.9232	0.9817	1.0111	0.92	0.9677	0.9474	0.9484	0.9893	1.0207	1.0092	1.0489	0.9584		161	4.8801	7.0679	4.8109	4.2919	4.3298	3.778	4.468	4.4416	4.1728	4.5508	4.2944	4.4674	4.1139	4.5959	4.4653	4.4529	4.4755	4.0606	4.4704	4.291
1.01023	0.0424181	4.50597	0.485219		162	1.035	1.0029	1.0016	0.9896	1.0067	1.0709	0.9811	0.9775	0.9705	1.038	1.0403	1.0265	0.9952	0.9132	1.0172	1.0082	0.9932	0.9807	1.1218	1.0344		162	4.6709	6.2939	4.4425	3.9828	4.4994	4.1664	4.5273	4.9445	4.3415	4.3856	4.086	4.403	4.2929	4.3119	4.5553	4.5403	4.8725	4.2575	4.42	4.1253
1.00999	0.0526564	4.45298	0.307274		163	1.0015	1.0725	0.9662	0.9472	0.9921	1.0246	1.017	0.9809	1.0386	1.0214	0.9978	1.1481	1.0427	1.0534	0.9558	0.9189	0.9584	0.9799	1.0689	1.0139		163	4.6249	5.2438	4.8768	4.2639	3.874	4.2338	4.4048	4.2855	4.8832	4.4527	4.4661	4.385	4.3544	4.2788	4.3009	4.7056	4.4717	4.0941	4.6071	4.2525
0.996075	0.0508586	4.42018	0.300565		164	0.9503	1.0166	1.0029	1.0306	0.9148	1.0711	1.0006	1.0442	0.9685	0.9944	0.963	1.0127	1.0181	0.9458	0.9388	1.0229	0.9811	0.9255	1.1244	0.9952		164	4.6447	5.2766	4.8227	4.2417	4.4563	4.4708	4.0622	4.4973	4.3507	4.2743	4.2687	3.9122	4.1564	4.1257	4.5566	4.5387	4.6535	4.3234	4.5242	4.2468
0.997915	0.0417742	4.45805	0.270988		165	0.9546	1.03	0.9486	1.0237	1.0006	0.9985	0.9367	1.0375	1.0514	1.0234	0.9702	1.0288	1.0035	0.9145	0.9556	0.9724	0.9797	1.0371	1.0267	1.0648		165	4.5298	5.2514	4.7743	4.2945	4.3247	3.9903	4.5025	4.5492	4.4435	4.455	4.4371	4.2964	4.173	4.5644	4.3223	4.7458	4.3437	4.2108	4.6902	4.2621
1.024	0.0487405	4.48801	0.284487		166	1.0627	1.0794	1.0039	1.0612	1.0174	0.9802	0.9797	1.0844	1.0437	1.0531	1.0673	0.9796	1.0277	1.1264	0.9851	1.0101	0.9648	0.9386	1.0432	0.9715		166	4.85	5.0164	4.9023	4.1515	4.4742	4.0716	4.1123	4.6237	4.8616	4.4909	4.3419	4.5024	4.2571	4.3325	4.5442	4.7923	4.441	4.241	4.5852	4.168
1.02567	0.0539997	4.37771	0.289635		167	1.0682	1.0553	0.9883	1.0474	1.0991	1.1064	1.0238	0.9909	1.0008	1.0785	0.9596	0.9896	0.9978	1.1448	0.9925	0.9504	1.0095	1.0168	1.0465	0.9473		167	4.7866	4.9659	4.5729	4.2612	4.2685	3.9361	4.333	4.8202	4.3361	4.4723	4.2216	4.4611	3.8283	4.1645	4.3379	4.7111	4.3758	4.1289	4.4336	4.1385
1.01875	0.0535999	4.43849	0.145263		168	0.9763	1.0657	1.0794	0.986	0.8894	1.0061	0.9697	1.0347	0.9572	1.0455	1.0123	1.0386	1.0322	1.0418	1.0797	0.9629	0.9761	1.1138	1.0383	1.0693		168	4.4901	4.5095	4.4864	4.3674	4.3883	4.3538	4.5699	4.4413	4.3411	4.5896	4.2967	4.5075	4.2665	4.3444	4.2939	4.7582	4.4396	4.4732	4.6895	4.1629
1.02256	0.0472831	4.4465	0.208052		169	0.9627	1.0787	1.0204	0.9996	1.0789	1.0238	1.0295	1.043	0.9742	1.0492	1.0161	1.0525	0.9466	1.0063	1.0306	0.9351	0.9963	1.0142	1.1289	1.0646		169	4.6854	4.7696	4.743	4.285	4.7284	4.341	4.5309	4.4136	4.3599	4.2716	4.1579	4.449	4.1342	4.6324	4.312	4.5174	4.3564	4.1161	4.6795	4.4467
1.01066	0.0373153	4.41381	0.266511		170	1.0092	0.9277	0.9558	1.0222	1.0495	1.0395	0.9615	0.9919	0.9978	1.0052	0.9909	0.9885	1.0862	1.043	1.0079	1.0318	1.0058	1.0365	1.0586	1.0038		170	4.7271	4.5643	4.4119	4.3204	5.2113	4.2191	4.2954	4.2796	4.2138	4.3602	4.3724	4.024	4.326	4.1628	4.4486	4.3597	4.5691	4.3105	4.8422	4.2577
0.99963	0.0623455	4.28462	0.299791		171	1.0063	1.0285	0.8622	1.0102	0.9822	1.0994	1.0116	0.9755	0.9435	1.0232	0.932	0.9915	1.0435	1.0973	0.9883	0.9134	0.9356	1.0004	1.0589	1.0891		171	4.6729	4.5084	4.327	4.1546	4.4243	3.8228	4.2402	4.4574	4.3358	4.239	4.5754	4.0068	4.0657	3.9541	4.3636	4.0959	4.6214	3.8427	4.9734	4.011
1.02863	0.0485467	4.33161	0.222882		172	0.928	0.9957	0.971	1.0483	1.0167	1.0213	1.0276	1.0725	1.0464	1.0193	1.0154	1.141	1.0466	1.0886	1.0418	1.0479	1.0128	0.959	1.0856	0.9871		172	4.4711	4.2054	4.7811	4.5199	4.1671	4.2009	4.0725	4.366	4.4905	4.4225	4.3374	4.0372	3.9487	4.3358	4.3855	4.2928	4.1616	4.7224	4.5853	4.1285
1.02404	0.0470959	4.41918	0.27565		173	0.9804	1.0462	0.9065	0.9857	0.9815	1.0397	1.014	1.0399	0.9753	1.0368	1.1046	1.0672	1.0332	1.1072	1.0066	1.0415	0.9806	1.0286	1.0513	1.0541		173	4.9542	4.5344	4.6085	4.3222	4.09	4.4336	4.0769	4.1816	4.0273	4.864	4.2817	4.2142	4.5136	4.5485	4.3341	4.2018	4.5583	4.2928	4.9559	4.3899
1.01514	0.053946	4.3498	0.267727		174	0.9826	1.0724	0.9755	1.0149	0.9875	0.978	0.9934	0.9588	0.9509	1.0797	0.9384	1.0585	0.9533	1.0084	1.0369	1.0588	1.0218	1.0101	1.148	1.0748		174	4.3883	4.0461	4.2529	4.2429	4.9461	4.1321	4.108	4.2555	4.313	4.5552	4.4526	4.3744	4.1577	4.2365	4.8787	4.3007	4.2708	4.0305	4.8582	4.1957
1.01561	0.0311357	4.41985	0.20113		175	1.0059	0.9707	1.0407	1.0131	0.9861	1.0326	1.0037	1.0089	1.0161	1.0179	0.9815	0.998	1.025	0.981	0.9935	1.0792	1.0359	1.0048	1.096	1.0217		175	4.686	4.221	4.5748	4.4251	4.8515	4.3618	4.3827	4.3804	4.661	4.3056	4.4759	4.4042	4.1934	4.1453	4.1869	4.2697	4.6426	4.1347	4.5558	4.5386
1.02011	0.0480634	4.44436	0.214193		176	1.0159	0.9912	0.9554	0.9083	1.0164	1.0317	1.0148	1.0521	0.9967	1.063	0.9603	1.0455	1.0291	1.0762	0.9843	1.0456	0.9733	1.0888	1.0809	1.0728		176	4.631	4.3717	4.676	4.3276	4.3476	4.3908	4.5061	4.1742	4.4705	4.5655	4.3202	4.3043	4.2038	4.4617	4.4171	5.0139	4.6098	4.0118	4.6055	4.4781
1.02366	0.0463766	4.46348	0.238415		177	1.0399	0.9782	1.0548	0.9839	1.056	1.0352	1.001	0.9705	1.0935	1.0193	1.0009	1.0703	1.0331	0.9233	1.0099	0.9657	1.0086	1.0978	1.087	1.0444		177	4.6385	4.3891	4.883	4.3789	4.5639	4.7323	4.5433	4.7939	4.4377	4.5258	4.4171	4.5271	4.153	4.2445	4.3239	4.5438	4.5291	3.8688	4.625	4.1509
1.01693	0.0474752	4.40696	0.301838		178	1.0026	1.094	1.0468	1.0489	1.056	0.9592	0.9802	0.9809	0.9732	1.0418	1.0071	1.0296	1.0087	1.0398	1.0235	0.8902	1.0769	1.0699	0.9815	1.0278		178	4.9668	4.4132	4.7772	4.1924	4.4285	4.8338	4.2433	4.3362	4.2215	4.7662	4.3877	4.253	3.8634	4.4731	4.6529	4.3524	4.712	4.136	4.2501	3.8796
1.0254	0.055944	4.41209	0.243355		179	0.9446	0.9943	0.9762	1.0869	0.9705	0.9656	1.0366	0.9718	1.0394	1.0651	0.9538	0.9997	1.0197	1.0655	1.0413	1.0016	1.1633	1.0478	1.0919	1.0725		179	4.7503	4.0627	4.7558	4.3103	4.7043	4.2279	4.2974	4.4795	4.4356	4.4063	4.3474	4.7832	4.1035	4.0281	4.4034	4.332	4.3613	4.2323	4.8533	4.3672
1.00344	0.0603903	4.47123	0.17053		180	1.0212	0.9524	0.9284	0.9668	0.9437	1.0295	0.9612	0.9502	0.9502	0.9811	1.0524	1.0702	1.0513	0.9647	0.9377	0.9878	1.1379	1.0717	1.0993	1.0111		180	4.5924	4.4927	4.6464	4.2726	4.3335	4.2483	4.3194	4.5285	4.4248	4.5797	4.4576	4.3349	4.4753	4.4441	4.4561	4.6799	4.7615	4.4113	4.8044	4.1611
1.02321	0.0648449	4.46776	0.212586		181	1.0321	1.0061	0.9702	1.0013	0.9631	0.91	1.0176	1.058	0.9954	0.9977	0.9697	0.9869	0.9479	1.1033	1.0851	1.0287	1.018	1.1767	1.0654	1.1311		181	4.7822	4.6799	4.7162	4.5468	4.6432	4.1779	4.424	4.5052	4.2086	4.5619	4.3245	4.2966	4.229	4.1498	4.5736	4.7045	4.5163	4.3316	4.7705	4.2129
1.04096	0.0678863	4.36781	0.245393		182	1.0451	1.0556	1.0646	0.9468	1.0126	1.0198	1.0069	1.0026	1.0152	1.0441	0.9649	0.9539	1.0432	0.9991	1.0198	1.101	1.1857	1.2182	1.0833	1.0367		182	4.8365	4.2323	4.5299	4.2298	4.3443	4.2059	4.1651	4.1114	4.2484	4.7246	4.2958	4.2793	3.994	3.9894	4.6083	4.5067	4.6846	4.3454	4.6993	4.3253
1.03112	0.0690228	4.39082	0.278905		183	0.9617	0.9172	1.0102	1.0381	0.9302	0.9548	1.0232	1.041	1.0669	1.0169	0.9682	1.0059	1.0792	1.0166	1.0501	1.0797	1.2151	1.1198	1.0425	1.085		183	4.6368	4.0761	4.6768	4.1431	4.439	4.4493	4.2583	4.568	4.1269	4.5804	4.236	4.4653	4.1068	4.184	4.1527	4.7175	4.5329	4.1624	5.1469	4.1572
1.05082	0.0783184	4.45925	0.270593		184	0.9691	0.9902	1.0781	1.0513	0.9677	1.0001	0.9849	1.0052	1.0588	1.0539	0.9651	1.0319	1.0349	1.0277	1.0408	1.1046	1.2673	1.2202	1.0971	1.0676		184	4.8288	4.1536	4.4443	4.1713	4.5019	4.5941	4.4836	4.3455	4.7632	4.7075	4.3959	3.9562	4.2509	4.4274	4.2305	4.6391	4.4904	4.5011	5.113	4.1868
1.03226	0.066701	4.33229	0.281604		185	0.9781	1.0548	0.9518	1.0708	0.9697	1.0027	0.9644	1.021	0.9879	0.9956	1.0191	0.9798	1.0008	1.073	1.0846	1.0307	1.2474	1.0626	1.0985	1.052		185	4.6433	4.2196	4.527	4.3038	4.4135	4.3963	4.4328	4.0384	4.0876	4.2159	4.1267	4.0152	3.8785	3.9286	4.6257	4.6375	4.9948	4.4022	4.5185	4.2398
1.03983	0.0839101	4.47089	0.276087		186	0.9661	1.0319	1.0134	1.0043	0.98	1.1073	1.0176	0.9782	0.9537	1.0767	0.9795	0.9748	1.0445	0.9398	1.0299	1.2533	1.2169	1.1406	1.0458	1.0424		186	4.7663	4.2478	4.7487	4.7378	4.5418	4.5737	4.1941	4.1885	4.3868	4.6745	4.3619	4.2775	4.1888	4.0224	4.8724	4.7104	4.8964	4.2416	4.6652	4.1211
1.05496	0.0990004	4.45417	0.272902		187	0.9623	1.062	1.0018	1.0284	0.9911	0.9985	1.0256	1.0089	1.0743	1.0261	0.9816	1.0344	1.0386	1.0208	0.9958	1.1717	1.2873	1.341	1.0076	1.0413		187	4.3731	4.5155	4.5964	4.2421	4.599	4.1438	4.5889	4.3103	4.4649	4.6863	4.2959	4.231	4.1415	4.4077	4.4721	4.8559	4.9417	4.2127	4.9984	4.0062
1.02816	0.0831564	4.4933	0.232434		188	0.9478	1.0399	0.9979	0.9879	0.9747	0.9573	0.9932	1.0105	0.9991	0.9973	0.9928	0.9556	0.9441	1.0007	1.0552	1.118	1.1601	1.2833	1.0986	1.0491		188	4.7533	4.1172	4.7925	4.4412	4.7874	4.2003	4.464	4.7521	4.4909	4.4177	4.585	4.5369	4.0932	4.5758	4.278	4.4442	4.8785	4.6315	4.4155	4.2108
1.05348	0.117904	4.50902	0.316202		189	1.1248	1.0558	0.9774	0.9716	0.985	1.0729	1.0047	0.9398	1.0461	0.9943	0.9402	1.0997	0.9432	1.1528	1.0131	1.2377	1.0509	1.4329	1.0513	0.9755		189	4.7131	4.294	4.6131	4.5743	4.2079	4.6931	4.3806	4.5972	4.4407	4.9801	4.2847	4.2085	4.1607	4.1332	4.3331	4.6909	4.9433	4.9644	5.0114	3.9561
1.06239	0.0910072	4.46733	0.279514		190	1.017	1.024	1.0206	1.1272	1.0273	1.011	1.0645	1.0448	0.9441	1.0144	0.9864	1.0076	0.9944	1.012	1.0849	1.196	1.2739	1.2788	1.087	1.0319		190	4.6835	4.0407	4.6313	4.2277	4.8262	4.5885	4.4498	4.5203	4.7682	4.4747	4.2666	4.0498	4.1388	4.4422	4.1219	4.8269	4.7658	4.6352	4.7936	4.0949
1.0295	0.0834219	4.45194	0.292476		191	0.9242	1.0429	0.9363	0.9835	0.9793	0.9988	1.0354	0.9971	1.0443	0.9783	0.9803	0.9853	1.0052	1.0229	1.0311	1.1836	1.2253	1.1783	1.1112	0.9467		191	4.8666	4.2563	4.6955	4.1785	4.6529	4.3815	4.1302	4.2007	4.6232	4.7004	4.5976	4.3434	4.1402	4.4941	4.0619	4.5104	4.8922	4.196	5.0105	4.1068
1.03377	0.0791493	4.45526	0.254327		192	0.9686	1.0566	1.0414	0.9616	0.9865	0.9361	0.9992	1.0524	1.0186	1.0309	0.9694	0.9809	0.99	1.0666	1.038	1.2025	1.225	1.1611	1.0198	0.9702		192	4.7781	4.1397	4.711	4.509	4.7201	4.2894	4.6254	4.3563	4.4845	4.5674	4.3867	4.0177	4.1223	4.0202	4.5957	4.6849	4.6313	4.3353	4.8556	4.2746
1.04789	0.0892714	4.4212	0.299555		193	1.0318	1.1249	1.0515	1.0103	1.0375	0.9744	1.0581	0.9996	0.9739	0.9578	0.9934	1.0511	0.9853	1.0294	1.0029	1.1632	1.2514	1.2745	1.0156	0.9711		193	4.972	4.3034	4.6743	4.477	4.8797	4.6418	4.3062	4.0832	4.29	4.4987	3.9824	4.3077	3.9772	4.105	4.4769	4.6958	4.7656	4.3807	4.6046	4.0017
1.04742	0.0876515	4.50197	0.279716		194	0.9906	1.0038	0.9953	1.078	0.9881	0.9918	1.0394	1.0128	0.9688	1.049	0.9924	1.0747	1.0691	0.9948	0.9897	1.1958	1.1696	1.3172	1.0337	0.9938		194	5.0029	4.2835	4.5284	4.1687	4.5928	4.1739	4.6062	4.2737	4.6074	4.5358	4.2674	4.8432	3.9788	4.1871	4.7759	4.7986	4.6945	4.4905	4.8548	4.3754
1.01684	0.0665275	4.42924	0.245348		195	1.0587	1.0657	0.9767	0.9711	0.9871	1.043	0.9548	1.0004	1.019	0.9884	0.964	0.9017	0.9701	0.9521	1.0276	1.1803	1.0721	1.1214	1.0928	0.9898		195	4.1597	4.5023	4.7172	4.5772	4.8403	4.3741	4.2732	4.2161	4.4414	4.6334	4.2761	4.128	4.1223	4.18	4.4886	4.5985	4.8686	4.2932	4.7323	4.1624
1.03992	0.102907	4.44279	0.25379		196	0.9546	1.1347	0.9801	0.9806	1.0276	1.0319	1.0342	0.9981	0.9937	1.044	0.9988	0.9527	0.9386	0.9508	0.9958	1.3301	1.2302	1.19	1.0071	1.0247		196	4.6573	4.2829	4.6611	4.4426	4.365	4.1532	4.4607	4.4874	4.7125	4.3961	4.478	4.0948	4.2579	4.1206	4.178	4.9976	4.6033	4.7331	4.6892	4.0845
1.05859	0.119514	4.50725	0.240946		197	0.9538	1.0553	0.9899	1.0309	1.1235	0.9356	1.0009	1.0335	1.0186	1.0429	0.9444	1.0425	0.9254	1.043	1.0583	1.2438	1.2288	1.4229	1.0682	1.0096		197	4.9299	4.2035	4.4045	4.3254	4.5048	4.5213	4.5585	4.3611	4.4064	4.4936	4.5717	4.1163	4.1557	4.3268	4.7633	5.0145	4.7014	4.6252	4.7473	4.4138
1.04699	0.119566	4.48834	0.27345		198	1.0252	1.0427	0.9672	0.9612	0.9842	1.0491	1.0107	1.0335	0.971	0.9439	1.0238	1.0518	0.9126	0.9716	0.9955	1.2721	1.2343	1.3954	1.0201	1.074		198	4.6398	4.8118	4.3503	4.3369	4.3714	4.4042	4.4021	4.7087	4.6603	4.4349	4.4758	4.3733	3.9641	4.2403	4.2943	5.143	4.7118	4.8425	4.5009	4.1004
1.06218	0.126455	4.46592	0.269827		199	0.9258	1.0996	1.0303	0.9565	1.0564	1.0606	1.0141	1.0088	1.0827	1.032	1.0474	1.0142	0.9378	0.9518	0.9833	1.3247	1.2818	1.3909	1.0092	1.0357		199	4.5427	4.2005	4.9925	4.4443	4.6416	4.2344	4.2642	4.448	4.3892	4.5055	4.1901	3.8878	4.3636	4.2286	4.498	4.7571	4.639	4.8337	4.8687	4.3888
1.07458	0.109437	4.51651	0.265128		200	1.0916	1.1068	1.0352	1.058	0.9896	1.1034	1.0468	1.0077	1.0151	1.0084	0.958	1.1322	0.9552	1.0092	0.9921	1.3348	1.2319	1.3309	1.0236	1.0611		200	4.5894	4.2868	4.6287	4.3944	4.6003	4.8099	4.3366	4.4363	4.1513	4.6844	4.6119	4.1019	4.1038	4.4439	4.5918	5.0599	4.7285	4.7734	4.8046	4.1924
1.04255	0.131513	4.48446	0.241543		201	1.0005	0.9081	0.9578	1.0186	1.0275	1.0932	0.9743	0.9977	0.9985	0.9875	1.0031	0.9267	0.9749	1.0084	1.0093	1.2231	1.1564	1.5106	1.0314	1.0434		201	4.6428	4.4158	4.8476	4.564	4.865	4.4648	4.4652	4.3457	4.4939	4.4699	4.3446	4.0237	4.1689	4.1056	4.3531	4.5784	4.665	4.8623	4.7278	4.285
1.05489	0.0739485	4.39734	0.278506		202	1.0555	1.0309	1.0359	1.0822	1.073	0.9728	1.0378	1.0674	1.0235	0.982	0.9651	1.004	1.0527	0.9751	0.9999	1.1784	1.2149	1.1965	1.0176	1.1327		202	4.5734	4.2694	4.9217	4.3329	4.3096	4.5059	4.2698	4.5686	4.2045	4.4297	4.5227	4.2775	3.9186	4.0041	4.09	4.6651	4.8144	4.3683	4.8268	4.0738
1.0616	0.0929205	4.54415	0.328621		203	1.0631	1.1029	1.0073	1.0893	1.0762	0.9467	1.0451	0.9799	1.0532	1.0699	0.9371	0.9623	1.0135	1.0844	0.9578	1.1993	1.2046	1.3021	1.0386	1.0987		203	4.734	4.7626	4.8821	4.5104	4.8679	4.3891	4.535	4.3989	4.7403	4.5767	4.4068	4.0738	4.1279	4.1702	4.4805	5.2972	4.9941	4.4835	4.4812	3.9708
1.07328	0.104483	4.49411	0.254733		204	0.9712	1.1069	1.0397	1.0802	1.026	1.0342	0.9386	0.9837	1.172	1.0521	1.0615	1.0677	1.0164	0.963	1.01	1.252	1.2741	1.3159	1.0877	1.0128		204	4.8684	4.4221	4.6	4.5008	4.7404	4.3206	4.3238	4.6382	4.4699	4.611	4.4686	4.1389	3.958	4.186	4.3398	4.6417	4.8473	4.853	4.7142	4.2395
1.08302	0.111412	4.38065	0.244909		205	1.017	0.9928	1.0243	1.1026	1.0055	1.0344	0.985	1.0393	1.1859	1.1302	1.0078	1.0239	1.0537	1.0086	1.0314	1.3383	1.2005	1.3777	1.032	1.0695		205	4.7381	4.1766	4.4792	4.2007	4.1657	4.4423	4.2446	4.3166	4.2072	4.6909	4.4489	4.0759	4.0472	4.1225	4.7525	4.5974	4.593	4.6116	4.6412	4.0609
1.06331	0.100194	4.39182	0.273116		206	1.0725	1.012	0.9274	1.0964	1.0092	0.9674	0.9834	1.0195	1.0382	1.045	0.9942	1.0112	1.0012	1.0408	1.0444	1.2679	1.2777	1.2761	1.1016	1.08		206	4.715	4.2958	4.7164	4.3509	4.0225	4.3946	4.2562	4.1569	4.2172	4.5621	4.4503	4.3722	3.9763	3.997	4.3303	4.7685	4.841	4.4895	4.7995	4.1243
1.05987	0.109662	4.3768	0.314423		207	1.099	1.1039	1.0087	0.9912	0.9871	0.955	0.9926	1.0592	1.0546	1.0082	1.0131	1.033	0.9641	1.0114	0.961	1.2753	1.3532	1.2485	1.0623	1.016		207	4.5216	4.1759	4.7324	4.2277	4.4915	3.9982	4.4151	4.5363	3.981	4.9861	4.3232	4.1184	4.7233	3.7974	4.2482	4.7822	4.6034	4.1858	4.6277	4.0606
1.07356	0.116297	4.53253	0.266794		208	0.9565	1.0501	0.9551	1.0629	0.956	1.0189	1.0189	1.05	1.1274	1.1605	1.0454	0.9744	1.0547	0.9347	1.0522	1.324	1.2807	1.3209	1.0695	1.0585		208	4.673	4.3893	4.6307	4.4121	4.7677	4.4315	4.2616	4.4612	4.4836	4.7813	4.3918	4.4265	4.2277	4.4842	4.401	4.8013	5.0494	4.5059	5.0813	3.9895
1.06788	0.114861	4.50923	0.307446		209	1.009	0.9632	1.0686	0.9825	0.9992	1.0506	0.9755	1.131	1.0751	1.1141	1.0302	1.0183	0.9454	1.0052	0.963	1.3637	1.2684	1.2848	1.0673	1.0424		209	4.9187	4.4516	4.7132	4.2674	4.1617	4.3615	4.3355	4.1946	4.534	4.8653	4.4264	4.2814	3.9182	4.4125	4.7607	5.2021	4.6415	4.5655	4.8437	4.3292
1.07693	0.115856	4.43281	0.282022		210	0.9236	1.0225	0.967	0.987	0.9929	0.9753	1.0349	1.1169	1.0726	1.0772	1.0465	1.0263	1.0244	1.1503	1.0241	1.2665	1.2808	1.3798	1.1288	1.0413		210	4.7325	4.3423	4.606	4.4694	4.4053	4.5572	4.1649	4.5247	4.3765	4.7953	4.4268	4.3879	3.8049	4.2769	4.349	4.436	4.7759	4.7226	4.7283	3.7739
1.08005	0.115444	4.41045	0.278715		211	1.0509	1.0583	0.9746	1.0542	0.9684	0.9503	1.0896	1.0839	1.087	1.1329	1.0232	1.036	0.959	1.0318	0.9763	1.3181	1.2653	1.3689	1.0712	1.1011		211	4.6576	4.3057	4.6153	4.2914	4.5329	4.4784	4.2613	4.3992	4.1357	4.7505	4.0984	4.0797	3.9292	4.0131	4.5414	4.9241	4.7684	4.5972	4.6076	4.2219
1.08922	0.114728	4.55014	0.295235		212	1.0133	0.9706	1.0607	1.0408	0.9867	1.0352	1.1549	1.1632	1.1297	1.1236	1.0302	0.9135	1.0229	1.0734	1.0639	1.2216	1.3649	1.3305	1.0939	0.991		212	4.5822	4.4207	4.6607	4.2953	4.7141	4.7998	4.3067	4.802	4.6117	4.7249	4.6144	4.1041	4.114	4.2393	4.369	5.0656	5.0376	4.3852	4.9384	4.2171
1.08628	0.132198	4.44848	0.280305		213	1.026	1.0935	1.0211	1.0513	0.9905	0.9696	1.0363	1.1834	1.2142	1.1788	1.0271	1.0224	0.966	1.0162	0.9457	1.3632	1.2267	1.4069	0.9974	0.9892		213	4.7163	4.3349	4.6469	4.4207	4.3173	4.1448	4.395	4.5676	4.1542	4.9534	4.6463	3.8228	4.2135	4.393	4.398	4.6547	4.5674	4.9185	4.5892	4.115
1.09217	0.125297	4.48671	0.245209		214	1.0189	1.0159	1.0394	1.0415	1.0158	0.9676	1.1255	1.178	1.1459	1.1589	1.0524	0.9822	1.0628	0.9975	1.0169	1.3223	1.2282	1.4499	1.0511	0.9726		214	4.8316	4.3294	4.3943	4.3985	4.6415	4.2768	4.337	4.7917	4.7589	4.6194	4.5049	3.8977	4.2851	4.3173	4.266	4.6231	4.745	4.857	4.5099	4.349
1.10241	0.0989616	4.43423	0.264941		215	1.0273	1.0887	1.0072	1.0174	1.0713	0.995	1.1693	1.1074	1.1552	1.1789	1.0634	0.9743	1.0328	1.1361	1.0367	1.2854	1.1853	1.3588	1.1167	1.0409		215	4.2805	4.2835	4.6472	4.4343	4.4382	4.141	4.2672	4.4162	4.4797	4.8195	4.5421	3.9553	4.1885	4.513	4.612	4.403	4.4793	4.9646	4.8296	3.9899
1.11008	0.119232	4.47321	0.206431		216	1.0507	1.0573	0.9604	1.0152	0.9751	1.063	1.2245	1.2026	1.2698	1.1675	1.0424	1.0069	1.0209	0.9782	1.0284	1.225	1.3881	1.2575	1.1132	1.1549		216	4.4708	4.2812	4.5909	4.3367	4.4013	4.5751	4.4956	4.0811	4.7273	4.6547	4.5135	4.432	3.9963	4.7835	4.4418	4.5499	4.7233	4.4471	4.6756	4.2864
1.11009	0.122207	4.5537	0.311037		217	1.0317	1.029	1.1903	1.0592	0.9888	1.0315	1.1591	1.1629	1.2314	1.2064	1.0488	0.9667	1.0195	1.009	0.9954	1.2938	1.3325	1.3505	1.1078	0.9875		217	4.5314	4.3911	4.5563	4.7532	4.6064	4.3815	4.7222	4.6083	5.0358	4.7899	4.5239	3.9944	3.9804	3.9573	4.3193	4.7197	4.8684	4.9957	4.7633	4.5756
1.1142	0.123023	4.52195	0.301092		218	1.0312	1.0565	1.0948	0.9653	1.0947	0.9541	1.1935	1.1743	1.1863	1.2786	1.1822	1.0374	1.0211	0.9816	0.9806	1.2952	1.353	1.2998	1.0484	1.0553		218	4.3949	4.1063	4.8689	4.2382	4.2293	4.3353	4.6546	4.8688	4.8133	4.6888	4.5666	4.7893	4.1804	4.434	4.1852	4.992	4.7495	4.6849	4.7014	3.9573
1.11913	0.115898	4.57728	0.238316		219	1.0227	1.0423	1.021	1.1153	1.1414	1.0521	1.1235	1.017	1.3188	1.1863	1.0976	1.0097	0.9931	1.0455	1.0881	1.2182	1.2742	1.4345	1.112	1.0694		219	4.6689	4.4921	4.7454	4.4417	4.7797	4.3186	4.6699	4.7004	4.8937	4.991	4.4633	4.2537	4.2112	4.2837	4.3867	4.6374	4.8806	4.7054	4.7549	4.2673
1.12404	0.141139	4.54652	0.312		220	1.0045	1.0546	1.0386	1.026	0.9866	1.0799	1.1656	1.2209	1.2793	1.1855	1.088	1.0106	0.9264	1.0798	0.9653	1.2642	1.3599	1.4799	1.1423	1.1229		220	5.2143	4.678	4.8962	4.2509	4.7875	4.5281	4.5409	4.6074	4.5449	4.7313	4.4239	3.9229	3.9704	4.5516	4.43	4.6994	4.7512	4.4138	4.8421	4.1457
1.12102	0.142859	4.51375	0.292165		221	0.9433	1.0607	1.0513	0.9926	0.9966	0.9968	1.2801	1.2571	1.2487	1.1195	1.1147	1.0271	1.0287	1.0689	0.9844	1.3801	1.2955	1.4333	1.0951	1.046		221	4.6263	4.3511	4.8662	4.3536	4.4206	4.558	4.299	4.5742	4.6567	5.0118	4.4413	4.0514	4.2899	4.1312	4.4269	4.9709	4.9477	4.4131	4.8055	4.0797
1.12462	0.131591	4.43202	0.304877		222	1.0284	1.0429	1.0539	1.1147	1.0392	1.0569	1.2623	1.2079	1.2511	1.1911	1.1049	1.0115	1.0266	1.0306	0.9652	1.2124	1.35	1.4613	1.0991	0.9824		222	4.4725	4.2127	4.6704	4.0971	4.2563	4.4148	4.8569	4.6366	4.3559	4.8806	4.4694	3.9111	4.1959	4.3377	3.9997	4.6293	4.8144	4.6577	4.787	3.9844
1.12727	0.125339	4.50004	0.21774		223	1.0344	1.0738	1.2028	1.0122	1.0172	1.0194	1.2279	1.3939	1.273	1.1077	1.0547	1.0241	1.0305	1.0556	1.0889	1.3457	1.287	1.238	1.0788	0.9798		223	4.5048	4.3199	4.7003	4.3301	4.3649	4.3788	4.6339	4.6646	4.2141	4.8442	4.4723	4.532	4.2108	4.2516	4.2346	4.8583	4.7685	4.698	4.6881	4.331
1.11669	0.160679	4.51358	0.354712		224	0.973	0.9243	1.1277	0.9691	0.9919	1.0258	1.2403	1.358	1.3412	1.1927	1.0448	1.0355	0.9919	1.0267	0.9686	1.3179	1.404	1.3584	1.034	1.0081		224	5.1312	4.0776	4.9315	4.2214	4.5119	4.5701	4.8301	4.5998	4.8027	4.8114	4.6663	3.8779	4.058	4.2078	4.3565	4.8607	4.7807	4.5683	4.4647	3.943
1.16094	0.137532	4.46814	0.246919		225	0.9737	1.1182	1.3028	1.0701	1.068	1.0073	1.1503	1.374	1.3397	1.1526	1.2162	1.039	1.0834	1.0361	1.0749	1.3086	1.3366	1.423	1.0848	1.0595		225	4.5549	4.1229	4.6243	4.1559	4.3064	4.1715	4.5379	4.7738	4.7737	4.5863	4.5793	4.1637	4.2449	4.3476	4.3083	4.9114	4.701	4.3261	4.8058	4.3672
1.12038	0.120553	4.49876	0.279917		226	0.9831	1.1502	1.056	1.0772	1.0496	0.9441	1.2574	1.2557	1.2374	1.1534	1.1401	1.1063	0.9903	0.9666	0.9899	1.2612	1.2353	1.3783	1.1236	1.052		226	4.6661	4.1803	4.8342	4.544	4.4268	4.3046	4.4263	4.5407	4.5387	4.7052	4.7138	3.7815	4.2767	4.1651	4.6135	5.0163	4.7296	4.4033	4.7539	4.3546
1.13291	0.1362	4.50177	0.309872		227	0.9552	1.1515	1.1476	1.0361	1.0798	0.9639	1.3403	1.298	1.2166	1.198	1.0645	1.007	0.9722	1.0527	1.0211	1.297	1.3921	1.2941	1.149	1.0215		227	4.4661	4.3714	5.0336	4.3648	4.3002	4.1252	4.7712	4.6603	4.59	4.7185	4.9215	4.2026	3.9218	4.1499	4.1063	4.6714	4.7785	4.622	4.8895	4.3706
1.13998	0.140985	4.48955	0.261439		228	0.9341	1.1953	1.2359	0.9802	1.0771	0.9933	1.2809	1.2154	1.3783	1.1934	1.1917	1.0389	0.9992	1.0354	1.0413	1.2444	1.3044	1.4026	1.0595	0.9984		228	4.6887	4.1825	4.7798	4.5528	4.6688	4.1641	4.5487	4.4158	4.7561	4.5877	4.4904	4.199	4.054	4.0174	4.3333	4.7298	4.9212	4.6221	4.7137	4.3651
1.12659	0.129358	4.49449	0.31266		229	0.9854	1.2016	1.1358	0.9827	1.032	0.9541	1.28	1.2377	1.2388	1.1766	1.1724	1.0244	1.0374	1.109	0.9942	1.3148	1.2113	1.4	1.068	0.9756		229	4.5792	4.1495	4.5886	4.1255	4.4951	4.4134	4.5307	4.8092	4.8166	4.618	4.4353	3.8656	4.0363	4.4335	4.4394	4.9424	5.0021	4.6956	4.8055	4.1084
1.18062	0.156165	4.5697	0.321468		230	0.9842	1.385	1.3391	1.097	1.0496	1.0509	1.3697	1.1691	1.4376	1.1439	1.2509	1.0458	0.9815	1.0904	1.0088	1.3577	1.3243	1.3768	1.0898	1.0603		230	4.6665	4.7429	4.755	4.3906	4.542	4.109	4.6443	4.6518	4.9196	4.807	4.6535	4.199	4.1293	4.3118	4.7155	5.0159	5.0172	4.3905	4.8729	3.8597
1.1506	0.131638	4.5467	0.254406		231	1.0021	1.1885	1.1978	0.9673	1.2328	1.1322	1.2509	1.2049	1.2975	1.1518	1.1379	0.9826	1.0706	1.0365	1.0485	1.2192	1.3745	1.4292	1.1291	0.958		231	4.7016	4.385	4.805	4.3798	4.9254	4.3445	4.7864	4.9156	4.6935	4.4895	4.7135	4.0781	4.2422	4.3056	4.2628	4.6769	4.7715	4.4787	4.7389	4.2394
1.1385	0.155634	4.60892	0.353539		232	1.0446	1.1282	1.2805	1.024	1.0141	0.9453	1.3346	1.3573	1.387	1.2141	1.1815	0.9613	0.9797	1.0028	1.0029	1.2514	1.3495	1.2916	1.0441	0.9756		232	4.7916	4.2751	4.8547	4.3691	4.4424	4.4492	4.6614	5.3124	5.0081	4.5155	4.7062	4.1698	4.3563	4.0579	4.0927	5.0269	5.0932	4.6207	4.9476	4.4277
1.1608	0.155935	4.46023	0.249675		233	0.9763	1.2937	1.2363	1.0214	1.0587	1.0781	1.3141	1.1526	1.3078	1.2118	1.1251	1.0998	1.0004	1.0341	1.0045	1.2575	1.493	1.4717	1.0794	0.9998		233	4.6237	4.6436	4.6676	4.2486	4.4608	4.288	4.3271	4.5362	4.3377	4.6437	4.6768	4.1822	4.2183	4.062	4.3421	4.8761	4.8967	4.5165	4.6267	4.0303
1.1718	0.141716	4.49073	0.308698		234	1.1123	1.3093	1.1582	1.0614	1.0299	1.0112	1.3039	1.395	1.3553	1.2152	1.196	1.0309	1.0421	1.07	1.0209	1.3338	1.2639	1.4236	1.0684	1.0347		234	4.7474	4.3866	4.6946	4.3529	4.8712	4.3771	4.5107	5.0356	4.4946	4.6998	4.5771	4.0306	3.9955	3.9407	4.2836	4.9404	4.6139	4.6688	4.4388	4.1546
1.16685	0.15806	4.55121	0.31465		235	0.9904	1.3314	1.2228	0.9878	1.2425	1.0696	1.2812	1.2699	1.2005	1.2694	1.0879	0.9636	1.0072	0.9978	0.9833	1.4381	1.3791	1.4243	1.1062	1.084		235	4.676	4.5136	4.7739	4.5383	4.5935	4.2487	4.6454	4.6656	4.9788	4.683	4.6353	3.7007	4.1751	4.3116	4.4484	4.8455	4.743	4.7711	4.9782	4.0985
1.17696	0.134396	4.55549	0.302571		236	1.1316	1.3924	1.2403	1.0493	1.1485	1.2193	1.288	1.2999	1.3266	1.1688	1.1089	1.0671	0.9963	1.0055	1.0013	1.2159	1.3462	1.3975	1.1376	0.9982		236	4.6113	4.5962	4.8662	4.348	4.3443	4.6959	4.7336	4.9975	4.5388	4.7732	4.4155	4.043	4.1472	4.1616	4.5706	4.9898	5.06	4.5607	4.5575	4.0989
1.18972	0.131738	4.56963	0.251589		237	1.1563	1.3249	1.1797	1.0726	1.1471	1.3021	1.1578	1.1779	1.3591	1.2775	1.1366	1.0773	1.0508	1.0838	0.9781	1.3264	1.4072	1.4328	1.0453	1.1011		237	4.7276	4.5222	4.4204	4.3868	4.7901	4.1087	4.4448	4.4967	4.5923	4.8973	4.6656	4.3501	4.1741	4.5637	4.3543	4.6204	4.943	4.9467	4.9719	4.4158
1.18642	0.135383	4.51081	0.334824		238	1.0241	1.2724	1.0999	1.1176	1.2288	1.3085	1.2998	1.2732	1.3024	1.2317	1.2174	1.046	0.9742	1.0011	1.0308	1.3443	1.3973	1.3794	1.0831	1.0964		238	4.9771	4.5111	4.9172	4.4305	4.3712	4.1577	4.5075	4.9429	4.6001	4.659	4.468	4.1245	3.9072	4.1341	4.5758	4.9595	4.9111	4.4744	4.6552	3.9321
1.19619	0.152101	4.59774	0.318676		239	1.0339	1.4114	1.146	1.1559	1.146	1.175	1.3857	1.2498	1.3632	1.2733	1.1429	1.0985	1.0068	1.0932	0.9398	1.2941	1.4036	1.4629	1.1319	1.0099		239	4.989	4.77	4.7613	4.2978	4.7352	4.633	4.5462	4.9098	4.7783	4.8685	4.6013	4.0979	3.8443	4.2142	4.5271	4.6193	5.0177	4.6188	4.9194	4.2058
1.17865	0.134925	4.50825	0.307717		240	1.1134	1.3233	1.2839	1.0998	1.2359	1.2704	1.3502	1.1741	1.1981	1.1781	1.1355	1.0459	0.9822	0.978	1.0095	1.3039	1.3693	1.4073	1.0337	1.0806		240	4.7548	4.6321	4.7598	4.4102	4.5938	4.4292	4.6125	5.1522	4.598	4.7453	4.6672	3.8185	4.026	4.0689	4.4569	4.5886	4.7577	4.3149	4.593	4.1854
1.20835	0.139921	4.66954	0.433677		241	1.1637	1.4763	1.2623	1.1739	1.2729	1.3173	1.3848	1.3279	1.1887	1.2165	1.1947	1.1308	1.0052	1.0124	0.9535	1.2891	1.2873	1.3748	1.0919	1.043		241	4.9136	4.7964	5.0063	4.4775	5.1087	4.6521	4.6343	4.69	5.0049	4.7654	4.3981	3.6836	4.1986	3.7822	5.0471	5.2034	5.121	4.7237	4.998	4.1859
1.20775	0.147275	4.64457	0.2656		242	1.0885	1.4844	1.3689	1.1372	1.4067	1.1813	1.2171	1.2217	1.3092	1.1216	1.1152	1.1573	1.0414	0.9765	1.0788	1.3939	1.3387	1.3809	1.1019	1.0338		242	4.44	5.0919	4.9093	4.5849	4.8339	4.5942	4.8542	4.6802	4.8616	4.8692	4.7008	4.6683	4.0955	4.3443	4.756	4.4329	4.9614	4.5163	4.5701	4.1263
1.20989	0.13488	4.64603	0.319973		243	1.1396	1.3927	1.2876	1.1453	1.2171	1.1511	1.2363	1.2971	1.3507	1.0616	1.1798	1.1979	0.9978	1.0111	1.1513	1.4265	1.4346	1.357	1.047	1.1156		243	4.9264	4.7339	4.6436	4.4219	4.9754	4.4534	4.6387	4.7649	4.9342	4.744	4.7092	4.0284	4.3753	4.0706	4.8825	4.6715	4.7825	4.7136	5.3059	4.1448
1.23633	0.145005	4.66102	0.292602		244	1.1174	1.4785	1.4645	1.1704	1.2074	1.254	1.434	1.2039	1.2895	1.1282	1.222	1.0987	1.0934	1.0494	1.0843	1.3972	1.3754	1.4119	1.0359	1.2106		244	4.9781	4.6884	4.9671	4.5749	4.9418	4.8137	4.4256	5.1805	4.7097	4.7459	4.6994	4.0772	4.2802	4.4293	4.5367	4.9626	4.6586	4.7993	4.6568	4.0947
1.23935	0.128074	4.63258	0.309		245	1.0897	1.4527	1.3956	1.1157	1.2903	1.172	1.3835	1.2467	1.3689	1.2227	1.1099	1.1225	1.1455	1.1088	1.1801	1.4601	1.3716	1.3061	1.1461	1.0984		245	4.9466	4.3427	4.9212	4.6794	4.7592	4.1196	4.4239	5.1157	4.4885	5.0149	4.7775	4.0516	4.2269	4.4991	4.9166	4.8898	4.8353	4.7468	4.5288	4.3675
1.23693	0.129927	4.66847	0.278425		246	1.0477	1.3294	1.4025	1.1269	1.266	1.0796	1.3724	1.2529	1.2998	1.2813	1.1681	1.2845	1.1875	1.0804	1.116	1.4219	1.4189	1.4063	1.0553	1.1412		246	4.5267	4.8977	5.1433	4.5811	5.2555	4.3193	4.4704	4.6541	4.4846	4.9162	4.7445	4.4037	4.3694	4.4617	4.6031	4.4892	5.0054	4.4935	5.0531	4.4969
1.26424	0.125237	4.67756	0.293385		247	1.1107	1.4452	1.4152	1.1798	1.3872	1.2114	1.3787	1.3423	1.3306	1.228	1.1481	1.2886	1.1902	0.9708	1.174	1.3086	1.4533	1.3376	1.1633	1.2213		247	4.9478	4.7183	4.959	4.4083	5.0458	4.7791	4.9524	5.0999	5.1242	4.397	4.4544	4.3197	4.3163	4.301	4.2243	4.705	4.7851	4.7542	4.7919	4.4675
1.27989	0.154024	4.6501	0.262291		248	1.134	1.3735	1.3452	1.1143	1.3155	1.2202	1.3011	1.3561	1.6396	1.1785	1.1409	1.3204	1.224	1.0739	1.1301	1.4445	1.4233	1.5454	1.1291	1.1882		248	4.5215	4.3311	4.9467	4.4672	4.7617	4.3902	4.8489	5.1189	4.6675	4.6676	4.4785	4.46	4.5357	4.5861	4.618	5.329	4.8574	4.5436	4.5723	4.3002
1.25311	0.1321	4.73036	0.30496		249	1.089	1.4825	1.2857	1.1008	1.2617	1.2294	1.2894	1.3798	1.2839	1.3073	1.1571	1.4377	1.2897	1.0826	1.003	1.2886	1.355	1.4275	1.0902	1.2214		249	4.5458	4.4198	5.2549	4.7294	5.4144	4.8015	4.7564	4.9921	4.5931	5.0396	4.4198	4.4531	4.3429	4.4698	4.3691	4.7968	5.0477	4.8839	4.7751	4.5019
1.27961	0.132937	4.7125	0.287393		250	1.2047	1.4235	1.4088	1.1864	1.4707	1.2442	1.2859	1.2889	1.2909	1.1267	1.1219	1.5078	1.3416	1.0445	1.2335	1.2588	1.3422	1.4907	1.1007	1.2199		250	4.835	4.7188	4.9956	4.3713	4.9125	4.5823	4.9177	4.6251	5.5691	4.4963	4.6625	4.8315	4.5961	4.305	4.9033	4.6132	4.8033	4.7109	4.5114	4.2891
1.26509	0.153848	4.68693	0.260973		251	1.0919	1.504	1.4296	1.2253	1.3528	1.0058	1.2374	1.3282	1.1948	1.1583	1.1845	1.4654	1.2153	1.1429	1.1543	1.272	1.2995	1.646	1.1419	1.2518		251	5.1438	4.7357	4.7753	4.4872	5.0992	4.1205	4.5087	5.0804	4.8073	4.7248	4.6387	4.5237	4.4986	4.5039	4.6508	4.6762	4.6258	4.715	5.0556	4.3674
1.28009	0.120325	4.716	0.249561		252	1.133	1.5667	1.2584	1.1756	1.3457	1.15	1.2358	1.2453	1.3584	1.2741	1.1357	1.3688	1.3762	1.2495	1.1503	1.4123	1.3482	1.4126	1.0979	1.3073		252	4.9915	4.9848	5.0898	4.555	4.7667	4.3636	4.5904	4.7287	4.6986	4.8032	4.601	4.4785	4.2787	4.3723	4.6073	5.1994	4.8416	4.7888	4.9667	4.6134
1.28095	0.14831	4.75668	0.232		253	1.1505	1.5857	1.3968	1.1629	1.297	1.1559	1.1851	1.2434	1.2019	1.2365	1.1021	1.4756	1.3486	1.0211	1.2313	1.4075	1.4148	1.5128	1.1699	1.3197		253	4.634	4.9918	4.7517	5.0054	5.0132	4.8444	4.6816	4.9123	4.5469	4.6245	4.4969	4.6111	4.5855	4.3838	4.6958	4.978	4.6614	4.4309	5.1832	5.1013
1.30117	0.131394	4.6759	0.207845		254	1.1466	1.5042	1.2383	1.2056	1.3752	1.2638	1.4084	1.3464	1.3661	1.1057	1.0633	1.4771	1.4354	1.1179	1.2647	1.2964	1.405	1.4091	1.1875	1.4067		254	4.9704	4.9305	4.6917	4.8358	4.4972	4.8025	4.7175	4.6978	4.5939	4.6726	4.7208	4.5352	4.4596	4.0908	4.6742	4.7568	4.5849	4.6965	5.0517	4.5377
1.29703	0.144211	4.6784	0.259467		255	1.1191	1.2867	1.522	1.2476	1.251	1.3079	1.2281	1.2762	1.2514	1.1851	1.1737	1.7656	1.1812	1.2242	1.234	1.3855	1.4179	1.3101	1.2234	1.3499		255	4.6307	4.5592	4.9268	4.7601	5.134	4.615	4.5492	4.8161	4.5694	4.9024	4.7314	4.3341	4.4458	4.1724	4.9698	5.0527	4.9515	4.3783	4.6406	4.4286
1.30691	0.115729	4.7541	0.265427		256	1.13	1.3591	1.2416	1.27	1.3781	1.3682	1.3308	1.423	1.2366	1.1778	1.1457	1.5825	1.2773	1.2542	1.2219	1.2957	1.2867	1.5125	1.2391	1.4075		256	4.8606	4.802	4.5873	4.4548	5.1	4.8864	4.7039	5.0873	4.7659	4.7031	4.6722	4.3088	4.4784	4.2102	4.9174	4.9125	5.0575	4.5443	5.1784	4.8511
1.2929	0.115362	4.77258	0.2693		257	1.159	1.5733	1.2118	1.3647	1.511	1.2451	1.2121	1.3746	1.4227	1.2204	1.1305	1.3208	1.257	1.2024	1.2656	1.3631	1.2327	1.3332	1.2721	1.186		257	5.1073	4.7412	5.1676	4.7054	4.8073	4.8625	4.4314	5.0534	4.7715	4.94	4.4931	4.7404	4.6438	4.1652	5.1703	5.0702	4.7224	4.4578	4.8558	4.5449
1.31787	0.126727	4.71763	0.253367		258	1.2145	1.4573	1.2888	1.3136	1.3363	1.1466	1.2342	1.4172	1.4871	1.2739	1.1657	1.4539	1.2806	1.1998	1.2005	1.5353	1.4395	1.5006	1.1522	1.2599		258	4.6943	4.9018	4.6267	4.9573	5.3908	4.798	4.4842	4.8403	5.1001	4.7518	4.5875	4.5496	4.4208	4.246	4.679	4.7577	4.8331	4.4879	4.6174	4.6284
1.30486	0.111601	4.75958	0.283492		259	1.1255	1.504	1.3068	1.3146	1.2929	1.318	1.2962	1.3401	1.3279	1.1584	1.1339	1.2921	1.4285	1.2924	1.2146	1.3578	1.4157	1.4836	1.1159	1.3782		259	4.7772	5.1514	5.1172	4.9894	5.1157	4.7329	4.3837	5.0085	4.7239	4.6156	4.6196	4.4582	4.9148	4.4256	5.0184	4.619	5.1884	4.5563	4.4396	4.3362
1.30834	0.130788	4.70296	0.255559		260	1.2296	1.5415	1.4489	1.3666	1.4655	1.4063	1.3275	1.3011	1.3692	1.2145	1.1319	1.2211	1.3279	1.1038	1.3746	1.2893	1.394	1.4381	1.1502	1.0651		260	4.6776	4.8632	4.7269	4.7834	4.8801	4.7885	4.456	4.803	4.9788	5.0331	4.5997	4.0341	4.5395	4.3946	4.8666	4.6982	4.6671	5.0242	4.9294	4.3152
1.32027	0.115473	4.71788	0.284994		261	1.1897	1.5689	1.3159	1.2797	1.4519	1.3184	1.3593	1.4294	1.1815	1.2563	1.1482	1.4916	1.2675	1.4231	1.2659	1.3475	1.2927	1.4256	1.1993	1.193		261	4.7214	4.9827	4.9036	4.5365	5.5024	4.5319	4.5938	4.8581	4.645	4.5708	4.7698	4.7438	4.7793	3.9754	4.6071	4.6761	4.771	4.6376	5.005	4.5462
1.3071	0.134611	4.63693	0.251905		262	1.1602	1.4639	1.462	1.227	1.5035	1.3884	1.1453	1.2823	1.3403	1.3123	1.1119	1.5126	1.4075	1.0585	1.2946	1.3992	1.3401	1.3612	1.1964	1.1749		262	4.5248	4.8971	4.9783	5.1234	4.5603	4.5399	4.3668	4.6566	4.7168	4.7763	4.8348	4.454	4.7129	4.3114	4.9963	4.6673	4.6182	4.2687	4.5435	4.1912
1.3167	0.111529	4.74791	0.24361		263	1.0922	1.2567	1.3305	1.2149	1.4029	1.4189	1.2076	1.3786	1.4409	1.2807	1.2333	1.5812	1.2924	1.2613	1.1969	1.4044	1.3604	1.4035	1.226	1.3508		263	4.6539	4.7481	5.2623	4.6716	4.9243	4.2908	4.6144	5.0036	5.1359	4.6783	4.6299	4.8091	4.4381	4.323	4.933	4.8588	4.8416	4.6696	4.8187	4.6531
1.30929	0.105223	4.71431	0.289043		264	1.1552	1.4364	1.4181	1.2481	1.4383	1.3613	1.2772	1.2656	1.3478	1.259	1.1357	1.4457	1.3073	1.14	1.2282	1.4031	1.4183	1.3385	1.1774	1.3846		264	5.0045	4.4614	4.606	5.0134	5.0875	4.4074	4.3824	4.9952	4.8301	4.7963	4.3984	4.9548	4.5549	4.1716	4.7119	4.6495	4.9442	4.3339	5.1681	4.8147
1.28912	0.127313	4.76531	0.276692		265	1.1824	1.3135	1.3841	1.1832	1.5921	1.3865	1.2763	1.2344	1.3716	1.1768	1.1895	1.278	1.4062	1.1364	1.2152	1.3149	1.2975	1.5133	1.0713	1.2591		265	4.6222	5.2329	4.9898	5.2376	5.0017	4.7961	4.6286	4.8362	4.645	4.6134	4.5649	4.6818	4.5831	4.2016	4.5925	4.9248	4.8177	4.9685	5.0796	4.2881
1.28183	0.123454	4.74632	0.265814		266	1.1483	1.4673	1.4074	1.2102	1.4001	1.1844	1.2214	1.3275	1.3323	1.2274	1.1348	1.5284	1.3255	1.177	1.2909	1.3957	1.2897	1.2828	1.0112	1.2743		266	4.6095	4.9072	5.2834	4.9024	5.0071	4.5448	4.8629	4.7579	4.8351	4.8931	4.5663	4.5696	4.4901	4.1705	4.966	4.9613	4.8579	4.8442	4.6468	4.2503
1.3599	0.139293	4.83608	0.2272		267	1.1805	1.3609	1.3365	1.3297	1.5387	1.4133	1.2889	1.4613	1.1859	1.222	1.2124	1.6376	1.3865	1.1729	1.3573	1.5634	1.4116	1.4985	1.1886	1.4514		267	4.9249	4.5772	4.8103	4.9558	5.2163	4.9432	4.7126	5.0286	4.787	4.7847	4.6532	5.0674	4.4661	4.3221	4.9144	4.9564	5.088	5.1024	4.7193	4.6918
1.30431	0.093919	4.77728	0.318148		268	1.1862	1.295	1.2831	1.2952	1.4323	1.3592	1.2933	1.4235	1.3589	1.2845	1.1856	1.3884	1.485	1.3416	1.1586	1.3415	1.3108	1.3119	1.1258	1.2259		268	5.0833	4.6398	4.8687	4.5937	5.1083	4.5002	4.726	5.0898	4.8288	5.0387	4.7227	4.1475	4.4946	4.3804	5.1993	5.0586	5.323	4.3879	4.8307	4.5236
1.34848	0.153555	4.79267	0.27363		269	1.1763	1.4811	1.318	1.2967	1.6043	1.3752	1.4632	1.401	1.3983	1.2314	1.1524	1.5038	1.4547	1.0737	1.2689	1.1814	1.3737	1.6606	1.2177	1.3373		269	5.0264	4.3369	4.8241	4.84	4.8924	4.4455	4.7339	4.7236	5.2256	4.8151	4.9042	4.766	4.7078	4.5087	4.8137	4.8497	5.2867	4.7214	5.1979	4.2338
1.34736	0.10456	4.84152	0.216919		270	1.1629	1.4959	1.3649	1.3405	1.4431	1.2306	1.4409	1.3359	1.3951	1.2772	1.209	1.4425	1.4488	1.252	1.3175	1.3002	1.5082	1.4632	1.2005	1.3183		270	4.7041	5.0687	4.9223	5.0259	5.0987	4.9038	4.8152	4.8664	4.6692	4.6865	4.6421	4.7884	4.7084	4.4183	4.7404	5.317	5.0314	4.7966	5.0805	4.5465
1.31957	0.125569	4.77219	0.346861		271	1.2205	1.4603	1.2384	1.2654	1.4078	1.2114	1.2908	1.3626	1.312	1.199	1.1863	1.335	1.7148	1.3067	1.2879	1.3355	1.3396	1.32	1.1458	1.4517		271	4.8665	4.4548	4.7676	4.5205	5.8231	5.0351	4.8626	4.7502	5.2123	4.5247	4.9345	4.4168	4.9271	4.3333	4.9397	4.7961	4.7015	4.6613	4.636	4.2802
1.33924	0.144351	4.80877	0.279983		272	1.1028	1.625	1.3731	1.2345	1.5462	1.2377	1.2476	1.4504	1.4158	1.3583	1.1545	1.4073	1.5403	1.1562	1.3517	1.3749	1.3971	1.4104	1.1501	1.2509		272	4.8007	5.3063	4.5782	5.1901	4.8951	4.5139	4.6885	4.6331	5.0601	5.0545	4.5585	4.7787	4.7813	4.105	4.8223	5.0294	4.8842	4.8142	5.1268	4.5545
1.33805	0.108488	4.76932	0.218484		273	1.1278	1.3628	1.4661	1.3081	1.2754	1.4923	1.3801	1.3137	1.3847	1.2093	1.1788	1.523	1.4382	1.4227	1.3136	1.2939	1.3972	1.3309	1.169	1.3733		273	5.1033	4.5724	4.9332	4.838	4.4308	4.6312	4.686	5.1425	4.8867	4.7937	4.601	4.9784	4.6695	4.2721	4.6703	4.8077	4.9305	4.6218	4.9519	4.8654
1.32483	0.116914	4.77869	0.188194		274	1.1625	1.4115	1.4546	1.1963	1.3561	1.2341	1.1686	1.4176	1.2967	1.3208	1.1953	1.356	1.5581	1.487	1.2064	1.2554	1.3497	1.4935	1.2741	1.3024		274	4.7348	4.8797	4.875	4.5611	5.0474	4.4211	4.6221	4.8255	5.0297	4.7734	4.642	4.6041	4.8543	4.8539	4.6852	4.5235	5.0952	4.8869	5.0068	4.6521
1.34356	0.128137	4.80164	0.255536		275	1.2763	1.4773	1.32	1.4135	1.3556	1.3911	1.3067	1.2988	1.5489	1.1588	1.1697	1.6584	1.3254	1.3613	1.2924	1.3052	1.4192	1.4318	1.1559	1.2049		275	4.783	5.088	4.7234	5.186	5.1403	4.6331	4.6486	4.7426	4.9985	4.4377	4.7006	5.0541	4.9512	4.3467	4.8681	4.7816	5.0595	4.4523	4.9953	4.4423
1.306	0.122395	4.81229	0.272784		276	1.1474	1.2467	1.3105	1.247	1.5828	1.4764	1.2024	1.3742	1.3772	1.3012	1.1529	1.3858	1.3777	1.2876	1.2865	1.435	1.2897	1.3915	1.1214	1.1261		276	5.122	4.2999	4.8199	4.5763	5.3262	4.8133	4.7344	5.033	4.8135	4.9505	4.6111	4.3549	4.6104	4.7059	5.1393	4.7208	5.0295	4.6969	5.2173	4.6708
1.36208	0.156623	4.77817	0.296722		277	1.182	1.4342	1.1365	1.3665	1.335	1.3298	1.3123	1.4044	1.5145	1.2143	1.2255	1.7172	1.571	1.2177	1.2829	1.3749	1.4796	1.5509	1.134	1.4583		277	4.8458	4.4733	5.2736	4.7962	5.202	4.6233	4.7804	5.5339	4.5363	4.5649	4.8769	4.894	4.6748	4.3557	4.9091	4.8012	4.8304	4.622	4.5886	4.381
1.34609	0.122152	4.8116	0.223642		278	1.0379	1.4381	1.2478	1.2844	1.4794	1.2626	1.3509	1.3598	1.3504	1.296	1.1925	1.5688	1.4545	1.4411	1.3365	1.4416	1.3461	1.4713	1.2043	1.3579		278	4.9818	4.9247	5.0811	5.2275	4.5588	4.7	4.5749	4.7027	4.6506	4.589	4.5971	5.2534	4.6626	4.6092	4.8354	4.7883	4.814	4.8261	5.1627	4.6922
1.33606	0.0971864	4.75945	0.173518		279	1.226	1.4621	1.375	1.2925	1.596	1.4397	1.2472	1.2662	1.3708	1.1619	1.2414	1.3188	1.3619	1.3915	1.2681	1.2801	1.3358	1.3897	1.3756	1.3209		279	5.1724	4.5689	4.9212	4.8121	4.758	4.5708	4.834	4.4529	4.8396	4.9101	4.7733	4.6897	4.78	4.7019	4.7748	4.9132	4.8915	4.4905	4.7946	4.5395
1.36989	0.155487	4.86285	0.262649		280	1.1845	1.4942	1.2953	1.2243	1.5124	1.3682	1.2287	1.3336	1.5051	1.2788	1.1484	1.5527	1.7776	1.3886	1.3135	1.4214	1.3351	1.4193	1.1524	1.4636		280	4.9079	4.5803	5.1761	4.7657	5.2911	4.9617	4.6031	4.9758	4.996	4.8197	4.8187	4.9226	5.1292	4.3016	5.1697	5.161	4.77	4.3979	4.8066	4.7022
1.3494	0.121032	4.7067	0.24461		281	1.2185	1.4861	1.4146	1.3345	1.5448	1.3417	1.2134	1.3048	1.2807	1.1792	1.2667	1.6264	1.4543	1.3004	1.2358	1.3421	1.4314	1.4751	1.278	1.2596		281	4.8541	4.8407	4.6695	4.7743	5.0377	4.5927	4.336	4.8807	4.4116	4.603	4.6868	4.7975	4.3475	4.5623	5.1074	5.0035	4.8063	4.4586	5.016	4.3478
1.36084	0.130786	4.83081	0.27674		282	1.2564	1.4049	1.3555	1.3334	1.5611	1.2394	1.2207	1.4173	1.3917	1.3515	1.2899	1.765	1.3851	1.347	1.2778	1.3572	1.4459	1.3828	1.1557	1.2785		282	5.3736	4.699	5.2648	4.8001	5.1032	4.63	4.7417	5.1157	4.9712	4.7627	4.7464	4.9103	4.5114	4.2532	4.9729	4.8743	4.945	4.4832	4.9524	4.5052
1.36289	0.135158	4.79218	0.250667		283	1.132	1.4055	1.3307	1.4079	1.4935	1.3867	1.2367	1.55	1.4134	1.3519	1.2463	1.6291	1.555	1.2053	1.1781	1.3678	1.3464	1.4729	1.2064	1.3422		283	5.2829	4.6209	5.0586	5.0099	5.0844	4.7597	4.737	5.1023	5.0576	4.8105	4.7966	4.6166	4.2793	4.5101	4.7492	4.7543	4.5099	4.5439	4.9035	4.6565
1.3076	0.112161	4.82554	0.240604		284	1.1219	1.5577	1.277	1.2729	1.334	1.3547	1.2526	1.2681	1.3677	1.2121	1.1819	1.2428	1.5805	1.2307	1.2341	1.3415	1.3804	1.3492	1.2442	1.3479		284	4.7336	5.0742	4.9348	5.0539	5.3942	4.8002	4.5654	4.9626	4.87	4.649	4.6142	4.6576	4.5745	4.4806	4.8777	5.2181	4.8064	4.7583	4.9568	4.5287
1.37722	0.185055	4.82939	0.285695		285	1.1231	1.5216	1.3145	1.3394	1.4057	1.3708	1.3251	1.4258	1.4452	1.2033	1.2172	1.9029	1.6255	1.2607	1.1552	1.4309	1.3855	1.4257	1.1289	1.5374		285	5.0805	5.0367	4.5356	4.8414	5.1022	4.4502	5.0027	4.8685	4.9456	4.8544	4.5538	5.4697	4.9857	4.4307	5.0107	4.8351	5.0265	4.6969	4.5239	4.337
1.37621	0.167125	4.87494	0.273593		286	1.1763	1.5808	1.4278	1.2744	1.5038	1.2302	1.3432	1.3879	1.3143	1.3077	1.3417	1.9087	1.531	1.3258	1.3778	1.2678	1.3687	1.3211	1.1283	1.4069		286	4.8445	5.0222	5.1786	4.8571	5.2052	4.7462	4.3558	4.8864	4.7446	4.8123	4.8473	4.4997	5.1776	4.3316	5.1896	4.7702	4.8938	4.7146	5.2312	5.1904
1.35424	0.145938	4.78972	0.252034		287	1.1928	1.5035	1.3799	1.2534	1.5519	1.3589	1.3149	1.3927	1.3118	1.1432	1.2503	1.67	1.5703	1.1645	1.2718	1.4576	1.3829	1.4628	1.206	1.2457		287	5.0436	4.6874	5.2769	4.6908	4.8036	4.7355	4.6487	5.161	4.7377	4.6997	4.7067	4.7057	4.9908	4.129	4.7935	4.7777	5.0642	4.7269	4.9618	4.4533
1.36266	0.163135	4.75042	0.238211		288	1.1784	1.6351	1.4444	1.2995	1.4135	1.399	1.3692	1.3076	1.1309	1.1364	1.1877	1.6144	1.6294	1.3173	1.2106	1.3581	1.469	1.4841	1.1656	1.503		288	4.7996	4.6798	5.2283	4.6286	4.9481	4.6276	4.6002	5.0213	4.6748	4.7062	4.5245	4.8162	5.1303	4.318	4.8776	5.0066	4.6238	4.5859	4.8466	4.3645
1.33474	0.102031	4.78509	0.268435		289	1.152	1.3507	1.3787	1.2855	1.3346	1.3971	1.2353	1.2978	1.3833	1.2523	1.1999	1.5154	1.4534	1.2668	1.3126	1.4847	1.4461	1.4242	1.1845	1.3398		289	4.9287	4.7084	5.0556	5.0016	5.0935	4.6701	4.7593	4.8715	4.9723	4.8487	4.5851	4.6126	4.9406	4.3919	4.5438	5.3343	4.9085	4.2298	4.8256	4.4199
1.35356	0.103714	4.74141	0.1857		290	1.2122	1.3232	1.44	1.2339	1.4493	1.3891	1.2397	1.347	1.2933	1.39	1.1494	1.5513	1.522	1.3982	1.31	1.4053	1.4271	1.3148	1.2665	1.409		290	4.4849	5.1365	5.1569	4.9645	4.7505	4.7718	4.5062	4.9312	4.6293	4.6679	4.7246	4.64	4.8856	4.586	4.7398	4.6007	4.6706	4.6421	4.663	4.6762
1.338	0.12736	4.72988	0.311609		291	1.1912	1.4245	1.4365	1.2886	1.5884	1.2918	1.2481	1.3154	1.4641	1.1997	1.1414	1.5478	1.4113	1.2875	1.2753	1.498	1.3403	1.3849	1.2615	1.1637		291	4.596	4.6747	4.8542	4.7326	5.6243	4.38	4.8372	4.9609	4.7426	4.6006	4.7115	4.5227	4.756	4.2001	4.523	4.9331	4.9186	4.7828	5.0323	4.2144
1.36554	0.111872	4.77057	0.291667		292	1.2134	1.3677	1.2204	1.3105	1.4893	1.3816	1.2932	1.3289	1.3063	1.2294	1.2102	1.5562	1.4477	1.522	1.2451	1.417	1.5093	1.4641	1.3501	1.4484		292	4.8363	4.8328	4.7931	4.5818	5.6702	4.669	4.6319	4.7788	4.958	4.7912	4.5625	4.2484	4.9289	4.7062	4.7445	5.191	4.6032	4.5919	4.8505	4.4411
1.33411	0.112525	4.74886	0.144073		293	1.1749	1.3723	1.4052	1.3286	1.4764	1.3099	1.2605	1.3111	1.1297	1.2546	1.1718	1.3923	1.5645	1.4468	1.2835	1.4465	1.3297	1.4237	1.2203	1.3799		293	4.7424	4.769	4.9055	4.6771	4.6525	4.8413	4.5368	5.0311	4.4413	4.7805	4.6485	4.8763	4.9037	4.5832	4.88	4.7242	4.8855	4.6739	4.6693	4.7551
1.34058	0.114065	4.77612	0.245519		294	1.2252	1.3379	1.3238	1.3854	1.28	1.3907	1.2038	1.3522	1.3147	1.2362	1.124	1.633	1.539	1.2532	1.3963	1.3353	1.3485	1.4472	1.3201	1.3651		294	4.9489	4.7795	4.8311	4.9498	5.0537	4.5442	4.4412	4.8222	4.7136	4.4572	4.704	5.2862	4.5062	4.5153	4.972	4.7435	4.9195	4.5698	5.1986	4.5659
1.3622	0.136472	4.76356	0.268274		295	1.1419	1.5798	1.4091	1.3425	1.48	1.2575	1.2638	1.4408	1.32	1.243	1.1646	1.5218	1.6254	1.2884	1.287	1.3673	1.4312	1.5398	1.2542	1.2859		295	4.6323	4.7502	4.9707	4.9264	5.3213	4.8856	4.6268	4.7977	4.6858	4.4367	4.8103	4.3379	4.6921	4.2179	4.7608	4.882	5.1881	4.5947	5.0857	4.6681
1.3308	0.114344	4.8485	0.216753		296	1.0492	1.4206	1.3507	1.2968	1.4933	1.425	1.3123	1.4487	1.4842	1.1898	1.1234	1.3893	1.3097	1.3644	1.3266	1.3495	1.212	1.3788	1.3715	1.3201		296	4.9403	4.8602	5.0885	5.1103	5.327	4.8524	4.6228	4.8503	4.9262	4.8526	4.6969	4.7785	4.8166	4.5447	4.9178	5.014	4.6738	4.7008	5.0306	4.3657
1.32729	0.139846	4.83354	0.235943		297	1.176	1.2289	1.2161	1.4059	1.4322	1.4131	1.4044	1.2994	1.3848	1.2016	1.1481	1.653	1.5782	1.2439	1.0988	1.2362	1.3155	1.3922	1.3331	1.3845		297	4.7992	4.3442	4.9057	4.7589	4.4709	4.7694	4.8649	4.7454	4.9815	4.7718	4.7959	5.029	5.3299	4.583	4.791	4.7999	5.1373	4.7027	5.252	4.8383
1.34599	0.113438	4.78905	0.267051		298	1.1923	1.5964	1.2752	1.3022	1.5242	1.3296	1.2557	1.3395	1.4592	1.1866	1.2453	1.4303	1.4779	1.4514	1.2309	1.2875	1.3508	1.3784	1.2501	1.3562		298	5.092	4.9212	5.2017	4.8256	5.1354	4.7011	4.9868	4.744	4.9887	4.582	4.858	4.1699	4.8658	4.294	4.7852	4.705	4.6861	4.6214	5.0703	4.5469
1.33032	0.100453	4.81325	0.267603		299	1.1636	1.3479	1.4992	1.2416	1.3328	1.3482	1.4186	1.3249	1.1963	1.3452	1.1508	1.4211	1.4624	1.2197	1.3324	1.3576	1.416	1.4185	1.2224	1.3872		299	4.6886	5.0726	5.0466	4.6251	5.1909	4.2807	4.9474	5.2141	4.4939	4.7903	4.6102	4.7532	4.9571	4.39	4.9888	4.8048	5.1078	4.6098	5.0397	4.6534
1.39225	0.132404	4.80361	0.247268		300	1.13	1.374	1.3168	1.2955	1.5036	1.3585	1.4395	1.4164	1.425	1.2359	1.1814	1.6149	1.5504	1.3027	1.4593	1.3129	1.4558	1.5528	1.3368	1.5828		300	5.0671	4.6309	4.8293	4.8568	5.4112	4.5384	4.651	4.6913	5.0113	4.6257	4.7168	4.9634	4.7374	4.5511	5.032	4.8467	4.8702	4.3351	5.1029	4.6036
1.34591	0.130755	4.85223	0.198523		301	1.2168	1.3414	1.4594	1.2912	1.3635	1.3351	1.289	1.4611	1.4736	1.1839	1.0894	1.3499	1.6381	1.2817	1.3609	1.401	1.4273	1.4447	1.1113	1.3988		301	4.9734	4.8117	5.0663	5.1432	5.1881	4.7184	4.4919	5.0741	4.8322	4.8472	4.5618	4.7338	4.9452	4.5649	4.8819	4.8349	4.9433	4.57	4.9489	4.9134
1.39277	0.121754	4.71172	0.164009		302	1.2568	1.3354	1.2399	1.4742	1.4363	1.5468	1.379	1.4411	1.4644	1.2372	1.182	1.5758	1.6272	1.4279	1.3739	1.3749	1.3467	1.5256	1.2699	1.3404		302	4.7039	4.7237	4.4928	4.7981	4.7504	4.6352	4.7878	4.8607	4.8992	4.7218	4.4802	4.8259	4.3194	4.6949	4.7533	4.7403	4.6746	4.6279	5.0976	4.6468
1.38156	0.117673	4.81485	0.22239		303	1.2389	1.5287	1.3796	1.4001	1.5307	1.3864	1.3091	1.3717	1.2764	1.3223	1.2778	1.4665	1.6005	1.5276	1.2998	1.3076	1.3261	1.5168	1.1443	1.4203		303	4.8818	4.562	4.9426	4.6957	5.1675	4.5476	4.8421	4.9072	4.5391	5.1306	4.8504	5.1261	4.7469	4.5915	5.1993	4.9052	4.5744	4.572	4.8758	4.6392
1.3587	0.123814	4.76702	0.209941		304	1.1619	1.4603	1.3766	1.1978	1.4742	1.4924	1.3198	1.3483	1.4391	1.1707	1.2369	1.4772	1.4059	1.4718	1.3502	1.3169	1.4417	1.4663	1.1017	1.4642		304	4.8613	4.4458	5.1433	4.8298	5.2908	4.5695	4.6647	4.7976	4.7479	4.58	4.5842	4.6492	4.7518	4.6605	4.6999	5.0381	4.7994	4.5202	4.7983	4.9081
1.37221	0.141973	4.80958	0.179934		305	1.2471	1.4414	1.2448	1.2193	1.5175	1.3064	1.3138	1.5257	1.3401	1.1518	1.2722	1.6158	1.5766	1.2883	1.3838	1.2988	1.3221	1.6631	1.2883	1.4274		305	4.9797	5.0217	5.0246	4.6082	5.2039	4.6997	4.5545	4.735	4.9002	4.8876	4.6456	4.7858	4.8121	4.7832	4.9485	4.9361	4.6595	4.5303	4.8553	4.6202
1.3454	0.140374	4.79492	0.214291		306	1.2102	1.358	1.3933	1.2546	1.4204	1.3794	1.2251	1.386	1.3051	1.2364	1.1994	1.6974	1.6141	1.3649	1.2082	1.3264	1.2075	1.4653	1.1902	1.466		306	4.9751	4.9346	5.2065	4.771	5.2652	4.7036	4.7096	4.6792	4.7421	4.7401	4.5823	4.8847	4.6606	4.666	4.6855	4.8272	4.4905	4.6634	5.1525	4.5587
