# Supplementary material for: Hypoxia controls plasma membrane targeting of polarity proteins by dynamic turnover of PI4P and PI(4,5)P2
Source: eLife. 2022 Jun 9;11:e79582. doi: 10.7554/eLife.79582 (PMC9242647; doi:10.7554/eLife.79582)
Supplement: Figure 1—source data 3. [file elife-79582-fig1-data3.xlsx]

## Sheet: Figure 1C
Figure 1 Souce Data 3
						1	2	3	4	5	6	7	8	9	10	11	12	13	14	15	16	17	18	19	20			1	2	3	4	5	6	7	8	9	10	11	12	13	14	15	16	17	18	19	20
P4MX2-GFP		Lgl-mCherry			P4MX2-GFP
AVG	STDEV	AVG	STDEV																								Lgl-mCherry
C2_PM/Cy	C2_PM/Cy	C1_PM/Cy	C1_PM/Cy		min	C2_PM/Cy	C2_PM/Cy	C2_PM/Cy	C2_PM/Cy	C2_PM/Cy	C2_PM/Cy	C2_PM/Cy	C2_PM/Cy	C2_PM/Cy	C2_PM/Cy	C2_PM/Cy	C2_PM/Cy	C2_PM/Cy	C2_PM/Cy	C2_PM/Cy	C2_PM/Cy	C2_PM/Cy	C2_PM/Cy	C2_PM/Cy	C2_PM/Cy		min	C1_PM/Cy	C1_PM/Cy	C1_PM/Cy	C1_PM/Cy	C1_PM/Cy	C1_PM/Cy	C1_PM/Cy	C1_PM/Cy	C1_PM/Cy	C1_PM/Cy	C1_PM/Cy	C1_PM/Cy	C1_PM/Cy	C1_PM/Cy	C1_PM/Cy	C1_PM/Cy	C1_PM/Cy	C1_PM/Cy	C1_PM/Cy	C1_PM/Cy
4.71147	0.735004	4.33686	0.825753		1	5.8743	5.1335	4.3657	3.7921	5.0728	4.6507	4.1185	4.3989	4.1374	5.6595	5.2591	5.3298	5.2962	4.0598	3.1598	5.1987	5.0981	3.5008	5.0239	5.0997		1	6.0751	5.0327	4.1203	3.6281	5.2063	4.4123	3.3226	4.4059	3.6854	5.5537	3.9379	5.0914	5.3216	4.1979	3.2821	4.4855	3.8905	2.9194	4.0062	4.1623
4.6191	0.737506	4.4542	0.6593		2	5.5762	4.7925	4.6323	3.7631	5.8926	4.2674	4.0552	4.7699	4.1891	4.9514	5.7005	4.861	4.9434	3.8718	3.4576	4.9959	4.7947	3.4831	5.5751	3.8092		2	5.6336	4.6715	4.6075	4.0731	5.5524	4.9704	3.9285	4.4645	3.6274	4.2935	3.866	5.0568	5.5114	3.5747	3.8203	4.4914	4.6828	3.3882	4.4168	4.4531
4.59334	0.658018	4.43789	0.720834		3	5.555	5.2091	4.1567	3.7814	4.9044	4.3223	4.2218	3.9733	4.0205	5.6511	4.7955	5.3861	4.9485	3.9661	3.724	4.9312	5.0247	3.8738	5.4666	3.9546		3	6.0363	4.3174	4.3274	3.6711	4.8027	5.1589	4.9364	4.3325	3.4632	4.5918	4.0902	5.5588	4.8351	3.2253	3.8899	4.0213	5.0928	3.4936	4.3673	4.5459
4.52712	0.63681	4.34371	0.666297		4	4.9169	5.0992	4.1159	4.0747	5.3999	4.5242	4.1532	4.2578	3.9988	5.7014	4.6064	5.1173	4.9891	4.0856	3.3788	4.7691	4.6653	3.555	5.3127	3.8211		4	5.2548	4.7637	4.0257	3.6692	4.8062	4.5315	4.5227	4.5804	3.8428	4.5062	3.3639	4.673	4.5468	3.5019	3.156	4.4791	4.3754	3.5166	5.6802	5.0781
4.46141	0.691754	4.09988	0.684699		5	5.0001	5.1178	4.32	3.7166	5.2795	4.4968	3.791	4.1879	4.1017	5.086	5.1606	4.301	4.4933	3.7405	2.7732	5.1536	4.6468	4.0583	5.6543	4.1491		5	5.6275	4.7755	3.5241	3.2567	4.4171	4.7829	3.5208	4.1157	3.2952	4.251	3.6823	4.1041	4.818	3.5025	3.3467	4.3813	4.2444	3.208	5.0946	4.0492
4.32572	0.714788	3.91723	0.728039		6	5.5317	4.7513	3.9699	3.7556	4.6129	4.6384	3.9736	4.0908	3.184	4.7346	4.838	3.9696	4.4298	3.7205	2.9739	5.1147	4.2284	3.8237	5.8464	4.3265		6	5.2252	4.2976	3.3548	3.1341	4.4135	4.9756	3.155	4.3917	2.9492	3.82	4.4931	3.7213	4.8365	3.4344	2.4895	4.1149	3.7079	3.3938	4.4846	3.952
4.36147	0.69324	3.78761	0.799469		7	5.0008	4.9055	4.7172	3.22	4.6698	4.4116	3.8833	4.3737	3.3159	3.517	5.1372	4.8832	4.7866	4.1839	2.7842	5.0643	4.47	4.6687	5.1465	4.09		7	4.4068	4.2486	3.0803	2.7104	3.6565	4.2004	3.4746	3.8407	3.1147	2.9359	3.6297	3.3725	5.4378	3.3564	2.3627	3.8307	3.8947	4.4598	5.3583	4.3807
4.3088	0.559565	3.58938	0.821451		8	4.0374	4.8127	4.9207	3.3007	4.7999	4.5735	3.6971	4.3893	3.9952	3.4602	4.6846	4.7863	4.7767	3.6311	3.418	4.5239	4.3852	4.3639	5.2113	4.4083		8	2.9559	4.0679	3.2878	2.7608	3.3427	4.2568	3.4061	3.6767	3.0548	2.3638	3.3166	3.4628	4.7911	3.0128	2.2658	4.07	3.5797	3.7216	5.3414	5.0525
4.23926	0.568481	3.35682	0.671352		9	3.4684	4.9703	3.9512	3.4476	4.7021	4.3552	3.8794	4.3306	4.4289	3.2265	4.0427	4.3966	5.2736	3.5797	3.9485	4.6641	4.3371	4.9563	4.8913	3.935		9	2.6738	3.647	3.263	2.6211	3.2782	3.2946	3.5537	3.2814	3.7076	2.48	3.1214	3.5994	5.1795	2.6102	2.5453	3.9131	3.2922	2.9022	3.7127	4.46
4.07509	0.569054	3.1989	0.60176		10	3.1463	4.5745	3.7537	3.2576	4.3286	3.8673	3.6879	3.7131	4.1742	3.8672	3.665	4.304	4.7833	3.7885	3.5224	4.5736	4.4127	4.4008	5.5745	4.1067		10	2.4008	2.8982	2.8783	2.6319	3.2405	2.9965	3.9696	3.1251	3.5358	2.3625	2.7312	3.5462	4.2755	2.494	3.1692	3.1606	3.124	2.9493	4.1404	4.3484
4.0437	0.630508	2.69107	0.538809		11	3.0615	4.4433	3.8007	3.2791	4.148	3.8526	4.3068	3.5626	4.7241	3.5956	4.4798	3.9452	5.2335	3.5819	2.609	4.4123	4.6139	4.5104	4.2816	4.4321		11	2.0527	2.7239	2.9682	2.0873	2.5542	2.1852	2.7102	2.299	3.6095	2.4818	2.3436	2.4474	4.1976	2.2908	2.4884	2.5968	2.4622	2.8303	3.2787	3.2136
4.11364	0.686193	2.19383	0.518065		12	2.9216	4.4912	4.6478	3.0886	5.2088	3.2611	3.544	3.6348	4.6747	3.7967	3.8101	4.8268	4.393	3.9557	3.4463	4.1731	3.7235	4.8713	5.025	4.7786		12	1.6395	2.119	2.5278	1.7848	1.9177	1.4989	2.7	1.6937	3.2018	1.907	2.3789	1.7512	2.7769	2.0802	2.0729	1.8947	1.6533	2.2427	2.9721	3.0636
4.21435	0.682388	2.01376	0.45658		13	3.0529	4.229	4.6015	2.9853	4.9342	3.351	4.308	3.3328	4.5437	4.1535	4.6156	4.9991	4.7328	3.8005	3.7475	4.255	3.8093	4.7286	5.5024	4.6043		13	1.5808	2.0577	2.3012	1.6929	1.91	1.4239	2.4044	1.5748	2.9522	2.1159	2.3104	1.6597	2.6453	1.5609	1.8101	1.7176	1.3727	2.0688	2.6959	2.42
4.36063	0.815453	1.89231	0.358181		14	2.7172	4.2224	4.3532	3.0601	5.3972	3.0047	4.1277	3.4916	4.9652	4.5347	4.9982	5.2077	4.5195	4.1124	4.225	4.9842	3.8916	4.9577	5.6843	4.758		14	1.614	1.9818	2.0086	1.7566	1.8015	1.5707	2.1093	1.569	2.5309	1.8769	2.3698	1.4295	2.2348	1.4529	1.6522	1.6236	1.3895	2.1425	2.3333	2.3988
4.32582	0.793684	1.80716	0.353347		15	3.0099	3.7269	4.6116	2.9761	5.0929	3.4893	3.8602	3.6665	4.8281	4.7351	4.8666	4.9185	4.7126	3.7587	3.5885	5.1479	3.8981	4.9633	5.9089	4.7567		15	1.414	2.0773	1.7939	1.7619	1.7076	1.4984	1.7857	1.7581	2.4732	1.8253	2.3063	1.4235	2.1138	1.4072	1.5829	1.2901	1.3742	2.1034	2.2004	2.246
4.45976	0.710128	1.80984	0.409232		16	3.478	4.163	4.517	3.3327	5.3794	3.5493	4.0955	3.4202	4.53	4.9514	5.0158	5.3509	4.5365	4.1196	3.7826	5.5065	4.3392	4.6241	5.4035	5.1		16	1.4445	1.8556	2.083	1.6854	1.598	1.5406	1.8943	1.3778	2.7436	1.8973	2.174	1.4638	2.2395	1.5003	1.458	1.2061	1.4403	1.9206	2.4779	2.1963
4.58524	0.7186	1.7806	0.478702		17	3.2288	4.6653	4.5402	3.2587	5.4399	3.8086	4.477	3.5289	4.9174	5.2817	5.0753	5.1211	4.8863	4.4107	3.9283	5.3104	4.7582	4.3041	5.6669	5.097		17	1.4326	1.8022	2.2487	1.6489	1.4839	1.356	1.8833	1.2603	2.8875	1.7388	2.2549	1.406	2.3769	1.2633	1.466	1.2796	1.3546	1.7352	2.4387	2.2947
4.61214	0.779414	1.66142	0.368657		18	3.3446	4.2032	4.3714	3.0875	4.9276	4.2075	4.2723	3.5874	4.5747	5.1377	5.5246	5.2803	5.1086	4.1806	4.1216	5.6918	4.5186	4.6583	5.5154	5.9292		18	1.385	1.9694	1.9563	1.482	1.4779	1.27	1.6681	1.2711	2.6616	1.6505	1.9751	1.4129	1.9633	1.3174	1.4192	1.3625	1.2973	1.6048	1.9751	2.1089
4.63911	0.721118	1.69054	0.385881		19	3.8228	4.0445	3.918	3.3726	5.0353	4.0803	4.3886	3.8902	4.7727	4.9687	5.565	5.568	4.4019	4.163	4.0004	5.5732	5.0405	4.9757	5.8358	5.365		19	1.397	1.8521	2.1159	1.5366	1.6566	1.3198	1.8154	1.1072	2.5385	1.5839	1.9781	1.4777	2.1022	1.2383	1.4464	1.2105	1.3762	1.8004	2.1275	2.1305
4.40231	0.706017	1.66461	0.459056		20	3.5582	3.7451	3.8532	3.0185	5.017	3.7821	4.7565	3.3241	4.4048	4.9577	5.333	5.0403	4.7786	3.9014	3.8697	4.7538	4.8621	4.9513	5.4403	4.6985		20	1.4001	2.0614	1.8547	1.6405	1.5156	1.0674	1.6761	1.1102	2.5561	1.6514	2.2724	1.3819	2.2882	1.1666	1.277	0.9918	1.2873	2.0673	2.1179	1.9083
4.28268	0.642671	1.6747	0.467482		21	3.8077	4.1009	3.952	3.0093	4.7718	3.4297	4.4437	2.9373	4.7242	4.4906	5.2242	4.7759	4.4215	3.9755	3.7191	4.7241	4.8346	4.6058	4.8845	4.8212		21	1.2127	1.8885	1.9232	1.6129	1.578	1.1253	1.7858	1.0511	2.2849	1.8319	2.7772	1.4423	2.1212	1.2059	1.3373	1.085	1.2422	1.783	2.1375	2.0682
4.33847	0.695493	1.59318	0.411248		22	3.8112	4.4913	3.9065	3.2437	4.6248	3.3831	4.1387	3.0832	4.4263	4.6604	4.8605	5.0716	4.7904	3.7304	3.4493	4.9969	4.6532	5.3985	5.0942	4.9552		22	1.0901	1.7572	1.9099	1.6264	1.6204	1.1132	1.5923	1.0467	2.3265	1.6348	2.4704	1.3282	1.722	1.2335	1.5328	0.9736	1.3875	1.5243	2.1142	1.8596
4.27189	0.725307	1.61748	0.432512		23	3.7154	4.0118	3.9655	3.1273	4.6595	3.4608	4.1628	3.0225	4.1776	4.5086	5.6108	4.9781	4.5814	3.6105	3.5492	4.4048	4.5755	5.2095	5.3785	4.7276		23	1.1439	1.91	2.0128	1.7311	1.4109	1.1808	1.7465	1.0883	2.4352	1.5715	2.5353	1.3145	1.7813	1.0774	1.5791	1.1465	1.2709	1.746	2.1238	1.5439
4.07287	0.664845	1.60631	0.418752		24	3.8831	4.0406	3.5146	3.2719	4.853	3.3917	4.1667	2.6883	4.2776	4.6729	5.1979	4.3283	4.0301	3.4359	3.2207	4.331	4.6559	4.3769	5.0936	4.0267		24	1.2717	1.8094	1.7929	1.6443	1.5033	1.1346	1.8326	1.1271	2.3992	1.4991	2.4637	1.3128	1.7107	1.1499	1.447	1.0372	1.1375	2.0118	2.0116	1.8297
3.95381	0.6839	1.60596	0.38003		25	3.4572	3.8888	3.5164	3.0228	4.232	3.0752	3.9257	2.4886	4.1554	4.2195	5.2126	4.5639	4.2699	3.5425	3.2532	4.3243	4.3943	4.0046	4.9927	4.5366		25	1.2081	1.9734	1.4297	1.5806	1.7225	1.2815	1.5296	1.0501	2.3553	1.5984	2.3495	1.1919	1.8393	1.2638	1.4621	1.2261	1.3217	1.8812	1.9204	1.9339
3.8386	0.682823	1.60743	0.410134		26	3.3384	3.8771	3.7794	2.875	4.3819	3.0636	3.672	2.7229	4.0116	3.698	5.326	4.2919	3.968	3.1924	2.9246	4.1785	4.6942	4.0101	4.77	3.9964		26	1.2798	1.6709	1.7796	1.5109	1.5776	1.0335	1.6549	1.0893	2.3734	1.5679	2.4391	1.1562	1.7325	1.1543	1.5267	1.2683	1.3913	1.6866	2.019	2.2369
3.83531	0.821537	1.65615	0.45568		27	3.5886	3.4251	3.6842	2.7185	4.2186	2.8281	3.7065	2.508	4.0991	3.7067	5.8765	3.9142	3.9409	3.1657	2.921	4.5619	4.4596	3.7694	4.9085	4.7051		27	1.4664	1.8205	1.9381	1.6185	1.5394	1.1925	1.7109	1.0786	2.3599	1.2779	2.8894	1.3479	1.6116	1.296	1.3441	1.2318	1.3891	1.7148	2.0625	2.2331
3.74817	0.715473	1.65796	0.44589		28	3.6788	4.0391	3.6755	2.7841	3.7967	2.8774	3.8106	2.4363	3.7009	3.4054	5.3402	3.9524	3.9039	3.2075	3.052	4.0112	4.7854	3.5224	4.9486	4.0349		28	1.3033	2.3577	1.9181	1.7097	1.9391	1.1674	1.798	0.9936	2.1478	1.7873	2.543	1.2252	1.513	1.261	1.3135	1.1303	1.3904	1.5323	2.2771	1.8515
3.57247	0.633724	1.66252	0.545477		29	3.5425	3.4493	3.3791	2.6756	3.5486	3.0881	4.0889	2.4842	3.7203	3.3558	5.2453	3.9154	3.5325	2.8342	2.9612	3.9074	3.8765	3.4234	4.4754	3.9457		29	1.2742	2.0728	1.7365	1.7212	1.5044	1.1878	1.7675	0.9651	2.2079	1.7964	3.4502	1.0629	1.6817	1.2022	1.4926	1.2487	1.3227	1.6972	2.0625	1.7959
3.42194	0.594426	1.6477	0.484085		30	3.2963	3.2975	3.5215	2.5488	3.4868	2.9123	3.2693	2.5523	3.5366	3.1222	4.8477	3.5898	3.4434	2.7699	2.7873	3.7628	4.0682	3.2965	4.4971	3.8325		30	1.1842	1.9317	1.7172	1.6063	1.6774	1.191	1.6119	1.1911	2.0208	1.6217	3.1217	1.1097	1.7319	1.2157	1.3582	1.1029	1.4793	1.7774	2.1283	2.1756
3.34284	0.628181	1.6422	0.405717		31	3.3031	3.1066	3.268	2.3516	3.4843	2.6643	3.4654	2.4654	3.8391	2.8632	4.91	3.2069	3.4779	2.7331	2.8563	3.6078	3.9716	3.2509	4.3546	3.6768		31	1.2357	1.8706	1.7522	1.5112	1.4978	1.0762	1.7785	1.2104	2.2052	1.7686	2.5638	1.2578	1.8282	1.1924	1.4654	1.2091	1.4649	1.6546	2.1566	2.1448
3.20733	0.561779	1.63433	0.421815		32	3.1482	3.2462	3.4263	2.5704	3.37	2.6477	3.2909	2.2951	3.7611	2.9489	4.7477	2.8999	3.1612	2.5282	2.7829	3.1962	3.7778	3.0232	3.8872	3.4376		32	1.2871	1.9074	1.6788	1.9492	1.5955	1.2906	1.8724	1.2024	1.8464	1.6008	2.4898	1.2078	1.6107	1.1427	1.3902	1.1937	1.3144	1.5017	2.658	1.947
3.0939	0.49813	1.65939	0.440819		33	2.9484	3.1073	3.1598	2.6359	2.7833	2.7597	3.3007	2.2178	3.5467	2.9853	4.3782	3.0567	3.043	2.677	2.7034	2.9611	3.6629	2.7335	3.9712	3.246		33	1.5401	1.8042	1.5646	1.714	1.7746	1.0944	1.496	1.1997	1.8985	1.8659	2.7598	1.2276	1.5402	1.1945	1.737	1.15	1.2506	1.7846	2.5063	2.0853
3.03459	0.516271	1.63314	0.410106		34	2.8462	2.9541	2.9344	2.5733	2.8681	2.601	3.5947	2.1571	3.5463	3.1047	4.1925	2.7014	3.0753	2.4935	2.5642	3.0226	3.0948	2.7971	3.9833	3.5873		34	1.3856	1.833	1.6921	1.6526	1.4601	1.1789	1.521	1.2924	2.2529	1.9039	2.663	1.1676	2.0384	1.0573	1.5158	1.2965	1.2898	1.5946	2.1179	1.7493
2.86615	0.478622	1.64004	0.415716		35	2.8827	2.8749	2.7454	2.3928	2.8337	2.436	3.2898	2.1354	3.2388	2.8087	3.994	2.4756	3.005	2.2905	2.202	2.7114	3.0808	2.9481	3.4463	3.5311		35	1.3061	1.8655	1.7589	1.6558	1.4857	1.2715	1.9382	1.0593	2.2264	1.616	2.7288	1.2373	1.7564	1.1102	1.5955	1.0856	1.4818	1.7187	1.9479	1.9553
2.75704	0.390286	1.62524	0.457996		36	2.5647	2.8607	2.9815	2.3152	2.8366	2.3844	2.9761	2.1399	3.0949	2.8512	3.7665	2.3694	2.8234	2.2076	2.4288	2.7018	2.9121	2.6652	3.1857	3.0751		36	1.5301	1.912	1.5998	1.8027	1.468	1.0953	1.5018	0.9289	2.198	1.5977	2.8566	1.2667	1.7671	1.1988	1.5735	1.1757	1.2289	1.5689	2.2432	1.9911
2.6992	0.443598	1.59044	0.378723		37	2.5284	2.7447	2.7482	2.3698	2.6502	2.1885	2.9339	2.0587	3.3187	2.762	3.7799	2.3568	2.8013	2.0844	2.2934	2.4471	2.9246	2.5864	3.1467	3.2603		37	1.422	2.0182	1.7025	1.7869	1.5002	1.1655	1.47	1.0873	2.1329	1.4277	2.1913	1.2278	1.6508	1.1713	1.2827	1.285	1.2736	1.6299	2.2124	2.1709
2.62004	0.469099	1.59199	0.397209		38	2.5637	2.6011	2.5388	2.2984	2.5261	2.1716	2.7001	1.9842	3.2181	2.6805	3.4346	2.4013	2.5318	2.0018	2.2233	2.2703	2.6933	2.5071	3.6685	3.3862		38	1.5383	1.8396	1.2078	1.8612	1.4331	1.3255	1.7004	1.1288	2.271	1.6523	2.1756	1.0728	1.7034	1.0654	1.3348	1.2988	1.2311	1.6111	2.1	2.2888
2.50535	0.398503	1.63429	0.468953		39	2.4546	2.599	2.4948	2.2785	2.5044	2.0201	2.632	1.8476	2.9334	2.6401	3.2835	2.1426	2.5659	2.0097	1.9805	2.3767	2.5596	2.5193	3.1087	3.1559		39	1.3069	1.7235	1.7024	1.6593	1.5404	1.1996	1.4513	1.1232	2.1471	1.8742	2.5446	1.0381	1.8591	1.1491	1.2338	1.2155	1.2202	1.8916	2.5025	2.3034
2.35491	0.394153	1.62231	0.456369		40	2.3051	2.5541	2.3741	2.1952	2.3901	1.9567	2.422	1.7315	2.9189	2.5401	3.2265	1.9998	2.2181	1.9005	1.7944	2.1423	2.4889	2.2707	2.9414	2.7278		40	1.2917	1.6818	1.7325	1.6569	1.451	1.1974	1.5291	1.0627	2.4672	1.7011	2.567	1.1202	1.8822	1.1473	1.3223	1.1865	1.4035	1.5837	2.4194	2.0428
2.30765	0.438196	1.64571	0.443774		41	2.2942	2.5921	2.4088	2.1014	2.1782	1.9249	2.2296	1.7514	3.0477	2.4549	3.0463	1.9313	2.3174	1.8006	1.5966	2.033	2.4437	2.1284	3.1597	2.7129		41	1.2822	1.8863	1.9534	1.497	1.3503	1.2463	1.7865	1.3396	2.3393	1.7663	2.3859	0.9969	1.8639	1.0608	1.3317	1.1654	1.4017	1.6949	2.1902	2.3756
2.24493	0.404999	1.60002	0.423704		42	2.077	2.3667	2.4202	2.0199	2.1327	1.888	2.38	1.5565	2.8203	2.4277	2.771	1.9324	2.3267	1.8243	1.6935	1.9727	2.1325	2.2797	3.1427	2.7342		42	1.4673	1.5211	1.8295	1.5493	1.4831	1.0815	1.5995	1.0291	2.2171	1.6593	1.9911	1.0575	1.7341	1.2949	1.27	1.2115	1.3504	1.7681	2.5105	2.3755
2.14222	0.335947	1.59758	0.416455		43	1.9759	2.3306	2.3551	1.9914	1.9876	1.8284	2.1547	1.5441	2.4351	2.4421	2.6988	1.882	2.3723	1.7559	1.6774	1.9632	2.0212	2.2075	2.8	2.4211		43	1.2994	1.6144	1.6845	1.6918	1.3809	1.0616	1.7153	1.1742	2.15	2.2109	2.1248	1.0861	1.8696	1.2107	1.1347	1.2696	1.3203	1.5111	2.0893	2.3524
2.06034	0.313349	1.66366	0.482294		44	2.088	2.2751	2.3278	1.9559	2.1126	1.7584	1.8658	1.6304	2.4753	2.2439	2.6076	1.735	2.0802	1.6573	1.6372	1.8157	1.9678	2.0529	2.6583	2.2616		44	1.412	1.6979	1.8595	1.7876	1.3507	1.3588	1.7036	1.1431	2.1841	2.1433	2.8295	1.038	1.6785	1.1618	1.253	1.1444	1.3973	1.5351	2.3468	2.2483
2.062	0.360227	1.63207	0.505914		45	2.0229	2.3146	2.3417	1.9192	2.1502	1.6408	2.1415	1.5902	2.5365	2.276	2.6873	1.621	1.9269	1.6359	1.6915	1.7736	1.8773	1.9784	2.7562	2.3582		45	1.1977	1.5731	1.9563	1.7409	1.3098	1.2657	1.4145	1.1015	2.2189	2.0885	2.7139	1.1337	1.5217	1.151	1.4732	1.0676	1.3571	1.4804	2.5616	2.3143
2.01139	0.338391	1.61627	0.465887		46	1.9151	2.2358	2.0901	1.9115	2.1084	1.61	2.2121	1.5304	2.5691	2.2548	2.6005	1.7095	1.8937	1.623	1.6021	1.622	1.9226	1.9602	2.4873	2.3697		46	1.373	1.7087	1.6352	1.6233	1.4124	1.4074	1.326	1.0408	2.0954	2.2687	2.3582	1.2229	1.4649	1.2016	1.2683	1.1675	1.3645	1.4143	2.6594	2.3128
1.97881	0.37614	1.65658	0.455978		47	1.772	2.1088	2.0654	1.8372	1.9477	1.6493	2.1373	1.3892	2.6456	2.1576	2.5572	1.6328	1.8241	1.6392	1.5532	1.6577	1.9749	2.0014	2.8238	2.2018		47	1.2639	1.7963	1.7701	1.6045	1.6297	1.2588	1.5238	1.2988	2.2592	2.0118	2.5566	1.1858	1.4854	1.1807	1.279	1.0902	1.3944	1.7707	2.198	2.5739
1.92761	0.369391	1.62997	0.45281		48	1.7799	2.1029	2.2704	1.6459	1.9512	1.6332	1.8928	1.424	2.6585	2.0973	2.4381	1.5628	1.752	1.633	1.5654	1.6373	1.7734	1.8673	2.7268	2.1401		48	1.0909	1.8076	1.8705	1.7935	1.6761	1.2366	1.4237	1.1108	2.4529	1.6012	2.4276	1.2605	1.6788	1.2147	1.1468	1.1345	1.4881	1.6067	2.4036	2.1743
1.90309	0.363354	1.59362	0.428763		49	1.6907	2.2343	2.055	1.7316	1.9346	1.6536	1.9175	1.4106	2.5679	2.071	2.5375	1.5197	1.7728	1.6476	1.5043	1.6247	1.7401	1.8181	2.6916	1.9385		49	1.2815	1.884	1.6045	1.7185	1.7569	1.1752	1.5493	1.1763	2.3154	1.7089	2.4019	1.1957	1.7647	1.2361	1.1206	1.0246	1.3422	1.4794	2.4807	1.6561
1.86708	0.310439	1.58292	0.438855		50	1.69	2.1314	2.03	1.7406	1.9022	1.6139	1.9573	1.2977	2.4665	2.045	2.3584	1.4941	1.9359	1.5464	1.5113	1.7174	1.6669	1.9756	2.3189	1.9421		50	1.2783	1.8152	1.7011	1.6154	1.6712	1.3383	1.6597	1.0224	2.0692	1.883	2.2884	1.1947	1.5091	1.1484	1.1946	0.9612	1.2593	1.5819	2.7089	1.7582
1.84735	0.297527	1.64632	0.430178		51	1.6353	2.0803	1.9301	1.7219	1.8104	1.5897	2.0416	1.3479	2.5078	2.068	2.1796	1.5512	1.7946	1.568	1.4598	1.5944	1.7936	1.9568	2.2564	2.0595		51	1.2957	1.9283	1.9807	1.7881	1.6404	1.3344	1.6207	1.0483	2.4032	2.1175	2.2423	1.0386	1.4735	1.0569	1.4091	1.2674	1.4031	1.5763	2.3184	1.9836
1.81866	0.307143	1.62564	0.458327		52	1.6373	2.2058	1.9068	1.7355	1.7784	1.5827	1.9953	1.3553	2.5707	2.0029	2.1741	1.533	1.6986	1.5456	1.4731	1.5232	1.7324	1.8204	2.2423	1.8599		52	1.2668	1.9366	1.729	1.7116	1.3478	1.2683	1.6989	0.9815	2.83	1.7881	2.0605	1.0655	1.5119	1.2425	1.4401	1.1612	1.5126	1.6409	2.4333	1.8856
1.77927	0.273546	1.62221	0.444337		53	1.595	1.9957	1.8316	1.679	1.7421	1.5716	1.938	1.2876	2.4021	1.9728	2.1056	1.5214	1.6932	1.5308	1.4472	1.5498	1.7434	1.8883	2.1711	1.9191		53	1.2364	1.7584	1.6939	1.6467	1.5914	1.1757	1.5572	1.0577	2.6877	2.1775	2.2995	1.2332	1.5442	1.1774	1.3954	1.23	1.302	1.5333	2.2664	1.8803
1.74464	0.232796	1.56906	0.429645		54	1.5789	1.9701	1.9084	1.6886	1.7899	1.5443	1.8679	1.3302	2.1557	1.9658	1.9446	1.5107	1.7168	1.476	1.4887	1.4976	1.6164	1.8125	2.0959	1.9338		54	1.2944	1.7045	1.503	1.6121	1.4763	1.2216	1.5415	1.1508	2.4551	1.8626	2.1374	1.1853	1.4848	1.2004	1.1161	1.1618	1.2384	1.4201	2.4184	2.1966
1.7213	0.257829	1.57912	0.470511		55	1.5512	1.9714	1.891	1.6111	1.7847	1.559	1.7787	1.2895	2.2622	1.9369	1.9163	1.4462	1.5996	1.4598	1.3798	1.492	1.6077	1.8701	2.0558	1.963		55	1.2882	1.648	1.6443	1.4986	1.5449	1.0124	1.6011	1.0605	2.5486	1.6125	2.4598	1.142	1.6671	1.0889	1.2265	1.1674	1.2821	1.5484	2.3691	2.172
1.70497	0.234326	1.59152	0.498224		56	1.5466	1.905	1.8006	1.6755	1.6935	1.5085	1.8669	1.2793	2.1568	1.694	1.9776	1.4934	1.6143	1.5062	1.45	1.4705	1.6803	1.7426	2.145	1.8928		56	1.3004	1.7162	1.5854	1.7695	1.592	1.1157	1.5245	1.1038	2.2897	1.6705	2.6252	0.9918	1.3113	1.2362	1.1534	1.1446	1.3325	1.4866	2.6373	2.2438
1.70984	0.222722	1.62786	0.494254		57	1.511	1.7986	1.7442	1.7533	1.7345	1.508	1.8942	1.3322	2.2845	1.7518	1.8231	1.5369	1.6831	1.5188	1.5589	1.4687	1.5962	1.7709	2.097	1.8309		57	1.2421	1.9553	1.7117	1.9166	1.4877	1.0963	1.5191	1.1123	2.5106	1.831	2.2198	1.082	1.664	1.2979	1.1043	1.1242	1.2524	1.4923	2.6002	2.3375
1.6773	0.21973	1.54172	0.443832		58	1.5574	1.8244	1.6747	1.6352	1.694	1.5008	1.7085	1.3188	2.0597	1.7446	1.8255	1.4884	1.6025	1.4682	1.4183	1.5012	1.6354	1.7757	2.2352	1.8776		58	1.138	1.7984	1.4156	1.9274	1.6169	1.0764	1.4633	1.2389	2.1082	1.6642	1.8222	1.2041	1.5016	1.0837	1.1524	0.9869	1.2496	1.4979	2.6823	2.2063
1.67079	0.218864	1.55051	0.485828		59	1.5654	1.832	1.7512	1.6368	1.7086	1.5384	1.8626	1.276	2.0828	1.773	1.941	1.454	1.5027	1.4793	1.4029	1.4247	1.5427	1.8672	1.9491	1.8254		59	1.1585	1.5174	1.7524	1.733	1.6211	1.0918	1.6862	1.0389	2.5877	1.6226	2.3465	1.012	1.511	1.101	1.2571	1.112	1.1809	1.2694	2.5219	1.8887
1.66833	0.198425	1.53402	0.379225		60	1.5106	1.9222	1.7225	1.5814	1.6586	1.5048	1.7853	1.3739	2.0752	1.7563	1.9597	1.4683	1.6051	1.4521	1.4965	1.4746	1.587	1.6527	1.8882	1.8916		60	1.2267	1.6907	1.6557	1.7653	1.3971	1.2722	1.5191	1.1164	2.0822	1.5928	1.9701	1.1488	1.5593	1.259	1.1942	1.1179	1.3394	1.2888	2.5375	1.9473
1.66322	0.188797	1.53341	0.426127		61	1.5219	1.8204	1.7384	1.659	1.6035	1.5626	1.6697	1.3806	2.1414	1.7096	1.7841	1.4468	1.62	1.4906	1.4835	1.5048	1.5781	1.7383	2.0095	1.8017		61	1.2745	1.7362	1.7965	1.5716	1.4433	1.1841	1.6109	1.0539	2.4186	1.8309	2.0818	1.0133	1.5691	1.167	0.9929	1.1411	1.2417	1.3766	2.3724	1.7917
1.63506	0.157278	1.54519	0.430777		62	1.4689	1.6766	1.7293	1.6142	1.5983	1.5563	1.6926	1.3947	2.0358	1.6968	1.8298	1.4762	1.5919	1.5048	1.484	1.4644	1.6143	1.7289	1.866	1.6774		62	1.1535	1.5326	1.7577	1.6674	1.2215	1.2761	1.5922	1.2513	2.5006	1.7112	1.953	1.2049	1.7395	1.1905	1.0228	1.0598	1.2398	1.4042	2.4844	1.9409
1.61283	0.148534	1.52084	0.356077		63	1.4609	1.8112	1.6352	1.5948	1.5739	1.5413	1.6794	1.356	1.9242	1.6333	1.7792	1.4774	1.5595	1.4512	1.562	1.4426	1.5289	1.7475	1.8287	1.6694		63	1.3973	1.7749	1.8599	1.8914	1.3268	1.4019	1.5077	1.0736	2.0797	1.5154	2.2318	0.9763	1.3905	1.1507	1.2184	1.1451	1.2872	1.4295	1.9239	1.8348
1.61053	0.130407	1.48335	0.35055		64	1.4969	1.7107	1.6939	1.5911	1.5973	1.5141	1.6921	1.4156	1.8268	1.6539	1.6451	1.448	1.611	1.4838	1.529	1.4451	1.5047	1.7477	1.8694	1.7344		64	1.0822	1.7605	1.6027	1.7236	1.2699	1.3117	1.2783	1.1372	2.0935	1.6036	1.9239	1.0711	1.5524	1.1991	1.1451	1.1903	1.3396	1.4014	2.3144	1.6666
1.65511	0.118546	1.27155	0.201307		65	1.5427	1.6964	1.6657	1.6521	1.6063	1.6297	1.5268	1.5672	1.9504	1.6731	1.6898	1.5185	1.5425	1.5906	1.7108	1.5374	1.5667	1.77	1.8354	1.8301		65	1.1484	1.3608	1.3542	1.773	1.1155	1.3185	1.2565	1.1175	1.314	1.1633	1.2727	0.9631	1.2349	1.1535	1.2454	0.9491	1.2746	1.2389	1.6491	1.5281
1.64885	0.132374	1.25422	0.262017		66	1.5505	1.7396	1.7638	1.6485	1.5728	1.5895	1.5394	1.4963	1.9902	1.6807	1.6814	1.538	1.5677	1.5923	1.7163	1.4824	1.5276	1.6753	1.9003	1.7244		66	1.1104	1.2117	1.2962	1.4482	1.1357	0.9804	1.1636	1.2426	1.3664	1.1933	1.5048	1.0358	1.0982	1.2381	1.0521	0.9279	1.1001	1.2651	1.6377	2.0761
1.64759	0.153238	1.28123	0.194597		67	1.5678	1.6531	1.6874	1.5862	1.6205	1.6467	1.5099	1.3928	2.042	1.6442	1.6812	1.4892	1.6688	1.5737	1.6535	1.5089	1.5105	1.8808	1.8949	1.7397		67	1.1266	1.3027	1.3838	1.5981	1.2196	1.1942	1.1111	1.0331	1.4548	1.173	1.3308	0.9571	1.3866	1.2226	1.2389	1.0997	1.2214	1.2678	1.7058	1.5969
1.62179	0.102336	1.24578	0.211663		68	1.5498	1.6243	1.6808	1.5904	1.6633	1.6634	1.498	1.5443	1.825	1.6407	1.6374	1.4712	1.6137	1.5793	1.5498	1.5046	1.5268	1.7738	1.8344	1.6648		68	1.0848	1.1787	1.5192	1.6378	1.2303	1.1701	1.0765	1.1231	1.3951	1.2132	1.3184	0.948	1.1545	1.0651	1.1149	1.0695	1.0953	1.3196	1.7683	1.4331
1.62708	0.126192	1.24093	0.195844		69	1.5516	1.64	1.726	1.6318	1.5837	1.5856	1.5099	1.4793	1.8408	1.6089	1.6576	1.5449	1.6578	1.5204	1.5742	1.4828	1.554	1.7721	1.99	1.6303		69	1.0825	1.2917	1.3942	1.5583	1.1712	1.2504	1.2218	1.0202	1.3967	1.1452	1.2987	0.9606	1.3059	1.063	1.2241	0.8667	1.115	1.326	1.579	1.5473
1.63671	0.135943	1.28014	0.212921		70	1.5344	1.7033	1.7045	1.539	1.523	1.5178	1.5034	1.5671	1.8498	1.607	1.7779	1.5377	1.6007	1.56	1.6102	1.5058	1.5108	1.8057	1.9046	1.8716		70	0.9631	1.3468	1.2875	1.4571	1.2088	1.288	1.0908	1.1779	1.3975	1.3588	1.2697	1.2175	1.3533	1.1266	1.2649	0.8994	1.1619	1.2336	1.6545	1.8451
1.6277	0.133611	1.28666	0.238872		71	1.5075	1.6938	1.6786	1.5388	1.5727	1.52	1.5411	1.4411	1.9489	1.6274	1.6363	1.5273	1.6227	1.5835	1.7743	1.5158	1.529	1.6422	1.912	1.741		71	0.9483	1.3451	1.3288	1.5155	1.145	1.0226	1.1503	1.281	1.5296	1.3166	1.5708	1.0137	1.3526	1.094	1.3676	0.9691	1.1321	1.1986	1.8308	1.6212
1.59163	0.091751	1.23843	0.175801		72	1.5249	1.6031	1.757	1.5487	1.5022	1.5971	1.5204	1.4772	1.7916	1.5975	1.6202	1.545	1.5892	1.5552	1.5381	1.4771	1.5171	1.672	1.7462	1.6528		72	1.0806	1.3037	1.3926	1.5338	1.1721	1.2555	1.0263	1.2975	1.5502	1.3347	1.3321	0.8914	1.2887	0.9843	1.1048	1.188	1.1334	1.1637	1.4693	1.2659
1.6075	0.112697	1.25762	0.221312		73	1.5144	1.6962	1.6699	1.5473	1.5119	1.5666	1.5299	1.5324	1.7644	1.5813	1.6346	1.5382	1.6505	1.5448	1.5085	1.4784	1.5148	1.7215	1.9169	1.7274		73	1.109	1.3204	1.4429	1.4804	1.0683	1.2831	1.2337	1.1502	1.421	1.2273	1.2398	1.0234	1.4144	1.2037	1.0644	0.9911	1.0541	1.0573	1.4511	1.9167
1.61225	0.113571	1.27077	0.265421		74	1.5483	1.6282	1.6793	1.5169	1.5577	1.5262	1.5568	1.4796	1.8711	1.6537	1.6508	1.5286	1.5982	1.5592	1.5349	1.4963	1.5562	1.7787	1.8638	1.6604		74	1.0529	1.4481	1.3402	1.5251	1.0588	1.5498	0.9918	1.5101	1.5281	1.2697	1.3231	0.9761	1.2659	1.0876	0.9329	1.1164	0.9048	1.1079	1.55	1.8761
1.62649	0.128387	1.24673	0.278602		75	1.5416	1.6252	1.6407	1.5249	1.5327	1.5909	1.5181	1.564	1.9246	1.5878	1.7022	1.5463	1.5573	1.5201	1.5959	1.5124	1.5545	1.8069	1.8994	1.7844		75	1.0824	1.2709	1.148	1.5767	1.1653	1.4198	0.9532	1.3968	1.6205	1.2786	1.2648	0.8761	1.2879	0.9431	0.9595	0.9327	1.0602	1.1348	1.71	1.8533
1.6054	0.0959554	1.21989	0.222063		76	1.5121	1.6342	1.8205	1.5108	1.5406	1.5578	1.5523	1.5017	1.7953	1.6061	1.598	1.5511	1.6085	1.5426	1.6505	1.4873	1.557	1.7103	1.7353	1.6359		76	1.1335	1.2763	1.2781	1.7228	1.0814	1.204	1.1799	1.2134	1.3021	1.2808	1.4599	0.9374	1.1594	1.1079	0.9698	1.1696	0.8739	1.0533	1.7406	1.2538
1.57541	0.0975661	1.25412	0.177397		77	1.4954	1.6239	1.7704	1.5462	1.5314	1.465	1.4981	1.5094	1.7663	1.5958	1.5935	1.5204	1.5198	1.5459	1.496	1.4987	1.4745	1.6341	1.6831	1.7403		77	1.1017	1.205	1.6164	1.4567	1.1463	1.2171	1.2105	1.2677	1.3321	1.1773	1.3903	1.1479	1.2382	1.0778	0.9703	1.0266	1.0965	1.3817	1.5666	1.4558
1.59982	0.10361	1.2631	0.237781		78	1.5427	1.6419	1.7339	1.5699	1.5402	1.5383	1.4564	1.5635	1.6989	1.582	1.6013	1.4845	1.6031	1.5373	1.5397	1.5565	1.4882	1.6827	1.861	1.7743		78	0.9887	1.1106	1.521	1.8148	1.1173	1.2952	1.2202	1.3969	1.4061	1.187	1.1703	1.2282	1.1558	1.1047	0.9987	0.9846	1.0007	1.3229	1.7103	1.5281
1.60959	0.113322	1.24992	0.224805		79	1.5399	1.6408	1.7545	1.5365	1.5162	1.4978	1.5318	1.7694	1.741	1.5945	1.6742	1.5236	1.5987	1.5554	1.4724	1.4858	1.5046	1.6928	1.8706	1.6913		79	1.0203	1.2591	1.4394	1.4813	1.0265	1.3864	1.2347	1.5188	1.3242	1.3895	1.1513	0.9943	1.2389	1.096	0.8499	0.9567	1.0977	1.3339	1.7263	1.4732
1.62887	0.106682	1.2374	0.17532		80	1.529	1.6519	1.7692	1.6507	1.5421	1.5044	1.6756	1.7606	1.7923	1.6003	1.6406	1.5028	1.5996	1.5184	1.5235	1.5028	1.5605	1.6952	1.8303	1.7276		80	1.2231	1.2781	1.2368	1.6552	1.0616	1.2988	1.1498	1.2844	1.1401	1.2163	1.1715	1.0019	1.0936	1.1057	1.2908	1.06	1.0954	1.2852	1.5906	1.509
1.6269	0.123508	1.22294	0.243052		81	1.5153	1.607	1.7725	1.6018	1.4879	1.5069	1.6412	1.9138	1.7536	1.6163	1.5849	1.5111	1.582	1.5917	1.5654	1.5187	1.5175	1.6075	1.8016	1.8413		81	1.181	1.2701	1.2422	1.5812	1.0437	1.0516	1.1822	0.9627	1.2613	1.0586	1.1542	1.0177	1.4531	1.033	1.1842	0.9915	1.1571	1.2165	1.4226	1.9944
1.61245	0.118588	1.25091	0.219337		82	1.4878	1.6277	1.7302	1.7096	1.4919	1.4955	1.6145	1.8685	1.7355	1.635	1.5884	1.4788	1.5844	1.5353	1.5527	1.5089	1.4867	1.5936	1.8577	1.6664		82	1.03	1.2411	1.2284	1.5869	0.9389	1.4704	1.2454	1.4011	1.4505	1.2222	1.3048	1.0683	1.0911	0.981	1.255	1.0003	1.0039	1.2623	1.7031	1.5336
1.63792	0.162225	1.2788	0.201019		83	1.5001	1.6878	1.7025	1.7257	1.487	1.5303	1.6084	2.1532	1.9186	1.5616	1.6192	1.5371	1.6136	1.5613	1.5091	1.5149	1.4836	1.6509	1.726	1.6674		83	1.1674	1.1751	1.4806	1.6503	0.9997	1.3268	1.1767	1.4682	1.5429	1.2522	1.3413	1.069	1.2497	1.1835	1.2623	1.1011	0.98	1.0676	1.6042	1.4774
1.65822	0.203635	1.27195	0.231771		84	1.5157	1.6434	1.6855	1.7987	1.5343	1.6598	1.6624	2.3718	1.863	1.5452	1.6827	1.5051	1.5963	1.5764	1.5492	1.4862	1.4295	1.6058	1.8431	1.6103		84	1.086	1.2415	1.388	1.3746	1.3214	1.303	1.2587	1.502	1.5322	1.2131	1.4077	0.8604	1.6696	1.0976	0.9733	0.9843	0.9886	1.1058	1.6149	1.5162
1.66696	0.236188	1.25406	0.221631		85	1.5056	1.6105	1.7541	1.9465	1.5604	1.6018	1.6591	2.4953	1.7828	1.5958	1.6765	1.5131	1.5634	1.5153	1.4817	1.468	1.4774	1.6073	1.8957	1.6289		85	0.9826	1.1642	1.4431	1.4193	1.1854	1.4716	1.1334	1.6454	1.4713	1.3242	1.3049	0.9873	1.341	1.0042	0.9545	1.0567	1.1225	1.1274	1.7126	1.2297
1.6805	0.230271	1.299	0.25332		86	1.5065	1.6659	1.7524	2.0788	1.4942	1.5797	1.5781	2.4536	1.7233	1.5658	1.6321	1.5143	1.5543	1.5685	1.6453	1.4786	1.5457	1.6878	1.8187	1.7664		86	1.0813	1.3019	1.4905	1.5725	1.0514	1.45	1.3493	1.6734	1.5209	1.2278	1.4672	0.9081	1.4366	1.0864	0.9691	1.0052	1.057	1.0828	1.5196	1.729
1.68161	0.228123	1.26697	0.272182		87	1.537	1.671	1.7077	1.9428	1.5161	1.6164	1.5762	2.5261	1.7505	1.7006	1.6299	1.5322	1.6397	1.5226	1.637	1.4918	1.5348	1.6685	1.8245	1.6067		87	1.1251	1.0788	1.4779	1.5049	1.0641	1.3492	1.2147	1.4894	1.3946	1.3853	1.2065	0.8677	1.0924	1.0654	0.9552	1.0422	1.1882	1.2274	1.53	2.0804
1.70175	0.236817	1.28968	0.255461		88	1.5078	1.6775	1.712	1.9774	1.5591	1.5935	1.7233	2.5253	1.8205	1.6035	1.5951	1.4935	1.7652	1.509	1.7265	1.489	1.5199	1.6271	1.8916	1.7182		88	1.0924	1.1565	1.2604	1.6784	1.0307	1.3632	1.3047	1.5885	1.4537	1.2183	1.1826	1.1064	1.3271	1.0188	1.0479	0.9641	1.0843	1.3733	1.6293	1.913
1.66897	0.224415	1.24541	0.198951		89	1.5916	1.604	1.7031	1.9344	1.4525	1.6151	1.7321	2.4255	1.8601	1.581	1.484	1.4632	1.6357	1.5826	1.6021	1.4918	1.5172	1.5819	1.8954	1.6262		89	1.1086	1.1646	1.1336	1.6809	1.0551	1.2289	1.2531	1.5088	1.4314	1.1118	1.142	1.1149	1.5121	1.4081	0.9427	1.0125	1.15	1.102	1.4545	1.3927
1.67055	0.249258	1.21972	0.241843		90	1.5242	1.5487	1.6307	1.9825	1.5021	1.6041	1.6638	2.5877	1.7687	1.6822	1.6535	1.5314	1.5684	1.5079	1.5119	1.5109	1.5046	1.6107	1.8207	1.6962		90	0.9209	1.0956	1.2431	1.5276	1.0778	1.2763	1.1426	1.5459	1.3232	1.1634	1.0546	0.976	1.3914	1.2166	1.2081	0.9162	1.0567	0.9131	1.5666	1.7786
1.66053	0.250605	1.26914	0.194641		91	1.5188	1.5807	1.6135	2.1053	1.4945	1.547	1.6534	2.5442	1.7566	1.65	1.6001	1.5007	1.5841	1.5537	1.4811	1.538	1.4741	1.6946	1.7169	1.6032		91	0.9931	1.2094	1.5038	1.4206	1.0338	1.0779	1.3083	1.2785	1.4452	1.4609	1.184	1.1432	1.3491	1.0849	1.2428	1.0059	1.1442	1.2637	1.6873	1.5462
1.66356	0.250701	1.23875	0.209651		92	1.5306	1.6194	1.5463	2.2362	1.4826	1.5843	1.6212	2.4478	1.8346	1.6114	1.5465	1.5336	1.6485	1.5482	1.4699	1.4649	1.5312	1.6166	1.7283	1.6691		92	1.1257	1.2214	1.3234	1.413	1.0774	1.1417	1.4052	1.534	1.362	1.3229	1.2932	0.9779	1.5212	1.064	0.9435	1.0867	0.9658	1.0011	1.3308	1.664
1.61373	0.147912	1.25857	0.220631		93	1.5392	1.6309	1.5828	2.0722	1.4951	1.5813	1.7157	1.355	1.7811	1.5747	1.5731	1.5011	1.6038	1.5906	1.5768	1.5001	1.5047	1.6044	1.7613	1.7307		93	1.232	1.4309	1.2908	1.3815	1.1132	1.1615	1.2157	1.6501	1.2641	1.2833	1.0686	1.0867	1.6344	1.0528	1.1973	0.9295	0.8919	1.2078	1.4062	1.6732
1.6091	0.165675	1.31505	0.249743		94	1.554	1.545	1.6087	2.1466	1.5111	1.6062	1.6973	1.3365	1.7269	1.586	1.5554	1.5185	1.6292	1.5335	1.4663	1.4882	1.5319	1.585	1.8205	1.7352		94	1.1837	1.3271	1.4308	1.4347	1.1502	1.3108	1.2556	1.7761	1.4657	1.3076	0.9731	1.1282	1.474	1.1283	1.2848	1.0122	1.0512	1.0815	1.6138	1.9116
1.58903	0.151949	1.27203	0.212136		95	1.5455	1.5414	1.594	2.1076	1.5171	1.5095	1.6876	1.3212	1.7362	1.5825	1.6003	1.5106	1.6033	1.5352	1.4827	1.4957	1.5185	1.5435	1.6703	1.6778		95	1.3688	1.2368	1.4921	1.6278	1.139	1.2056	1.31	1.6629	1.2223	1.2788	1.1149	1.1486	1.5037	1.1179	0.9774	0.9324	1.0082	1.1397	1.4722	1.4815
1.5993	0.142099	1.29233	0.291455		96	1.5352	1.5469	1.5908	1.9876	1.4967	1.6394	1.7935	1.3408	1.7111	1.5996	1.648	1.4636	1.6224	1.6042	1.4569	1.4453	1.5183	1.5725	1.6828	1.7304		96	1.3325	1.2058	1.1953	1.4888	1.0783	1.4577	1.4375	2.1403	1.1581	1.1206	1.0205	1.1347	1.3305	1.1784	1.0557	1.0456	1.0582	1.038	1.5471	1.823
1.64269	0.154483	1.33858	0.292892		97	1.5536	1.5934	1.5683	2.0729	1.5355	1.5704	1.8797	1.436	1.792	1.6402	1.6395	1.514	1.7143	1.6042	1.5808	1.4933	1.5137	1.5716	1.7913	1.7891		97	1.1418	1.2528	1.1571	1.57	1.016	1.3801	1.3696	1.7997	1.4044	1.3726	1.2508	1.0488	1.7613	1.0503	1.0794	1.1241	1.2709	1.0663	1.5555	2.1002
1.64477	0.199864	1.35948	0.304458		98	1.544	1.5559	1.5398	2.1894	1.5216	1.6219	2.0654	1.3784	1.7066	1.702	1.5799	1.4816	1.6558	1.5489	1.6114	1.4798	1.5176	1.5464	1.7819	1.8672		98	1.0936	1.1126	1.4962	1.5656	1.0392	1.3145	1.5364	2.0258	1.4773	1.4534	1.4032	1.2426	1.6773	1.009	1.1424	0.9099	1.114	1.2928	1.2863	1.9975
1.6325	0.215226	1.36346	0.405507		99	1.5919	1.5541	1.5458	2.1527	1.4446	1.6803	2.1797	1.2876	1.714	1.5725	1.5679	1.5119	1.6202	1.5223	1.5586	1.5026	1.5134	1.5426	1.8088	1.7784		99	1.2889	1.2357	1.2827	1.7953	1.1094	1.4302	1.3143	2.4706	1.4368	1.3167	1.097	1.0974	1.3938	1.1642	0.9625	1.0484	0.9959	1.1353	1.3434	2.3507
1.65099	0.224826	1.35342	0.37397		100	1.5704	1.5062	1.5762	2.123	1.4878	1.6805	2.3182	1.3307	1.7939	1.6937	1.6517	1.4996	1.6279	1.571	1.5172	1.5235	1.5418	1.5434	1.6744	1.7888		100	1.0826	1.1136	1.3495	1.7282	1.0552	1.4115	1.4942	2.39	1.4866	1.2247	1.1019	1.1126	1.429	1.0742	0.9981	0.9423	1.2523	1.2708	1.3939	2.1572
1.64814	0.251291	1.38907	0.439898		101	1.5959	1.5203	1.624	2.1052	1.4371	1.6975	2.4865	1.3756	1.7137	1.637	1.6133	1.5222	1.6952	1.5324	1.4545	1.4902	1.525	1.5316	1.6226	1.783		101	1.258	1.2206	1.2681	1.8068	0.9274	1.3373	1.459	2.2525	1.4262	1.3264	1.174	1.2186	1.5857	1.1534	1.0178	1.121	1.0552	0.9447	1.5102	2.7186
1.64367	0.240349	1.38799	0.343342		102	1.4928	1.5712	1.5841	2.1692	1.4821	1.7929	2.3269	1.2847	1.7133	1.5773	1.5294	1.4967	1.6832	1.562	1.4867	1.5358	1.5262	1.582	1.634	1.8429		102	1.1197	1.1948	1.3142	1.8814	0.961	1.3412	1.5011	2.2514	1.441	1.2868	1.1176	1.1873	1.6663	1.1076	1.3458	1.0257	1.2706	1.1558	1.5464	2.0441
1.64117	0.235999	1.33522	0.352996		103	1.5687	1.5573	1.6217	2.2009	1.5035	1.6852	2.3144	1.3684	1.6973	1.5783	1.5258	1.5026	1.7195	1.5514	1.4821	1.5071	1.4441	1.5199	1.6526	1.8227		103	1.1868	1.1249	1.1064	1.9637	1.1865	1.293	1.4018	2.3186	1.395	1.2496	1.206	1.0016	1.7757	1.0292	1.1281	1.0171	1.2088	0.9955	1.3891	1.7271
1.65665	0.232272	1.39792	0.376844		104	1.5697	1.586	1.6107	2.1671	1.498	1.6625	2.3526	1.3894	1.7254	1.5868	1.5634	1.5703	1.805	1.5083	1.4559	1.5284	1.5395	1.5568	1.6642	1.793		104	1.1062	1.3038	1.4612	2.2251	1.3048	1.3121	1.7758	2.1211	1.425	1.3882	1.0067	1.1312	1.699	1.0311	1.0144	1.1548	1.1508	0.9896	1.3687	1.9888
1.64283	0.224765	1.36439	0.393735		105	1.5535	1.5489	1.7262	2.1942	1.4799	1.7008	2.2258	1.3705	1.7022	1.6228	1.5364	1.4795	1.8022	1.5254	1.4842	1.4768	1.5096	1.4875	1.6834	1.7468		105	1.1655	1.3202	1.2334	2.4922	1.1801	1.1359	1.707	1.8984	1.4966	1.2918	1.0754	1.0396	1.5992	0.89	1.219	1.0239	1.2446	1.0772	1.2178	1.9799
1.64698	0.244812	1.41056	0.463864		106	1.5682	1.5603	1.7616	2.2753	1.5303	1.7415	2.3316	1.3381	1.6611	1.5318	1.5379	1.4872	1.6458	1.5118	1.4633	1.5123	1.5657	1.6076	1.6777	1.6304		106	1.1978	1.2001	1.1031	2.5306	1.399	1.3888	1.6123	2.1927	1.3421	1.2047	1.0725	1.1591	1.7982	1.0161	1.0559	0.8595	1.2928	1.1272	1.2854	2.3733
1.6665	0.24992	1.41193	0.437576		107	1.5623	1.5354	1.8306	2.2938	1.5168	1.7243	2.3754	1.4125	1.7298	1.6382	1.5503	1.4885	1.6626	1.5496	1.5676	1.4844	1.5142	1.5647	1.6132	1.7159		107	1.1043	1.1508	1.0933	2.3023	0.8678	1.3116	1.7968	2.3474	1.286	1.3477	1.0536	1.2283	1.9691	1.0355	1.0462	1.2672	1.3191	1.3249	1.3139	2.0728
1.68162	0.269761	1.42707	0.485419		108	1.5677	1.5414	1.7728	2.4084	1.4715	1.6485	2.3993	1.4433	1.7568	1.627	1.5704	1.5269	1.7691	1.5298	1.4373	1.5303	1.6085	1.5317	1.7135	1.7781		108	1.1832	1.2201	1.1963	2.4052	1.101	1.2903	1.5761	2.5575	1.3322	1.3748	0.9945	1.1167	2.2362	1.0125	1.1501	0.9067	1.4065	1.0651	1.4076	2.0089
1.6789	0.278745	1.43271	0.476998		109	1.5743	1.5434	1.8205	2.4367	1.5673	1.652	2.477	1.4024	1.6633	1.6167	1.5758	1.5365	1.6698	1.5632	1.5247	1.5312	1.6332	1.526	1.6646	1.5994		109	1.1238	1.1111	1.2314	2.089	0.8918	1.4023	1.6033	2.6182	1.3623	1.3237	1.2708	1.1449	1.9241	1.1432	1.0609	1.0608	1.2373	1.2241	1.3459	2.4853
1.69286	0.309852	1.47556	0.505303		110	1.4925	1.5168	1.8677	2.4347	1.506	1.8037	2.6419	1.483	1.7007	1.6708	1.5433	1.5504	1.6792	1.4843	1.5239	1.5277	1.6122	1.5373	1.615	1.6661		110	1.0962	1.233	1.1576	2.5251	1.0936	1.3636	1.7666	2.4199	1.1804	1.4416	1.2775	1.1724	2.4265	0.9322	0.9445	1.3323	1.2721	1.4302	1.2627	2.1832
1.71447	0.366253	1.40431	0.508569		111	1.4951	1.5399	1.9052	2.6116	1.528	1.8472	2.8044	1.3821	1.7301	1.5906	1.5475	1.5383	1.8337	1.5064	1.4646	1.5668	1.642	1.5473	1.651	1.5577		111	1.2232	0.9676	1.1798	2.5441	1.1372	1.4274	1.5906	2.6808	1.3708	1.4386	1.2884	1.1604	2.2909	0.9214	1.0213	1.0529	1.2465	0.9833	1.2185	1.3425
1.71591	0.334195	1.45337	0.562754		112	1.5755	1.5697	1.8852	2.6886	1.5023	1.844	2.5445	1.3539	1.7273	1.6181	1.5332	1.5695	1.7525	1.4832	1.4628	1.614	1.706	1.5501	1.6733	1.6644		112	1.2527	1.2179	1.0168	2.5381	1.3073	1.6517	1.5648	3.0357	1.2711	1.1365	1.0237	1.1685	1.8876	1.0169	1.0658	1.1464	1.2771	0.9012	1.354	2.2335
1.74189	0.325474	1.46454	0.529713		113	1.5958	1.5605	2.1128	2.6212	1.5462	1.8043	2.5793	1.4294	1.6726	1.6552	1.6121	1.5681	1.723	1.5742	1.5632	1.6094	1.7895	1.5162	1.6456	1.6592		113	1.2419	1.2804	1.0719	2.3802	0.9573	1.6399	1.6829	2.9357	1.4567	1.2887	1.1675	1.1268	2.2274	1.0781	0.9078	1.1201	1.3853	1.0423	1.4167	1.8831
1.79259	0.380646	1.38338	0.44346		114	1.548	1.647	2.4234	2.7666	1.5525	1.8856	2.6802	1.6068	1.7621	1.7743	1.5555	1.5945	1.723	1.5927	1.4494	1.5819	1.9008	1.5104	1.6409	1.6562		114	1.2813	1.0919	1.2782	2.1587	1.0359	1.3761	1.8235	2.5319	1.3196	1.4125	1.0572	1.0506	2.1565	0.9703	0.9814	1.1565	1.439	0.9754	1.3253	1.2458
1.79682	0.401475	1.45722	0.459311		115	1.542	1.6494	2.2404	2.9651	1.5699	1.9516	2.7342	1.5342	1.771	1.6965	1.6389	1.6088	1.8203	1.576	1.4659	1.5825	1.7545	1.5598	1.6953	1.58		115	1.2261	1.0916	1.2235	2.3955	1.1564	1.4658	1.6656	2.4598	1.3523	1.5417	1.2724	1.2662	2.274	1.1396	0.801	1.1636	1.4224	1.0539	1.2897	1.8833
1.76859	0.372347	1.43904	0.49886		116	1.5551	1.6215	2.3312	2.8256	1.5726	1.9412	2.502	1.4864	1.7299	1.676	1.5668	1.6029	1.9415	1.5473	1.4704	1.5221	1.8127	1.5179	1.589	1.5597		116	1.281	1.113	1.2038	2.8528	1.3005	1.4007	1.7271	2.3604	1.2744	1.3872	1.1446	1.0688	2.2353	1.0753	0.9402	1.1309	1.498	1.0716	1.5513	1.1639
1.79318	0.373999	1.41855	0.470866		117	1.5854	1.6605	2.3647	2.7357	1.5915	2.1206	2.6236	1.4793	1.6801	1.6478	1.5491	1.6273	1.8513	1.5503	1.5149	1.5883	1.9255	1.6107	1.5868	1.5703		117	1.2639	1.1172	1.1637	2.7096	1.0997	1.3086	1.6579	2.3489	1.3595	1.3988	1.3171	1.139	2.2171	1.0453	0.9419	1.1087	1.3849	1.0606	1.334	1.3945
1.83887	0.451173	1.43882	0.576101		118	1.5356	1.7883	2.5253	3.0441	1.6721	2.0898	2.7968	1.6148	1.6841	1.6539	1.5537	1.5566	1.8064	1.5718	1.4399	1.5828	2.1138	1.5502	1.6059	1.5915		118	1.1024	1.2717	1.2094	2.9701	1.1227	1.3446	1.9334	2.7445	1.3055	1.2328	1.1454	0.9804	2.2202	1.0434	1.1016	1.1435	1.5329	0.8958	1.2224	1.2536
1.85963	0.452188	1.56294	0.714565		119	1.6333	1.8663	2.6204	3.0358	1.6761	2.1761	2.7436	1.5685	1.6711	1.7099	1.5897	1.6656	1.8786	1.5235	1.4386	1.5888	2.1154	1.4803	1.6233	1.5876		119	1.2601	1.2428	1.2	3.5875	1.0169	1.5926	2.1739	3.0697	1.2597	1.5038	0.981	1.1654	2.1255	1.0284	0.9828	1.169	1.6175	0.9394	1.3304	2.0125
1.8721	0.509839	1.55898	0.665578		120	1.5809	1.8382	2.8157	3.0737	1.6571	2.1938	2.967	1.4594	1.7223	1.6909	1.6451	1.5895	1.9385	1.4952	1.3473	1.6178	2.0778	1.4693	1.6859	1.5766		120	1.2192	1.1426	1.0576	3.4247	1.0421	1.6323	2.4426	2.8684	1.4118	1.6124	1.4537	1.2443	2.1488	0.9767	0.9809	1.0853	1.4268	1.1151	1.5112	1.383
1.93253	0.49631	1.5024	0.629405		121	1.6577	2.0965	2.7412	2.9615	1.7216	2.312	2.9565	1.4782	1.6862	1.7633	1.7607	1.6925	1.9083	1.5592	1.391	1.7417	2.5335	1.5467	1.6174	1.5249		121	1.1699	1.2383	1.3608	3.5047	1.1548	1.3886	2.1278	2.4553	1.3657	1.4561	1.2842	1.2891	2.2336	1.0026	0.866	0.9147	1.3664	1.0865	1.2927	1.4903
1.94598	0.510736	1.49773	0.60129		122	1.6336	1.9635	2.9916	2.8524	1.7657	2.3405	2.8924	1.3417	1.6171	1.7573	1.7377	1.7408	1.934	1.6371	1.5145	1.6939	2.6952	1.5366	1.632	1.6421		122	1.1655	1.1596	1.3591	2.9862	1.1344	1.5605	2.2823	2.7326	1.2921	1.3973	0.9779	1.1192	2.3132	1.0131	0.8871	1.138	1.5901	1.0109	1.3576	1.4779
1.96932	0.550913	1.53736	0.618428		123	1.5911	2.2372	3.0823	3.0289	1.7632	2.3311	2.9616	1.4441	1.6745	1.8506	1.6784	1.8625	1.845	1.5596	1.5214	1.6498	2.6836	1.5037	1.6282	1.4897		123	1.3497	1.1389	1.6292	3.3101	1.1631	1.6331	2.2746	2.9056	1.3611	1.4805	1.139	1.2509	1.8129	1.1253	1.0519	1.1221	1.4412	1.0069	1.2851	1.2661
2.04007	0.604099	1.61872	0.700195		124	1.6688	2.5463	2.9735	3.2959	1.891	2.3344	3.0653	1.4564	1.6572	1.803	1.7514	1.7315	1.8801	1.5706	1.531	1.6339	3.075	1.65	1.6629	1.6233		124	1.3459	1.2146	1.6103	3.7052	1.2175	1.6053	2.7084	2.7227	1.3209	1.6038	1.1253	1.3113	2.0279	1.1034	0.826	1.1749	1.6852	0.9463	1.497	1.6226
2.01579	0.543476	1.64967	0.683186		125	1.6826	2.5093	2.8823	3.2501	1.898	2.3495	2.7848	1.3344	1.7875	1.6971	1.8738	1.8178	2.1084	1.5105	1.5494	1.7488	2.7273	1.5142	1.6878	1.6023		125	1.4685	1.1712	1.8039	3.6804	1.1942	1.5404	2.9153	2.4854	1.497	1.4979	1.1387	1.2411	1.991	1.0085	1.1552	1.0912	1.9031	1.1309	1.4321	1.6474
2.05043	0.529194	1.59459	0.537761		126	1.7259	2.7652	2.9852	3.0668	1.9351	2.3004	2.7843	1.4282	1.7273	1.9976	2.0073	1.9286	2.1647	1.5557	1.3851	1.7689	2.6206	1.5428	1.7052	1.6137		126	1.3524	1.2697	1.9546	3.0547	1.1758	1.5788	2.4257	2.4169	1.3375	1.5648	1.0875	1.3688	2.0119	0.9465	1.1055	1.3832	1.4845	1.1318	1.4699	1.7713
2.08473	0.570473	1.59161	0.564321		127	1.7595	2.8256	3.0641	3.093	2.0249	2.4962	3.0245	1.3501	1.8184	1.8778	1.8559	2.1303	2.1093	1.615	1.3779	1.7334	2.6487	1.5659	1.6576	1.6664		127	1.3797	1.1655	1.993	2.9101	1.1048	1.5893	2.5394	2.6251	1.3014	1.412	1.1265	1.3584	1.9997	0.958	1.004	1.2654	1.7677	1.1756	1.3438	1.8128
2.0977	0.540975	1.6375	0.63014		128	1.8603	3.0033	3.0501	2.8169	2.223	2.3985	2.834	1.3503	1.9238	1.7764	1.9558	2.0987	2.0262	1.6178	1.3639	1.7631	2.8115	1.5986	1.7452	1.7366		128	1.2068	1.1776	2.2059	3.3367	1.0672	1.5277	2.5199	2.5925	1.6538	1.3932	1.2812	1.3063	1.8674	1.081	1.1365	1.3556	2.1711	0.938	1.2578	1.6739
2.15984	0.590654	1.61678	0.627877		129	1.9631	3.0731	3.1659	3.128	2.2172	2.3793	2.7941	1.4513	1.7343	1.8379	2.272	2.0677	2.3368	1.5393	1.4878	1.8072	3.016	1.5486	1.7179	1.6594		129	1.3565	1.2471	1.9027	3.2371	1.0325	1.496	2.4827	2.5577	1.2338	1.5653	1.1295	1.3552	2.5096	1.1147	0.9411	1.5197	1.8758	1.0091	1.1934	1.5761
2.18946	0.626938	1.68038	0.66192		130	1.9751	3.2126	3.6066	3.0042	2.1017	2.5291	2.8415	1.3382	1.7125	1.8335	2.0911	2.1114	2.4068	1.6756	1.544	1.8061	2.883	1.7256	1.6743	1.7163		130	1.4707	1.3005	1.882	3.3221	1.0687	1.5097	2.7804	2.606	1.2638	1.628	0.9615	1.3917	2.4885	1.0546	0.9533	1.5631	2.1875	1.2795	1.3048	1.5912
2.17153	0.594507	1.64398	0.751329		131	1.9408	3.2288	3.1137	3.2723	2.269	2.5923	2.6865	1.318	1.8224	1.8375	2.3042	2.1037	2.2089	1.7091	1.5208	1.8567	2.7743	1.6357	1.555	1.681		131	1.3553	1.3128	2.104	3.8358	1.0359	1.5525	2.5005	2.7247	1.2017	1.4699	1.1122	1.2608	1.9641	0.9648	0.888	1.4658	2.5048	1.0134	1.1518	1.4608
2.21263	0.629211	1.66762	0.73983		132	1.9556	3.1995	3.2304	3.3325	2.133	2.4524	2.9405	1.3525	1.7932	1.8843	2.6628	2.4273	2.1398	1.5977	1.4782	1.772	2.8337	1.6916	1.6633	1.7122		132	1.4359	1.384	2.3122	3.7332	1.24	1.5093	2.6187	2.8133	1.2238	1.3208	1.279	1.2586	1.9031	1.0234	0.9054	1.3623	2.4775	1.0979	1.1588	1.2952
2.30533	0.678705	1.7787	0.797819		133	1.9744	3.4484	3.2869	3.4866	2.2894	2.6346	2.8551	1.2805	1.9289	1.877	2.805	2.6081	2.4226	1.6018	1.4544	2.0059	2.9855	1.5841	1.8612	1.7163		133	1.5363	1.7162	2.527	3.3387	1.3273	1.6571	2.5486	3.1042	1.5932	1.3587	1.0766	1.2728	1.9741	1.0358	0.9934	1.3959	3.518	0.9452	1.2065	1.4485
2.34471	0.667308	1.83532	0.831844		134	2.1139	3.2173	3.6272	3.376	2.4681	2.6384	3.0738	1.3428	1.834	1.9036	2.7813	2.515	2.5156	1.6683	1.4814	2.0165	2.939	1.7133	1.753	1.9157		134	1.5803	2.0037	2.7022	3.5734	1.4159	1.581	2.8761	3.2439	1.5356	1.6008	1.1098	1.2818	1.6022	1.0776	0.8947	1.5808	3.3073	0.9381	1.2158	1.5854
2.34356	0.686477	1.82126	0.769202		135	2.0742	3.4061	3.6689	3.0931	2.2856	2.6981	2.9728	1.3007	1.7768	1.8522	2.944	2.6573	2.6088	1.6396	1.4629	1.8829	2.999	1.779	1.6892	2.0799		135	1.7186	1.9764	2.4433	3.6366	1.2882	1.4716	2.6626	2.7894	1.5138	1.4982	1.4063	1.5466	1.9416	0.9732	0.9245	1.6696	3.3265	0.9866	1.2467	1.405
2.34875	0.669832	1.87566	0.894891		136	2.2295	3.2434	3.4262	3.1815	2.2968	2.7039	3.1487	1.3488	1.8196	1.8977	3.141	2.6885	2.4917	1.6547	1.6095	1.8364	3.015	1.7044	1.6743	1.8634		136	1.4948	2.0423	2.4436	3.8886	1.1944	1.4185	2.7179	2.4711	1.4606	1.6238	1.5832	1.6486	1.9909	1.0369	1.0537	1.5473	4.2436	0.9617	1.1807	1.511
2.36099	0.601295	1.84416	0.801358		137	2.2647	3.1952	3.2306	3.1638	2.4341	2.7187	2.9924	1.4473	1.7698	2.0917	3.0251	2.7208	2.4926	1.7146	1.7333	1.8047	2.9692	1.7438	1.8418	1.8657		137	1.4687	2.2015	2.6615	3.2949	1.2578	1.6902	3.0382	2.8808	1.6246	1.3716	1.3984	1.4479	1.8847	1.1214	0.8494	1.5984	3.5066	1.0005	1.3562	1.2299
2.42876	0.679371	1.9062	0.849128		138	2.153	3.5393	3.365	3.0453	2.3204	2.727	3.2385	1.4241	1.7586	2.156	3.254	2.928	2.5711	1.7389	1.709	1.825	3.2259	1.7645	1.8828	1.9488		138	1.5388	2.7197	2.6426	3.7849	1.4203	1.8049	2.6661	3.1913	1.4415	1.769	1.3492	1.4767	1.9291	1.0005	0.9185	1.5715	3.3551	1.0427	1.1681	1.3336
2.44819	0.655389	1.96213	0.904526		139	2.1927	3.4115	3.3135	3.3664	2.4501	2.5981	3.2325	1.3899	1.8672	2.1157	3.1324	2.9914	2.5532	1.7788	1.6844	1.9712	3.1428	1.7828	1.9802	2.009		139	1.6814	2.6425	2.7027	3.7293	1.4966	1.8342	2.5718	3.2455	1.4045	1.8342	1.375	1.2402	2.0584	1.0385	0.9579	1.5888	4.0488	1.1034	1.2388	1.4502
2.47414	0.660031	1.94259	0.889122		140	2.3831	3.3964	3.5078	3.3478	2.6011	2.7078	2.892	1.3858	1.9165	2.0989	3.2996	3.0459	2.7274	1.8073	1.609	1.9649	2.9486	1.7063	1.9341	2.2025		140	1.9347	2.7659	2.4033	3.6307	1.3989	1.822	2.47	3.1567	1.5073	1.5248	1.611	1.3885	2.1743	1.0221	0.8271	1.6064	4.0497	1.0863	1.1769	1.2951
2.48175	0.636307	2.02474	0.891067		141	2.3501	3.3194	3.3407	3.3443	2.6966	2.6508	2.7348	1.42	1.9299	2.0988	3.5256	3.1016	2.7355	1.9399	1.7435	1.8387	2.922	1.8875	1.9157	2.1396		141	1.8526	3.0069	2.5256	3.3104	1.4886	1.9826	2.4567	3.6648	1.4834	1.7047	1.9211	1.4854	2.5662	1.0453	1.004	1.5491	3.9102	0.9168	1.2878	1.3326
2.47411	0.691989	2.02106	0.845642		142	2.3153	3.5807	3.2343	3.6112	2.4363	2.5096	2.9122	1.4024	1.8308	1.9033	3.2585	3.5092	2.7399	2.0243	1.7004	1.7787	2.7775	1.826	2.126	2.0056		142	1.9847	2.9492	2.9028	3.2107	1.5465	1.8381	2.6949	3.4698	1.5006	1.5995	2.0421	1.4771	2.4583	1.0911	1.0334	1.4944	3.5937	1.0192	1.149	1.3662
2.49121	0.692408	1.98999	0.845718		143	2.139	3.3292	3.4464	3.764	2.5423	2.4205	2.8584	1.4679	1.7766	1.9984	3.2482	3.3124	2.9527	2.0366	1.5441	1.8523	2.9559	1.8587	2.1516	2.1691		143	1.7992	3.0374	2.479	3.1868	1.4691	1.6809	2.959	3.5477	1.5947	1.732	1.9763	1.4095	2.3523	1.1602	1.0757	1.3405	3.5172	1.0726	1.1422	1.2675
2.61406	0.674213	2.00987	0.891419		144	2.2251	3.6618	3.5137	3.2128	2.717	2.4485	3.1481	1.4364	1.9557	2.1852	3.5676	3.5262	3.0262	2.0234	1.733	2.0508	3.0178	2.1525	2.2615	2.4178		144	1.9241	3.0101	2.3894	3.4679	1.5033	1.6649	2.679	3.5954	1.5624	1.5474	2.1686	1.4414	2.3299	1.0342	0.938	1.404	3.8372	1.1974	1.2617	1.241
2.5894	0.574829	2.04234	0.864317		145	2.1914	3.5455	3.3381	3.3048	2.6274	2.5477	2.864	1.3974	2.0825	2.4173	3.0733	3.337	2.9181	2.139	1.842	2.0325	3.0491	2.3874	2.2988	2.3946		145	2.3692	3.2802	2.4267	3.358	1.6678	1.812	2.4283	3.5815	1.4752	1.7772	2.1612	1.5183	2.5152	1.021	0.9728	1.335	3.5216	0.9879	1.2046	1.4331
2.62196	0.54083	2.09199	0.882077		146	2.3981	3.3307	3.325	3.3243	2.6616	2.7527	2.8664	1.5493	2.0724	2.3627	2.9539	3.4603	3.0514	2.3673	1.8941	2.1086	3.0514	2.107	2.4915	2.3105		146	2.2326	3.0028	2.5278	3.1558	1.9734	2.0725	2.7771	4.3261	1.5101	1.8492	2.0801	1.5833	2.6488	1.0533	1.1234	1.3833	3.064	0.9386	1.1665	1.3711
2.68563	0.621182	2.20003	0.98535		147	2.3572	3.4956	3.6154	3.9945	2.5151	2.6149	2.7417	1.5073	2.034	2.3145	3.1338	3.2895	3.0372	2.5441	2.0188	1.8298	2.908	2.4584	2.7296	2.5733		147	2.0647	3.3496	2.6766	3.7903	1.8888	1.9961	2.8488	4.3811	1.4206	1.902	2.7055	2.1335	2.6852	1.0135	1.0346	1.4246	3.2413	0.9363	1.2096	1.2979
2.6539	0.597092	2.16918	0.945924		148	2.2413	3.3753	3.5844	3.8414	2.615	2.5288	2.6882	1.5002	2.1239	1.9964	3.0231	3.0446	2.9359	2.3986	2.1217	1.9523	3.2258	2.5007	2.9921	2.3882		148	2.1953	3.4987	2.2804	3.5125	1.5407	1.9051	2.9121	4.1052	1.3537	1.6371	2.812	2.4069	2.8496	1.0943	0.8866	1.5598	3.1339	1.0714	1.3272	1.3012
2.72448	0.597375	2.1878	0.954815		149	2.3356	3.4546	3.4822	3.5245	2.75	2.6304	2.4989	1.5679	2.0845	2.1217	3.3064	3.6258	3.0729	2.7486	2.112	2.0065	3.3178	2.5491	2.927	2.3732		149	2.089	3.1368	2.2595	3.6687	1.6413	1.8186	2.6547	4.019	1.3801	1.7458	2.2769	2.8794	3.5013	1.0084	0.9662	1.8674	3.259	1.0366	1.3676	1.1797
2.71187	0.541389	2.27628	1.051		150	2.3382	3.5751	3.1616	3.2528	2.6347	2.663	2.7236	1.454	1.9494	2.4499	3.5297	3.0689	3.0089	2.7599	2.3972	1.9486	2.8222	2.6267	3.2969	2.5761		150	1.7975	3.1846	2.4324	3.8274	1.6891	2.017	2.5283	4.5794	1.464	1.939	2.7032	2.9938	3.6131	1.0786	1.2168	1.3557	3.5133	1.0774	1.3514	1.1637
2.71176	0.554255	2.28019	1.07303		151	2.4163	3.3159	3.2654	3.2796	2.4609	2.5194	2.8309	1.4935	2.0399	2.2433	3.4976	3.177	3.2368	2.679	2.0878	1.9864	3.0777	2.9909	3.1543	2.4826		151	2.0182	3.5119	2.4952	3.267	1.6193	2.0984	2.3649	4.5829	1.6044	1.7109	2.691	3.3959	4.0144	1.0535	0.9261	1.573	3.1381	0.9673	1.2044	1.367
2.76678	0.597638	2.26015	1.0546		152	2.5981	3.7784	3.2372	3.5581	2.4751	2.7032	2.8907	1.6384	2.1042	2.2914	3.4829	2.9577	3.2785	2.6961	1.999	1.8817	3.1879	2.9967	3.2506	2.3298		152	2.1596	3.4043	2.6118	2.843	1.6452	2.0305	2.6839	4.4049	1.6032	1.4706	2.9233	3.9741	3.2051	1.1803	0.9436	1.5	3.351	0.9516	1.2139	1.103
2.8505	0.664201	2.2992	1.10912		153	2.4639	3.6502	3.1443	4.1126	2.5419	2.7222	2.7775	1.5486	2.2769	2.0969	3.8134	3.2341	3.2346	2.8568	2.5038	1.8016	3.462	3.0332	3.2889	2.4465		153	2.417	3.5391	2.4381	3.4702	1.5791	2.2063	2.458	4.9861	1.4018	1.5022	3.211	3.4295	3.0473	1.1097	0.9077	1.3401	3.2266	1.3384	1.3021	1.0738
2.85056	0.601621	2.26873	1.03559		154	2.4867	3.2213	3.216	3.8796	2.8873	2.4902	2.7336	1.5837	2.1819	2.3378	3.3918	3.1721	3.3681	3.0815	2.3274	1.9895	3.4075	3.1947	3.634	2.4265		154	2.0381	3.911	2.5312	3.8577	1.57	1.9743	2.5442	3.9697	1.5246	1.7069	2.8998	2.9222	3.5961	1.1235	1.0116	1.4242	3.2098	1.1041	1.3219	1.1337
2.87348	0.630885	2.28404	1.05454		155	2.7446	3.3668	3.5552	3.6906	2.8306	2.3505	2.8618	1.6015	2.2082	2.2278	3.7982	3.1136	3.4137	2.8114	2.1599	2.0985	3.4392	3.1308	3.6084	2.4583		155	2.4003	3.6158	2.7732	3.9422	1.3806	1.8497	2.6298	3.8951	1.4664	1.815	3.1372	3.1646	3.8165	1.1366	0.8473	1.5074	2.7662	1.149	1.2703	1.1176
2.91251	0.629188	2.39183	1.10014		156	2.6727	3.3433	3.4085	3.4933	2.6851	2.6556	3.2148	1.5469	2.3667	2.1667	3.7317	3.1794	3.4956	2.8878	2.3257	1.924	3.4439	3.442	3.7259	2.5405		156	2.4494	3.3854	2.5766	3.5421	1.4288	2.0013	2.6441	4.1307	1.4199	1.9183	3.4646	3.6419	4.1205	1.1995	1.1204	1.189	3.6517	1.1803	1.5391	1.233
2.92156	0.621891	2.35437	1.11729		157	2.5093	3.3789	2.9953	3.5305	2.8319	2.5227	3.211	1.5576	2.4362	2.0935	3.9262	3.224	3.2109	2.9982	2.3466	2.0038	3.4914	3.6327	3.5206	3.0099		157	2.0183	3.4257	2.6557	3.5725	1.7495	2.0567	2.3989	4.159	1.4372	1.4565	3.5878	3.4441	4.1267	1.2228	1.0929	1.3255	3.7075	1.0857	1.2478	1.3165
2.94557	0.631337	2.27671	1.07362		158	2.6914	3.4141	3.1774	3.685	2.5711	2.4357	2.8103	1.7425	2.2522	2.3135	3.5778	3.5777	3.4361	3.0354	2.3079	2.0471	3.9406	3.6146	3.4293	2.8516		158	2.0609	3.2692	2.5843	3.5555	1.4883	2.0105	2.4702	3.742	1.268	1.5123	3.0865	3.6707	4.062	1.3315	1.15	1.4132	3.5908	1.0546	1.1702	1.0435
2.91919	0.600154	2.32004	1.06746		159	2.5526	3.3789	3.2582	3.6559	2.8595	2.5266	2.7116	1.6904	2.1407	2.4687	3.2517	3.1894	3.4031	3.0769	2.3636	2.1054	3.7307	3.7239	3.646	2.6499		159	1.8101	3.3202	2.8838	3.8642	1.6119	1.8251	2.3027	4.2314	1.2833	1.9012	2.6728	3.6676	3.7254	1.4533	1.1937	1.3488	3.5688	1.179	1.5324	1.0252
2.98834	0.644418	2.33793	0.991153		160	2.6617	3.5121	3.5471	3.6168	2.9162	2.6871	2.6703	1.5423	2.0817	2.522	3.2991	3.3888	3.606	3.0368	2.541	2.1916	3.5397	3.7638	3.9815	2.6612		160	1.9069	3.3316	2.6922	3.6961	1.5157	1.7259	2.3074	3.6466	1.3085	2.2098	3.3575	3.9796	3.2994	1.6201	1.2157	1.2184	3.4285	1.3134	1.8966	1.0886
2.96223	0.604975	2.33548	1.04324		161	2.4828	3.452	3.1058	3.7953	2.8738	2.6962	2.6893	1.6025	2.1279	2.6725	3.3467	3.122	3.4864	3.0463	2.5363	2.1994	3.8457	3.7638	3.5413	2.8587		161	2.0963	3.3638	2.2237	4.1019	1.3428	1.9001	2.2795	3.8004	1.1974	1.777	3.3336	3.7879	3.4705	1.562	1.181	1.405	3.6202	1.3398	1.7337	1.193
2.96313	0.680934	2.3456	1.12721		162	2.3329	3.4589	3.0043	4.1938	2.9434	2.5086	2.6599	1.4223	2.0991	2.597	3.6248	3.1198	3.7988	3.1285	2.6237	2.1224	3.7585	3.5788	3.2143	3.0727		162	2.0265	3.1196	2.0655	4.1671	1.4591	1.7838	1.9562	3.9484	1.2026	1.817	3.2453	3.8617	4.4008	1.61	1.0888	1.3426	3.5399	1.2936	1.7971	1.1864
2.98215	0.703106	2.34698	1.05722		163	2.5685	3.5176	3.1577	4.0284	3.0112	2.465	2.6307	1.3863	2.1616	2.5072	3.4796	3.5465	3.6477	2.881	2.6669	1.9893	3.5586	3.9978	3.6624	2.779		163	2.2827	3.3082	2.2363	3.605	1.5417	1.9461	2.4167	4.0408	1.3532	1.7102	3.3532	3.8188	4.1329	1.8151	0.9995	1.2129	3.1094	1.1446	1.824	1.0884
2.98943	0.679738	2.55091	1.09451		164	2.5332	3.3617	2.8621	3.9993	3.0989	2.3881	2.9377	1.4179	2.4513	2.3953	3.8428	3.4372	3.91	2.8696	2.4912	2.1181	3.6343	3.5503	3.5974	2.8922		164	2.9961	2.9995	2.3997	3.7701	1.607	2.1223	3.116	4.2632	1.462	1.7585	4.3461	3.9189	4.0274	2.0214	1.337	1.3241	3.0681	1.365	2.0744	1.0413
2.95141	0.627987	2.57295	1.17217		165	2.5409	3.476	2.8423	3.6528	3.2913	2.5522	2.7396	1.4781	2.3491	2.4119	3.554	3.155	3.5207	3.054	2.3945	2.0807	3.7164	3.4871	3.8006	2.9309		165	2.3092	3.1976	2.3864	4.6868	1.4243	2.0106	2.5446	4.359	1.4715	1.8633	4.1532	3.8015	4.3832	2.2403	1.3197	1.475	3.221	1.3378	2.2419	1.0321
2.988	0.656904	2.50153	1.02116		166	2.5961	3.7331	3.2113	3.55	3.3192	2.8011	2.6066	1.4669	2.2968	2.4145	3.4525	3.2121	3.2717	3.0012	2.3911	2.0834	3.9478	3.4595	4.0109	2.9342		166	2.3236	3.2183	2.4855	3.9173	1.4813	2.0871	2.6723	4.17	1.3148	1.7891	3.8057	3.9629	3.9407	2.2351	1.5349	1.4394	3.0435	1.3405	1.8931	1.3755
3.00766	0.641124	2.45466	0.96942		167	2.7047	3.7461	3.0276	3.1723	3.4249	2.7957	3.0865	1.4948	2.2928	2.5906	3.1762	3.4948	3.3319	2.9488	2.1373	2.1395	3.9762	3.4181	3.9571	3.2373		167	2.3832	3.2049	2.738	3.4801	1.503	1.9998	2.6343	4.6935	1.3646	1.8312	3.2141	4.128	3.1559	2.1927	1.7762	1.3723	2.777	1.449	1.9643	1.2311
3.0228	0.660004	2.49537	0.986692		168	2.5984	3.835	2.8377	3.3656	3.4053	2.4085	3.0086	1.5277	2.2629	2.7763	3.3001	3.5979	3.7111	2.9706	2.2638	2.1638	3.8196	3.6031	3.8622	3.1378		168	2.431	2.96	2.6091	3.2715	1.3568	1.957	2.7577	4.4375	1.5922	1.9448	3.6578	4.1853	3.6017	2.0459	1.8159	1.2869	3.2593	1.3512	2.1291	1.2566
2.96245	0.65005	2.48477	0.8437		169	2.5986	3.6947	2.9225	3.4683	3.4127	2.4564	2.6813	1.5241	2.176	2.9191	3.2058	3.5906	3.6725	3.1155	2.3536	1.8712	3.7139	3.4068	3.6934	2.772		169	2.7848	2.7601	2.8232	3.1474	1.5232	1.9607	2.747	3.5986	1.5335	1.9781	3.5109	3.282	4.3304	2.1854	1.7291	1.3421	3.0724	1.5629	2.2449	1.5786
3.02041	0.699346	2.54314	0.910897		170	2.7858	3.5438	3.0026	3.5855	3.5645	2.4653	3.0012	1.4215	2.2436	2.5343	3.5735	3.5978	3.9629	2.9247	2.1201	2.0022	3.8351	3.4809	3.6291	3.1338		170	2.9114	2.786	2.8132	3.1588	1.4767	1.859	2.8106	3.9222	1.558	1.7297	3.4681	3.556	4.4783	2.2145	2.0712	1.301	3.3621	1.7635	1.9811	1.6414
3.04632	0.731732	2.46567	0.850142		171	2.9664	3.4882	2.938	4.1069	3.619	2.5027	2.6945	1.4506	2.3075	2.4853	3.3573	3.4631	3.815	2.8777	2.3729	2.0424	4.3836	3.1161	3.7681	3.1712		171	3.0231	2.8622	2.3192	2.917	1.4606	1.8564	2.195	3.9847	1.512	1.8407	3.0202	3.6339	4.128	2.0989	2.0176	1.2536	3.3806	1.9219	1.7715	2.1162
3.04462	0.734834	2.51807	0.886018		172	2.9281	3.3282	2.8793	3.6544	3.6876	2.6354	2.84	1.5194	2.2849	2.543	3.1799	3.4907	3.8673	2.8799	2.3576	1.9878	4.5811	2.9607	4.087	3.2001		172	2.7104	2.7115	2.4538	3.0504	1.6519	1.9952	2.8069	3.9015	1.498	1.7834	3.201	3.5552	4.7478	2.2946	2.0189	1.1542	3.0204	1.8607	1.9604	1.9852
3.09853	0.791665	2.57413	0.859823		173	3.012	3.4122	3.1254	4.1323	3.8457	2.5737	2.8756	1.392	2.3357	2.4896	3.7026	3.5055	3.4593	2.9509	2.2221	1.9756	4.5179	3.1622	4.2178	3.0626		173	3.0045	2.5905	2.5151	3.7628	1.6054	1.9875	2.8231	3.8724	1.5614	1.7509	3.5696	3.3359	4.2883	2.1513	1.9663	1.2237	2.9693	1.8552	2.452	2.1975
3.09113	0.761727	2.66761	0.904884		174	2.9519	3.3736	2.9196	4.0135	3.5251	2.4555	2.9783	1.3966	2.3193	2.9735	3.6658	3.4225	3.7429	3.0029	2.2532	2.058	4.231	3.2007	4.4869	2.8518		174	3.0281	2.6691	2.3987	3.8394	1.6195	2.0053	3.272	4.5856	1.6444	2.0218	3.3079	3.6331	4.1694	2.5009	2.0363	1.4393	2.9384	1.7068	2.4786	2.0576
3.06689	0.726851	2.63162	0.885302		175	2.628	3.4263	2.9663	3.6582	3.877	2.5306	2.8966	1.4534	2.2792	2.877	3.7893	3.3044	3.7734	2.9531	2.325	2.3376	4.0272	3.0665	4.4484	2.7202		175	2.7818	2.4934	2.3772	3.6276	1.4564	1.9214	2.6516	4.4319	1.5323	1.9973	3.6636	3.6304	4.1574	2.7143	1.9226	1.4726	2.9024	1.8215	2.7183	2.3583
3.10852	0.75601	2.64059	0.888043		176	2.9894	3.6764	3.0364	3.7965	3.8093	2.5436	2.6871	1.4477	2.315	2.7242	3.9656	3.1938	3.4166	2.9643	2.3581	2.1649	4.503	3.2829	4.2192	3.0764		176	2.8276	2.6943	2.6949	3.45	1.4046	1.8292	2.3202	4.0149	1.709	1.9803	4.4837	3.4793	3.8178	2.6317	1.9333	1.4711	3.3897	1.8628	2.7075	2.1099
3.1067	0.814081	2.52799	0.732553		177	3.0029	3.6765	3.2554	4.2356	3.621	2.365	2.7176	1.363	2.2839	2.5812	3.4517	3.1747	3.3121	2.9165	2.413	2.0548	4.6509	3.1713	4.4025	3.4844		177	2.5575	2.7203	2.3022	3.8534	1.4757	1.8648	2.5005	3.6595	1.7512	2.0553	3.7091	3.204	3.203	2.5284	2.0848	1.3571	3.008	1.8528	2.6782	2.194
3.10338	0.783323	2.63594	0.796697		178	3.0368	3.6826	3.2161	4.0976	3.8074	2.5057	2.7614	1.3093	2.2327	2.6336	3.5591	3.1623	3.3575	3.1158	2.4665	2.1081	4.6042	3.0333	4.206	3.1715		178	3.0412	2.7517	2.4653	3.9764	1.4865	2.0039	2.609	3.98	1.7314	1.9728	3.4007	3.3019	3.7023	2.6251	2.1165	1.331	3.3718	1.925	2.5759	2.3504
3.15986	0.835994	2.63484	0.826379		179	3.4112	3.8812	3.136	3.9517	3.5181	2.3725	2.9131	1.3075	2.4243	2.7203	3.8631	3.3609	3.4744	3.0891	2.356	1.8103	4.8789	3.2526	4.159	3.317		179	3.1235	3.0828	2.8176	4.0021	1.4422	1.9168	2.3967	4.0665	1.7464	1.6756	3.1457	3.5496	3.5731	2.3824	2.2926	1.3171	3.1698	1.8032	2.635	2.5581
3.14747	0.847231	2.51771	0.745652		180	3.1947	3.7516	3.2196	3.6217	3.6687	2.6679	3.0276	1.3221	2.287	2.7027	3.5936	3.1807	3.4468	3.0708	2.3013	1.8302	5.1741	3.1615	4.2966	3.4302		180	2.8421	3.1721	2.638	3.7341	1.446	1.9226	2.6797	3.7134	1.7929	1.4306	2.8706	3.4118	3.3122	2.4858	1.9879	1.3109	2.7893	1.8556	2.3029	2.6558
3.0992	0.762096	2.5658	0.709464		181	2.9681	3.5945	3.5036	3.5793	3.4983	2.3626	2.8522	1.3321	2.1699	2.5311	3.4289	3.2979	3.5688	3.2845	2.5176	2.0531	4.6279	3.2681	4.0875	3.4581		181	2.8242	3.1671	2.5963	3.4184	1.4483	1.8326	2.3771	3.619	1.6952	1.7395	2.6565	3.5024	3.4455	2.8416	2.1526	1.4319	3.3284	2.0664	2.5101	2.6628
3.08506	0.725946	2.6238	0.767881		182	3.0136	3.6829	3.5693	3.6525	3.4442	2.4366	2.8447	1.3465	2.2853	2.7669	3.2267	3.4001	3.6498	2.931	2.3729	2.032	4.2364	3.0587	4.0615	3.6896		182	2.8195	3.1174	2.4012	3.5548	1.3683	1.9434	2.3214	3.9907	1.6599	1.9364	3.2772	3.6198	3.6922	2.8061	2.2704	1.5247	3.1765	2.0597	2.5206	2.4157
3.14145	0.77717	2.61548	0.783765		183	3.419	3.7054	3.3214	3.606	3.8494	2.5228	2.5484	1.2609	2.3287	2.8457	3.5914	3.4652	3.3682	3.0009	2.2522	2.0943	4.1951	3.2445	4.2919	3.9176		183	3.2463	2.9753	2.63	3.8762	1.6633	1.869	2.1734	3.957	1.7151	1.6514	3.4355	3.6746	3.4545	2.6775	2.0961	1.5147	2.6422	2.0309	2.448	2.5785
3.12203	0.729527	2.59074	0.77943		184	3.0934	3.752	2.9491	3.7778	3.9741	2.7932	2.5129	1.3883	2.4559	2.788	3.6531	3.2613	3.4339	3.0031	2.3092	2.1652	4.3366	3.1884	4.0183	3.5869		184	2.8256	2.824	2.3955	3.6404	1.7881	2.0931	2.3304	4.2979	1.6956	1.8182	3.1145	3.946	3.3511	2.718	2.1243	1.3231	2.7495	1.9571	2.41	2.4123
3.08188	0.710267	2.64299	0.752303		185	3.0473	4.0021	3.0616	3.9216	3.912	2.7612	2.7408	1.4075	2.427	2.7142	3.4452	3.1698	3.5577	3.0121	2.103	2.1127	4.0727	3.1613	3.7712	3.2367		185	2.7952	2.6927	2.3926	3.1335	1.8545	2.2235	2.6841	4.359	1.7727	1.8969	3.0777	3.7577	3.3806	2.7005	1.9981	1.4339	3.6532	1.9567	2.5435	2.5532
3.16026	0.747145	2.7549	0.765449		186	3.2786	3.7999	3.2312	3.7199	4.0773	2.6413	2.5802	1.3812	2.3748	2.9518	3.4277	3.4155	3.5122	3.2896	2.3372	2.0907	4.4311	3.1734	4.0566	3.4349		186	2.9012	2.7893	2.8037	3.3488	1.9259	2.0027	2.7044	4.4372	1.7899	2.1464	3.2437	3.8091	4.0143	2.7198	2.1559	1.6161	3.3483	2.1779	2.461	2.7025
3.23602	0.859117	2.68644	0.707056		187	2.9998	3.4705	3.4361	3.9936	3.88	2.5893	2.5787	1.3235	2.5448	3.184	3.9772	3.386	3.8791	3.0893	2.2845	2.0405	5.079	3.1462	4.2478	3.5905		187	2.5017	2.9901	2.6689	3.3157	1.9999	1.9375	2.2652	3.7246	1.8614	2.7651	2.9095	3.9824	3.6928	2.4472	1.9314	1.6529	3.5242	2.0915	2.2315	3.2354
3.15263	0.820876	2.64335	0.623449		188	2.9362	3.5804	3.3756	3.7822	3.6411	2.6099	2.6319	1.2317	2.3099	2.7802	4.2506	3.1394	3.7518	2.8888	2.3014	2.1318	4.6445	3.2506	3.8416	3.9729		188	2.8599	3.1747	2.8032	3.6978	1.973	1.8884	2.0769	3.2221	1.7584	2.6166	3.0102	3.5129	3.4869	2.7496	2.0721	1.6929	3.0379	2.0593	2.3493	2.8249
3.14377	0.729247	2.67053	0.613898		189	3.1147	3.6691	3.2285	3.6622	3.8257	2.6016	3.0992	1.3311	2.4518	2.6863	3.8737	3.3239	3.5944	3.2242	2.2931	2.0113	4.4215	3.3115	3.6048	3.5468		189	3.2351	2.9124	2.8028	3.4141	2.2057	1.9392	2.2912	3.7436	1.7606	2.4506	3.4273	2.8964	3.6418	2.7337	2.3032	1.6295	2.9487	2.0923	2.3805	2.602
3.23139	0.73139	2.75016	0.596273		190	3.2636	3.5478	2.9899	3.7652	3.7656	2.4672	3.2918	1.4367	2.6813	3.0089	4.1674	3.5442	3.6508	3.2114	2.4796	2.0584	4.4389	3.2029	3.7549	3.9014		190	2.8828	2.9115	3.148	3.1623	2.2659	1.8327	2.5266	3.9012	1.8345	2.5159	3.3485	3.2712	3.5172	2.6443	2.3329	1.6651	2.992	2.4351	2.5533	3.2621
3.10911	0.717014	2.73968	0.589468		191	2.8289	3.4364	3.3459	3.5009	3.5469	2.4888	2.9063	1.319	2.6821	2.6907	3.8732	3.2768	3.8272	3.0248	2.3906	2.0976	4.2342	2.9516	3.7394	4.0209		191	2.6585	2.9342	2.7466	2.9896	2.383	1.9052	2.2149	3.962	2.0972	2.4972	3.28	3.6573	3.5082	2.7167	2.2742	1.905	3.3027	2.1904	2.4946	3.0761
3.23152	0.810862	2.67564	0.553909		192	3.1705	3.5125	3.3027	3.8637	3.6632	2.5251	3.0794	1.4174	2.4968	2.6999	4.2223	3.5748	3.7493	3.2028	2.4061	1.9521	4.7768	3.1641	3.66	4.1909		192	2.9046	2.925	2.6198	3.2825	2.2748	1.8232	2.3788	3.4043	1.8878	2.4153	3.6258	3.2048	3.3303	2.7402	2.3116	1.7586	3.1206	2.0946	2.5996	2.8106
3.18495	0.758875	2.66318	0.517811		193	3.1131	3.7723	3.107	3.9956	3.5275	2.6463	2.822	1.4051	2.7241	2.8331	3.9615	3.317	3.874	2.9694	2.3353	1.9679	4.571	3.4857	3.3879	3.8833		193	2.9144	2.9332	2.4515	3.1761	2.3834	1.7743	2.4654	3.6771	1.982	2.4361	2.9572	3.3145	3.4999	2.691	2.4621	1.9175	2.9628	2.2756	2.2772	2.7124
3.21069	0.765482	2.83138	0.561422		194	3.272	3.5391	3.1976	3.9121	3.5923	2.4792	2.713	1.4264	2.4256	2.5628	4.0306	3.6623	3.9379	3.2	2.57	2.1658	4.3498	3.2849	3.7352	4.1571		194	3.2042	3.0516	2.8378	3.578	2.4217	1.9656	2.5957	3.9243	1.9565	2.6791	3.524	3.1255	3.5492	2.8001	2.6712	2.0351	2.8756	2.4015	2.3081	3.1228
3.21873	0.844533	2.79762	0.630103		195	3.2639	3.3888	3.2204	3.8701	3.2552	2.4422	2.8691	1.3432	2.3868	3.104	4.3845	3.747	3.7696	3.1686	2.3199	1.9984	4.9115	3.2412	3.4882	4.2021		195	2.9409	2.8633	2.7351	3.1215	2.0933	2.1673	2.6635	4.0259	2.0372	2.6438	3.6148	3.4828	3.9066	2.5295	2.5392	1.5915	3.0559	2.4053	2.4473	3.0877
3.18955	0.844867	2.70907	0.717653		196	3.2424	4.0606	2.808	3.5497	3.5277	2.4599	2.8641	1.2839	2.6395	3.035	3.5961	3.4213	3.5794	3.1485	2.4411	2.0062	4.8958	3.2512	3.189	4.7916		196	2.8543	3.2005	2.353	3.3655	2.3138	1.9015	2.5097	4.1469	1.8418	2.3751	3.0097	3.5155	4.0733	2.4812	2.0569	1.6029	3.2737	2.0404	2.4029	2.8628
3.29051	0.819641	2.76328	0.657774		197	2.9826	3.8668	3.1738	3.9681	3.7503	2.4742	3.077	1.2826	2.6928	3.139	4.1714	3.7466	3.4468	3.3203	2.5687	2.0277	4.2808	3.3872	3.6517	4.8018		197	2.8572	2.9996	2.7569	3.7384	2.2439	1.7732	2.9549	3.9563	1.7546	2.1475	3.0454	3.5682	3.6691	2.9102	2.3549	2.0663	3.282	2.1415	2.2937	2.7518
3.3087	0.794	2.79686	0.704744		198	3.134	3.7868	3.2663	4.2935	3.5408	2.626	3.1407	1.3028	2.8543	2.9502	4.288	3.4346	3.7827	3.1395	2.4954	2.0694	4.3194	3.6041	3.8092	4.3363		198	3.2683	3.0455	2.6446	3.9232	2.0621	2.1142	2.7216	3.8354	1.5709	2.2245	3.3601	4.0476	3.4262	2.9779	2.7493	1.9099	2.7998	2.0389	2.2962	2.9211
3.3687	0.864661	2.79297	0.582369		199	3.1014	3.9411	3.3386	4.4646	3.6429	2.7892	2.9754	1.3154	2.8893	2.8732	4.1045	3.6802	4.1007	3.05	2.5051	1.9788	4.6819	3.6592	3.6992	4.5834		199	3.6065	3.1531	2.7313	3.3795	2.4625	2.0472	2.428	3.3401	1.702	2.6795	3.5244	3.8278	3.0107	3.1131	2.6176	1.958	2.9236	2.1473	2.5194	2.6878
3.36505	0.81465	2.79198	0.593439		200	3.1553	3.8928	3.3203	4.2347	3.6414	2.9996	2.9722	1.3365	2.8102	2.9581	3.6334	3.7434	3.7839	3.1844	2.567	2.1234	4.638	3.6727	3.844	4.7897		200	3.36	3.1722	3.0918	3.3092	2.4187	2.1471	2.7923	3.9095	1.9081	2.1575	3.5778	3.6737	3.0605	2.8568	2.6421	2.0475	2.6121	1.9583	2.6307	2.5138
3.27553	0.673818	2.82924	0.556857		201	3.33	3.346	3.2875	4.0367	3.5232	3.1152	2.9747	1.308	2.8899	3.1351	3.7538	3.6864	3.6549	3.3052	2.9212	2.1033	4.4861	3.349	3.7647	3.5397		201	3.0192	3.1136	2.9652	3.6349	2.4964	2.1082	2.7912	4.014	2.1695	2.1247	3.2738	3.7791	2.9468	2.8401	2.9633	2.0592	2.8562	2.3113	2.5637	2.5544
3.3108	0.783193	2.89694	0.625208		202	3.3459	3.4786	3.2826	3.9524	3.6129	2.8214	3.1759	1.3147	2.8786	2.8715	4.433	3.7742	3.4537	3.1919	2.5032	2.1392	4.612	3.2978	3.7111	4.3655		202	2.6802	3.1849	2.8796	3.8579	2.5531	2.2358	2.7211	4.4581	2.0056	2.484	3.4337	3.7296	3.2059	3.151	2.8604	2.0785	3.0157	2.4091	2.4816	2.5129
3.28953	0.737542	2.88922	0.667578		203	3.2949	3.9376	3.4797	3.8862	3.371	2.9646	3.3473	1.3109	2.9613	2.9673	4.0285	3.7252	3.4336	3.1184	2.4933	2.0863	4.4932	3.2082	3.4241	4.259		203	3.0598	3.605	2.7998	3.5921	2.6035	2.1533	2.3832	4.2648	1.9608	2.7104	3.868	3.5181	3.5252	2.8023	2.771	2.0735	3.2595	2.2134	2.1528	2.4678
3.31817	0.79625	2.80857	0.589767		204	3.2958	3.7132	3.3179	4.1828	3.5958	2.7825	3.2557	1.3423	2.863	3.1033	4.4467	3.7729	3.5689	3.1828	2.2915	2.1964	4.8964	3.2679	3.7805	3.5072		204	3.0955	3.3646	2.4014	3.0161	2.6026	2.2245	2.2442	3.8179	2.0055	2.4101	3.6484	3.5727	3.4377	2.6006	3.1468	1.9688	3.3225	2.2994	2.1665	2.8257
3.3372	0.732056	2.80752	0.550934		205	2.9404	3.6655	3.348	4.2098	3.7327	2.811	3.076	1.3632	3.0854	3.2405	4.3907	3.8166	3.5414	3.3137	2.6558	2.1154	4.2723	3.5961	3.8264	3.743		205	2.8119	3.1467	2.3541	3.1734	2.7525	2.1619	1.8757	3.6828	2.054	3.0148	3.5911	3.38	3.4078	2.804	3.1188	1.8812	2.9215	2.7362	2.2429	3.039
3.31953	0.749904	2.91045	0.593193		206	2.9433	3.6731	3.2447	3.9261	3.7166	2.7773	3.1424	1.3849	3.2098	3.5925	4.0275	4.1642	3.3448	3.2672	2.4803	1.9041	4.3296	3.6757	3.4688	4.1177		206	2.9052	2.8159	2.4542	3.5622	2.6755	2.2248	2.3463	3.8528	1.9533	3.0641	3.438	3.9032	3.8062	3.1234	3.0714	1.9803	2.865	2.6885	2.3789	3.0999
3.29988	0.718096	2.83849	0.527896		207	3.4328	3.7345	3.1116	3.9954	3.4182	2.936	3.7073	1.3288	3.2035	3.0531	3.7098	3.7239	3.6657	3.3216	2.3566	2.0447	4.5691	3.6671	3.4004	3.6174		207	3.4709	2.8505	2.5778	3.5075	2.6072	2.1305	2.7504	3.8073	2.0877	2.6108	3.0972	3.3865	3.3974	3.2913	2.9736	1.8078	2.8293	2.6075	2.4919	2.4867
3.29768	0.750494	2.85475	0.559706		208	3.3422	3.7552	3.4058	3.9874	3.5228	2.7726	2.8335	1.237	3.1163	3.1348	4.2876	3.4033	3.5681	3.3647	2.4098	2.2849	4.6625	3.8247	3.6485	3.3918		208	3.555	2.7715	2.6385	4.0835	2.7657	2.0897	2.6346	3.5879	2.0204	2.4574	2.9114	3.4122	3.3239	3.1747	2.6654	1.7835	2.8944	2.8972	2.7474	2.6807
3.41879	0.85517	2.87279	0.600519		209	3.8012	3.7483	3.3024	4.5197	3.3842	2.8861	2.9312	1.2647	3.3221	2.8629	4.9327	3.3472	3.732	3.4798	2.5356	2.1893	4.4203	3.887	3.4001	4.4289		209	3.4878	3.0703	2.3168	3.994	2.656	2.075	3.0399	3.4207	1.9015	2.1235	3.7604	3.4265	3.1793	3.0651	2.8513	1.9621	2.9794	2.4319	2.6445	3.0699
3.39306	0.762803	2.78297	0.487138		210	3.3657	3.8097	3.3961	4.1204	3.765	3.0176	3.0834	1.1928	3.0994	2.9944	4.2551	3.4547	3.6154	3.5208	2.8991	2.1554	4.3332	3.9776	3.3748	4.4305		210	2.848	3.1828	2.4128	3.8154	2.5336	2.1924	2.4821	3.0251	2.1211	2.588	3.7297	3.2797	3.178	2.9889	2.7058	2.0234	2.5108	2.6313	2.5155	2.8949
3.49716	0.812854	2.84617	0.521152		211	3.422	3.7381	3.5623	4.536	3.7724	2.9676	3.34	1.2477	3.1016	2.6462	4.5186	3.8417	3.9167	3.6369	3.1211	2.2683	4.6381	4.2219	3.4517	3.9942		211	2.9838	3.0857	2.9969	3.9339	2.5048	2.023	2.4602	3.2486	1.9938	2.4795	3.4093	3.4606	3.4586	3.0796	2.7332	2.0763	2.5636	2.9342	2.554	2.9438
3.44638	0.765195	2.83842	0.539319		212	3.189	3.7802	3.6806	4.659	3.4885	2.8586	3.2184	1.3551	3.0906	3.108	4.1397	4.4656	3.7154	3.6718	2.8843	2.2674	4.0824	4.1943	3.3414	3.7373		212	2.8301	2.8593	2.7729	3.692	2.3657	2.0174	2.5433	3.6337	1.9659	3.2299	2.9613	3.6549	3.2402	3.0105	2.6075	1.7915	2.7284	3.0091	2.6256	3.2292
3.38887	0.764512	2.94258	0.607325		213	3.0348	3.4489	3.3905	4.2717	3.3668	2.9814	3.16	1.2917	2.9312	3.2018	4.5538	4.034	3.9204	3.389	2.7939	2.1736	4.1069	4.1798	3.6977	3.8494		213	3.2398	3.2034	2.722	3.8553	2.6233	2.2127	2.6375	3.9826	2.1386	2.841	3.5888	4.0195	3.3024	2.8143	2.6271	1.8189	3.0317	2.7382	2.3558	3.0987
3.34458	0.804526	2.89657	0.701558		214	3.1125	3.737	3.6118	4.1982	2.9718	2.75	2.9456	1.1825	3.0227	3.0881	4.8159	3.9222	4.0303	3.3908	2.7343	2.1696	3.9209	3.7426	3.4452	4.0995		214	3.2238	2.6869	3.0765	3.8776	2.3396	1.9397	2.5094	4.2372	1.9302	2.8741	3.6622	3.8783	3.7986	2.9683	2.5028	1.8207	2.8554	2.6377	2.3148	2.7977
3.36507	0.752736	2.78548	0.57278		215	3.4386	3.9167	3.7351	4.2783	3.1394	2.8183	2.9587	1.2471	3.3926	3.1087	4.4165	3.6069	3.9814	3.6603	2.8012	2.1829	3.8236	4.2713	3.1659	3.3579		215	3.1229	3.1181	3.1132	3.7946	2.0258	1.9599	2.302	3.6402	2.0075	2.6213	3.0318	3.4089	3.2639	3.0737	2.7223	1.9717	2.8352	3.0876	2.156	2.453
3.39963	0.755096	2.85523	0.533941		216	3.6723	3.8637	3.7358	3.8877	3.2343	2.7578	3.1275	1.3206	3.3461	3.0912	4.4987	3.5664	3.9136	3.4614	2.7576	2.1539	4.3205	4.2281	3.1933	3.8621		216	3.3122	3.1414	2.6954	3.4681	2.3732	2.1418	2.5792	3.9049	2.0417	2.9243	3.2196	3.2466	3.2445	3.1592	2.9214	1.8361	2.9528	3.005	2.1257	2.8114
3.49364	0.778649	2.92671	0.598049		217	3.5613	3.9687	3.4618	4.5236	3.4558	2.8504	3.3013	1.3386	3.6904	2.9816	4.6762	3.5985	4.2729	3.5286	2.9643	2.2081	4.3042	3.8641	3.5406	3.7818		217	3.6689	3.313	2.8176	3.6451	2.5269	2.1797	2.9559	4.1012	1.9515	2.7447	3.2834	3.3016	3.3795	3.3119	2.7516	1.7876	2.5951	2.9867	2.2775	2.9548
3.5184	0.83164	2.96977	0.643577		218	3.5654	4.3253	3.6085	4.6284	3.3828	2.8495	3.4206	1.337	3.838	2.7681	4.4794	3.6018	3.8508	3.4233	2.7352	2.1834	4.7277	4.0086	3.7132	3.921		218	3.7897	3.8587	2.9807	3.8634	2.7063	2.2396	2.7602	3.9528	1.8573	2.7243	3.2999	3.3396	2.9885	3.4485	2.7016	1.7961	2.5262	2.9802	2.2848	3.2969
3.47331	0.780417	3.01045	0.621613		219	3.3207	4.6832	3.7138	3.9354	3.3247	2.9735	3.0961	1.4291	3.3957	2.9959	4.5348	3.8487	3.6646	3.4038	2.7814	2.1742	4.3894	4.0752	3.917	3.809		219	3.0812	3.5344	3.0398	3.9026	2.6214	2.2527	2.5375	3.739	2.1242	3.084	3.3021	3.9676	2.9742	3.6821	2.7165	1.7362	2.9268	2.9541	2.3758	3.6568
3.44042	0.724996	3.02195	0.707649		220	3.7322	4.3297	3.9014	3.8969	3.3926	2.981	2.8539	1.4336	3.3858	2.7703	3.908	4.0101	4.1105	3.3719	3.0493	2.2077	4.2542	3.9251	3.6718	3.6223		220	3.4179	3.3059	3.1098	4.3309	2.6323	2.319	2.0294	3.9318	2.1286	2.6128	3.1586	4.0387	3.34	3.4944	2.959	1.6146	2.9072	3.2355	2.346	3.5265
3.55491	0.836798	3.00331	0.746509		221	3.4964	4.3678	3.9812	4.6514	3.2273	3.0262	3.1731	1.3758	3.3792	3.3521	4.8843	4.3915	4.2274	3.3012	2.7856	2.2137	4.1894	3.9059	3.6069	3.5618		221	3.2496	3.2331	3.0086	4.5378	2.1737	2.3936	2.3528	4.3827	2.1281	2.4424	3.1343	4.0634	3.3195	3.1776	3.0604	1.6282	2.8409	3.2653	2.4261	3.2481
3.61406	0.847961	2.93237	0.637629		222	4.1001	3.9983	3.7386	4.6986	3.1842	3.0353	3.4473	1.3131	3.5894	3.5437	4.9162	4.5391	4.2727	3.3222	3.0569	2.1652	4.0044	4.36	3.6052	3.3908		222	3.2223	3.4253	2.9541	3.9698	2.2109	2.199	2.3988	3.7659	2.0998	2.5746	3.5796	3.8666	3.3007	3.054	3.2534	1.6709	2.6383	3.1473	2.5125	2.8035
3.56703	0.80418	2.87631	0.675315		223	4.0705	3.8186	3.9743	4.0526	3.417	3.0149	3.5206	1.3593	3.4221	3.3667	4.5678	4.5152	4.0478	3.4414	3.0439	1.9916	4.4321	4.3516	3.5582	3.3743		223	3.3869	3.2438	3.3779	3.8698	2.1232	2.2546	2.2427	3.6337	2.165	2.1749	3.6836	3.655	3.3287	3.1189	3.382	1.4987	2.5588	2.8581	2.3818	2.5881
3.50149	0.859777	2.93734	0.721928		224	3.5738	3.753	3.9798	4.3573	3.2479	2.8827	3.3511	1.0764	3.6396	3.0388	4.8303	4.0754	3.6557	3.492	2.7347	2.0745	4.5843	4.0714	3.7506	3.8604		224	3.8359	3.2191	3.26	4.2326	2.0389	2.2717	2.7509	3.8869	2.0571	2.1169	3.7636	3.4461	3.2569	3.1308	3.237	1.583	2.7432	3.004	2.2454	2.6669
3.6393	0.570444	2.95437	0.651053		225	3.7595	4.1465	3.9757	4.1298	3.0768	2.94	3.2349	3.534	3.5304	3.3127	4.4624	4.0195	3.8128	3.7719	2.715	2.2028	4.0678	3.8988	4.1133	4.0814		225	3.816	3.4005	3.0472	3.7897	2.0101	2.242	2.805	3.7196	2.3552	2.139	2.9658	3.9052	3.6233	3.324	3.2316	1.7129	2.6815	2.7642	2.5592	2.9953
3.74688	0.619584	2.91488	0.655931		226	3.8919	4.6774	4.2313	4.1195	3.1431	2.9001	2.9963	3.7398	3.6565	3.3832	4.1948	4.2873	4.3207	3.808	2.9618	2.2576	4.1215	3.9153	3.9809	4.3506		226	3.5302	3.3463	2.8888	3.9131	1.9194	2.2781	2.5043	3.7888	2.2551	2.4297	3.0338	3.8914	3.5907	3.4016	2.8934	1.6114	2.5677	2.633	2.7485	3.0722
3.72125	0.701508	2.97797	0.694355		227	3.7814	4.4754	4.2248	4.4271	3.0292	2.8053	2.8739	3.5977	3.6269	3.1634	4.4937	4.1814	4.2703	3.5443	3.1153	2.1218	4.2827	3.7671	3.7972	4.846		227	3.6187	3.3366	3.2277	4.3296	2.0861	2.1502	2.6216	3.8843	2.0887	2.5706	3.8208	3.4348	3.3417	3.1154	3.036	1.5204	2.7423	2.9302	2.6809	3.0228
3.70834	0.688195	2.98526	0.682906		228	3.7239	4.4075	3.8675	4.4036	3.0675	2.8581	3.1574	3.4959	3.5883	3.0911	4.6836	4.0835	4.0901	3.5548	3.0585	2.0678	4.7444	4.0918	3.6967	4.4348		228	3.6478	3.3667	3.5114	3.6367	2.2966	2.2349	2.7925	4.0373	2.0822	2.9039	3.8666	3.7308	3.1618	3.1914	3.0487	1.3734	2.8543	2.5205	2.4127	3.0351
3.73043	0.695723	2.89154	0.667553		229	3.7973	4.2666	4.1777	4.4985	3.1323	2.8371	3.2431	3.4162	3.605	2.8008	4.8284	4.1806	4.1582	3.3704	3.3528	2.1503	4.2903	4.4726	3.5933	4.4371		229	3.5457	3.3128	3.3151	3.5787	2.0966	2.2476	2.6667	4.2744	1.7786	2.7386	3.1093	3.4888	2.8746	3.4438	2.8733	1.5294	2.6191	2.7668	2.4242	3.1467
3.80108	0.725949	2.95671	0.717247		230	3.9396	4.3729	4.1933	4.4545	3.1634	3.0041	3.1672	3.4627	3.8203	3.0709	4.9663	4.3539	4.0282	3.5181	3.3025	1.9585	4.4804	4.3375	3.7309	4.6964		230	3.5156	3.0436	3.6309	3.4968	2.2779	2.0936	2.6719	3.7068	1.9174	2.3591	3.6285	4.2709	3.0068	3.5951	3.0618	1.4914	2.609	2.9575	2.3766	3.423
3.7498	0.695249	2.87447	0.660408		231	3.707	4.4764	3.8697	4.7659	3.1665	3.0274	3.1169	3.9396	4.1977	2.8219	4.5665	4.2861	3.9036	3.5539	3.0554	2.0442	4.3818	4.0335	3.733	4.349		231	3.8798	3.3783	3.1725	3.0916	1.9884	2.1466	2.5926	3.3826	2.1125	2.2935	3.3258	4.02	3.4224	3.3635	3.2823	1.5513	2.4817	2.824	2.4797	2.7002
3.78879	0.693713	2.99456	0.712891		232	3.988	4.3447	3.7438	4.4332	2.8765	3.2288	3.7324	4.4744	3.6515	2.803	4.7642	4.1604	4.1476	3.6261	3.0706	1.9829	4.0436	4.1753	4.0653	4.4635		232	3.355	3.5223	2.9755	3.6802	1.9117	2.5187	2.8052	3.9605	2.0041	2.4002	3.8171	4.034	3.098	3.8158	3.5649	1.5987	2.5607	2.7395	2.7671	2.762
3.71407	0.674793	2.96643	0.649048		233	3.6804	4.0866	4.0497	4.2676	3.0465	2.8559	3.6829	3.8553	3.6531	2.6267	4.5033	4.55	4.3447	3.7046	3.0349	2.0635	3.9851	4.0171	3.7654	4.5081		233	3.304	3.2501	3.2874	3.5946	2.1382	2.1897	2.5166	3.8636	2.0726	2.6108	3.9031	4.021	3.1482	3.4465	3.0772	1.6978	2.8187	2.6816	2.645	3.0618
3.72254	0.712025	3.02732	0.673409		234	4.0848	4.705	3.8831	4.1129	3.2308	3.0659	3.1162	4.125	3.413	2.8454	4.6373	4.4327	4.1192	3.7736	2.6872	2.0668	3.7994	4.1045	3.6232	4.6248		234	3.8431	3.2885	3.034	3.6849	2.0983	2.2816	2.4662	3.7587	2.2282	2.7509	3.8121	4.0123	3.4087	3.4257	3.3467	1.5839	3.0441	3.0518	2.4033	3.0234
3.79884	0.717682	2.932	0.584186		235	3.8763	4.6743	4.3461	4.1972	3.2509	2.7812	3.322	4.0324	3.4261	3.0593	4.9263	4.3084	4.5209	3.577	2.9111	2.2282	4.2685	4.1539	3.6032	4.5135		235	3.3809	3.165	3.2948	3.1168	2.0733	2.0559	2.4294	3.5252	2.2061	2.7695	3.8007	3.823	3.3135	3.424	3.1712	1.7973	2.9661	2.9407	2.7372	2.6495
3.80372	0.676248	2.85178	0.510027		236	3.703	4.6726	4.4661	4.0969	3.3089	2.4959	3.7665	3.9455	3.7774	3.2352	5.0694	4.1236	4.2897	3.6093	3.255	2.3189	4.17	3.84	3.5033	4.4272		236	2.9487	3.3187	2.8292	3.5363	2.2133	1.9252	2.4618	3.4271	2.2309	2.9471	3.642	3.5462	2.8662	3.1166	2.7166	1.9353	2.8787	2.8418	2.647	3.007
3.77939	0.742805	2.95266	0.58813		237	3.4017	4.6595	3.9287	4.3091	3.3119	2.8354	3.2279	3.8441	3.5166	3.0522	5.3759	4.2787	4.382	3.7334	3.0457	2.163	4.6207	3.8726	3.784	4.2447		237	3.0714	3.1561	2.7693	4.1819	2.0477	2.3606	2.4497	3.6113	2.4813	3.0348	3.5539	3.862	2.8967	3.0907	2.8371	1.7812	3.0931	3.0121	2.5227	3.2396
3.78743	0.717679	3.05626	0.719537		238	3.6702	5.0352	3.7255	4.3633	3.1968	2.8743	3.0291	3.9641	3.9365	3.1224	4.9996	4.6983	4.3709	3.9109	3.0516	2.2807	3.9896	3.8494	3.6056	4.0746		238	3.5221	3.2724	2.8902	4.1519	2.1209	2.3533	2.325	3.9067	2.1236	2.7783	3.9419	3.8462	3.4096	3.5081	3.332	1.4967	3.0315	3.3207	2.4475	3.3466
3.76412	0.761812	3.06833	0.689712		239	3.5799	4.8835	4.3259	3.9586	3.225	2.96	3.0894	3.6948	3.6439	3.0604	4.9047	5.1543	4.2729	3.838	2.6857	2.2149	4.3947	3.7784	3.7172	3.9001		239	3.6323	3.474	3.2793	3.6444	2.2775	2.5412	2.444	3.9277	2.0827	2.5859	4.0141	4.0534	3.1048	3.5705	3.5405	1.5724	3.0104	2.7284	2.6149	3.2682
3.77996	0.740502	3.09484	0.745437		240	4.0914	4.5142	4.4869	3.9364	3.2375	2.7614	3.1475	3.495	3.8473	3.0916	4.7328	5.0557	4.0184	3.6515	2.8229	2.2122	4.1292	4.5961	3.5908	4.1805		240	3.9701	3.6131	3.2813	3.5685	2.3063	2.792	2.4461	4.5446	2.1451	2.4341	3.8858	4.2174	3.2952	3.26	3.2929	1.5819	2.9359	2.7917	2.5721	2.9626
3.84012	0.701676	2.96565	0.749307		241	3.9702	4.6029	4.2907	4.3542	3.1083	2.9758	3.4251	4.0739	3.5692	3.3731	5.2151	4.6894	4.3538	3.7126	3.0813	2.2627	4.0803	4.1402	3.3308	4.1928		241	3.7741	3.3148	3.0231	3.6249	2.0831	2.5235	2.4815	4.5575	2.1134	2.3535	3.5942	4.3122	3.0155	3.2616	3.0055	1.6013	2.8104	2.6853	2.4121	2.7656
3.83822	0.743991	3.19017	0.81868		242	3.6965	4.8884	4.0121	4.5178	3.1741	2.9696	3.4259	4.0359	3.7641	3.2126	5.2544	4.6863	3.9578	3.8208	3.1263	2.0942	4.3145	4.2118	3.3299	4.2715		242	3.919	3.7935	3.1906	4.1282	2.4784	2.8089	2.4468	4.8584	2.186	2.7831	3.7226	4.622	3.0837	3.5548	3.6472	1.7303	2.5577	2.6662	2.7112	2.9149
3.85123	0.675235	3.15189	0.816199		243	3.7442	4.5039	4.0175	4.5128	3.0633	3.1198	3.5625	3.8098	3.7005	3.3801	5.1123	4.6998	3.8697	4.0056	3.2297	2.3439	4.5104	3.9594	3.2994	4.5799		243	4.2034	3.6481	3.1647	3.9028	2.12	2.727	2.4292	4.4453	2.1577	2.4987	4.1147	4.5014	3.0807	3.6351	3.4322	1.7421	2.4184	2.8978	2.6797	3.2388
3.7721	0.722883	3.05735	0.762491		244	3.4231	4.7638	3.7055	4.2887	2.7747	2.872	3.5851	3.5485	3.656	3.5398	5.1354	4.8154	4.098	3.7921	2.8962	2.3358	4.4293	3.7867	3.7008	4.2952		244	4.3284	3.4787	3.1211	3.3347	1.9409	2.6885	2.7876	4.1674	2.1944	2.3006	3.8141	4.2357	3.4321	3.5456	3.0957	1.5516	2.4634	3.1119	2.6254	2.9292
3.83008	0.738336	3.02703	0.703477		245	3.6816	5.059	3.831	4.3681	2.9564	2.9647	3.3574	3.3849	3.8116	3.602	5.1338	4.9179	4.4668	3.7626	3.2903	2.3062	4.4742	3.9651	3.376	3.892		245	3.6573	3.531	3.0106	3.3776	1.8955	2.7436	3.1394	4.279	1.953	2.4999	3.6605	4.1175	3.1053	3.2927	3.4223	1.651	2.5533	3.1432	2.478	3.0299
3.86123	0.684891	3.11278	0.619727		246	3.7619	4.4335	3.8737	4.4656	3.2934	3.1259	3.1954	3.4232	4.1401	3.5801	5.3689	4.5013	4.6448	3.6677	3.3419	2.2538	4.0936	4.1683	3.6262	4.2653		246	3.1374	3.3975	3.3256	3.6398	2.2767	2.5875	3.3291	4.4753	2.3954	2.5712	3.2617	4.104	2.9001	3.6572	3.7023	2.0192	2.866	2.977	2.6411	2.9915
3.95427	0.747683	3.06624	0.755904		247	3.8094	4.8353	4.0934	4.8658	3.0113	3.0987	3.4443	3.3806	4.3932	3.0721	5.4233	4.7579	4.4274	3.9395	3.2583	2.6141	4.1066	4.0256	3.901	4.6276		247	2.9543	3.389	3.9192	4.1209	2.2551	2.6816	2.9513	4.5385	2.4621	2.1691	3.4395	4.4635	2.8782	3.578	3.0272	1.7453	2.5537	2.7579	2.7939	2.6466
3.87897	0.767506	3.00178	0.741484		248	3.6287	4.8043	4.0715	4.5181	2.8122	2.8293	3.5973	3.6076	3.8899	3.1163	5.12	5.171	4.3742	3.6939	3.2694	2.3667	4.3019	4.4217	3.6715	4.314		248	3.4224	3.3668	3.3279	4.1794	1.9333	2.206	2.5884	4.1042	2.5492	2.2183	3.8566	4.1922	2.9106	3.4598	3.141	1.7358	2.2543	2.774	2.7548	3.0607
4.02558	0.90233	3.04865	0.679159		249	3.8451	5.5925	4.4634	4.5476	2.7318	2.8044	3.6896	3.5107	3.8615	3.3037	6.0239	4.8862	4.5764	3.9774	3.3851	2.509	4.1638	4.1903	3.6996	4.7496		249	3.8742	3.5585	3.2366	3.9656	1.8222	2.2016	2.8087	4.2437	2.6855	2.5883	3.4655	3.7456	3.3429	3.2978	3.0149	1.737	2.5981	2.7982	2.7776	3.2104
4.03807	0.804013	3.05072	0.668495		250	4.0667	5.4831	4.6065	4.5288	2.9894	3.2421	3.7715	3.6195	3.8734	3.2971	5.3828	4.8635	4.209	3.9462	3.3888	2.4801	4.0472	3.8123	3.8466	5.3069		250	3.9911	3.1871	3.2886	3.767	1.8877	2.329	2.7874	4.2416	2.3544	2.7452	3.4185	3.6814	3.2444	3.3813	3.077	1.669	2.6609	3.0797	2.7058	3.5172
3.90346	0.767486	3.03081	0.659172		251	4.5626	4.6587	4.1972	4.6739	3.0688	3.1655	3.9507	3.2513	3.8449	3.3532	5.3713	4.5375	4.351	3.8198	2.9402	2.1209	3.985	3.7594	3.7684	4.689		251	3.8675	3.0931	3.3992	3.3934	1.8933	2.3092	2.8127	4.2358	2.4662	2.7293	3.8257	3.1755	3.1953	3.3424	3.1292	1.6228	2.9027	3.3495	2.3641	3.5094
3.86652	0.73072	3.05273	0.732872		252	4.3224	4.6162	3.6889	4.7862	3.0657	3.1006	4.0432	3.3225	3.8224	3.2645	5.485	4.3797	4.0515	3.8529	3.0885	2.2015	4.2849	4.0885	3.7738	4.0915		252	3.5777	3.7526	3.4245	3.6128	1.9796	2.5166	2.6258	4.4835	2.2301	2.2563	3.6716	3.8425	3.4615	3.3167	3.0945	1.5849	2.657	3.1886	2.4532	3.3246
3.91229	0.765751	3.11532	0.838034		253	4.0682	4.8496	3.7965	4.8272	2.6463	3.0169	3.9363	3.4399	3.8598	3.4708	5.4862	4.6822	4.1949	3.9209	3.331	2.2682	4.4008	4.0548	3.7767	4.2185		253	3.8229	3.8073	3.2823	3.8095	1.7848	2.3442	2.9043	4.3773	2.1954	2.5183	3.3788	4.9076	3.6671	3.3588	3.2406	1.6886	2.4417	2.9936	2.4532	3.33
3.87258	0.772802	3.013	0.863399		254	3.3015	4.8526	4.1799	4.5621	2.544	3.4426	3.6681	3.5645	4.5356	3.0371	5.0375	4.6973	4.2613	3.624	3.2132	2.1699	4.2475	4.3816	3.743	4.3883		254	3.3916	3.6185	2.8513	4.2235	1.6459	2.2339	2.9095	4.6892	1.8958	2.8225	3.0558	4.6531	3.1567	3.0272	3.2582	1.5486	2.4285	2.7788	2.6704	3.4009
