# Supplementary material for: Hypoxia controls plasma membrane targeting of polarity proteins by dynamic turnover of PI4P and PI(4,5)P2
Source: eLife. 2022 Jun 9;11:e79582. doi: 10.7554/eLife.79582 (PMC9242647; doi:10.7554/eLife.79582)
Supplement: Figure 2—source data 1. [file elife-79582-fig2-data1.xlsx]

## Sheet: Figure 4A-P4M
Figure 2 Souce Data 1
						1	2	3	4	5	6	7	8	9	10	11	12	13	14	15	16	17	18	19	20	21	22	23	24			1	2	3	4	5	6	7	8	9	10	11	12	13	14	15	16	17	18
WT		RNAi			WT																										RNAi
AVG	STDEV	AVG	STDEV
t_C3_PM/Cy	t_C3_PM/Cy	t_C3_PM/Cy	t_C3_PM/Cy		min	t_C3_PM/Cy	t_C3_PM/Cy	t_C3_PM/Cy	t_C3_PM/Cy	t_C3_PM/Cy	t_C3_PM/Cy	t_C3_PM/Cy	t_C3_PM/Cy	t_C3_PM/Cy	t_C3_PM/Cy	t_C3_PM/Cy	t_C3_PM/Cy	t_C3_PM/Cy	t_C3_PM/Cy	t_C3_PM/Cy	t_C3_PM/Cy	t_C3_PM/Cy	t_C3_PM/Cy	t_C3_PM/Cy	t_C3_PM/Cy	t_C3_PM/Cy	t_C3_PM/Cy	t_C3_PM/Cy	t_C3_PM/Cy		min	t_C3_PM/Cy	t_C3_PM/Cy	t_C3_PM/Cy	t_C3_PM/Cy	t_C3_PM/Cy	t_C3_PM/Cy	t_C3_PM/Cy	t_C3_PM/Cy	t_C3_PM/Cy	t_C3_PM/Cy	t_C3_PM/Cy	t_C3_PM/Cy	t_C3_PM/Cy	t_C3_PM/Cy	t_C3_PM/Cy	t_C3_PM/Cy	t_C3_PM/Cy	t_C3_PM/Cy
1.01407	0.0604385	1.00703	0.0403881		1	1.007	1.0354	1.04	0.9073	1.0398	1.0329	1.1807	1.0732	1.0548	1.0047	0.992	0.9129	1.0838	1	0.9964	0.9195	0.977	1.0587	1.0232	1.0232	0.9689	1.0202	1.0472	0.9388		1	0.9546	1.0285	1.0089	1.0008	0.9294	1.0175	1.0537	1.0074	0.99	1.0614	0.9973	1.0439	1.0494	1.0435	0.9718	1.0663	1.0219	0.9707
1.01511	0.0488406	1.00555	0.0545919		2	1.0209	1.0825	0.9535	1.0752	1.0339	0.9333	1.0253	0.9828	1.0366	0.9605	1.0362	1.0667	1.0782	1.0201	0.9985	1.0052	1.1019	1.0567	0.9959	0.9959	0.908	0.9829	1.0292	0.9827		2	0.9931	0.9971	1.0751	0.9471	0.9875	1.0163	0.9622	1.0047	1.0038	0.9801	0.9186	1.038	1.0273	1.0493	1.1229	0.9664	0.9731	0.8698
0.970825	0.0772533	0.987422	0.0661799		3	0.972	0.8821	1.0065	1.0175	0.9263	1.0339	0.794	0.944	0.9087	1.0348	0.9719	1.0204	0.838	0.9799	1.0052	1.0752	0.921	0.8846	0.9809	0.9809	1.123	0.9969	0.9236	1.0785		3	1.0523	0.9743	0.916	1.0521	1.0831	0.9663	0.9841	0.988	1.0063	0.9585	1.0841	0.918	0.9233	0.9072	0.9052	0.9673	1.0051	1.1595
0.954958	0.143009	0.979126	0.0673565		4	0.921	0.9044	0.9382	0.9643	0.9079	1.3916	0.7903	0.8985	0.8514	1.0206	0.9235	1.0088	0.7421	1.0348	1.1116	0.9733	0.8944	0.8833	0.8016	0.8016	1.1142	0.9734	0.8704	1.1978		4	1.0402	1.0981	0.9239	0.9753	1.1242	0.9731	0.9376	1.0344	0.9837	0.9962	1.0572	1.0374	0.8915	0.9681	0.9341	0.9457	0.8979	1.0166
0.931404	0.103001	0.98687	0.0816115		5	0.8556	0.909	1.0399	0.9885	0.9048	1.1903	0.7433	0.9108	0.8492	1.115	0.9366	1.0274	0.8638	0.9716	1.0246	0.9357	0.9359	0.9038	0.7912	0.7912	0.9626	0.9237	0.819	0.9602		5	1.0797	1.025	0.91	0.8789	1.0507	0.9307	0.9718	1.0213	0.9448	0.9158	1.2315	1.0123	0.9459	0.9025	0.9201	0.9831	0.9505	1.0863
0.901183	0.0787025	1.03252	0.090301		6	0.9144	0.9243	1.0156	0.8372	0.9573	0.9143	0.7731	0.8843	0.9331	1.1099	0.8257	0.9282	0.7977	0.8892	1.0166	0.8682	0.8773	0.9105	0.8627	0.8627	0.899	0.9426	0.7528	0.9317		6	1.199	0.975	0.9429	0.9262	1.1697	0.9291	1.0113	1.0634	0.9668	1.011	1.2239	1.0812	1.0465	0.9216	0.9524	1.138	0.9386	1.0546
0.9167	0.0796774	1.0492	0.109071		7	0.9227	1.017	1.0209	0.9047	0.9115	1.0123	0.7361	0.8761	0.9616	1.0249	0.8719	1.0282	0.8573	0.8586	0.9472	0.8416	0.8771	0.9231	0.891	0.891	0.8707	1.0325	0.774	0.9488		7	1.3123	1.0816	0.9332	0.9649	1.172	0.9603	1.0179	1.1088	1.0465	0.9916	1.2584	1.0317	1.0089	0.9412	0.915	1.1253	0.9623	1.0011
0.916762	0.0826671	1.02337	0.0865742		8	0.954	0.9074	1.0393	0.8375	0.9225	0.9721	0.7265	0.8812	0.9466	1.0242	0.9121	1.0026	0.9973	0.8173	0.965	0.8077	0.8744	0.9972	0.9113	0.9113	0.9273	0.994	0.7467	0.9268		8	1.1976	1.0193	1.0262	0.9461	1.1392	1.0442	0.9624	1.0825	1.0007	0.9449	1.2511	1.0013	1.0058	1.0572	0.9792	0.9287	0.8737	0.9506
0.951254	0.0901972	1.03961	0.091593		9	1.0212	0.944	1.1046	0.9112	0.9057	1.0886	0.7927	0.9794	0.9209	1.0563	0.9426	1.0037	0.9926	0.9026	0.9663	0.8362	0.8682	1.0867	0.8475	0.8475	0.9331	1.0181	0.8175	1.0429		9	1.1047	0.9737	1.0066	1.036	1.1307	1.1222	1.0623	1.1338	1.0949	0.915	1.3342	1.0713	1.0624	1.0018	0.9431	1.0168	0.9703	0.9227
0.946717	0.105473	0.9933	0.0856301		10	0.9513	0.8897	1.0742	0.897	0.9167	1.1252	0.8384	0.9747	0.9227	1.1579	0.968	1.0985	0.989	0.959	0.96	0.8163	0.847	1.0394	0.7781	0.7781	1.0123	1.0072	0.8249	0.8956		10	1.0123	0.9217	1.0036	0.9335	1.0704	1.1058	0.9073	1.1576	1.0342	0.8613	1.1831	1.0598	1.017	0.9362	0.9036	0.9405	1.0136	0.9182
0.939858	0.0991106	0.955822	0.0747346		11	1.0196	0.9631	1.11	0.8691	0.8697	1.035	0.8246	0.9645	0.9077	1.1165	1.0342	1.059	1.007	0.8822	0.9132	0.829	0.8556	1.033	0.79	0.79	0.9139	1.0065	0.8166	0.9466		11	1.0005	0.9197	0.9906	0.9594	1.052	1.0399	0.9846	0.9336	1.0465	0.8634	1.1353	0.9156	0.9779	0.9468	0.8279	0.906	0.9237	0.8166
0.900388	0.0931204	0.943139	0.0695798		12	0.9527	0.9099	1.1616	0.8385	0.8428	0.9728	0.7622	0.8815	0.9219	1.0038	0.969	1.0365	0.9236	0.812	0.98	0.8155	0.8271	0.8836	0.802	0.802	0.8862	0.9201	0.7814	0.9226		12	0.9909	0.8625	0.9301	0.9442	1.0024	1.0295	0.9273	0.996	1.0064	0.8349	1.0378	0.9338	0.9307	0.9156	0.8345	0.9436	0.9185	0.8312
0.876063	0.0831926	0.932257	0.0629825		13	0.8992	0.9519	1.0205	0.8346	0.9297	0.9549	0.7763	0.9201	0.8439	0.9938	0.9353	1.0024	0.8619	0.7823	0.9453	0.7899	0.7938	0.9065	0.7515	0.7515	0.8657	0.8734	0.7544	0.8867		13	0.9278	0.835	1.0078	0.9001	0.9975	0.9487	0.9331	0.9045	0.9951	0.8795	1.0744	0.9314	0.9947	0.9744	0.8193	0.9124	0.9522	0.8468
0.853896	0.0860492	0.898222	0.0608863		14	0.8482	0.9174	1.0302	0.8201	0.8914	0.9532	0.799	0.9864	0.8373	0.9483	0.8867	0.9891	0.8551	0.7572	0.8999	0.7749	0.7731	0.8068	0.7451	0.7451	0.7691	0.894	0.7348	0.8311		14	0.9236	0.8753	0.9357	0.9289	0.9259	0.9429	0.8418	0.8749	0.9529	0.8748	1.0093	0.9509	0.8895	0.9602	0.7567	0.888	0.9494	0.7939
0.830987	0.0798675	0.875239	0.0543599		15	0.8356	0.9422	0.9614	0.7915	0.7781	0.892	0.7481	0.85	0.7882	0.8945	0.8609	1.0289	0.8085	0.7647	0.8897	0.7665	0.7477	0.8044	0.7433	0.7433	0.8234	0.8843	0.7102	0.8863		15	0.9129	0.8608	0.8893	0.8735	0.9105	0.8716	0.8554	0.8525	0.9525	0.8275	0.9911	0.8677	0.8781	0.9241	0.7661	0.8251	0.9366	0.8114
0.797446	0.0756529	0.853987	0.0541396		16	0.7625	0.8761	0.8827	0.7933	0.7247	0.9362	0.7169	0.7689	0.78	0.9448	0.8719	0.8549	0.7277	0.7649	0.8337	0.7256	0.7227	0.8088	0.7006	0.7006	0.7846	0.8681	0.7162	0.8723		16	0.8872	0.8324	0.9313	0.8475	0.8555	0.882	0.8282	0.8549	0.9209	0.8162	1.0003	0.8436	0.878	0.8279	0.7855	0.8252	0.901	0.7322
0.766804	0.0878558	0.847	0.0566771		17	0.7073	0.8729	0.8921	0.6984	0.7086	0.8989	0.7074	0.7616	0.7988	0.9532	0.8932	0.7883	0.72	0.7095	0.7309	0.7109	0.7059	0.6856	0.6627	0.6627	0.749	0.833	0.6787	0.8737		17	0.8625	0.8236	0.9178	0.8895	0.8079	0.8965	0.8716	0.8445	0.9262	0.8217	0.9107	0.8546	0.8806	0.8443	0.6894	0.8132	0.8667	0.737
0.744938	0.0819407	0.837243	0.0634123		18	0.6975	0.8903	0.8357	0.7034	0.7191	0.9125	0.6902	0.747	0.7694	0.8627	0.8584	0.7441	0.7055	0.679	0.731	0.6645	0.6709	0.6871	0.6447	0.6447	0.7054	0.8066	0.6679	0.8409		18	0.8999	0.8463	0.89	0.8668	0.7955	0.867	0.81	0.8603	0.9376	0.7981	0.9743	0.839	0.8668	0.8694	0.7011	0.8005	0.8821	0.7106
0.7258	0.0768227	0.826465	0.0542349		19	0.677	0.843	0.7873	0.7198	0.6994	0.8309	0.6655	0.7129	0.7343	0.9177	0.8452	0.7274	0.6911	0.6758	0.7052	0.6702	0.6656	0.6622	0.6405	0.6405	0.6594	0.7977	0.6543	0.7963		19	0.8656	0.8159	0.8517	0.8353	0.8168	0.8696	0.805	0.8001	0.902	0.7977	0.9372	0.839	0.8844	0.8616	0.6963	0.7778	0.8812	0.7415
0.712325	0.0773411	0.821191	0.0558196		20	0.6777	0.8609	0.7716	0.7042	0.6627	0.7948	0.6607	0.6997	0.733	0.893	0.8153	0.7365	0.7028	0.66	0.7545	0.6608	0.6343	0.648	0.6066	0.6066	0.6617	0.7665	0.6279	0.756		20	0.865	0.8179	0.8694	0.8182	0.7932	0.8543	0.8159	0.8117	0.8994	0.7991	0.9221	0.8777	0.8403	0.8554	0.6823	0.7829	0.884	0.7059
0.708833	0.0673265	0.826761	0.0615173		21	0.7076	0.8109	0.7811	0.6582	0.6676	0.8236	0.671	0.706	0.7591	0.858	0.7696	0.7137	0.6728	0.6465	0.7072	0.6407	0.66	0.6434	0.6235	0.6235	0.6962	0.7521	0.646	0.7737		21	0.8735	0.8512	0.8862	0.8019	0.7613	0.8289	0.8318	0.8344	0.8867	0.8001	0.9406	0.9186	0.8747	0.8666	0.6906	0.7685	0.876	0.7139
0.704158	0.0592061	0.818174	0.070388		22	0.6972	0.8035	0.7568	0.6777	0.6637	0.7457	0.6669	0.7039	0.7291	0.8354	0.7711	0.7379	0.6882	0.6389	0.7017	0.6294	0.6648	0.6522	0.6301	0.6301	0.6738	0.7396	0.6601	0.802		22	0.9176	0.7934	0.8673	0.8174	0.7313	0.8043	0.8343	0.8785	0.8966	0.8021	0.9234	0.9188	0.8439	0.8409	0.6546	0.7807	0.8686	0.6806
0.705087	0.0744734	0.82907	0.0650425		23	0.6611	0.8626	0.792	0.6168	0.7454	0.7409	0.6903	0.6923	0.7398	0.8785	0.7559	0.7197	0.6793	0.6425	0.6889	0.6283	0.6436	0.6546	0.6342	0.6342	0.6511	0.7538	0.6196	0.7967		23	0.8669	0.8105	0.8799	0.8128	0.7853	0.8499	0.8241	0.863	0.9227	0.8574	0.9435	0.8525	0.8565	0.8665	0.6711	0.8	0.9248	0.701
0.70555	0.0630182	0.829183	0.0635693		24	0.6751	0.849	0.7795	0.654	0.7151	0.784	0.6796	0.7055	0.7472	0.8142	0.7632	0.7055	0.6942	0.6472	0.69	0.6296	0.6372	0.6607	0.6221	0.6221	0.6716	0.7606	0.6713	0.7547		24	0.8734	0.8244	0.8536	0.8379	0.8048	0.8178	0.818	0.8573	0.9008	0.8073	0.898	0.9284	0.8811	0.8731	0.67	0.77	0.9463	0.7207
0.701283	0.0716919	0.827	0.0626734		25	0.6926	0.831	0.8055	0.6297	0.7326	0.798	0.6526	0.7365	0.7262	0.8229	0.7756	0.7242	0.6866	0.6639	0.6546	0.6217	0.6328	0.6363	0.612	0.612	0.6543	0.7374	0.6205	0.7713		25	0.8904	0.7903	0.8541	0.8378	0.8165	0.8258	0.8291	0.8516	0.8978	0.8078	0.8909	0.8897	0.9048	0.8478	0.6695	0.7647	0.9435	0.7213
0.686475	0.0608691	0.817865	0.0597762		26	0.6813	0.7791	0.7411	0.6198	0.7207	0.7477	0.6382	0.6713	0.7052	0.8037	0.731	0.7018	0.6982	0.6568	0.6682	0.6123	0.6235	0.6268	0.6151	0.6151	0.6504	0.7441	0.6257	0.7983		26	0.9093	0.7946	0.8353	0.8197	0.7975	0.8158	0.829	0.7918	0.8926	0.7941	0.8553	0.8703	0.8454	0.8524	0.7054	0.7476	0.9792	0.7471
0.688208	0.0627532	0.818674	0.0594029		27	0.687	0.8023	0.7557	0.6339	0.711	0.7184	0.6355	0.6706	0.7179	0.8183	0.7621	0.6961	0.6861	0.6412	0.645	0.6215	0.6187	0.6359	0.6248	0.6248	0.6709	0.7283	0.6173	0.7937		27	0.8969	0.8072	0.834	0.8173	0.7443	0.7861	0.8132	0.809	0.9017	0.791	0.9181	0.8318	0.8432	0.8695	0.7029	0.7681	0.9378	0.7342
0.685779	0.0635456	0.825578	0.0623753		28	0.6701	0.8278	0.7588	0.6129	0.701	0.7421	0.6324	0.6826	0.7107	0.8112	0.735	0.7038	0.6672	0.6377	0.6399	0.6097	0.6396	0.6248	0.6165	0.6165	0.6791	0.7504	0.6393	0.7496		28	0.87	0.7942	0.8617	0.8104	0.7855	0.797	0.8391	0.8031	0.9358	0.8054	0.9732	0.8562	0.8873	0.8626	0.6791	0.7869	0.8592	0.721
0.683158	0.0646287	0.818709	0.0623845		29	0.6826	0.7991	0.7258	0.615	0.7081	0.7469	0.6559	0.6859	0.7045	0.8238	0.7678	0.708	0.6658	0.6245	0.6677	0.6292	0.6392	0.602	0.5916	0.5916	0.6564	0.7503	0.6259	0.7282		29	0.8892	0.7941	0.8416	0.829	0.7739	0.7896	0.8279	0.8283	0.8978	0.809	0.9195	0.8525	0.8886	0.8268	0.6661	0.7564	0.9296	0.7076
0.685221	0.0646717	0.823583	0.0616474		30	0.6758	0.8153	0.7498	0.631	0.6909	0.7346	0.6846	0.6604	0.7184	0.8198	0.7519	0.6936	0.6616	0.6437	0.6633	0.6319	0.6239	0.6287	0.5836	0.5836	0.6564	0.752	0.638	0.7525		30	0.9119	0.7942	0.8287	0.8463	0.7901	0.7937	0.8172	0.8662	0.8848	0.7958	0.9024	0.8532	0.8564	0.8597	0.6831	0.7529	0.9401	0.7116
0.680125	0.057422	0.821865	0.0698569		31	0.6531	0.7819	0.7506	0.6224	0.6774	0.7252	0.6655	0.708	0.7088	0.8017	0.7216	0.692	0.6711	0.6422	0.6554	0.6081	0.6296	0.6559	0.5914	0.5914	0.6441	0.7372	0.6452	0.7432		31	0.9094	0.7839	0.8124	0.8386	0.7762	0.7719	0.8176	0.8097	0.9056	0.7792	0.9548	0.8604	0.8733	0.839	0.6657	0.7544	0.9579	0.7105
0.688638	0.061047	0.821613	0.0663862		32	0.6914	0.8046	0.7543	0.6056	0.6738	0.7716	0.7042	0.6939	0.698	0.8153	0.7484	0.7128	0.6483	0.6408	0.6485	0.6136	0.6247	0.6722	0.615	0.615	0.6806	0.7246	0.6319	0.7382		32	0.8923	0.794	0.8698	0.8188	0.825	0.8086	0.818	0.7882	0.9024	0.8131	0.9808	0.821	0.8892	0.8312	0.66	0.7591	0.9116	0.742
0.691496	0.0649904	0.817917	0.0537317		33	0.6887	0.8161	0.7335	0.627	0.6659	0.7569	0.7108	0.684	0.7189	0.8355	0.751	0.7053	0.675	0.6434	0.6681	0.602	0.6245	0.6624	0.6058	0.6058	0.707	0.753	0.6086	0.7467		33	0.8468	0.8076	0.8541	0.8064	0.8325	0.7899	0.8492	0.806	0.9018	0.8074	0.9244	0.8434	0.8831	0.8505	0.6721	0.7511	0.8477	0.7542
0.696279	0.058305	0.820583	0.0567268		34	0.6841	0.8	0.7465	0.6447	0.659	0.7304	0.7683	0.6895	0.723	0.8161	0.7607	0.7052	0.6805	0.6813	0.651	0.599	0.6518	0.6771	0.621	0.621	0.6799	0.7406	0.6307	0.7493		34	0.8746	0.8112	0.8466	0.8234	0.8173	0.8064	0.8345	0.8318	0.8904	0.7898	0.9081	0.8745	0.8697	0.7874	0.6694	0.7725	0.8979	0.7325
0.697442	0.0647426	0.818161	0.0634691		35	0.6622	0.793	0.7991	0.6124	0.6735	0.7353	0.77	0.7162	0.7007	0.8502	0.7393	0.7012	0.6622	0.7025	0.6833	0.5876	0.6467	0.6924	0.6167	0.6167	0.7118	0.7284	0.6254	0.7118		35	0.8996	0.81	0.8375	0.8397	0.7913	0.8021	0.8102	0.8054	0.8836	0.7876	0.9515	0.8489	0.8718	0.8137	0.6925	0.7398	0.9385	0.7084
0.697925	0.0627222	0.816322	0.0594306		36	0.6401	0.7946	0.7685	0.639	0.6513	0.7537	0.8117	0.7033	0.7185	0.8235	0.73	0.6891	0.6516	0.6962	0.6773	0.6253	0.6423	0.723	0.5997	0.5997	0.687	0.7267	0.6677	0.7304		36	0.8755	0.7919	0.8533	0.8581	0.7818	0.8267	0.8329	0.783	0.8784	0.7667	0.9218	0.9086	0.8505	0.802	0.6774	0.7771	0.8572	0.7012
0.710383	0.061997	0.821748	0.0713996		37	0.6784	0.8146	0.7604	0.6323	0.6555	0.768	0.8168	0.7413	0.7138	0.809	0.7374	0.6981	0.6539	0.708	0.6578	0.5995	0.6554	0.7587	0.6327	0.6327	0.7258	0.7525	0.7051	0.7415		37	0.8836	0.7928	0.8412	0.8298	0.7585	0.8306	0.8348	0.8041	0.8904	0.765	0.9161	0.9074	0.8985	0.8111	0.6684	0.7401	0.9666	0.7071
0.7091	0.0660668	0.819617	0.0652764		38	0.6627	0.7838	0.7422	0.6088	0.6978	0.7997	0.8098	0.7703	0.6939	0.8196	0.748	0.6995	0.6617	0.7179	0.6369	0.6022	0.6314	0.7811	0.6324	0.6324	0.703	0.7457	0.6895	0.7481		38	0.898	0.795	0.8495	0.8384	0.7992	0.8193	0.79	0.801	0.887	0.7977	0.9327	0.8241	0.8892	0.8373	0.6892	0.7349	0.9332	0.6933
0.711942	0.0689972	0.818943	0.0613252		39	0.6829	0.7975	0.7278	0.6159	0.6848	0.748	0.847	0.7237	0.716	0.8557	0.7293	0.7228	0.6798	0.7305	0.6387	0.6098	0.631	0.7997	0.6192	0.6192	0.7078	0.7271	0.7481	0.7243		39	0.8985	0.7852	0.8517	0.8523	0.7846	0.7667	0.7983	0.781	0.9075	0.7992	0.9446	0.8391	0.8775	0.8071	0.6895	0.7436	0.9126	0.7368
0.720975	0.0816728	0.814257	0.064418		40	0.6734	0.8326	0.7633	0.6223	0.6738	0.7605	0.8995	0.7584	0.7283	0.8634	0.7279	0.7063	0.6622	0.7436	0.6447	0.5936	0.6254	0.8432	0.6241	0.6241	0.7375	0.7272	0.7331	0.735		40	0.9317	0.7943	0.8547	0.8158	0.7646	0.8043	0.8275	0.7981	0.8963	0.8054	0.9654	0.8378	0.8312	0.7953	0.687	0.7537	0.8795	0.6977
0.716967	0.0751397	0.817117	0.06011		41	0.684	0.7958	0.7349	0.6139	0.6536	0.7495	0.8387	0.7719	0.7305	0.8342	0.7334	0.715	0.6385	0.7227	0.6496	0.5947	0.6225	0.8632	0.6349	0.6349	0.7763	0.7332	0.749	0.7323		41	0.8854	0.7879	0.844	0.7954	0.7807	0.8209	0.8232	0.8158	0.8773	0.8011	0.9611	0.8465	0.8498	0.8163	0.6791	0.7522	0.9019	0.7167
0.723917	0.0686154	0.81163	0.0557819		42	0.6773	0.8383	0.7586	0.6266	0.682	0.7157	0.8065	0.7811	0.7282	0.8179	0.7525	0.7102	0.6531	0.7521	0.6612	0.6048	0.6351	0.8187	0.6453	0.6453	0.7807	0.7604	0.7677	0.7547		42	0.8574	0.8017	0.8383	0.8026	0.7716	0.7743	0.8497	0.8389	0.8922	0.7943	0.8961	0.8815	0.8206	0.8366	0.6985	0.7671	0.8935	0.6849
0.726588	0.0740581	0.810326	0.0546185		43	0.6754	0.8424	0.7285	0.6195	0.6609	0.7293	0.8076	0.7378	0.707	0.8604	0.7849	0.6958	0.6862	0.7888	0.6584	0.6138	0.6407	0.8487	0.6463	0.6463	0.7641	0.7499	0.7919	0.7535		43	0.8605	0.7968	0.8383	0.8352	0.7845	0.8041	0.8581	0.8536	0.8726	0.7882	0.8768	0.8805	0.8185	0.8065	0.6838	0.7694	0.8877	0.6857
0.729304	0.0814414	0.813313	0.055985		44	0.6508	0.859	0.7399	0.6178	0.6629	0.7324	0.8295	0.7903	0.7145	0.8762	0.7171	0.7067	0.6786	0.771	0.6572	0.6331	0.6345	0.858	0.6394	0.6394	0.7838	0.7221	0.8413	0.7478		44	0.8876	0.7899	0.8325	0.8052	0.7937	0.7964	0.8583	0.8364	0.8629	0.8186	0.8797	0.8567	0.8877	0.8189	0.6584	0.783	0.8812	0.7197
0.731187	0.0708497	0.811257	0.0605022		45	0.6579	0.7803	0.7482	0.6312	0.7174	0.7454	0.8268	0.7928	0.7109	0.8624	0.7428	0.7053	0.6888	0.7606	0.6671	0.6036	0.633	0.8274	0.6691	0.6691	0.7867	0.7257	0.8423	0.7537		45	0.8435	0.8316	0.8398	0.8055	0.762	0.7771	0.8719	0.8132	0.8593	0.7875	0.8937	0.9265	0.8897	0.8174	0.6733	0.7369	0.8555	0.6994
0.7222	0.0692659	0.809583	0.0601518		46	0.6802	0.791	0.7526	0.618	0.6584	0.7289	0.8285	0.8137	0.7225	0.815	0.7188	0.7147	0.6611	0.7533	0.6693	0.5937	0.6262	0.7955	0.6691	0.6691	0.7342	0.7284	0.8427	0.7479		46	0.8698	0.8031	0.8551	0.8182	0.7728	0.7778	0.8818	0.846	0.8762	0.7733	0.8938	0.886	0.8627	0.8135	0.671	0.7235	0.8403	0.7162
0.731492	0.0823408	0.800113	0.0572867		47	0.6709	0.8354	0.746	0.6193	0.6801	0.743	0.7954	0.8305	0.7253	0.9056	0.7224	0.7298	0.6796	0.7966	0.6582	0.5957	0.6456	0.786	0.6218	0.6218	0.7701	0.7494	0.8372	0.7901		47	0.8637	0.798	0.842	0.7996	0.7551	0.8053	0.8111	0.8523	0.8914	0.7921	0.8757	0.8081	0.8389	0.8068	0.6553	0.73	0.8693	0.6999
0.746079	0.0760764	0.801657	0.0548903		48	0.7138	0.8378	0.784	0.6644	0.6859	0.7954	0.7412	0.8141	0.724	0.9448	0.7512	0.7554	0.6873	0.7823	0.6954	0.6253	0.6549	0.7888	0.6465	0.6465	0.813	0.7384	0.8267	0.7888		48	0.8585	0.7747	0.8295	0.7928	0.7755	0.815	0.8418	0.878	0.8785	0.7839	0.8401	0.8194	0.8385	0.8435	0.6708	0.7537	0.8773	0.6861
0.753092	0.0813405	0.801104	0.057162		49	0.7039	0.9076	0.7464	0.6641	0.6972	0.8138	0.7744	0.8009	0.7142	0.985	0.7539	0.7239	0.695	0.7526	0.6658	0.6339	0.6714	0.8279	0.7046	0.7046	0.798	0.725	0.8354	0.7747		49	0.8602	0.7896	0.8363	0.8016	0.7753	0.7883	0.8263	0.8881	0.894	0.8059	0.8655	0.8111	0.7954	0.832	0.6603	0.7377	0.8679	0.6929
0.766917	0.0833121	0.804348	0.05459		50	0.6861	0.9286	0.7824	0.6743	0.7303	0.8698	0.8162	0.8451	0.7376	0.9881	0.7851	0.7876	0.6967	0.7538	0.6476	0.6699	0.6722	0.823	0.7297	0.7297	0.8044	0.724	0.7721	0.7517		50	0.8547	0.778	0.8533	0.8046	0.8166	0.8093	0.8066	0.8355	0.8843	0.7847	0.8728	0.8408	0.8158	0.7955	0.6633	0.7586	0.8876	0.6923
0.782929	0.0979027	0.805135	0.057333		51	0.7088	0.9157	0.8828	0.648	0.7867	0.8468	0.7699	0.9985	0.7307	1.0139	0.7935	0.8442	0.6999	0.7455	0.6542	0.6929	0.7	0.7883	0.7203	0.7203	0.8667	0.7359	0.7829	0.7439		51	0.8829	0.7959	0.8298	0.842	0.8084	0.7982	0.8253	0.8347	0.8716	0.7854	0.8633	0.8527	0.8409	0.8055	0.6748	0.7158	0.8934	0.6915
0.803758	0.0984824	0.82037	0.0585906		52	0.7528	0.9449	0.8497	0.6849	0.7876	0.954	0.7823	0.9836	0.757	1.0469	0.7901	0.831	0.6839	0.7647	0.665	0.7132	0.721	0.7633	0.8058	0.8058	0.8998	0.7382	0.7732	0.7915		52	0.8959	0.8141	0.8602	0.8532	0.8165	0.8051	0.8559	0.8778	0.8982	0.8193	0.8643	0.8138	0.8445	0.8552	0.675	0.741	0.8539	0.679
0.821779	0.125454	0.814404	0.0570594		53	0.729	0.968	0.8196	0.7598	0.8697	1.1575	0.7849	0.9331	0.7885	1.1015	0.7745	0.9692	0.6615	0.7857	0.6668	0.7269	0.6932	0.7504	0.7989	0.7989	0.8692	0.7418	0.7529	0.8212		53	0.8664	0.8328	0.8328	0.8087	0.8565	0.7853	0.84	0.8479	0.9006	0.8123	0.8595	0.8468	0.8551	0.8577	0.6724	0.7114	0.8361	0.6884
0.849563	0.125683	0.828339	0.0645198		54	0.7722	1.0953	0.9604	0.7807	0.922	1.1352	0.7647	0.9042	0.7831	1.0908	0.8108	1.0107	0.7158	0.7895	0.6806	0.7452	0.7449	0.7921	0.8233	0.8233	0.8788	0.7535	0.7716	0.8408		54	0.8837	0.8778	0.8519	0.8349	0.833	0.7877	0.8488	0.887	0.903	0.8143	0.891	0.8292	0.8873	0.8143	0.6568	0.7473	0.871	0.6929
0.855129	0.114112	0.831291	0.0607872		55	0.8785	1.0859	0.9872	0.7611	1.0423	0.9756	0.7914	0.972	0.7792	0.9856	0.8629	1.0202	0.7551	0.7502	0.6864	0.794	0.7368	0.7949	0.8073	0.8073	0.9002	0.8004	0.709	0.8396		55	0.8623	0.8713	0.8535	0.8578	0.8702	0.8184	0.8371	0.8698	0.9115	0.8081	0.8795	0.858	0.9165	0.822	0.6604	0.7582	0.8883	0.7102
0.864817	0.115872	0.833204	0.0554074		56	0.886	1.0774	1.0063	0.7928	1.0092	0.9541	0.8536	0.9876	0.8607	1.0022	0.8793	1.0884	0.7775	0.7639	0.696	0.8513	0.7912	0.7858	0.7418	0.7418	0.8396	0.7819	0.6967	0.8905		56	0.8489	0.8423	0.8313	0.829	0.8424	0.8249	0.8696	0.8336	0.9026	0.8239	0.893	0.8331	0.8971	0.8423	0.6903	0.7483	0.8713	0.7076
0.888679	0.132474	0.84513	0.0547473		57	0.8556	1.1267	1.1199	0.8596	1.0721	0.8972	0.8115	0.9516	0.9296	1.0999	0.9491	1.124	0.89	0.7241	0.7209	0.8322	0.828	0.7394	0.7728	0.7728	0.8317	0.8117	0.7413	0.8666		57	0.8766	0.8768	0.8587	0.8097	0.8958	0.8206	0.8633	0.8853	0.9094	0.8355	0.9071	0.8516	0.8601	0.8485	0.6887	0.7722	0.8881	0.7808
0.883771	0.120053	0.846735	0.0559076		58	0.9462	1.1059	1.0142	0.7716	1.0397	0.9388	0.755	0.8962	0.9777	1.0247	1.053	1.0754	0.8829	0.7476	0.7486	0.8428	0.7656	0.7415	0.7704	0.7704	0.8358	0.8532	0.7922	0.8611		58	0.898	0.8768	0.8565	0.8044	0.8699	0.8066	0.8612	0.9576	0.9001	0.8038	0.899	0.8145	0.8515	0.8402	0.7063	0.7849	0.8725	0.7982
0.878054	0.112541	0.844174	0.0535879		59	0.9498	0.9825	1.0157	0.7408	0.965	0.9081	0.8251	0.8988	1.0138	0.9976	1.1228	0.9866	0.9318	0.7624	0.8164	0.813	0.771	0.7581	0.7173	0.7173	0.8676	0.8507	0.7464	0.9147		59	0.8707	0.8695	0.8638	0.8527	0.8372	0.8103	0.8663	0.8796	0.8846	0.8099	0.9158	0.8044	0.8411	0.8434	0.7136	0.8163	0.9229	0.7439
0.869737	0.0999198	0.852461	0.0685459		60	0.8344	0.9717	0.9528	0.748	0.8657	0.8967	0.7929	0.8822	0.9772	1.0465	1.1108	0.9818	0.8271	0.7779	0.8545	0.8522	0.7736	0.7792	0.7478	0.7478	0.9115	0.8251	0.7744	0.9419		60	0.8718	0.8562	0.8726	0.8336	0.8878	0.8039	0.8712	0.9446	0.9387	0.8279	0.9106	0.8335	0.8549	0.8535	0.6713	0.7507	0.932	0.7671
0.866104	0.0940989	0.848504	0.0640495		61	0.8273	0.9574	0.9701	0.7591	0.8685	0.8815	0.7884	0.8453	0.9606	1.0662	1.0114	1.022	0.8071	0.8202	0.865	0.8377	0.7808	0.7343	0.7732	0.7732	0.9122	0.8631	0.7373	0.9246		61	0.8771	0.8545	0.8937	0.8139	0.8412	0.8105	0.8323	0.9773	0.9556	0.819	0.8853	0.7942	0.8538	0.8553	0.6743	0.787	0.8744	0.8421
0.848633	0.0913719	0.855561	0.0616999		62	0.9126	0.9681	0.969	0.7591	0.788	0.8064	0.8207	0.9019	0.9322	1.0346	0.9418	0.9212	0.7539	0.7932	0.8786	0.7904	0.7354	0.8568	0.7209	0.7209	0.9094	0.8232	0.7195	0.9094		62	0.871	0.8425	0.8876	0.836	0.9018	0.8019	0.8175	0.8566	0.9913	0.8473	0.8908	0.8246	0.8854	0.8675	0.6956	0.8218	0.9193	0.8358
0.846433	0.0926095	0.866861	0.0556999		63	0.885	0.936	0.968	0.7606	0.8202	0.9554	0.7795	0.8332	0.8878	1.083	0.9632	0.9074	0.7882	0.7578	0.8665	0.8335	0.7488	0.8126	0.7096	0.7096	0.8837	0.8444	0.7368	0.8436		63	0.8663	0.8892	0.8874	0.865	0.9285	0.83	0.8313	0.8869	0.9559	0.8437	0.8421	0.8461	0.8643	0.8826	0.7304	0.7789	0.9006	0.8582
0.83835	0.0844107	0.871657	0.0757472		64	0.8801	0.9354	0.9289	0.7485	0.8299	0.9092	0.7692	0.816	0.9053	1.0287	0.9219	0.9314	0.8129	0.7817	0.8899	0.8076	0.785	0.7706	0.6849	0.6849	0.8637	0.8362	0.7544	0.8441		64	0.8799	0.8732	0.9053	0.8437	0.8945	0.8591	0.8261	0.8658	0.9361	0.8362	0.9	0.8416	0.8398	0.8701	0.7183	0.7554	0.9533	0.864
0.848958	0.0948898	0.867322	0.0743171		65	0.8135	0.8995	0.9409	0.7637	0.8224	0.9475	0.7524	0.8806	0.9117	1.1019	0.9163	0.9636	0.802	0.8761	0.905	0.8353	0.7919	0.7644	0.6757	0.6757	0.8698	0.8538	0.7933	0.818		65	0.85	0.8994	0.8971	0.857	0.8604	0.9419	0.8035	0.9121	0.9492	0.8217	0.909	0.8317	0.8212	0.8464	0.7242	0.764	0.9559	0.7988
0.848108	0.0846387	0.864861	0.0627837		66	0.8146	0.899	0.883	0.7899	0.846	0.8817	0.7895	0.9197	0.9025	1.0934	0.9132	0.9061	0.8089	0.8326	0.8977	0.8651	0.7661	0.7499	0.7048	0.7048	0.9178	0.8845	0.764	0.8198		66	0.8775	0.8841	0.9052	0.8689	0.8387	0.8947	0.8065	0.9353	0.9309	0.8581	0.9474	0.8011	0.8474	0.849	0.694	0.7869	0.8889	0.8004
0.840954	0.0925388	0.867952	0.0661189		67	0.8508	0.8625	0.9504	0.7536	0.8762	0.8341	0.7781	0.9037	0.9478	1.1047	0.8878	0.8811	0.7792	0.7596	0.9188	0.8303	0.7577	0.7508	0.7037	0.7037	0.8733	0.9116	0.7671	0.7963		67	0.868	0.8554	0.931	0.8881	0.8385	0.925	0.864	0.9575	0.9403	0.8385	0.9321	0.8011	0.867	0.8507	0.6807	0.8231	0.9227	0.7943
0.855883	0.105558	0.867726	0.0621417		68	0.8544	0.8665	0.963	0.8202	0.9377	0.9192	0.8052	0.895	1.0264	1.1214	0.933	0.9564	0.7912	0.7989	0.8665	0.8039	0.749	0.7649	0.6957	0.6957	0.7825	0.9426	0.721	0.8309		68	0.9023	0.8574	0.9262	0.913	0.8894	0.8561	0.8475	0.8679	0.9505	0.8597	0.9084	0.8232	0.8366	0.8751	0.7071	0.7912	0.9937	0.8278
0.854696	0.0971179	0.863813	0.0640021		69	0.8579	0.9214	0.8836	0.8168	0.8607	0.9072	0.8081	0.9309	1.0448	0.9763	0.9728	1.0014	0.7593	0.8204	0.9021	0.8355	0.7424	0.7525	0.6741	0.6741	0.8338	0.9121	0.7647	0.8598		69	0.8981	0.846	0.9178	0.9003	0.8745	0.8825	0.8085	0.9082	0.9708	0.8518	0.87	0.8334	0.8038	0.8419	0.7102	0.7484	0.9853	0.8314
0.847321	0.0832387	0.862661	0.0611076		70	0.7954	0.9013	0.8521	0.8103	0.8392	0.8558	0.8033	0.9742	0.9905	1.014	0.9706	0.9683	0.8021	0.782	0.8786	0.8533	0.7474	0.7578	0.7439	0.7439	0.7971	0.859	0.7679	0.8277		70	0.8825	0.843	0.9022	0.8421	0.8501	0.967	0.8461	0.8823	0.938	0.8185	0.8643	0.854	0.8218	0.8265	0.7376	0.7483	0.9207	0.8851
0.845629	0.0753206	0.875174	0.0591223		71	0.7591	0.9005	0.8225	0.7647	0.8182	0.8956	0.8487	0.9403	0.9206	1.0043	0.9189	0.9698	0.754	0.732	0.9138	0.858	0.7531	0.7744	0.8279	0.8279	0.8288	0.8771	0.7625	0.8224		71	0.8776	0.8748	0.8957	0.8878	0.8419	0.9713	0.8752	0.9015	0.9748	0.8454	0.8851	0.8235	0.828	0.8488	0.7131	0.7783	0.9618	0.8568
0.841167	0.0880752	0.87377	0.0728655		72	0.7896	0.9347	0.8691	0.7713	0.7471	0.8818	0.8452	0.9365	0.9194	1.0677	0.9106	0.9883	0.76	0.7696	0.9041	0.8657	0.7305	0.7442	0.7731	0.7731	0.8273	0.833	0.7495	0.7966		72	0.8541	0.8924	0.8679	0.8745	0.8626	0.916	0.8607	0.8845	0.9421	0.8725	0.93	0.8446	0.8534	0.8709	0.6935	0.7551	0.9296	0.7627
0.846246	0.090104	0.85543	0.0660668		73	0.7808	0.9543	0.8963	0.7837	0.747	0.9064	0.8574	0.9949	0.8996	1.0505	0.9556	0.9042	0.7557	0.8418	0.879	0.85	0.7497	0.7632	0.7324	0.7324	0.813	0.9158	0.7545	0.7917		73	0.8428	0.8783	0.8666	0.8329	0.865	0.9185	0.8353	0.9222	0.9284	0.845	0.9273	0.8235	0.8516	0.8424	0.6936	0.7482	0.8916	0.7327
0.833871	0.0849781	0.853317	0.0652288		74	0.7299	0.9087	0.8855	0.8183	0.7729	0.9224	0.8553	0.8591	0.9004	1.0107	0.9275	0.8686	0.7607	0.8184	0.8666	0.8123	0.7857	0.7314	0.6913	0.6913	0.8288	0.9874	0.7761	0.8036		74	0.8315	0.8554	0.8379	0.8411	0.8569	0.9892	0.8624	0.8529	0.9296	0.8311	0.8619	0.8508	0.8544	0.8393	0.6997	0.7851	0.9641	0.7515
0.842633	0.0748687	0.867722	0.0778883		75	0.7432	0.9041	0.8797	0.8044	0.8434	0.9754	0.8641	0.8754	0.8573	0.9953	0.8809	0.8521	0.7862	0.8164	0.8838	0.8003	0.762	0.709	0.7603	0.7603	0.8298	0.9708	0.7789	0.8901		75	0.8328	0.837	0.8541	0.8269	0.8442	0.9684	0.8104	0.8866	0.9125	0.8588	0.8628	0.8478	0.8594	0.8742	0.7482	0.757	1.0437	0.7855
0.850046	0.0915057	0.872478	0.0654243		76	0.7852	0.8723	0.8095	0.7967	0.8159	1.0007	0.8596	0.8778	0.8643	1.1018	0.8591	0.8577	0.8316	0.8049	0.9127	0.7951	0.7601	0.7626	0.7325	0.7325	0.8053	1.0245	0.802	0.9367		76	0.874	0.8714	0.9124	0.8936	0.84	0.9634	0.8309	0.8765	0.9242	0.8467	0.8856	0.8692	0.8401	0.8615	0.7602	0.7315	0.9126	0.8244
0.850925	0.0923354	0.87207	0.0629282		77	0.8144	0.8866	0.861	0.7474	0.7478	0.9875	0.8477	0.8882	0.8347	1.1221	0.8644	0.8893	0.8498	0.8126	0.9193	0.7887	0.7953	0.7554	0.7687	0.7687	0.7736	1.0211	0.7863	0.8916		77	0.9101	0.8484	0.867	0.8479	0.8251	0.996	0.8546	0.8702	0.9282	0.8525	0.9004	0.8684	0.8368	0.852	0.7199	0.7361	0.9284	0.8951
0.840804	0.102061	0.873152	0.0642839		78	0.7654	0.8973	0.8882	0.7543	0.7111	0.9397	0.8551	0.8772	0.877	1.1681	0.8446	0.8624	0.7737	0.7699	0.8636	0.8453	0.7239	0.78	0.7644	0.7644	0.8049	1.0166	0.7406	0.8916		78	0.9041	0.8912	0.8632	0.8437	0.8082	0.9455	0.856	0.84	0.9176	0.8885	0.9547	0.8532	0.8232	0.908	0.7076	0.7477	0.9181	0.95
0.844446	0.0929164	0.871635	0.0625785		79	0.7892	0.9003	0.8569	0.8381	0.7869	0.8816	0.8204	0.8634	0.8858	1.1627	0.8694	0.819	0.7698	0.7978	0.8218	0.8409	0.7393	0.8256	0.7296	0.7296	0.8372	1.0259	0.7979	0.8776		79	0.8989	0.9336	0.8636	0.8243	0.8776	0.9573	0.8498	0.8167	0.9515	0.9086	0.9262	0.84	0.8569	0.9029	0.688	0.8025	0.9001	0.8834
0.845354	0.0798776	0.872387	0.0631201		80	0.7972	0.9257	0.8642	0.7846	0.7962	0.9642	0.8092	0.9362	0.8317	1.0477	0.8954	0.8308	0.8067	0.7913	0.8113	0.8243	0.7814	0.7847	0.7856	0.7856	0.7963	1.0271	0.7584	0.8527		80	0.8833	0.9341	0.8908	0.8254	0.866	0.9533	0.8298	0.8647	0.9767	0.8882	0.9049	0.8278	0.8816	0.8812	0.6923	0.7818	0.9486	0.8441
0.841063	0.0870756	0.855857	0.0680778		81	0.7948	0.9148	0.8732	0.7926	0.8284	0.9957	0.8725	0.8706	0.8325	1.0111	0.8478	0.9139	0.7746	0.7581	0.8397	0.8567	0.7687	0.7753	0.7038	0.7038	0.7968	1.0178	0.7491	0.8932		81	0.8907	0.8784	0.8731	0.8575	0.8182	1.0015	0.8522	0.844	0.9597	0.8301	0.9088	0.8038	0.8493	0.8908	0.6752	0.8006	0.9359	0.7564
0.844346	0.0886622	0.85487	0.0666753		82	0.7768	0.9187	0.872	0.8596	0.7885	1.0388	0.8784	0.8353	0.8787	1.0039	0.8313	0.9986	0.7461	0.7832	0.7928	0.8278	0.7952	0.777	0.7649	0.7649	0.7462	0.9866	0.7397	0.8593		82	0.8699	0.8702	0.8558	0.8075	0.8198	1.0045	0.8981	0.8766	0.9313	0.8992	0.8881	0.843	0.8888	0.8755	0.6659	0.8437	0.8787	0.7275
0.845442	0.087858	0.858891	0.0701071		83	0.759	0.9195	0.8425	0.796	0.7756	1.0445	0.8391	0.8573	0.9391	0.9781	0.7985	0.9179	0.7844	0.7538	0.8129	0.794	0.807	0.7704	0.8187	0.8187	0.7835	1.0688	0.7713	0.84		83	0.9142	0.8479	0.8824	0.833	0.8449	1.0254	0.863	0.8467	0.9433	0.8995	0.9232	0.8371	0.8731	0.927	0.6759	0.7935	0.8876	0.7374
0.845683	0.097466	0.878291	0.0672635		84	0.7584	0.9184	0.9199	0.7975	0.7425	1.0455	0.8478	0.9151	0.9215	1.0075	0.8317	0.8665	0.7895	0.8204	0.8428	0.7738	0.7293	0.8078	0.7485	0.7485	0.8089	1.0809	0.7459	0.8278		84	0.9215	0.8684	0.904	0.8427	0.8208	1.022	0.8803	0.8535	0.9881	0.8585	0.9724	0.8411	0.8478	0.9691	0.7329	0.8126	0.9235	0.793
0.84655	0.0976365	0.876796	0.0733339		85	0.724	0.9052	0.8916	0.8192	0.7765	1.0789	0.8537	0.9502	0.9037	1.037	0.8482	0.8377	0.7399	0.7669	0.8462	0.769	0.7391	0.8348	0.7706	0.7706	0.8248	1.0243	0.7486	0.8565		85	0.9237	0.8715	0.88	0.7922	0.8697	0.9869	0.8668	0.8426	1.0749	0.8647	0.9757	0.8608	0.8379	0.889	0.7594	0.7938	0.9588	0.7701
0.849908	0.0750109	0.880578	0.0693132		86	0.7907	0.9311	0.879	0.787	0.7953	1.0032	0.8221	0.8512	0.9217	0.965	0.8854	0.863	0.7801	0.8232	0.8543	0.7534	0.8028	0.838	0.7907	0.7907	0.8035	1.0345	0.768	0.8639		86	0.951	0.8627	0.8769	0.8865	0.8823	0.9351	0.8477	0.824	1.0982	0.87	0.9631	0.8383	0.8671	0.8692	0.7485	0.8508	0.9571	0.7838
0.853304	0.0782854	0.882661	0.0643273		87	0.7785	0.9392	0.8569	0.7737	0.8466	0.9075	0.8477	0.8808	0.9012	1.0017	0.8734	0.9214	0.7996	0.843	0.8333	0.7922	0.7326	0.8036	0.8175	0.8175	0.8244	1.075	0.7455	0.8665		87	0.9956	0.8765	0.8843	0.8923	0.8626	0.9444	0.8458	0.822	1.0408	0.8661	0.9655	0.8488	0.8487	0.891	0.7389	0.8751	0.9227	0.8029
0.869729	0.0977702	0.87753	0.0624092		88	0.7415	0.9689	0.8598	0.8279	0.8385	0.9597	0.9231	0.9234	0.9063	1.1529	0.8688	0.9027	0.8063	0.8369	0.8622	0.7969	0.7123	0.8276	0.819	0.819	0.8663	1.0656	0.7601	0.8278		88	0.9269	0.8972	0.9068	0.8513	0.8814	0.9908	0.8614	0.8407	0.996	0.8303	0.962	0.8435	0.8534	0.9224	0.7534	0.8273	0.943	0.7886
0.855563	0.100451	0.897626	0.0638177		89	0.7177	0.9068	0.9474	0.7992	0.7579	1.0278	0.8416	0.9396	0.8896	1.0953	0.9199	0.8457	0.8112	0.8033	0.8232	0.8159	0.7284	0.7439	0.792	0.792	0.8384	1.0576	0.7899	0.8492		89	0.991	0.8934	0.9388	0.8916	0.8694	0.9624	0.8914	0.864	0.9576	0.8532	0.9604	0.8202	0.8765	0.9821	0.7431	0.8082	0.9374	0.8728
0.855833	0.0904952	0.895691	0.0686787		90	0.7846	0.9138	0.943	0.7645	0.7757	1.0492	0.8273	0.8905	0.9079	1.0154	0.9609	0.8569	0.7965	0.8322	0.8058	0.826	0.7182	0.7542	0.8042	0.8042	0.8254	1.0311	0.7846	0.8679		90	0.9655	0.921	0.911	0.8391	0.8639	0.9496	0.8811	0.8527	1.0214	0.8669	0.9065	0.8294	0.8856	1.0343	0.7473	0.8463	0.9536	0.8678
0.857358	0.0871815	0.889591	0.0647611		91	0.7764	0.9044	0.8931	0.7645	0.824	1.1043	0.8356	0.9187	0.8922	0.9918	0.9014	0.8836	0.8345	0.8684	0.8131	0.8628	0.7585	0.8377	0.7641	0.7641	0.7961	0.9902	0.73	0.8671		91	0.8959	0.8731	0.9024	0.8758	0.8935	0.9875	0.9045	0.8544	0.9685	0.866	0.9179	0.838	0.8983	0.9246	0.7376	0.898	0.9287	0.806
0.848742	0.0874111	0.884735	0.0632117		92	0.7458	0.9252	0.867	0.7763	0.8363	1.0119	0.8054	0.939	0.8933	0.9366	0.8745	0.8639	0.8382	0.8005	0.8331	0.8326	0.7151	0.8636	0.7541	0.7541	0.8243	1.065	0.7161	0.8979		92	0.9134	0.9026	0.9112	0.901	0.8388	0.9681	0.8829	0.832	0.9493	0.8466	0.9612	0.8465	0.9012	0.8621	0.7346	0.976	0.8712	0.8224
0.848696	0.0906205	0.900983	0.0701205		93	0.7357	0.9422	0.8596	0.7256	0.7729	0.9887	0.8373	0.9678	0.9045	0.9354	0.8726	0.928	0.8131	0.8156	0.8779	0.8691	0.6995	0.8237	0.7697	0.7697	0.8433	1.0419	0.713	0.8619		93	0.9232	0.9208	0.9462	0.8364	0.8643	1.0258	0.8737	0.8796	0.9661	0.8645	1.0381	0.8453	0.8595	0.9421	0.7373	0.8736	0.9233	0.8274
0.845442	0.0803935	0.890991	0.0658418		94	0.7738	0.8578	0.9077	0.7304	0.7626	1.0363	0.8833	0.9048	0.8387	0.9068	0.9225	0.9016	0.8409	0.9037	0.7847	0.7917	0.7326	0.8389	0.7859	0.7859	0.8348	0.9924	0.7291	0.8437		94	0.8964	0.9056	0.9498	0.8585	0.8588	0.9992	0.8948	0.8167	0.9426	0.8491	0.9842	0.874	0.8952	0.9622	0.7606	0.8655	0.894	0.7962
0.859954	0.0935636	0.88487	0.0607172		95	0.7901	0.8833	0.948	0.7588	0.745	1.0353	0.8632	0.8715	0.8758	0.9535	0.9859	0.8229	0.8405	0.8645	0.7939	0.8054	0.7749	0.8285	0.7995	0.7995	0.8333	1.1335	0.7664	0.8657		95	0.9348	0.9307	0.9067	0.8819	0.8762	0.979	0.8878	0.7862	0.9802	0.8516	0.9402	0.9135	0.8929	0.947	0.7616	0.8595	0.8818	0.7638
0.855471	0.10386	0.886452	0.06114		96	0.7441	0.9172	0.856	0.826	0.8263	1.0578	0.8406	0.9049	0.8852	1.011	1.0134	0.8383	0.7756	0.7976	0.8368	0.8007	0.7425	0.8103	0.7823	0.7823	0.8107	1.1351	0.7346	0.802		96	0.9646	0.9634	0.9745	0.8748	0.8777	0.9397	0.8484	0.8089	0.9987	0.8322	0.9091	0.8808	0.8949	0.9347	0.7683	0.8656	0.9581	0.7876
0.850071	0.106996	0.893948	0.0698741		97	0.7249	0.8521	0.8938	0.8096	0.7951	1.0998	0.8738	0.8882	0.8999	0.9683	0.9308	0.9196	0.7663	0.7754	0.8578	0.754	0.7239	0.8111	0.7734	0.7734	0.7748	1.1325	0.7397	0.8635		97	0.8958	0.9209	0.9415	0.8424	0.9247	0.9584	0.9235	0.8084	0.9766	0.8565	1.0315	0.892	0.891	0.9621	0.7495	0.883	0.9972	0.7637
0.846754	0.102772	0.892783	0.068969		98	0.7704	0.8214	0.895	0.8225	0.8186	1.1116	0.7954	0.9995	0.8927	1.0009	0.8649	0.8905	0.8227	0.7419	0.9124	0.7615	0.7364	0.789	0.7179	0.7179	0.813	1.0028	0.7457	0.8775		98	0.9045	0.8921	0.9192	0.8343	0.8712	1.0079	0.9201	0.7694	0.9797	0.8375	0.9485	0.9064	0.9082	0.9617	0.7747	0.9785	1.018	0.8069
0.845629	0.0888772	0.888287	0.0710687		99	0.7228	0.9104	0.8584	0.7807	0.7663	1.0476	0.7804	0.9121	0.9306	1.0025	0.8601	0.8605	0.8636	0.8248	0.8475	0.7754	0.7455	0.8015	0.7753	0.7753	0.8152	1.0017	0.7299	0.907		99	0.9234	0.8881	0.9215	0.8492	0.8722	0.964	0.934	0.8023	1.0141	0.8391	0.8977	0.9076	0.9317	0.9814	0.7128	0.8856	0.9966	0.7809
0.858812	0.0752735	0.905004	0.0807692		100	0.7768	0.9418	0.912	0.7717	0.8035	1.0182	0.843	0.935	0.9484	0.9745	0.84	0.9013	0.805	0.8738	0.8243	0.837	0.7713	0.7879	0.7948	0.7948	0.8103	0.9457	0.7712	0.9292		100	0.9309	0.8626	0.914	0.8346	0.9278	1.0537	0.9911	0.8427	1.0494	0.8667	0.9277	0.8777	0.9393	0.9966	0.7515	0.8552	1.0259	0.796
0.843562	0.0914998	0.91587	0.0734508		101	0.7429	0.8941	0.9074	0.8021	0.8304	1.0419	0.8049	0.8902	0.9126	0.9734	0.8478	0.9735	0.7557	0.7979	0.859	0.7731	0.7244	0.7783	0.7387	0.7387	0.919	0.9793	0.7314	0.8288		101	0.8972	0.9605	0.9232	0.8315	0.8885	1.0045	1.0072	0.8186	1.0844	0.9015	0.9216	0.8839	0.8984	1.0028	0.8186	0.959	1.0429	0.8591
0.834625	0.0822405	0.901152	0.063638		102	0.7751	0.9044	0.9297	0.8272	0.8673	0.9913	0.7772	0.8233	0.8834	0.8871	0.8722	0.9023	0.7336	0.7879	0.7912	0.7717	0.7221	0.7786	0.7675	0.7675	0.8438	1.0531	0.7518	0.8217		102	0.9132	0.9584	0.8776	0.8839	0.8987	1.0144	0.9461	0.8268	0.9973	0.8774	0.9041	0.9021	0.9133	0.9499	0.8184	0.9906	0.9974	0.8033
0.853679	0.109588	0.907726	0.0657351		103	0.7464	0.915	1.0138	0.8437	0.8202	0.9734	0.8205	0.8975	0.8622	0.9636	0.8726	0.982	0.7855	0.8582	0.7752	0.7675	0.731	0.7915	0.7638	0.7638	0.8294	1.187	0.7074	0.8171		103	0.9617	1.0351	0.9082	0.904	0.8547	0.9488	0.9712	0.8023	1.034	0.8259	0.961	0.8701	0.9342	0.9198	0.7906	0.9709	0.9401	0.8369
0.856038	0.11354	0.922596	0.0776275		104	0.7776	0.9027	1.0348	0.7966	0.8304	0.97	0.8418	0.9827	0.9398	0.9501	0.8458	1.028	0.8294	0.883	0.8245	0.7671	0.6695	0.7634	0.7274	0.7274	0.8045	1.1167	0.7236	0.8081		104	1.0467	0.9712	0.9159	0.8841	0.8988	1.0136	1.0066	0.8069	1.0515	0.8479	1.0002	0.8607	0.8852	0.9873	0.7478	0.9666	0.9738	0.8742
0.851121	0.0941369	0.90063	0.0687902		105	0.7604	0.9164	1.0027	0.8045	0.8094	1.036	0.8724	0.9257	0.9236	0.9273	0.8349	0.9803	0.8546	0.8393	0.8566	0.7911	0.699	0.7825	0.7175	0.7175	0.8384	0.957	0.7191	0.8607		105	1.0111	0.8989	0.909	0.8323	0.8994	0.9668	0.9604	0.8257	1.0322	0.8452	0.9469	0.8529	0.9078	0.9683	0.7672	0.9241	1.0104	0.8546
0.851929	0.0910833	0.897983	0.0763708		106	0.7612	0.8766	0.9927	0.8693	0.775	1.0531	0.8458	0.8445	0.8881	0.9862	0.8601	0.9652	0.8188	0.7556	0.8645	0.8308	0.7585	0.8285	0.7581	0.7581	0.7784	1.001	0.7192	0.857		106	0.9232	0.9733	0.9151	0.8767	0.8703	0.9503	0.871	0.8162	1.0225	0.8498	0.9685	0.8266	0.8712	1.0355	0.8219	0.949	1.0343	0.7697
0.853733	0.096546	0.897965	0.0695013		107	0.8007	0.8492	0.9599	0.8293	0.7612	1.0149	0.8422	0.8457	0.8719	1.0377	0.8873	0.9886	0.716	0.75	0.8011	0.8254	0.748	0.8852	0.8257	0.8257	0.7461	1.065	0.7633	0.8495		107	0.9407	0.9116	0.9581	0.8628	0.8877	1.0133	0.9923	0.8273	1.0037	0.8429	0.9391	0.9057	0.8979	0.9991	0.7679	0.9204	0.9413	0.7998
0.849075	0.0814013	0.900413	0.062975		108	0.8068	0.8592	0.9028	0.8402	0.8534	1.0155	0.806	0.9433	0.885	0.9102	0.891	0.9944	0.7129	0.8281	0.8131	0.7908	0.7485	0.8477	0.7933	0.7933	0.7531	0.9965	0.748	0.8447		108	0.9521	0.9345	0.9338	0.851	0.9127	0.9739	1.0082	0.8227	1.0344	0.836	0.9426	0.9074	0.9053	0.9569	0.8022	0.8753	0.8781	0.828
0.855812	0.0993358	0.916974	0.0671765		109	0.8033	0.9226	0.8748	0.821	0.7739	1.0303	0.8289	0.9487	0.9509	1.0261	0.8936	1.0161	0.804	0.8247	0.7987	0.7653	0.7261	0.8058	0.747	0.747	0.8377	1.0243	0.7156	0.8531		109	1.0034	1.0147	0.9564	0.8665	0.9135	0.9758	0.9626	0.8229	0.9636	0.8247	0.9343	0.8491	0.9679	1.0557	0.8788	0.9186	0.9456	0.8879
0.844483	0.0932779	0.905909	0.0898403		110	0.7519	0.878	0.8282	0.7988	0.7993	0.9818	0.8398	0.98	0.8792	0.9785	0.8512	0.9196	0.7737	0.8933	0.7968	0.7218	0.7645	0.8311	0.766	0.766	0.7752	1.0829	0.7168	0.8932		110	0.9342	1.0261	0.9239	0.8095	0.926	0.9144	0.9277	0.7982	1.0117	0.8172	0.9768	0.8539	0.9095	1.1812	0.8514	0.9095	0.9611	0.9031
0.828638	0.0871707	0.906026	0.0813575		111	0.7786	0.9026	0.8623	0.7916	0.8419	0.9792	0.8211	0.9234	0.8622	0.8817	0.8694	0.8695	0.806	0.7988	0.7722	0.7453	0.7458	0.8006	0.7186	0.7186	0.7624	1.0716	0.6984	0.8655		111	0.897	1.1033	0.9086	0.8588	0.8935	0.9065	0.9342	0.7977	1.0575	0.799	0.9933	0.8809	0.9165	1.0616	0.84	0.8718	0.9605	0.8362
0.832383	0.0829822	0.926361	0.0751142		112	0.7923	0.8519	0.8974	0.8392	0.8538	0.9879	0.8234	0.8779	0.8857	0.9389	0.9031	0.8352	0.7793	0.8045	0.8129	0.7518	0.7517	0.8238	0.7145	0.7145	0.7505	1.0328	0.7127	0.8415		112	0.9413	1.0838	0.9236	0.8386	0.9444	0.931	0.967	0.8378	1.064	0.8286	0.9885	0.8695	0.9733	1.0552	0.8832	0.8536	0.993	0.8318
0.826658	0.0824271	0.9262	0.0716796		113	0.7937	0.8148	0.9384	0.8063	0.7903	0.9377	0.8626	0.8915	0.8871	0.8971	0.8616	0.8143	0.7804	0.816	0.8564	0.7486	0.7095	0.8514	0.71	0.71	0.7992	1.026	0.682	0.8549		113	0.9568	1.075	0.9859	0.8392	0.9118	0.9611	0.9356	0.8314	1.0176	0.8272	0.9922	0.9394	0.9401	1.0412	0.8326	0.8719	0.9844	0.8419
0.816217	0.0840571	0.921313	0.0635134		114	0.8083	0.8457	0.9244	0.7668	0.7623	0.9948	0.7991	0.8458	0.9115	0.8393	0.7879	0.8493	0.74	0.8142	0.8573	0.7432	0.7027	0.8095	0.6979	0.6979	0.8064	1.0004	0.718	0.8665		114	0.9322	1.0574	0.9405	0.8911	0.912	0.962	0.9072	0.814	1.0063	0.8703	0.9761	0.9487	0.9409	0.9885	0.8163	0.921	0.972	0.8413
0.821108	0.0917847	0.898696	0.0645376		115	0.7862	0.9092	1	0.772	0.7722	0.9967	0.7609	0.8571	0.9148	0.87	0.8247	0.8387	0.76	0.8279	0.8421	0.7156	0.7276	0.76	0.6952	0.6952	0.8014	1.0064	0.7413	0.8314		115	0.8973	1.0374	0.9514	0.8692	0.9124	0.9359	0.8918	0.8408	1.0018	0.8934	0.9443	0.8655	0.9442	0.9702	0.8094	0.8585	0.9729	0.8093
0.823217	0.106907	0.907065	0.0826855		116	0.7654	0.8601	0.9393	0.7563	0.7757	0.9681	0.7507	0.8938	0.9615	0.9082	0.7998	0.8541	0.7631	0.7981	0.8369	0.7098	0.7402	0.856	0.7036	0.7036	0.7433	1.1409	0.691	0.8377		116	0.9167	1.1149	0.9095	0.8865	0.9255	0.9066	1.0057	0.8394	1.034	0.8631	0.9519	0.8547	0.9356	1.0244	0.8082	0.8878	0.9659	0.7784
0.83045	0.110097	0.914961	0.0938925		117	0.7369	0.8832	0.9135	0.7764	0.7737	0.9962	0.7352	0.8493	0.9429	0.9238	0.8139	0.933	0.8121	0.8229	0.8446	0.7322	0.737	0.8712	0.6975	0.6975	0.7326	1.1455	0.6926	0.8671		117	0.9513	1.1804	0.9045	0.8638	0.9362	0.8783	1.0093	0.8258	0.9871	0.8816	1.0437	0.836	0.9644	1.0056	0.8163	0.9419	0.9661	0.7824
0.829662	0.0918681	0.918087	0.10021		118	0.7645	0.8865	0.9451	0.7511	0.7575	0.9564	0.7767	0.8216	0.9893	0.9055	0.8231	0.8895	0.8212	0.7669	0.8479	0.7232	0.7255	0.8221	0.7617	0.7617	0.7938	1.0602	0.6997	0.8612		118	0.948	1.2676	0.9254	0.9508	0.9302	0.8585	0.8782	0.8375	1.0053	0.8975	0.9869	0.9046	0.937	1.0261	0.7687	0.9269	0.9336	0.8225
0.821271	0.0882803	0.93123	0.111183		119	0.7477	0.8528	0.9538	0.7059	0.7898	0.9609	0.7667	0.8373	0.8784	0.9233	0.8203	0.8793	0.8066	0.7536	0.8827	0.7072	0.7238	0.7993	0.7735	0.7735	0.7733	1.0244	0.6899	0.8865		119	0.9437	1.3792	0.9272	0.9469	0.867	0.8716	0.8579	0.8578	1.0229	0.9132	0.9346	0.9868	0.959	0.962	0.8328	0.9208	0.9263	0.87
[truncated: 5 more columns]
