# Supplementary material for: Hypoxia controls plasma membrane targeting of polarity proteins by dynamic turnover of PI4P and PI(4,5)P2
Source: eLife. 2022 Jun 9;11:e79582. doi: 10.7554/eLife.79582 (PMC9242647; doi:10.7554/eLife.79582)
Supplement: Figure 2—source data 2. [file elife-79582-fig2-data2.xlsx]

## Sheet: Figure 2A-PLC-PH
Figure 2 Souce Data 2
						1	2	3	4	5	6	7	8	9	10	11	12	13	14	15	16	17	18	19	20	21	22	23	24			1	2	3	4	5	6	7	8	9	10	11	12	13	14	15	16	17	18
WT		RNAi			WT																										RNAi
AVG	STDEV	AVG	STDEV
t_C1_PM/Cy	t_C1_PM/Cy	t_C1_PM/Cy	t_C1_PM/Cy		min	t_C1_PM/Cy	t_C1_PM/Cy	t_C1_PM/Cy	t_C1_PM/Cy	t_C1_PM/Cy	t_C1_PM/Cy	t_C1_PM/Cy	t_C1_PM/Cy	t_C1_PM/Cy	t_C1_PM/Cy	t_C1_PM/Cy	t_C1_PM/Cy	t_C1_PM/Cy	t_C1_PM/Cy	t_C1_PM/Cy	t_C1_PM/Cy	t_C1_PM/Cy	t_C1_PM/Cy	t_C1_PM/Cy	t_C1_PM/Cy	t_C1_PM/Cy	t_C1_PM/Cy	t_C1_PM/Cy	t_C1_PM/Cy		min	t_C1_PM/Cy	t_C1_PM/Cy	t_C1_PM/Cy	t_C1_PM/Cy	t_C1_PM/Cy	t_C1_PM/Cy	t_C1_PM/Cy	t_C1_PM/Cy	t_C1_PM/Cy	t_C1_PM/Cy	t_C1_PM/Cy	t_C1_PM/Cy	t_C1_PM/Cy	t_C1_PM/Cy	t_C1_PM/Cy	t_C1_PM/Cy	t_C1_PM/Cy	t_C1_PM/Cy
1.00745	0.0485277	0.999896	0.0508578		1	1.0635	0.9893	1.087	0.9979	0.9361	1.043	0.929	1.0249	1.0141	1.0303	1.0005	0.9625	1.038	0.9759	1.0762	1.0236	0.9572	1.0691	0.909	1.0527	1.0489	0.968	0.9952	0.987		1	0.9187	0.9912	1.0006	1.0537	0.9692	0.9341	1.0577	1.0073	1.028	1.0389	1.0812	0.9801	0.8627	0.9973	1.0144	0.9961	1.0156	1.0517
1.00624	0.0361277	0.994767	0.040215		2	0.9897	1.09	0.9448	1.0082	0.9973	0.9862	1.0473	1.0242	0.9928	0.9852	1.0089	1.0282	0.9996	1.0707	0.957	0.952	1.0133	1.016	1.03	0.9639	1.0068	1.0132	1.052	0.9725		2	1.0353	0.9649	0.974	0.9718	1.0064	1.0152	0.9924	0.9934	0.9962	0.9227	1.0221	1.0158	1.0095	0.9853	0.9546	0.9784	1.0859	0.9767
0.986325	0.0412195	1.00536	0.0507189		3	0.9468	0.9208	0.9683	0.994	1.0666	0.9708	1.0238	0.9509	0.9932	0.9845	0.9907	1.0093	0.9624	0.9534	0.9668	1.0244	1.0295	0.9149	1.0609	0.9833	0.9443	1.0188	0.9529	1.0405		3	1.046	1.0439	1.0254	0.9745	1.0244	1.0507	0.95	0.9992	0.9758	1.0385	0.8967	1.0041	1.1278	1.0174	1.0311	1.0255	0.8986	0.9716
0.988267	0.0704156	0.998979	0.0542621		4	0.9688	0.9518	1.0384	1.0576	0.9985	0.8747	1.0302	0.9935	0.9491	1.01	0.9334	0.9664	0.8994	0.9111	1.0856	1.016	1.03	0.9415	0.8956	0.9501	1.0226	1.0033	1.201	0.9898		4	0.9521	0.9962	1.0601	1.0709	1.0544	0.9891	0.9862	0.9907	0.968	1.0925	0.9613	0.9974	1.0504	0.956	1.0519	0.9637	1.0114	0.8651
0.990854	0.0739574	1.0124	0.0850658		5	0.9429	0.9886	1.0317	1.0236	0.9599	1.0064	1.0593	1.0252	0.983	1	0.8655	1.105	1.151	0.8393	0.9623	0.9806	0.9588	0.9536	0.8847	1.0159	0.9668	0.9223	1.0568	1.0973		5	0.9862	0.9585	0.9992	1.0514	1.2851	0.9927	0.9622	0.9387	0.8995	1.0311	1.1148	0.9899	1.0553	0.9839	1.0431	0.97	1.1125	0.8901
1.00176	0.0934828	1.00396	0.0693293		6	0.963	1.1182	0.9954	1.1191	0.9604	0.9301	1.0222	1.0195	0.9847	1.1278	0.8014	1.0143	0.9084	0.9046	0.8898	1.0699	0.9745	0.9214	0.9319	1.0025	1.0634	0.9842	1.1946	1.1409		6	1.0036	0.8824	0.9665	1.0805	1.1709	1.0756	1.0597	0.9329	1.0194	1.0423	1.0416	0.9768	1.026	1.046	1.0049	1.0308	1.0949	0.9546
1.01305	0.0815782	1.1503	0.133954		7	1.0598	1.0413	1.0253	1.0476	0.9666	0.9907	1.147	1.058	1.004	1.0324	0.8817	0.983	1.0492	0.8977	1.021	0.9332	1.0597	1.0465	0.8183	1.0212	0.9297	1.1574	1.144	0.9978		7	0.9621	1.1669	1.1682	1.2839	1.3357	1.3888	1.0598	1.2962	1.3543	1.1646	1.3554	1.2858	1.122	1.1258	1.0269	1.1675	1.0587	1.0372
1.06314	0.0985587	1.23319	0.157346		8	1.1079	0.9699	0.955	1.0363	1.0702	0.9499	1.0589	1.155	1.0415	1.1917	0.9347	1.0796	1.1894	0.9506	1.0264	1.0119	1.1202	1.1519	0.9116	0.9827	1.0367	1.2674	1.2343	1.0817		8	1.0816	1.2356	1.2291	1.4527	1.4786	1.3558	1.1006	1.2855	1.5071	1.1897	1.2909	1.228	1.0484	1.1977	1.1225	1.5948	1.0406	1.1169
1.16272	0.159666	1.23463	0.197764		9	1.0867	1.2994	1.0312	0.9911	1.1598	1.0781	1.001	1.3361	1.1916	1.3892	1.2441	1.0799	1.6024	1.1512	1.156	1.0241	1.2696	1.1367	1.1134	1.0106	0.8446	1.3445	1.2016	1.1623		9	0.9665	1.1966	1.4267	1.5683	1.5466	1.2653	1.0866	1.4788	1.4835	1.0802	1.5615	1.2952	1.0764	1.0192	1.2432	1.2655	1.0723	1.0963
1.19317	0.152206	1.23578	0.162297		10	1.0108	1.2998	1.153	1.1279	1.0485	1.0804	1.0902	1.1286	1.1422	1.6223	1.292	1.091	1.4768	1.1238	1.1324	1.1064	1.4302	1.1492	1.1759	1.115	1.069	1.3608	1.3102	1.0997		10	1.0747	1.168	1.3226	1.5197	1.2771	1.514	1.0375	1.4516	1.5594	1.2394	1.4393	1.2307	1.2214	1.1176	1.2528	1.2797	1.0497	1.1652
1.1938	0.152332	1.23001	0.147984		11	0.9836	1.2599	1.1448	1.0905	1.0871	1.1051	1.0257	1.3203	1.0746	1.5331	1.2283	1.0931	1.5013	1.2007	1.2484	1.0703	1.3627	1.3371	1.1712	1.2209	0.9966	1.3105	1.296	0.9893		11	0.9375	1.1693	1.2372	1.3032	1.3243	1.3371	1.2541	1.3331	1.3951	1.2162	1.4406	1.4218	1.1668	1.1172	1.4016	1.4261	1.0416	1.0909
1.214	0.169672	1.17593	0.168186		12	0.9654	1.4118	1.1355	1.0776	1.1089	1.3154	1.1138	1.1476	1.1889	1.7406	1.289	1.1133	1.3689	1.2424	1.183	1.2572	1.4648	1.0377	1.2653	1.1782	1.0994	1.2553	1.2199	0.956		12	0.8967	1.0522	1.3246	1.4926	1.3124	1.2966	1.1974	1.2117	1.4179	1.0727	1.3702	1.2007	1.0698	1.1323	1.3062	1.458	0.9627	1.0362
1.20477	0.15406	1.19896	0.185566		13	1.0104	1.5119	1.0153	1.1297	1.1979	1.1404	1.0914	1.2998	1.1698	1.4383	1.3353	1.1417	1.4654	1.0976	1.2529	1.0761	1.4606	1.0805	1.3235	1.2809	1.0641	1.1743	1.1724	0.9844		13	0.8664	1.2705	1.3587	1.4543	1.3761	1.3618	1.1207	1.4496	1.3911	1.0769	1.367	1.2993	0.9753	1.0711	1.1822	1.5621	1.0115	1.1429
1.18056	0.159745	1.16855	0.202314		14	0.9556	1.2996	1.0063	1.1263	1.1913	1.0933	1.1095	1.2299	1.1289	1.5504	1.4199	1.1216	1.579	1.1015	1.1863	1.0957	1.2948	0.9817	1.2076	1.1447	1.1083	1.2496	1.1613	0.9903		14	0.8804	1.1366	1.1849	1.5525	1.3741	1.238	1.0549	1.3702	1.4744	1.1202	1.41	1.2911	0.9671	1.1535	1.1702	1.4174	0.978	0.9662
1.16667	0.173646	1.15267	0.17299		15	0.843	1.383	0.9948	0.9871	1.2015	1.0366	1.0753	1.2879	1.2322	1.5521	1.3585	1.0823	1.3235	1.2056	1.2858	1.124	1.463	1.0139	1.1536	1.1487	0.9819	1.1611	1.1709	0.9337		15	1.2161	1.145	1.1592	1.4586	1.3766	1.4363	1.0283	1.1579	1.3955	1.097	1.2844	1.2223	0.9719	1.0803	1.1248	1.4466	0.8972	0.9506
1.1263	0.150664	1.12866	0.159959		16	0.9395	1.3567	0.9784	1.037	1.1131	1.0024	0.9897	1.1914	1.1087	1.5383	1.1383	1.0947	1.372	1.0759	1.2015	1.0526	1.3224	1.0448	1.0534	1.0791	0.926	1.1862	1.2241	1.0049		16	0.9558	1.059	1.1518	1.5394	1.3841	1.2407	1.0829	1.1949	1.4025	1.1079	1.2422	1.2026	0.9971	0.9761	1.1918	1.2803	1.0699	0.9242
1.13762	0.163896	1.08567	0.165416		17	1.0278	1.4358	1.0534	1.1396	1.134	0.978	1.0864	1.1994	0.9919	1.615	1.2365	0.9846	1.2896	0.9316	1.2041	1.0166	1.3266	1.0844	1.1298	1.0727	1.048	1.2054	1.2009	0.9108		17	0.8583	0.9691	1.1865	1.3535	1.2479	1.2999	0.9698	1.1592	1.4198	0.9786	1.3066	1.2481	0.9163	1.0872	1.231	1.1551	0.9307	0.9562
1.12499	0.16281	1.05807	0.137281		18	0.8715	1.3933	1.0387	0.9736	1.0609	1.0201	1.0094	1.2859	1.1013	1.4763	1.2925	1.0181	1.3657	1.0189	1.1288	1.0264	1.3657	1.1384	1.0695	1.0556	0.9154	1.1945	1.2101	0.9692		18	0.8045	1.0524	1.0462	1.3269	1.0824	1.1937	0.9382	1.0784	1.2553	0.9898	1.29	1.0811	0.9397	1.0363	1.1816	1.2394	0.9302	1.0285
1.13988	0.159488	1.03778	0.135672		19	0.8935	1.4629	0.9354	1.0891	1.0329	1.1401	1.0695	1.2206	1.0607	1.4359	1.3423	1.128	1.3156	0.9655	1.1912	1.121	1.4002	1.0797	1.046	1.1197	1.0728	1.2634	1.0377	0.9335		19	0.8376	1.0082	1.0894	1.2922	1.0341	1.1821	0.8918	1.0957	1.2337	1.0283	1.1805	1.1486	0.89	1.0976	1.2378	1.1868	0.9211	0.9075
1.0927	0.138988	0.979312	0.114111		20	0.8554	1.2762	1.014	1.0337	1.052	1.0664	0.9378	1.1782	1.0242	1.4258	1.2276	1.0206	1.3081	0.9795	1.1164	1.033	1.327	0.9681	1.0166	1.0541	1.0319	1.21	1.0914	0.9767		20	0.91	0.961	1.0223	1.1933	1.0155	1.0366	0.8897	1.0189	1.1219	0.8918	1.173	0.9939	0.9444	0.9294	1.052	1.1471	0.842	0.8539
1.10851	0.16101	0.967338	0.0997853		21	0.8328	1.4206	1.113	1.0973	1.0069	0.9756	1.048	1.2659	1.0371	1.4692	1.3283	1.0345	1.229	0.9207	1.179	1.0996	1.2205	1.0249	0.9718	0.9559	1.0621	1.2088	1.1966	0.9061		21	0.8817	0.9406	1.0249	1.2178	1.0211	1.0092	0.9639	1.0296	1.0927	0.9435	1.1381	0.9804	0.8924	1.0281	1.01	1.0171	0.8279	0.8412
1.10197	0.164381	0.936833	0.115763		22	0.9215	1.4095	1.0372	0.916	0.9474	1.0654	1.0664	1.1733	0.9676	1.434	1.2291	1.0215	1.4123	1.0796	1.1353	0.9856	1.3584	1.0358	0.9307	0.9888	1.0738	1.1373	1.2084	0.9124		22	0.8422	0.8775	0.9059	1.1867	1.0548	0.9971	0.8343	0.9964	1.0218	0.7929	1.1535	1.0098	1.0104	0.8661	1.0478	1.0887	0.8307	0.8482
1.09392	0.157562	0.897787	0.0961334		23	0.9097	1.3753	1.0637	1.0721	0.9614	0.9775	0.9883	1.1408	1.0731	1.4774	1.2616	0.9342	1.222	0.9317	1.3093	0.9932	1.3392	1.0751	0.9566	1.0129	0.9874	1.1178	1.0974	0.9765		23	0.7867	0.8337	0.9534	1.1104	1.0302	0.8428	0.7607	0.9221	1.0878	0.7779	0.9637	0.9687	0.9157	0.897	0.9567	0.9766	0.852	0.8285
1.09118	0.146371	0.850675	0.0879294		24	0.9055	1.397	1.0176	1.0612	1.0453	1.018	0.9598	1.0075	0.9888	1.4056	1.2507	0.98	1.2073	1.1177	1.1637	1.2031	1.3402	0.9902	0.9445	0.9674	1.0358	1.2044	1.0164	0.9605		24	0.7628	0.9157	0.8804	0.9871	0.9571	0.8954	0.7739	0.948	1.0058	0.7608	1.0053	0.8879	0.8327	0.8165	0.8959	0.8973	0.7978	0.7763
1.04857	0.143036	0.818983	0.0932083		25	0.8806	1.2468	1.0226	0.9248	0.9626	0.8291	0.9839	1.1199	0.947	1.4187	1.0798	0.9844	1.2294	0.9567	1.2161	1.1061	1.2419	1.0022	0.9835	0.97	1.0137	1.1736	0.9874	0.8849		25	0.7881	0.7081	0.8313	0.971	0.9393	0.8398	0.7452	0.9185	0.8905	0.7918	1.0345	0.8372	0.764	0.7793	0.9255	0.8954	0.7008	0.723
1.04121	0.138457	0.795013	0.0790596		26	0.9181	1.2741	0.9004	1.0831	0.9308	0.9635	0.841	1.0319	1.0063	1.3818	1.1259	1.025	1.238	0.9951	1.091	1.0372	1.3021	1.006	0.9613	0.9566	0.9603	1.029	1.0713	0.8593		26	0.6991	0.7334	0.8275	0.9048	0.8601	0.8773	0.7148	0.8762	0.8913	0.7598	0.9781	0.8454	0.8291	0.7653	0.828	0.7979	0.6726	0.729
0.993217	0.158325	0.761592	0.0884794		27	0.7997	1.4213	0.9677	0.9315	0.9416	1.0116	0.8611	1.0242	0.8974	1.3716	1.029	1.0056	1.1207	0.9173	1.025	0.8575	1.2564	0.9239	0.9096	0.8953	0.9069	0.9492	1.0057	0.8074		27	0.7438	0.7113	0.8108	0.9083	0.837	0.8645	0.7127	0.8109	0.9473	0.6869	0.8817	0.7803	0.7478	0.7227	0.7963	0.7742	0.597	0.6688
0.991637	0.140492	0.727904	0.0917692		28	0.7964	1.2261	0.9132	0.9648	0.8684	0.8884	0.9217	1.0213	0.8642	1.3454	1.1313	0.9559	1.1522	0.9682	1.0651	0.9903	1.2006	0.9275	0.9219	0.9351	1.0289	1.0703	0.8797	0.7624		28	0.6372	0.7005	0.6993	0.8979	0.793	0.8443	0.6512	0.7403	0.8988	0.6654	0.9421	0.7627	0.7137	0.7025	0.8126	0.6919	0.6082	0.6442
0.960588	0.136708	0.70365	0.0751898		29	0.6979	1.193	0.8756	0.8885	0.9196	1.0215	0.8797	0.8824	0.7823	1.2542	1.1311	0.8669	1.0958	0.9411	1.0714	1.0242	1.1927	0.9416	0.9029	0.8952	0.9444	0.896	0.9311	0.825		29	0.6276	0.6706	0.7424	0.8067	0.8245	0.7418	0.6182	0.7461	0.8522	0.6928	0.856	0.7161	0.6777	0.6896	0.7149	0.7382	0.5938	0.6077
0.937158	0.129054	0.672967	0.0832889		30	0.7733	1.1141	0.8476	0.9398	0.8479	0.8327	0.8368	0.9095	0.8091	1.2446	0.9912	0.8071	1.0807	1.01	1.0776	0.8919	1.2089	0.8365	0.9022	0.9043	0.9566	0.9205	0.9579	0.791		30	0.5515	0.6688	0.7109	0.8227	0.7715	0.7982	0.6466	0.7261	0.7882	0.5808	0.7673	0.7121	0.6485	0.6441	0.7114	0.7278	0.547	0.597
0.895142	0.121926	0.652875	0.0731981		31	0.7299	1.1376	0.836	0.8751	0.8024	0.8696	0.8039	0.9708	0.7327	1.1087	1.0822	0.8389	1.0653	0.8421	1.0458	0.8836	1.0405	0.7737	0.8781	0.802	0.8639	0.8567	0.8761	0.7678		31	0.5341	0.6345	0.7073	0.7375	0.781	0.7209	0.6199	0.6883	0.7934	0.6089	0.7555	0.6945	0.6072	0.6332	0.6875	0.7173	0.5764	0.6045
0.872787	0.136065	0.635446	0.0816685		32	0.7277	1.1158	0.8453	0.7952	0.8019	0.8394	0.801	0.8065	0.6818	1.1976	0.9784	0.7688	1.0728	0.8806	1.0296	0.8544	1.0299	0.8374	0.7481	0.7719	0.8178	0.9806	0.8583	0.7061		32	0.5239	0.5996	0.632	0.7781	0.6854	0.7567	0.644	0.6743	0.7709	0.5506	0.7722	0.6787	0.6211	0.6484	0.6813	0.6865	0.5011	0.5535
0.853692	0.128279	0.61105	0.0747195		33	0.6975	1.0703	0.8661	0.9024	0.8349	0.7924	0.731	0.8746	0.7225	1.0589	0.9993	0.7373	1.0527	0.7806	0.9273	0.8095	1.1363	0.7332	0.7662	0.7584	0.8247	0.8559	0.8658	0.6908		33	0.5057	0.5478	0.5764	0.7809	0.6829	0.6905	0.5611	0.678	0.6874	0.5871	0.7586	0.6427	0.6123	0.6406	0.6494	0.6289	0.4959	0.5252
0.8332	0.120898	0.596687	0.0722674		34	0.6234	1.0519	0.8196	0.8151	0.7611	0.8053	0.7387	0.8766	0.6655	1.0727	0.9482	0.7125	0.9428	0.8499	0.9749	0.9071	1.0024	0.7455	0.765	0.8508	0.8363	0.7866	0.7854	0.6595		34	0.4669	0.583	0.6098	0.7602	0.6349	0.6795	0.5368	0.6495	0.6964	0.6038	0.7127	0.6434	0.573	0.5705	0.6048	0.6105	0.4701	0.5262
0.800775	0.10324	0.583175	0.0749865		35	0.6753	0.9988	0.8007	0.7792	0.7448	0.7764	0.7338	0.8198	0.6708	0.9847	0.873	0.6963	0.9678	0.8305	0.8965	0.8546	0.9449	0.7915	0.7436	0.6533	0.7905	0.76	0.7914	0.6404		35	0.4758	0.5366	0.6263	0.721	0.6562	0.6388	0.5499	0.6305	0.7163	0.5333	0.7393	0.6408	0.5422	0.5295	0.606	0.611	0.4707	0.5303
0.785737	0.11107	0.574446	0.0677327		36	0.6038	1.0201	0.7414	0.7474	0.7193	0.6921	0.6897	0.7988	0.6283	0.9933	0.8708	0.7242	0.9386	0.7862	0.9341	0.8131	0.9289	0.8014	0.7772	0.7494	0.7607	0.7715	0.7049	0.6625		36	0.4739	0.5383	0.5893	0.7285	0.6207	0.6144	0.5532	0.6384	0.7056	0.5491	0.6755	0.6113	0.5633	0.5306	0.6097	0.5839	0.4651	0.5222
0.7674	0.10044	0.559037	0.0664213		37	0.6253	0.9981	0.7799	0.7185	0.6691	0.7106	0.6837	0.8151	0.6279	0.936	0.8894	0.7317	0.8353	0.7491	0.8139	0.8172	0.9259	0.7155	0.7733	0.7243	0.8211	0.7376	0.7015	0.6176		37	0.4522	0.5203	0.5906	0.7085	0.6161	0.5922	0.5177	0.6326	0.6391	0.5281	0.6718	0.5864	0.5272	0.505	0.5771	0.6269	0.4659	0.5039
0.734504	0.0894103	0.5529	0.0630659		38	0.5747	0.9062	0.689	0.7218	0.6533	0.7006	0.7626	0.7629	0.5789	0.9133	0.8412	0.7171	0.8067	0.768	0.8074	0.7151	0.8191	0.7109	0.6917	0.6474	0.7565	0.7677	0.717	0.599		38	0.4786	0.5218	0.5989	0.6778	0.6022	0.5834	0.5338	0.605	0.6516	0.515	0.6814	0.615	0.5335	0.537	0.543	0.5909	0.4552	0.4787
0.716512	0.091125	0.551521	0.0737453		39	0.6376	0.8643	0.7603	0.7397	0.6535	0.6795	0.6372	0.7256	0.559	0.9119	0.8151	0.6284	0.8006	0.718	0.767	0.7793	0.8413	0.7472	0.6425	0.6225	0.7403	0.6602	0.6878	0.5775		39	0.4542	0.512	0.5932	0.705	0.6197	0.6015	0.4999	0.6222	0.6951	0.5257	0.6718	0.5852	0.5026	0.5226	0.5563	0.6131	0.441	0.4915
0.700821	0.100467	0.541896	0.0741948		40	0.5186	0.8723	0.6784	0.6971	0.6095	0.678	0.6568	0.7235	0.5519	0.8953	0.7866	0.5994	0.8886	0.6868	0.7526	0.7163	0.8504	0.6608	0.7239	0.6591	0.6788	0.6566	0.6912	0.5872		40	0.4316	0.4851	0.5863	0.6966	0.6083	0.6804	0.4809	0.5943	0.6408	0.5093	0.6547	0.5895	0.4812	0.5144	0.533	0.5787	0.4488	0.4925
0.69705	0.106462	0.531558	0.0725102		41	0.5062	0.9016	0.6344	0.6997	0.6329	0.6933	0.7063	0.6679	0.5278	0.9271	0.7895	0.6519	0.7868	0.7146	0.7767	0.6873	0.8807	0.7046	0.6293	0.6008	0.703	0.6759	0.6656	0.5653		41	0.4477	0.4785	0.5891	0.7204	0.5865	0.5596	0.4974	0.5941	0.6332	0.5269	0.6521	0.5818	0.4964	0.4901	0.5031	0.5834	0.4216	0.4565
0.692008	0.103069	0.527617	0.0642296		42	0.5318	0.9029	0.6595	0.6503	0.5987	0.6697	0.6688	0.7011	0.5444	0.8548	0.8012	0.6112	0.773	0.7348	0.8404	0.7122	0.8444	0.7094	0.6687	0.5905	0.6819	0.6198	0.7023	0.5364		42	0.4603	0.4671	0.5628	0.6733	0.6017	0.5859	0.509	0.5961	0.6433	0.4922	0.5895	0.5608	0.5003	0.4926	0.5295	0.5911	0.4313	0.4785
0.664104	0.0988438	0.522479	0.0671159		43	0.5117	0.8114	0.63	0.6448	0.5526	0.6568	0.6356	0.6826	0.5197	0.8675	0.7445	0.5722	0.8052	0.7101	0.714	0.6994	0.8397	0.643	0.6418	0.6234	0.6964	0.5864	0.6262	0.5235		43	0.417	0.4716	0.5527	0.6526	0.5818	0.61	0.5057	0.571	0.6325	0.4919	0.622	0.5537	0.4586	0.485	0.5286	0.6056	0.4236	0.4898
0.663167	0.100567	0.524342	0.0677341		44	0.489	0.8324	0.6268	0.6629	0.5744	0.6504	0.624	0.6339	0.5163	0.8008	0.7548	0.5818	0.8554	0.6309	0.7881	0.7312	0.8089	0.6987	0.6192	0.64	0.6373	0.6167	0.612	0.5301		44	0.4323	0.4759	0.5643	0.6926	0.5852	0.6109	0.5128	0.5987	0.625	0.5046	0.5935	0.5573	0.5144	0.4882	0.4978	0.5625	0.4233	0.4656
0.642242	0.0885042	0.512517	0.0687474		45	0.4923	0.7877	0.6193	0.7238	0.581	0.6388	0.613	0.653	0.5102	0.8317	0.6926	0.555	0.724	0.6583	0.7105	0.6773	0.7902	0.6417	0.6111	0.5882	0.5992	0.5874	0.6154	0.5121		45	0.4232	0.4837	0.5405	0.6626	0.584	0.5775	0.5027	0.5858	0.6163	0.4682	0.602	0.5642	0.4922	0.4765	0.4907	0.5842	0.4159	0.4473
0.632275	0.0856491	0.518446	0.0656397		46	0.4873	0.7809	0.6033	0.6271	0.5138	0.6167	0.6327	0.6582	0.4967	0.7558	0.7326	0.5769	0.7308	0.634	0.7466	0.6618	0.7719	0.6037	0.6131	0.5618	0.646	0.5974	0.5992	0.5263		46	0.4287	0.4756	0.5373	0.6481	0.5843	0.6051	0.4775	0.5925	0.6118	0.4721	0.614	0.5709	0.4962	0.4695	0.4883	0.5939	0.4271	0.4734
0.629412	0.0929994	0.514208	0.0664192		47	0.4605	0.802	0.5874	0.6491	0.5322	0.5911	0.6158	0.635	0.5031	0.766	0.6967	0.5413	0.7829	0.645	0.6994	0.6366	0.7764	0.6487	0.5933	0.5941	0.6832	0.5898	0.593	0.4833		47	0.4112	0.4744	0.5669	0.6431	0.5485	0.6392	0.4803	0.5845	0.6006	0.4948	0.5841	0.564	0.4711	0.4632	0.4833	0.5794	0.4111	0.4626
0.62	0.0971235	0.513967	0.0633807		48	0.4549	0.8237	0.6013	0.609	0.5215	0.6038	0.5812	0.6629	0.4887	0.7737	0.7005	0.5226	0.6974	0.6284	0.6985	0.642	0.804	0.5998	0.5805	0.5693	0.6587	0.5756	0.6136	0.4684		48	0.416	0.4886	0.5718	0.6383	0.5452	0.5634	0.4812	0.5733	0.6211	0.4924	0.5833	0.5672	0.4749	0.4871	0.5065	0.5957	0.4111	0.4582
0.617896	0.086183	0.510775	0.0656948		49	0.4385	0.7698	0.5882	0.6123	0.5476	0.6106	0.6065	0.6389	0.4864	0.755	0.6549	0.5556	0.7521	0.68	0.7143	0.6454	0.727	0.6154	0.5664	0.59	0.6092	0.5792	0.6053	0.4809		49	0.4225	0.4505	0.5478	0.6435	0.5544	0.5551	0.4787	0.5957	0.6165	0.4775	0.5943	0.5581	0.4573	0.4947	0.4903	0.5992	0.3999	0.4618
0.612904	0.10138	0.5088	0.0672818		50	0.4358	0.836	0.5775	0.6082	0.531	0.5972	0.5627	0.6661	0.4813	0.7594	0.699	0.534	0.7632	0.5989	0.71	0.6643	0.7557	0.5765	0.5786	0.5481	0.6397	0.5314	0.5794	0.4757		50	0.4116	0.4658	0.5569	0.6446	0.5816	0.5674	0.4564	0.5857	0.6119	0.4706	0.6011	0.5462	0.4667	0.4559	0.5086	0.5851	0.4095	0.4781
0.605092	0.0892025	0.509379	0.0653337		51	0.4344	0.7845	0.5676	0.6009	0.5303	0.5699	0.594	0.6326	0.4703	0.7126	0.6948	0.5324	0.7326	0.6409	0.6596	0.63	0.7507	0.5948	0.5677	0.5399	0.6373	0.5532	0.6184	0.4728		51	0.4022	0.4625	0.5206	0.6448	0.573	0.5723	0.4795	0.5943	0.6142	0.4665	0.6066	0.5488	0.4697	0.4757	0.4972	0.5789	0.4312	0.4563
0.595333	0.083778	0.509008	0.0650796		52	0.4442	0.7728	0.5625	0.568	0.5248	0.5891	0.5697	0.6117	0.4836	0.7278	0.7242	0.5344	0.6712	0.6374	0.6593	0.623	0.6947	0.6049	0.5564	0.5338	0.6072	0.5278	0.5931	0.4664		52	0.4225	0.4556	0.5468	0.6425	0.5526	0.5915	0.4781	0.5809	0.614	0.469	0.592	0.5536	0.4818	0.4548	0.4916	0.5864	0.4108	0.4639
0.591092	0.0825498	0.508121	0.0660768		53	0.4141	0.7334	0.5593	0.5641	0.5333	0.5942	0.579	0.6362	0.4774	0.7212	0.6534	0.5146	0.6546	0.6326	0.6673	0.6751	0.7175	0.5635	0.5741	0.5276	0.6011	0.5333	0.5914	0.4679		53	0.417	0.4417	0.5813	0.6411	0.5662	0.568	0.4705	0.5834	0.6049	0.4807	0.5882	0.5394	0.4693	0.4815	0.5016	0.5812	0.4053	0.4463
0.588533	0.0786923	0.513225	0.0680656		54	0.4406	0.7271	0.5434	0.6002	0.517	0.5869	0.5658	0.5928	0.4609	0.7073	0.6826	0.5213	0.7003	0.6031	0.6662	0.6505	0.687	0.5832	0.5627	0.5463	0.604	0.5316	0.5585	0.4855		54	0.4085	0.4649	0.5428	0.642	0.5596	0.583	0.501	0.5864	0.6097	0.4639	0.6335	0.5535	0.4719	0.4575	0.4886	0.6112	0.4297	0.4764
0.582079	0.0817401	0.508904	0.0632977		55	0.4134	0.7653	0.5526	0.5914	0.5113	0.5554	0.5533	0.6181	0.47	0.6844	0.6701	0.5163	0.6749	0.5977	0.675	0.6108	0.6796	0.5692	0.5545	0.5375	0.5928	0.5207	0.5879	0.4677		55	0.411	0.4455	0.5566	0.6518	0.5506	0.5614	0.4986	0.5839	0.5951	0.458	0.596	0.5423	0.4822	0.4778	0.4751	0.5853	0.4261	0.4764
0.585571	0.0833646	0.50785	0.0680985		56	0.4276	0.7523	0.5509	0.5779	0.5196	0.6028	0.5678	0.6484	0.4557	0.7066	0.7094	0.5151	0.649	0.6137	0.662	0.6345	0.6756	0.5526	0.5487	0.5394	0.5966	0.5194	0.5622	0.4659		56	0.4071	0.4661	0.5449	0.6488	0.573	0.5591	0.4675	0.6117	0.595	0.4703	0.597	0.5596	0.4754	0.4564	0.4803	0.5781	0.4053	0.4628
0.573983	0.0774967	0.507142	0.0663596		57	0.415	0.7205	0.5525	0.5783	0.4907	0.5809	0.5477	0.5927	0.4604	0.6706	0.6439	0.5037	0.6999	0.5855	0.6516	0.6198	0.6602	0.5779	0.5423	0.5328	0.5922	0.5304	0.5718	0.4543		57	0.4152	0.4418	0.5369	0.6371	0.5527	0.5879	0.4735	0.5961	0.6196	0.4629	0.5884	0.5575	0.4826	0.4566	0.4897	0.5815	0.4142	0.4575
0.578621	0.0840258	0.505996	0.0666606		58	0.4273	0.7634	0.5653	0.5703	0.4961	0.5502	0.5673	0.6074	0.4522	0.6712	0.6625	0.5178	0.6871	0.5877	0.6751	0.6148	0.7008	0.5685	0.5441	0.5098	0.6015	0.5201	0.5647	0.4617		58	0.4177	0.4491	0.5435	0.6421	0.5411	0.5745	0.4815	0.5943	0.6054	0.4595	0.6181	0.5457	0.4816	0.458	0.5096	0.5704	0.4216	0.4493
0.572196	0.0750303	0.507604	0.0607808		59	0.4202	0.7232	0.5623	0.5851	0.4961	0.5609	0.5458	0.5892	0.4695	0.6799	0.6368	0.5094	0.6361	0.5887	0.6493	0.588	0.6974	0.5796	0.5505	0.5106	0.5965	0.5284	0.5714	0.4578		59	0.4234	0.4584	0.5464	0.6376	0.5525	0.5817	0.4838	0.5771	0.6041	0.4716	0.5721	0.5459	0.4919	0.4685	0.4988	0.5704	0.4064	0.4757
0.575417	0.0850316	0.50575	0.0656802		60	0.4271	0.7803	0.5127	0.5687	0.4989	0.5878	0.5677	0.5917	0.4513	0.697	0.6572	0.4927	0.6698	0.609	0.6559	0.6222	0.6633	0.5612	0.5347	0.5179	0.5934	0.5294	0.5635	0.4566		60	0.4014	0.4482	0.5505	0.6262	0.5658	0.5678	0.4746	0.5877	0.5971	0.4749	0.6011	0.5576	0.4704	0.4699	0.4871	0.5783	0.3976	0.4662
0.571671	0.0816144	0.505471	0.0627208		61	0.4339	0.7769	0.5582	0.5784	0.4888	0.5435	0.5596	0.6101	0.4606	0.6836	0.6549	0.4999	0.6484	0.5851	0.6484	0.6124	0.6656	0.5452	0.5202	0.5312	0.5874	0.5153	0.5621	0.4504		61	0.4117	0.4515	0.538	0.6285	0.5361	0.573	0.4802	0.5861	0.5939	0.4847	0.6169	0.552	0.466	0.4577	0.4855	0.5642	0.4115	0.4578
0.570946	0.0844478	0.505958	0.0621824		62	0.4094	0.7954	0.5281	0.5702	0.4809	0.5459	0.5509	0.5826	0.4782	0.6621	0.6523	0.4866	0.6905	0.5992	0.6243	0.5977	0.6562	0.5694	0.5526	0.514	0.5997	0.5153	0.581	0.4602		62	0.4234	0.4538	0.5309	0.6362	0.5635	0.5641	0.4754	0.5744	0.5823	0.4759	0.6085	0.5411	0.4905	0.4665	0.4945	0.5822	0.4114	0.4532
0.562508	0.0776759	0.508837	0.0639186		63	0.4095	0.7443	0.5133	0.5539	0.4852	0.5715	0.5403	0.5884	0.4548	0.6715	0.6262	0.4818	0.638	0.5858	0.6244	0.6271	0.6633	0.5542	0.5308	0.5109	0.5614	0.5187	0.5738	0.4711		63	0.4142	0.4438	0.5426	0.6431	0.5937	0.5602	0.4801	0.5772	0.601	0.4701	0.5839	0.5519	0.497	0.4678	0.5083	0.5791	0.4207	0.4828
0.563462	0.0750182	0.506683	0.0625168		64	0.4247	0.7276	0.5197	0.5781	0.4937	0.5605	0.5369	0.583	0.4559	0.655	0.6369	0.4889	0.6312	0.5639	0.6438	0.6135	0.6638	0.5635	0.5161	0.498	0.6169	0.5033	0.5717	0.4765		64	0.4044	0.4618	0.5363	0.6398	0.5704	0.5939	0.4827	0.5729	0.6027	0.4738	0.5621	0.5541	0.474	0.4732	0.4862	0.5682	0.4205	0.4551
0.564925	0.0788676	0.506271	0.065501		65	0.3975	0.7191	0.5132	0.5508	0.5002	0.5646	0.5432	0.6043	0.4718	0.6661	0.6194	0.4858	0.6941	0.5753	0.6468	0.5965	0.6721	0.5473	0.5487	0.5033	0.5713	0.5243	0.5852	0.4573		65	0.4102	0.4483	0.5363	0.6505	0.573	0.5974	0.4554	0.5832	0.588	0.459	0.5826	0.5219	0.4812	0.4694	0.4898	0.5906	0.4122	0.4646
0.570925	0.0828806	0.508792	0.0623902		66	0.4226	0.7644	0.5631	0.5786	0.4815	0.542	0.5527	0.5936	0.454	0.6735	0.6604	0.4781	0.6564	0.5939	0.6496	0.626	0.663	0.5306	0.5502	0.5063	0.5734	0.5152	0.6097	0.4634		66	0.42	0.4434	0.5469	0.6278	0.5442	0.5881	0.4547	0.5903	0.6035	0.4817	0.5739	0.5393	0.4922	0.4686	0.499	0.6036	0.4099	0.4605
0.567246	0.0758796	0.511571	0.0670984		67	0.423	0.7125	0.5343	0.5613	0.4847	0.5478	0.5516	0.6086	0.4653	0.6569	0.6701	0.5011	0.6661	0.5857	0.654	0.6146	0.6692	0.5534	0.5321	0.5069	0.5529	0.5377	0.5587	0.4654		67	0.4104	0.4575	0.5582	0.6477	0.5821	0.5708	0.4688	0.576	0.6238	0.4731	0.6081	0.5488	0.4729	0.4682	0.5051	0.5858	0.4254	0.4655
0.566412	0.0836941	0.509387	0.0629212		68	0.3998	0.7446	0.5371	0.5818	0.4761	0.5612	0.5378	0.6357	0.4495	0.6751	0.6785	0.5001	0.6419	0.582	0.6413	0.6306	0.6556	0.5283	0.5128	0.5252	0.572	0.5331	0.5405	0.4533		68	0.4111	0.4568	0.5454	0.6478	0.5405	0.575	0.4656	0.5841	0.5977	0.4861	0.5874	0.5558	0.4979	0.458	0.5008	0.5888	0.4289	0.4761
0.566429	0.0794729	0.554146	0.138346		69	0.4214	0.7384	0.5351	0.5383	0.4888	0.561	0.5446	0.5805	0.4551	0.6585	0.6553	0.4878	0.6761	0.5827	0.6385	0.6027	0.6833	0.5604	0.5358	0.5042	0.5817	0.5371	0.5735	0.4535		69	0.4194	0.4604	0.533	0.6555	0.56	0.5819	0.4579	0.5774	0.9437	0.6806	0.9095	0.5609	0.4492	0.4734	0.5055	0.5629	0.4057	0.6089
0.560125	0.0783084	0.509404	0.0654136		70	0.4195	0.7454	0.5258	0.5503	0.482	0.5417	0.5507	0.575	0.4517	0.6773	0.6303	0.4928	0.6718	0.5707	0.6394	0.5866	0.6522	0.5344	0.5061	0.5167	0.5753	0.5222	0.5587	0.4664		70	0.4053	0.4527	0.5655	0.6617	0.5513	0.5857	0.4707	0.5689	0.5964	0.4682	0.595	0.5564	0.4764	0.4642	0.4993	0.5808	0.4373	0.4568
0.564562	0.0735826	0.510362	0.0638011		71	0.4166	0.7165	0.5529	0.5534	0.4846	0.5542	0.5652	0.6122	0.4636	0.6611	0.6338	0.4766	0.6148	0.6031	0.6349	0.5932	0.6701	0.5507	0.5415	0.5221	0.5825	0.5314	0.5666	0.4479		71	0.4095	0.4679	0.5377	0.6504	0.5704	0.5683	0.4692	0.5889	0.5947	0.4651	0.6009	0.5562	0.4785	0.4874	0.4983	0.5745	0.4172	0.4814
0.559779	0.0780403	0.508858	0.0631989		72	0.3933	0.7428	0.5182	0.5781	0.482	0.5498	0.5572	0.576	0.4654	0.6675	0.6333	0.4798	0.6366	0.5863	0.6151	0.6051	0.6694	0.5474	0.5326	0.4983	0.5571	0.5185	0.5541	0.4708		72	0.4101	0.4706	0.533	0.6316	0.5595	0.5841	0.476	0.5694	0.6124	0.491	0.6007	0.5592	0.4783	0.475	0.4843	0.5727	0.4013	0.4713
0.562579	0.0772304	0.5093	0.0656733		73	0.4312	0.7151	0.5431	0.537	0.4812	0.5549	0.5371	0.6003	0.4536	0.6752	0.6432	0.4854	0.6666	0.5682	0.6527	0.6151	0.6629	0.531	0.5317	0.4981	0.5635	0.521	0.5719	0.4619		73	0.4108	0.4621	0.5428	0.6557	0.5738	0.5804	0.468	0.5776	0.6144	0.4823	0.5888	0.5553	0.468	0.4805	0.4954	0.5499	0.4105	0.4655
0.561104	0.0827318	0.510379	0.0674922		74	0.4213	0.7404	0.5366	0.5507	0.4699	0.5647	0.5637	0.5866	0.4616	0.6745	0.6186	0.4678	0.6734	0.5738	0.6284	0.6107	0.6783	0.5681	0.4813	0.4853	0.5777	0.5158	0.571	0.4463		74	0.4215	0.455	0.5415	0.64	0.5727	0.5884	0.4703	0.5937	0.6209	0.4817	0.5997	0.559	0.478	0.4391	0.5077	0.5708	0.4015	0.4603
0.556138	0.0812583	0.510188	0.064747		75	0.4218	0.7379	0.5037	0.5366	0.4752	0.54	0.5447	0.5872	0.4604	0.6763	0.6306	0.4713	0.658	0.5796	0.6395	0.6081	0.6675	0.5208	0.4986	0.5136	0.5376	0.5169	0.5741	0.4473		75	0.4212	0.4493	0.5271	0.6409	0.5435	0.5742	0.4669	0.6001	0.6126	0.4965	0.6112	0.5582	0.4814	0.4722	0.489	0.5732	0.4237	0.4715
0.553375	0.0725583	0.512013	0.0614953		76	0.3956	0.7031	0.5144	0.5504	0.4917	0.5261	0.5772	0.5873	0.4694	0.6362	0.6117	0.471	0.6429	0.5699	0.6289	0.5967	0.6564	0.5492	0.5049	0.4901	0.5658	0.5066	0.5633	0.4722		76	0.4096	0.4965	0.5497	0.6438	0.5666	0.5561	0.4752	0.5615	0.6039	0.482	0.5991	0.5737	0.4915	0.4788	0.481	0.5786	0.4215	0.4719
0.553367	0.0783969	0.510637	0.0663203		77	0.3951	0.7323	0.5265	0.5366	0.4599	0.5631	0.5524	0.588	0.4721	0.6468	0.6154	0.4645	0.6552	0.5474	0.6257	0.6136	0.6489	0.5639	0.5034	0.4811	0.5513	0.5268	0.5536	0.4572		77	0.4075	0.4633	0.537	0.65	0.5696	0.581	0.4798	0.5779	0.598	0.4864	0.6114	0.5579	0.4673	0.4703	0.4919	0.5919	0.4213	0.4628
0.555237	0.0761821	0.512679	0.0655987		78	0.3951	0.7215	0.4994	0.5444	0.4713	0.5633	0.544	0.5838	0.4676	0.6302	0.6387	0.4749	0.6575	0.5628	0.6242	0.5987	0.6496	0.5564	0.5225	0.4869	0.5817	0.5148	0.5697	0.4667		78	0.4262	0.4598	0.5404	0.6448	0.5789	0.6124	0.4856	0.5718	0.6032	0.4754	0.6009	0.5584	0.4641	0.4957	0.4971	0.5774	0.4231	0.478
0.559567	0.0828029	0.513492	0.0669902		79	0.4069	0.7802	0.5253	0.5436	0.4919	0.5235	0.547	0.5913	0.4504	0.6522	0.6229	0.4833	0.6355	0.5606	0.6324	0.6061	0.6483	0.5419	0.5093	0.4948	0.642	0.513	0.5664	0.4608		79	0.4151	0.4779	0.5321	0.6623	0.5729	0.5669	0.4868	0.5826	0.618	0.4876	0.608	0.5663	0.5143	0.4648	0.4939	0.5747	0.4153	0.4579
0.560421	0.0855606	0.50645	0.0669662		80	0.394	0.7734	0.5106	0.5352	0.4924	0.5247	0.5312	0.5777	0.4598	0.6826	0.6613	0.5058	0.6253	0.5958	0.6329	0.6003	0.6489	0.5249	0.5066	0.4887	0.6374	0.5219	0.5587	0.46		80	0.4058	0.4566	0.5391	0.6256	0.568	0.6015	0.4666	0.603	0.5994	0.4658	0.6014	0.5498	0.4745	0.4471	0.4847	0.5684	0.4082	0.4681
0.571629	0.0931006	0.507112	0.06551		81	0.4047	0.7886	0.541	0.5511	0.4961	0.5252	0.5424	0.5716	0.4414	0.6386	0.7606	0.5451	0.6844	0.5634	0.641	0.5932	0.6713	0.5351	0.5244	0.5065	0.6518	0.5149	0.5594	0.4673		81	0.4086	0.4531	0.5431	0.6471	0.5784	0.5758	0.487	0.5669	0.6153	0.4838	0.5864	0.5506	0.4755	0.4517	0.4822	0.5655	0.4155	0.4591
0.585183	0.100125	0.508046	0.0689714		82	0.4313	0.8461	0.5611	0.5594	0.5009	0.546	0.5496	0.5708	0.4581	0.6188	0.7975	0.5888	0.6476	0.5701	0.6537	0.6345	0.6567	0.5525	0.5058	0.5239	0.7235	0.5246	0.556	0.4671		82	0.415	0.4595	0.5519	0.6355	0.5598	0.6017	0.4837	0.6021	0.6025	0.4726	0.6039	0.5516	0.4774	0.4555	0.477	0.5934	0.4156	0.4701
0.610825	0.133194	0.508929	0.0661626		83	0.4286	0.9376	0.5793	0.6602	0.5328	0.5439	0.5223	0.5703	0.461	0.7153	0.978	0.6439	0.6275	0.5737	0.6642	0.6079	0.6296	0.5325	0.5477	0.6053	0.7706	0.5078	0.5533	0.4665		83	0.4201	0.4757	0.5328	0.6349	0.5496	0.6104	0.4771	0.583	0.6059	0.4856	0.5989	0.5488	0.4915	0.4679	0.4964	0.5879	0.4065	0.4708
0.650942	0.169574	0.50885	0.0642407		84	0.4608	1.1915	0.5852	0.6699	0.6616	0.5825	0.5379	0.5593	0.4594	0.7461	1.0267	0.7138	0.6313	0.6203	0.7404	0.6137	0.6771	0.5505	0.631	0.6212	0.8156	0.516	0.5279	0.4829		84	0.4156	0.4737	0.5493	0.6406	0.6003	0.5714	0.491	0.5798	0.6087	0.4678	0.5687	0.5475	0.4574	0.4937	0.4792	0.5845	0.4252	0.4612
0.675813	0.185492	0.504858	0.0622437		85	0.524	1.2554	0.6401	0.698	0.6686	0.613	0.5325	0.601	0.4426	0.8477	1.0557	0.7645	0.6465	0.6229	0.8463	0.5972	0.6835	0.5396	0.6613	0.6335	0.8078	0.5158	0.5723	0.4497		85	0.4054	0.4729	0.5434	0.6119	0.562	0.5944	0.4697	0.5723	0.5992	0.4814	0.5778	0.5385	0.4934	0.4922	0.466	0.5782	0.4083	0.4696
0.721092	0.204593	0.512529	0.0694124		86	0.6605	1.3107	0.6611	0.7438	0.7446	0.693	0.5586	0.6053	0.4443	0.9779	1.0735	0.7221	0.712	0.6459	1.0192	0.6102	0.8184	0.5622	0.708	0.6465	0.8505	0.5176	0.5597	0.4606		86	0.4155	0.4785	0.5419	0.6699	0.5647	0.6031	0.4711	0.5893	0.6281	0.4835	0.5746	0.5571	0.4845	0.4609	0.4667	0.5852	0.4202	0.4689
0.748554	0.228371	0.508842	0.0694779		87	0.6824	1.4446	0.7974	0.7422	0.7652	0.7469	0.5854	0.5974	0.4427	1.0325	1.1122	0.7243	0.6718	0.7119	1.0213	0.739	0.8905	0.5355	0.7062	0.6892	0.8295	0.4988	0.5523	0.4461		87	0.4042	0.4709	0.5424	0.6512	0.5766	0.5761	0.4648	0.5906	0.6014	0.4607	0.6057	0.5596	0.4767	0.4603	0.4788	0.5944	0.4247	0.4594
0.785771	0.25271	0.5081	0.0669422		88	0.725	1.5077	0.7801	0.7475	0.7274	0.8976	0.6606	0.6115	0.4497	1.1685	1.1541	0.7734	0.7154	0.7254	1.1166	0.8024	0.9997	0.5644	0.7235	0.664	0.8443	0.4839	0.5553	0.4605		88	0.4133	0.483	0.5352	0.6375	0.5623	0.595	0.47	0.5824	0.6216	0.4744	0.5901	0.5556	0.4916	0.4572	0.4616	0.5835	0.4072	0.4718
0.815304	0.245745	0.507129	0.0714958		89	0.7048	1.4793	0.8572	0.8089	0.8117	0.9138	0.7547	0.6231	0.4455	1.1438	1.1215	0.7407	0.7688	0.6979	1.2086	0.903	0.9463	0.715	0.8151	0.697	0.9162	0.4892	0.5664	0.4388		89	0.4013	0.465	0.5304	0.6621	0.571	0.5935	0.4578	0.5885	0.6045	0.4816	0.5825	0.5707	0.4745	0.4697	0.4814	0.5902	0.4028	0.473
0.845221	0.239375	0.509429	0.0650079		90	0.7879	1.4579	0.7981	0.8178	0.7667	1.0009	0.8455	0.6815	0.4506	1.1563	1.1396	0.7384	0.7427	0.8664	1.083	0.9774	1.0161	0.8005	0.9255	0.7221	1.0128	0.522	0.5244	0.4512		90	0.4068	0.4654	0.5473	0.6325	0.5705	0.5927	0.4904	0.5603	0.6186	0.4716	0.5909	0.5529	0.5177	0.4581	0.481	0.5773	0.4098	0.4489
0.842058	0.225402	0.505967	0.0666161		91	0.7332	1.3858	0.845	0.8492	0.7981	0.944	0.8577	0.7373	0.4508	1.0593	1.0274	0.8081	0.7816	0.757	1.2037	1.0487	1.0604	0.8271	0.8826	0.8148	0.8551	0.4962	0.5363	0.45		91	0.4112	0.4572	0.5371	0.6437	0.575	0.5728	0.4823	0.5684	0.6107	0.4646	0.6059	0.5503	0.4645	0.4647	0.4762	0.584	0.404	0.4734
0.870283	0.228166	0.506663	0.0599061		92	0.8465	1.3892	0.8368	0.8489	0.7981	1.0063	0.9045	0.7427	0.5145	1.1637	1.0115	0.8408	0.8257	0.9181	1.1155	1.158	1.1508	0.7864	0.8428	0.7935	0.883	0.5161	0.5559	0.4375		92	0.406	0.4522	0.5261	0.6213	0.5754	0.5676	0.4899	0.5691	0.5971	0.4791	0.6038	0.5637	0.4854	0.4618	0.499	0.5452	0.4304	0.4612
0.8845	0.206124	0.504838	0.0703439		93	0.7402	1.198	0.8526	0.922	0.9135	1.038	0.8807	0.893	0.611	1.1205	1.0973	0.854	0.9916	0.8516	1.1865	1.1306	1.039	0.8418	0.817	0.7873	0.9572	0.5041	0.5511	0.4494		93	0.4018	0.4589	0.5199	0.665	0.5581	0.5906	0.47	0.5832	0.6047	0.4513	0.603	0.5575	0.4729	0.4647	0.5041	0.5699	0.4053	0.4618
0.910221	0.213988	0.507396	0.0630221		94	0.83	1.3797	0.816	0.8971	0.9031	1.0117	0.9133	1.0628	0.6362	1.1411	1.0208	0.8761	1.0143	0.8816	1.1945	1.0656	1.1001	0.9321	0.9037	0.7366	0.9592	0.5241	0.5814	0.4642		94	0.4079	0.4653	0.5283	0.6299	0.5626	0.5733	0.4862	0.5653	0.6025	0.4669	0.5944	0.5488	0.4498	0.4727	0.5475	0.5889	0.4265	0.4716
0.920992	0.202989	0.508712	0.0621789		95	0.8439	1.3414	0.8737	0.946	0.7955	0.9366	0.9483	1.1756	0.6523	1.1981	1.029	0.8396	1.0484	0.8703	1.1917	1.0734	1.0108	0.9255	0.9525	0.7856	0.9389	0.598	0.6404	0.4883		95	0.3957	0.4459	0.5384	0.6314	0.564	0.5617	0.4787	0.546	0.6123	0.4645	0.59	0.5407	0.4956	0.4707	0.5371	0.5794	0.4041	0.4583
0.947017	0.186491	0.506117	0.0674022		96	0.7899	1.3669	0.8444	0.9463	0.8766	1.0002	0.8948	1.0816	0.6922	1.1925	1.0725	0.8905	1.0116	0.8602	1.0992	1.0838	1.1971	0.9182	1.1167	0.8325	0.9071	0.7675	0.7812	0.5049		96	0.3954	0.4506	0.5188	0.6362	0.578	0.5701	0.4648	0.5586	0.608	0.4633	0.5872	0.5718	0.4468	0.4643	0.5602	0.5726	0.3989	0.4578
0.947404	0.17331	0.504287	0.0620348		97	0.7929	1.2783	0.9089	0.9342	0.8578	1.0038	1.0237	1.0921	0.7106	1.2282	1.0892	0.8106	1.0477	0.9723	1.1591	1.0213	1.1222	0.8179	1.0245	0.8514	0.863	0.7724	0.8148	0.5408		97	0.4039	0.4611	0.524	0.6053	0.5704	0.557	0.4623	0.5634	0.6026	0.4704	0.5902	0.5449	0.4674	0.4693	0.5742	0.5556	0.4204	0.4302
0.9904	0.199909	0.504021	0.0709598		98	0.7681	1.5046	0.9538	1.0157	0.8994	0.977	0.9952	1.2001	0.731	1.1796	1.1014	0.8559	1.2471	0.944	1.2557	1.1824	1.09	0.9038	0.9256	0.8429	0.83	0.88	0.882	0.6043		98	0.3881	0.4497	0.5151	0.612	0.5504	0.5628	0.4619	0.5571	0.6036	0.4595	0.6042	0.5589	0.4501	0.4436	0.5978	0.5439	0.3861	0.4421
0.978954	0.166014	0.507429	0.0606128		99	0.7292	1.2928	0.8996	0.9158	0.9467	0.9864	1.0644	1.1449	0.7367	1.2044	1.0725	0.8931	1.1856	0.9088	1.1844	1.0381	1.1265	0.8659	1.0684	0.9842	0.8446	0.8556	0.9269	0.6194		99	0.4117	0.4503	0.5038	0.6338	0.564	0.5265	0.4671	0.565	0.5945	0.4614	0.5876	0.5509	0.4671	0.4841	0.5751	0.5626	0.4073	0.4533
0.980508	0.171696	0.510383	0.065018		100	0.8003	1.4059	0.9281	0.9915	0.9057	0.9689	1.0275	1.1249	0.7318	1.2854	0.9715	0.8747	1.1303	0.8897	1.2047	1.1897	1.0554	0.8867	0.948	0.9056	0.7573	0.8985	0.915	0.7351		100	0.4067	0.4607	0.5066	0.6265	0.5493	0.5734	0.4464	0.573	0.6009	0.4484	0.5851	0.5369	0.4747	0.4988	0.5861	0.5649	0.4031	0.453
0.968796	0.152318	0.512938	0.0703108		101	0.7528	1.2764	0.9467	0.9324	0.9446	0.9717	0.9784	1.1641	0.7433	1.2232	1.0727	0.8112	1.0603	0.9101	1.1149	1.1274	1.1063	0.841	0.987	0.8648	0.9131	0.9344	0.9001	0.6742		101	0.3928	0.446	0.5131	0.6121	0.5564	0.5707	0.4674	0.5417	0.5678	0.4531	0.5817	0.5342	0.4735	0.4888	0.6465	0.5995	0.3981	0.4533
1.0002	0.180475	0.518129	0.0751541		102	0.7657	1.487	0.8907	1.0549	0.9355	0.966	0.9932	1.1447	0.817	1.3464	0.9676	0.9005	1.1793	0.8908	1.2197	1.1419	1.0694	0.8494	0.995	0.8652	0.8524	0.9996	0.931	0.7418		102	0.39	0.4534	0.5181	0.6474	0.542	0.564	0.443	0.5823	0.5863	0.4782	0.5928	0.5458	0.4656	0.5476	0.6573	0.5378	0.3964	0.4506
0.9922	0.151459	0.521121	0.0798302		103	0.7687	1.3951	0.9569	0.9916	0.8916	1.0575	0.9912	1.1332	0.8219	1.1999	1.0606	0.8231	1.169	0.971	1.0402	1.1077	1.034	0.8512	1.1312	0.9009	0.9106	0.8967	0.9642	0.7448		103	0.3973	0.4395	0.5058	0.5841	0.5538	0.5644	0.472	0.556	0.5833	0.4567	0.585	0.5273	0.479	0.509	0.6968	0.5544	0.407	0.4419
1.02157	0.166883	0.521563	0.0791025		104	0.7517	1.4196	0.999	1.0218	0.9449	1.1107	0.9874	1.2427	0.8398	1.199	1.0551	0.8515	1.1999	0.9733	1.1771	1.2685	1.0548	0.9	1.0276	0.9228	0.8271	0.9086	1.0459	0.7888		104	0.4052	0.4493	0.5375	0.6026	0.5364	0.5482	0.4664	0.5653	0.5774	0.4795	0.5671	0.5353	0.4842	0.474	0.7451	0.5529	0.4168	0.4441
1.00173	0.126154	0.5253	0.0784987		105	0.823	1.3148	0.9278	0.9297	0.9631	1.0322	1.1006	1.1113	0.8641	1.1854	0.9923	0.8596	1.1695	1.0308	1.0937	1.084	1.1311	0.8697	0.9664	0.9205	0.9321	0.9974	0.9107	0.8318		105	0.4127	0.4491	0.5017	0.6047	0.5479	0.5438	0.4607	0.5479	0.5867	0.5242	0.5568	0.5376	0.4772	0.4921	0.7431	0.595	0.4097	0.4479
1.01058	0.162624	0.538379	0.0940179		106	0.7864	1.508	0.9347	0.9919	0.9691	0.9763	1.0405	1.1348	0.9281	1.1109	1.1033	0.8731	1.0814	0.9328	1.0966	1.1034	1.1966	0.761	1.1065	0.8867	0.8189	1.0555	1.0704	0.7869		106	0.4089	0.4418	0.509	0.6048	0.5315	0.5518	0.4629	0.5883	0.5984	0.5312	0.584	0.5339	0.5194	0.4926	0.7883	0.598	0.3952	0.4518
0.999837	0.151855	0.543042	0.0893716		107	0.8627	1.3252	0.9408	0.9527	0.8795	0.9146	1.0975	1.0898	0.8548	1.2994	1.0434	0.792	1.2911	0.9875	1.0728	0.9937	1.1027	0.8213	1.057	0.9217	0.8661	1.0782	0.9382	0.8134		107	0.4195	0.4523	0.5476	0.5892	0.5746	0.5284	0.459	0.6173	0.5654	0.503	0.564	0.5354	0.5448	0.5108	0.7916	0.6065	0.4021	0.4748
1.00955	0.147666	0.549038	0.0987759		108	0.7613	1.2972	0.8865	0.9507	0.9432	0.9084	1.0066	1.1089	0.9387	1.2461	1.0234	0.8572	1.3295	0.9509	1.1086	0.9951	1.1814	0.9088	1.0545	0.9073	0.8413	1.1469	0.9849	0.8917		108	0.4077	0.4491	0.5855	0.6003	0.5463	0.5589	0.4473	0.5883	0.5719	0.5353	0.5761	0.53	0.5315	0.5777	0.82	0.6134	0.4178	0.4404
1.0123	0.136439	0.557821	0.107248		109	0.8153	1.258	0.8667	0.9498	0.9485	1.0523	1.0158	1.1864	0.8849	1.2217	0.9566	0.8647	1.3023	1.0059	1.136	1.0474	1.0472	0.844	1.0395	0.9131	0.8492	1.1166	1.0273	0.9459		109	0.3977	0.4403	0.6781	0.6175	0.5664	0.5356	0.4374	0.5934	0.6013	0.5184	0.5764	0.5253	0.5654	0.5716	0.8148	0.6015	0.4221	0.4479
1.01983	0.144422	0.563575	0.102208		110	0.861	1.4012	0.9618	0.93	0.9711	1.0867	1.0272	1.127	0.9244	1.2713	0.9969	0.84	1.2311	1.0439	1.1232	1.006	1.0597	0.8811	1.1068	0.8474	0.8737	1.0611	1.0151	0.8282		110	0.4084	0.4417	0.7494	0.6339	0.5372	0.549	0.4345	0.6186	0.6056	0.5709	0.5722	0.5442	0.5339	0.5788	0.7678	0.6612	0.4177	0.4859
1.00733	0.127988	0.580508	0.105611		111	0.7709	1.2046	0.9397	0.9392	0.9037	0.9839	1.0021	1.2003	0.9363	1.2831	1.0046	0.8756	1.1691	1.0408	1.0409	1.0331	1.1737	0.9105	1.0817	0.8976	0.8284	1.0588	0.9641	0.9333		111	0.4323	0.4617	0.808	0.6251	0.5227	0.5559	0.4468	0.6276	0.6165	0.5571	0.5674	0.5442	0.5646	0.5891	0.8134	0.6771	0.4829	0.4867
1.0013	0.129978	0.585954	0.109424		112	0.7631	1.2264	0.974	0.9462	0.9912	0.9468	1.0131	1.1271	0.8942	1.2003	1.001	0.8719	1.2679	0.9425	1.1115	1.0486	1.1076	0.8912	1.0165	0.8947	0.8524	1.131	0.9747	0.8373		112	0.4296	0.4681	0.7712	0.6693	0.5347	0.5563	0.4697	0.6348	0.6393	0.5189	0.5801	0.5487	0.6039	0.6011	0.8388	0.7213	0.4315	0.5033
1.01736	0.116904	0.602217	0.121091		113	0.8012	1.1451	1.0196	0.8954	0.988	0.9935	1.0384	1.1128	1.014	1.2496	1.0746	0.9679	1.2624	1.05	1.1182	1.0472	1.0576	0.9178	1.0394	0.9042	0.855	1.0558	0.9924	0.8166		113	0.4395	0.4757	0.7408	0.6621	0.5768	0.5828	0.4434	0.6263	0.6289	0.5943	0.5989	0.5416	0.5728	0.6264	0.8865	0.6826	0.4477	0.5519
1.01431	0.130025	0.609563	0.120752		114	0.8431	1.1896	0.9576	1.0094	1.0186	0.9762	1.0103	1.0759	0.8734	1.3079	1.0898	0.9549	1.2414	1.0384	1.0041	1.04	1.1129	0.8503	1.0797	0.8408	0.7897	1.0756	1.0933	0.8706		114	0.4063	0.4825	0.7744	0.6466	0.5601	0.5905	0.4468	0.6731	0.6834	0.5722	0.606	0.5548	0.5766	0.6262	0.8848	0.7414	0.4556	0.4952
1.02123	0.146617	0.615342	0.112281		115	0.8262	1.1079	0.8684	0.8984	0.9577	0.9653	1.0203	1.1924	0.9545	1.3659	1.1291	0.9304	1.3114	1.0023	1.1392	1.0968	1.1844	0.9312	1.0484	0.8953	0.8324	1.0563	0.9606	0.8348		115	0.4154	0.5028	0.6795	0.6879	0.5716	0.5754	0.4674	0.7018	0.6651	0.6014	0.6241	0.5646	0.5581	0.6839	0.8962	0.7345	0.4612	0.5451
1.01795	0.129829	0.629467	0.122052		116	0.7691	1.1517	0.8819	0.9319	0.9533	0.9949	1.0175	1.1997	0.947	1.2846	1.1203	0.911	1.1333	1.1095	1.0806	1.0874	1.0781	0.9584	1.1076	0.8854	0.8058	1.1136	1.0556	0.8525		116	0.4269	0.4901	0.645	0.6886	0.61	0.5729	0.4743	0.796	0.6964	0.6314	0.6419	0.5784	0.5987	0.6279	0.8719	0.8486	0.4621	0.5374
1.0244	0.146043	0.642825	0.115378		117	0.8005	1.2217	0.9396	0.9763	0.9659	0.9088	1.0093	1.0569	0.9206	1.2688	1.1998	0.9275	1.315	0.9618	1.1887	1.128	1.1669	0.8853	1.0734	0.888	0.7877	1.1086	0.9533	0.9331		117	0.431	0.4661	0.6819	0.7152	0.5988	0.5745	0.4874	0.7794	0.7338	0.6364	0.6957	0.6226	0.6311	0.6625	0.8489	0.7466	0.4985	0.5317
1.0126	0.131707	0.675433	0.132603		118	0.7068	1.1111	1.0694	0.9366	0.9827	1.0376	1.0766	1.1761	0.9379	1.2664	1.1059	0.9686	1.1757	1.0034	1.0843	1.1444	1.0091	0.9291	1.0201	0.8345	0.7956	1.0309	1.0733	0.8263		118	0.4334	0.4959	0.679	0.7056	0.6995	0.5573	0.4813	0.8582	0.8118	0.6805	0.6815	0.6037	0.702	0.7	0.8596	0.9038	0.5113	0.507
1.01568	0.159122	0.6844	0.133065		119	0.7388	1.0303	0.8438	0.9157	0.9368	0.9516	1.0531	1.1613	0.9194	1.2456	1.1461	0.9762	1.329	0.986	1.2592	1.0173	1.0484	0.8553	1.0344	0.8858	0.8148	1.0362	1.3151	0.876		119	0.4439	0.4903	0.7104	0.7917	0.6419	0.5642	0.5017	0.9491	0.7537	0.7248	0.7283	0.5821	0.7092	0.7111	0.8635	0.9113	0.561	0.5305
1.02133	0.148675	0.708771	0.151407		120	0.7316	1.0998	0.983	0.8851	0.9772	1.0094	1.0047	1.2164	0.9323	1.2215	1.0653	0.902	1.2811	0.9926	1.0757	1.1471	1.1434	0.9489	1.0646	0.8488	0.7508	1.1037	1.2523	0.8747		120	0.4727	0.5349	0.7921	0.8121	0.6424	0.5802	0.4931	1.1171	0.7558	0.7016	0.687	0.5876	0.701	0.6632	0.8523	0.93	0.539	0.584
1.00575	0.126349	0.735083	0.154856		121	0.6975	1.0797	0.9362	0.8909	1.0012	1.0033	1.1424	0.9884	0.9524	1.2358	1.1117	0.962	1.1219	0.9883	1.1167	1.1091	1.1573	0.8889	1.0681	0.8198	0.8591	0.9953	1.1227	0.8892		121	0.4873	0.516	0.8105	0.784	0.6601	0.6081	0.4905	1.0605	0.8179	0.6762	0.7943	0.5923	0.735	0.6963	0.8777	0.9656	0.5636	0.6111
1.00037	0.143948	0.753283	0.165828		122	0.677	1.0573	0.8904	0.8375	1.0466	1.0044	0.9774	1.0434	0.9869	1.3031	1.2137	0.9292	1.2238	1.034	1.0708	1.0618	1.074	0.8807	0.9632	0.8217	0.8717	1.0046	1.1809	0.8547		122	0.4801	0.5587	0.798	0.8957	0.6852	0.6308	0.5109	1.1742	0.8223	0.7243	0.8453	0.6328	0.7948	0.6864	0.9708	0.9237	0.5746	0.5768
1.03217	0.162926	0.770083	0.161259		123	0.6742	1.1258	0.8552	0.8233	1.0003	0.9616	1.155	1.2509	0.9319	1.3358	1.166	0.9333	1.2616	0.9995	1.1243	1.1525	1.1996	0.9711	1.0062	0.8718	0.8394	1.1294	1.0926	0.9108		123	0.5007	0.5612	0.8721	0.953	0.6589	0.6641	0.5295	1.086	0.9704	0.8246	0.6562	0.6412	0.7697	0.7438	0.9852	0.9207	0.572	0.6206
1.01678	0.146177	0.761529	0.150357		124	0.7217	1.1024	0.9115	0.7977	1.0375	0.9482	1.0057	1.0578	0.8886	1.1238	1.1485	0.9712	1.1409	1.0305	1.1399	1.2006	1.1722	0.9667	1.1164	0.7611	0.8457	1.0831	1.2945	0.9366		124	0.5137	0.5752	0.855	0.8883	0.6378	0.6569	0.5568	1.0737	0.9143	0.7682	0.6662	0.6682	0.794	0.7089	1.016	0.8893	0.6163	0.6034
1.01356	0.128176	0.791546	0.146664		125	0.71	1.0668	0.9756	0.8683	1.0425	0.9524	1.0101	1.0807	0.9135	1.2409	1.1098	0.8917	1.1953	0.9948	1.0636	1.0291	1.2128	0.9272	1.0703	0.8703	0.8551	1.1041	1.1669	0.9736		125	0.5459	0.6332	0.8148	0.9722	0.6479	0.6778	0.6047	1.1774	0.8324	0.7934	0.7244	0.751	0.7223	0.7316	0.9849	0.9286	0.6643	0.6436
1.00328	0.147038	0.808567	0.152498		126	0.7094	1.0593	0.8624	0.9099	0.9541	0.9547	0.9554	1.0545	0.8648	1.3226	1.2138	0.9478	1.2149	0.9787	1.0481	1.0656	1.2019	0.9584	1.0046	0.8151	0.828	1.1061	1.148	0.9005		126	0.55	0.6658	0.8285	0.9511	0.6648	0.6683	0.6264	1.2369	0.8893	0.7933	0.7608	0.7986	0.7545	0.7377	0.9813	1.0193	0.6565	0.6674
1.01837	0.160921	0.821987	0.147005		127	0.685	1.0901	0.8527	0.8618	1.0133	0.8956	0.9461	1.0587	0.9874	1.2181	1.2097	0.9695	1.3356	0.9773	0.996	0.9864	1.1864	0.9885	0.9813	0.8914	0.8121	1.2667	1.2768	0.9544		127	0.5468	0.6543	0.8537	0.9628	0.7421	0.7025	0.6421	1.2122	0.8754	0.8419	0.7132	0.805	0.7419	0.7944	0.9472	1.0463	0.6953	0.6581
1.0043	0.15468	0.837833	0.145416		128	0.682	1.0581	0.8889	0.8722	0.9708	0.9277	0.9452	0.9836	0.954	1.2429	1.152	0.9293	1.2994	0.9939	1.0931	1.1022	1.3155	0.982	0.929	0.7718	0.8263	1.092	1.1178	0.9734		128	0.5819	0.6899	0.86	0.8957	0.7978	0.8013	0.6694	1.2344	0.8733	0.8898	0.7799	0.8022	0.7664	0.7557	1.0261	1.0613	0.7188	0.6594
0.999129	0.150635	0.85375	0.150736		129	0.7261	1.0297	0.8585	0.8135	1.022	0.8369	0.9831	0.9948	0.9077	1.288	1.1562	1.0218	1.2983	1.0082	0.9855	1.0197	1.2198	1.0561	1.0641	0.8566	0.7918	1.0783	1.1067	0.8557		129	0.5868	0.6853	0.8116	0.8858	0.8665	0.814	0.6871	1.3575	0.911	0.9904	0.8472	0.8141	0.8163	0.7877	0.9932	1.0517	0.7314	0.7524
0.991971	0.134805	0.868029	0.140356		130	0.6627	1.0088	0.892	0.798	0.9894	0.8814	0.9777	1.0335	0.9636	1.2383	1.1276	0.9488	1.1124	0.9571	0.959	1.0104	1.1623	0.939	1.0317	0.8302	0.8836	1.1799	1.194	1.0259		130	0.5645	0.7566	0.8971	0.9391	0.8313	0.8249	0.7279	1.1443	0.852	1.0938	0.7977	0.8608	0.7154	0.7995	1.1275	1.0511	0.7786	0.766
0.975167	0.148228	0.887846	0.131727		131	0.6126	0.9316	0.9098	0.8038	0.9579	0.8174	0.9098	0.9524	0.9144	1.2183	1.1371	0.9026	1.2812	0.9493	0.9392	0.9887	1.2233	1.0488	1.0419	0.8467	0.9084	1.064	1.1046	0.9402		131	0.6199	0.7704	0.9592	0.9394	0.908	0.9234	0.7188	1.1981	0.9207	0.9619	0.8576	0.8197	0.7337	0.843	0.996	1.042	0.7388	0.7304
0.978521	0.162728	0.894554	0.126636		132	0.6099	0.898	0.8597	0.8497	0.8987	0.8935	0.9007	0.9059	0.8693	1.267	1.2238	0.9618	1.2629	0.9657	0.972	0.9566	1.1634	1.0697	0.9739	0.8789	0.7624	1.1883	1.1525	1.0002		132	0.6057	0.7268	0.9171	0.9912	0.9512	0.9599	0.7355	1.1882	0.9523	0.9566	0.9022	0.8856	0.7707	0.8482	0.985	1.045	0.8132	0.7616
0.968642	0.146702	0.909537	0.131415		133	0.6288	0.9974	0.8653	0.8855	0.9591	0.7661	0.8593	0.9302	0.9305	1.1807	1.1716	0.9843	1.122	1.0183	0.9472	0.9651	1.132	1.0039	0.9855	0.7981	0.8009	1.0978	1.2682	0.9496		133	0.6516	0.7469	1.0138	0.9749	1.0088	1.094	0.8507	1.1477	0.8851	0.9249	0.972	0.8798	0.7696	0.8806	1.1219	1.105	0.7852	0.8069
0.961733	0.143443	0.916742	0.133815		134	0.7062	1.0034	0.8762	0.808	0.9716	0.788	0.9664	0.9287	0.9519	1.2261	1.0674	0.9203	1.1575	0.9474	0.9301	0.899	1.2707	0.933	0.8669	0.8369	0.7973	1.1073	1.1808	0.9405		134	0.635	0.7584	0.9108	0.9989	1.0028	1.1459	0.8238	1.1285	0.9535	0.9968	0.888	0.9222	0.8141	0.8811	1.0564	1.0971	0.8071	0.8142
0.969354	0.147189	0.930625	0.129046		135	0.6993	1.0255	0.8495	0.9757	0.914	0.786	0.9384	0.8766	0.9529	1.2426	1.2054	0.9472	1.2264	0.9524	0.8878	0.9388	1.1455	1.0425	0.8647	0.7921	0.8167	1.1547	1.1041	0.9257		135	0.6582	0.7526	1.0524	1.0455	0.9551	1.0111	0.9298	1.1102	0.9862	0.9716	0.9659	0.8848	0.7732	0.8769	1.0936	1.1519	0.8152	0.8184
0.960612	0.151938	0.946854	0.131096		136	0.6199	0.9652	0.9505	0.942	0.9236	0.807	0.9278	0.8822	0.8636	1.2751	1.133	0.9194	1.078	0.909	0.9703	0.8802	1.1967	0.9395	0.8578	0.8573	0.8217	1.1681	1.2408	0.926		136	0.6217	0.7815	1.092	1.141	0.9867	1.0383	0.9309	1.1401	1.0291	0.9177	0.969	0.9497	0.895	0.932	1.0845	1.0765	0.7981	0.8555
0.967358	0.148256	0.950275	0.138828		137	0.6617	0.9991	0.8468	0.8752	0.9966	0.7927	0.969	0.8881	0.9618	1.241	1.1657	0.861	1.2636	0.9975	0.9398	0.9304	1.1566	0.9124	0.8851	0.8022	0.9276	1.0969	1.1583	0.8875		137	0.6491	0.7605	1.1643	1.1609	1.0463	1.1088	1.0112	1.1712	1.0457	0.8913	0.8705	0.9409	0.8392	0.962	0.958	1.1247	0.8248	0.8972
0.946287	0.127054	0.951158	0.146375		138	0.7107	0.987	0.8396	0.9239	0.9404	0.8223	0.8607	0.8934	0.9003	1.236	1.0771	0.8515	1.161	0.9672	0.9028	0.8689	1.0476	0.9784	0.8648	0.8895	0.8589	1.1591	1.1135	0.8563		138	0.6125	0.8241	1.0888	1.1645	1.1029	1.0675	0.9606	1.0873	1.0978	0.9126	0.9636	0.9416	0.8285	0.8497	1.108	1.049	0.7293	0.9168
0.957583	0.151483	0.96165	0.150087		139	0.6625	1.0659	0.8627	0.8231	0.9296	0.7882	0.9053	0.9276	0.9512	1.2665	1.1198	0.8797	1.2021	1.0312	0.8782	0.8919	1.1839	0.8837	0.9546	0.7766	0.8475	1.073	1.1748	0.9024		139	0.6465	0.7716	1.0568	1.1348	1.2455	1.18	0.9652	1.0903	1.0639	0.9832	0.9812	0.9944	0.7977	0.9041	1.0256	1.1172	0.7569	0.8338
[truncated: 6 more columns]
