# Supplementary material for: Hypoxia controls plasma membrane targeting of polarity proteins by dynamic turnover of PI4P and PI(4,5)P2
Source: eLife. 2022 Jun 9;11:e79582. doi: 10.7554/eLife.79582 (PMC9242647; doi:10.7554/eLife.79582)
Supplement: Figure 3—source data 1. [file elife-79582-fig3-data1.xlsx]

## Sheet: Figure 3A-P4MX2
Figure 3 Souce Data 1
						1	2	3	4	5	6	7	8	9	10			1	2	3	4	5
WT		RNAi			WT												RNAi
AVG	STDEV	AVG	STDEV
C2_PM/Cy	C2_PM/Cy	C2_PM/Cy	C2_PM/Cy		min	C2_PM/Cy	C2_PM/Cy	C2_PM/Cy	C2_PM/Cy	C2_PM/Cy	C2_PM/Cy	C2_PM/Cy	C2_PM/Cy	C2_PM/Cy	C2_PM/Cy		min	C2_PM/Cy	C2_PM/Cy	C2_PM/Cy	C2_PM/Cy	C2_PM/Cy
2.9257	0.266514	2.9186	0.27039		1	3.2891	3.1685	2.8739	2.9612	2.7342	2.8462	2.7566	2.6419	2.6164	3.369		1	2.5097	3.0702	3.2354	2.8808	2.8969
2.30186	0.244158	2.28506	0.144125		2	2.5241	2.3231	2.3441	2.6192	2.0905	2.2132	2.0602	2.1574	1.9906	2.6962		2	2.0745	2.3825	2.4154	2.3543	2.1986
2.22982	0.15249	2.30852	0.192066		3	2.4906	2.2862	2.2492	2.3052	2.3639	2.068	2.137	2.0105	2.0743	2.3133		3	2.0171	2.4525	2.4263	2.4408	2.2059
2.19865	0.21792	2.22074	0.232019		4	2.4006	2.1336	2.1834	2.2835	2.0675	2.0673	1.8526	2.3643	2.0293	2.6044		4	2.1037	2.3229	1.9191	2.2207	2.5373
2.23106	0.184116	2.10244	0.161859		5	2.358	2.4376	2.3706	2.2919	2.0686	2.369	2.1608	2.1082	1.8409	2.305		5	1.993	2.0344	2.1548	2.362	1.968
2.29358	0.190094	2.26574	0.211808		6	2.2686	2.4285	2.1623	2.3655	2.0906	2.3414	2.1293	2.6318	2.039	2.4788		6	2.3369	1.9589	2.3253	2.5287	2.1789
2.24195	0.215017	2.04302	0.17213		7	2.4845	2.4332	2.0703	2.3069	1.9521	2.3393	2.0066	2.5191	2.0025	2.305		7	1.9985	1.9141	1.9717	2.3455	1.9853
2.18082	0.154131	2.13428	0.0927691		8	2.3353	2.1607	2.0865	2.194	2.1984	2.2126	2.0077	2.3382	1.8918	2.383		8	2.1346	2.1479	2.0605	2.2804	2.048
2.17468	0.149391	2.0553	0.118171		9	2.45	2.0514	2.0626	2.2305	2.1206	2.1373	1.9474	2.3149	2.1291	2.303		9	1.9241	2.1002	1.9852	2.2322	2.0348
2.15224	0.195768	1.96308	0.137166		10	2.2707	2.0929	2.0437	1.9653	2.2218	2.4449	2.0064	2.1275	1.8854	2.4638		10	1.9862	2.052	1.7398	2.0921	1.9453
2.18416	0.174837	2.05304	0.166956		11	2.2718	2.2868	2.1182	1.9974	2.1568	2.381	1.9085	2.1775	2.0635	2.4801		11	2.0756	2.0081	1.8476	2.3098	2.0241
2.26803	0.271183	2.06828	0.144542		12	2.1327	2.3101	2.243	2.1314	2.1238	2.8572	1.9035	2.5384	2.0718	2.3684		12	2.0759	2.0848	1.8476	2.2538	2.0793
2.25189	0.128791	2.14998	0.150568		13	2.2576	2.2992	2.1647	2.2793	2.2691	2.5283	2.0187	2.1739	2.2395	2.2886		13	2.3032	2.1347	1.921	2.2676	2.1234
2.34791	0.208417	2.18524	0.166167		14	2.433	2.5969	2.2508	2.1861	2.2273	2.6662	2.0556	2.4317	2.1212	2.5103		14	2.2219	2.192	1.9134	2.3668	2.2321
2.39377	0.303781	2.18576	0.168591		15	2.5184	2.4399	2.4324	2.1708	2.0978	2.9913	2.0191	2.7266	2.1373	2.4041		15	2.2824	2.1289	1.9601	2.1504	2.407
2.45302	0.25832	2.15238	0.199316		16	2.5337	2.5458	2.2216	2.6946	2.2089	2.803	2.239	2.5333	2.0382	2.7121		16	2.4076	1.9771	1.9306	2.1797	2.2669
2.47111	0.335903	2.17564	0.188781		17	2.8484	2.518	2.1389	2.2292	2.7606	3.078	2.1813	2.5006	2.0749	2.3812		17	2.36	2.0318	1.9543	2.1599	2.3722
2.49692	0.305194	2.16938	0.17851		18	2.5073	2.454	2.4431	2.353	2.5577	3.2482	2.0277	2.4151	2.3886	2.5745		18	2.3492	2.1005	1.9049	2.1804	2.3119
2.47229	0.280302	2.12768	0.256359		19	2.4134	2.35	2.3775	2.3082	2.661	2.7684	2.3104	2.3013	2.1513	3.0814		19	2.4105	1.9439	1.7913	2.1839	2.3088
2.60624	0.298825	2.1347	0.186283		20	2.5685	2.5125	2.372	2.6733	2.5663	3.0527	2.439	2.3379	2.3345	3.2057		20	2.3714	1.9318	1.9652	2.1597	2.2454
2.5925	0.284978	2.09676	0.162691		21	2.6075	2.7415	2.4395	2.3395	2.5264	3.2556	2.3216	2.585	2.3299	2.7785		21	2.2092	1.9082	1.9351	2.1752	2.2561
2.62434	0.318414	2.08056	0.177182		22	2.4348	2.4354	2.6539	2.3958	2.672	3.3348	2.6068	2.5232	2.2271	2.9596		22	2.1999	1.9445	1.8691	2.2997	2.0896
2.53194	0.237608	2.1148	0.210136		23	2.3927	2.4749	2.575	2.6229	2.5969	2.8127	2.4611	2.2098	2.2142	2.9592		23	2.3313	1.9426	1.8511	2.2815	2.1675
2.56646	0.285099	2.09416	0.202922		24	2.4475	2.6647	2.4732	2.5574	2.5863	2.9618	2.5094	2.2518	2.1389	3.0736		24	2.2398	1.9457	1.8126	2.2659	2.2068
2.64021	0.374356	2.0252	0.112583		25	2.5477	2.8508	2.326	2.6645	2.3786	2.9627	2.7212	2.4364	2.1009	3.4133		25	2.064	1.9428	1.9039	2.1916	2.0237
2.5983	0.374308	1.99476	0.157469		26	2.4477	2.5211	2.3802	2.4533	2.538	2.9841	2.4793	2.566	2.1324	3.4809		26	2.0673	1.8895	1.8161	2.22	1.9809
2.48902	0.337903	1.96624	0.150902		27	2.5678	2.3507	2.593	2.2266	2.3507	2.9876	2.2134	2.3501	2.114	3.1363		27	1.9918	1.9102	1.7914	2.2024	1.9354
2.49518	0.315588	1.9285	0.170192		28	2.8185	2.3185	2.695	2.2188	2.3281	2.9302	2.2919	2.2408	2.1588	2.9512		28	1.9248	1.7795	1.7435	2.132	2.0627
2.46938	0.35071	1.96898	0.151254		29	2.4523	2.3735	2.4551	2.0655	2.4149	3.0823	2.4103	2.2047	2.1496	3.0856		29	2.0018	1.8434	1.8049	2.1833	2.0115
2.51791	0.232276	1.95702	0.155474		30	2.4299	2.3393	2.2888	2.6229	2.571	2.8435	2.5898	2.3493	2.2302	2.9144		30	1.9286	1.8649	1.8386	2.2262	1.9268
2.43265	0.342339	1.96918	0.16302		31	2.1769	2.1932	2.1925	2.36	2.5428	2.9699	2.462	2.1761	2.1648	3.0883		31	1.9682	1.9583	1.7443	2.205	1.9701
2.43368	0.267683	1.9283	0.13805		32	2.2987	2.3119	2.2676	2.4271	2.5761	2.8175	2.4401	2.1369	2.1369	2.924		32	1.8998	1.8741	1.7637	2.138	1.9659
2.43371	0.327721	1.93928	0.156259		33	2.2833	2.3542	2.1416	2.2243	2.4354	2.74	2.3607	2.3961	2.1691	3.2324		33	1.9182	1.8201	1.8304	2.2055	1.9222
2.38359	0.370099	1.99578	0.245959		34	2.0443	2.2261	2.2707	2.3761	2.4306	3.1227	2.1796	2.1152	2.1041	2.9665		34	2.0627	1.7881	1.743	2.3554	2.0297
2.40576	0.386165	2.0551	0.224977		35	2.1458	2.3318	2.0754	2.2266	2.5577	2.8597	2.384	2.0399	2.185	3.2517		35	2.1426	1.8199	1.8408	2.3545	2.1177
2.37636	0.365808	2.11618	0.209225		36	2.1563	2.3698	1.9971	2.2109	2.3184	2.9113	2.2813	2.1901	2.1714	3.157		36	2.2443	1.8789	1.914	2.3526	2.1911
2.35691	0.281633	2.05208	0.230389		37	2.2345	2.2503	2.1421	2.169	2.3469	2.6427	2.3021	2.2386	2.1929	3.05		37	2.1952	1.8181	1.8321	2.3496	2.0654
2.41557	0.392589	2.0835	0.268289		38	2.3561	2.0832	2.1509	2.2581	2.5497	2.6389	2.2288	2.2318	2.2376	3.4206		38	2.3826	1.7652	1.8508	2.2845	2.1344
2.30628	0.23266	2.00096	0.195045		39	2.2398	2.0739	2.2782	2.1986	2.4242	2.7275	2.2397	2.1917	2.0248	2.6644		39	2.0854	1.8109	1.8004	2.2585	2.0496
2.23672	0.207085	2.02386	0.206745		40	2.2556	2.0795	2.1458	2.0668	2.2618	2.653	2.1802	2.1706	2.0133	2.5406		40	2.0907	1.8146	1.833	2.3145	2.0665
2.24846	0.154139	1.95646	0.205133		41	2.1068	2.0116	2.24	2.3488	2.3789	2.4896	2.1301	2.2952	2.1075	2.3761		41	2.0019	1.7566	1.8012	2.276	1.9466
2.18193	0.14047	1.9817	0.208431		42	1.9515	2.2263	2.1277	2.3659	2.1192	2.3595	2.1579	2.273	1.9897	2.2486		42	2.0834	1.7761	1.7767	2.2615	2.0108
2.20835	0.182464	1.98124	0.234401		43	2.1042	2.1181	1.9548	2.126	2.3666	2.3061	2.1253	2.3485	2.0671	2.5668		43	2.1448	1.7068	1.7671	2.2413	2.0462
2.17043	0.219373	1.9549	0.229889		44	2.1656	1.8576	2.1403	2.2013	2.1741	2.3006	2.031	2.1368	2.0076	2.6894		44	2.1308	1.7318	1.7035	2.2112	1.9972
2.12698	0.118295	1.98808	0.223949		45	2.1032	2.0515	2.0176	2.2144	2.3168	2.1471	2.1285	2.0891	1.9264	2.2752		45	2.163	1.7788	1.7443	2.2457	2.0086
2.10212	0.157589	1.95204	0.16765		46	2.0776	2.0031	1.9779	2.0839	2.2768	2.151	2.0733	2.0254	1.9052	2.447		46	1.9718	1.8129	1.7892	2.2079	1.9784
2.09902	0.167419	1.9278	0.166631		47	2.1174	1.8407	1.9978	2.174	2.2476	2.1577	2.0859	2.0086	1.933	2.4275		47	2.0199	1.7458	1.7825	2.1471	1.9437
2.09177	0.210622	1.93382	0.187558		48	1.996	1.8541	2.0964	2.0869	2.3737	2.0441	1.974	2.0454	1.9065	2.5406		48	2.0078	1.7898	1.7068	2.1794	1.9853
2.05101	0.157872	1.90914	0.160597		49	1.9991	1.7901	2.0464	1.992	2.1932	2.0753	1.9945	2.1187	1.9249	2.3759		49	2.0032	1.7708	1.7268	2.1126	1.9323
2.01257	0.103038	1.87302	0.135335		50	1.9854	1.9554	1.9949	1.8554	1.9467	2.1786	2.0387	2.1444	1.9221	2.1041		50	1.9014	1.7465	1.7393	2.0654	1.9125
1.96985	0.0982623	1.8931	0.147924		51	1.9072	1.9544	1.8863	1.9187	1.9201	2.1164	2.0155	2.1316	1.8326	2.0157		51	1.873	1.7374	1.7763	2.0961	1.9827
1.96381	0.0854977	1.90246	0.198111		52	2.0526	1.9057	1.9867	1.8112	2.0382	1.957	1.9319	1.92	1.9267	2.1081		52	1.9675	1.7204	1.6774	2.1458	2.0012
1.94743	0.132742	1.92482	0.168503		53	1.8433	1.853	1.9668	1.9099	2.2334	1.995	1.7943	2.0048	1.8228	2.051		53	2.0537	1.7363	1.761	2.1059	1.9672
1.95721	0.118798	1.8503	0.145505		54	1.8574	1.8166	1.936	1.9637	2.0431	1.9912	1.9027	2.1774	1.8072	2.0768		54	1.9327	1.726	1.6802	2.0306	1.882
1.88138	0.103932	1.90606	0.158118		55	1.892	1.7656	1.8554	1.829	2.022	1.8372	1.7677	2.0296	1.8021	2.0132		55	2.0619	1.7548	1.7269	2.0458	1.9409
1.90448	0.133793	1.84956	0.149894		56	1.8453	1.7962	1.8264	1.9468	2.1954	1.8311	1.7943	2.0375	1.7925	1.9793		56	1.8433	1.8043	1.6547	2.0714	1.8741
1.93717	0.15656	1.82512	0.162062		57	1.8584	1.8339	2.0428	1.7474	2.2861	1.9164	1.7889	1.9554	1.9014	2.041		57	1.7768	1.7205	1.7133	2.1062	1.8088
1.92508	0.104869	1.88184	0.0997343		58	1.8635	1.7939	1.9087	2.0037	2.0756	1.8831	1.8868	2.0657	1.7785	1.9913		58	1.8587	1.812	1.8121	2.0534	1.873
1.92382	0.0814475	1.84386	0.125617		59	1.8618	1.8319	1.8959	1.842	2.0399	2.0058	1.915	2.0576	1.893	1.8953		59	1.7642	1.825	1.7025	2.0257	1.9019
1.91311	0.0835067	1.8758	0.153515		60	1.8082	1.7765	1.8674	1.9695	2.0052	1.8907	1.9187	2.0297	1.8854	1.9798		60	1.976	1.6879	1.7309	2.013	1.9712
1.89315	0.0821033	1.8889	0.166669		61	1.9248	1.8386	1.8685	1.9633	1.9484	1.7831	1.767	2.028	1.8764	1.9334		61	1.9669	1.7425	1.6989	2.1021	1.9341
1.85832	0.0715878	1.85904	0.154324		62	1.8184	1.7786	1.9721	1.8033	1.9898	1.8352	1.807	1.8747	1.8256	1.8785		62	1.8568	1.7205	1.7261	2.0982	1.8936
1.89211	0.0921825	1.84756	0.151688		63	1.9157	1.8012	1.9525	1.8003	2.0585	1.8097	1.8374	1.8599	1.8658	2.0201		63	1.7833	1.7483	1.733	2.1012	1.872
1.8451	0.0797966	1.8766	0.144167		64	1.8278	1.8049	1.9314	1.801	2.0098	1.7945	1.7883	1.9106	1.7525	1.8302		64	1.9271	1.7288	1.7219	2.0417	1.9635
1.88213	0.103517	1.84548	0.157054		65	1.9101	1.8403	1.9196	1.7394	2.0844	1.7933	1.8564	1.9945	1.8998	1.7835		65	1.9085	1.6692	1.698	2.0386	1.9131
1.87945	0.144811	1.83106	0.130761		66	1.8778	1.7669	1.9251	1.8837	2.2006	1.6675	1.7759	1.9609	1.9324	1.8037		66	1.8461	1.6827	1.7712	2.037	1.8183
1.83224	0.119489	1.85288	0.137894		67	1.7501	1.6553	1.9567	1.8137	1.9911	1.7412	1.7613	2.0144	1.8549	1.7837		67	1.8827	1.7368	1.7186	2.0615	1.8648
1.84117	0.149219	1.84202	0.161175		68	1.6847	1.6317	2.0164	1.8545	2.0239	1.7126	1.6948	1.9685	1.8706	1.954		68	1.8055	1.7251	1.6934	2.096	1.8901
1.86094	0.113935	1.88538	0.188519		69	1.8142	1.6692	1.9347	1.9519	2.0675	1.7305	1.8256	1.8827	1.8298	1.9033		69	1.9517	1.6561	1.7428	2.1335	1.9428
1.8722	0.0886826	1.83264	0.151543		70	1.8444	1.7854	1.8589	1.8943	1.9521	1.6875	1.8628	1.9638	1.8885	1.9843		70	1.8423	1.7243	1.6776	2.0686	1.8504
1.86606	0.109691	1.85124	0.159193		71	1.8352	1.8007	1.9053	1.8119	1.9657	1.6554	1.8165	2.0631	1.893	1.9138		71	1.8523	1.76	1.6788	2.1026	1.8625
1.86793	0.12129	1.8486	0.137904		72	1.9098	1.7757	1.9118	1.807	1.9192	1.6466	1.8508	2.1001	1.8069	1.9514		72	1.8319	1.7277	1.7144	2.0403	1.9287
1.85901	0.153347	1.85792	0.196923		73	1.868	1.8237	1.9267	1.8161	2.1156	1.6097	1.6875	2.0651	1.8788	1.7989		73	1.8378	1.6585	1.7323	2.1712	1.8898
1.84334	0.103821	1.87918	0.190014		74	1.8042	1.875	1.8621	1.8969	1.9494	1.6133	1.7561	1.9754	1.8816	1.8194		74	1.9452	1.6826	1.7016	2.1391	1.9274
1.84883	0.136695	1.89446	0.177415		75	1.8309	1.8025	1.9548	1.7225	2.085	1.6724	1.749	2.0354	1.8675	1.7683		75	1.954	1.7311	1.7105	2.1394	1.9373
1.81372	0.128335	1.85238	0.138076		76	1.9809	1.8481	1.9156	1.7736	1.9559	1.5997	1.6196	1.8514	1.8224	1.77		76	1.9015	1.7385	1.6778	2.0017	1.9424
1.79767	0.0834636	1.81942	0.143423		77	1.8287	1.8442	1.8979	1.7407	1.9506	1.72	1.6756	1.7638	1.7766	1.7786		77	1.832	1.6813	1.6697	1.9941	1.92
1.77105	0.084169	1.80516	0.170529		78	1.7949	1.7444	1.8852	1.7422	1.8713	1.6211	1.674	1.843	1.7942	1.7402		78	1.7797	1.6841	1.6184	2.0446	1.899
1.79887	0.10328	1.81612	0.154174		79	1.7964	1.8158	2.0096	1.7971	1.7717	1.6126	1.6977	1.8638	1.7889	1.8351		79	1.8579	1.6772	1.6314	1.9668	1.9473
1.79352	0.106034	1.7834	0.104675		80	1.8401	1.7482	2.0335	1.852	1.7664	1.6245	1.7336	1.7645	1.8187	1.7537		80	1.7923	1.7	1.6777	1.942	1.805
1.79242	0.0963828	1.75536	0.106319		81	1.737	1.8412	1.9021	1.8327	1.8355	1.6876	1.5907	1.8901	1.7794	1.8279		81	1.7091	1.7247	1.6207	1.8896	1.8327
1.7948	0.0796924	1.7594	0.119406		82	1.7249	1.8389	1.9421	1.7171	1.8128	1.7833	1.6802	1.8793	1.8135	1.7559		82	1.7915	1.6549	1.6156	1.8902	1.8448
1.79681	0.0910026	1.7764	0.126452		83	1.7637	1.8368	1.7629	1.8577	1.9459	1.6361	1.7048	1.7475	1.878	1.8347		83	1.8497	1.6443	1.6328	1.8817	1.8735
1.80196	0.106404	1.78142	0.153171		84	1.711	1.8254	1.774	1.7725	2.0363	1.6654	1.7253	1.7671	1.8473	1.8953		84	1.8789	1.611	1.6189	1.9233	1.875
1.81203	0.115763	1.7812	0.119817		85	1.7316	1.7733	1.9199	1.775	1.9089	1.6664	1.7199	2.0528	1.7612	1.8113		85	1.7175	1.6828	1.6962	1.9592	1.8503
1.81758	0.107818	1.83382	0.142118		86	1.8147	1.7238	1.9867	1.7834	1.885	1.7008	1.7331	1.9625	1.8891	1.6967		86	1.913	1.6861	1.6726	1.9612	1.9362
1.76121	0.0889561	1.79776	0.121304		87	1.7814	1.7181	1.844	1.7887	1.8218	1.7175	1.6828	1.8767	1.8052	1.5759		87	1.8483	1.6676	1.6772	1.9468	1.8489
1.82585	0.0957876	1.80856	0.125819		88	1.9121	1.8053	1.8307	1.8182	1.932	1.7486	1.7166	1.9988	1.7897	1.7065		88	1.8285	1.6808	1.6799	1.9591	1.8945
1.82031	0.113391	1.8182	0.111982		89	1.8262	1.8403	1.8991	1.76	2.0136	1.6566	1.737	1.9616	1.8076	1.7011		89	1.8431	1.6941	1.7282	1.9766	1.849
1.83198	0.0985739	1.81808	0.146388		90	1.8856	1.7561	1.9618	1.8596	1.9447	1.6931	1.7142	1.8876	1.8832	1.7339		90	1.7491	1.6957	1.7115	2.0386	1.8955
1.80549	0.0956416	1.80588	0.156853		91	1.8196	1.7661	1.8335	1.8761	1.8922	1.6246	1.679	1.9407	1.8218	1.8013		91	1.8798	1.6391	1.6675	2.0196	1.8234
1.84901	0.0899892	1.8315	0.179394		92	1.8928	1.8296	1.8496	1.8788	2.0116	1.7228	1.7263	1.9292	1.873	1.7764		92	1.9086	1.6313	1.6926	2.0831	1.8419
1.81863	0.0756263	1.82588	0.150832		93	1.8301	1.6778	1.9119	1.8377	1.8331	1.7827	1.7252	1.8816	1.7989	1.9073		93	1.9565	1.6689	1.6763	1.9895	1.8382
1.88364	0.0985922	1.82572	0.161563		94	1.9348	1.8721	1.9764	1.9055	1.8495	1.6599	1.8117	2.0104	1.8765	1.9396		94	1.8986	1.648	1.6576	1.9938	1.9306
1.8432	0.116695	1.83364	0.160592		95	1.8319	1.791	1.9788	1.9571	1.8556	1.596	1.7438	1.9361	1.8115	1.9302		95	1.8678	1.6766	1.6814	2.0615	1.8809
1.86929	0.144739	1.80798	0.163322		96	1.8127	1.7874	1.8241	1.9603	1.9736	1.6054	1.7184	1.963	1.9593	2.0887		96	1.8289	1.6358	1.6808	2.0513	1.8431
1.842	0.150342	1.7798	0.167846		97	1.8062	1.7925	1.828	1.9588	1.8262	1.6194	1.6579	1.9023	1.8745	2.1542		97	1.7993	1.6047	1.639	2.0226	1.8334
1.88149	0.175971	1.7934	0.141049		98	1.7744	1.7982	1.9448	1.9934	1.9244	1.6204	1.7122	1.997	1.8123	2.2378		98	1.8617	1.6345	1.7025	1.9958	1.7725
1.87566	0.182068	1.79306	0.100814		99	1.8361	1.6848	1.8233	1.8099	2.0076	1.7524	1.7586	1.943	1.8189	2.322		99	1.8665	1.6747	1.7205	1.9192	1.7844
1.84143	0.136623	1.7598	0.115933		100	1.8972	1.7481	1.8575	1.8189	1.8625	1.669	1.668	1.8558	1.8919	2.1454		100	1.7926	1.6219	1.6552	1.8839	1.8454
1.89893	0.142951	1.81256	0.102469		101	1.918	1.7555	1.8666	1.8467	1.8453	1.7143	1.8423	2.0004	1.9822	2.218		101	1.7297	1.7634	1.7446	1.9762	1.8489
1.8805	0.15036	1.81536	0.0955864		102	1.9453	1.8011	1.8905	1.7471	1.8138	1.8219	1.7543	1.834	1.9341	2.2629		102	1.8249	1.7173	1.73	1.8552	1.9494
1.89038	0.138203	1.82748	0.127184		103	1.8485	1.6868	1.8283	1.8244	1.9453	1.7569	1.9282	1.9282	1.9647	2.1925		103	1.904	1.6699	1.7113	1.9492	1.903
1.88513	0.183841	1.85044	0.141061		104	1.8202	1.6685	1.9505	1.8127	2.0249	1.7668	1.7141	1.8874	1.8961	2.3101		104	1.889	1.647	1.7976	1.8878	2.0308
1.88706	0.150155	1.84	0.136475		105	1.8199	1.7805	1.8737	1.7449	1.8372	1.9033	1.7187	2.0524	1.9263	2.2137		105	1.9733	1.6541	1.7419	1.8909	1.9398
1.92949	0.197112	1.8488	0.140034		106	1.8878	1.7398	1.9042	1.7612	1.9515	2.0056	1.7737	1.9652	1.8779	2.428		106	1.8826	1.6225	1.8208	1.9368	1.9813
1.95506	0.154012	1.83974	0.161942		107	1.8794	1.8139	1.9065	1.9125	1.91	1.955	1.8228	2.0117	1.9836	2.3552		107	1.9944	1.6658	1.6625	1.9369	1.9391
1.99237	0.220081	1.82242	0.136113		108	1.9558	1.8019	1.9451	1.8442	2.0331	2.0012	1.8494	2.0153	1.8998	2.5779		108	1.8782	1.6883	1.6651	1.9559	1.9246
1.93123	0.157396	1.83584	0.132495		109	1.7873	1.8018	1.8671	1.7462	2.0171	2.0612	1.8353	1.9381	1.9962	2.262		109	1.8728	1.6875	1.7124	1.9982	1.9083
1.91265	0.147734	1.81456	0.100145		110	1.7501	1.8081	1.8644	1.8076	2.1126	2.1664	1.7648	1.9394	1.8702	2.0429		110	1.8417	1.712	1.7072	1.9237	1.8882
1.94471	0.22188	1.80644	0.127674		111	1.8461	1.7932	1.8698	1.8314	1.8654	2.4837	1.7957	1.995	1.7998	2.167		111	1.8433	1.6747	1.6766	1.9656	1.872
1.94709	0.18638	1.80886	0.120907		112	1.8231	1.828	1.9024	1.7872	1.9352	2.4403	1.8736	1.9427	1.9157	2.0227		112	1.8187	1.6834	1.6888	1.9417	1.9117
1.92781	0.200404	1.81618	0.121694		113	1.7818	1.7997	1.8759	1.8134	1.9211	2.4639	1.8202	1.8984	1.8931	2.0106		113	1.7884	1.793	1.6417	1.8967	1.9611
1.94663	0.18826	1.83104	0.0648082		114	1.7842	1.7645	1.895	1.9176	1.9993	2.4198	1.8483	1.8637	1.9182	2.0557		114	1.7799	1.8424	1.7495	1.8966	1.8868
1.9166	0.215575	1.79806	0.0950114		115	1.8306	1.7392	1.9659	1.8263	1.8773	2.504	1.8236	1.8033	1.8937	1.9021		115	1.8095	1.722	1.6817	1.8768	1.9003
1.93283	0.17774	1.82842	0.0781155		116	1.7852	1.8316	2.0073	1.8119	1.8873	2.4	1.8569	1.9685	1.9127	1.8669		116	1.8344	1.7883	1.7195	1.8817	1.9182
1.9664	0.171023	1.84464	0.089586		117	1.9209	1.8834	2.0155	1.7999	1.9345	2.3416	1.7349	1.8879	2.0738	2.0716		117	1.7909	1.8068	1.7479	1.9574	1.9202
1.91272	0.1138	1.85056	0.0929704		118	1.9206	1.9003	1.869	1.827	1.9422	2.1725	1.7448	1.8403	1.9264	1.9841		118	1.7816	1.8419	1.7798	1.8419	2.0076
1.97047	0.0982115	1.86332	0.0330395		119	1.8878	1.966	1.9619	1.8172	2.1168	2.1399	1.9261	1.9264	1.9487	2.0139		119	1.8278	1.8606	1.9041	1.8353	1.8888
1.96547	0.11019	1.83138	0.0426806		120	1.9291	2.0152	2.0036	1.7862	2.0982	2.1484	1.8941	1.9073	2.0092	1.8634		120	1.7619	1.8736	1.8564	1.8374	1.8276
1.91875	0.0945002	1.85498	0.0928283		121	1.824	2.0287	1.8468	1.8628	1.8276	2.0435	1.8247	1.9509	1.9288	2.0497		121	1.7311	1.9556	1.789	1.9178	1.8814
1.89918	0.100175	1.83242	0.0833946		122	1.7401	1.895	1.9391	1.9272	1.8022	1.9039	1.7811	2.0208	1.9299	2.0525		122	1.7357	1.8409	1.7641	1.9378	1.8836
1.86817	0.101954	1.82368	0.046342		123	1.7771	1.908	1.9358	1.9756	1.7868	1.7091	1.8387	1.8409	1.8574	2.0523		123	1.7734	1.8313	1.7823	1.8852	1.8462
1.87997	0.120633	1.90888	0.15343		124	1.8923	2.0676	1.8888	2.041	1.8419	1.7167	1.7904	1.9983	1.7847	1.778		124	1.8225	2.0959	1.7315	2.0403	1.8542
1.89944	0.151254	1.8607	0.124542		125	2.1175	1.8511	1.7664	2.2149	1.8362	1.8041	1.8766	1.9404	1.8171	1.7701		125	1.6621	1.9828	1.8621	1.9476	1.8489
1.93923	0.161051	1.8598	0.140088		126	2.0333	2.0016	1.79	2.2616	1.7334	1.8242	1.8829	2.0029	1.8056	2.0568		126	1.7199	2.0891	1.7829	1.8669	1.8402
1.93643	0.119217	1.91104	0.161347		127	1.9263	1.9818	1.8818	2.1305	1.7606	1.8572	1.8746	1.9617	1.8596	2.1302		127	1.7983	2.1912	1.8207	1.9025	1.8425
1.93984	0.0964786	1.93526	0.188301		128	1.9402	1.9606	1.9125	2.0734	1.9241	1.7789	1.9021	1.9334	1.8586	2.1146		128	1.7946	2.2553	1.8707	1.9444	1.8113
1.97719	0.130448	1.90168	0.203433		129	2.0283	1.9378	1.8379	2.1452	1.9329	1.858	2.0982	1.98	1.789	2.1646		129	1.7389	2.2467	1.7879	1.916	1.8189
2.00189	0.210739	1.94554	0.215953		130	2.0229	1.8876	1.8226	2.3624	1.9093	1.814	2.1912	1.8598	1.8362	2.3129		130	1.767	2.3128	1.81	1.9183	1.9196
1.95442	0.107828	1.908	0.11729		131	2.0243	2.0385	1.9301	2.0295	1.8553	1.8541	1.8916	1.8749	1.8698	2.1761		131	1.9336	2.0808	1.7654	1.8439	1.9163
1.88755	0.0871332	1.89656	0.112398		132	2.032	1.8086	1.9259	1.9101	1.7864	1.84	1.9913	1.824	1.8018	1.9554		132	1.8383	2.0838	1.8063	1.8373	1.9171
1.90565	0.0844657	1.89868	0.0780805		133	2.0112	1.9806	1.9417	1.8462	1.9088	1.8185	1.9938	1.8716	1.7472	1.9369		133	1.9639	1.9372	1.793	1.8385	1.9608
1.91086	0.0805785	1.94472	0.104885		134	1.9604	1.9349	1.8424	1.889	1.8986	1.8463	2.0581	1.9452	1.7689	1.9648		134	2.0307	1.9819	1.8055	1.8641	2.0414
1.96143	0.151661	1.90006	0.117411		135	2.0507	1.861	1.9231	1.8373	1.8191	2.1719	2.204	1.9028	1.777	2.0674		135	1.9966	1.9159	1.731	1.8407	2.0161
1.91275	0.11153	1.8952	0.063924		136	2.1095	1.9352	1.8904	1.8335	1.7756	1.9914	1.9356	1.8688	1.7563	2.0312		136	1.8997	1.9358	1.7919	1.8903	1.9583
1.91129	0.0982471	1.8841	0.069187		137	1.9728	1.9132	1.8918	1.8523	1.7444	1.9282	2.0754	1.9498	1.7877	1.9973		137	1.8674	1.9519	1.7835	1.8706	1.9471
1.90317	0.141828	1.86548	0.0515597		138	1.8711	1.8796	1.8307	1.8786	1.7051	1.9422	2.1109	1.854	1.7854	2.1741		138	1.7741	1.8995	1.889	1.8827	1.8821
1.88379	0.164358	1.8384	0.101945		139	1.9041	1.9275	1.8165	1.791	1.7204	1.8174	2.247	1.9668	1.6647	1.9825		139	1.7364	1.991	1.7531	1.8547	1.8568
1.92838	0.144605	1.85366	0.110547		140	1.9507	2.019	1.8437	1.8004	1.9488	1.8137	2.2482	1.9518	1.7346	1.9729		140	1.8156	2.0196	1.729	1.8054	1.8987
1.88584	0.114102	1.87028	0.121537		141	1.9332	1.8507	1.8709	1.7088	1.7763	1.895	2.0015	1.9655	1.7754	2.0811		141	1.773	2.0281	1.7254	1.9216	1.9033
1.88251	0.109733	1.9368	0.103685		142	1.8431	1.8225	1.9393	1.8094	1.7828	1.8833	2.0893	1.8404	1.768	2.047		142	1.8749	2.0728	1.8185	1.9055	2.0123
1.86617	0.0968835	1.92562	0.0850063		143	2.0447	1.8949	1.8449	1.7624	1.7866	1.9663	1.8137	1.8442	1.7506	1.9534		143	1.8165	1.9709	1.966	1.8566	2.0181
1.94255	0.144358	1.90084	0.132628		144	2.2059	1.9252	1.8159	1.7946	1.8975	2.0497	1.8617	1.9828	1.7754	2.1168		144	1.7043	2.0679	1.9411	1.9282	1.8627
1.92491	0.114087	1.89484	0.151471		145	2.0628	1.9358	1.9	1.7913	1.7312	1.9382	2.0856	1.9212	1.8536	2.0294		145	1.6857	2.1046	1.9463	1.8727	1.8649
1.94514	0.144818	1.94178	0.176878		146	2.0452	1.8166	1.8703	1.8423	1.8002	1.9713	2.2561	1.8589	1.9081	2.0824		146	1.7477	2.1802	2.0683	1.8601	1.8526
1.99111	0.176364	1.87228	0.128359		147	2.1712	2.0243	1.9014	1.8524	1.8433	1.9959	2.1996	1.8041	1.8255	2.2934		147	1.7577	2.0712	1.7599	1.8767	1.8959
1.93364	0.167322	1.84248	0.133613		148	2.1468	1.9247	1.8325	1.7652	1.7678	1.8373	2.1763	1.8568	1.8514	2.1776		148	1.6727	2.0068	1.7445	1.8764	1.912
1.95823	0.215774	1.8715	0.0824727		149	2.2539	1.8489	1.7529	1.7638	1.7405	1.9165	2.0869	1.9036	1.9438	2.3715		149	1.7854	1.9913	1.8028	1.8816	1.8964
1.99192	0.189115	1.92838	0.179626		150	2.21	1.93	1.7697	1.916	1.7974	1.9282	2.3504	1.9542	1.8896	2.1737		150	1.7518	2.2164	1.8317	1.8687	1.9733
1.95606	0.170095	1.87444	0.130578		151	2.2429	1.9251	1.813	1.8007	1.814	1.9821	2.2197	1.8184	1.8658	2.0789		151	1.7499	2.0435	1.7459	1.8714	1.9615
1.92938	0.182649	1.87746	0.102861		152	2.3082	2.0058	1.8281	1.7898	1.7443	1.927	2.1628	1.804	1.8003	1.9235		152	1.762	1.8875	1.8027	2.027	1.9081
1.96189	0.167102	1.90262	0.036776		153	2.269	1.8372	1.7768	1.8335	1.8176	2.0654	2.1473	1.8436	1.9627	2.0658		153	1.8589	1.9442	1.9152	1.9253	1.8695
1.95137	0.124386	1.91708	0.0246614		154	1.9978	1.894	1.8111	2.0165	1.8016	2.068	2.0701	1.8542	1.8493	2.1511		154	1.926	1.926	1.9472	1.8827	1.9035
1.92513	0.142637	1.87488	0.0408197		155	2.1188	1.8328	1.8586	1.9102	1.6947	2.022	1.9995	1.887	1.7907	2.137		155	1.8557	1.8776	1.943	1.8616	1.8365
1.95612	0.103011	1.86192	0.0474125		156	2.0198	2.0917	1.8278	1.9109	1.9303	2.1576	1.9014	1.8633	1.9184	1.94		156	1.8951	1.875	1.7976	1.9123	1.8296
1.93687	0.140915	1.93698	0.137877		157	2.2757	1.9085	1.8393	1.8463	1.9582	2.0769	1.8111	1.8868	1.8587	1.9072		157	2.1479	1.92	1.7795	1.8649	1.9726
1.89102	0.0973613	2.05106	0.164886		158	2.0754	1.8308	1.8525	1.9142	1.7935	1.9712	1.8669	1.764	1.8459	1.9958		158	2.307	2.001	1.8493	2.0524	2.0456
1.9005	0.113871	2.02024	0.204188		159	2.0986	1.8863	1.8313	1.7889	1.8397	2.0566	1.873	1.8605	1.7644	2.0057		159	1.9929	2.3313	1.7777	1.9304	2.0689
1.91204	0.159017	1.89868	0.0754134		160	2.3017	1.8444	1.7945	1.7908	1.8583	2.0379	1.8364	1.8084	1.8641	1.9839		160	1.8419	1.9468	1.8022	1.9168	1.9857
1.88828	0.123488	1.92194	0.053885		161	2.0824	1.8347	1.8203	1.8318	1.7602	1.9493	1.888	1.8853	1.732	2.0988		161	1.9426	1.9836	1.8429	1.8965	1.9441
1.92481	0.114549	1.8398	0.052157		162	2.1337	1.8469	1.9263	1.8828	1.8039	2.0134	1.7517	1.8945	1.9606	2.0343		162	1.8506	1.7746	1.7975	1.8832	1.8931
1.91053	0.12057	1.93676	0.10216		163	2.1479	1.8848	1.8769	1.7927	1.8062	2.0005	1.7493	1.9251	1.8956	2.0263		163	1.9987	1.9935	1.7611	1.932	1.9985
1.96789	0.149124	1.97686	0.120243		164	1.982	1.9518	1.8076	2.0345	1.8603	1.9323	1.8535	2.082	1.8616	2.3133		164	2.0299	1.9745	1.8188	1.9204	2.1407
2.10151	0.13892	2.17326	0.151316		165	2.3964	2.0701	1.9336	2.0042	1.9427	2.1685	2.1137	2.1578	2.0282	2.1999		165	2.0653	2.0832	2.4291	2.0959	2.1928
1.93821	0.143877	2.01522	0.189424		166	2.1199	2.1489	1.823	1.9406	1.6844	1.9596	1.9122	1.9335	1.8077	2.0523		166	1.9063	1.9525	2.3511	1.9064	1.9598
1.95782	0.175669	1.94736	0.110383		167	2.2731	2.098	1.8665	1.8818	1.8476	1.9389	1.8268	1.8631	1.7635	2.2189		167	1.9921	1.8601	1.8935	1.8699	2.1212
1.92697	0.158495	1.9266	0.0987193		168	2.2345	2.0887	1.7909	1.8689	1.7788	2.0151	1.7967	2.0003	1.7507	1.9451		168	1.8626	1.8636	2.0486	1.8396	2.0186
1.93839	0.10989	1.93624	0.0183549		169	2.0776	1.9713	1.8292	2.0079	1.7907	2.0063	1.7923	2.0469	1.854	2.0077		169	1.9348	1.9267	1.9556	1.9115	1.9526
1.98939	0.150829	1.95544	0.0681661		170	2.1689	2.1233	1.9245	2.1944	1.831	2.0631	1.8343	2.0535	1.7761	1.9248		170	1.9527	2.0631	1.8828	1.9149	1.9637
1.90368	0.107178	1.9786	0.145244		171	2.0043	1.8757	1.7902	2.0195	1.8153	2.026	1.8602	1.9736	1.7188	1.9532		171	1.9544	2.189	1.7811	1.9691	1.9994
1.90214	0.0885216	1.95886	0.0772117		172	1.9583	2.0635	1.8026	1.921	1.9145	2.0056	1.813	1.8048	1.8517	1.8864		172	1.887	2.0722	1.9392	1.8969	1.999
1.8844	0.079113	1.9807	0.103446		173	2.0643	1.8201	1.8399	1.8896	1.8879	1.8712	1.8432	1.8396	1.8112	1.977		173	1.8996	2.1474	1.8906	1.9705	1.9954
1.90856	0.140883	1.99136	0.0652491		174	2.1105	1.7838	1.8722	1.8655	1.8297	1.8206	1.8131	1.9639	1.8246	2.2017		174	1.9657	2.1029	1.9388	1.9572	1.9922
1.95878	0.198543	2.04644	0.168068		175	2.3727	2.0816	1.896	1.8148	1.9483	1.7298	1.879	1.935	1.7602	2.1704		175	2.0437	2.3316	1.8966	1.9656	1.9947
1.97338	0.145123	2.01712	0.0941026		176	2.0577	2.0877	1.8134	1.9548	1.8926	1.7509	1.9505	2.0552	1.9196	2.2514		176	1.989	2.1225	2.1098	1.9479	1.9164
1.9162	0.134819	1.98426	0.151712		177	2.087	1.8978	1.8077	1.8622	1.778	1.909	1.8004	2.0005	1.8333	2.1861		177	1.8629	2.212	2.0673	1.9074	1.8717
1.9357	0.121594	2.08116	0.155836		178	2.1012	1.8958	1.7542	1.7953	1.8953	2.0011	1.9135	1.9261	1.927	2.1475		178	1.9869	2.2478	2.2547	1.9501	1.9663
1.90973	0.148691	2.2242	0.218183		179	1.809	1.8677	1.7922	2.059	1.8968	2.0139	1.7486	1.8063	1.8746	2.2292		179	2.3846	2.3811	2.3841	1.9677	2.0035
1.88993	0.109064	2.10028	0.175275		180	1.8893	1.8695	1.9947	1.8157	1.9077	1.7951	1.789	1.8597	1.8312	2.1474		180	2.2913	2.2755	2.0604	1.9165	1.9577
1.91209	0.0864529	2.02986	0.168679		181	1.8159	1.9928	1.9317	1.8265	1.926	1.8244	1.9196	1.9342	1.8577	2.0921		181	2.0362	2.2708	2.0921	1.9195	1.8307
1.93482	0.086211	2.10568	0.199036		182	1.9254	2.0309	1.9384	1.9408	2.0303	2.0177	1.7407	1.8887	1.8938	1.9415		182	2.2604	2.3482	2.0957	1.8944	1.9297
1.96278	0.0834956	2.13422	0.23602		183	1.9187	1.9868	2.0303	1.9177	1.9948	2.027	1.8252	1.9277	1.8867	2.1129		183	2.1175	2.5322	2.0912	1.9146	2.0156
2.03173	0.10444	2.1263	0.241972		184	1.885	2.0591	2.1648	2.0285	1.8303	2.1018	2.0421	2.0368	2.1436	2.0253		184	2.1334	2.5316	1.9239	1.9627	2.0799
2.033	0.159723	2.15136	0.260224		185	1.7536	2.0215	2.2913	2.0411	1.9513	1.9707	2.2902	2.0116	2.0503	1.9484		185	2.2899	2.5431	1.9219	1.9884	2.0135
2.01082	0.151946	2.01	0.0898482		186	1.8629	1.9142	2.3765	1.8927	1.9353	1.9204	2.0731	2.0747	2.0857	1.9727		186	2.0258	2.1442	1.897	2.0085	1.9745
2.03515	0.227195	2.19382	0.410591		187	1.7976	1.9374	2.4878	1.8851	1.808	1.899	2.3144	1.9696	2.0936	2.159		187	1.9041	2.2854	2.872	2.0124	1.8952
1.92599	0.160142	2.10732	0.243726		188	1.8991	1.8604	2.2011	1.7837	1.7205	1.748	2.0851	1.9117	1.9518	2.0985		188	1.8497	2.4338	2.2841	2.0247	1.9443
1.96298	0.0719441	2.00602	0.0406863		189	1.957	1.857	2.0189	1.9681	1.9136	1.8834	1.9675	2.1071	1.9461	2.0111		189	1.9413	2.0408	2.0305	1.9913	2.0262
1.89653	0.106029	2.14132	0.172815		190	1.8146	1.8093	1.8004	1.8392	2.029	1.7769	2.0702	1.9062	2.0057	1.9138		190	2.0603	2.4274	2.153	2.0939	1.972
1.90204	0.0664468	2.29058	0.427307		191	1.9237	1.7921	1.9192	2.0386	1.8772	1.888	1.8911	1.8906	1.8401	1.9598		191	1.9753	2.9923	2.3313	2.2281	1.9259
1.96501	0.124933	2.06796	0.127235		192	2.052	1.8407	2.0812	2.1587	1.8595	1.7798	1.8918	1.9927	1.9167	2.077		192	2.1097	2.2464	1.9361	2.0941	1.9535
1.94801	0.160936	2.06786	0.0995727		193	1.9547	1.7292	1.9871	1.9739	1.8637	1.7843	2.1041	1.9457	1.8501	2.2873		193	2.0466	2.1254	2.0813	2.1743	1.9117
1.95726	0.237395	2.10026	0.088672		194	1.9356	1.6675	1.9059	1.8967	1.9983	1.9116	2.0364	1.8652	1.7899	2.5655		194	2.1514	2.1382	2.1836	2.0669	1.9612
1.94959	0.084599	2.2171	0.271874		195	1.9284	1.9217	2.109	1.8593	1.9396	1.8013	1.9808	1.9886	1.9467	2.0205		195	2.0449	2.6381	2.2699	2.2086	1.924
1.96679	0.127809	2.10318	0.234905		196	1.8812	2.0347	1.9908	1.8997	1.9911	1.8182	2.2307	1.8572	1.8699	2.0944		196	1.9166	2.3451	2.3579	2.0331	1.8632
1.96731	0.123787	2.10578	0.380461		197	1.8433	1.9557	1.8674	2.0809	2.1167	1.9199	2.1826	1.9482	1.7995	1.9589		197	1.8555	2.755	2.1164	1.9748	1.8272
1.92351	0.129892	2.12236	0.305856		198	1.873	1.8122	1.7974	1.8276	1.9712	1.878	1.9852	2.0451	1.8367	2.2087		198	1.9241	2.6433	2.1292	2.0253	1.8899
1.87933	0.0759572	2.14632	0.143147		199	1.7364	1.8298	1.8042	1.9003	1.879	1.8568	1.9558	1.9348	1.903	1.9932		199	2.1303	2.3668	2.1832	2.0618	1.9895
1.94048	0.152904	2.12432	0.355047		200	1.7856	1.8152	1.8757	2.2041	1.9998	1.725	1.9744	1.9179	1.9539	2.1532		200	2.0314	2.7542	1.9051	1.978	1.9529
2.01414	0.239736	2.16472	0.385094		201	1.8324	1.7865	1.8239	2.1132	1.9025	1.6663	2.16	2.2283	2.2603	2.368		201	1.9119	2.8454	2.0201	2.0727	1.9735
1.90895	0.146503	2.03232	0.104351		202	1.8125	1.7963	1.734	1.9428	1.9315	1.7411	1.9643	1.942	2.2214	2.0036		202	1.9829	1.9139	2.1546	2.1296	1.9806
1.92221	0.165089	1.99378	0.128976		203	1.9063	1.7458	1.8165	1.7784	1.8249	1.9812	1.9758	2.058	2.2973	1.8379		203	1.8214	2.1052	1.9825	2.134	1.9258
1.93868	0.190682	1.9353	0.143989		204	1.8199	1.8683	1.6867	1.9526	1.8873	1.8615	1.9385	2.0248	2.4166	1.9306		204	1.9863	1.7711	1.8128	2.1259	1.9804
1.96953	0.120035	1.93038	0.0706238		205	1.8288	1.7832	1.8857	2.0688	2.0895	1.8739	2.0902	2.0112	1.9591	2.1049		205	1.9341	1.8121	1.9436	1.9989	1.9632
1.93775	0.185106	1.97252	0.126591		206	1.7939	1.8151	1.8151	2.3033	1.928	1.7194	2.0947	2.045	1.7901	2.0729		206	1.7857	1.9869	2.0325	2.1264	1.9311
1.94941	0.142268	2.15998	0.174672		207	1.7735	1.8227	1.8818	2.2881	1.8848	2.0123	2.0171	1.9049	1.9783	1.9306		207	1.9134	2.3207	2.3358	2.13	2.1
1.98214	0.139244	2.1301	0.179201		208	1.8157	1.8544	1.8784	2.1705	1.7886	2.0972	2.1054	1.9662	2.0428	2.1022		208	1.9131	2.1378	2.4023	2.1498	2.0475
1.95016	0.156448	2.1829	0.19873		209	1.8806	1.7841	1.8246	2.0869	1.8408	2.1416	1.8297	2.219	1.8523	2.042		209	2.0564	2.1087	2.5272	2.1728	2.0494
1.97972	0.127818	2.13926	0.165914		210	1.9002	1.9391	1.8445	2.1987	1.9548	1.862	2.0523	1.9839	1.8762	2.1855		210	1.9673	2.0656	2.407	2.1681	2.0883
1.89679	0.145253	2.10062	0.261931		211	1.7663	1.7452	1.7548	2.1936	1.841	1.7899	1.968	1.9297	1.9469	2.0325		211	1.7493	2.0773	2.4884	2.0952	2.0929
1.8967	0.161356	2.07198	0.335389		212	1.7002	1.8018	1.6608	1.8585	1.7901	2.0257	2.1322	1.9295	1.9737	2.0945		212	1.6378	2.5258	1.9932	1.9474	2.2557
1.93845	0.142766	2.13848	0.191251		213	1.7964	1.8224	1.7354	2.0377	1.822	2.1874	2.0557	1.945	1.9476	2.0349		213	1.9957	2.359	1.9613	2.0451	2.3313
1.96701	0.0873063	2.11406	0.116689		214	1.9072	1.9548	1.8607	1.9557	1.9026	1.9377	2.1578	1.927	2.0046	2.062		214	2.1383	2.0251	2.0232	2.0787	2.305
1.92469	0.123673	2.0531	0.186357		215	1.7735	1.9266	1.7824	1.9495	1.8325	1.9627	2.0861	1.8968	2.1591	1.8777		215	1.8779	1.8595	2.2455	2.046	2.2366
1.92951	0.130749	2.30316	0.457856		216	1.7093	1.8529	1.8074	1.9826	1.9811	1.8941	2.1112	1.834	2.0388	2.0837		216	1.9359	1.9938	3.0702	2.1699	2.346
1.9433	0.113408	2.24306	0.421267		217	1.8439	1.8996	1.7794	2.0247	1.9273	1.8095	1.9614	1.9862	2.1195	2.0815		217	1.9821	2.0244	2.9616	1.9669	2.2803
1.91367	0.123369	2.17694	0.3405		218	1.8685	1.8337	1.7981	2.2369	1.8401	1.8721	1.9133	1.9702	1.895	1.9088		218	1.8986	1.936	2.7182	2.0336	2.2983
1.9399	0.139578	2.43352	0.785743		219	1.8054	1.8474	1.8137	2.2155	1.8689	1.802	2.032	1.9952	1.9335	2.0854		219	1.9473	2.0058	3.8237	2.1495	2.2413
1.92254	0.102598	2.30582	0.551535		220	1.7716	1.9368	1.8896	2.0131	1.7978	1.8701	2.1063	1.9455	2.013	1.8816		220	1.8465	1.9678	3.2393	2.164	2.3115
1.9212	0.114573	2.13342	0.31513		221	1.8652	1.8413	1.7508	1.9931	1.8645	1.8932	2.0596	2.1454	1.8944	1.9045		221	1.8738	1.9304	2.6681	2.0893	2.1055
1.89503	0.119666	2.27054	0.485274		222	1.7204	1.7218	1.8177	2.0494	1.9408	2.0476	1.9699	1.9629	1.8759	1.8439		222	1.9249	1.9062	3.0491	2.0347	2.4378
1.89756	0.128598	2.04548	0.225969		223	1.6534	1.8506	1.8193	1.9798	1.8171	1.9825	2.1338	1.8642	1.9504	1.9245		223	1.777	1.8666	2.3411	2.0962	2.1465
1.93209	0.142112	2.31426	0.489793		224	1.7796	1.8611	1.8235	1.7849	1.8737	1.9988	2.0821	2.1623	2.105	1.8499		224	2.0584	2.0744	3.1887	2.1357	2.1141
1.92507	0.139358	2.3728	0.657745		225	1.8828	1.7157	1.7529	1.9031	2.1576	1.9654	2.0217	2.0832	1.9373	1.831		225	1.9476	2.0651	3.5332	2.2516	2.0665
1.90168	0.126427	2.18602	0.189866		226	1.8848	1.6823	1.7654	1.8797	1.927	1.8784	1.9933	2.065	2.0943	1.8466		226	1.8626	2.2969	2.3237	2.2761	2.1708
2.0396	0.226695	2.07058	0.176669		227	1.9077	1.8353	1.8498	1.9588	1.9718	2.5991	2.0637	2.1357	2.1662	1.9079		227	1.874	1.8911	2.2627	2.1535	2.1716
1.97634	0.17165	2.03712	0.0979171		228	1.932	1.8166	1.695	2.0117	1.9561	2.1946	1.9807	2.2981	1.9777	1.9009		228	1.9599	1.9289	2.1053	2.1634	2.0281
1.97781	0.143562	2.04838	0.183234		229	2.0071	1.8517	1.8701	2.0121	2.0236	2.0669	2.1135	2.2281	1.8437	1.7613		229	1.8438	1.9705	2.3405	2.0659	2.0212
1.98074	0.167604	2.06314	0.192481		230	1.8302	1.8239	1.9114	1.8912	2.0778	2.0878	2.1845	2.2677	1.971	1.7619		230	1.8462	1.9772	2.3292	2.1871	1.976
1.96495	0.216064	2.12672	0.249075		231	1.8526	1.7956	1.8088	2.0226	1.7722	2.0991	2.0137	2.4847	1.9869	1.8133		231	1.8147	1.993	2.4572	2.092	2.2767
2.02109	0.242143	2.14132	0.279959		232	2.082	1.7553	2.0156	2.2013	1.8302	1.838	2.2165	2.5297	1.9384	1.8039		232	1.898	1.9043	2.5613	2.0717	2.2713
2.06983	0.320092	2.18262	0.460365		233	2.0191	1.7708	1.8779	1.7888	1.9176	1.9258	2.3179	2.8287	2.2414	2.0103		233	1.9931	1.7683	2.9668	2.1594	2.0255
2.04751	0.244623	2.23496	0.625744		234	2.0635	1.6673	1.8418	1.9592	1.9064	2.4492	1.9822	2.3889	2.239	1.9776		234	1.7876	1.7816	3.2928	2.0356	2.2772
2.09671	0.202009	2.31268	0.721449		235	2.0215	1.9371	1.989	1.8874	1.8916	2.4803	2.02	2.2929	2.31	2.1373		235	1.9483	1.7785	3.5758	2.0995	2.1613
2.00159	0.185282	2.28242	0.63559		236	2.2432	2.1166	1.854	1.7733	1.832	1.845	2.0815	2.2699	2.1263	1.8741		236	1.8882	1.8629	3.3925	2.1987	2.0698
2.01535	0.135514	2.00152	0.200422		237	2.177	1.9587	1.8229	1.8973	1.9721	2.0733	2.206	2.1545	2.0306	1.8611		237	1.8494	1.8381	2.3187	2.0722	1.9292
1.95008	0.110589	1.98116	0.164928		238	1.9756	2.0741	1.7789	1.9301	1.8475	1.8775	2.1198	1.917	2.078	1.9023		238	1.8697	1.8072	2.2142	2.0796	1.9351
1.93093	0.132825	1.97198	0.160609		239	1.8203	1.784	1.7824	1.8629	1.862	2.116	2.0967	2.0413	2.062	1.8817		239	1.8698	1.7659	2.1645	2.0869	1.9728
1.888	0.162508	2.0749	0.229707		240	1.7518	1.658	1.7617	1.9557	1.8786	1.8327	2.1738	2.1088	1.9568	1.8021		240	1.8935	1.8268	2.3929	2.0626	2.1987
1.9105	0.144476	2.21556	0.383703		241	1.8837	1.6848	1.8763	1.9282	2.1223	1.7639	2.1318	2.0167	1.8639	1.8334		241	1.8531	1.9974	2.8416	2.1007	2.285
1.93497	0.154547	2.01816	0.158819		242	1.9221	1.6877	1.8651	1.9362	2.0101	1.7642	2.1399	2.2008	1.9225	1.9011		242	1.8682	1.9719	2.2505	2.1041	1.8961
1.9323	0.121892	2.04574	0.0460001		243	2.0251	1.7639	1.8223	2.0296	1.8811	2.0309	1.9444	2.0013	1.7432	2.0812		243	2.0915	1.9777	2.058	2.023	2.0785
1.92035	0.14405	2.04376	0.110627		244	1.9666	1.692	1.8604	2.1411	1.9122	1.7503	2.0522	2.0892	1.8783	1.8612		244	1.8992	2.0088	2.1706	2.0017	2.1385
1.96754	0.173223	2.20074	0.23698		245	2.1182	1.7249	1.9097	2.1065	1.9137	1.8007	2.32	1.9562	1.9614	1.8641		245	2.0457	1.9325	2.5561	2.2402	2.2292
1.92506	0.150923	2.04836	0.221066		246	1.9682	1.7072	1.8029	2.0971	1.8673	1.7587	2.1838	1.9861	1.8724	2.0069		246	1.8801	1.8652	2.3815	2.1635	1.9515
1.87975	0.135698	2.10584	0.292033		247	1.9004	1.7085	1.7552	1.8652	1.9224	1.695	2.1287	1.9931	1.8551	1.9739		247	2.0139	1.8417	2.6005	2.1022	1.9709
1.90629	0.104399	2.15132	0.191147		248	2.0795	1.7294	1.8518	1.9043	1.9024	1.8482	1.8623	2.0722	1.9285	1.8843		248	2.0478	2.0148	2.4852	2.1258	2.083
1.96889	0.183716	2.10422	0.187063		249	1.9646	1.7194	1.8213	2.257	1.9166	1.7854	1.8632	2.0464	2.0801	2.2349		249	1.863	2.305	2.227	2.1703	1.9558
1.96718	0.197797	2.13588	0.213005		250	1.8548	1.7201	1.825	2.3835	1.939	1.8436	2.0201	1.848	2.1728	2.0649		250	1.8735	2.4124	2.1782	2.2357	1.9796
1.97954	0.240348	2.10862	0.0723939		251	1.8949	1.6887	1.7857	2.4843	1.9153	1.8298	2.231	1.8447	2.1463	1.9747		251	2.1717	2.0729	2.0203	2.1941	2.0841
1.94805	0.145319	2.09746	0.0812718		252	1.8426	1.7405	1.8158	2.1299	1.8536	2.0231	2.1458	2.0237	2.0665	1.839		252	2.0647	2.2007	2.0012	2.0599	2.1608
1.98826	0.148575	2.15902	0.122564		253	1.8422	1.9505	1.8621	2.1913	1.9672	1.8205	2.0962	2.0246	1.8827	2.2453		253	1.9944	2.3028	2.256	2.1234	2.1185
2.07938	0.146539	2.16016	0.0573146		254	1.9656	1.9918	1.9033	2.1145	2.1165	1.8655	2.2123	2.2669	2.0769	2.2805		254	2.0975	2.1631	2.2525	2.1524	2.1353
