# Supplementary material for: Hypoxia controls plasma membrane targeting of polarity proteins by dynamic turnover of PI4P and PI(4,5)P2
Source: eLife. 2022 Jun 9;11:e79582. doi: 10.7554/eLife.79582 (PMC9242647; doi:10.7554/eLife.79582)
Supplement: Figure 3—source data 2. [file elife-79582-fig3-data2.xlsx]

## Sheet: Figure 3A-PLC-PH
Figure 3 Souce Data 2
						1	2	3	4	5	6	7	8	9	10	11	12	13	14			1	2	3	4	5	6	7	8	9	10	11	12	13	14	15
WT		RNAi			WT																RNAi
AVG	STDEV	AVG	STDEV
t_C2_PM/Cy	t_C2_PM/Cy	t_C2_PM/Cy	t_C2_PM/Cy		min	t_C2_PM/Cy	t_C2_PM/Cy	t_C2_PM/Cy	t_C2_PM/Cy	t_C2_PM/Cy	t_C2_PM/Cy	t_C2_PM/Cy	t_C2_PM/Cy	t_C2_PM/Cy	t_C2_PM/Cy	t_C2_PM/Cy	t_C2_PM/Cy	t_C2_PM/Cy	t_C2_PM/Cy		min	t_C2_PM/Cy	t_C2_PM/Cy	t_C2_PM/Cy	t_C2_PM/Cy	t_C2_PM/Cy	t_C2_PM/Cy	t_C2_PM/Cy	t_C2_PM/Cy	t_C2_PM/Cy	t_C2_PM/Cy	t_C2_PM/Cy	t_C2_PM/Cy	t_C2_PM/Cy	t_C2_PM/Cy	t_C2_PM/Cy
0.973271	0.0402582	1.00771	0.0355678		1	1.0678	0.9252	0.9488	0.9737	0.9421	0.9081	0.9913	1.0162	0.9462	0.9644	0.9974	0.9928	0.9808	0.971		1	0.9701	1.0095	1.0783	0.9658	1.041	1.0038	1.0281	0.9919	0.9785	0.9928	0.9485	1.0312	1.0172	1.0577	1.0012
1.01097	0.0217518	1.01505	0.017456		2	0.9956	1.0068	1.0176	1.0015	1.0186	1.058	0.9911	1.0049	1.0003	1.0293	0.9764	1.0137	1.0449	0.9949		2	1.0261	1.0055	0.9879	1.0243	1.0368	1.0108	1.0004	0.9922	1.021	1.0404	1.0177	0.989	1.0172	1.0402	1.0162
1.01577	0.034872	0.977233	0.0358763		3	0.9366	1.068	1.0336	1.0249	1.0394	1.0339	1.0176	0.9789	1.0535	1.0063	1.0262	0.9935	0.9744	1.034		3	1.0038	0.985	0.9337	1.0099	0.9222	0.9854	0.9715	1.0159	1.0005	0.9667	1.0338	0.9798	0.9656	0.9021	0.9826
1.02979	0.0456491	0.940173	0.0753157		4	0.9731	1.0521	1.0036	1.0747	1.0248	0.9731	1.0342	1.0021	1.0703	1.063	1.1057	1.0417	0.9439	1.0548		4	0.8843	0.9733	0.8733	0.9486	0.8361	0.951	0.9591	1.0399	0.9459	0.9093	1.0609	1.028	0.9963	0.7931	0.9035
1.00512	0.0405248	0.890713	0.0913674		5	0.9635	0.9818	1.0527	0.9688	0.9328	0.9854	1.0581	0.9848	1.0042	1.0305	1.0692	1.0424	0.9841	1.0134		5	0.7613	0.9149	0.8691	0.9122	0.8279	0.8811	0.904	0.9182	0.8776	0.8362	0.9207	1.009	1.1316	0.7818	0.8151
0.978257	0.0546508	0.864433	0.105676		6	0.9676	0.986	1.0617	0.8594	0.9511	0.9412	1.0205	0.9353	0.979	1.0126	0.9998	1.019	0.916	1.0464		6	0.7117	0.846	0.8683	0.9234	0.8266	0.8276	0.8392	0.8916	0.8373	0.8101	0.8505	0.8954	1.2032	0.8409	0.7947
0.957293	0.0455027	0.847793	0.114186		7	0.9234	1.0107	0.9858	0.8889	0.9683	0.9317	0.9521	0.923	0.9383	0.9825	0.9669	0.9996	0.8866	1.0443		7	0.6906	0.8128	0.8565	0.9011	0.8052	0.7816	0.8192	0.8988	0.848	0.8005	0.8684	0.8516	1.2104	0.82	0.7522
0.938921	0.0446057	0.819707	0.109126		8	0.8842	0.9772	0.927	0.9076	0.9688	0.9184	0.9311	0.9645	0.8976	0.9829	0.9752	0.9841	0.8427	0.9836		8	0.676	0.8207	0.8309	0.8458	0.7429	0.7575	0.7924	0.8335	0.8338	0.7847	0.8468	0.8758	1.1636	0.7471	0.7441
0.921786	0.0672952	0.788287	0.0896473		9	0.8932	0.9832	0.9063	0.8463	0.9495	0.9066	1.0316	0.9655	0.8645	0.9604	0.9661	0.9563	0.7625	0.913		9	0.7062	0.8156	0.7697	0.816	0.7552	0.7509	0.7968	0.7801	0.7863	0.7299	0.7778	0.8924	1.0529	0.6845	0.71
0.918043	0.0688836	0.75316	0.089937		10	0.9382	1.0071	0.8752	0.824	0.9909	0.9132	0.9822	0.9055	0.8822	0.9519	0.9404	1.0075	0.7874	0.8469		10	0.6805	0.7409	0.7285	0.7877	0.7188	0.7539	0.783	0.7907	0.6925	0.6792	0.7845	0.873	0.9889	0.6576	0.6377
0.913486	0.0707806	0.729667	0.0931614		11	0.9308	1.0293	0.8459	0.842	0.9575	0.9349	0.9382	0.9215	0.8536	0.8955	0.9173	1.0518	0.7942	0.8763		11	0.6323	0.6905	0.7133	0.7746	0.7092	0.7214	0.7268	0.7811	0.6574	0.6647	0.7919	0.8379	0.9767	0.6502	0.617
0.906829	0.0876579	0.708313	0.103802		12	0.8735	1.1053	0.8765	0.8734	0.9307	0.8925	0.9112	0.9016	0.845	0.8233	0.9553	1.066	0.7807	0.8606		12	0.6154	0.7194	0.6632	0.7594	0.6992	0.692	0.6681	0.7008	0.6443	0.6552	0.7891	0.756	1.029	0.6244	0.6092
0.883521	0.0959975	0.692567	0.0953515		13	0.7914	1.1175	0.8879	0.9033	0.8915	0.8455	0.8769	0.8704	0.8368	0.7925	0.9565	1.0189	0.7523	0.8279		13	0.6097	0.7193	0.6282	0.7616	0.6856	0.6884	0.6529	0.6729	0.659	0.6378	0.7491	0.7433	0.9789	0.6073	0.5945
0.856429	0.0786434	0.668393	0.0866579		14	0.7397	1.004	0.8345	0.8602	0.8184	0.8413	0.86	0.8433	0.7995	0.8028	0.936	1.0117	0.7785	0.8601		14	0.5638	0.6671	0.6256	0.7592	0.639	0.6689	0.6285	0.6807	0.6558	0.6193	0.6741	0.7524	0.9121	0.5957	0.5837
0.831107	0.0873469	0.670927	0.112066		15	0.7298	1.0341	0.8652	0.7691	0.7465	0.8303	0.862	0.8098	0.7879	0.771	0.8673	0.9832	0.7699	0.8094		15	0.5477	0.6225	0.6646	0.8491	0.6241	0.6387	0.6405	0.6502	0.6171	0.6192	0.6816	0.7706	0.9708	0.6073	0.5599
0.808364	0.0852778	0.655627	0.107452		16	0.7134	1.0101	0.8634	0.7309	0.7646	0.802	0.8317	0.7759	0.7946	0.7514	0.8321	0.9431	0.7088	0.7951		16	0.5436	0.596	0.6725	0.8232	0.6175	0.6283	0.6432	0.62	0.5626	0.5845	0.7022	0.7533	0.9313	0.5855	0.5707
0.797486	0.0672554	0.63812	0.100248		17	0.7323	0.9382	0.8549	0.7553	0.7966	0.7612	0.7931	0.7778	0.7975	0.7737	0.8259	0.903	0.6743	0.781		17	0.5106	0.5777	0.6714	0.7406	0.6132	0.6166	0.6499	0.5885	0.5628	0.5626	0.7199	0.7394	0.8937	0.5484	0.5765
0.787671	0.0583635	0.63048	0.0958881		18	0.7554	0.91	0.8334	0.7445	0.797	0.739	0.786	0.8013	0.7746	0.7729	0.8579	0.8323	0.6743	0.7488		18	0.5084	0.5728	0.6696	0.6979	0.6173	0.6242	0.6436	0.5913	0.5691	0.5571	0.705	0.7505	0.8681	0.5192	0.5631
0.767843	0.074205	0.617373	0.104798		19	0.7274	0.9139	0.833	0.6771	0.7882	0.727	0.7725	0.7909	0.7479	0.7472	0.8939	0.7732	0.6576	0.7		19	0.5057	0.5658	0.6505	0.6731	0.5708	0.627	0.6141	0.576	0.5429	0.5586	0.7292	0.7414	0.8809	0.4805	0.5441
0.7464	0.0676941	0.603953	0.099681		20	0.6872	0.8681	0.8038	0.6554	0.753	0.709	0.73	0.768	0.7373	0.735	0.8589	0.8021	0.6628	0.679		20	0.5026	0.5753	0.6405	0.6418	0.5461	0.6263	0.5968	0.57	0.5172	0.5478	0.7039	0.7274	0.8524	0.4655	0.5457
0.722393	0.0673698	0.58648	0.0893771		21	0.656	0.8126	0.7816	0.645	0.7385	0.6713	0.6688	0.7793	0.7075	0.7284	0.7736	0.8461	0.6519	0.6529		21	0.4818	0.5446	0.5932	0.6417	0.5366	0.6309	0.5988	0.5505	0.4996	0.5334	0.6519	0.703	0.8073	0.4801	0.5438
0.698793	0.0573091	0.578313	0.0779647		22	0.6201	0.7945	0.7555	0.6346	0.7098	0.6649	0.692	0.7431	0.6684	0.6999	0.7271	0.7902	0.6351	0.6479		22	0.4779	0.52	0.5798	0.6423	0.5555	0.6171	0.5816	0.5934	0.4984	0.5153	0.6308	0.6824	0.7568	0.4947	0.5287
0.68635	0.0437639	0.579493	0.0807614		23	0.6302	0.7355	0.7182	0.6211	0.7221	0.675	0.7377	0.7046	0.6728	0.6714	0.7416	0.7067	0.6168	0.6552		23	0.4689	0.5171	0.5772	0.6305	0.5553	0.6052	0.5765	0.593	0.5108	0.521	0.6544	0.6955	0.7645	0.4972	0.5253
0.6787	0.0455919	0.582467	0.095092		24	0.6224	0.676	0.7085	0.6263	0.7184	0.6746	0.7464	0.693	0.6603	0.6993	0.7518	0.689	0.6073	0.6285		24	0.4743	0.4967	0.5846	0.6104	0.5648	0.5998	0.5837	0.5387	0.5226	0.5248	0.6592	0.7529	0.8081	0.4934	0.523
0.662964	0.0508493	0.573547	0.0929998		25	0.5947	0.6454	0.7216	0.6393	0.6783	0.6432	0.699	0.698	0.6258	0.6786	0.7716	0.6807	0.5872	0.6181		25	0.4842	0.4851	0.583	0.5688	0.5549	0.6006	0.5918	0.528	0.5052	0.5221	0.6539	0.7641	0.7693	0.4708	0.5214
0.648957	0.0585964	0.570713	0.0957077		26	0.5598	0.62	0.7349	0.6245	0.6483	0.6228	0.6726	0.6956	0.6267	0.6638	0.7626	0.6829	0.5572	0.6137		26	0.4783	0.482	0.5755	0.5613	0.5473	0.605	0.6056	0.5478	0.4791	0.5244	0.6508	0.7612	0.7688	0.4577	0.5159
0.646171	0.0512812	0.568687	0.0948806		27	0.5659	0.6349	0.7224	0.6143	0.6596	0.635	0.6747	0.6894	0.6211	0.6581	0.7298	0.6805	0.5705	0.5902		27	0.4671	0.4962	0.5815	0.5685	0.5445	0.607	0.6094	0.5434	0.4647	0.5214	0.6428	0.7392	0.7745	0.4536	0.5165
0.631986	0.0484926	0.554613	0.0824141		28	0.5778	0.6562	0.6895	0.5715	0.6472	0.6334	0.6766	0.6826	0.588	0.6006	0.696	0.6765	0.5731	0.5788		28	0.4534	0.4903	0.5524	0.5812	0.5426	0.6078	0.5976	0.524	0.4662	0.5208	0.5827	0.6975	0.7334	0.4506	0.5187
0.628286	0.0491767	0.555393	0.0808048		29	0.6023	0.6752	0.688	0.5672	0.6112	0.6093	0.6595	0.6601	0.5766	0.5923	0.6866	0.7088	0.5813	0.5776		29	0.4595	0.4956	0.5574	0.5798	0.5382	0.6212	0.6083	0.5297	0.4665	0.5125	0.5679	0.6814	0.7346	0.4486	0.5297
0.622271	0.0462085	0.56168	0.0840449		30	0.6007	0.6961	0.6979	0.5863	0.5937	0.5928	0.6446	0.6473	0.5855	0.5879	0.6728	0.663	0.5799	0.5633		30	0.4587	0.4951	0.5665	0.5978	0.5313	0.611	0.5935	0.5536	0.4681	0.5149	0.612	0.6897	0.7484	0.4491	0.5355
0.620386	0.0429101	0.56618	0.0913465		31	0.5746	0.7045	0.6738	0.5795	0.5983	0.5799	0.6653	0.6394	0.6037	0.589	0.6712	0.6203	0.6068	0.5791		31	0.4544	0.4978	0.5825	0.5821	0.5262	0.6043	0.584	0.5509	0.4643	0.516	0.6211	0.7136	0.7842	0.4668	0.5445
0.614679	0.0396766	0.56442	0.0918968		32	0.5477	0.6765	0.6584	0.5614	0.5993	0.595	0.6696	0.6367	0.5863	0.5841	0.6491	0.6291	0.6049	0.6074		32	0.4457	0.4937	0.5853	0.5847	0.5269	0.6001	0.588	0.5336	0.4635	0.5207	0.6257	0.7306	0.7663	0.471	0.5305
0.609721	0.0438025	0.55936	0.0909043		33	0.5426	0.677	0.6703	0.5537	0.598	0.5954	0.6472	0.6542	0.5688	0.5816	0.6407	0.6318	0.5721	0.6027		33	0.4433	0.4876	0.5672	0.5596	0.5363	0.617	0.6014	0.5274	0.4532	0.5155	0.6125	0.7115	0.7638	0.4684	0.5257
0.596807	0.042701	0.559007	0.0914598		34	0.5462	0.6101	0.6654	0.5597	0.5944	0.5725	0.6404	0.6625	0.5551	0.5764	0.6428	0.618	0.5544	0.5574		34	0.4436	0.4894	0.5398	0.5436	0.5397	0.6382	0.6098	0.5317	0.4506	0.5118	0.6007	0.694	0.7709	0.4614	0.5599
0.589564	0.0418955	0.550647	0.0855799		35	0.5488	0.5763	0.6548	0.545	0.5854	0.5552	0.6451	0.6381	0.5532	0.5825	0.6515	0.6095	0.5537	0.5548		35	0.4529	0.4893	0.5212	0.5434	0.5246	0.6565	0.6072	0.5265	0.4515	0.511	0.5822	0.6769	0.7301	0.4408	0.5456
0.577186	0.0475657	0.546873	0.0795629		36	0.5027	0.5883	0.6586	0.5149	0.5679	0.5449	0.6206	0.6106	0.5414	0.5877	0.6467	0.605	0.5533	0.538		36	0.4542	0.4811	0.5118	0.568	0.5255	0.6351	0.5903	0.5352	0.4507	0.511	0.5737	0.6752	0.7088	0.4486	0.5339
0.571729	0.0470256	0.546473	0.081741		37	0.4918	0.5985	0.6566	0.4977	0.5619	0.5407	0.5811	0.5917	0.5481	0.5831	0.6314	0.6183	0.5614	0.5419		37	0.4421	0.4728	0.5234	0.5673	0.526	0.6284	0.5897	0.5645	0.4412	0.5125	0.563	0.6853	0.7055	0.4493	0.5261
0.564486	0.0445229	0.547587	0.0853752		38	0.4837	0.6159	0.6447	0.5028	0.5657	0.5382	0.5614	0.5776	0.5514	0.554	0.6137	0.6069	0.5503	0.5365		38	0.4393	0.4699	0.5315	0.5649	0.5183	0.6135	0.5949	0.5525	0.438	0.5101	0.5795	0.6956	0.7238	0.4559	0.5261
0.555021	0.0451914	0.547967	0.0813286		39	0.4767	0.6187	0.6379	0.496	0.5652	0.5286	0.5587	0.5766	0.547	0.5269	0.6056	0.5637	0.5482	0.5205		39	0.4424	0.4758	0.526	0.5598	0.5379	0.6123	0.6039	0.532	0.4464	0.5161	0.5949	0.6901	0.7026	0.4475	0.5318
0.549721	0.0447296	0.548433	0.081198		40	0.4908	0.5881	0.6307	0.4971	0.5462	0.5105	0.5643	0.5928	0.5201	0.5232	0.6249	0.55	0.5299	0.5275		40	0.441	0.478	0.5234	0.5635	0.5374	0.6146	0.5936	0.522	0.4487	0.533	0.5821	0.6893	0.7068	0.4414	0.5517
0.556571	0.0424502	0.551313	0.0823636		41	0.4936	0.5701	0.6385	0.5219	0.5444	0.5252	0.5754	0.6075	0.5357	0.528	0.6264	0.5547	0.5464	0.5242		41	0.4438	0.4779	0.5334	0.5633	0.5286	0.6238	0.588	0.5367	0.4504	0.5353	0.5735	0.7015	0.71	0.4441	0.5594
0.551393	0.0364941	0.550733	0.0832374		42	0.484	0.5774	0.6273	0.5192	0.5479	0.5496	0.5673	0.602	0.5296	0.5304	0.5692	0.5529	0.546	0.5167		42	0.4454	0.485	0.5245	0.5518	0.5226	0.6171	0.6033	0.5424	0.456	0.5254	0.567	0.7009	0.719	0.441	0.5596
0.543536	0.0389675	0.54908	0.0818758		43	0.4753	0.5808	0.6272	0.5032	0.5405	0.5493	0.5464	0.5937	0.5274	0.5148	0.5297	0.5664	0.5369	0.5179		43	0.4481	0.486	0.5221	0.5437	0.5261	0.6142	0.6135	0.5216	0.4635	0.5297	0.5588	0.6892	0.7226	0.4411	0.556
0.541193	0.037775	0.55576	0.0814597		44	0.4838	0.5809	0.6338	0.5046	0.5416	0.5271	0.5504	0.5788	0.5237	0.5047	0.5392	0.551	0.5307	0.5264		44	0.4495	0.4909	0.5311	0.5552	0.5388	0.627	0.6007	0.5377	0.4673	0.5339	0.5672	0.7147	0.7163	0.458	0.5481
0.539586	0.0412943	0.555833	0.0873898		45	0.4701	0.5727	0.6495	0.5133	0.5415	0.5327	0.5491	0.5684	0.5139	0.5053	0.5502	0.5407	0.5198	0.527		45	0.456	0.4745	0.5412	0.5641	0.5398	0.6159	0.5974	0.5371	0.4692	0.5211	0.5887	0.7185	0.7412	0.4425	0.5303
0.538707	0.0415535	0.54916	0.0824694		46	0.4609	0.5516	0.6472	0.5106	0.5399	0.5194	0.551	0.5745	0.5081	0.5359	0.5548	0.5448	0.5175	0.5257		46	0.4553	0.469	0.5168	0.5485	0.5313	0.6084	0.6003	0.525	0.4555	0.5234	0.6147	0.6976	0.7024	0.4367	0.5525
0.539464	0.0456048	0.554993	0.0850685		47	0.4663	0.5566	0.6646	0.5073	0.5251	0.5122	0.5474	0.5797	0.5176	0.5344	0.5628	0.5399	0.5294	0.5092		47	0.4555	0.4732	0.5274	0.5616	0.55	0.6339	0.5939	0.5177	0.447	0.5323	0.6263	0.6788	0.7239	0.4386	0.5648
0.539229	0.0461413	0.55356	0.0840599		48	0.4677	0.5444	0.6628	0.5084	0.5282	0.5179	0.5538	0.596	0.5209	0.529	0.5555	0.527	0.5363	0.5013		48	0.4534	0.4777	0.5424	0.5669	0.5517	0.6464	0.5947	0.5162	0.4427	0.5249	0.6084	0.6701	0.7211	0.4381	0.5487
0.53345	0.0439123	0.548253	0.0837078		49	0.4805	0.5339	0.6392	0.4943	0.5361	0.5237	0.5347	0.6123	0.5152	0.4972	0.5534	0.5247	0.5201	0.503		49	0.4481	0.4702	0.5459	0.5449	0.561	0.6183	0.5851	0.5117	0.4421	0.5212	0.5934	0.6902	0.7135	0.4357	0.5425
0.531636	0.0413456	0.547907	0.0818561		50	0.4776	0.5433	0.6185	0.4949	0.5468	0.5161	0.5241	0.6143	0.5048	0.5002	0.5526	0.5205	0.52	0.5092		50	0.4451	0.4683	0.5158	0.5462	0.5598	0.6079	0.5871	0.5231	0.4439	0.5365	0.5876	0.6946	0.7043	0.4412	0.5572
0.527129	0.042373	0.54742	0.0835281		51	0.4664	0.5433	0.6286	0.4867	0.5465	0.5067	0.53	0.5909	0.504	0.4922	0.5424	0.5201	0.5152	0.5068		51	0.4474	0.4745	0.497	0.553	0.5558	0.6073	0.5963	0.521	0.4416	0.5371	0.5812	0.7004	0.7121	0.4474	0.5392
0.5319	0.0445093	0.549967	0.0884848		52	0.4603	0.5591	0.6407	0.4909	0.5322	0.52	0.5527	0.5733	0.5019	0.4875	0.5554	0.5411	0.5208	0.5107		52	0.4498	0.4678	0.5125	0.5612	0.5467	0.6133	0.6018	0.5201	0.4398	0.5307	0.5715	0.6957	0.7477	0.4483	0.5426
0.532436	0.0468081	0.548227	0.0859989		53	0.4676	0.5445	0.6541	0.4947	0.5375	0.5152	0.5494	0.5595	0.4959	0.485	0.5836	0.5265	0.5243	0.5163		53	0.4475	0.4745	0.5359	0.5653	0.5228	0.6023	0.6103	0.5071	0.4401	0.5298	0.564	0.6975	0.7267	0.4394	0.5602
0.532421	0.0480181	0.54964	0.0879158		54	0.4691	0.5287	0.6326	0.4906	0.54	0.5202	0.5343	0.5652	0.5058	0.4713	0.6224	0.515	0.5324	0.5263		54	0.447	0.4741	0.5292	0.5491	0.536	0.5914	0.6207	0.5265	0.4402	0.5363	0.5655	0.7281	0.7126	0.4347	0.5532
0.525393	0.0393758	0.548467	0.0886667		55	0.4661	0.5269	0.6112	0.4927	0.534	0.5372	0.5125	0.5814	0.5029	0.4804	0.5652	0.507	0.5278	0.5102		55	0.4443	0.4759	0.5364	0.5329	0.5316	0.585	0.608	0.5296	0.4404	0.5318	0.5847	0.7361	0.7165	0.4436	0.5302
0.520214	0.038439	0.555873	0.0905259		56	0.4728	0.5348	0.6035	0.4883	0.5269	0.5381	0.5183	0.5926	0.4915	0.4836	0.5207	0.4967	0.5162	0.499		56	0.4485	0.471	0.5406	0.5581	0.5361	0.6033	0.6062	0.5299	0.4449	0.5512	0.5897	0.7424	0.7269	0.4452	0.5441
0.524207	0.0374723	0.553327	0.0868583		57	0.4794	0.5332	0.6084	0.4838	0.5273	0.5276	0.5275	0.5973	0.501	0.498	0.5278	0.5029	0.5193	0.5054		57	0.4535	0.4696	0.5282	0.5374	0.5484	0.6044	0.604	0.5188	0.4516	0.5475	0.5818	0.7203	0.7293	0.447	0.5581
0.526993	0.0395148	0.54886	0.0828795		58	0.467	0.5416	0.6131	0.4855	0.5307	0.522	0.5327	0.5927	0.5061	0.4908	0.5448	0.5068	0.5369	0.5072		58	0.4579	0.4782	0.5239	0.5385	0.5462	0.6028	0.6112	0.5158	0.4469	0.5436	0.5669	0.6923	0.7249	0.4396	0.5442
0.527707	0.039985	0.547467	0.0824376		59	0.4732	0.5473	0.6169	0.4865	0.544	0.5343	0.5203	0.5843	0.5045	0.4816	0.5442	0.503	0.5417	0.5061		59	0.4569	0.4827	0.5237	0.5515	0.519	0.6067	0.6214	0.5288	0.4435	0.5274	0.5751	0.702	0.7017	0.4369	0.5347
0.529229	0.0404235	0.549633	0.0837712		60	0.4761	0.5357	0.6245	0.4819	0.5453	0.5429	0.5165	0.5815	0.5024	0.4812	0.5487	0.5118	0.5326	0.5281		60	0.4522	0.4781	0.5402	0.5416	0.5131	0.5998	0.646	0.525	0.4443	0.5271	0.5952	0.701	0.6978	0.4444	0.5387
0.528407	0.0414759	0.554493	0.0885676		61	0.4717	0.515	0.6375	0.4819	0.5389	0.547	0.5147	0.5766	0.5127	0.4942	0.5344	0.5188	0.5132	0.5411		61	0.4483	0.4795	0.5422	0.5366	0.5239	0.5946	0.6347	0.5174	0.4564	0.5371	0.6241	0.7004	0.7343	0.4375	0.5504
0.524307	0.0442389	0.550473	0.0868509		62	0.463	0.5226	0.6492	0.4836	0.5314	0.5388	0.5148	0.561	0.521	0.4843	0.5105	0.5052	0.511	0.5439		62	0.4459	0.4849	0.5284	0.5421	0.5205	0.5866	0.6319	0.532	0.4438	0.5394	0.6146	0.6773	0.7391	0.436	0.5346
0.5235	0.0408102	0.54554	0.0826823		63	0.4644	0.537	0.6351	0.5074	0.5421	0.5143	0.5113	0.5698	0.5027	0.4881	0.5246	0.4989	0.5079	0.5254		63	0.4465	0.507	0.5094	0.5395	0.5151	0.5821	0.6288	0.5389	0.4456	0.5347	0.5643	0.6797	0.7297	0.4415	0.5203
0.525236	0.04483	0.54454	0.0810651		64	0.4671	0.5434	0.6315	0.4933	0.5498	0.5311	0.5131	0.5916	0.4928	0.4742	0.5389	0.5044	0.5219	0.5002		64	0.4473	0.4988	0.5122	0.5448	0.5176	0.579	0.6249	0.5394	0.4446	0.5318	0.5573	0.6844	0.7175	0.4398	0.5287
0.527079	0.0423853	0.54768	0.0820494		65	0.4683	0.5406	0.6243	0.485	0.535	0.5395	0.5273	0.5889	0.5	0.4796	0.5466	0.5093	0.5344	0.5003		65	0.4518	0.4789	0.5137	0.5518	0.5219	0.5752	0.6287	0.5353	0.4522	0.5382	0.5852	0.6933	0.7113	0.4364	0.5413
0.526371	0.0382538	0.549353	0.0842848		66	0.4702	0.5283	0.6152	0.4859	0.5327	0.5391	0.5178	0.5897	0.5031	0.4936	0.5342	0.5291	0.5227	0.5076		66	0.4541	0.4781	0.5166	0.543	0.5287	0.5778	0.6111	0.5436	0.4418	0.531	0.5807	0.7143	0.7142	0.4415	0.5638
0.525907	0.0414418	0.5486	0.0828011		67	0.4713	0.5223	0.6192	0.4897	0.5424	0.5549	0.5163	0.5997	0.5049	0.4905	0.5256	0.5094	0.5144	0.5021		67	0.4511	0.4958	0.5142	0.5371	0.5299	0.5839	0.6193	0.5209	0.4396	0.5324	0.5542	0.7127	0.7069	0.4497	0.5813
0.528807	0.042985	0.55132	0.0826906		68	0.4648	0.553	0.625	0.4997	0.5542	0.5385	0.5203	0.5963	0.5078	0.487	0.5379	0.5008	0.5129	0.5051		68	0.4506	0.4888	0.5253	0.5447	0.5338	0.5889	0.6455	0.5296	0.4518	0.5368	0.5655	0.7036	0.7066	0.4407	0.5576
0.529329	0.0434313	0.551727	0.0820934		69	0.4695	0.5457	0.6304	0.4867	0.5443	0.5264	0.5296	0.6037	0.5056	0.5002	0.5285	0.508	0.5341	0.4979		69	0.4542	0.491	0.5317	0.5534	0.5408	0.5899	0.6617	0.5262	0.4447	0.5414	0.557	0.6756	0.716	0.4399	0.5524
0.527357	0.0453485	0.552153	0.082386		70	0.4649	0.5326	0.6282	0.4809	0.5335	0.5325	0.5202	0.6117	0.509	0.4812	0.5402	0.5057	0.5272	0.5152		70	0.4636	0.4976	0.506	0.5607	0.5463	0.6182	0.65	0.5255	0.4427	0.5218	0.5568	0.683	0.7039	0.4344	0.5718
0.526821	0.0435853	0.551967	0.0817216		71	0.4664	0.5275	0.6147	0.4852	0.5295	0.5376	0.5246	0.6193	0.5078	0.493	0.5365	0.4927	0.5259	0.5148		71	0.4629	0.4946	0.5079	0.5364	0.5356	0.6061	0.6335	0.53	0.4478	0.5105	0.578	0.6839	0.7209	0.4527	0.5787
0.52735	0.0448754	0.548993	0.0806412		72	0.463	0.5238	0.6224	0.4886	0.5393	0.5367	0.542	0.6186	0.5031	0.4948	0.5237	0.507	0.5143	0.5056		72	0.4607	0.4837	0.5162	0.5428	0.5244	0.6007	0.6168	0.5281	0.4451	0.5274	0.599	0.6929	0.7065	0.4478	0.5428
0.52345	0.0473112	0.550553	0.0781524		73	0.4616	0.5203	0.6261	0.4918	0.533	0.5205	0.5416	0.6173	0.5083	0.4713	0.531	0.498	0.5091	0.4984		73	0.4728	0.4843	0.5387	0.5532	0.5272	0.6023	0.5968	0.5202	0.4414	0.5562	0.5666	0.6809	0.7243	0.4551	0.5383
0.523186	0.0445251	0.55248	0.0765173		74	0.466	0.5171	0.6296	0.4887	0.5282	0.5107	0.5298	0.6026	0.5135	0.4798	0.5393	0.4928	0.5189	0.5076		74	0.4782	0.4972	0.5311	0.5534	0.5351	0.5984	0.5923	0.5293	0.4439	0.5477	0.5612	0.6855	0.7204	0.45	0.5635
0.523071	0.0407271	0.550267	0.0776707		75	0.4798	0.5169	0.6255	0.5015	0.527	0.5175	0.5176	0.5944	0.5134	0.4899	0.5385	0.4936	0.5192	0.4882		75	0.4672	0.4932	0.5168	0.5696	0.5341	0.5664	0.5914	0.5314	0.4488	0.5285	0.5867	0.7107	0.6931	0.4431	0.573
0.521393	0.0406147	0.548973	0.0767233		76	0.4824	0.5106	0.6259	0.5014	0.5267	0.5173	0.5198	0.5852	0.5012	0.4783	0.5433	0.4983	0.5207	0.4884		76	0.4576	0.4874	0.5178	0.5671	0.536	0.57	0.5942	0.5209	0.4467	0.5419	0.5751	0.6986	0.698	0.4527	0.5706
0.521379	0.0432508	0.555567	0.0791828		77	0.4734	0.5122	0.6285	0.481	0.5236	0.5127	0.5244	0.5961	0.5038	0.4716	0.5181	0.5285	0.5215	0.5039		77	0.4695	0.4922	0.5246	0.581	0.5475	0.5649	0.6113	0.5313	0.4446	0.5618	0.5652	0.7101	0.7113	0.4543	0.5639
0.520321	0.0402338	0.55158	0.0790849		78	0.4719	0.5169	0.617	0.4845	0.5325	0.5073	0.5222	0.5915	0.5113	0.4802	0.5094	0.5297	0.5174	0.4927		78	0.4588	0.4949	0.5236	0.5777	0.5326	0.5614	0.6184	0.5377	0.4354	0.5401	0.5747	0.6951	0.7117	0.458	0.5536
0.521764	0.0434279	0.54658	0.0769189		79	0.4732	0.5299	0.6307	0.4993	0.526	0.5028	0.5084	0.5948	0.5151	0.4819	0.5042	0.536	0.5217	0.4807		79	0.455	0.495	0.5285	0.5713	0.5381	0.5636	0.61	0.5364	0.4394	0.5263	0.5722	0.6661	0.717	0.4449	0.5349
0.5217	0.0465393	0.54688	0.0769163		80	0.4793	0.5275	0.6383	0.492	0.523	0.4947	0.5175	0.5957	0.4989	0.4743	0.511	0.5482	0.5266	0.4768		80	0.4582	0.4883	0.5445	0.5518	0.5544	0.5584	0.5986	0.5215	0.438	0.5383	0.5734	0.6637	0.7229	0.4433	0.5479
0.531607	0.0508083	0.54888	0.0836513		81	0.4788	0.5367	0.6453	0.4801	0.5322	0.5	0.531	0.5974	0.4924	0.4851	0.5209	0.5835	0.5703	0.4888		81	0.4591	0.4884	0.5021	0.5557	0.5576	0.5794	0.6144	0.5267	0.4374	0.5326	0.564	0.6791	0.7394	0.4395	0.5578
0.547643	0.0621382	0.552047	0.0862663		82	0.4804	0.5502	0.6742	0.4814	0.5339	0.5134	0.5399	0.6315	0.5128	0.4886	0.5331	0.6305	0.5987	0.4984		82	0.4572	0.483	0.4906	0.5673	0.5539	0.5803	0.6429	0.5318	0.4413	0.5369	0.5861	0.7124	0.7116	0.4423	0.5431
0.55895	0.0757114	0.551833	0.0841834		83	0.4669	0.594	0.7121	0.4821	0.5451	0.5223	0.542	0.6566	0.5251	0.4858	0.5121	0.6605	0.6108	0.5099		83	0.4612	0.4849	0.5164	0.5876	0.5338	0.5773	0.6287	0.5211	0.4415	0.5129	0.6046	0.6895	0.7192	0.4393	0.5595
0.5698	0.0871934	0.546547	0.0795141		84	0.4698	0.6589	0.7152	0.4837	0.5358	0.5234	0.5503	0.6783	0.5203	0.4865	0.5138	0.6974	0.6354	0.5084		84	0.457	0.4768	0.5176	0.5656	0.5627	0.5724	0.6099	0.5108	0.4376	0.5141	0.5877	0.6789	0.7045	0.442	0.5606
0.5882	0.100873	0.547213	0.0788299		85	0.4737	0.7012	0.7455	0.4843	0.527	0.5282	0.5646	0.7095	0.5199	0.4955	0.5417	0.7467	0.6597	0.5373		85	0.4643	0.4758	0.5263	0.5489	0.5548	0.568	0.6039	0.5135	0.4444	0.5299	0.5773	0.6879	0.7157	0.4483	0.5492
0.612529	0.11678	0.55036	0.0790201		86	0.475	0.7542	0.7574	0.4812	0.5305	0.5838	0.5594	0.7484	0.5504	0.5016	0.5657	0.8338	0.661	0.573		86	0.4886	0.4821	0.5289	0.5328	0.5493	0.575	0.6075	0.5176	0.451	0.5275	0.5796	0.6885	0.7273	0.4429	0.5568
0.64005	0.135041	0.552967	0.0797888		87	0.4769	0.807	0.7645	0.4882	0.5512	0.6682	0.5681	0.7691	0.5702	0.5039	0.6146	0.9355	0.6489	0.5944		87	0.4843	0.4931	0.5115	0.5428	0.5688	0.5811	0.5986	0.5203	0.4501	0.5414	0.6031	0.6929	0.7265	0.4455	0.5345
0.664	0.152071	0.5568	0.0868004		88	0.4754	0.899	0.8111	0.486	0.5673	0.6686	0.606	0.7745	0.5535	0.542	0.6417	0.9848	0.6527	0.6334		88	0.4705	0.4822	0.5258	0.5476	0.5877	0.5776	0.5919	0.5312	0.4443	0.5372	0.6012	0.7089	0.7488	0.4422	0.5549
0.696586	0.169089	0.55692	0.082971		89	0.495	1.0869	0.827	0.5279	0.5536	0.7392	0.6383	0.7821	0.5593	0.5652	0.7099	0.9445	0.6679	0.6554		89	0.4551	0.5054	0.5396	0.5436	0.563	0.5652	0.607	0.5326	0.4466	0.5236	0.5907	0.6872	0.7536	0.4615	0.5791
0.729164	0.181101	0.555613	0.0805665		90	0.5269	1.1767	0.8446	0.5937	0.5565	0.7842	0.6688	0.7667	0.5875	0.5554	0.8165	0.961	0.6895	0.6803		90	0.4626	0.4942	0.5456	0.5754	0.5545	0.5726	0.5961	0.5311	0.4479	0.5266	0.5805	0.6899	0.7398	0.4539	0.5635
0.745	0.16735	0.554587	0.0803035		91	0.5532	1.1226	0.8902	0.6183	0.5657	0.8182	0.668	0.7818	0.627	0.6077	0.9037	0.9291	0.6591	0.6854		91	0.4616	0.4765	0.543	0.5755	0.5519	0.5875	0.611	0.5178	0.4502	0.5344	0.5772	0.6891	0.7325	0.4671	0.5435
0.751157	0.154167	0.556693	0.0820897		92	0.5902	1.0783	0.8702	0.6684	0.5647	0.7893	0.645	0.8274	0.6114	0.655	0.9701	0.8778	0.6856	0.6828		92	0.4607	0.4952	0.5391	0.5603	0.558	0.5937	0.6054	0.5203	0.4493	0.5287	0.6009	0.6923	0.7336	0.4475	0.5654
0.770436	0.142898	0.55236	0.0782901		93	0.6602	1.0562	0.8708	0.7033	0.5959	0.7911	0.6473	0.8055	0.6045	0.7022	0.9907	0.9177	0.7548	0.6859		93	0.463	0.5002	0.5123	0.5573	0.5447	0.5771	0.6192	0.514	0.454	0.5309	0.5754	0.679	0.7237	0.4527	0.5819
0.792164	0.161313	0.557607	0.0844639		94	0.6864	1.1535	0.9177	0.6982	0.6707	0.8484	0.6919	0.7711	0.6072	0.6575	0.9633	1.0084	0.7301	0.6859		94	0.474	0.4917	0.5078	0.5452	0.5611	0.5821	0.6352	0.5275	0.4605	0.5362	0.5785	0.6953	0.7477	0.4453	0.576
0.797671	0.167635	0.559213	0.0859258		95	0.6999	1.1648	0.876	0.6851	0.6328	0.8054	0.7377	0.7605	0.618	0.6653	1.0205	1.0439	0.7422	0.7153		95	0.4718	0.4837	0.5091	0.5564	0.5831	0.5791	0.6087	0.5484	0.4484	0.5381	0.5587	0.7093	0.7569	0.4622	0.5743
0.802757	0.14646	0.559067	0.0784694		96	0.7755	1.0451	0.9007	0.7165	0.6667	0.786	0.7179	0.7554	0.625	0.6768	1.0381	1.054	0.7267	0.7542		96	0.4799	0.4791	0.5287	0.5582	0.5807	0.5754	0.6277	0.5349	0.4482	0.5613	0.593	0.6978	0.7103	0.4541	0.5567
0.798243	0.135131	0.562367	0.0759209		97	0.7308	1.0228	0.9009	0.721	0.6859	0.8038	0.7048	0.7782	0.6518	0.6722	1.0174	1.0197	0.7084	0.7577		97	0.4925	0.4854	0.5584	0.5632	0.5526	0.5716	0.6255	0.5334	0.4497	0.5645	0.6024	0.6909	0.7222	0.4707	0.5525
0.820379	0.153874	0.55646	0.0795149		98	0.7388	1.1184	0.9088	0.6796	0.6906	0.8374	0.7323	0.8039	0.6434	0.6754	1.0001	1.0871	0.8094	0.7601		98	0.4762	0.495	0.5408	0.5461	0.5552	0.5819	0.6053	0.5268	0.4494	0.539	0.5819	0.6963	0.7313	0.4503	0.5714
0.821957	0.139629	0.551027	0.0789791		99	0.7321	1.0816	0.9023	0.6476	0.6955	0.8647	0.8074	0.8123	0.6449	0.6909	1.0305	0.9937	0.8203	0.7836		99	0.4723	0.4803	0.5188	0.5523	0.5421	0.576	0.6027	0.5274	0.4559	0.5303	0.5602	0.6785	0.7402	0.4557	0.5727
0.823557	0.149994	0.558073	0.0812159		100	0.7633	1.075	0.8685	0.6094	0.7038	0.8612	0.7848	0.8373	0.6594	0.755	1.1446	0.953	0.7537	0.7608		100	0.4868	0.4805	0.5199	0.541	0.5569	0.5759	0.6198	0.5255	0.4898	0.531	0.5851	0.7034	0.7481	0.4535	0.5539
0.823207	0.155138	0.564673	0.079538		101	0.7072	1.1887	0.8814	0.6143	0.6969	0.8618	0.7936	0.8264	0.6823	0.7373	1.0337	0.9691	0.7899	0.7423		101	0.4875	0.4807	0.5307	0.5553	0.5712	0.5954	0.6136	0.5395	0.4925	0.5194	0.6058	0.6972	0.7439	0.4577	0.5797
0.860629	0.175163	0.562407	0.0804671		102	0.7635	1.2735	0.9175	0.6909	0.7094	0.8913	0.8827	0.8073	0.708	0.7359	1.0831	1.0769	0.7868	0.722		102	0.4635	0.4839	0.5498	0.5514	0.5753	0.5936	0.6123	0.551	0.4719	0.5316	0.6103	0.702	0.726	0.4485	0.565
0.851493	0.160076	0.559067	0.0808111		103	0.7866	1.1221	0.9446	0.7329	0.6974	0.9052	0.8532	0.8299	0.6641	0.7384	1.1405	1.0555	0.7467	0.7038		103	0.4621	0.4822	0.5372	0.5514	0.5565	0.5816	0.6063	0.5514	0.4552	0.5442	0.608	0.7075	0.7208	0.4537	0.5679
0.8593	0.154429	0.557173	0.0803218		104	0.8116	1.1007	0.98	0.6993	0.7124	0.8686	0.8092	0.8274	0.6964	0.8083	1.1536	1.0676	0.7487	0.7464		104	0.472	0.4852	0.5279	0.5541	0.5397	0.5847	0.6099	0.5525	0.4564	0.5264	0.607	0.7048	0.7278	0.465	0.5442
0.852329	0.152218	0.561933	0.0887022		105	0.8298	1.1193	0.9513	0.6567	0.7427	0.797	0.775	0.8166	0.6862	0.8739	1.0751	1.0985	0.7245	0.786		105	0.4732	0.4747	0.5369	0.5615	0.539	0.5868	0.6252	0.5459	0.4585	0.5379	0.6155	0.7368	0.7434	0.4614	0.5323
0.852543	0.146124	0.5616	0.0885743		106	0.7982	1.1101	0.892	0.6452	0.7803	0.8009	0.8116	0.869	0.6587	0.8941	1.1155	1.0271	0.7573	0.7756		106	0.479	0.4796	0.5319	0.5656	0.549	0.5742	0.6191	0.5369	0.4646	0.5431	0.6144	0.7539	0.7312	0.4531	0.5284
0.86885	0.174604	0.56706	0.0952277		107	0.8101	1.2977	0.9125	0.6411	0.7541	0.8447	0.8061	0.8337	0.6945	0.8314	1.1522	0.9885	0.7999	0.7974		107	0.4713	0.5003	0.5331	0.5576	0.5587	0.5751	0.6192	0.5365	0.4709	0.536	0.6052	0.7824	0.7616	0.4593	0.5387
0.885071	0.181167	0.584247	0.0976539		108	0.7989	1.2984	0.892	0.6231	0.7665	0.904	0.8083	0.8219	0.7225	0.8492	1.1973	1.0408	0.8144	0.8537		108	0.4853	0.518	0.5759	0.5614	0.5484	0.6106	0.6162	0.5402	0.4894	0.5579	0.6352	0.7966	0.7855	0.4581	0.585
0.859736	0.145209	0.58754	0.0884128		109	0.804	1.1576	0.8862	0.6118	0.7656	0.8397	0.8239	0.8935	0.7179	0.8645	1.0793	1.0213	0.7471	0.8239		109	0.4922	0.528	0.5925	0.5619	0.5753	0.61	0.6016	0.5425	0.5062	0.5738	0.6521	0.7661	0.7703	0.4573	0.5833
0.8631	0.1662	0.589007	0.0797587		110	0.8587	1.1762	0.9741	0.6511	0.7543	0.83	0.8378	0.9028	0.6894	0.7799	1.1619	1.0171	0.7106	0.7395		110	0.4872	0.5373	0.6239	0.5512	0.5987	0.6197	0.6255	0.5421	0.5093	0.5591	0.6346	0.7137	0.7674	0.479	0.5864
0.853457	0.177599	0.586553	0.0816289		111	0.8416	1.2044	0.9763	0.6041	0.7542	0.8562	0.8096	0.86	0.6952	0.6891	1.1861	0.9697	0.7367	0.7652		111	0.4816	0.5321	0.6508	0.5426	0.5844	0.6218	0.6348	0.5395	0.5272	0.534	0.6181	0.7179	0.7623	0.4776	0.5736
0.843871	0.154371	0.58562	0.0778616		112	0.7604	1.2119	0.994	0.6115	0.7826	0.8285	0.8303	0.8219	0.7626	0.7083	1.0689	0.8597	0.7432	0.8304		112	0.4631	0.525	0.6327	0.5565	0.5976	0.6137	0.6319	0.5595	0.5347	0.5343	0.6272	0.7074	0.7424	0.4716	0.5867
0.823964	0.129343	0.58758	0.0734223		113	0.76	1.0327	0.9789	0.7056	0.7517	0.7609	0.8192	0.7754	0.736	0.7548	1.0736	0.933	0.6413	0.8124		113	0.4721	0.5407	0.5933	0.563	0.5978	0.6274	0.6091	0.5899	0.54	0.5529	0.5892	0.7291	0.7161	0.4636	0.6295
0.855121	0.12845	0.5825	0.0804099		114	0.8293	1.1499	0.9329	0.7504	0.8176	0.7455	0.8165	0.8502	0.6956	0.8597	0.9603	1.0391	0.7016	0.8231		114	0.4731	0.5306	0.5433	0.5614	0.5447	0.6483	0.6087	0.5944	0.5101	0.5743	0.6015	0.7392	0.7259	0.4602	0.6218
0.875136	0.140682	0.581	0.0837118		115	0.8392	1.2118	0.9494	0.7064	0.7939	0.7445	0.8757	0.8787	0.7331	0.8857	1.0334	1.0271	0.7659	0.8071		115	0.4722	0.5266	0.5614	0.5687	0.5435	0.6426	0.6248	0.5554	0.4803	0.5617	0.6062	0.7238	0.7625	0.4811	0.6042
0.883721	0.142716	0.58518	0.0895851		116	0.8244	1.2008	0.9937	0.6857	0.7846	0.7259	0.8748	0.8976	0.753	0.8822	1.0761	0.983	0.784	0.9063		116	0.4745	0.5248	0.5941	0.5559	0.5514	0.6259	0.6367	0.5425	0.4868	0.5541	0.629	0.7197	0.783	0.4604	0.6389
0.889421	0.127086	0.582213	0.0819824		117	0.8628	1.1629	1.0185	0.7269	0.8192	0.7869	0.8531	0.9094	0.7763	0.8598	1.0511	0.9304	0.7265	0.9681		117	0.4841	0.5037	0.5649	0.546	0.5456	0.6266	0.635	0.5503	0.519	0.5504	0.649	0.7182	0.7458	0.4685	0.6261
0.886864	0.134619	0.58712	0.079192		118	0.8926	1.1688	0.993	0.7355	0.8255	0.8281	0.8469	0.8798	0.7756	0.7949	1.0968	0.971	0.6871	0.9205		118	0.4855	0.4896	0.5414	0.5549	0.5798	0.6224	0.6339	0.5584	0.5816	0.5416	0.6542	0.726	0.7527	0.5023	0.5825
0.880579	0.13445	0.5987	0.0791833		119	0.9405	1.1942	0.9395	0.7429	0.8104	0.8039	0.8452	0.8541	0.7742	0.8235	1.0585	0.9919	0.683	0.8663		119	0.4963	0.5069	0.5584	0.5753	0.6148	0.6328	0.6523	0.5619	0.6144	0.5468	0.6281	0.7451	0.7613	0.5032	0.5829
0.866186	0.128786	0.5973	0.0879548		120	0.9601	1.207	0.9235	0.7542	0.8205	0.762	0.8681	0.8188	0.8027	0.781	0.9669	0.9481	0.6953	0.8184		120	0.4905	0.5102	0.5514	0.5702	0.5987	0.6431	0.64	0.5427	0.5624	0.5525	0.644	0.7765	0.7757	0.4965	0.6051
0.879771	0.131297	0.59554	0.0917934		121	0.9667	1.2316	0.9517	0.7448	0.8529	0.804	0.8951	0.8028	0.8329	0.774	0.9945	0.915	0.7155	0.8353		121	0.4876	0.524	0.5111	0.601	0.5868	0.6468	0.6122	0.5303	0.5322	0.5502	0.6657	0.7768	0.7732	0.4975	0.6377
0.879129	0.118725	0.595927	0.0888787		122	0.9095	1.2058	0.9407	0.7256	0.8325	0.828	0.898	0.8416	0.828	0.8163	0.9896	0.9124	0.7356	0.8442		122	0.5002	0.5477	0.5078	0.581	0.59	0.6555	0.6274	0.5424	0.512	0.5375	0.6762	0.7608	0.7624	0.4968	0.6412
0.881743	0.110601	0.605993	0.0822802		123	0.8818	1.1789	0.9346	0.78	0.8402	0.8276	0.8578	0.8678	0.8083	0.8283	1.0319	0.9288	0.7575	0.8209		123	0.5095	0.5663	0.5364	0.5908	0.6129	0.6622	0.6285	0.5573	0.5047	0.5518	0.6949	0.7212	0.7797	0.5258	0.6479
0.893157	0.121075	0.604847	0.0868967		124	0.923	1.175	0.9465	0.7788	0.8962	0.7774	0.834	0.8819	0.8313	0.7876	1.0837	0.9566	0.745	0.8872		124	0.499	0.5309	0.5597	0.5673	0.6042	0.6376	0.62	0.5525	0.5321	0.5511	0.7093	0.6988	0.8123	0.5264	0.6715
0.897057	0.121847	0.619133	0.0879291		125	0.9858	1.1349	0.9763	0.7627	0.8679	0.7811	0.8445	0.9037	0.8281	0.8016	1.0122	0.961	0.6892	1.0098		125	0.4911	0.5469	0.5539	0.5687	0.6214	0.6431	0.6232	0.5593	0.5678	0.5621	0.6892	0.7368	0.8161	0.5836	0.7238
0.88995	0.109861	0.628193	0.0960485		126	0.9194	1.0742	1.0235	0.7346	0.8638	0.809	0.8853	0.8928	0.7953	0.8432	1.0103	0.974	0.6955	0.9384		126	0.4978	0.575	0.535	0.5816	0.6274	0.6588	0.6255	0.5641	0.5645	0.5647	0.6617	0.7694	0.8432	0.5957	0.7585
0.898757	0.131394	0.632267	0.0990108		127	0.8687	1.2023	1.0409	0.7494	0.8676	0.858	0.877	0.8464	0.7612	0.8533	1.0521	0.9945	0.7281	0.8831		127	0.5133	0.5826	0.5442	0.5942	0.6214	0.6647	0.6378	0.5727	0.5861	0.5501	0.6235	0.7583	0.8992	0.6046	0.7313
0.906007	0.127157	0.639047	0.100468		128	0.9041	1.2036	0.9956	0.795	0.8413	0.8865	0.8474	0.8228	0.8213	0.86	1.1162	0.9562	0.7318	0.9023		128	0.5208	0.586	0.5536	0.5837	0.6322	0.6858	0.6359	0.5755	0.5828	0.5463	0.6532	0.779	0.8918	0.6119	0.7472
0.908593	0.118942	0.646227	0.0957324		129	0.9004	1.17	0.9993	0.7727	0.8284	0.8953	0.8641	0.8556	0.8453	0.8549	1.0952	0.9643	0.7314	0.9434		129	0.5335	0.5583	0.5564	0.6034	0.6381	0.7081	0.6219	0.5791	0.5776	0.5653	0.705	0.7806	0.8376	0.6424	0.7861
0.909057	0.111328	0.65098	0.0996821		130	0.8926	1.144	1.0446	0.7547	0.8843	0.9168	0.9091	0.8612	0.8323	0.9055	1.049	0.9214	0.7236	0.8877		130	0.5713	0.5259	0.5682	0.6184	0.6563	0.7078	0.6122	0.5737	0.5789	0.5517	0.6719	0.7669	0.8587	0.6956	0.8072
0.918579	0.115676	0.660093	0.102815		131	0.9662	1.1071	1.0423	0.7981	0.8683	0.8581	0.9369	0.8777	0.8401	0.8584	1.1426	0.9546	0.7307	0.879		131	0.5729	0.5252	0.6108	0.6213	0.6905	0.7403	0.6021	0.543	0.603	0.548	0.7184	0.7846	0.8446	0.6795	0.8172
0.900064	0.128007	0.668993	0.100482		132	0.9381	1.0731	1.0133	0.8154	0.8197	0.7918	0.9202	0.8619	0.8447	0.8088	1.1894	0.9489	0.6906	0.885		132	0.5606	0.5348	0.5949	0.621	0.7449	0.7368	0.6106	0.5636	0.6126	0.5845	0.7264	0.7635	0.8597	0.7201	0.8009
0.891079	0.131239	0.6899	0.112706		133	0.897	1.1719	1.015	0.8093	0.8395	0.794	0.8974	0.8802	0.7829	0.8428	1.0981	0.8632	0.6627	0.9211		133	0.5918	0.5545	0.6033	0.6408	0.779	0.7223	0.616	0.559	0.608	0.6088	0.718	0.7886	0.9096	0.8166	0.8322
0.901757	0.123873	0.709007	0.124648		134	0.9035	1.1926	1.0092	0.8784	0.8445	0.8224	0.8703	0.8817	0.7374	0.8939	1.0552	0.8991	0.7015	0.9349		134	0.6048	0.5542	0.6216	0.6783	0.7625	0.7199	0.6254	0.5501	0.6258	0.6365	0.7526	0.8217	0.9183	0.8159	0.9475
0.91	0.110526	0.70614	0.111093		135	0.8763	1.1259	1.0052	0.8989	0.8629	0.8161	0.8948	0.8962	0.7717	0.8584	1.108	0.9893	0.7622	0.8741		135	0.5918	0.5558	0.6546	0.6827	0.743	0.7353	0.6261	0.57	0.6471	0.6552	0.7772	0.7826	0.9112	0.7371	0.9224
0.930021	0.119325	0.71292	0.114497		136	0.9014	1.1956	1.0096	0.876	0.9017	0.7851	0.9381	0.881	0.8378	0.8154	1.1164	1.0455	0.8475	0.8692		136	0.5979	0.5543	0.6518	0.6861	0.7255	0.7683	0.6145	0.6013	0.6292	0.6813	0.756	0.7874	0.9454	0.7778	0.917
0.910729	0.111027	0.735513	0.124472		137	0.8994	1.2034	0.996	0.8294	0.9307	0.7765	0.8967	0.8557	0.8375	0.8219	0.985	1.0056	0.8051	0.9073		137	0.6233	0.5653	0.6618	0.7115	0.7138	0.7868	0.6382	0.6291	0.6653	0.6771	0.7774	0.8067	1.0183	0.8116	0.9465
0.890264	0.107706	0.752253	0.122881		138	0.8732	1.1381	0.9833	0.8318	0.9465	0.7951	0.8003	0.813	0.8415	0.8416	0.9514	1.0274	0.7373	0.8832		138	0.6244	0.5827	0.6889	0.7471	0.7344	0.7753	0.6659	0.6452	0.7204	0.6722	0.8196	0.7807	1.0172	0.8245	0.9853
0.891621	0.119941	0.765047	0.122231		139	0.8568	1.1768	0.9613	0.8325	0.9744	0.7819	0.7804	0.8129	0.8677	0.8098	0.9625	1.037	0.7328	0.8959		139	0.6407	0.6078	0.7625	0.7345	0.782	0.7541	0.6928	0.638	0.6887	0.6725	0.833	0.7917	0.9855	0.8669	1.025
0.887336	0.112553	0.76758	0.13263		140	0.9074	1.1252	0.9636	0.8124	0.9497	0.7609	0.8281	0.8011	0.8501	0.8147	1.0186	0.9588	0.7014	0.9307		140	0.6551	0.615	0.793	0.7027	0.8339	0.7714	0.6587	0.6176	0.6904	0.6634	0.8029	0.7655	0.9926	0.9004	1.0511
0.8899	0.100774	0.787453	0.156789		141	0.9366	1.089	0.9456	0.855	0.9054	0.8082	0.8589	0.8275	0.7953	0.8492	1.0439	0.9361	0.697	0.9109		141	0.7044	0.6448	0.8293	0.6808	0.8335	0.8393	0.6583	0.6121	0.7176	0.6383	0.7825	0.7511	1.0833	0.8978	1.1387
0.902364	0.111666	0.807213	0.168027		142	0.9121	1.1549	0.921	0.8589	0.914	0.8218	0.8927	0.814	0.8339	0.8088	1.0938	0.9213	0.7335	0.9524		142	0.736	0.6627	0.8908	0.7139	0.7876	0.8184	0.6618	0.6213	0.6972	0.6715	0.8178	0.7925	1.1517	0.9062	1.1788
0.909007	0.116165	0.825973	0.171948		143	0.9047	1.1394	0.9217	0.8283	0.9452	0.814	0.9502	0.831	0.8781	0.7739	1.0963	0.9604	0.716	0.9669		143	0.7209	0.6564	0.9135	0.7306	0.7478	0.7919	0.6832	0.6516	0.717	0.7239	0.8983	0.8634	1.2105	0.9165	1.1641
0.887014	0.119097	0.82566	0.160157		144	0.887	1.1577	0.8831	0.8027	0.9115	0.8126	0.886	0.8158	0.8552	0.8107	1.0055	1.0224	0.6568	0.9112		144	0.7267	0.659	0.8989	0.7509	0.7931	0.8135	0.6625	0.6442	0.7454	0.7475	0.8333	0.8725	1.1535	0.9116	1.1723
0.878929	0.0976097	0.835133	0.150538		145	0.941	1.0501	0.8913	0.7645	0.8537	0.8255	0.8744	0.8368	0.8335	0.8324	1.0256	0.9811	0.6909	0.9042		145	0.7783	0.6809	0.9358	0.7904	0.8707	0.8478	0.6805	0.6409	0.7273	0.748	0.802	0.7995	1.1106	0.9597	1.1546
0.885929	0.0945979	0.837447	0.144347		146	0.946	1.0162	0.931	0.8136	0.8851	0.8373	0.8332	0.8411	0.8613	0.7477	1.0698	0.9698	0.7434	0.9075		146	0.7603	0.6809	0.9363	0.7987	0.8918	0.8121	0.7075	0.6687	0.7599	0.7409	0.8144	0.803	1.1174	0.9174	1.1524
0.899986	0.130738	0.870527	0.168109		147	0.9839	1.0491	0.9649	0.8859	0.9132	0.8261	0.8067	0.7832	0.8348	0.7067	1.1416	1.0617	0.7163	0.9257		147	0.7597	0.7024	0.9872	0.8006	0.8926	0.7963	0.7408	0.7074	0.7986	0.777	0.8116	0.8296	1.2318	1.0068	1.2155
0.892664	0.128707	0.894093	0.165955		148	1.006	0.9688	0.9431	0.9003	0.8777	0.7767	0.8718	0.7308	0.8268	0.7713	1.1444	1.0545	0.6854	0.9397		148	0.8048	0.7064	1.0317	0.8285	0.9104	0.8142	0.7418	0.729	0.7736	0.82	0.9083	0.84	1.1713	1.0805	1.2509
0.884793	0.106672	0.89342	0.179701		149	0.9412	0.9479	0.916	0.8915	0.8793	0.7905	0.9206	0.7553	0.7903	0.7928	1.0365	1.1045	0.7297	0.891		149	0.7526	0.7115	1.0714	0.8254	0.8948	0.825	0.7323	0.7252	0.7302	0.8247	0.9502	0.8082	1.1847	1.1117	1.2534
0.886514	0.0993365	0.89466	0.207413		150	0.9638	0.989	0.877	0.9124	0.9169	0.7735	0.9357	0.7783	0.8187	0.7624	1.0161	1.0649	0.7957	0.8068		150	0.753	0.7457	1.0906	0.8047	0.8083	0.8229	0.7264	0.687	0.6999	0.8097	0.9108	0.8295	1.2332	1.1655	1.3327
0.888836	0.107714	0.87658	0.173452		151	0.9677	0.9867	0.9009	0.8757	0.9091	0.7511	0.9316	0.7829	0.8862	0.7398	1.0729	1.0504	0.761	0.8277		151	0.7564	0.7661	1.0587	0.7646	0.8278	0.8199	0.7153	0.7126	0.726	0.8029	0.8801	0.8269	1.2232	1.075	1.1932
0.901886	0.117678	0.8996	0.173672		152	0.9135	0.9982	0.927	0.89	0.9163	0.8137	0.9364	0.8049	0.8865	0.7557	1.1244	1.0894	0.691	0.8794		152	0.7464	0.7755	1.0495	0.8016	0.8787	0.8057	0.7005	0.799	0.7392	0.9174	0.9667	0.7939	1.2567	1.0438	1.2194
0.917307	0.109699	0.897853	0.166355		153	0.9174	1.0268	0.9376	0.8935	0.8811	0.8909	0.928	0.8145	0.8548	0.8303	1.0787	1.1268	0.6997	0.9622		153	0.7519	0.7617	1.0601	0.8503	0.8697	0.8233	0.6997	0.8089	0.7628	0.8502	0.9217	0.8102	1.2373	1.0472	1.2128
0.912971	0.114095	0.890213	0.157541		154	0.9544	1.0228	0.9496	0.8569	0.8207	0.8605	0.892	0.7897	0.9147	0.8802	1.0065	1.1232	0.6772	1.0332		154	0.7961	0.7454	1.0291	0.8699	0.8587	0.8567	0.6983	0.7702	0.7857	0.7771	0.8824	0.8226	1.2245	1.1026	1.1339
0.916107	0.107835	0.9219	0.178974		155	0.9982	1.0753	0.9704	0.8555	0.8556	0.8317	0.9015	0.825	0.8724	0.8617	0.9912	1.0927	0.7023	0.992		155	0.8479	0.7744	1.0844	0.8778	0.902	0.8508	0.7064	0.7728	0.8318	0.8205	0.876	0.8061	1.2843	1.1612	1.2321
0.930864	0.102985	0.94494	0.201244		156	1.0169	1.0919	1.0156	0.8699	0.9351	0.8354	0.8918	0.8544	0.8143	0.801	1.0601	1.0454	0.8136	0.9867		156	0.8595	0.8138	1.1797	0.9513	0.9204	0.8463	0.705	0.7643	0.8076	0.8812	0.8901	0.8064	1.3992	1.0526	1.2967
0.926371	0.10708	0.936753	0.187192		157	1.0372	1.0589	0.9763	0.9397	0.8923	0.8174	0.8146	0.8418	0.8359	0.8057	1.1351	1.0108	0.8339	0.9696		157	0.8492	0.8375	1.1708	1.0092	0.906	0.845	0.723	0.7474	0.7655	0.9014	0.9079	0.848	1.339	0.9173	1.2841
0.902071	0.11516	0.935533	0.159872		158	0.9572	1.0725	0.965	0.9222	0.8704	0.7803	0.8305	0.8339	0.8296	0.8175	1.1496	0.9757	0.7253	0.8993		158	0.8592	0.8012	1.1256	1.0131	0.9716	0.8308	0.7412	0.8054	0.771	0.9133	0.8558	0.9136	1.226	0.9441	1.2611
0.8889	0.0957922	0.936187	0.147534		159	0.9037	1.0383	0.9631	0.9275	0.9179	0.754	0.8802	0.8193	0.8364	0.8189	0.9825	1.0049	0.6996	0.8983		159	0.8159	0.7992	1.0615	1.0689	0.9962	0.811	0.7447	0.8276	0.8277	0.9271	0.9094	0.9161	1.1475	0.9184	1.2716
0.924964	0.0960042	0.92432	0.155417		160	0.9402	1.072	0.9985	0.9576	0.927	0.7578	0.9046	0.8541	0.9179	0.7975	0.9911	1.0574	0.7947	0.9791		160	0.8397	0.8073	1.0563	1.0326	0.9477	0.8483	0.7312	0.7855	0.8237	0.9079	0.9319	0.828	1.139	0.8663	1.3194
0.910486	0.11379	0.935773	0.15539		161	0.938	1.1778	0.9124	0.962	0.872	0.7513	0.8624	0.87	0.8665	0.7936	1.0206	0.9972	0.7551	0.9679		161	0.9161	0.8083	1.1154	1.0239	0.9055	0.8766	0.7497	0.7919	0.7958	0.9335	0.902	0.8601	1.1906	0.8756	1.2916
0.890907	0.10003	0.93338	0.156865		162	0.894	1.0993	0.9174	0.8836	0.8265	0.7813	0.8392	0.8789	0.8155	0.8087	0.9872	1.0439	0.7532	0.944		162	0.8674	0.7976	1.1642	1.0039	0.9644	0.8834	0.79	0.8291	0.7554	0.9988	0.8737	0.8177	1.1722	0.8232	1.2597
0.901307	0.0806757	0.94396	0.159967		163	0.8917	1.0583	0.9761	0.8822	0.7911	0.7935	0.8957	0.9095	0.8241	0.8458	0.9595	1.0213	0.8482	0.9213		163	0.8449	0.8171	1.1707	0.9872	1.0647	0.8787	0.7766	0.9172	0.8019	0.9965	0.9059	0.8008	1.2383	0.7587	1.2002
0.891457	0.101983	0.951447	0.177984		164	0.9904	1.1517	0.9386	0.8172	0.7589	0.8018	0.8995	0.8611	0.8193	0.805	0.9204	0.9749	0.839	0.9026		164	0.8719	0.8517	1.2054	1.0293	1.0871	0.8034	0.794	0.8385	0.8667	0.9894	0.9558	0.7924	1.3271	0.7028	1.1562
0.907014	0.120512	0.951807	0.20542		165	1.0093	1.1478	0.8986	0.8778	0.8268	0.8236	0.9517	0.8298	0.773	0.7998	1.0184	1.0442	0.725	0.9724		165	0.878	0.8614	1.3321	0.9491	1	0.7824	0.7604	0.7779	0.8441	1.0012	0.9859	0.807	1.3917	0.7239	1.182
0.922679	0.122366	0.94924	0.18824		166	0.968	1.0845	0.9743	0.9542	0.8526	0.8056	0.9204	0.8518	0.7932	0.8086	1.1007	1.1041	0.7192	0.9803		166	0.8345	0.8781	1.3543	0.8749	0.9886	0.8169	0.765	0.8161	0.8894	0.9842	0.9677	0.8633	1.274	0.7219	1.2097
0.930814	0.102988	0.949367	0.173018		167	0.9609	1.0336	1.0179	0.9785	0.8505	0.8018	0.9088	0.8992	0.8407	0.7634	1.0944	1.0597	0.8346	0.9874		167	0.8728	0.9288	1.2281	0.8834	1.0161	0.8147	0.7891	0.8276	0.9011	1.004	0.9304	0.9177	1.1878	0.6506	1.2883
0.926157	0.0981082	0.939173	0.146158		168	0.9718	1.0457	1.0104	0.9717	0.8535	0.7421	0.9027	0.9266	0.8179	0.802	1.0365	0.9886	0.8598	1.0369		168	0.8822	0.8788	1.1405	0.9549	1.0367	0.84	0.7973	0.8797	0.8645	0.9647	0.9185	0.8846	1.2097	0.6681	1.1674
0.904236	0.110728	0.961593	0.164063		169	0.9961	1.0581	0.9849	1.0068	0.8409	0.7055	0.8542	0.9061	0.7779	0.7993	1.0303	0.956	0.7806	0.9626		169	0.8973	0.8257	1.1872	1.0227	1.1535	0.8265	0.7885	0.8785	0.8343	1.0028	1.0337	0.8757	1.2792	0.721	1.0973
0.899071	0.120353	0.954253	0.162594		170	0.9914	1.0517	0.9494	0.8613	0.8123	0.7261	0.8649	0.8949	0.7661	0.8071	1.1233	0.9934	0.756	0.9891		170	0.8728	0.8056	1.1385	1.0617	1.2496	0.8022	0.8184	0.8245	0.8434	0.9987	1.0324	0.8925	1.2307	0.7374	1.0054
0.9091	0.106349	0.93058	0.13731		171	1.0113	1.0435	0.9342	0.8496	0.8731	0.7869	0.903	0.8714	0.7981	0.8451	1.0759	1.0218	0.7259	0.9876		171	0.8787	0.81	1.0913	1.1064	1.099	0.7679	0.8378	0.825	0.9105	0.9608	0.9105	0.8681	1.1673	0.7135	1.0119
0.906179	0.080857	0.936047	0.163303		172	0.96	1.0002	0.9663	0.8576	0.889	0.8785	0.9125	0.8608	0.8131	0.7786	1.007	1.0077	0.7852	0.97		172	0.9387	0.8412	1.1035	1.0727	1.0524	0.7438	0.8117	0.8627	0.8535	0.9923	0.8611	0.8361	1.2947	0.679	1.0973
0.907607	0.0893869	0.95052	0.18857		173	0.9095	1.0409	0.9861	0.8293	0.8731	0.8656	0.9185	0.8489	0.7828	0.7962	1.0846	0.9577	0.8544	0.9589		173	0.9703	0.8681	1.0693	0.9811	1.0964	0.7831	0.7723	0.8622	0.8265	1.0306	0.9261	0.8356	1.4	0.647	1.1892
0.899257	0.103264	0.9473	0.183495		174	0.9817	1.0548	0.9913	0.7756	0.8331	0.7866	0.891	0.8472	0.7919	0.8793	1.0744	0.9445	0.7754	0.9628		174	0.9492	0.8853	1.1251	0.9311	1.1952	0.8673	0.7457	0.8887	0.8748	1.017	0.9042	0.8422	1.3517	0.5894	1.0426
0.899721	0.101841	0.960853	0.18739		175	1.0097	1.0448	1.0055	0.7889	0.8825	0.7661	0.8883	0.8594	0.8137	0.8392	1.0417	0.9656	0.7536	0.9371		175	0.9184	0.8781	1.1766	1.0034	1.0725	0.8869	0.7945	0.9532	0.9659	1.0608	0.8717	0.8534	1.4504	0.6188	0.9082
0.916557	0.100825	0.961747	0.194611		176	1.0465	1.0303	0.9765	0.8682	0.9412	0.781	0.899	0.8782	0.8265	0.7683	1.0726	1.0237	0.8193	0.9005		176	0.9363	0.8666	1.1305	1.0309	1.0196	0.8388	0.827	0.9808	0.9809	1.1081	0.8706	0.8907	1.4951	0.6284	0.8219
0.9389	0.124953	0.958187	0.160628		177	1.0569	1.0096	1.02	0.922	0.9144	0.7711	0.9044	0.9042	0.7955	0.7824	1.1377	1.138	0.7998	0.9886		177	0.9188	0.8807	1.0099	1.0538	1.1183	0.7911	0.8011	1.0088	0.9882	1.1123	0.9122	0.9045	1.3371	0.68	0.856
0.923371	0.12484	0.97396	0.148297		178	0.9518	0.9849	1.0263	0.9294	0.9	0.7697	0.9257	0.8778	0.7671	0.7785	1.0776	1.1441	0.7525	1.0418		178	0.9262	0.8963	1.0109	1.0735	1.1193	0.8278	0.7961	1.0137	0.971	1.1059	0.9465	0.9163	1.3303	0.7215	0.9541
0.914179	0.113508	0.968947	0.163418		179	0.9969	1.0624	0.9858	0.8427	0.8929	0.806	0.9224	0.8413	0.7937	0.7709	0.9887	1.1384	0.7848	0.9716		179	0.8997	0.8835	1.0751	1.0072	1.0858	0.884	0.7741	0.9898	0.9225	1.0649	0.9584	0.9054	1.4414	0.7604	0.882
0.906579	0.112775	0.960293	0.161293		180	0.9993	1.0714	0.9668	0.8118	0.8877	0.8255	0.9363	0.8188	0.8262	0.7538	0.9493	1.1424	0.7877	0.9151		180	0.8989	0.8681	1.1504	0.943	1.139	0.868	0.7858	0.954	0.9284	1.0349	1.0005	0.9127	1.367	0.7505	0.8032
0.90885	0.099572	0.949413	0.173032		181	0.973	0.9707	0.9629	0.8398	0.869	0.8408	0.9327	0.8253	0.8843	0.7509	1.0084	1.1263	0.7871	0.9527		181	0.9519	0.8468	1.1978	0.9107	1.0976	0.7952	0.8027	0.9371	0.8531	1.0441	1.0343	0.9053	1.3577	0.6938	0.8131
0.920793	0.110618	0.970853	0.18445		182	1.0268	0.9703	0.9771	0.8907	0.8754	0.8389	0.8891	0.8354	0.8569	0.7498	1.13	1.1004	0.8019	0.9484		182	0.9782	0.8709	1.1888	0.9841	1.1074	0.7933	0.8128	0.8904	0.8475	1.0548	1.098	0.9547	1.4367	0.7362	0.809
0.927607	0.130715	0.97798	0.185642		183	1.0373	1.072	0.9214	0.8674	0.9321	0.8372	0.8529	0.8377	0.8705	0.736	1.1886	1.1131	0.7823	0.938		183	0.9553	0.8522	1.0447	1.0398	1.1101	0.8366	0.7956	0.8705	0.9072	1.1188	1.1315	1.0132	1.4626	0.7427	0.7889
0.94605	0.134555	0.995873	0.229625		184	1.033	1.1572	0.9346	0.8728	0.9158	0.8828	0.933	0.8559	0.8992	0.7469	1.1494	1.1419	0.7417	0.9805		184	1.0044	0.8176	0.9832	1.0103	1.1574	0.8131	0.7824	0.9454	0.9705	1.1871	1.1185	0.9792	1.6515	0.7168	0.8007
0.939807	0.105343	0.998373	0.236194		185	1.0115	1.0766	1.0347	0.9015	0.858	0.9105	0.9642	0.8415	0.8722	0.8067	1.1004	1.0699	0.7752	0.9344		185	1.0074	0.8207	1.0609	0.9981	1.2035	0.798	0.8253	1.0113	0.9793	1.0992	1.035	0.888	1.7062	0.7215	0.8212
0.9194	0.0950956	0.998873	0.23775		186	0.9271	1.0711	0.9705	0.9266	0.8403	0.8606	0.9365	0.8545	0.7994	0.8298	1.0929	1.0337	0.8098	0.9188		186	0.9836	0.8302	1.0761	1.0023	1.1885	0.7833	0.8469	0.9693	1.0085	1.0437	1.0401	0.8546	1.7367	0.7401	0.8792
0.92785	0.110104	1.00349	0.239258		187	0.9472	1.1271	0.9311	0.925	0.8874	0.8024	0.9605	0.853	0.7975	0.8153	1.1138	1.0719	0.836	0.9217		187	0.9608	0.8641	1.0872	1.0277	1.1848	0.7775	0.8101	0.9328	1.0196	1.1628	1.0295	0.8879	1.7211	0.7535	0.8329
0.940529	0.136078	0.980107	0.210687		188	0.9874	1.1679	0.9484	0.8955	0.9239	0.7812	0.998	0.8267	0.8202	0.7577	1.2015	1.081	0.8593	0.9187		188	0.9504	0.8936	1.0676	1.008	1.1508	0.7745	0.7863	0.9279	0.969	1.2014	1.0095	0.9089	1.5554	0.7374	0.7609
0.951786	0.146074	0.965033	0.192482		189	0.9864	1.1597	0.9704	0.9209	0.9483	0.7966	1.0033	0.8381	0.8323	0.6887	1.2153	1.1294	0.8668	0.9688		189	0.9357	0.9461	1.0381	0.9913	1.0815	0.7908	0.8308	0.9691	0.8822	1.1646	0.9327	0.8421	1.5244	0.777	0.7691
0.921436	0.129037	0.987753	0.195433		190	0.9608	1.0765	0.9612	0.8917	0.8491	0.8373	1.03	0.8791	0.7904	0.6579	1.0905	1.1247	0.8458	0.9051		190	0.992	0.9431	1.1349	1.0363	1.0527	0.8181	0.8579	0.9686	0.8141	1.1927	0.9717	0.8204	1.5453	0.8396	0.8289
0.897386	0.120952	1.01574	0.208813		191	0.9515	1.0676	0.9678	0.8332	0.8156	0.7851	0.9607	0.8458	0.8322	0.6742	1.0856	1.0626	0.8451	0.8364		191	0.9643	0.9532	1.1813	0.9975	1.0913	0.809	0.8984	0.9909	0.8338	1.2568	1.0003	0.831	1.6154	0.8604	0.9525
0.923336	0.121502	1.00225	0.184467		192	0.9918	1.1113	0.9887	0.8243	0.9046	0.797	0.941	0.8008	0.882	0.7152	1.0535	1.1291	0.8863	0.9011		192	0.926	1.0059	1.1344	0.98	1.155	0.8019	0.9171	0.9202	0.8502	1.245	0.9413	0.8557	1.4987	0.8785	0.9239
0.936671	0.142458	0.992793	0.152538		193	1.038	1.2255	1.031	0.8512	0.9259	0.8045	0.9566	0.7822	0.8256	0.7257	1.0316	1.1235	0.8327	0.9594		193	0.9675	1.0372	1.1126	0.9719	1.1292	0.8404	0.8906	0.9191	0.8306	1.1988	0.9539	0.9015	1.3759	0.8665	0.8962
0.925514	0.1552	0.985547	0.15242		194	1.0579	1.1945	0.9965	0.8404	0.8658	0.8267	0.9555	0.7754	0.8022	0.7201	1.1093	1.1237	0.7208	0.9684		194	0.9371	0.9844	1.0743	0.9781	1.0496	0.8396	0.8363	1.002	0.7849	1.2355	0.9399	0.9231	1.3696	0.9328	0.896
0.933771	0.148025	0.98982	0.207701		195	1.009	1.1857	0.9797	0.9302	0.8575	0.8753	0.931	0.832	0.8749	0.729	1.0926	1.1868	0.6931	0.896		195	0.8768	0.9061	1.0879	1.0023	1.058	0.867	0.7958	1.0185	0.8015	1.2288	0.9072	0.9296	1.6126	0.8696	0.8856
0.9398	0.140945	1.00018	0.255112		196	1.0384	1.1733	0.9982	0.8933	0.8806	0.8853	0.9329	0.8571	0.8564	0.7247	1.0808	1.1989	0.7663	0.871		196	0.8798	0.8565	1.094	1.0438	1.0824	0.8552	0.8034	0.995	0.8574	1.1543	0.8926	0.9791	1.8308	0.8184	0.86
0.91625	0.13102	0.998007	0.256051		197	1.0105	1.1039	0.992	0.7904	0.9282	0.8374	0.911	0.8298	0.7633	0.7705	1.1005	1.1266	0.7747	0.8887		197	0.8331	0.8244	1.0123	1.1645	1.0099	0.8485	0.8405	0.9627	0.8641	1.0954	0.8901	1.0582	1.835	0.9196	0.8118
