# Supplementary material for: Hypoxia controls plasma membrane targeting of polarity proteins by dynamic turnover of PI4P and PI(4,5)P2
Source: eLife. 2022 Jun 9;11:e79582. doi: 10.7554/eLife.79582 (PMC9242647; doi:10.7554/eLife.79582)
Supplement: Figure 3—source data 3. [file elife-79582-fig3-data3.xlsx]

## Sheet: Figure 3B-P4M
Figure 3 Souce Data 3
	PM: P4MX2	PM: PI4K-3KD
1	133.76	111.71
2	151.73	110.78
3	128.22	88.43
4	138.61	103.87
5	138.61	106.92
6	137.48	85.81
7	127.38	97.72
8	142.05	127.16
9	131.06	99.21
10	139.37	101.9
11	127.02	91.17
12	144.67	109.15
13	144.21	118.19
14	139.64	106.98
15	169.66	127.16
16	158.05	96.05
17	149.38	131.96
18	149.94	106.716
19	127.83
20	158.23
	bck value=	84.2617
