# Supplementary material for: Hypoxia controls plasma membrane targeting of polarity proteins by dynamic turnover of PI4P and PI(4,5)P2
Source: eLife. 2022 Jun 9;11:e79582. doi: 10.7554/eLife.79582 (PMC9242647; doi:10.7554/eLife.79582)
Supplement: Figure 3—source data 4. [file elife-79582-fig3-data4.xlsx]

## Sheet: Figure 3B-PLC-PH
Figure 3 Souce Data 4
	PM: PLC-PH::GFP	PM: PI4K-3KD
1	13743.3	16455.6
2	16757.2	15832.3
3	18402.2	19032.2
4	16939.9	18364.3
5	15898.7	17634.7
6	15501.6	17068.1
7	15826.3	16392.7
8	16147.3	18530.9
9	14351.6	18105
10	19011.6	19248
11	14980	15832.9
12	16412.9	17980
13	17554.5	16854.4
14	16790.7	17030
15	17890.4	19030.1
16	15294.9	19598.5
17	15777.1	16877.7
18	16703.9	19171.4
19	18614.9	16044.2
20	15066.2	17989.2
