# Supplementary material for: Hypoxia controls plasma membrane targeting of polarity proteins by dynamic turnover of PI4P and PI(4,5)P2
Source: eLife. 2022 Jun 9;11:e79582. doi: 10.7554/eLife.79582 (PMC9242647; doi:10.7554/eLife.79582)
Supplement: Figure 3—source data 5. [file elife-79582-fig3-data5.xlsx]

## Sheet: Figure 3-fig sup 1 P4M
Figure 3 Souce Data 5
						1	2	3	4	5	6	7	8	9	10			1	2	3	4	5	6	7	8	9	10
WT		RNAi			WT												RNAi
AVG	STDEV	AVG	STDEV
C2_PM/Cy	C2_PM/Cy	C2_PM/Cy	C2_PM/Cy		min	C2_PM/Cy	C2_PM/Cy	C2_PM/Cy	C2_PM/Cy	C2_PM/Cy	C2_PM/Cy	C2_PM/Cy	C2_PM/Cy	C2_PM/Cy	C2_PM/Cy		min	C2_PM/Cy	C2_PM/Cy	C2_PM/Cy	C2_PM/Cy	C2_PM/Cy	C2_PM/Cy	C2_PM/Cy	C2_PM/Cy	C2_PM/Cy	C2_PM/Cy
2.40949	0.121568	2.3099	0.149773		1	2.506	2.3456	2.5854	2.4267	2.4581	2.1419	2.3196	2.4436	2.3895	2.4785		1	2.4394	2.1762	2.2004	2.0186	2.287	2.2366	2.4039	2.4618	2.4376	2.4375
2.37153	0.199561	2.31081	0.096199		2	2.479	2.3382	2.7263	2.1299	2.4029	2.4878	2.0997	2.3164	2.1804	2.5547		2	2.486	2.3347	2.257	2.1756	2.2055	2.266	2.2938	2.3349	2.3139	2.4407
2.39819	0.14414	2.31302	0.154153		3	2.4604	2.3038	2.5975	2.1996	2.5307	2.4258	2.3434	2.5691	2.1905	2.3611		3	2.3972	2.1431	2.3396	2.1439	2.384	2.1942	2.1212	2.3568	2.5054	2.5448
2.34399	0.199818	2.36016	0.166962		4	2.3812	2.0538	2.6369	2.165	2.5287	2.3304	2.214	2.631	2.2967	2.2022		4	2.2835	2.4223	2.4595	2.2984	2.2358	2.532	2.2196	2.1719	2.706	2.2726
2.28736	0.177748	2.36905	0.149989		5	2.5041	2.1042	2.5573	2.0293	2.3801	2.2819	2.0606	2.3484	2.3085	2.2992		5	2.4926	2.4951	2.4194	2.1636	2.4042	2.4821	2.3773	2.0504	2.4687	2.3371
2.35803	0.128917	2.26383	0.090321		6	2.3682	2.2529	2.5445	2.3437	2.459	2.233	2.3952	2.5262	2.1435	2.3141		6	2.2833	2.3403	2.453	2.1431	2.2457	2.2536	2.2385	2.1721	2.3142	2.1945
2.34789	0.160616	2.29549	0.12019		7	2.4364	2.2283	2.6278	2.4187	2.3787	2.1466	2.3254	2.3234	2.0982	2.4954		7	2.279	2.2768	2.413	2.2663	2.1789	2.3025	2.3769	2.0365	2.4126	2.4124
2.29623	0.142229	2.18057	0.0793827		8	2.2497	2.1553	2.5655	2.2639	2.4522	2.2472	2.365	2.3804	2.1482	2.1349		8	2.2368	2.2716	2.1928	2.0774	2.208	2.2297	2.1987	2.0243	2.2404	2.126
2.22462	0.08113	2.23763	0.1072		9	2.1835	2.1374	2.3534	2.136	2.27	2.3124	2.1981	2.1978	2.3133	2.1443		9	2.4066	2.2018	2.2252	2.2585	2.0836	2.2013	2.3474	2.0661	2.3066	2.2792
2.2364	0.0959529	2.2279	0.104787		10	2.2574	2.0273	2.3775	2.2796	2.231	2.151	2.2953	2.2227	2.3097	2.2125		10	2.3028	2.2287	2.2121	2.1925	2.128	2.2501	2.081	2.1677	2.4633	2.2528
2.20599	0.144339	2.18111	0.0912812		11	2.1808	2.0117	2.4514	2.0756	2.2087	2.1414	2.4395	2.1369	2.2718	2.1421		11	2.2836	2.2023	2.0694	2.2858	2.0609	2.1771	2.1564	2.1042	2.3183	2.1531
2.16761	0.119536	2.1578	0.0863152		12	2.3473	1.9882	2.2435	2.0515	2.0803	2.0455	2.1868	2.2785	2.2631	2.1914		12	2.1101	2.2546	2.1227	2.0874	2.1636	2.1049	2.3433	2.0863	2.2109	2.0942
2.17303	0.112299	2.12365	0.0787448		13	2.18	2.1629	2.3551	2.2587	2.1055	2.1287	1.9362	2.1791	2.1522	2.2719		13	2.193	2.0644	2.2001	2.1521	2.2329	2.0804	1.9731	2.0931	2.0823	2.1651
2.17483	0.118344	2.17246	0.130006		14	2.224	2.1044	2.4578	2.0282	2.1256	2.0748	2.2406	2.1628	2.1669	2.1632		14	2.3828	2.2041	2.2705	2.0369	2.2971	2.0451	2.0372	2.0153	2.2146	2.221
2.17529	0.145245	2.16307	0.155419		15	2.2448	2.0442	2.511	2.1941	2.1302	1.9984	2.2573	2.0865	2.1922	2.0942		15	2.3828	2.4091	2.2221	2.0581	2.0871	2.0255	2.2443	1.9359	2.0645	2.2013
2.15946	0.145096	2.1145	0.0827125		16	2.3051	1.9346	2.3465	2.2078	2.2352	2.3312	2.0186	2.1023	2.0779	2.0354		16	2.0825	2.1693	2.1475	2.1505	2.1906	2.0252	2.1531	1.9774	2.0222	2.2267
2.15827	0.0966872	2.1656	0.0836267		17	2.2446	2.1756	2.2917	2.098	2.2297	2.0502	1.9842	2.2371	2.1179	2.1537		17	2.2196	2.274	2.1745	2.1861	2.2135	2.2196	2.2001	1.9961	2.0913	2.0812
2.1434	0.0942065	2.07983	0.0661404		18	2.2473	2.2759	2.2707	2.0812	2.1952	2.0594	2.0545	2.115	2.0943	2.0405		18	2.0978	2.1512	2.1662	1.998	2.071	2.025	2.1431	1.968	2.0847	2.0933
2.16873	0.0944831	2.13349	0.0697692		19	2.2191	2.1591	2.2368	2.0899	2.1223	2.1149	2.1024	2.0853	2.1642	2.3933		19	2.2177	2.2439	2.1176	2.083	2.0273	2.1041	2.1529	2.0514	2.1654	2.1716
2.14844	0.0982626	2.12013	0.0761327		20	2.2991	2.1984	2.3	2.0567	2.2064	2.1187	2.0294	2.087	2.1281	2.0606		20	2.1629	2.1304	2.0999	2.0114	2.1343	2.2505	2.1631	2.0895	2.1655	1.9938
2.12986	0.0742951	2.09844	0.0682654		21	2.1976	2.1639	2.2517	2.0364	2.0004	2.163	2.0855	2.1514	2.1243	2.1244		21	2.143	2.1037	2.1007	2.0706	2.1538	2.1268	2.0683	2.1885	2.0925	1.9365
2.09384	0.0643434	2.09662	0.0583619		22	2.1215	2.0695	2.1489	2.0522	1.9612	2.1637	2.0276	2.1327	2.1365	2.1246		22	2.2088	2.0894	2.0637	2.0515	2.1065	2.1085	2.1409	2.0307	2.1463	2.0199
2.10947	0.0969841	2.10946	0.0801093		23	2.1844	2.0426	2.1885	2.2894	2.1215	2.1359	2.117	1.9664	2.0162	2.0328		23	2.1718	2.1799	2.1105	2.0083	2.099	2.0788	2.2204	2.0041	2.0266	2.1952
2.12148	0.101189	2.0662	0.0780149		24	2.2685	2.1029	2.2514	2.2548	2.0722	2.0622	2.126	2.062	2.0096	2.0052		24	2.0481	2.211	2.1194	1.9678	2.1329	2.0204	2.0143	2.0796	2.1032	1.9653
2.10871	0.0884158	2.08421	0.0599706		25	2.1382	2.1214	2.1528	2.0218	2.1402	2.2984	1.9792	2.0422	2.1225	2.0704		25	2.0412	2.1213	2.0904	2.0244	1.9575	2.1312	2.155	2.0867	2.1231	2.1113
2.09341	0.0795751	2.07991	0.040998		26	2.149	2.0711	2.2541	2.0101	2.0951	2.0371	2.1026	1.9932	2.1689	2.0529		26	2.0578	2.0519	2.1308	2.1582	2.0218	2.0927	2.0736	2.0885	2.0823	2.0415
2.12692	0.100952	2.09989	0.0502495		27	2.3657	2.0741	2.1868	2.2017	2.1311	2.0813	2.0654	2.0296	2.0583	2.0752		27	2.1044	2.0785	2.1087	2.072	2.0164	2.2028	2.1273	2.1259	2.1108	2.0521
2.07376	0.101501	2.06754	0.0696		28	2.0774	1.9574	2.2379	1.9755	2.1313	2.167	2.0155	2.1875	1.9664	2.0217		28	2.0555	2.0695	2.1748	2.1232	2.1374	2.1097	1.9973	2.0381	1.9479	2.022
2.0684	0.113618	2.11268	0.0712949		29	2.068	2.0044	2.283	2.2391	1.9372	1.9632	2.0568	2.059	1.9802	2.0931		29	2.1925	2.2224	2.1547	2.0555	2.0893	2.1226	2.1104	1.9666	2.1172	2.0956
2.10492	0.102982	2.09558	0.064697		30	2.2066	2.0652	2.2961	2.078	2.0103	2.2229	1.9682	2.0659	2.0531	2.0829		30	2.1174	2.1893	2.1897	1.9953	2.1356	2.0966	2.0227	2.0884	2.0551	2.0657
2.13596	0.104894	2.04696	0.065912		31	2.1237	2.1538	2.3315	2.1805	2.0681	2.2257	1.9265	2.1271	2.0953	2.1274		31	2.1695	2.1342	1.9808	1.9793	2.0003	2.089	2.0456	2.0592	2.0104	2.0013
2.11553	0.112797	2.04753	0.0640975		32	2.2417	2.1368	2.3036	2.1786	2.1812	2.0305	1.9482	2.0311	2.0071	2.0965		32	2.0531	2.0298	2.1244	2.0071	2.0505	2.1837	2.0533	2.0149	1.9717	1.9868
2.09754	0.0705822	2.05623	0.0726958		33	2.1562	2.0712	2.1466	2.0219	2.0264	2.0422	2.0254	2.2149	2.0991	2.1715		33	1.9782	2.1272	2.002	1.9997	1.9829	2.0437	2.0513	2.1046	2.2055	2.0672
2.0274	0.0937172	2.04091	0.0705507		34	2.1072	1.9665	2.2156	2.0441	1.9151	2.1037	1.9328	1.9619	2.0382	1.9889		34	2.0959	2.1084	2.0814	1.9084	2.0622	2.1138	2.0674	1.9867	1.9482	2.0367
2.08185	0.0846853	2.03944	0.0903295		35	2.1801	2.0629	2.1886	2.1221	1.912	2.0109	2.157	2.0492	2.0516	2.0841		35	2.1172	1.9725	2.1351	2.0472	2.0986	2.1597	2.0223	2.0231	1.9351	1.8836
2.04608	0.0818361	2.06141	0.100837		36	2.0933	2.1003	2.0223	1.8484	2.1463	2.0371	2.0897	1.9983	2.0451	2.08		36	2.0768	2.1146	2.2308	1.9962	1.9814	2.1213	2.096	1.8549	2.0983	2.0438
2.08501	0.0731474	2.10446	0.0831697		37	2.1947	2.0675	2.1092	2.1009	2.0983	2.1232	1.9268	2.0425	2.0371	2.1499		37	2.2275	2.1272	2.029	2.1308	2.074	1.9606	2.0651	2.1607	2.0573	2.2124
2.06486	0.119163	2.06017	0.0840384		38	2.062	1.9393	2.1165	1.9555	2.3018	2.089	1.9233	2.0712	2.1919	1.9981		38	1.992	2.0171	2.1942	2.085	2.1433	2.0432	2.122	1.9006	2.0827	2.0216
2.0761	0.112729	2.0663	0.0567509		39	2.0812	2.0123	2.2517	1.9331	1.9734	2.0703	2.0229	2.1	2.0324	2.2837		39	2.117	2.1129	2.0373	2.0135	2.0367	2.1052	2.1106	2.1086	2.0749	1.9463
2.05568	0.100609	2.02458	0.060663		40	2.1798	1.9858	2.2733	1.9812	2.0378	2.0755	1.9526	1.9876	2.0139	2.0693		40	1.9938	1.978	2.0126	2.002	2.0566	1.9676	1.9721	2.1573	2.0135	2.0923
2.04937	0.0968587	2.08107	0.0856023		41	2.0595	2.0209	2.2438	1.9847	2.0506	2.1902	2.0406	1.9848	1.9345	1.9841		41	2.0792	2.1001	2.1642	2.1407	2.1007	1.9872	2.0331	2.231	2.0293	1.9452
2.05467	0.101352	2.06767	0.0625903		42	2.0742	1.9809	2.3158	1.9797	1.9884	2.0686	2.0765	2.0423	1.9675	2.0528		42	2.0589	2.1573	2.1123	2.0424	2.0771	2.063	2.1056	1.9602	1.9765	2.1234
2.05364	0.0837121	2.03277	0.0787293		43	2.0909	2.0897	2.1528	2.0204	2.173	2.0567	2.0143	1.9444	2.0846	1.9096		43	2.1039	2.0142	2.0708	2.0759	2.0386	2.0322	2.1577	1.8751	1.9581	2.0012
2.03089	0.0836502	2.00797	0.0370934		44	2.1236	1.9409	2.1987	2.0397	2.0006	1.9145	1.9956	2.0711	2.0146	2.0096		44	1.9447	2.0035	2.065	2.0283	2.0221	1.9904	2.0319	1.9512	2.0255	2.0171
2.03301	0.055785	2.06742	0.0883512		45	2.0508	2.0799	1.9998	1.965	2.0489	2.1366	2.0527	2.0383	1.9434	2.0147		45	2.052	2.2674	2.1098	2.0373	2.0009	2.0115	2.0651	2.0354	2.1421	1.9527
2.01425	0.0778206	2.02024	0.0344418		46	2.0138	1.9822	2.111	2.0044	1.9807	1.846	2.0887	1.9703	2.0845	2.0609		46	2.0716	2.0384	2.0672	2.0053	2.0364	1.9564	2.0195	2.0027	2.0035	2.0014
2.07688	0.094443	2.09386	0.0703462		47	2.1262	2.1446	2.149	2.085	2.2572	1.9548	2.0319	1.9699	2.0546	1.9956		47	2.0741	2.2465	2.1664	2.1172	2.0051	2.0921	2.0683	2.0772	2.0743	2.0174
2.06252	0.079107	2.0452	0.0749081		48	2.162	2.0344	2.0518	2.0473	2.1684	2.0974	2.0751	2.0322	1.8845	2.0721		48	2.0106	2.1043	2.0858	2.1322	2.102	1.9464	2.1347	1.9678	2.0168	1.9514
2.05937	0.0591982	2.00294	0.04016		49	2.1561	2.0867	2.0095	1.9665	2.11	2.0944	2.029	2.0067	2.0306	2.1042		49	1.9843	1.9852	2.0726	2.0598	2.0096	1.9455	2.0156	1.9618	1.9815	2.0135
2.03134	0.0992087	2.0475	0.0670081		50	2.0951	1.9815	2.2409	1.9254	1.9821	1.9246	2.1368	1.9993	2.0013	2.0264		50	1.9393	2.0909	2.1831	2.0248	2.0366	2.1055	1.9953	2.0591	2.0137	2.0267
2.02069	0.0743802	2.05176	0.0568765		51	2.1243	2.0529	2.0395	2.0368	1.9224	2.1169	2.0174	1.8887	2.0198	1.9882		51	2.0236	1.9725	2.0677	2.0263	2.1679	2.0489	2.019	2.0961	2	2.0956
2.03724	0.0871723	1.98893	0.0530063		52	2.1211	1.9835	2.1284	1.9663	2.1541	2.0806	2.0725	1.921	1.9157	2.0292		52	2.0381	2.0867	1.9851	1.9083	2.0145	1.9777	1.9689	1.9277	1.9607	2.0216
1.95613	0.0822761	2.03222	0.0936757		53	2.045	1.8356	2.0237	1.9101	1.95	1.9147	1.8873	2.0715	1.8844	2.039		53	2.0378	2.0976	2.2538	1.9812	2.0437	1.9132	2.0362	1.9595	2.0245	1.9747
2.02254	0.0841939	2.00331	0.0410354		54	2.1684	1.9653	2.1013	1.9503	2.0568	2.0208	2.0592	1.9015	1.9312	2.0706		54	1.9665	1.9643	2.0697	1.9671	2.0347	1.9978	1.9978	2.0404	1.9523	2.0425
1.98289	0.0657363	2.0121	0.0736214		55	2.0583	1.9856	2.0649	1.9056	1.922	2.063	1.9504	1.8922	2.0143	1.9726		55	1.9765	2.1491	2.0087	2.0013	1.9197	1.9937	2.0802	1.9832	2.0884	1.9202
2.00615	0.0989061	2.03357	0.0678798		56	2.0287	1.9155	2.0966	2.0648	1.9269	2.0785	1.8575	1.9874	1.9316	2.174		56	2.1231	1.9501	2.0435	2.0093	2.0352	2.1336	1.9522	2.0061	1.9769	2.1057
1.96729	0.053402	1.99835	0.0636659		57	2.0276	1.9602	2	1.9244	1.9985	1.9432	1.9429	1.8913	1.9221	2.0627		57	1.9864	2.0635	2.0538	1.9368	2.1113	1.9583	1.9598	2.0287	1.9757	1.9092
1.96456	0.069103	2.02775	0.0597011		58	1.9995	1.9618	2.1117	1.991	1.8873	2.009	1.8856	1.9515	1.9539	1.8943		58	2.1041	2.0889	2.0867	2.0262	1.9886	1.9424	1.9742	2.0815	2.0238	1.9611
1.98009	0.044383	1.96957	0.0491247		59	1.9553	1.9089	2.0464	1.9932	2.0455	2.0036	1.9504	1.979	1.9805	1.9381		59	1.9864	2.0079	1.9947	1.9818	1.9615	1.9826	1.9932	1.8391	2	1.9485
2.01146	0.0736759	2.00133	0.0668168		60	2.0301	1.96	2.0191	1.9908	2.1646	1.9887	1.9061	1.9403	2.035	2.0799		60	2.0554	2.0524	2.1114	2.0308	2.0271	1.9454	1.883	1.9834	1.9778	1.9466
2.00151	0.0911036	1.99123	0.0747277		61	2.0101	2.0682	2.1883	1.9344	2.0107	1.8767	1.9618	1.9711	1.9176	2.0762		61	1.957	2.0261	2.0715	2.0262	1.9952	1.8689	2.0749	2.0634	1.9396	1.8895
1.94287	0.0550924	1.98504	0.0398911		62	1.9292	1.8923	1.9627	1.9839	1.9851	1.8768	1.867	1.9988	2.0228	1.9101		62	2.0039	2.0562	2.0198	1.9865	1.9886	1.9652	1.9832	1.9965	1.926	1.9245
2.0329	0.0765105	2.0017	0.069464		63	1.9787	2.1085	2.1066	1.9431	1.9082	2.1272	2.0806	2.0428	1.9767	2.0566		63	2.0354	1.9453	2.0039	1.8407	2.0943	1.9928	2.0105	2.0153	2.0661	2.0127
2.01634	0.053893	2.04645	0.0411052		64	2.0709	1.9473	2.0789	1.985	2.013	2.0522	1.9529	1.9516	2.0349	2.0767		64	2.0604	2.058	2.1195	2.0225	1.9862	2.0733	2.0105	2.0801	2.0002	2.0538
1.99606	0.0598143	2.04794	0.0655374		65	2.0146	1.962	1.9742	2.0426	1.9704	2.1106	1.8951	2.0469	1.9853	1.9589		65	2.0722	1.9775	2.0491	2.1058	2.047	2.1256	2.1324	1.9249	2.0312	2.0137
2.02627	0.0741113	2.00302	0.0400357		66	2.12	2.1222	2.1019	2.0226	1.9535	1.9173	2.0272	1.9424	2.0552	2.0004		66	1.9638	1.9912	1.9937	1.9579	2.01	2.0451	2.0693	2.0261	2.0274	1.9457
1.99069	0.0591258	2.00014	0.0437403		67	2.0448	1.9924	2.054	2.0285	1.9773	1.8758	1.9454	2.0672	1.9637	1.9578		67	2.0191	2.0598	2.0353	1.9849	2.0221	2.0184	1.9882	2.0168	1.9407	1.9161
2.02275	0.080445	1.96848	0.0537068		68	2.0999	1.9082	2.1483	1.9985	2.0263	1.9803	1.93	1.9933	2.1297	2.013		68	2.0084	2.0292	1.9547	1.8714	1.9396	1.9856	1.9857	1.9291	2.0502	1.9309
1.97444	0.0680567	1.96469	0.0610605		69	2.0355	1.938	1.9389	1.8793	2.0157	2.0904	1.8962	1.9307	1.9922	2.0275		69	1.9279	2.0082	1.8518	2.0283	2.0222	2.0261	1.9188	2.0063	1.9271	1.9302
1.9883	0.0520266	1.95913	0.0645653		70	2.05	2.0312	1.9975	2.0782	1.9771	1.9556	1.916	1.9371	1.9907	1.9496		70	2.0105	1.9979	1.8736	1.8572	2.0312	1.9574	1.993	1.9919	2.0004	1.8782
1.99952	0.072899	1.96841	0.0694307		71	2.0793	2.0274	1.9861	1.9134	1.8885	2.0955	1.9729	2.0923	1.9854	1.9544		71	2.0449	1.9771	2.0079	1.8046	1.9233	1.9649	1.9649	2.0519	1.9706	1.974
1.99557	0.0683543	1.97673	0.113241		72	2.0736	2.0638	2.0266	1.9643	1.9664	1.9564	1.9446	2.0115	1.8665	2.082		72	1.9728	1.948	1.8156	1.7853	2.1472	2.046	1.9478	2.0036	2.1037	1.9973
1.97699	0.064501	1.95393	0.0562698		73	2.0881	1.8803	1.9535	2.0084	1.8843	2.0363	2.0065	1.9442	1.979	1.9893		73	1.9509	1.938	1.8916	1.8973	1.9755	1.9611	1.8906	2.0406	2.0489	1.9448
1.97364	0.0719253	1.95751	0.0560689		74	2.014	1.9919	2.0075	2.1002	1.8932	1.8597	1.9124	1.9362	2.0173	2.004		74	1.9406	1.8958	1.9491	1.9474	1.9734	1.9631	1.9749	1.9567	2.0912	1.8829
1.97136	0.0770919	1.9391	0.110534		75	1.9849	1.9783	2.0001	2.0444	1.9204	1.9965	1.7723	2.0175	1.9835	2.0157		75	1.8733	1.9612	1.7776	1.891	1.9212	1.8612	2.0961	2.1451	1.972	1.8923
1.95525	0.0647513	1.98013	0.066326		76	1.9928	1.864	2.04	1.9826	1.9639	1.9315	1.8491	2.0403	1.9257	1.9626		76	1.903	1.8969	1.941	1.9273	2.0084	2.0859	2.001	2.0237	2.0646	1.9495
1.94272	0.0493604	1.97559	0.0763681		77	1.9556	1.9318	1.91	2.0308	1.9739	1.9829	1.8498	1.9553	1.907	1.9301		77	1.9748	1.9389	1.8682	1.8585	2.04	1.9161	2.0405	2.0729	2.0189	2.0271
1.95138	0.0770337	1.93593	0.0776312		78	1.9639	2.0081	2.0226	1.9357	1.8205	1.8507	1.9781	1.915	1.9439	2.0753		78	1.9612	1.8622	1.9197	1.8465	2.034	1.8628	2.0612	1.9392	2.0042	1.8683
1.95239	0.0724543	1.94009	0.0553891		79	2.056	2.04	1.9711	1.8953	2.0506	1.8958	1.863	1.9387	1.9103	1.9031		79	1.8804	1.8597	1.9235	1.9426	1.9256	1.8807	1.9919	2.0165	1.9844	1.9956
1.93513	0.0728625	1.95754	0.0853142		80	1.9529	1.9018	1.8771	2.0016	1.9413	1.7717	1.9445	1.969	1.9554	2.036		80	1.9221	1.973	1.9258	1.8716	1.9328	1.9208	2.1645	1.9674	2.0214	1.876
1.98009	0.0437926	1.92519	0.03833		81	1.9839	1.9915	2.0437	1.8917	1.9713	2.0463	1.9686	1.9641	1.9599	1.9799		81	1.9415	2.0004	1.9041	1.9266	1.8777	1.9007	1.9674	1.9203	1.934	1.8792
1.95025	0.0693447	1.93851	0.0625176		82	2.0091	1.947	1.9398	2.0305	2.0621	1.884	1.8625	1.8959	1.8844	1.9872		82	1.8454	1.9286	1.9683	1.8769	1.9467	1.9693	1.9284	2.0269	2.0268	1.8678
1.94638	0.0574927	1.99315	0.06899		83	1.9724	1.9375	1.957	1.8947	1.8623	1.8699	2.0112	1.9445	1.978	2.0363		83	2.0184	1.9186	1.9749	1.9891	2.0228	2.1166	1.9213	2.0878	1.9235	1.9585
1.9299	0.0789398	1.95516	0.0562961		84	2.0239	1.9474	1.9145	2.0253	1.974	1.8352	2.003	1.7965	1.9019	1.8773		84	1.8828	1.8882	1.9657	1.9909	1.9769	1.9361	2.0109	2.0342	1.9888	1.8771
1.96039	0.102191	1.9822	0.0823052		85	1.9569	1.9633	2.0399	2.1737	1.8572	1.8335	1.8634	1.911	2.002	2.003		85	1.9108	1.917	2.1258	1.9326	1.9397	1.9649	2.12	2.0255	1.978	1.9077
1.97171	0.0727351	1.956	0.0610837		86	1.9893	1.989	1.912	1.8507	2.0947	1.9041	1.9645	1.986	1.9616	2.0652		86	1.9069	1.8962	1.9612	1.9899	2.0199	1.9336	2.0397	1.9696	1.9998	1.8432
1.97915	0.06643	1.97522	0.0785621		87	1.9506	1.9752	2.0099	2.0231	2.0669	1.938	1.8486	1.9161	2.0243	2.0388		87	1.8187	1.9737	2.1045	2.028	1.9275	1.9327	2.0549	1.9865	1.9444	1.9813
1.96194	0.0595307	1.975	0.0779527		88	2.0274	1.8798	1.9523	2.009	1.911	1.9638	2.0142	1.884	1.9356	2.0423		88	1.9038	1.8856	1.9866	1.8877	1.9907	1.9002	2.0896	2.0656	2.0563	1.9839
1.96949	0.0481966	1.97293	0.0722406		89	2.0309	2.0339	1.957	1.9053	1.9217	1.964	1.908	1.9778	1.9769	2.0194		89	1.9496	1.8862	2.008	1.9081	1.988	2.1118	2.0357	2.0118	1.9451	1.885
1.9769	0.0486544	1.97784	0.0808679		90	1.9766	1.9135	1.93	2.0714	1.9919	1.9867	1.9375	2.0251	1.9381	1.9982		90	1.9987	2.0086	2.027	1.8755	1.9866	1.9383	2.0794	1.9218	2.0925	1.85
1.96055	0.0599897	1.9582	0.0701364		91	1.9393	1.9567	1.9632	1.9872	2.0088	1.9363	1.9582	1.9517	1.8336	2.0705		91	1.9031	1.8799	1.9695	2.0291	1.8787	2.0093	2.0006	2.0648	1.9757	1.8713
1.95642	0.0604637	1.94499	0.0676183		92	1.9813	1.8708	2.0237	2.0084	1.9348	1.8559	1.9133	1.9713	1.9817	2.023		92	1.9121	1.8802	2.0568	1.946	1.9427	1.9019	1.9072	2.04	2.0046	1.8584
1.94288	0.0268251	1.9329	0.0470681		93	1.9446	1.9037	1.9525	1.9488	1.9937	1.9164	1.9311	1.9331	1.9289	1.976		93	1.9024	1.9203	2.0042	1.9389	1.9556	1.9096	1.9	1.9904	1.9612	1.8464
1.95597	0.0663326	1.96499	0.0681748		94	1.9343	2.0267	1.9527	1.9194	2.0906	1.8635	1.9311	1.9118	1.9237	2.0059		94	1.9378	1.9183	2.097	1.9631	1.9785	1.9647	2.008	1.9983	1.9542	1.83
1.95259	0.078908	1.97994	0.0684804		95	2.0017	1.879	1.9951	1.8954	2.0588	1.8464	2.021	1.8477	1.9585	2.0223		95	1.984	1.9261	2.0587	2.044	1.9645	1.9063	1.9507	2.0843	2.0054	1.8754
1.99568	0.104612	1.98101	0.0557361		96	1.9006	2.0002	1.8364	2.0121	2.1643	1.9909	2.0944	2.0074	1.8643	2.0862		96	1.9672	1.9247	2.0144	1.9904	1.9708	1.9548	1.9653	2.1189	1.9804	1.9232
1.94511	0.0683041	1.94101	0.0841484		97	2.0054	2.0099	2.0084	1.9174	1.9276	1.9682	1.8007	1.995	1.873	1.9455		97	1.8769	1.8437	1.9807	2.0952	1.9255	2.0189	1.8963	1.9881	1.9615	1.8233
1.97514	0.0754268	1.96364	0.0548226		98	1.9624	2.0258	1.9429	1.9499	1.9851	2.0045	2.1072	1.8072	1.9888	1.9776		98	1.9495	1.9021	1.9792	1.9936	1.877	2.0132	1.9923	1.9943	2.0389	1.8963
1.99079	0.054422	1.97938	0.0689857		99	2.0282	2.0094	1.9364	1.9678	1.9593	1.9971	2.0963	2.0147	1.8981	2.0006		99	1.8884	2.0342	2.0793	2.0535	1.9643	1.9324	1.8909	1.9657	2.0439	1.9412
1.95239	0.059606	1.97661	0.0752299		100	1.9499	1.96	1.8668	1.9886	1.853	2.0288	2.0096	1.9863	1.9782	1.9027		100	1.8678	2.0632	2.0595	1.8802	1.928	2.0054	1.9679	2.0811	1.9713	1.9417
1.96699	0.0733308	1.99626	0.0624067		101	1.8672	1.9974	1.9501	1.8964	2.1098	2.0251	1.9048	1.9183	1.9991	2.0017		101	2.0178	2.0491	2.1076	2.0493	1.8986	1.9777	1.94	1.9641	2.0102	1.9482
1.93566	0.0485584	2.00406	0.0718875		102	1.9078	1.9362	1.9144	1.9255	2.0289	1.9089	1.9004	1.8706	1.963	2.0009		102	1.9107	1.9621	2.1142	2.0265	2.0163	2.0039	1.992	2.0948	2.0342	1.8859
1.99567	0.0752239	1.97743	0.0610874		103	2.0014	1.9844	1.9518	1.9232	2.035	2.1633	2.0608	1.9557	1.9724	1.9087		103	1.967	1.9515	2.0503	2.0452	2.0472	1.9985	1.9977	1.8719	1.9244	1.9206
1.98618	0.068771	1.96129	0.0732975		104	1.9209	1.967	1.9763	1.9437	2.0784	1.9427	2.0842	1.9005	1.9701	2.078		104	1.9664	1.8913	2.1204	1.9981	1.9464	1.9351	1.939	1.9058	2.0333	1.8771
1.96532	0.0775454	1.99723	0.0743001		105	1.8458	1.9301	1.9962	1.9349	2.0425	2.1294	1.9062	1.9502	1.9629	1.955		105	1.9349	1.9662	2.192	1.9974	1.954	1.9845	1.9956	1.9891	2.0249	1.9337
1.99623	0.0814891	1.96338	0.067756		106	1.9034	1.9251	2.0214	2.0442	1.9449	2.0058	2.0215	1.9413	1.9687	2.186		106	1.8533	1.8945	2.0719	2.0263	1.9485	1.9616	1.9209	2.0445	1.9544	1.9579
1.97768	0.101368	1.98303	0.0876038		107	1.9017	1.8904	1.9294	2.1375	2.1471	1.876	1.984	2.0529	1.9582	1.8996		107	1.9711	1.949	2.013	2.1516	1.9557	2.1068	1.9866	1.914	1.8717	1.9108
1.99251	0.0684016	2.0196	0.0562651		108	1.9839	1.986	1.871	1.9829	2.1328	1.9308	2.0303	1.9695	2.0069	2.031		108	1.9949	2.0251	2.1649	2.002	2.05	1.965	2.0188	2.0033	1.9858	1.9862
1.99955	0.102996	1.99393	0.0653114		109	1.8722	1.8838	1.9069	1.892	2.1219	2.1381	2.0834	2.0296	2.0087	2.0589		109	2.0282	1.9612	2.1403	1.9284	1.948	1.9586	2.0421	1.9947	2.0107	1.9271
2.01777	0.0843225	1.99967	0.0650151		110	1.9517	1.9444	2.0478	1.8916	2.1007	2.0148	2.1808	2.0057	1.9765	2.0637		110	2.049	2.0148	2.0876	1.9929	2.0861	2.0225	1.9551	1.8983	1.9718	1.9186
2.04781	0.14759	2.032	0.120521		111	1.9778	1.8861	1.9734	1.9301	2.3529	2.1394	2.2287	1.9486	2.027	2.0141		111	1.9555	1.9681	2.1739	2.1816	1.916	2.0274	2.1568	2.1319	1.9622	1.8466
2.01461	0.0887494	1.97984	0.074003		112	1.9437	1.9563	2.0444	1.8467	2.0816	2.1462	2.0734	2.0352	1.9475	2.0711		112	1.8967	2.0452	2.0195	2.0841	1.9933	1.9681	1.9507	1.9755	2.0327	1.8326
2.00979	0.115562	1.98164	0.0688912		113	1.8671	1.9119	2.07	1.9382	2.1432	2.0138	2.148	1.8356	2.0469	2.1232		113	1.9763	2.0431	2.0078	1.9604	1.8438	2.0813	1.9549	2.0085	2.0299	1.9104
2.05166	0.11304	2.07298	0.0855587		114	1.9126	1.9812	1.995	2.0362	2.2631	2.0885	2.1922	1.9167	2.0279	2.1032		114	1.9935	2.009	2.1033	2.205	2.016	2.1233	2.0366	2.2147	2.0531	1.9753
2.0494	0.0949507	2.01346	0.071625		115	1.9831	2.0354	1.9342	1.9727	1.9501	2.2152	2.152	2.0798	2.0312	2.1403		115	1.9524	1.9399	2.1658	2.0968	1.9665	2.0171	2.0229	2.0321	1.987	1.9541
2.03021	0.106847	2.05044	0.14486		116	1.9365	1.944	2.0804	1.8676	2.1423	2.102	2.0895	1.9115	2.178	2.0503		116	2.0427	2.0232	2.3105	2.0423	2.0957	1.9374	1.8682	2.1753	2.1666	1.8425
2.01432	0.086587	2.03193	0.16316		117	2.0057	1.931	2.0853	1.8928	2.1892	1.9762	1.9655	2.0327	1.9812	2.0836		117	1.9246	1.9093	2.1925	2.1785	1.8906	1.9785	1.8489	2.3038	2.1788	1.9138
2.07091	0.120923	2.02646	0.101169		118	2.0192	2.0131	1.9987	1.9343	2.0289	2.3102	2.2141	1.9794	2.0301	2.1811		118	1.9649	1.931	2.1041	2.1838	2.0362	2.0334	1.9726	1.986	2.1742	1.8784
2.06906	0.133455	2.06187	0.0986634		119	2.0109	1.903	1.9374	1.9201	2.2041	2.2575	2.1882	1.9782	2.1764	2.1148		119	2.0134	2.0073	2.2264	2.0655	2.0433	2.0686	2.0012	2.1246	2.1853	1.8831
2.03955	0.0801453	2.02434	0.141001		120	2.0115	1.9327	2.0383	1.9138	2.1306	2.0845	2.0629	2.0803	1.9828	2.1581		120	1.9254	2.0211	2.2186	2.0804	1.9356	2.0184	1.9358	2.0828	2.2459	1.7794
2.10254	0.119484	2.03732	0.104708		121	2.0253	2.0749	2.0748	2.0342	2.2299	2.0657	2.3446	1.9423	2.033	2.2007		121	1.9938	1.9173	2.1528	2.1416	1.9608	2.0218	1.9385	2.0821	2.2169	1.9476
2.08543	0.110411	2.07265	0.0900417		122	2.0522	2.0932	2.0975	1.9433	2.1316	2.1411	2.2765	1.9194	2.0036	2.1959		122	2.0412	2.1101	2.1096	2.0971	2.0405	1.9763	1.9997	2.061	2.2908	2.0002
2.07721	0.112067	2.04962	0.178067		123	2.0009	1.9653	1.9866	1.9775	2.2196	2.141	2.1881	1.9423	2.1407	2.2101		123	2.145	1.9788	2.1786	2.0404	1.9524	1.9219	2.0397	1.8725	2.4676	1.8993
2.11614	0.174849	2.02901	0.145471		124	1.9828	2.0808	2.0887	2.0219	2.4528	2.1386	2.1964	1.8724	1.987	2.34		124	2.0014	1.9529	2.1756	1.9951	1.9835	2.0477	1.9236	1.8949	2.3775	1.9379
2.0997	0.193831	2.02213	0.158237		125	2.0457	1.9727	1.984	1.9357	2.037	2.0717	2.5359	2.0279	2.0183	2.3681		125	1.9974	2.0105	2.0547	1.9994	1.8876	1.9655	1.9872	1.8906	2.4481	1.9803
2.05703	0.0900238	2.08218	0.183033		126	2.0622	2.0053	1.9669	2.0176	2.2	2.1296	2.1235	2.0351	1.9001	2.13		126	2.0879	1.9453	2.0875	2.0798	2.0057	2.0717	1.9523	2.0646	2.5748	1.9522
2.12508	0.145392	2.08084	0.153129		127	1.986	1.9985	2.1908	2.0595	2.1284	2.1586	2.3763	2.0293	1.9744	2.349		127	2.1566	1.981	2.1721	1.9883	1.9519	2.0032	2.0432	2.3053	2.3303	1.8765
2.15108	0.114628	2.0532	0.109527		128	2.0337	2.241	2.0861	2.0239	2.225	2.1737	2.267	2.0966	2.0211	2.3427		128	2.0252	2.121	2.1054	2.0466	2.0033	2.0178	1.955	2.2715	2.1187	1.8675
2.07805	0.129526	2.06283	0.148637		129	1.989	2.0962	2.1662	2.0124	1.9247	1.9275	2.1473	2.1787	2.0066	2.3319		129	2.0701	1.9722	2.1021	2.049	1.9478	1.9947	1.9532	2.1909	2.4168	1.9315
2.14088	0.15996	2.03569	0.115018		130	1.9808	2.0952	2.1093	2.0051	2.1386	2.1512	2.2405	2.0551	2.0884	2.5446		130	2.0269	1.933	2.1282	2.0204	1.9944	1.9786	1.9049	2.2406	2.1951	1.9348
2.13757	0.068225	2.09605	0.148837		131	2.1142	1.9981	2.1257	2.1452	2.1024	2.1728	2.2205	2.223	2.0867	2.1871		131	2.2857	2.0141	2.1003	2.0741	2.0704	1.9386	1.9549	2.214	2.3665	1.9419
2.12275	0.0993288	2.06223	0.0829588		132	2.1964	2.0401	2.068	1.933	2.2325	2.2005	2.2075	2.0353	2.1235	2.1907		132	2.0812	2.0944	2.1619	2.0168	1.9822	1.9831	2.0596	2.1798	2.1321	1.9312
2.13057	0.0907858	2.05565	0.104032		133	2.078	1.9793	2.101	2.1833	2.1473	2.2092	2.2792	2.0575	2.0615	2.2094		133	2.1769	2.1002	2.0852	1.9154	2.0103	1.9144	2.0356	2.222	2.1189	1.9776
2.1583	0.180205	2.07297	0.0952557		134	2.1052	2.1099	2.2083	2.0049	1.9608	2.2327	2.5469	2.151	1.9527	2.3106		134	2.0757	2.229	2.1705	1.9763	2.056	2.0818	2.0848	2.1233	2.0455	1.8868
2.14886	0.116953	2.11257	0.137889		135	2.2057	2.0137	2.1531	1.9828	2.0617	2.2974	2.2959	2.079	2.12	2.2793		135	2.056	2.1723	2.0064	2.1397	2.1613	1.9819	2.0682	2.3304	2.3089	1.9006
2.12472	0.121669	2.06367	0.102333		136	2.0985	2.025	2.1107	2.0006	1.9617	2.2236	2.3133	2.0766	2.1316	2.3056		136	1.9513	2.0772	2.0796	2.1474	1.957	1.9787	2.1435	2.2665	2.0616	1.9739
2.12443	0.0846258	2.0914	0.136654		137	2.1846	2.1552	2.2129	2.0465	2.1167	2.1432	2.2678	2.0139	2.0852	2.0183		137	2.0862	2.2178	2.0417	2.0553	2.079	2.0042	2.2655	2.2933	2.0376	1.8334
2.11394	0.105054	2.10786	0.0914991		138	2.235	2.0339	2.1042	2.067	1.9623	2.2865	2.0176	2.2296	2.1125	2.0908		138	1.9776	2.0615	2.0027	2.0045	2.0878	2.1937	2.1923	2.2026	2.1978	2.1581
2.11016	0.127411	2.10508	0.122279		139	2.0761	2.0328	2.132	1.976	2.4092	2.0564	2.1	2.2148	1.9801	2.1242		139	2.057	2.106	1.9926	1.9272	2.1556	2.0739	2.3053	2.2555	2.1918	1.9859
2.1649	0.100741	2.10717	0.0970599		140	2.2474	2.1092	2.0151	2.1727	2.0582	2.1327	2.206	2.3766	2.1658	2.1653		140	2.0703	2.0394	2.0096	2.121	2.1247	2.1274	2.1968	2.2768	2.1662	1.9395
2.10221	0.0976826	2.12799	0.0976114		141	2.1931	2.0182	2.2446	2.1132	1.9049	2.0483	2.1033	2.1081	2.0954	2.193		141	2.0576	2.0971	2.128	2.1991	2.0833	2.3603	2.1264	2.1191	2.1175	1.9915
2.11584	0.118243	2.16927	0.102166		142	2.0735	1.8977	2.1316	2.1987	2.2005	2.0308	2.2798	1.9923	2.2286	2.1249		142	2.1518	2.143	2.1202	2.063	2.316	2.2447	2.1613	2.3331	2.1473	2.0123
2.14512	0.0930185	2.10187	0.0810217		143	2.1566	2.2537	2.1757	2.0319	2.0768	2.2119	2.2475	1.9726	2.1957	2.1288		143	2.0767	2.1445	2.1015	1.9992	2.2613	2.061	2.1227	2.1565	2.1173	1.978
2.11528	0.0571925	2.13394	0.114166		144	2.0904	2.0677	2.1688	2.1754	2.1489	1.9841	2.1483	2.1056	2.1297	2.1339		144	2.0768	2.1347	2.0361	2.1416	2.3614	2.1789	2.11	2.2738	2.0384	1.9877
2.14925	0.191023	2.09759	0.0740338		145	2.0653	1.9818	2.0472	2.266	2.071	1.9259	2.6085	2.1779	2.186	2.1629		145	2.079	2.0887	2.0418	2.1005	2.1969	2.222	2.1515	2.0043	2.087	2.0042
2.09082	0.121905	2.10651	0.0812191		146	2.1206	1.9848	1.9365	2.071	1.9735	1.9957	2.2407	2.283	2.0883	2.2141		146	2.0786	2.158	2.0202	2.02	2.1199	2.2315	2.1506	2.1972	1.9839	2.1052
2.16275	0.0720526	2.10851	0.109238		147	2.1124	2.1484	2.2264	2.0755	2.0912	2.1564	2.2981	2.1453	2.1262	2.2476		147	2.0003	2.0205	2.108	2.0611	2.2911	2.262	2.0004	2.1775	2.0081	2.1561
2.16595	0.109979	2.06937	0.0853538		148	2.1025	2.0561	2.1569	2.0994	2.0997	2.3	2.3927	2.2103	2.0559	2.186		148	2.1165	2.0068	1.9099	2.0794	2.2264	2.0981	1.9901	2.076	2.1146	2.0759
2.14026	0.0790825	2.06879	0.0813696		149	2.1539	2.1368	2.1683	2.1363	1.9772	2.2644	2.2311	2.0776	2.1081	2.1489		149	2.1329	1.9896	1.9584	2.0423	2.1546	2.1155	2.1688	2.1307	2.0349	1.9602
2.04191	0.0788679	2.10211	0.0894587		150	2.0267	1.8825	2.007	2.119	1.9469	2.0891	2.0597	2.1252	2.0538	2.1092		150	2.143	2.1241	1.9639	1.9925	2.1308	2.1466	2.2454	2.1906	2.056	2.0282
2.08487	0.0607374	2.11616	0.050739		151	2.1288	2.0713	2.1725	2.0596	1.9795	1.9953	2.1184	2.0828	2.1227	2.1178		151	2.0976	2.2035	2.1411	2.0823	2.0989	2.0217	2.1672	2.1344	2.1311	2.0838
2.15822	0.137256	2.07562	0.0682701		152	2.1339	2.175	1.9415	2.1478	2.4251	1.9969	2.1067	2.2372	2.2808	2.1373		152	2.057	1.9802	2.1175	2.0936	2.1416	1.9875	2.0569	2.2062	2.0463	2.0694
2.11145	0.0582611	2.08029	0.062614		153	2.038	2.0262	2.1403	2.1499	2.0631	2.1278	2.1054	2.1152	2.2244	2.1242		153	2.0579	2.0689	2.1083	2.0846	2.0612	2.207	2.1321	2.0428	1.9649	2.0752
2.14986	0.0817688	2.074	0.0847731		154	2.1322	2.2387	2.0005	2.2105	2.2217	2.0975	2.1033	2.0918	2.1409	2.2615		154	2.1102	1.9319	2.1244	1.9998	2.2262	2.1598	2.0361	2.0822	2.037	2.0324
2.11356	0.108323	2.08357	0.085735		155	2.0763	2.1163	1.9841	1.9337	2.0421	2.1217	2.2679	2.2456	2.2002	2.1477		155	2.0185	2.1874	1.9672	2.1412	2.1497	2.089	1.9692	2.2059	2.0485	2.0591
2.14557	0.0696626	2.11053	0.0735651		156	2.1764	2.0836	2.093	2.0939	2.0601	2.2019	2.1282	2.2126	2.2791	2.1269		156	2.0102	2.0871	2.1412	2.2078	2.1411	2.1485	2.1828	1.99	2.1496	2.047
2.18435	0.0886871	2.05881	0.0765026		157	2.0542	2.0991	2.1304	2.2082	2.1894	2.3447	2.1588	2.1842	2.3118	2.1627		157	2.0299	1.9205	2.0076	2.1129	2.0746	1.9996	2.2044	2.101	2.0795	2.0581
2.12835	0.0564921	2.07919	0.10853		158	2.1089	2.1165	2.2178	2.0737	2.1349	2.0935	2.1505	2.0277	2.1791	2.1809		158	2.0694	1.9784	1.9889	2.0644	2.036	2.0878	2.3691	2.0849	2.0694	2.0436
2.1656	0.0940481	2.10579	0.0860975		159	2.2256	2.0941	2.2919	2.092	2.158	2.0444	2.3209	2.1751	2.1886	2.0654		159	2.1261	2.0719	2.1763	2.0214	2.2408	2.1001	2.0877	2.2094	2.0677	1.9565
2.15122	0.0837957	2.08945	0.049176		160	2.1037	2.0624	2.1491	2.0551	2.1679	2.0495	2.2464	2.1776	2.2066	2.2939		160	2.1709	2.0672	2.0498	2.0898	2.0569	2.0889	2.1002	2.0259	2.0692	2.1757
2.11936	0.0805027	2.13999	0.0934157		161	2.1123	2.1462	2.2717	2.0604	2.0974	2.1824	1.9836	2.0703	2.0841	2.1852		161	2.1882	2.0322	2.0544	2.2719	2.0334	2.0747	2.0914	2.2099	2.2642	2.1796
2.1103	0.0748098	2.10755	0.036096		162	2.1478	2.1357	2.0828	2.0021	2.0481	2.2088	2.051	2.088	2.2445	2.0942		162	2.0949	2.1743	2.1065	2.0738	2.1059	2.113	2.154	2.1136	2.0908	2.0487
2.13762	0.118337	2.09957	0.0891815		163	2.0928	2.0326	1.9072	2.0969	2.1683	2.1204	2.1736	2.2271	2.2157	2.3416		163	2.1632	2.1224	2.0196	2.1018	1.9995	2.1756	2.1049	2.1742	1.931	2.2035
2.11574	0.127093	2.07996	0.0809948		164	2.1786	2.0691	2.0003	2.1115	1.9774	1.9667	2.0961	2.1172	2.3042	2.3363		164	2.1358	2.0646	2.0116	1.9971	2.2024	2.1628	2.0618	2.0971	1.9402	2.1262
2.09451	0.0809571	2.09211	0.0586012		165	2.1947	2.0433	2.0005	2.0071	2.1905	2.0454	2.186	2.0874	2.0251	2.1651		165	2.1261	2.1003	2.0856	2.0253	2.1791	2.0087	2.0213	2.1127	2.0979	2.1641
2.12929	0.122301	2.15504	0.0768652		166	2.0654	2.06	2.0755	2.0704	1.9802	2.1689	2.0668	2.4102	2.2389	2.1566		166	2.0914	2.275	2.1585	2.1784	2.0245	2.1226	2.1637	2.2394	2.0821	2.2148
2.19206	0.144569	2.13325	0.0891439		167	2.1259	2.0224	2.024	2.0737	2.2152	2.1244	2.4363	2.3477	2.2056	2.3454		167	2.2205	1.984	2.1607	2.1613	2.0899	2.174	2.2793	2.0507	2.0472	2.1649
2.10118	0.106893	2.10013	0.0797342		168	2.14	1.944	1.9341	2.1799	2.0837	2.0186	2.0915	2.2422	2.1916	2.1862		168	2.0953	2.1127	2.0387	2.1555	2.0322	2.0459	2.1782	2.245	2.1207	1.9771
2.16463	0.145452	2.08201	0.0876258		169	2.0537	2.1593	2.0505	2.0474	2.0396	2.1025	2.5043	2.2624	2.1806	2.246		169	2.1599	2.1884	1.9971	2.0918	2.0577	2.2158	2.106	2.0124	2.0481	1.9429
2.1115	0.0903667	2.11428	0.0938216		170	2.08	2.1203	2.0728	2.0285	1.9826	2.1465	2.253	2.0355	2.1456	2.2502		170	2.1092	1.971	2.1107	2.1154	2.0147	2.2059	2.1948	2.2859	2.0725	2.0627
2.16897	0.110975	2.11441	0.0638256		171	2.0688	2.0574	2.0677	2.0959	2.2263	2.0793	2.3181	2.1891	2.3558	2.2313		171	2.0929	2.1614	2.131	2.1747	2.0363	2.1553	2.1716	2.1625	1.996	2.0624
2.13332	0.115561	2.10873	0.0689105		172	2.1445	1.9386	2.1953	2.14	2.2131	2.2602	2.1623	2.0274	2.2736	1.9782		172	2.1258	2.1611	2.1417	2.1089	2.0817	2.2388	2.0292	2.0902	1.9897	2.1202
2.12831	0.0602902	2.07619	0.07599		173	2.1583	2.1433	2.0926	2.0792	2.1333	2.1621	2.0151	2.1971	2.0872	2.2149		173	2.0924	2.0955	1.9615	2.0908	2.0514	2.1759	2.0956	2.1913	1.9632	2.0443
2.11059	0.0986456	2.10786	0.0855785		174	1.9863	2.0246	2.0894	2.1795	2.2239	2.0344	2.2806	2.0095	2.1295	2.1482		174	2.0534	2.1143	2.0047	2.0597	2.0959	2.1306	2.2576	2.2264	2.1374	1.9986
2.13081	0.109459	2.08437	0.0940333		175	2.1229	2.1497	2.0866	1.9734	2.0184	2.0896	2.2433	2.1076	2.3599	2.1567		175	2.0572	2.103	2.016	2.0497	2.1889	2.002	2.1617	2.236	1.9246	2.1046
2.12105	0.104413	2.11243	0.0798387		176	2.0838	2.1637	2.0468	2.0588	2.0861	2.0059	2.1635	2.0325	2.3473	2.2221		176	2.1759	2.2853	2.0694	2.0429	2.0951	2.1817	2.1087	2.0891	2.0437	2.0325
2.15641	0.0520431	2.10928	0.0575426		177	2.1705	2.1107	2.1587	2.0338	2.1701	2.1762	2.1588	2.2111	2.1589	2.2153		177	2.2025	2.0498	2.0184	2.0635	2.1465	2.1183	2.1339	2.1635	2.0669	2.1295
