# Supplementary material for: Hypoxia controls plasma membrane targeting of polarity proteins by dynamic turnover of PI4P and PI(4,5)P2
Source: eLife. 2022 Jun 9;11:e79582. doi: 10.7554/eLife.79582 (PMC9242647; doi:10.7554/eLife.79582)
Supplement: Figure 3—source data 6. [file elife-79582-fig3-data6.xlsx]

## Sheet: Figure 3-fig sup 1 PLC-PH-GFP
Figure 3 Souce Data 6
						1	2	3	4	5	6	7	8	9	10	11	12	13	14			1	2	3	4	5	6	7	8	9	10	11	12	13	14	15	16	17	18	19
WT		RNAi			WT
AVG	STDEV	AVG	STDEV																		RNAi
t_C2_PM/Cy	t_C2_PM/Cy	t_C2_PM/Cy	t_C2_PM/Cy		min	t_C2_PM/Cy	t_C2_PM/Cy	t_C2_PM/Cy	t_C2_PM/Cy	t_C2_PM/Cy	t_C2_PM/Cy	t_C2_PM/Cy	t_C2_PM/Cy	t_C2_PM/Cy	t_C2_PM/Cy	t_C2_PM/Cy	t_C2_PM/Cy	t_C2_PM/Cy	t_C2_PM/Cy		min	t_C2_PM/Cy	t_C2_PM/Cy	t_C2_PM/Cy	t_C2_PM/Cy	t_C2_PM/Cy	t_C2_PM/Cy	t_C2_PM/Cy	t_C2_PM/Cy	t_C2_PM/Cy	t_C2_PM/Cy	t_C2_PM/Cy	t_C2_PM/Cy	t_C2_PM/Cy	t_C2_PM/Cy	t_C2_PM/Cy	t_C2_PM/Cy	t_C2_PM/Cy	t_C2_PM/Cy	t_C2_PM/Cy
0.926164	0.0730247	0.925916	0.0881752		1	0.9871	0.9871	0.9756	0.9689	0.8627	0.9434	0.8355	0.9926	0.8231	0.9572	1.0148	0.781	0.9232	0.9141		1	1.0896	0.7932	0.8887	0.8173	0.8564	0.9722	0.9739	0.9794	0.9147	0.9908	0.992	0.9974	0.8274	0.8113	1.017	0.8644	0.8682	0.8844	1.0541
0.962779	0.058738	0.970126	0.0638069		2	0.9702	1.0044	0.9529	1.0167	0.9172	0.9936	0.947	1.0873	0.8505	1.0184	0.9609	0.9165	0.9266	0.9167		2	1.0274	0.9477	0.9866	0.9565	0.9565	1.0156	0.9643	0.9814	0.9951	1.0369	0.898	0.9578	0.9024	0.9261	0.995	0.8918	0.9427	0.891	1.1596
1.00679	0.0591875	0.980947	0.0781343		3	0.9976	0.9207	0.9676	1.0986	1.0026	0.9137	1.0991	1.048	1.0099	0.9977	0.9884	1.0548	0.9421	1.0543		3	0.8556	0.9577	1.0385	1.004	1.0435	0.9571	1.0044	0.9357	1.0213	1.0598	1.0178	0.9871	1.1479	0.8276	0.9761	0.9269	1.0658	0.9227	0.8885
1.05036	0.053841	1.05521	0.0761722		4	1.052	1.0916	1.0862	0.9452	1.0436	0.9798	1.0695	0.96	1.1233	1.0928	1.0646	1.1	1.0602	1.0363		4	1.0252	1.1405	1.0566	1.0282	1.0963	1.0545	1.0099	1.1277	1.027	0.9491	1.0626	0.9676	1.1117	1.2139	1.0207	1.1223	1.0689	1.0883	0.878
1.05391	0.096863	1.06779	0.0850349		5	0.9931	0.9962	1.0176	0.9706	1.1738	1.1696	1.0489	0.9121	1.1931	0.934	0.9714	1.1476	1.1479	1.0788		5	1.0023	1.1609	1.0296	1.1939	1.0473	1.0007	1.0476	0.9757	1.0419	0.9634	1.0296	1.09	1.0106	1.2211	0.9911	1.1947	1.0543	1.2136	1.0198
1.05634	0.105822	1.03554	0.11522		6	1.0202	1.0362	1.0482	1.0322	1.1349	1.0441	0.9571	0.974	1.2648	0.8267	1.0388	1.173	1.1527	1.0859		6	1.0565	1.0819	0.9462	1.326	0.9566	1.0411	0.9968	0.849	1.0214	0.925	0.9962	1.0909	1.043	1.2928	0.9718	1.1006	0.939	1.0277	1.0128
1.00481	0.113073	0.991816	0.136204		7	1.053	0.8439	0.8918	1.2557	1.084	0.937	1.0479	0.9824	1.0695	0.8011	1.0042	1.059	1.0149	1.023		7	1.0174	0.9639	0.8711	1.2691	0.991	0.8995	0.9043	0.874	1.01	0.8282	0.9401	1.0844	1.0373	1.3585	1.0375	1.049	0.9004	0.8448	0.964
0.981386	0.0998829	0.985958	0.103863		8	0.9272	0.9026	1.0358	0.8795	1.0601	0.8088	1.0131	1.167	0.9964	0.9111	0.9744	1.1428	1.0028	0.9178		8	1.0609	0.864	0.9277	0.9558	0.9639	1.0956	0.8711	0.9981	1.0071	0.8749	1.0714	1.19	0.8631	1.0591	1.0706	1.1421	0.8592	0.8687	0.9899
0.97485	0.115153	0.975274	0.124764		9	0.9523	0.7435	0.9688	0.8587	0.863	0.8794	0.998	1.0657	1.1904	1.0579	1.0032	1.092	1.0432	0.9318		9	1.0477	0.8183	0.8769	1.0069	1.1889	1.0171	0.8656	0.8952	1.1143	0.8848	1.0363	1.0517	0.9499	1.1584	1.1159	1.0055	0.8575	0.7208	0.9185
0.959036	0.111953	0.969474	0.106897		10	0.9317	0.8231	0.8931	1.0588	0.967	0.8732	0.8202	1.0128	1.2089	1.1268	0.9884	0.9146	0.8911	0.9168		10	1.0296	0.9792	0.9061	0.99	0.9847	0.8864	0.8857	0.9026	1.1604	0.7993	0.9087	0.9541	0.9336	1.2516	1.0426	1.065	0.9691	0.8947	0.8766
0.910307	0.110545	0.944705	0.137907		11	0.9111	0.8361	0.9956	0.7717	0.8423	0.8108	0.8896	0.998	1.1539	0.819	0.9304	0.9242	1.0633	0.7983		11	1.1159	0.9425	0.8523	0.8296	0.9978	0.9582	0.8708	0.9265	1.0989	0.8476	1.0605	0.9304	0.7969	0.9442	1.2771	1.0919	0.7539	0.7334	0.921
0.920386	0.108046	0.923495	0.106109		12	0.9804	0.9098	0.9888	0.8124	0.9517	0.7451	0.9996	1.0385	1.0803	0.9559	0.8515	0.9227	0.9463	0.7024		12	1.0242	1.0442	0.8804	1.0354	1.0019	0.9569	0.7776	0.9174	1.0082	0.7901	0.9301	0.8226	0.815	0.9737	1.0464	1.0492	0.8035	0.7242	0.9454
0.914357	0.129389	0.903011	0.1151		13	0.8342	0.9368	0.9997	0.7336	0.8898	0.8054	0.8823	1.1866	1.1507	0.8934	0.8332	0.9129	0.9621	0.7803		13	0.9165	0.8731	0.8976	1.0252	0.9469	0.8549	0.8203	0.8384	0.9547	0.9164	1.005	0.7923	0.752	0.9372	1.0066	1.2279	0.7939	0.7362	0.8621
0.900564	0.119853	0.914984	0.109989		14	0.9883	0.7749	0.8732	0.6546	0.8298	0.8186	0.9676	0.975	1.0462	0.7918	1.066	0.9394	1.0279	0.8546		14	0.9553	0.9146	0.9328	1.0189	0.8595	0.9912	0.8065	0.9669	0.9532	0.95	0.8488	0.9176	0.6996	0.959	1.0826	1.1463	0.7795	0.7869	0.8155
0.931071	0.130406	0.928553	0.128871		15	0.9179	0.9092	0.972	0.7399	0.805	0.9816	0.962	1.1412	1.2017	0.8654	0.9625	0.7655	0.981	0.8301		15	1.1028	0.9696	0.8865	0.9593	0.8922	0.8328	0.8309	1.0327	1.018	0.842	0.9884	0.7472	0.833	1.1704	1.0806	1.0938	0.8183	0.7394	0.8046
0.952171	0.120044	0.9155	0.10769		16	0.9306	0.9431	0.9267	0.8243	0.7828	0.8876	0.931	1.1513	1.1785	0.9009	0.9436	1.0043	1.1042	0.8215		16	1.0091	0.869	0.8898	0.9813	0.8928	1.0253	0.7205	0.9914	0.9703	0.8401	1.1281	0.8583	0.7635	1.0084	0.9948	0.974	0.7479	0.8166	0.9133
0.937457	0.111183	0.913379	0.0956751		17	1.1649	0.7866	1.0126	0.9023	0.9255	0.8772	0.8774	0.9116	1.0008	0.9017	0.8579	1.1115	1.0115	0.7829		17	0.9587	0.9771	0.8628	0.9345	0.8741	0.7833	0.7586	0.9251	1.0467	0.9031	1.0752	0.9162	0.8617	0.9807	1.0076	1.0533	0.8151	0.7755	0.8449
0.965164	0.0861803	0.903311	0.115893		18	0.9701	0.834	1.0563	0.9107	0.9084	1.0028	0.973	0.9845	1.1274	0.865	0.8899	0.975	1.1005	0.9147		18	0.8819	0.8446	0.9181	0.997	0.851	0.8964	0.6946	0.9364	1.04	0.9237	1.022	0.7896	0.7352	0.9897	1.0707	1.1185	0.8625	0.7824	0.8086
0.922486	0.107689	0.921668	0.0881058		19	0.9085	0.6657	0.9541	0.8217	0.9799	1.043	0.856	0.977	1.0327	0.9978	0.8792	1.02	0.9815	0.7977		19	0.9145	0.9332	0.8947	0.8832	0.9023	0.8943	0.768	0.9925	1.0917	1.0289	1.0019	0.772	0.8564	1.0384	0.9389	0.9936	0.84	0.8316	0.9356
0.907793	0.119833	0.880542	0.113157		20	0.7899	0.7643	0.954	0.7766	0.8069	0.9227	0.8939	1.0514	1.0211	1.1183	0.7929	1.0025	1.0129	0.8017		20	0.9324	0.8359	0.8505	0.8662	0.9065	0.8715	0.7271	0.8549	1.0707	0.8463	0.9624	0.9984	0.724	1.0952	0.8902	0.9991	0.7177	0.7058	0.8755
0.8812	0.0911646	0.834142	0.1186		21	0.7766	0.752	0.9833	0.8307	0.751	0.9648	0.8215	0.9496	0.9634	0.9438	0.8878	0.8148	1.0229	0.8746		21	0.8529	0.9028	0.7655	0.8186	0.7513	0.9179	0.6236	0.9106	0.8848	0.935	0.9891	0.7292	0.6868	0.9753	1.0406	0.9095	0.7136	0.7452	0.6964
0.873286	0.0973143	0.816358	0.10739		22	0.7303	0.6855	0.9556	0.825	0.8	1.0247	0.856	0.9696	0.8798	0.9206	0.8341	0.8754	1.002	0.8674		22	0.8454	0.8	0.8087	0.8044	0.763	0.8186	0.6206	0.8759	0.9606	0.7445	0.9779	0.8173	0.7088	0.9281	0.9365	0.9936	0.7208	0.6977	0.6884
0.869721	0.0727331	0.818911	0.105976		23	0.7748	0.7572	0.958	0.8243	0.8278	1.0046	0.8031	0.9101	0.8896	0.9058	0.8665	0.9047	0.939	0.8106		23	0.831	0.813	0.7556	0.8025	0.8587	0.806	0.7024	0.8056	1.0355	0.774	0.9214	0.8354	0.6462	0.9146	0.98	0.9585	0.7083	0.7087	0.7019
0.85015	0.097725	0.796942	0.0996153		24	0.7621	0.6385	0.9095	0.9014	0.7489	0.9961	0.7662	0.9149	0.8926	0.9122	0.838	0.9081	0.9387	0.7749		24	0.78	0.7441	0.712	0.8491	0.7692	0.7352	0.6903	0.7913	0.9896	0.7939	0.9355	0.868	0.6342	0.8775	0.9308	0.9068	0.6777	0.6996	0.7571
0.827614	0.105296	0.762532	0.0991784		25	0.7465	0.6966	0.9375	0.7186	0.6514	0.9417	0.7587	0.8749	0.8947	0.9809	0.7813	0.9389	0.8699	0.795		25	0.7657	0.803	0.6712	0.7776	0.7486	0.6684	0.6165	0.6986	0.8684	0.9128	0.8768	0.8131	0.6435	0.8284	0.8697	0.8905	0.5811	0.7029	0.7513
0.833636	0.0877809	0.756953	0.11155		26	0.7399	0.647	0.9035	0.7797	0.7266	0.9177	0.7876	0.8616	0.9007	0.9135	0.7896	0.8775	0.9136	0.9124		26	0.7446	0.6572	0.667	0.8559	0.7361	0.6187	0.649	0.7714	0.8566	0.8203	0.8912	0.83	0.6377	0.9304	0.8729	0.9114	0.5967	0.6228	0.7122
0.807507	0.098425	0.734174	0.1145		27	0.6465	0.6616	0.8742	0.7224	0.7604	0.9954	0.7259	0.803	0.9075	0.8552	0.7927	0.8817	0.8768	0.8018		27	0.7613	0.6135	0.6902	0.8267	0.8005	0.5807	0.6395	0.7799	0.8302	0.714	0.9091	0.6635	0.5919	0.85	0.8964	0.9073	0.5818	0.6377	0.6751
0.783464	0.0833617	0.703479	0.104495		28	0.6887	0.6496	0.8494	0.6936	0.7159	0.9301	0.7164	0.8396	0.8684	0.8243	0.8004	0.7974	0.8588	0.7359		28	0.7484	0.6402	0.7397	0.7594	0.707	0.5413	0.6125	0.7389	0.8683	0.6692	0.8285	0.5812	0.5661	0.8426	0.8241	0.8218	0.5615	0.648	0.6674
0.762686	0.112958	0.690237	0.0990793		29	0.6196	0.6028	0.8614	0.6628	0.6681	0.8984	0.724	0.872	0.8892	0.7297	0.8365	0.7437	0.9178	0.6516		29	0.6693	0.6487	0.7147	0.7115	0.678	0.5074	0.611	0.7338	0.8341	0.7593	0.8223	0.5611	0.5858	0.807	0.7749	0.8212	0.5559	0.6185	0.7
0.742314	0.101379	0.673184	0.0970083		30	0.6139	0.5535	0.8006	0.6592	0.6212	0.8551	0.7269	0.7772	0.8615	0.7441	0.7873	0.7821	0.8962	0.7136		30	0.7156	0.7234	0.6533	0.7006	0.6719	0.4929	0.5612	0.7218	0.7443	0.6472	0.8014	0.5257	0.5636	0.7404	0.8	0.8309	0.5787	0.6051	0.7125
0.7338	0.105346	0.661526	0.0910964		31	0.6025	0.5788	0.7449	0.5976	0.6278	0.8228	0.717	0.7661	0.865	0.8535	0.714	0.7875	0.8999	0.6958		31	0.723	0.6599	0.6563	0.7268	0.693	0.4929	0.5426	0.6688	0.7012	0.606	0.768	0.5515	0.5614	0.7603	0.7917	0.813	0.5812	0.6031	0.6683
0.726421	0.107264	0.639489	0.100927		32	0.6384	0.5881	0.7712	0.5682	0.6505	0.8316	0.718	0.7418	0.9348	0.7822	0.6948	0.7556	0.8683	0.6264		32	0.7201	0.593	0.6614	0.7288	0.67	0.4722	0.5313	0.6453	0.711	0.5714	0.7662	0.5467	0.5189	0.7252	0.796	0.7949	0.5327	0.5455	0.6197
0.708436	0.1061	0.620316	0.100885		33	0.588	0.6057	0.8006	0.5306	0.6719	0.8678	0.7662	0.7026	0.8356	0.6947	0.7187	0.7408	0.8265	0.5684		33	0.6876	0.5521	0.649	0.6727	0.5669	0.4784	0.5456	0.6852	0.748	0.5078	0.7647	0.5288	0.4922	0.7284	0.7521	0.7609	0.5392	0.5392	0.5872
0.675164	0.0982798	0.5941	0.0999823		34	0.5429	0.5832	0.7676	0.5181	0.6653	0.8366	0.7523	0.6827	0.7432	0.6634	0.6763	0.7187	0.7659	0.5361		34	0.6195	0.5142	0.6246	0.6031	0.5062	0.46	0.5194	0.7123	0.75	0.4826	0.7159	0.527	0.484	0.696	0.7077	0.7507	0.5278	0.52	0.5669
0.659986	0.090362	0.584432	0.110635		35	0.5278	0.6043	0.7337	0.4939	0.6501	0.7885	0.7001	0.656	0.7382	0.672	0.6746	0.7086	0.758	0.534		35	0.6194	0.5068	0.5637	0.5934	0.4992	0.4559	0.4893	0.8128	0.7385	0.4647	0.6603	0.5243	0.4854	0.6659	0.7464	0.7315	0.5352	0.4832	0.5283
0.650536	0.0946028	0.576989	0.106213		36	0.5045	0.5595	0.7319	0.4924	0.612	0.7646	0.6829	0.653	0.7836	0.6347	0.6782	0.6806	0.7636	0.566		36	0.6067	0.5077	0.5545	0.6252	0.4989	0.4568	0.5002	0.8333	0.7182	0.4641	0.6574	0.526	0.4776	0.6482	0.6642	0.7194	0.5128	0.4796	0.512
0.635771	0.0984675	0.563605	0.092153		37	0.4951	0.5276	0.7327	0.4759	0.5958	0.7835	0.7026	0.6301	0.7508	0.6261	0.6615	0.6694	0.7152	0.5345		37	0.5683	0.5032	0.5514	0.5952	0.4837	0.4639	0.5042	0.7931	0.6739	0.4842	0.6512	0.5306	0.476	0.6239	0.6285	0.6969	0.4901	0.4849	0.5053
0.615721	0.0926724	0.548316	0.0832622		38	0.4881	0.5304	0.7228	0.4552	0.5806	0.7707	0.6649	0.6344	0.6865	0.6455	0.6444	0.6115	0.6792	0.5059		38	0.5424	0.4894	0.5347	0.5559	0.4802	0.4672	0.5012	0.7654	0.6538	0.4786	0.6233	0.5109	0.4716	0.5972	0.6154	0.6623	0.4836	0.4673	0.5176
0.5974	0.0859335	0.5386	0.0773017		39	0.4705	0.5312	0.6969	0.4569	0.5513	0.6983	0.609	0.6363	0.6574	0.6518	0.6246	0.6056	0.6972	0.4766		39	0.5492	0.4945	0.5146	0.5556	0.4674	0.4685	0.4574	0.7247	0.6256	0.4732	0.6355	0.5266	0.4588	0.577	0.5871	0.6532	0.4769	0.4726	0.515
0.584129	0.0802005	0.532821	0.0741334		40	0.4599	0.5082	0.6602	0.4596	0.5502	0.6346	0.5964	0.6406	0.6627	0.6211	0.6005	0.6263	0.6893	0.4682		40	0.5564	0.4934	0.5064	0.5234	0.4795	0.4673	0.4365	0.7129	0.6129	0.4928	0.6172	0.521	0.4355	0.5611	0.5914	0.6433	0.4908	0.4719	0.5099
0.570843	0.0786539	0.529616	0.0694168		41	0.4721	0.4991	0.6642	0.4607	0.5205	0.6248	0.6155	0.6527	0.693	0.5529	0.5647	0.5886	0.6228	0.4602		41	0.5651	0.4944	0.5024	0.5108	0.4723	0.4636	0.46	0.6844	0.6446	0.4915	0.6026	0.5185	0.4341	0.5495	0.572	0.6291	0.4848	0.4766	0.5064
0.565529	0.0849622	0.520484	0.066075		42	0.4551	0.5138	0.6793	0.4513	0.4985	0.6184	0.6001	0.6486	0.6934	0.5633	0.5811	0.5277	0.6398	0.447		42	0.5504	0.49	0.4798	0.5165	0.4642	0.4629	0.4555	0.6652	0.6377	0.5109	0.6053	0.5099	0.4341	0.5466	0.5622	0.5848	0.4486	0.4723	0.4923
0.547936	0.0822695	0.513432	0.0598714		43	0.4292	0.4965	0.6657	0.4485	0.4764	0.5947	0.5453	0.6414	0.6615	0.5371	0.5544	0.5404	0.6354	0.4446		43	0.5337	0.4885	0.4648	0.5333	0.4621	0.4633	0.4398	0.6673	0.5792	0.4894	0.5742	0.5116	0.4379	0.5209	0.5631	0.5857	0.4531	0.4962	0.4911
0.537093	0.0754964	0.515926	0.057088		44	0.4468	0.4528	0.589	0.4658	0.481	0.5684	0.5467	0.6661	0.6581	0.5138	0.5274	0.5307	0.6226	0.4501		44	0.5234	0.4993	0.4751	0.4969	0.4689	0.4646	0.4523	0.6683	0.5757	0.5139	0.5596	0.5259	0.4515	0.5317	0.5692	0.5966	0.4665	0.4871	0.4761
0.526393	0.0743128	0.501768	0.0562418		45	0.4386	0.419	0.5205	0.4729	0.4892	0.5426	0.5579	0.6478	0.6524	0.5303	0.5217	0.5209	0.6182	0.4375		45	0.5401	0.4959	0.4711	0.4682	0.4541	0.4477	0.4355	0.6146	0.5732	0.5236	0.5471	0.5146	0.4286	0.5167	0.556	0.5883	0.453	0.4571	0.4482
0.5244	0.0679647	0.5018	0.0561206		46	0.453	0.418	0.5206	0.4735	0.5058	0.5429	0.5103	0.6352	0.6481	0.5325	0.543	0.5122	0.6007	0.4458		46	0.576	0.4902	0.4588	0.4735	0.4637	0.462	0.4351	0.578	0.547	0.5374	0.5527	0.529	0.4141	0.5242	0.5673	0.5848	0.4453	0.4506	0.4445
0.510364	0.0601279	0.495611	0.0537067		47	0.4448	0.4343	0.5183	0.4578	0.4612	0.5352	0.503	0.6149	0.6184	0.4923	0.5336	0.5141	0.5699	0.4473		47	0.5593	0.4902	0.4524	0.4573	0.4586	0.4602	0.4498	0.5595	0.5464	0.5304	0.5442	0.5215	0.4012	0.5219	0.5701	0.5667	0.4499	0.4437	0.4333
0.50795	0.0559043	0.495458	0.0517146		48	0.443	0.4525	0.5165	0.4659	0.4404	0.526	0.5083	0.6267	0.5784	0.4788	0.5144	0.5495	0.555	0.4559		48	0.5328	0.4844	0.4617	0.4664	0.4628	0.464	0.4447	0.5353	0.5372	0.5163	0.5402	0.5186	0.4085	0.5444	0.5897	0.5769	0.4484	0.4374	0.444
0.503436	0.0520345	0.483774	0.049698		49	0.4329	0.4573	0.5133	0.4753	0.4404	0.509	0.5138	0.5976	0.5676	0.4796	0.5019	0.5566	0.5593	0.4435		49	0.5146	0.4709	0.4597	0.4636	0.4667	0.4532	0.4081	0.5084	0.5279	0.5027	0.5373	0.507	0.3887	0.5229	0.5659	0.565	0.4339	0.4535	0.4417
0.503807	0.0598516	0.487216	0.0493079		50	0.4409	0.4511	0.5283	0.4788	0.4382	0.497	0.4994	0.6254	0.572	0.4435	0.5048	0.5792	0.5493	0.4454		50	0.5097	0.4888	0.4529	0.4687	0.4634	0.4468	0.416	0.5077	0.5525	0.5029	0.5452	0.5117	0.3957	0.5191	0.5614	0.5667	0.4468	0.4462	0.4549
0.4899	0.0615417	0.488358	0.050574		51	0.4345	0.4245	0.5072	0.4622	0.4182	0.4903	0.4797	0.6115	0.5795	0.4248	0.4841	0.5461	0.549	0.447		51	0.5103	0.4854	0.4399	0.4603	0.4663	0.4549	0.4347	0.4989	0.5455	0.5149	0.565	0.519	0.3938	0.5252	0.5571	0.5685	0.4459	0.4344	0.4588
0.490214	0.0536934	0.485574	0.0522762		52	0.4381	0.4335	0.4924	0.46	0.4335	0.4828	0.5182	0.598	0.5621	0.4361	0.4741	0.5254	0.5542	0.4546		52	0.513	0.491	0.434	0.4526	0.4573	0.4569	0.4394	0.492	0.5257	0.4948	0.565	0.5203	0.392	0.5318	0.5675	0.5725	0.451	0.4277	0.4414
0.486243	0.0570439	0.478342	0.0500341		53	0.4341	0.409	0.4723	0.4619	0.4492	0.4694	0.5257	0.6153	0.5557	0.4398	0.4789	0.4941	0.5531	0.4489		53	0.5087	0.4771	0.4296	0.4515	0.4517	0.4508	0.443	0.5003	0.5056	0.4896	0.5432	0.5045	0.3896	0.5221	0.5664	0.5628	0.4488	0.4148	0.4284
0.487971	0.0583405	0.478726	0.050166		54	0.4367	0.411	0.4886	0.4603	0.4447	0.4585	0.4999	0.6136	0.5734	0.4388	0.4939	0.5093	0.5548	0.4481		54	0.5106	0.481	0.4379	0.4546	0.461	0.4473	0.4212	0.5026	0.5071	0.5033	0.5172	0.5194	0.3843	0.5219	0.5626	0.5667	0.446	0.4221	0.429
0.478779	0.0556146	0.477484	0.0501724		55	0.4255	0.4073	0.4876	0.4495	0.4317	0.459	0.4906	0.6084	0.5545	0.4317	0.4945	0.4919	0.5261	0.4446		55	0.5026	0.4759	0.4379	0.4455	0.4633	0.4407	0.4102	0.5029	0.4993	0.5188	0.5253	0.5168	0.3804	0.5072	0.5586	0.5678	0.4422	0.4385	0.4383
0.477529	0.0524177	0.482089	0.0531613		56	0.438	0.4107	0.4923	0.4467	0.4203	0.466	0.487	0.6041	0.542	0.4289	0.4931	0.4837	0.5183	0.4543		56	0.5176	0.4831	0.4425	0.447	0.4563	0.4508	0.4079	0.5038	0.5347	0.518	0.5297	0.5234	0.3852	0.5252	0.5655	0.5622	0.4406	0.4302	0.436
0.474271	0.0517729	0.477479	0.0532019		57	0.4361	0.4024	0.4796	0.4455	0.4158	0.4564	0.4802	0.6003	0.5335	0.4439	0.4953	0.5003	0.5081	0.4424		57	0.5085	0.4792	0.4406	0.4476	0.4504	0.4414	0.4101	0.4853	0.5197	0.5042	0.5303	0.5152	0.3802	0.5197	0.5584	0.5794	0.4373	0.4164	0.4482
0.474007	0.0483439	0.476926	0.0474182		58	0.4458	0.4015	0.4882	0.4532	0.4198	0.4737	0.4744	0.5846	0.5313	0.4385	0.4777	0.4952	0.518	0.4342		58	0.5035	0.4831	0.4428	0.457	0.4583	0.4426	0.4192	0.5018	0.5019	0.4806	0.5218	0.5063	0.3811	0.5347	0.5528	0.5521	0.4595	0.4116	0.4509
0.477529	0.0521564	0.473579	0.0476293		59	0.4367	0.4071	0.4863	0.4535	0.4206	0.4771	0.4722	0.6091	0.5318	0.4462	0.4706	0.5073	0.5193	0.4476		59	0.5134	0.4827	0.4432	0.4441	0.4493	0.4418	0.4105	0.482	0.4938	0.4798	0.5121	0.5136	0.3873	0.528	0.5546	0.5487	0.4646	0.4065	0.442
0.476043	0.0541634	0.471953	0.0504781		60	0.4351	0.4169	0.4856	0.4443	0.4217	0.4753	0.463	0.6252	0.5207	0.4373	0.4711	0.5101	0.5091	0.4492		60	0.5195	0.4733	0.4372	0.4491	0.4495	0.4428	0.4014	0.4609	0.485	0.4769	0.5249	0.5246	0.3841	0.5255	0.5561	0.5576	0.4398	0.4296	0.4293
0.471171	0.0517154	0.470226	0.0499086		61	0.4477	0.4198	0.4717	0.4485	0.4029	0.4736	0.4688	0.6158	0.5098	0.4312	0.4792	0.4886	0.5011	0.4377		61	0.521	0.4693	0.4412	0.4443	0.4604	0.4411	0.4029	0.4732	0.4803	0.4899	0.5124	0.5	0.3829	0.5302	0.5474	0.5614	0.4444	0.4104	0.4216
0.4698	0.0479607	0.469168	0.0479552		62	0.4418	0.413	0.4774	0.4491	0.4121	0.4728	0.478	0.5977	0.5062	0.4309	0.4751	0.4869	0.5033	0.4329		62	0.5103	0.4717	0.4268	0.4547	0.4613	0.438	0.4061	0.4828	0.4931	0.4842	0.5067	0.5016	0.3821	0.5135	0.5445	0.5576	0.4478	0.4125	0.4189
0.469743	0.0502924	0.473695	0.0514534		63	0.4332	0.4106	0.4726	0.462	0.4102	0.4719	0.4681	0.6045	0.5078	0.4283	0.4713	0.488	0.5109	0.437		63	0.513	0.4729	0.432	0.4451	0.4553	0.4422	0.4167	0.4732	0.5128	0.4883	0.5211	0.5445	0.3839	0.5109	0.5419	0.5663	0.4449	0.4083	0.4269
0.467893	0.0494002	0.471216	0.0486706		64	0.4406	0.3986	0.4677	0.4664	0.4058	0.4538	0.4708	0.5891	0.5137	0.426	0.4723	0.4836	0.5195	0.4426		64	0.509	0.4831	0.4377	0.4495	0.4532	0.4445	0.4057	0.4753	0.499	0.4648	0.5086	0.5049	0.3863	0.5164	0.5541	0.5686	0.4441	0.4218	0.4265
0.465593	0.0480024	0.470237	0.0506296		65	0.4418	0.3986	0.4834	0.4557	0.4073	0.4617	0.4642	0.5852	0.5137	0.4197	0.4646	0.488	0.4975	0.4369		65	0.5083	0.4779	0.4423	0.4503	0.453	0.4381	0.4021	0.4716	0.4883	0.4616	0.5146	0.5104	0.3883	0.5222	0.5474	0.5794	0.4399	0.4115	0.4273
0.468329	0.0496303	0.4692	0.0494963		66	0.4437	0.3979	0.4889	0.4545	0.4118	0.4661	0.4708	0.5989	0.5136	0.4304	0.4712	0.4769	0.4976	0.4343		66	0.5046	0.4811	0.442	0.4531	0.4523	0.4382	0.4021	0.4725	0.4828	0.4622	0.5141	0.5036	0.3856	0.5198	0.5484	0.5738	0.4371	0.4174	0.4241
0.464957	0.0493541	0.465768	0.0495425		67	0.4423	0.4036	0.4812	0.454	0.4094	0.459	0.4655	0.6007	0.5063	0.4257	0.453	0.4718	0.5	0.4369		67	0.5037	0.4752	0.4403	0.4467	0.4527	0.4358	0.3936	0.4759	0.4863	0.4684	0.504	0.4926	0.3773	0.5121	0.5517	0.564	0.4341	0.4178	0.4174
0.468671	0.0514027	0.466474	0.0500977		68	0.4373	0.404	0.473	0.4577	0.4068	0.4701	0.4674	0.6055	0.5016	0.4323	0.4574	0.4888	0.5204	0.4391		68	0.4759	0.4721	0.4349	0.4443	0.4498	0.4365	0.3911	0.467	0.4917	0.4804	0.5153	0.5162	0.3773	0.515	0.5455	0.5643	0.4483	0.4203	0.4171
0.469236	0.0506428	0.464089	0.0485072		69	0.4382	0.4065	0.4693	0.46	0.4047	0.4831	0.4747	0.605	0.5147	0.4263	0.4661	0.4782	0.4989	0.4436		69	0.4577	0.4714	0.4323	0.445	0.4539	0.4371	0.3963	0.4749	0.4868	0.462	0.5026	0.4965	0.3815	0.5174	0.5516	0.5658	0.4508	0.42	0.4141
0.470729	0.0507529	0.465684	0.0480554		70	0.4387	0.4116	0.4798	0.452	0.4089	0.4801	0.4744	0.6038	0.5098	0.4205	0.4646	0.4901	0.5121	0.4438		70	0.4576	0.472	0.4742	0.4551	0.4441	0.4389	0.3998	0.47	0.4879	0.4596	0.5072	0.4981	0.3745	0.5154	0.5457	0.5667	0.4464	0.4162	0.4186
0.470386	0.0488331	0.470947	0.0498754		71	0.4403	0.4147	0.4861	0.4611	0.4134	0.4696	0.4747	0.6022	0.5029	0.4204	0.4588	0.4902	0.5062	0.4448		71	0.4706	0.4874	0.4827	0.4495	0.4504	0.4339	0.3931	0.4751	0.4843	0.4727	0.5235	0.5148	0.3842	0.5255	0.5521	0.5619	0.4465	0.4196	0.4202
0.467714	0.0529502	0.472458	0.0509608		72	0.4306	0.4021	0.4842	0.4633	0.4021	0.4659	0.4652	0.6035	0.5179	0.4169	0.4588	0.4817	0.5106	0.4452		72	0.4802	0.5015	0.4842	0.4509	0.4468	0.4387	0.3936	0.4745	0.4765	0.4664	0.5157	0.5236	0.387	0.5203	0.5668	0.5618	0.4481	0.4123	0.4278
0.470107	0.0508695	0.469274	0.0506668		73	0.4351	0.4103	0.4893	0.4661	0.4079	0.4642	0.4719	0.6067	0.5062	0.4235	0.4629	0.4922	0.5031	0.4421		73	0.5017	0.4881	0.4733	0.4453	0.4544	0.434	0.3988	0.4768	0.4774	0.4524	0.509	0.5116	0.3851	0.5204	0.5552	0.567	0.4404	0.4048	0.4205
0.469279	0.0514733	0.467368	0.0508482		74	0.4439	0.4157	0.4925	0.462	0.4101	0.4701	0.4732	0.6113	0.5107	0.4213	0.4522	0.471	0.5021	0.4338		74	0.4824	0.4758	0.4558	0.4533	0.4632	0.4359	0.3966	0.4788	0.465	0.4535	0.5162	0.5108	0.3772	0.5172	0.5575	0.5694	0.4402	0.4106	0.4206
0.470486	0.0505902	0.466621	0.0500424		75	0.4488	0.4093	0.5005	0.4635	0.4243	0.468	0.468	0.6131	0.502	0.4192	0.4542	0.4719	0.5014	0.4426		75	0.4882	0.4831	0.4489	0.4504	0.4687	0.4345	0.4047	0.4736	0.4763	0.444	0.5076	0.5031	0.3824	0.5085	0.5539	0.5763	0.4355	0.4095	0.4166
0.471286	0.0517542	0.473163	0.0513827		76	0.4466	0.3934	0.5206	0.4541	0.4129	0.4872	0.4724	0.5921	0.5061	0.4194	0.4553	0.48	0.5164	0.4415		76	0.4907	0.4932	0.4647	0.4461	0.4559	0.4393	0.3979	0.4739	0.4882	0.4578	0.5276	0.5243	0.3909	0.5249	0.5609	0.5686	0.4483	0.4169	0.42
0.468471	0.0547878	0.469095	0.0473791		77	0.4382	0.3942	0.5076	0.4519	0.3954	0.4654	0.4783	0.6046	0.5134	0.4159	0.459	0.4842	0.5035	0.447		77	0.4698	0.4812	0.4617	0.4627	0.4555	0.4399	0.4025	0.4712	0.4743	0.4677	0.5076	0.5079	0.385	0.5209	0.5499	0.5703	0.4376	0.4228	0.4243
0.468743	0.0520913	0.468295	0.0499438		78	0.4381	0.402	0.49	0.4646	0.4044	0.4724	0.4676	0.6016	0.5117	0.4216	0.4541	0.481	0.5157	0.4376		78	0.4446	0.4841	0.473	0.4477	0.4533	0.4373	0.3983	0.4695	0.4795	0.4595	0.5167	0.5226	0.3915	0.5133	0.5629	0.5643	0.4478	0.4109	0.4208
0.46935	0.0500085	0.467437	0.0513889		79	0.4389	0.4051	0.4768	0.4646	0.4094	0.4767	0.473	0.599	0.5	0.4206	0.4658	0.4916	0.5136	0.4358		79	0.4468	0.4839	0.4686	0.4448	0.4547	0.4386	0.3949	0.4695	0.4849	0.4644	0.5252	0.5228	0.3807	0.5151	0.5602	0.5566	0.4494	0.4031	0.4171
0.467243	0.050586	0.4628	0.0476983		80	0.4358	0.395	0.4748	0.4723	0.4051	0.4779	0.4653	0.5958	0.5102	0.4223	0.4588	0.481	0.5072	0.4399		80	0.442	0.4755	0.438	0.4472	0.4549	0.4411	0.3948	0.4583	0.4843	0.4774	0.5092	0.5129	0.3857	0.5076	0.5488	0.5505	0.4424	0.4007	0.4219
0.467764	0.0495259	0.463895	0.0461466		81	0.437	0.3938	0.4811	0.4701	0.4063	0.4708	0.4658	0.5901	0.5104	0.4261	0.4602	0.4915	0.5067	0.4388		81	0.427	0.4764	0.4448	0.4364	0.4485	0.4372	0.398	0.4636	0.4857	0.4853	0.5116	0.5065	0.3912	0.5151	0.5417	0.5524	0.4452	0.4248	0.4226
0.466564	0.0504328	0.465163	0.0503173		82	0.4402	0.3955	0.4852	0.457	0.4038	0.4646	0.4503	0.5917	0.5159	0.4282	0.4645	0.4817	0.5132	0.4401		82	0.4002	0.4752	0.458	0.4386	0.4455	0.4367	0.3953	0.4731	0.495	0.4994	0.5162	0.5073	0.3886	0.5153	0.5397	0.5656	0.4348	0.4231	0.4305
0.468657	0.0489828	0.467332	0.0474689		83	0.4452	0.4015	0.4819	0.4581	0.4124	0.4671	0.45	0.5827	0.5255	0.4209	0.465	0.4914	0.5187	0.4408		83	0.416	0.4782	0.4529	0.4424	0.4632	0.4386	0.4055	0.4779	0.475	0.497	0.5251	0.5137	0.3898	0.5108	0.5391	0.5602	0.4422	0.4224	0.4293
0.467064	0.0543102	0.465374	0.0473661		84	0.4352	0.3922	0.4811	0.4693	0.4008	0.4628	0.4502	0.602	0.5173	0.4162	0.4613	0.4881	0.5175	0.4449		84	0.4311	0.4728	0.4379	0.4479	0.4624	0.4345	0.395	0.4679	0.4739	0.5019	0.5081	0.5194	0.3907	0.5083	0.5422	0.5583	0.444	0.4224	0.4234
0.470386	0.0599646	0.465247	0.048765		85	0.433	0.3927	0.4835	0.4768	0.4123	0.4674	0.4574	0.6337	0.5147	0.4156	0.4561	0.4786	0.5229	0.4407		85	0.4124	0.4717	0.4369	0.4463	0.4601	0.4412	0.3977	0.4605	0.4815	0.4999	0.5138	0.5147	0.3922	0.5237	0.5457	0.5531	0.4473	0.4142	0.4268
0.46865	0.0581369	0.467679	0.05005		86	0.437	0.398	0.4741	0.4604	0.4084	0.4655	0.4554	0.6269	0.5168	0.4171	0.4528	0.4915	0.5176	0.4396		86	0.439	0.4825	0.4387	0.4514	0.4525	0.4412	0.3977	0.4698	0.4774	0.482	0.5346	0.512	0.3848	0.5126	0.5537	0.5632	0.4529	0.4104	0.4295
0.475736	0.0707574	0.471542	0.0536638		87	0.432	0.4008	0.4858	0.4586	0.4163	0.472	0.4555	0.6894	0.5157	0.4252	0.4587	0.4913	0.5172	0.4418		87	0.4509	0.4768	0.4618	0.4443	0.4476	0.4437	0.3989	0.4635	0.4825	0.4903	0.5217	0.537	0.3867	0.5079	0.5958	0.5573	0.4434	0.4187	0.4305
0.484657	0.104225	0.469174	0.056405		88	0.4342	0.4066	0.4863	0.4481	0.416	0.4568	0.4609	0.8266	0.5176	0.4167	0.4674	0.4942	0.5089	0.4449		88	0.4265	0.4726	0.4718	0.4449	0.4488	0.441	0.3996	0.4604	0.48	0.496	0.5055	0.5276	0.3834	0.5152	0.6144	0.5496	0.4416	0.4128	0.4226
0.499643	0.150457	0.469263	0.0593867		89	0.4363	0.3987	0.4806	0.4585	0.4104	0.4629	0.4966	1.0085	0.5159	0.4259	0.457	0.4849	0.504	0.4548		89	0.414	0.4805	0.4667	0.4452	0.4469	0.4366	0.3946	0.4661	0.4746	0.4987	0.511	0.5079	0.3831	0.5216	0.6233	0.5636	0.4411	0.4154	0.4251
0.518957	0.196683	0.4724	0.0666214		90	0.4492	0.4041	0.462	0.4637	0.4061	0.4669	0.5942	1.1811	0.5192	0.4242	0.4587	0.4931	0.496	0.4469		90	0.4389	0.4766	0.4365	0.4429	0.4514	0.4385	0.3936	0.4732	0.4745	0.5011	0.5233	0.5058	0.3779	0.5226	0.6402	0.6044	0.4386	0.41	0.4256
0.534186	0.215557	0.475547	0.0733526		91	0.4494	0.3978	0.4655	0.4612	0.4074	0.4802	0.7326	1.2289	0.5139	0.4196	0.4635	0.5038	0.503	0.4518		91	0.4594	0.4762	0.4287	0.4348	0.4504	0.4344	0.3986	0.4766	0.471	0.4924	0.5185	0.5094	0.384	0.5198	0.6498	0.6554	0.4395	0.4065	0.43
0.536029	0.208305	0.479626	0.0868445		92	0.4381	0.3998	0.4777	0.4606	0.4024	0.4701	0.7955	1.1787	0.5173	0.4247	0.4633	0.483	0.5095	0.4837		92	0.4464	0.4773	0.4461	0.4429	0.4461	0.433	0.3907	0.4679	0.4796	0.4982	0.5009	0.5055	0.3837	0.5202	0.6501	0.7451	0.4407	0.41	0.4285
0.545257	0.217172	0.486379	0.101404		93	0.4393	0.4071	0.4758	0.4675	0.4003	0.4744	0.8353	1.2043	0.5218	0.4203	0.461	0.4974	0.5164	0.5127		93	0.4721	0.4723	0.4443	0.4401	0.4496	0.4332	0.3918	0.4713	0.4775	0.486	0.5096	0.5055	0.3789	0.554	0.6803	0.8035	0.4374	0.4102	0.4236
0.553614	0.234459	0.4958	0.106899		94	0.4366	0.3948	0.4669	0.4692	0.4105	0.4664	0.9039	1.2426	0.5262	0.4138	0.4655	0.488	0.5675	0.4987		94	0.5018	0.4838	0.4718	0.4436	0.456	0.4315	0.4014	0.4726	0.4928	0.471	0.5058	0.495	0.3777	0.6317	0.7448	0.7701	0.4372	0.4012	0.4304
0.560871	0.24334	0.503121	0.120358		95	0.4383	0.3906	0.4932	0.4554	0.4126	0.4663	0.8919	1.2885	0.5249	0.4245	0.4646	0.4876	0.6096	0.5042		95	0.5388	0.4822	0.5053	0.4451	0.4533	0.4262	0.3992	0.4756	0.4731	0.4621	0.5013	0.4979	0.3846	0.6605	0.8333	0.7565	0.4429	0.3974	0.424
0.563814	0.229782	0.513463	0.134338		96	0.4316	0.405	0.5613	0.4502	0.4098	0.4859	0.8733	1.2402	0.5168	0.4243	0.4589	0.485	0.6409	0.5102		96	0.5426	0.4998	0.5591	0.4394	0.4427	0.4246	0.3931	0.4747	0.4794	0.4506	0.5278	0.5074	0.3814	0.6843	0.893	0.7746	0.4454	0.4069	0.429
0.576	0.226227	0.530489	0.146123		97	0.4321	0.4081	0.619	0.4626	0.4101	0.4888	0.9096	1.2053	0.5132	0.4217	0.4615	0.5296	0.6878	0.5146		97	0.5302	0.5508	0.6062	0.447	0.4448	0.4299	0.3936	0.4674	0.4757	0.465	0.618	0.5179	0.3891	0.7541	0.8937	0.8149	0.4484	0.4038	0.4288
0.596257	0.255265	0.552589	0.165244		98	0.4272	0.408	0.6122	0.4699	0.412	0.5024	0.9413	1.3158	0.5169	0.4173	0.4462	0.632	0.7321	0.5143		98	0.5896	0.6206	0.6642	0.4434	0.4425	0.4311	0.3904	0.47	0.4758	0.4774	0.7357	0.5355	0.4028	0.8177	0.9091	0.8371	0.4422	0.3923	0.4218
0.620029	0.280011	0.569142	0.17441		99	0.4431	0.4333	0.6286	0.4659	0.4084	0.4702	0.9551	1.3909	0.526	0.409	0.4579	0.7159	0.8575	0.5186		99	0.5883	0.6542	0.6908	0.4772	0.4625	0.4383	0.3925	0.4815	0.4768	0.4962	0.7741	0.5454	0.4165	0.8451	0.97	0.8315	0.4416	0.3998	0.4314
0.633136	0.285245	0.576116	0.187267		100	0.4378	0.4533	0.6399	0.4561	0.4124	0.4535	0.9472	1.3547	0.524	0.4188	0.4587	0.7607	1.0097	0.5371		100	0.6063	0.6588	0.6734	0.4937	0.4563	0.4399	0.3932	0.4816	0.472	0.4846	0.8385	0.555	0.4266	0.8152	1.0405	0.8491	0.4361	0.3937	0.4317
0.636571	0.290283	0.598089	0.209151		101	0.4328	0.4719	0.6378	0.4601	0.4081	0.4539	0.9033	1.3705	0.506	0.418	0.457	0.8263	1.0324	0.5339		101	0.684	0.7293	0.7088	0.5011	0.4577	0.4373	0.3941	0.4795	0.4766	0.4712	0.893	0.5673	0.47	0.815	1.1236	0.8922	0.4405	0.3981	0.4244
0.649536	0.287891	0.616863	0.215518		102	0.4349	0.4968	0.724	0.4575	0.4032	0.4475	0.9102	1.3192	0.5077	0.4198	0.4827	0.9655	1.009	0.5155		102	0.7756	0.764	0.7136	0.5663	0.4526	0.4395	0.3901	0.4738	0.4806	0.4592	0.9318	0.5947	0.529	0.8391	1.1019	0.9326	0.4574	0.3989	0.4197
0.669179	0.291531	0.628784	0.215178		103	0.4397	0.5199	0.768	0.4628	0.4035	0.4524	0.9247	1.2741	0.5037	0.454	0.5286	1.0069	1.114	0.5162		103	0.8789	0.7579	0.6881	0.6079	0.4462	0.444	0.3977	0.4756	0.477	0.457	0.92	0.6262	0.5484	0.8363	1.0378	1.0101	0.5091	0.4106	0.4181
0.675036	0.277694	0.633774	0.216107		104	0.4456	0.5829	0.6996	0.4668	0.4217	0.4545	0.9566	1.2534	0.5188	0.4656	0.6032	1.0196	1.0605	0.5017		104	0.8573	0.7824	0.7175	0.6269	0.448	0.4561	0.3905	0.4788	0.4807	0.4414	0.9202	0.6691	0.5427	0.776	1.0618	1.026	0.5263	0.4186	0.4214
0.704693	0.281816	0.645911	0.230643		105	0.4601	0.6244	0.7647	0.4635	0.4702	0.4585	0.9185	1.3001	0.5488	0.5082	0.6651	1.1902	0.9527	0.5407		105	0.973	0.8014	0.7113	0.63	0.4529	0.446	0.386	0.4639	0.4729	0.4518	0.9831	0.7622	0.5752	0.7131	1.0961	0.9882	0.5381	0.4048	0.4223
0.731429	0.272576	0.664811	0.243451		106	0.4606	0.6608	0.8626	0.5014	0.5534	0.4656	0.944	1.2559	0.5774	0.5101	0.7027	1.2229	0.9587	0.5639		106	0.9876	0.8212	0.7074	0.6678	0.4603	0.4521	0.3913	0.4668	0.4702	0.4518	1.0608	0.8614	0.6008	0.717	1.1414	0.966	0.5758	0.4135	0.4182
0.7469	0.250883	0.668268	0.236551		107	0.4638	0.7232	0.8928	0.5258	0.6682	0.5143	0.9288	1.2919	0.6002	0.5094	0.7168	1.1103	0.9371	0.574		107	0.9062	0.8223	0.68	0.7384	0.4738	0.4547	0.3926	0.4625	0.4709	0.4517	1.0553	0.8818	0.5861	0.6991	1.148	0.9746	0.6197	0.4516	0.4278
0.760829	0.24854	0.662547	0.228658		108	0.4631	0.7528	0.832	0.5284	0.7521	0.5381	0.899	1.3589	0.6344	0.5399	0.74	1.0637	0.9636	0.5856		108	0.8402	0.8087	0.6415	0.7672	0.4833	0.448	0.3816	0.4607	0.4721	0.4502	1.0188	0.8483	0.6053	0.6772	1.1074	1.0468	0.6099	0.4981	0.4231
0.781964	0.225383	0.667716	0.225468		109	0.4684	0.7487	0.8272	0.5728	0.8031	0.5732	0.9253	1.3007	0.7546	0.6027	0.7553	0.9903	1.0391	0.5861		109	0.7762	0.857	0.687	0.7356	0.5266	0.4918	0.387	0.4666	0.4709	0.4463	0.9529	0.8586	0.6641	0.6432	1.1384	1.0792	0.5755	0.5125	0.4172
0.790314	0.211032	0.669484	0.216774		110	0.4692	0.7722	0.7878	0.5671	0.7962	0.6155	0.9428	1.2504	0.8523	0.6148	0.8017	0.903	1.0765	0.6149		110	0.7744	0.8782	0.6863	0.718	0.5861	0.5111	0.4004	0.4651	0.4602	0.4619	0.9508	0.8486	0.6677	0.609	1.1251	1.0441	0.6045	0.5109	0.4178
0.808093	0.202365	0.687774	0.208075		111	0.475	0.7656	0.7809	0.6036	0.7852	0.643	0.9857	1.2557	0.8705	0.6108	0.8253	0.8947	1.0612	0.7561		111	0.797	0.8614	0.6526	0.7215	0.6548	0.5572	0.4667	0.4733	0.4805	0.4771	0.9776	0.8917	0.6488	0.5977	1.138	1.0238	0.628	0.6019	0.4181
0.846264	0.186715	0.721663	0.209679		112	0.5207	0.7774	0.8573	0.6848	0.8502	0.6788	1.0057	1.2469	0.8842	0.6322	0.8459	0.8924	1.0695	0.9017		112	0.7347	0.8739	0.6514	0.7607	0.7283	0.6426	0.5507	0.4898	0.5146	0.4623	1.046	0.8773	0.6793	0.6236	1.1796	1.0506	0.644	0.7859	0.4163
0.856157	0.196431	0.740884	0.205941		113	0.5234	0.7704	0.901	0.6778	0.8958	0.6882	1.0012	1.2546	0.9228	0.6497	0.8829	0.8391	1.1576	0.8217		113	0.7622	0.835	0.6469	0.8333	0.7362	0.7223	0.6027	0.5194	0.5427	0.4629	1.0192	0.8959	0.7298	0.6081	1.1962	1.0714	0.6584	0.8151	0.4191
0.880379	0.200712	0.758895	0.201375		114	0.5158	0.7757	0.9359	0.6738	0.9016	0.7269	1.0073	1.2905	0.9382	0.7003	0.8924	0.9769	1.1597	0.8303		114	0.9169	0.8787	0.6987	0.843	0.7325	0.763	0.6252	0.5399	0.5441	0.4797	1.0045	0.8784	0.7623	0.6259	1.16	1.1009	0.6582	0.7778	0.4293
0.862471	0.178385	0.763979	0.203869		115	0.4962	0.7813	0.9197	0.6709	0.8678	0.7613	0.9404	1.2318	0.9588	0.7418	0.8669	0.978	1.0601	0.7996		115	0.897	0.9703	0.7587	0.8424	0.7111	0.7776	0.6327	0.5471	0.5571	0.4694	1.0067	0.9135	0.7275	0.6461	1.1431	1.102	0.6708	0.7252	0.4173
0.845636	0.160392	0.768779	0.200769		116	0.5225	0.7594	0.9107	0.6725	0.8497	0.7812	0.8566	1.1875	0.9617	0.7719	0.8213	0.9031	1.0493	0.7915		116	0.8443	0.919	0.719	0.8434	0.7304	0.8156	0.6774	0.5404	0.5819	0.4631	0.9976	1.0121	0.7311	0.6368	1.1359	1.0902	0.6892	0.7596	0.4198
0.856214	0.16189	0.773305	0.204539		117	0.5222	0.7875	0.8643	0.6807	0.8712	0.7836	0.853	1.194	0.9391	0.7615	0.8587	0.9831	1.0593	0.8288		117	0.9576	0.822	0.6771	0.8226	0.8005	0.8074	0.722	0.5432	0.569	0.4573	1.0244	0.9571	0.7612	0.6217	1.1647	1.0905	0.6722	0.7974	0.4249
0.873721	0.171355	0.781953	0.208049		118	0.5406	0.7801	0.8092	0.6793	0.8766	0.8287	0.8329	1.2311	0.9538	0.7864	0.8969	1.0057	1.1101	0.9007		118	0.9905	0.867	0.7555	0.8367	0.7518	0.782	0.7118	0.5815	0.5723	0.4673	1.0434	0.9158	0.7646	0.6257	1.212	1.0982	0.6613	0.7915	0.4282
0.875143	0.169983	0.796884	0.207041		119	0.5551	0.7422	0.9025	0.674	0.8804	0.848	0.8144	1.1974	0.9722	0.7715	0.8468	1.0464	1.1107	0.8904		119	1.0291	0.8676	0.7494	0.8069	0.8013	0.7804	0.705	0.6296	0.6119	0.4851	1.0758	0.9756	0.7433	0.6453	1.1901	1.1177	0.7028	0.8014	0.4225
0.885593	0.176953	0.815042	0.198623		120	0.5749	0.7207	1.0212	0.6536	0.876	0.8642	0.8631	1.166	1.046	0.8023	0.8291	1.068	1.1182	0.795		120	0.9439	0.8708	0.7352	0.7983	0.8262	0.7574	0.7708	0.7099	0.7266	0.5112	1.0552	1.0741	0.7348	0.6309	1.2321	1.1052	0.7485	0.8131	0.4416
0.888564	0.145723	0.836184	0.194575		121	0.5977	0.7149	0.9409	0.7959	0.8352	0.8874	0.8911	1.1334	1.0809	0.8247	0.8794	0.9779	1.0681	0.8124		121	0.9334	0.8609	0.7424	0.8818	0.8758	0.7305	0.8108	0.7899	0.8268	0.5406	1.0818	1.0445	0.7792	0.611	1.2746	1.0955	0.7209	0.8062	0.4809
0.8954	0.139859	0.837563	0.171551		122	0.6184	0.7415	0.9062	0.8464	0.8443	0.8704	0.8691	1.1223	1.0369	0.8764	0.9258	1.0092	1.1056	0.7631		122	0.9531	0.8228	0.7149	0.9357	0.8741	0.7428	0.7709	0.7989	0.8932	0.6166	1.1067	0.996	0.8083	0.6228	1.1493	1.0761	0.6944	0.822	0.5151
0.914793	0.176726	0.826453	0.147999		123	0.6275	0.775	0.924	0.8356	0.8513	0.8636	0.8547	1.2681	1.0607	0.8679	0.9506	1.1057	1.1362	0.6862		123	1.0001	0.8366	0.6955	0.9323	0.8348	0.8155	0.7474	0.7803	0.9086	0.6443	1.0149	0.9241	0.7757	0.6384	1.0948	1.0294	0.6882	0.7791	0.5626
0.937821	0.189925	0.864411	0.15505		124	0.6409	0.7774	0.9753	0.8385	0.8315	0.9182	0.8735	1.3572	1.1205	0.8874	1.0562	1.0397	1.1185	0.6947		124	0.9712	0.8866	0.751	0.9429	0.824	0.8943	0.7528	0.8457	0.9743	0.6636	1.0814	0.9984	0.8115	0.6498	1.1484	1.0965	0.7374	0.7791	0.6149
0.936543	0.178271	0.884953	0.153307		125	0.6037	0.7552	1.0381	0.8334	0.8928	0.9387	0.9082	1.3016	1.0844	0.8459	1.1201	0.9505	1.0744	0.7646		125	0.9426	0.9174	0.7662	0.9714	0.8383	0.8897	0.7606	0.8848	0.9903	0.7372	1.174	1.0475	0.7792	0.6414	1.0908	1.1183	0.7867	0.8307	0.647
0.928129	0.187345	0.885189	0.146334		126	0.5723	0.754	1.0703	0.8679	0.9226	0.9447	0.9104	1.3271	1.0879	0.8004	1.0427	0.9569	1.0307	0.7059		126	0.9789	0.8936	0.7445	0.9253	0.7685	0.8942	0.7927	0.8792	0.9715	0.8755	1.1301	1.0545	0.732	0.6444	1.1027	1.1159	0.7995	0.8442	0.6714
0.929964	0.191296	0.890811	0.15452		127	0.6018	0.7695	0.9984	0.903	0.9279	0.9544	0.8749	1.3448	1.1183	0.8254	0.9384	1.0187	1.0957	0.6483		127	0.9791	0.9386	0.765	0.8677	0.7822	0.9361	0.7672	0.8334	1.0005	0.9296	1.1472	1.1664	0.7179	0.6496	1.0677	1.0813	0.8147	0.8081	0.6731
0.918914	0.188103	0.902216	0.149049		128	0.5673	0.7753	0.9197	0.8999	0.8522	0.9936	0.862	1.2967	1.1192	0.8683	0.9008	1.0245	1.1205	0.6648		128	0.9729	1.0783	0.8905	0.8759	0.7526	0.9701	0.7635	0.8003	1.0039	0.9527	1.1415	1.0798	0.6998	0.6558	1.0472	1.0666	0.8535	0.8606	0.6766
0.906857	0.194611	0.897589	0.131461		129	0.5406	0.7652	0.9232	0.815	0.7873	0.9831	0.874	1.247	1.1661	0.8625	0.847	0.9953	1.1784	0.7113		129	0.9228	1.0564	0.8285	0.8724	0.7139	0.9475	0.7853	0.8699	1.0112	0.8571	1.0597	0.9915	0.7111	0.6807	1.0836	1.0538	0.8919	0.9938	0.7231
0.915629	0.187604	0.891342	0.122421		130	0.5963	0.759	0.971	0.7871	0.8089	0.9287	0.8839	1.231	1.1618	0.8969	0.8946	0.9368	1.2353	0.7275		130	0.9549	1.0298	0.7787	0.8091	0.7374	0.9594	0.7875	0.9243	1.0433	0.8127	0.9859	0.9646	0.7343	0.6921	1.0854	1.0496	0.8581	0.9469	0.7815
0.925486	0.192423	0.879184	0.1296		131	0.6302	0.7507	1.0147	0.9006	0.8268	0.8653	0.8516	1.2742	1.1722	0.9016	0.9919	0.8532	1.2273	0.6965		131	0.8395	0.9711	0.7858	0.8492	0.7529	0.9667	0.7968	0.8898	1.0297	0.8326	1.0405	0.9757	0.7265	0.6884	1.1132	1.0826	0.7166	0.8654	0.7815
0.908193	0.200151	0.890168	0.136075		132	0.5955	0.7167	0.931	0.9302	0.8632	0.8981	0.7989	1.2604	1.2125	0.8384	0.935	0.8696	1.2031	0.6621		132	0.8817	0.977	0.8331	0.9168	0.7539	0.895	0.8188	0.8005	1.0548	0.8339	1.1258	0.9507	0.7221	0.7304	1.1593	1.0868	0.735	0.8453	0.7923
0.930271	0.200575	0.917258	0.142338		133	0.6099	0.695	0.991	0.8293	0.9026	0.983	0.8732	1.2332	1.2074	0.8453	0.8893	1.0533	1.2299	0.6814		133	1.0291	0.9837	0.7927	0.9414	0.7549	0.948	0.8447	0.894	1.0759	0.8205	1.1967	0.9388	0.7559	0.7248	1.185	1.0707	0.8086	0.848	0.8145
0.944979	0.195404	0.921679	0.147793		134	0.6142	0.7022	1.0542	0.8431	0.8485	1.0222	0.9392	1.2288	1.167	0.8897	0.9059	1.1359	1.1838	0.695		134	1.1177	0.9915	0.7544	0.8903	0.7751	0.9537	0.7888	0.9509	1.0403	0.8376	1.1616	0.982	0.7767	0.7053	1.2089	1.0722	0.8265	0.8699	0.8085
0.9252	0.18	0.916058	0.138078		135	0.6278	0.7379	1.0223	0.9047	0.8195	0.9486	0.9051	1.2508	1.1327	0.8246	0.9414	1.1026	1.065	0.6698		135	1.1159	1.0134	0.7674	0.8718	0.8004	0.9585	0.7662	0.882	1.0197	0.907	1.0658	1.0379	0.7568	0.7246	1.1525	1.0926	0.7617	0.8912	0.8197
0.905914	0.183906	0.917332	0.1473		136	0.6626	0.7604	0.9846	0.8815	0.8638	0.8706	0.8754	1.2547	1.1489	0.7418	0.9255	1.0817	1.0317	0.5996		136	1.1128	1.0034	0.7466	0.8931	0.8185	0.9631	0.7671	0.8628	1.0613	0.9126	1.0267	1.0773	0.7471	0.7446	1.1905	1.1065	0.7319	0.8564	0.807
0.915579	0.192083	0.902489	0.144198		137	0.6464	0.7628	0.962	0.8825	0.9079	0.8453	0.8995	1.338	1.0903	0.8073	0.8883	1.0521	1.1235	0.6122		137	1.073	0.9001	0.6728	0.8712	0.8252	0.963	0.741	0.9152	1.0913	0.8695	1.015	1.0542	0.7497	0.7199	1.142	1.0897	0.7261	0.8679	0.8605
0.916786	0.177454	0.911784	0.134347		138	0.6323	0.7194	0.9311	0.9165	0.9225	0.9066	0.8743	1.1978	1.0958	0.8299	0.9232	1.0859	1.164	0.6357		138	1.1195	0.9209	0.7409	0.9019	0.8088	0.9976	0.7252	0.9441	1.0444	0.958	1.0451	0.9921	0.7366	0.7425	1.1002	1.0752	0.7463	0.8816	0.843
0.935436	0.184633	0.941963	0.136404		139	0.6223	0.7351	1.0206	0.9148	0.9676	0.9626	0.84	1.0941	1.1403	0.8429	1.0062	1.0318	1.2714	0.6464		139	1.1188	1.0835	0.8196	0.9364	0.8309	1.0858	0.8039	0.9759	0.9861	1.0068	1.0578	0.9903	0.7468	0.7364	1.1324	1.1117	0.7639	0.8802	0.8301
0.941393	0.17512	0.932374	0.135471		140	0.6404	0.7854	1.0559	0.9123	0.9193	1.0258	0.8377	1.0971	1.093	0.8157	0.9983	1.078	1.2482	0.6724		140	1.1334	1.0561	0.7972	0.8883	0.819	1.0332	0.8677	0.9463	0.9574	0.9019	1.0949	0.9988	0.7825	0.7336	1.1769	1.0805	0.7462	0.8886	0.8126
0.949971	0.162192	0.918005	0.135011		141	0.6918	0.8581	1.0313	0.8732	0.8573	1.1088	0.8414	1.2353	1.0563	0.836	0.9542	1.0779	1.1469	0.7311		141	1.0752	1.0324	0.8098	0.8501	0.824	0.9981	0.8627	0.8804	0.9862	0.8639	1.0471	1.0614	0.7616	0.7382	1.1727	1.0911	0.7106	0.8708	0.8058
0.914629	0.148483	0.890742	0.148149		142	0.7084	0.8494	0.9737	0.8667	0.8297	1.0452	0.8415	1.2432	1.0161	0.8515	0.8875	0.9191	1.0862	0.6866		142	0.958	1.0353	0.769	0.8588	0.7911	0.9195	0.8459	0.7847	1.02	0.9234	1.0446	1.0017	0.701	0.7324	1.2112	1.0809	0.6524	0.8268	0.7674
