# Supplementary material for: Hypoxia controls plasma membrane targeting of polarity proteins by dynamic turnover of PI4P and PI(4,5)P2
Source: eLife. 2022 Jun 9;11:e79582. doi: 10.7554/eLife.79582 (PMC9242647; doi:10.7554/eLife.79582)
Supplement: Figure 3—source data 7. [file elife-79582-fig3-data7.xlsx]

## Sheet: Figure 3-fig sup 1 Lgl
Figure 3 Souce Data 7
						1	2	3	4	5	6	7	8	9	10	11	12	13	14	15	16			1	2	3	4	5	6	7	8	9	10	11	12	13	14	15	16	17
WT		RNAi			WT																		RNAi
AVG	STDEV	AVG	STDEV
t_C2_PM/Cy	t_C2_PM/Cy	t_C2_PM/Cy	t_C2_PM/Cy		min	t_C2_PM/Cy	t_C2_PM/Cy	t_C2_PM/Cy	t_C2_PM/Cy	t_C2_PM/Cy	t_C2_PM/Cy	t_C2_PM/Cy	t_C2_PM/Cy	t_C2_PM/Cy	t_C2_PM/Cy	t_C2_PM/Cy	t_C2_PM/Cy	t_C2_PM/Cy	t_C2_PM/Cy	t_C2_PM/Cy	t_C2_PM/Cy		min	t_C2_PM/Cy	t_C2_PM/Cy	t_C2_PM/Cy	t_C2_PM/Cy	t_C2_PM/Cy	t_C2_PM/Cy	t_C2_PM/Cy	t_C2_PM/Cy	t_C2_PM/Cy	t_C2_PM/Cy	t_C2_PM/Cy	t_C2_PM/Cy	t_C2_PM/Cy	t_C2_PM/Cy	t_C2_PM/Cy	t_C2_PM/Cy	t_C2_PM/Cy
0.998231	0.0647851	1.00851	0.0734016		1	1.0183	0.8062	0.9468	1.0834	1.0341	0.9994	0.9951	0.9552	1.064	0.9828	1.0567	0.9549	1.0004	1.045	1.0189	1.0105		1	1.0582	1.1277	0.9535	1.0183	1.0011	0.9869	1.0409	1.0044	0.9979	1.0276	1.0421	0.95	1.0676	0.8244	0.8958	1.0975	1.0507
0.982844	0.0445242	1.00654	0.0574172		2	1.0081	0.9266	0.8975	0.9687	0.9642	0.9207	1.0087	0.9919	0.9971	0.9596	0.9876	1.0553	0.9602	1.0554	1.0106	1.0133		2	0.9937	1.0782	0.9289	1.0241	1.069	1.1138	0.9808	1.0155	0.9375	1.0288	0.9568	0.9706	0.9153	1.0551	1.0264	1.0576	0.9591
1.01659	0.0455021	1.00431	0.0663886		3	0.9388	1.0614	0.9964	0.9685	1.0352	1.0794	1.107	1.0353	0.965	1.013	1.021	1.0029	0.9613	1.0125	1.0552	1.0126		3	1.0082	0.9352	0.8645	0.9889	1.0533	0.9683	1.0159	0.9091	1.0793	1.022	0.9849	1.0331	0.963	1.1054	1.1133	0.9836	1.0452
1.01483	0.0883646	0.988524	0.0434674		4	0.9525	1.2035	1.0958	1.0092	1.0032	1.0785	0.9234	0.9508	1.1013	1.0649	0.8714	1.0316	1.1038	0.9893	0.9171	0.941		4	0.9421	0.9542	1.0286	1.0548	0.97	0.9338	0.9759	1.0536	1.0181	0.9572	0.9738	0.9835	1.0634	0.9903	1.0066	0.9172	0.9818
0.987506	0.0613867	0.992147	0.0749878		5	1.0823	1.0023	1.0634	0.9703	0.9634	0.922	0.9657	1.0668	0.8726	0.9797	1.0634	0.9553	0.9743	0.8978	0.9982	1.0226		5	0.9978	0.9048	1.2244	0.914	0.9067	0.9972	0.9866	1.0175	0.9672	0.9645	1.0423	1.0627	0.9907	1.0248	0.958	0.9441	0.9632
0.960406	0.0633802	0.989494	0.102397		6	1.0161	0.9318	0.9673	0.9521	1.0403	0.9905	0.9712	0.9183	0.8574	0.9943	1.0541	0.9188	0.8856	0.8609	1.0563	0.9515		6	0.9362	0.9111	1.1938	0.8651	0.9952	1.0762	0.982	1.0595	0.9531	1.0359	0.8194	0.9374	0.9375	1.106	1.161	0.9354	0.9166
0.934569	0.0697645	0.954659	0.103573		7	0.869	0.9809	0.9057	1.0191	0.9867	0.9544	0.914	0.9575	0.8644	1.0638	1.0123	0.8713	0.8342	0.8236	0.9551	0.9411		7	1.0313	0.9496	1.1085	0.8696	1.0149	1.0781	0.9376	0.9925	0.8783	1.0438	0.7659	0.9563	0.85	0.9866	1.1022	0.8096	0.8544
0.949619	0.0725375	0.9516	0.117907		8	0.8686	1.0022	0.9422	1.009	1.0226	0.9263	0.8858	0.9637	0.9335	1.0735	0.8636	0.9599	1.0159	0.8453	0.8478	1.034		8	0.9162	0.8227	0.9341	0.9873	0.9726	1.0241	0.9031	0.9456	0.8931	0.8981	0.763	0.9262	0.8841	0.967	1.3233	1.0471	0.9696
0.925044	0.0716179	0.939176	0.0684317		9	0.9177	0.9684	0.943	0.924	0.9894	0.8286	0.8537	0.8916	0.8446	1.0883	0.9828	0.8252	0.9359	0.8749	0.9305	1.0021		9	0.9543	0.8197	0.9698	0.9204	0.9773	1.0273	0.9193	0.9583	0.9964	0.9067	0.7865	0.9493	0.8581	0.9439	1.032	0.9294	1.0173
0.872431	0.0557428	0.931059	0.0754636		10	0.8169	0.8211	0.8336	0.8747	0.9751	0.8452	0.964	0.8587	0.7837	0.8653	0.8922	0.868	0.9461	0.8113	0.9144	0.8886		10	0.9336	1.0154	0.9572	0.9136	0.9839	0.9423	0.8561	1.011	0.8401	0.8696	0.8148	0.9817	0.7707	0.9426	1.0023	0.9816	1.0115
0.835294	0.0685743	0.863382	0.0580889		11	0.7777	0.799	0.7819	0.8897	0.9942	0.7585	0.8659	0.834	0.7574	0.8744	0.84	0.7971	0.8635	0.7739	0.806	0.9515		11	0.8754	0.8234	0.9189	0.8256	0.9152	0.882	0.8108	0.8805	0.8492	0.8855	0.739	0.937	0.782	0.8408	0.9161	0.8358	0.9603
0.785394	0.073824	0.800965	0.0690317		12	0.7188	0.7861	0.7069	0.8589	0.9168	0.7134	0.7818	0.7202	0.7147	0.9281	0.7519	0.768	0.8256	0.708	0.832	0.8351		12	0.876	0.7593	0.7439	0.7545	0.828	0.8802	0.7716	0.865	0.7886	0.8817	0.6556	0.7769	0.7337	0.864	0.9027	0.7357	0.799
0.726863	0.064843	0.730694	0.0694167		13	0.6845	0.693	0.7272	0.7593	0.8393	0.6378	0.6832	0.6676	0.6333	0.7664	0.8172	0.7288	0.8161	0.6706	0.7201	0.7854		13	0.784	0.7081	0.7075	0.7171	0.7096	0.8049	0.6783	0.7678	0.7562	0.7332	0.6009	0.7207	0.6044	0.7989	0.8357	0.6661	0.8284
0.70245	0.0717246	0.698612	0.0723019		14	0.6604	0.6363	0.6518	0.7457	0.8272	0.6309	0.7119	0.7328	0.5839	0.7498	0.8143	0.6721	0.7852	0.6257	0.6709	0.7403		14	0.6609	0.6656	0.6287	0.6596	0.6803	0.7603	0.6454	0.6824	0.6843	0.7399	0.6398	0.6641	0.6167	0.8197	0.8752	0.6685	0.785
0.6849	0.0615953	0.680559	0.0647865		15	0.6161	0.6593	0.6722	0.699	0.7575	0.6257	0.6437	0.6692	0.5756	0.7331	0.81	0.7154	0.7278	0.6128	0.7235	0.7175		15	0.6828	0.6216	0.615	0.6478	0.666	0.7086	0.6272	0.6557	0.7211	0.6958	0.5722	0.6988	0.6003	0.7674	0.7879	0.7029	0.7984
0.6715	0.0558011	0.663718	0.0728961		16	0.666	0.6902	0.6201	0.7301	0.7459	0.5593	0.6435	0.7002	0.5946	0.6835	0.7376	0.7299	0.6738	0.6211	0.6287	0.7195		16	0.6574	0.5881	0.5881	0.6481	0.6472	0.7307	0.6013	0.6276	0.7395	0.6894	0.5171	0.6496	0.6303	0.7338	0.7941	0.6667	0.7742
0.670713	0.0716999	0.656471	0.063847		17	0.6744	0.6369	0.5739	0.6512	0.8604	0.6049	0.7049	0.6292	0.5836	0.7358	0.7031	0.6708	0.7424	0.6351	0.6201	0.7047		17	0.6389	0.6041	0.5801	0.6919	0.6692	0.7306	0.6233	0.6344	0.6681	0.6554	0.5279	0.6181	0.6091	0.7422	0.7792	0.6601	0.7274
0.655844	0.0682124	0.646406	0.0714721		18	0.6245	0.6502	0.5774	0.7058	0.7922	0.5844	0.6587	0.6035	0.584	0.6814	0.7634	0.6238	0.6945	0.5941	0.6107	0.7449		18	0.675	0.5905	0.5772	0.6351	0.6422	0.6836	0.5738	0.6267	0.6205	0.6729	0.5402	0.5715	0.6072	0.7153	0.7933	0.6817	0.7822
0.656362	0.0714206	0.639153	0.0773852		19	0.6107	0.6045	0.6236	0.6377	0.7814	0.5893	0.6555	0.6508	0.5603	0.7737	0.801	0.6163	0.7066	0.6353	0.6291	0.626		19	0.6321	0.5876	0.5553	0.6166	0.6236	0.6752	0.5716	0.6385	0.7185	0.6564	0.5197	0.5286	0.6097	0.6893	0.7863	0.6761	0.7805
0.644238	0.0579216	0.640729	0.0802965		20	0.6362	0.6306	0.5493	0.6525	0.775	0.6045	0.6143	0.6383	0.5655	0.7028	0.7155	0.6378	0.6895	0.5821	0.6428	0.6711		20	0.6264	0.5862	0.5522	0.6112	0.6365	0.755	0.6062	0.6175	0.6995	0.6426	0.5169	0.5452	0.6002	0.6983	0.8256	0.6353	0.7376
0.62785	0.0648221	0.639518	0.0827167		21	0.5886	0.6104	0.5343	0.6296	0.7128	0.5577	0.5906	0.6112	0.5696	0.6697	0.7686	0.63	0.7182	0.5598	0.655	0.6395		21	0.6383	0.5691	0.5601	0.6156	0.6132	0.7319	0.5824	0.6152	0.6577	0.6757	0.5325	0.5311	0.5939	0.7274	0.8262	0.6393	0.7622
0.630837	0.0620065	0.618388	0.0633859		22	0.5987	0.579	0.5466	0.629	0.7547	0.5383	0.6032	0.6401	0.5643	0.6871	0.7112	0.6463	0.6805	0.5892	0.6344	0.6908		22	0.6565	0.5768	0.5855	0.597	0.6591	0.7014	0.5904	0.6106	0.6173	0.6611	0.5129	0.5192	0.5322	0.6431	0.7286	0.6177	0.7032
0.622513	0.0707217	0.619612	0.0710109		23	0.5632	0.5107	0.5349	0.6828	0.7372	0.5515	0.6351	0.6237	0.5526	0.6863	0.7289	0.6358	0.6925	0.5649	0.6134	0.6467		23	0.6716	0.6264	0.5485	0.601	0.6308	0.6903	0.5876	0.5979	0.6066	0.6717	0.5071	0.5079	0.5375	0.6386	0.7703	0.6308	0.7088
0.603819	0.0617811	0.600759	0.058199		24	0.5483	0.5217	0.5308	0.6716	0.7134	0.5368	0.6159	0.6038	0.5577	0.6464	0.6981	0.576	0.6506	0.5434	0.6052	0.6414		24	0.6355	0.5956	0.5431	0.5987	0.6288	0.6788	0.5609	0.5997	0.6164	0.6301	0.5083	0.4971	0.5256	0.6181	0.7061	0.6089	0.6612
0.597725	0.0650921	0.601553	0.059617		25	0.5525	0.5232	0.5417	0.6525	0.7309	0.5375	0.6025	0.5736	0.5402	0.6524	0.7194	0.5628	0.6224	0.5437	0.5732	0.6351		25	0.643	0.5753	0.5395	0.5908	0.6234	0.6741	0.5684	0.6033	0.6491	0.6239	0.5015	0.5002	0.5235	0.617	0.6904	0.6251	0.6779
0.595175	0.0709647	0.597465	0.0599324		26	0.5361	0.5212	0.5232	0.7013	0.7375	0.5315	0.5817	0.5705	0.5521	0.6577	0.6956	0.5595	0.6432	0.5301	0.565	0.6166		26	0.666	0.5816	0.5376	0.5923	0.6016	0.6729	0.5653	0.5934	0.6376	0.617	0.4994	0.4895	0.5112	0.6335	0.676	0.6313	0.6507
0.591075	0.0702238	0.5944	0.0596146		27	0.5432	0.5218	0.4992	0.6784	0.7044	0.5279	0.5793	0.5669	0.5373	0.6511	0.6713	0.5607	0.6823	0.5139	0.5627	0.6568		27	0.657	0.5663	0.5401	0.5842	0.6065	0.6949	0.5476	0.5862	0.5968	0.6405	0.5189	0.4888	0.5174	0.62	0.683	0.6073	0.6493
0.587475	0.0616533	0.591365	0.0538064		28	0.5398	0.5233	0.5191	0.6489	0.6996	0.5304	0.5798	0.568	0.5318	0.642	0.665	0.5553	0.6603	0.5235	0.5698	0.643		28	0.6496	0.5874	0.5387	0.592	0.5974	0.663	0.5379	0.5892	0.6266	0.6335	0.5018	0.51	0.5182	0.6103	0.6612	0.5834	0.653
0.579956	0.0645021	0.590782	0.0573532		29	0.5186	0.503	0.5194	0.6497	0.6946	0.5262	0.5656	0.5545	0.5344	0.6398	0.6721	0.5578	0.6479	0.5112	0.5534	0.6311		29	0.6769	0.5681	0.5535	0.6048	0.5942	0.6598	0.5423	0.5834	0.6012	0.6149	0.5067	0.5052	0.5006	0.6145	0.6572	0.5817	0.6783
0.586206	0.0636004	0.592371	0.0586914		30	0.5134	0.5138	0.5165	0.6514	0.7025	0.5454	0.5908	0.5574	0.5432	0.6358	0.6688	0.5634	0.6594	0.517	0.5629	0.6376		30	0.6765	0.5692	0.5443	0.5877	0.6149	0.6752	0.5413	0.5899	0.6121	0.6259	0.503	0.5093	0.4999	0.6177	0.6624	0.5811	0.6599
0.579081	0.0616157	0.589741	0.0572991		31	0.5099	0.5268	0.5117	0.6397	0.6775	0.5215	0.5697	0.5517	0.5221	0.6552	0.6615	0.5625	0.6502	0.5226	0.5545	0.6282		31	0.6869	0.5669	0.5336	0.5923	0.6019	0.6876	0.5383	0.5866	0.5856	0.6207	0.4956	0.5298	0.5151	0.6253	0.6432	0.5679	0.6483
0.579637	0.0613612	0.589129	0.0544142		32	0.5054	0.5432	0.5148	0.6446	0.6944	0.5323	0.5737	0.5461	0.5201	0.646	0.6557	0.5792	0.6328	0.517	0.5391	0.6298		32	0.6856	0.5804	0.5298	0.5991	0.6034	0.6688	0.5457	0.5848	0.5771	0.6029	0.5109	0.542	0.5025	0.6074	0.6689	0.5665	0.6394
0.577631	0.0613134	0.591024	0.0527652		33	0.505	0.5359	0.5194	0.6465	0.6926	0.5212	0.5859	0.55	0.5201	0.6317	0.6664	0.5573	0.6281	0.5263	0.5315	0.6242		33	0.6816	0.5739	0.5204	0.6002	0.5845	0.6406	0.549	0.5824	0.6134	0.6004	0.5056	0.5665	0.5135	0.6116	0.6761	0.5724	0.6553
0.583219	0.0607493	0.591653	0.0502889		34	0.5074	0.5503	0.528	0.6578	0.6877	0.5361	0.5774	0.5448	0.5218	0.6682	0.6516	0.5654	0.613	0.5331	0.5414	0.6475		34	0.686	0.5701	0.5271	0.6121	0.59	0.6318	0.5391	0.5876	0.6158	0.5893	0.507	0.5828	0.5273	0.6214	0.6535	0.5593	0.6579
0.582013	0.0638115	0.587982	0.0448101		35	0.5041	0.5604	0.5421	0.6655	0.7021	0.5214	0.5667	0.5445	0.5205	0.6321	0.6337	0.5422	0.6107	0.5417	0.5367	0.6878		35	0.6777	0.5747	0.5319	0.5936	0.5925	0.6308	0.5381	0.5866	0.6059	0.5919	0.5127	0.593	0.5295	0.6006	0.619	0.5588	0.6584
0.583937	0.0589809	0.597259	0.0489922		36	0.5082	0.5533	0.5432	0.6569	0.6893	0.5259	0.5838	0.5619	0.5275	0.6193	0.6319	0.5608	0.5996	0.5423	0.5428	0.6963		36	0.7179	0.6037	0.5363	0.602	0.6147	0.6198	0.5413	0.5854	0.5961	0.5958	0.539	0.6069	0.5257	0.6155	0.6278	0.5597	0.6658
0.58075	0.058307	0.599453	0.0593445		37	0.511	0.5433	0.5412	0.6582	0.6606	0.5294	0.582	0.5515	0.5262	0.6243	0.6234	0.553	0.6085	0.5373	0.5376	0.7045		37	0.755	0.6142	0.5348	0.6101	0.599	0.6083	0.5468	0.576	0.6118	0.6067	0.5132	0.6049	0.5144	0.599	0.6356	0.5752	0.6857
0.583238	0.0672855	0.601312	0.0592206		38	0.5114	0.5437	0.5487	0.7044	0.6846	0.5396	0.5621	0.547	0.5247	0.634	0.6291	0.5412	0.5948	0.5247	0.534	0.7078		38	0.7429	0.6324	0.5244	0.5896	0.6264	0.5957	0.5333	0.5965	0.6148	0.619	0.5113	0.598	0.5423	0.6029	0.6188	0.5707	0.7033
0.585137	0.0632388	0.608082	0.0625235		39	0.5106	0.5534	0.5674	0.6864	0.6565	0.5386	0.5729	0.5502	0.5302	0.6671	0.6255	0.535	0.5951	0.5369	0.5295	0.7069		39	0.7561	0.6619	0.5249	0.6004	0.6108	0.6222	0.5226	0.5899	0.6037	0.6215	0.5212	0.6052	0.5453	0.6124	0.6644	0.5813	0.6936
0.586356	0.0527866	0.601506	0.0606261		40	0.5145	0.5739	0.5559	0.6695	0.6212	0.5436	0.5773	0.5516	0.5393	0.6495	0.6252	0.5539	0.5901	0.5725	0.5418	0.7019		40	0.7584	0.6352	0.5251	0.5906	0.6014	0.6204	0.5187	0.5802	0.6109	0.626	0.5145	0.5881	0.5376	0.6227	0.6485	0.5832	0.6641
0.580875	0.0491519	0.600288	0.0574807		41	0.5148	0.5654	0.5467	0.628	0.6377	0.5432	0.5837	0.5529	0.5401	0.6304	0.608	0.5522	0.5841	0.5759	0.5297	0.7012		41	0.7533	0.6169	0.5269	0.6047	0.6003	0.6302	0.5302	0.5892	0.5947	0.6326	0.5127	0.5829	0.5407	0.6107	0.6376	0.5825	0.6588
0.585487	0.0480857	0.600894	0.0545163		42	0.5098	0.5795	0.5516	0.618	0.6546	0.5513	0.5864	0.5511	0.5407	0.6067	0.6257	0.5546	0.5794	0.5885	0.5656	0.7043		42	0.7127	0.5991	0.5199	0.6073	0.5908	0.6323	0.5253	0.5822	0.6016	0.6441	0.5138	0.6137	0.5593	0.6039	0.6319	0.5833	0.694
0.588481	0.0537692	0.605735	0.0535972		43	0.5201	0.5869	0.5594	0.6563	0.6466	0.5394	0.5842	0.5506	0.5329	0.6183	0.6429	0.5464	0.5864	0.5955	0.5395	0.7103		43	0.7011	0.5992	0.5309	0.6039	0.5966	0.6211	0.5349	0.5865	0.6138	0.6376	0.5175	0.6238	0.5627	0.61	0.641	0.5966	0.7203
0.586544	0.0570222	0.603347	0.053661		44	0.5168	0.5645	0.5623	0.6659	0.6515	0.5375	0.5786	0.5644	0.5159	0.6523	0.647	0.5406	0.5753	0.5883	0.5317	0.6921		44	0.7102	0.6092	0.5313	0.6004	0.6071	0.613	0.5337	0.6186	0.6095	0.6183	0.5133	0.608	0.5442	0.6197	0.6373	0.5783	0.7048
0.585456	0.0530874	0.6077	0.0542011		45	0.518	0.5679	0.5632	0.6527	0.6571	0.5406	0.5822	0.5586	0.5325	0.6427	0.6287	0.5416	0.5857	0.5705	0.5322	0.6931		45	0.7029	0.6238	0.5289	0.6035	0.6041	0.5986	0.5365	0.5855	0.6311	0.6624	0.5096	0.6116	0.5545	0.6304	0.6535	0.6018	0.6922
0.585669	0.0499638	0.614124	0.0567371		46	0.5287	0.5698	0.5569	0.6349	0.6469	0.5415	0.5752	0.5485	0.5433	0.6412	0.6282	0.5427	0.5932	0.5825	0.5388	0.6984		46	0.7117	0.6353	0.5303	0.5971	0.6147	0.5998	0.5284	0.5975	0.6381	0.6765	0.5248	0.6218	0.562	0.6327	0.6364	0.6173	0.7157
0.576756	0.0487541	0.6075	0.0546018		47	0.5194	0.5459	0.5344	0.6398	0.6196	0.5367	0.5832	0.5519	0.5299	0.6159	0.6355	0.5676	0.5897	0.5416	0.5348	0.6822		47	0.7271	0.6372	0.5398	0.5992	0.598	0.595	0.5327	0.5926	0.6122	0.6399	0.5197	0.6199	0.5551	0.6234	0.6347	0.5984	0.7026
0.579444	0.053154	0.606494	0.0582605		48	0.5219	0.553	0.5327	0.653	0.6347	0.5376	0.5853	0.5522	0.5249	0.6257	0.6356	0.544	0.6028	0.5507	0.5291	0.6879		48	0.7188	0.6266	0.5335	0.5935	0.6117	0.6038	0.523	0.601	0.5907	0.6107	0.5188	0.6403	0.5423	0.618	0.6644	0.5974	0.7159
0.583162	0.0587433	0.606865	0.0587193		49	0.5173	0.5496	0.5465	0.6451	0.6435	0.5233	0.5863	0.5716	0.5313	0.6458	0.6372	0.5513	0.5926	0.5363	0.5338	0.7191		49	0.7404	0.617	0.5341	0.5977	0.6142	0.6232	0.5263	0.5958	0.5848	0.6154	0.5248	0.6182	0.5514	0.605	0.644	0.6034	0.721
0.584219	0.0599038	0.603706	0.0608213		50	0.5161	0.5703	0.5452	0.631	0.6528	0.5231	0.5887	0.5566	0.5402	0.6273	0.6506	0.5505	0.5752	0.5459	0.538	0.736		50	0.7504	0.6111	0.5178	0.5985	0.6238	0.6236	0.5232	0.5799	0.5882	0.614	0.5183	0.6048	0.5516	0.599	0.6367	0.6146	0.7075
0.578231	0.0524886	0.598888	0.0600797		51	0.5243	0.5542	0.5496	0.5897	0.661	0.5253	0.5941	0.5378	0.5395	0.6106	0.6406	0.5582	0.5823	0.5484	0.5331	0.703		51	0.7425	0.5917	0.5157	0.5937	0.6185	0.6055	0.5273	0.5816	0.6104	0.613	0.509	0.584	0.5355	0.6097	0.6483	0.6006	0.6941
0.579344	0.0530776	0.599806	0.059487		52	0.5171	0.5567	0.5593	0.5896	0.6673	0.5371	0.5831	0.5381	0.5439	0.6218	0.6339	0.55	0.591	0.5448	0.5315	0.7043		52	0.7129	0.6107	0.5223	0.594	0.6015	0.6152	0.5246	0.5824	0.6217	0.622	0.5085	0.5799	0.5311	0.6245	0.6517	0.5786	0.7151
0.580519	0.0556325	0.604324	0.0609135		53	0.5201	0.5445	0.5509	0.6305	0.6413	0.5266	0.5727	0.5535	0.5318	0.6457	0.6409	0.5488	0.5896	0.5495	0.534	0.7079		53	0.7049	0.6225	0.5234	0.5953	0.5929	0.6436	0.5311	0.5853	0.6014	0.6318	0.5082	0.5671	0.5353	0.6246	0.6826	0.6088	0.7147
0.5792	0.0546863	0.600565	0.0580275		54	0.5164	0.5349	0.5342	0.6267	0.6388	0.5256	0.575	0.5712	0.5268	0.6545	0.6468	0.5556	0.5897	0.5524	0.5319	0.6867		54	0.7132	0.6155	0.5207	0.599	0.5991	0.6339	0.5268	0.5933	0.5883	0.6218	0.5102	0.5645	0.5386	0.616	0.6643	0.6051	0.6993
0.577875	0.0560625	0.597706	0.0546765		55	0.5144	0.5343	0.5288	0.6205	0.6485	0.5208	0.5745	0.5743	0.5271	0.6581	0.64	0.5441	0.6006	0.5475	0.5299	0.6826		55	0.7039	0.6001	0.524	0.5869	0.6171	0.6305	0.5258	0.5828	0.5969	0.6301	0.5156	0.5842	0.5228	0.6048	0.6497	0.5997	0.6861
0.576944	0.0520657	0.601076	0.054721		56	0.5127	0.5276	0.5474	0.6205	0.6394	0.5303	0.5738	0.56	0.524	0.6402	0.6362	0.5492	0.5967	0.5382	0.5515	0.6834		56	0.6888	0.5933	0.5219	0.593	0.626	0.6303	0.5274	0.5782	0.611	0.6414	0.5202	0.5954	0.5298	0.6185	0.6412	0.5956	0.7063
0.578456	0.053108	0.602571	0.0535903		57	0.5173	0.524	0.5536	0.6273	0.6427	0.5363	0.5833	0.5623	0.5262	0.6252	0.6348	0.5461	0.5966	0.5397	0.5425	0.6974		57	0.7029	0.5997	0.5189	0.5926	0.6242	0.6163	0.5321	0.5902	0.6153	0.6574	0.5211	0.5893	0.5263	0.6399	0.6273	0.617	0.6732
0.580987	0.0571348	0.605341	0.0568846		58	0.5139	0.5405	0.5481	0.6306	0.6523	0.527	0.5751	0.5522	0.5285	0.6385	0.6425	0.5476	0.5949	0.5519	0.5414	0.7108		58	0.7262	0.6053	0.5315	0.5971	0.6246	0.6146	0.5328	0.6029	0.6073	0.6622	0.5078	0.5964	0.5216	0.628	0.6353	0.6271	0.6701
0.583381	0.0559832	0.600129	0.0601069		59	0.5066	0.5636	0.5317	0.6298	0.6553	0.5267	0.5959	0.554	0.5252	0.6536	0.643	0.5517	0.5782	0.5516	0.5722	0.695		59	0.7258	0.588	0.525	0.6018	0.6164	0.6203	0.5281	0.5821	0.5985	0.6437	0.5165	0.5826	0.5162	0.6238	0.6307	0.592	0.7107
0.582812	0.0561909	0.598247	0.0589943		60	0.5054	0.5673	0.5504	0.62	0.6512	0.5274	0.5964	0.5548	0.5196	0.6624	0.6486	0.5591	0.5958	0.5467	0.5331	0.6868		60	0.7079	0.5797	0.5177	0.6065	0.6246	0.6236	0.5245	0.5901	0.5853	0.6369	0.5086	0.5614	0.5363	0.6321	0.6155	0.6049	0.7146
0.577019	0.0525069	0.598788	0.0524487		61	0.5137	0.5461	0.5347	0.623	0.6482	0.5256	0.5792	0.5596	0.5171	0.6275	0.6302	0.5567	0.5937	0.544	0.5437	0.6893		61	0.7192	0.6006	0.5421	0.5918	0.609	0.6192	0.5264	0.5949	0.6006	0.6321	0.5129	0.552	0.5479	0.6079	0.6242	0.6231	0.6755
0.573806	0.0557338	0.599794	0.0536898		62	0.5183	0.5208	0.5347	0.6329	0.6596	0.5205	0.5757	0.5489	0.5214	0.6216	0.6183	0.5432	0.5887	0.5438	0.5382	0.6943		62	0.7177	0.6053	0.5312	0.5921	0.6014	0.6339	0.5401	0.5927	0.6252	0.6325	0.5042	0.56	0.5307	0.609	0.638	0.6262	0.6563
0.575475	0.0566434	0.593824	0.050243		63	0.5142	0.5336	0.5275	0.6452	0.6723	0.5187	0.5764	0.5519	0.5159	0.6202	0.6289	0.5572	0.5861	0.5397	0.5399	0.6799		63	0.7003	0.5907	0.5304	0.5871	0.6027	0.6243	0.528	0.5822	0.6064	0.6172	0.5051	0.5698	0.5356	0.6065	0.6366	0.6096	0.6625
0.57985	0.0520342	0.595494	0.0515266		64	0.5118	0.5474	0.5255	0.6493	0.6601	0.5347	0.5717	0.5579	0.5254	0.6216	0.6461	0.553	0.6004	0.5557	0.5553	0.6617		64	0.7019	0.602	0.5311	0.5979	0.6057	0.6126	0.5286	0.5923	0.6025	0.6174	0.507	0.5599	0.5359	0.6112	0.6316	0.6051	0.6807
0.574694	0.0514188	0.593671	0.0542141		65	0.5031	0.5524	0.5165	0.6501	0.6427	0.5277	0.5887	0.5637	0.5205	0.614	0.6368	0.5434	0.6107	0.541	0.5396	0.6442		65	0.7103	0.6082	0.5197	0.6029	0.5934	0.6222	0.5333	0.5916	0.5952	0.6196	0.5055	0.5469	0.538	0.6076	0.6305	0.5853	0.6822
0.576925	0.0562546	0.595394	0.05053		66	0.507	0.5449	0.5195	0.6639	0.6354	0.5222	0.5763	0.5606	0.5188	0.6168	0.6509	0.5459	0.6269	0.5397	0.5395	0.6625		66	0.7017	0.5981	0.5323	0.5883	0.6037	0.6251	0.5255	0.5868	0.6049	0.6302	0.5123	0.5704	0.547	0.6094	0.6407	0.5742	0.6711
0.577425	0.0529089	0.598335	0.0520011		67	0.5172	0.5307	0.5197	0.6374	0.6379	0.5207	0.591	0.5601	0.5185	0.6206	0.6483	0.5585	0.626	0.5372	0.5556	0.6594		67	0.7097	0.6013	0.5357	0.5826	0.6228	0.6152	0.526	0.5783	0.6015	0.6334	0.5108	0.5665	0.5528	0.627	0.6511	0.5914	0.6656
0.579187	0.0537662	0.602341	0.0588217		68	0.5266	0.5275	0.516	0.6414	0.6543	0.5375	0.5955	0.5631	0.5237	0.6236	0.6458	0.5615	0.6224	0.5245	0.5449	0.6587		68	0.7363	0.6027	0.5312	0.5891	0.6207	0.6169	0.5279	0.5783	0.6053	0.6316	0.5216	0.5486	0.5402	0.6384	0.6534	0.6091	0.6885
0.585006	0.058533	0.600841	0.055156		69	0.5189	0.5364	0.5221	0.6515	0.6655	0.5589	0.6459	0.5685	0.5199	0.6335	0.6498	0.5657	0.6079	0.514	0.5379	0.6637		69	0.7139	0.6153	0.5289	0.5875	0.6315	0.6048	0.5233	0.5815	0.6134	0.6278	0.515	0.56	0.5407	0.6226	0.6346	0.6286	0.6849
0.577363	0.0602095	0.604224	0.0539185		70	0.5159	0.5231	0.5123	0.6585	0.66	0.5372	0.5887	0.5692	0.5255	0.6237	0.6497	0.5459	0.5928	0.5108	0.5414	0.6831		70	0.7131	0.5994	0.528	0.6046	0.6516	0.6165	0.5204	0.5931	0.6187	0.6204	0.5103	0.5879	0.5519	0.6321	0.6269	0.6186	0.6783
0.579806	0.0591437	0.604806	0.052634		71	0.5202	0.5248	0.5199	0.6377	0.6588	0.5351	0.5892	0.5673	0.5242	0.6193	0.674	0.5609	0.5807	0.5264	0.5463	0.6921		71	0.7105	0.613	0.5322	0.5885	0.6256	0.6243	0.5267	0.5949	0.6213	0.6617	0.5173	0.5761	0.5461	0.6244	0.6333	0.6205	0.6653
0.580656	0.0551477	0.604935	0.0544113		72	0.5234	0.5403	0.5231	0.6357	0.6608	0.5317	0.6	0.5816	0.5186	0.6358	0.6824	0.5696	0.5775	0.5396	0.5301	0.6403		72	0.7017	0.6208	0.5353	0.5975	0.6125	0.6332	0.5301	0.5862	0.6209	0.6791	0.5081	0.5583	0.5546	0.6142	0.6391	0.6183	0.674
0.578744	0.0519586	0.607165	0.0554195		73	0.5142	0.5437	0.5144	0.6435	0.6662	0.5331	0.5751	0.5723	0.528	0.6352	0.6507	0.5705	0.5922	0.5416	0.5439	0.6353		73	0.6904	0.5919	0.5282	0.6035	0.5961	0.6465	0.5456	0.59	0.6183	0.6615	0.511	0.5802	0.5455	0.629	0.6391	0.6332	0.7118
0.577325	0.0534701	0.607676	0.0595371		74	0.5112	0.5431	0.5117	0.6388	0.6622	0.533	0.5759	0.5777	0.5191	0.6264	0.6529	0.5592	0.5904	0.5374	0.5465	0.6517		74	0.6982	0.6044	0.5242	0.5923	0.6103	0.6382	0.5344	0.5827	0.6086	0.644	0.5039	0.5924	0.5409	0.6381	0.6428	0.651	0.7241
0.579156	0.0548583	0.608041	0.0537369		75	0.5168	0.5438	0.5202	0.6322	0.6611	0.5387	0.568	0.5627	0.5192	0.6323	0.6703	0.5565	0.6006	0.5457	0.5386	0.6598		75	0.7035	0.6089	0.5222	0.5998	0.6121	0.625	0.5337	0.5792	0.5846	0.6516	0.5219	0.6093	0.5727	0.6478	0.6354	0.6247	0.7043
0.576138	0.0538533	0.6072	0.0530822		76	0.5218	0.5266	0.5125	0.6374	0.6586	0.5297	0.595	0.5563	0.5234	0.613	0.6691	0.5605	0.5947	0.5349	0.5424	0.6423		76	0.7033	0.6023	0.5291	0.596	0.6056	0.6256	0.5232	0.5845	0.5727	0.6471	0.5113	0.6262	0.596	0.6497	0.6431	0.6228	0.6839
0.574625	0.0532097	0.616582	0.0643837		77	0.5255	0.525	0.5169	0.6454	0.6482	0.532	0.5951	0.558	0.523	0.6258	0.6557	0.5509	0.5877	0.5281	0.5327	0.644		77	0.7552	0.5985	0.5292	0.5811	0.6032	0.6538	0.523	0.584	0.5758	0.646	0.5081	0.6278	0.6411	0.6673	0.638	0.6462	0.7036
0.578337	0.0561049	0.626018	0.0688948		78	0.5381	0.5459	0.5112	0.6303	0.6421	0.5293	0.5902	0.5586	0.5149	0.6558	0.6647	0.551	0.5957	0.5304	0.5314	0.6638		78	0.775	0.5914	0.5312	0.5925	0.6191	0.6414	0.5383	0.587	0.5788	0.6608	0.5026	0.6596	0.6838	0.6756	0.6452	0.6561	0.7039
0.583244	0.0570568	0.6328	0.0734104		79	0.5522	0.5718	0.5047	0.6128	0.6466	0.5253	0.5864	0.5602	0.5157	0.6704	0.6802	0.5487	0.6041	0.5423	0.5463	0.6642		79	0.7315	0.5869	0.5338	0.593	0.6088	0.6102	0.5294	0.5933	0.6127	0.6566	0.511	0.705	0.7217	0.6828	0.6664	0.6524	0.7621
0.58645	0.0577167	0.646959	0.0864034		80	0.5682	0.5737	0.504	0.5988	0.6554	0.5338	0.5868	0.5682	0.5216	0.6912	0.6742	0.5382	0.6127	0.5508	0.5438	0.6618		80	0.7084	0.5874	0.5354	0.5864	0.6139	0.6172	0.5366	0.5875	0.6366	0.6696	0.5055	0.7506	0.7501	0.7164	0.7107	0.676	0.81
0.586738	0.0542824	0.661935	0.0966207		81	0.5949	0.5705	0.5043	0.6227	0.6555	0.5437	0.5873	0.5615	0.5131	0.6776	0.637	0.5404	0.6034	0.5511	0.5518	0.673		81	0.6883	0.5974	0.5545	0.6271	0.6205	0.6271	0.5317	0.5879	0.6299	0.6611	0.5124	0.797	0.7971	0.7452	0.7669	0.6788	0.83
0.591962	0.0574064	0.6788	0.125347		82	0.6583	0.5932	0.5057	0.6282	0.6636	0.5307	0.5819	0.5791	0.5113	0.648	0.6343	0.5373	0.5861	0.5593	0.5597	0.6947		82	0.6719	0.5891	0.5401	0.6329	0.5986	0.6353	0.5281	0.5881	0.6274	0.6506	0.5091	0.8923	0.8561	0.7873	0.8014	0.7479	0.8834
0.600975	0.0644113	0.696041	0.144013		83	0.7182	0.6338	0.5101	0.6354	0.6498	0.5302	0.5876	0.5681	0.5175	0.6484	0.6381	0.5463	0.5939	0.5807	0.5459	0.7116		83	0.6789	0.5851	0.5512	0.5983	0.6099	0.6417	0.5264	0.5927	0.6244	0.6559	0.5229	0.907	0.8447	0.8657	0.8227	0.8507	0.9545
0.616806	0.0752163	0.705747	0.152449		84	0.7681	0.7156	0.5195	0.6393	0.6549	0.5366	0.6078	0.5633	0.5087	0.6545	0.6467	0.5529	0.601	0.6309	0.5563	0.7128		84	0.6878	0.602	0.5401	0.5964	0.6235	0.627	0.5313	0.603	0.6011	0.6721	0.5337	0.9011	0.8518	0.9179	0.8795	0.8716	0.9578
0.621881	0.0855768	0.707588	0.161151		85	0.7921	0.7753	0.5236	0.6486	0.6648	0.5362	0.5916	0.5544	0.5143	0.6221	0.653	0.5516	0.5996	0.6615	0.5513	0.7101		85	0.6807	0.6162	0.5191	0.5927	0.617	0.6177	0.5242	0.6204	0.5992	0.6657	0.5191	0.9108	0.8583	0.9117	0.9537	0.8799	0.9426
0.625162	0.0945828	0.724529	0.178692		86	0.8316	0.7812	0.5454	0.643	0.6689	0.5325	0.5839	0.5525	0.5088	0.6224	0.6536	0.5457	0.6101	0.6454	0.5354	0.7422		86	0.6838	0.6334	0.538	0.6028	0.604	0.6378	0.5302	0.5907	0.6105	0.6452	0.5346	0.938	0.8788	0.9682	1.0187	0.9404	0.9619
0.633031	0.0979939	0.738376	0.192491		87	0.8703	0.7584	0.5828	0.6111	0.6679	0.5299	0.6014	0.5708	0.5115	0.6651	0.6578	0.5491	0.6124	0.6228	0.5424	0.7748		87	0.7141	0.632	0.541	0.6068	0.6201	0.6736	0.5266	0.5941	0.6156	0.6356	0.5296	0.9344	0.8851	0.9987	1.1124	0.9707	0.962
0.638569	0.110281	0.743129	0.200976		88	0.9072	0.7836	0.5952	0.6379	0.6556	0.529	0.5732	0.5698	0.5174	0.6492	0.6638	0.5453	0.6034	0.6252	0.5447	0.8166		88	0.736	0.6051	0.5433	0.599	0.6104	0.6779	0.5246	0.5949	0.6356	0.6419	0.5186	0.9427	0.8979	1.0277	1.1345	0.9584	0.9847
0.651863	0.124569	0.734935	0.191313		89	0.9249	0.8271	0.5994	0.6477	0.6331	0.5311	0.569	0.5706	0.514	0.6835	0.6834	0.5441	0.6096	0.6682	0.5471	0.877		89	0.7386	0.5873	0.5431	0.594	0.6032	0.6481	0.5206	0.5946	0.6672	0.6431	0.5203	0.8855	0.9182	0.9678	1.0409	0.9849	1.0365
0.669306	0.142094	0.730447	0.182982		90	0.9577	0.9038	0.6392	0.6511	0.6244	0.5225	0.5812	0.5778	0.52	0.6854	0.6824	0.5477	0.6205	0.7241	0.5457	0.9254		90	0.7333	0.5819	0.5501	0.6006	0.6131	0.6401	0.5274	0.5962	0.6502	0.6693	0.5226	0.911	0.9008	0.9123	0.9768	0.9408	1.0911
0.67445	0.149061	0.742071	0.195327		91	0.988	0.9459	0.6581	0.6297	0.6335	0.5226	0.581	0.5867	0.5121	0.6767	0.6623	0.5668	0.6102	0.7644	0.5504	0.9028		91	0.7674	0.5787	0.5761	0.6038	0.6238	0.6386	0.5268	0.58	0.6434	0.658	0.5308	0.9637	0.95	0.9211	0.9993	0.9152	1.1385
0.674675	0.130917	0.749982	0.19657		92	0.9542	0.8752	0.6611	0.6412	0.6806	0.5394	0.599	0.5841	0.5345	0.6549	0.6916	0.5485	0.6169	0.7905	0.5543	0.8688		92	0.748	0.6273	0.5759	0.6226	0.6223	0.6647	0.5279	0.5921	0.6163	0.683	0.5205	0.9359	0.9881	0.9535	1.0318	0.9059	1.1339
0.670856	0.130805	0.738612	0.1873		93	0.9856	0.8007	0.6795	0.6816	0.646	0.5357	0.5898	0.5732	0.5256	0.6695	0.6992	0.551	0.5901	0.7951	0.5557	0.8554		93	0.763	0.638	0.5631	0.5963	0.6106	0.7105	0.5321	0.5971	0.5901	0.6593	0.5054	0.8745	0.8952	0.962	1.0095	0.9665	1.0832
0.709425	0.168456	0.7596	0.194096		94	1.0393	0.9243	0.7195	0.7656	0.6631	0.5335	0.5918	0.5936	0.5344	0.7337	0.719	0.5467	0.5963	0.8448	0.5379	1.0073		94	0.8443	0.6879	0.605	0.5991	0.6492	0.6464	0.5421	0.6038	0.6092	0.6676	0.5133	0.9625	0.9386	0.8794	1.0218	1.0433	1.0997
0.723681	0.169469	0.779271	0.19722		95	1.0614	0.9668	0.7162	0.7324	0.7143	0.5373	0.6201	0.5848	0.5718	0.8124	0.7224	0.5623	0.5818	0.8215	0.5653	1.0081		95	0.8688	0.7241	0.6822	0.596	0.6457	0.6453	0.5457	0.6269	0.6186	0.6899	0.5094	1.004	0.9572	0.9632	1.0572	1.0355	1.0779
0.743981	0.168968	0.775106	0.198036		96	1.0545	0.8932	0.7532	0.8068	0.6733	0.5382	0.6186	0.6535	0.6217	0.8747	0.7457	0.5743	0.6022	0.852	0.5661	1.0757		96	0.8137	0.7848	0.7068	0.5971	0.6504	0.6665	0.5269	0.613	0.6416	0.6278	0.5051	0.8961	0.9226	0.976	1.1062	1.0589	1.0833
0.771081	0.178065	0.791441	0.204338		97	1.0786	0.9741	0.7951	0.8512	0.7024	0.5374	0.6158	0.6637	0.696	0.9267	0.7635	0.5957	0.6123	0.8954	0.5571	1.0723		97	0.8776	0.7924	0.7616	0.6289	0.6511	0.6646	0.5235	0.6125	0.6531	0.6419	0.5028	0.9364	0.943	1.0075	1.1643	0.9797	1.1136
0.776625	0.17033	0.798147	0.205911		98	1.0456	0.9656	0.8279	0.8684	0.7299	0.5389	0.6183	0.6407	0.7636	0.9555	0.7857	0.6101	0.6048	0.886	0.556	1.029		98	0.8986	0.8237	0.7928	0.6333	0.659	0.656	0.5194	0.6215	0.6218	0.6544	0.5152	0.9625	0.9729	0.9993	1.1585	0.9518	1.1278
0.7793	0.163728	0.805953	0.204555		99	1.0101	0.8986	0.8457	0.8747	0.7481	0.5376	0.6393	0.6323	0.7909	0.9527	0.8513	0.6228	0.6129	0.8659	0.5429	1.043		99	0.9096	0.8234	0.8142	0.6368	0.6676	0.6809	0.5272	0.6486	0.6059	0.6689	0.5094	0.988	0.9808	0.9706	1.157	0.9991	1.1132
0.787456	0.160343	0.816206	0.204828		100	1.0098	0.8746	0.86	0.8899	0.7594	0.5474	0.6734	0.6462	0.7948	0.9725	0.8632	0.6423	0.6018	0.8932	0.5459	1.0249		100	0.9325	0.7985	0.8316	0.6439	0.7103	0.7168	0.5317	0.6697	0.6038	0.6524	0.5041	0.995	0.9958	1.0159	1.1194	1.0414	1.1127
0.813206	0.16962	0.840194	0.21889		101	1.0551	0.9087	0.8652	0.8962	0.7932	0.5427	0.703	0.6861	0.8508	1.0242	0.8671	0.6713	0.608	0.9098	0.558	1.0719		101	0.9928	0.8202	0.8782	0.6441	0.7446	0.759	0.5335	0.6851	0.6015	0.6549	0.5113	1.0097	1.003	1.1029	1.0632	1.0492	1.2301
0.830981	0.185428	0.857082	0.231608		102	1.0945	0.9165	0.8645	0.8924	0.7825	0.5306	0.7174	0.7165	0.8899	1.078	0.8958	0.6903	0.612	0.8962	0.565	1.1536		102	1.0069	0.879	0.8848	0.6715	0.7195	0.7858	0.5214	0.6957	0.6158	0.682	0.5326	1.0134	0.9631	1.076	1.0699	1.0826	1.3704
0.823225	0.186241	0.846671	0.222302		103	1.0363	0.9035	0.8222	0.8975	0.758	0.5295	0.7227	0.7112	0.8632	1.0903	0.8885	0.7009	0.6111	0.8749	0.5621	1.1997		103	0.9466	0.8802	0.8523	0.6763	0.7045	0.7616	0.5369	0.7056	0.634	0.6994	0.5243	1.0126	0.8786	0.9754	1.1652	1.1454	1.2945
0.829263	0.181331	0.842688	0.214823		104	0.9613	0.9274	0.7994	0.9249	0.7828	0.5293	0.7375	0.7127	0.8802	1.098	0.9091	0.7287	0.6291	0.8678	0.5724	1.2076		104	0.9526	0.8427	0.8252	0.6854	0.717	0.7327	0.5425	0.7411	0.6452	0.688	0.5351	1.0416	0.8439	0.9702	1.1654	1.2313	1.1658
0.859538	0.171277	0.840065	0.205197		105	0.9432	0.9681	0.8449	0.9475	0.8222	0.5506	0.7745	0.7517	0.9253	1.1178	0.9887	0.787	0.662	0.8996	0.5995	1.17		105	1.0307	0.8181	0.8116	0.6667	0.736	0.7528	0.5426	0.7522	0.6459	0.6887	0.5385	1.0334	0.8583	1.0059	1.0414	1.2244	1.1339
0.889138	0.160972	0.833929	0.189509		106	0.9718	0.957	0.941	0.9509	0.8638	0.5508	0.8205	0.78	0.9962	1.085	1.0414	0.8466	0.6746	0.9543	0.6576	1.1347		106	1.0243	0.8486	0.8353	0.6747	0.7385	0.778	0.543	0.7461	0.657	0.6737	0.5323	0.9974	0.8768	1.0054	0.9733	1.1279	1.1445
0.894575	0.148146	0.836894	0.18608		107	0.9987	0.9243	0.9295	0.9511	0.8559	0.5655	0.8763	0.7747	1.0061	1.0788	1.0172	0.8374	0.7057	0.9762	0.7064	1.1094		107	0.9806	0.8573	0.8508	0.6799	0.7509	0.7715	0.5565	0.7883	0.6895	0.6659	0.5198	1.001	0.8645	0.9588	0.9998	1.1031	1.189
0.887006	0.129328	0.844524	0.188683		108	0.9586	0.8851	0.8719	0.9345	0.8614	0.6057	0.9005	0.7622	0.9854	1.1054	0.9482	0.8254	0.744	0.9714	0.7526	1.0798		108	1.0183	0.8525	0.8622	0.6574	0.7696	0.7871	0.5591	0.8076	0.7108	0.6807	0.5179	1.0402	0.8558	0.9422	0.9896	1.1244	1.1815
0.874731	0.120554	0.855788	0.195166		109	0.924	0.862	0.9149	0.909	0.835	0.664	0.8429	0.7213	0.9151	1.1378	0.9046	0.8032	0.7409	0.9435	0.8076	1.0699		109	1.0512	0.8957	0.8009	0.7194	0.7643	0.8087	0.5583	0.8084	0.7093	0.6577	0.5371	1.035	0.8453	0.9864	1.0086	1.1916	1.1705
0.902606	0.115518	0.865265	0.186634		110	0.9812	0.8685	0.9712	0.9343	0.8741	0.7401	0.8755	0.7616	0.909	1.1886	0.9109	0.8479	0.7463	0.9127	0.852	1.0678		110	1.0403	0.9599	0.8238	0.7815	0.7622	0.8695	0.5632	0.8314	0.7072	0.6332	0.546	1.0028	0.8702	0.9623	1.0658	1.1438	1.1464
0.927494	0.103734	0.866329	0.180207		111	1.0198	0.8698	0.9566	0.9497	0.8994	0.8305	0.942	0.7863	0.9543	1.1934	0.9471	0.8973	0.7568	0.9167	0.8771	1.0431		111	1.0524	0.9724	0.863	0.7638	0.7799	0.9154	0.5712	0.8526	0.7061	0.6341	0.5411	0.955	0.888	0.9304	1.0848	1.07	1.1474
0.939394	0.0917507	0.872529	0.17898		112	0.9971	0.869	0.9157	0.9369	0.9356	0.8719	0.9869	0.8265	1.0124	1.1562	0.98	0.9269	0.7829	0.9428	0.8469	1.0426		112	1.0696	0.9524	0.8886	0.7043	0.8095	0.9188	0.5801	0.8964	0.7305	0.672	0.5389	0.9223	0.9139	0.9161	1.0931	1.0672	1.1593
0.94925	0.0816968	0.892212	0.183558		113	1.0084	0.904	0.8991	0.9467	0.994	0.8662	0.9514	0.8637	1.0239	1.1446	0.9699	0.9443	0.8158	0.9416	0.8746	1.0398		113	1.1004	0.98	0.9178	0.7376	0.8565	0.9109	0.5743	0.939	0.7407	0.6959	0.5593	0.9471	0.9254	0.9069	1.0965	1.0454	1.2339
0.948294	0.0735699	0.898647	0.174438		114	1.0042	0.9255	0.8734	0.9566	0.9879	0.8568	0.9156	0.8797	0.9812	1.1263	0.9373	0.9546	0.8516	0.9122	0.9494	1.0604		114	1.0827	0.984	0.9838	0.7563	0.9093	0.9144	0.5885	0.9327	0.7405	0.6945	0.5864	0.9442	0.92	0.9517	1.0322	1.0096	1.2462
0.956381	0.0812675	0.923053	0.164507		115	1.0134	0.9024	0.8984	0.9702	1.0084	0.8366	0.9845	0.8986	0.9845	1.1472	0.9169	0.9857	0.871	0.8872	0.9182	1.0789		115	1.0411	0.9691	1.0083	0.764	0.9977	1.005	0.6412	0.9116	0.785	0.6999	0.6299	0.9492	0.958	1.08	0.9793	1.0439	1.2287
0.967325	0.090744	0.930559	0.148114		116	1.0005	0.8477	0.9256	0.9659	1.015	0.8628	1.0244	0.868	1.0213	1.1602	0.9938	0.9658	0.8606	0.9287	0.9157	1.1212		116	1.0106	0.9505	0.957	0.8126	1.0396	1.0726	0.6819	0.9209	0.8374	0.7081	0.6507	0.9826	0.92	1.0624	0.984	1.049	1.1796
0.9795	0.112355	0.937688	0.12669		117	1.0128	0.8032	0.8871	0.9882	0.9895	0.9329	0.9961	0.8156	1.0092	1.1915	1.0332	0.9899	0.8349	0.9983	0.9888	1.2008		117	1.0288	0.9076	0.9695	0.8733	1.0096	1.0884	0.7116	0.9701	0.8644	0.7183	0.7201	0.9776	0.926	0.9868	0.9826	1.0839	1.1221
0.98965	0.116906	0.962918	0.129281		118	0.9922	0.8052	0.8986	1.025	1.0499	1.0249	1.0263	0.8224	0.9828	1.1909	0.974	0.9628	0.8314	0.9948	1.019	1.2342		118	1.1069	0.9597	0.9817	0.8677	1.0407	1.0876	0.7218	0.9416	0.8976	0.7141	0.8174	0.9721	0.9513	1.04	0.9978	1.1	1.1716
0.9855	0.0904659	0.960018	0.113398		119	0.9708	0.8481	0.9137	0.9975	1.0881	1.0408	1.0477	0.885	1.0018	1.1422	0.9412	0.9939	0.8291	0.9694	0.9749	1.1238		119	1.0626	1.0294	0.988	0.8579	1.0423	1.0244	0.7757	0.9067	0.9041	0.7273	0.8413	0.9372	0.9355	1.075	1.0132	1.0562	1.1435
0.990294	0.0737158	0.953318	0.104087		120	0.9725	0.8997	0.9131	0.9703	1.0802	1.1025	1.0302	0.9538	0.9889	1.1298	0.9834	1.003	0.8397	0.9719	0.9993	1.0064		120	0.9645	1.0608	0.9564	0.8875	1.0171	1.0043	0.8009	0.8923	0.8628	0.7975	0.8097	0.9558	0.894	1.0653	1.0189	1.0812	1.1374
1.00397	0.0969176	0.956224	0.1137		121	0.9897	0.8565	0.9027	0.9913	1.0549	1.1428	1.0614	0.9351	0.9597	1.2204	1.0197	0.9686	0.8726	0.9514	1.0664	1.0703		121	0.9302	1.0512	0.9047	0.9083	1.0294	1.0394	0.7925	0.914	0.8294	0.8541	0.8012	0.956	0.8577	1.0579	1.029	1.1547	1.1461
1.00395	0.116637	0.973965	0.117907		122	0.9767	0.7927	0.9053	1.0154	1.0139	1.0513	1.0868	0.9117	1.0019	1.2708	1.0217	0.9256	0.8905	0.9314	1.1053	1.1622		122	0.9713	1.0375	0.8992	0.8951	1.0715	1.0747	0.8491	0.896	0.8526	0.8578	0.7883	0.9434	0.9057	1.1361	1.101	1.1427	1.1354
0.987	0.099109	0.973053	0.110312		123	0.951	0.7833	0.902	1.0315	0.9923	0.9774	1.0747	0.9564	0.9849	1.1913	1.0028	0.9266	0.9077	0.931	1.0171	1.162		123	0.9912	1.0282	0.8935	0.8936	1.0573	1.0819	0.8634	0.9069	0.9225	0.8265	0.7857	0.9239	0.9416	1.1767	1.1272	1.0527	1.0691
0.995912	0.0762471	0.984041	0.0932648		124	0.9795	0.8159	0.9104	1.0236	1.0409	1.0038	1.025	1.0072	1.0252	1.1266	0.9805	0.98	0.9035	0.9736	1.0189	1.12		124	1.0391	1.0271	0.8983	0.8908	1.112	1.0732	0.8483	0.9618	1.006	0.8387	0.859	0.9247	0.9833	1.0892	1.1133	1.0013	1.0626
0.991812	0.0882573	0.983618	0.0913312		125	0.9889	0.8256	0.9172	0.9616	1.0892	1.0111	1.0115	0.9795	1.0465	1.1757	0.9268	1.051	0.8548	0.9493	1.0045	1.0758		125	1.0976	1.0236	0.9068	0.9118	1.1582	1.0653	0.8501	1.0338	0.9797	0.8785	0.8514	0.8977	0.9343	1.0292	1.0053	1.0287	1.0695
0.987631	0.0901464	0.987282	0.0986008		126	1.0175	0.8333	0.9358	0.9137	1.0565	1.052	1.0576	0.9674	0.9866	1.1857	0.9445	1.0513	0.853	0.9173	0.9643	1.0656		126	1.0842	0.9983	0.9148	0.9629	1.1514	1.1352	0.8772	1.0483	0.9153	0.8904	0.8449	0.9109	0.8757	1.0365	0.9672	1.0717	1.0989
0.997562	0.0749109	0.985235	0.108833		127	1.0272	0.8642	0.9664	1.0032	1.0277	1.0869	1.0524	0.9529	0.9788	1.1357	0.9811	0.9838	0.8652	0.9842	0.95	1.1013		127	1.0605	0.9599	0.8929	0.9936	1.1613	1.1339	0.8908	0.9956	0.9229	0.8298	0.8478	0.9161	0.8597	1.0298	0.9995	1.1619	1.093
0.995019	0.082096	0.979071	0.11318		128	1.0087	0.8718	0.9442	1.1043	1.0093	1.1054	0.9885	0.9054	0.9454	1.116	0.9631	0.9361	0.8837	1.0239	0.9933	1.1212		128	0.9915	0.9665	0.842	0.9505	1.191	1.1395	0.9196	0.9657	0.9279	0.8224	0.8448	0.8973	0.9255	0.9942	1.0297	1.2032	1.0329
0.988806	0.0709901	0.988788	0.100248		129	0.9908	0.886	0.9106	1.0322	1.013	1.096	0.9645	0.9168	0.9802	1.1264	0.9546	0.9413	0.9351	0.9755	0.9922	1.1057		129	0.9918	1.0664	0.8772	0.9289	1.1353	1.1799	0.9513	0.9186	0.9416	0.8818	0.8631	0.8851	0.9599	0.974	1.0709	1.1426	1.041
0.981356	0.0827713	0.977353	0.0953218		130	0.9691	0.8504	0.859	0.9401	1.0395	1.0703	1.06	0.9283	1.0136	1.1405	0.9596	0.9123	0.9298	0.9657	0.965	1.0985		130	1.0769	1.0858	0.9091	0.8965	1.0942	1.1434	0.9429	0.8866	0.9586	0.8791	0.8595	0.8748	0.8746	0.9828	1.0242	1.0637	1.0623
0.9973	0.101454	0.975659	0.101027		131	0.993	0.8048	0.8544	0.9438	1.0439	1.0753	1.1426	0.9422	0.9875	1.1692	1.0069	0.9422	0.9338	1.0197	0.9512	1.1463		131	1.0749	1.079	0.8982	0.8926	1.101	1.1148	0.9361	0.9164	0.9531	0.8903	0.8177	0.8691	0.8448	1.0485	0.9866	1.0635	1.0996
0.9975	0.0860764	0.984735	0.0844349		132	1.0203	0.8178	0.8939	0.9481	1.0568	1.0386	1.11	0.9649	0.9517	1.1544	0.9925	0.9588	0.98	1.0125	0.9422	1.1175		132	1.0151	1.0647	0.9078	0.9326	1.084	1.086	0.9215	0.9469	0.9821	0.9072	0.8345	0.9108	0.8985	1.0874	1.0039	1.0434	1.1141
0.988125	0.0632901	1.00013	0.0728657		133	1.0175	0.8549	0.9085	0.9375	1.0547	1.0033	1.0473	0.9964	0.9882	1.1147	0.9741	0.9383	0.9726	0.9758	0.9684	1.0578		133	1.0288	1.0756	0.9487	0.9772	1.0667	1.0556	0.9365	0.9689	1.0037	0.912	0.8434	0.9183	0.984	1.0595	1.0344	1.0728	1.1161
0.999338	0.0551486	1.00537	0.0912978		134	1.02	0.9185	0.9191	0.9433	1.0543	1.041	1.0009	1.0317	1.0511	1.066	1.0463	0.9107	0.9701	0.9552	1.0048	1.0564		134	1.0646	1.07	0.9545	0.9663	1.0345	1.0578	0.9133	0.9715	0.9947	0.9011	0.8646	0.8511	1.0094	1.0564	1.062	1.1709	1.1486
1.00361	0.0473585	0.992147	0.0939289		135	0.9881	0.946	0.9385	0.9955	1.0582	1.0302	0.9841	1.0057	1.0835	1.0434	1.0482	0.912	1.0109	0.965	1.0023	1.0462		135	1.0453	1.0185	0.9555	1.0243	1.0286	1.0773	0.8993	0.9759	0.9548	0.8723	0.8776	0.827	0.9164	1.0474	1.0533	1.1736	1.1194
0.974013	0.0456726	0.989282	0.0935497		136	0.9484	0.9063	0.9127	0.9849	0.9944	0.974	1.0016	0.9493	1.0523	1.0492	0.9732	0.9282	0.9739	0.9238	0.9749	1.0371		136	0.9938	0.9959	0.9707	1.0821	1.0913	1.0838	0.9418	0.9667	0.9839	0.8331	0.8654	0.8719	0.8577	1.016	1.0144	1.1291	1.1202
0.982331	0.0616977	1.00961	0.111565		137	0.9858	0.8648	0.8969	0.981	0.9891	1.0097	1.0795	0.9471	1.0316	1.0905	0.9814	0.963	0.9159	0.9526	0.9777	1.0507		137	1.0228	1.0104	0.9808	1.0602	1.1167	1.1733	0.9745	0.9253	1.0797	0.8209	0.8625	0.908	0.8904	0.9765	1.006	1.1292	1.2261
0.978387	0.076379	0.986424	0.106403		138	0.9816	0.8599	0.8921	0.9674	0.9874	1.0297	1.1168	0.8958	0.9959	1.0582	1.0105	0.9514	0.8579	0.982	0.9702	1.0974		138	1.0352	1.0163	0.9329	0.9829	1.0847	1.1768	0.9626	0.8717	1.0447	0.8106	0.8525	0.8873	0.9008	0.9713	0.9681	1.1129	1.1579
0.995556	0.0916835	0.979412	0.0916937		139	0.9811	0.8889	0.9304	0.9879	0.9913	1.0406	1.1104	0.8672	1.016	1.1162	1.0279	0.9304	0.8406	1.0386	0.9862	1.1752		139	1.0066	1.0349	0.9731	0.9733	1.0619	1.148	0.9872	0.8962	0.991	0.8135	0.8252	0.8831	0.9149	1.0118	0.963	1.0645	1.1018
1.00562	0.08572	0.977976	0.0846842		140	0.993	0.865	0.9441	1.027	1.0517	1.0409	1.057	0.9034	1.04	1.1625	1.0071	0.9225	0.8762	1.0776	0.9946	1.1274		140	0.9795	1.0428	0.987	0.9548	1.0755	1.0952	0.9887	0.9586	0.9394	0.8251	0.867	0.8694	0.89	1.0287	0.964	1.0256	1.1343
1.01461	0.0768597	0.986012	0.0922652		141	1.0199	0.8429	0.9444	1.0124	1.0692	1.0679	1.0653	0.9618	1.0639	1.1545	0.9967	0.9714	0.9216	1.0341	0.9961	1.1117		141	0.9894	1.0874	0.9811	0.994	1.0839	1.0867	0.9674	1.0048	0.9991	0.8428	0.858	0.8611	0.8449	0.9995	0.9674	1.0361	1.1586
1.00308	0.0764955	0.969935	0.0850857		142	0.9852	0.8442	0.9212	1.0016	1.0823	1.0241	1.0965	0.9283	1.0368	1.1234	0.9776	0.967	0.9603	1.0222	0.9615	1.117		142	0.9725	1.0577	0.9344	0.9957	1.0487	1.0933	0.9635	0.9584	0.9962	0.8452	0.8025	0.8994	0.8652	1.0281	0.9082	1.0379	1.082
0.9974	0.0896021	0.973918	0.0703999		143	0.9956	0.8412	0.9109	1.0327	1.1126	1.0052	1.0984	0.8906	1.0097	1.1146	0.9186	0.9414	0.9434	1.0508	0.95	1.1427		143	1.0152	1.0319	0.9549	0.988	0.9937	1.1043	0.9656	0.9536	0.9513	0.8836	0.7968	0.9614	0.9441	1.0497	0.9209	0.9911	1.0505
0.985175	0.0856487	0.991506	0.0717485		144	1.0437	0.8156	0.9089	0.9692	1.0405	1.0001	1.0559	0.8983	1.0151	1.1249	0.9465	0.9279	0.8998	1.0323	0.9561	1.128		144	1.0496	1.0519	0.9976	1.0569	1.0313	1.1231	0.924	0.9654	0.938	0.9011	0.8573	0.9669	0.9408	1.0456	0.9542	0.9628	1.0891
0.984163	0.0827267	1.00632	0.09593		145	1.0625	0.8408	0.8943	0.9057	1.0066	1.0093	1.0095	0.9493	1.0129	1.1441	1.0063	0.9212	0.8867	1.0296	0.9585	1.1093		145	1.0355	1.0781	0.9497	1.0858	1.1269	1.1317	0.8999	1.0029	1.0048	0.887	0.8335	0.9219	0.9038	1.1108	1.0196	0.9804	1.1352
0.988	0.0767567	1.00816	0.0949712		146	1.0448	0.8811	0.8729	0.9138	1.0069	1.0339	1.0005	1.0041	0.9901	1.0872	1.0074	0.9268	0.8681	1.0327	1.003	1.1347		146	1.0458	1.0414	0.9172	1.0373	1.1942	1.1024	0.9102	1.0329	1.0888	0.9154	0.8563	0.9066	0.8757	1.0796	1.0399	1.0043	1.0907
0.992981	0.0765197	1.00855	0.0916972		147	1.0292	0.8651	0.8786	0.951	0.9956	0.9931	1.0578	0.9994	1.0077	1.0535	1.0299	0.96	0.8706	1.0275	1.0073	1.1614		147	1.0374	1.0254	0.9441	1.0437	1.21	1.0772	0.9488	1.0928	1.1017	0.9516	0.8611	0.8623	0.8902	1.0455	1.0253	0.9886	1.0396
0.987112	0.0773263	0.992994	0.0863637		148	1.0365	0.8566	0.8692	0.9572	0.9683	1.008	1.0764	0.9686	1.0282	1.0739	1.0665	0.933	0.894	0.9795	0.956	1.1219		148	1.0016	1.0502	0.9819	0.9938	1.1964	1.047	0.9299	1.0451	0.9926	0.9645	0.832	0.8627	0.892	1.0554	1.0574	0.9511	1.0273
0.975631	0.0729466	0.970571	0.0838579		149	1.0201	0.8486	0.8563	0.9689	0.9675	1.0386	1.0963	0.9597	1.0157	1.0295	1.0256	0.9036	0.8826	0.9827	0.9539	1.0605		149	0.9955	1.0242	0.9932	0.9113	1.1589	1.027	0.9127	1.0104	0.8917	0.8818	0.8642	0.8811	0.8741	0.984	1.068	0.9571	1.0645
0.981675	0.0655147	0.967588	0.0816303		150	1.0327	0.8549	0.8568	1.0272	0.9854	1.024	1.0575	1.0052	0.9748	1.0532	1.006	0.9365	0.8871	0.9947	0.9746	1.0362		150	1.0284	0.9639	0.9557	0.929	1.1263	1.0246	0.9422	1.0353	0.8735	0.8391	0.8719	0.9095	0.8949	0.9667	1.003	0.9652	1.1198
0.998512	0.0793984	0.990106	0.0786117		151	1.039	0.8654	0.8765	1.0934	0.9701	1.0483	1.018	1.0336	0.9808	1.1199	1.0582	0.9635	0.8723	1.0111	0.9421	1.084		151	1.0338	0.9772	0.9239	1.0107	1.1303	1.0282	0.9609	1.026	0.9996	0.8467	0.8524	0.9549	0.9399	1.0112	0.9836	1.0054	1.1471
0.994944	0.0840138	1.00089	0.0848612		152	1.0136	0.8585	0.9062	1.048	0.9495	1.0463	1.0124	1.0033	1.033	1.0961	1.0518	0.9281	0.8567	1.0301	0.9269	1.1586		152	0.9772	0.9984	0.9001	1.0739	1.1203	1.1095	0.93	1.0123	1.0777	0.8481	0.8811	0.9606	0.9113	1.0753	1.0453	1.0087	1.0854
0.977175	0.0871441	0.987365	0.0818986		153	0.995	0.8444	0.9149	0.9523	0.9282	1.0337	0.9909	0.9597	1.0019	1.0651	0.9773	0.8817	0.8608	1.0689	0.9686	1.1914		153	0.9517	1.0263	0.8836	1.0761	1.0599	1.1504	0.9147	0.9745	1.0236	0.8542	0.8982	0.9095	0.9303	1.0769	1.0459	1.0157	0.9937
0.98035	0.08701	0.993918	0.0726686		154	0.9991	0.8879	0.9209	0.9161	0.9703	1.0433	0.9783	0.9472	0.9654	1.133	0.9615	0.8808	0.85	1.064	1.0045	1.1633		154	0.9713	1.0616	0.8966	1.0458	1.0444	1.1117	0.9525	0.9463	0.9943	0.8695	0.9137	0.8951	1.0167	1.0937	1.0182	1.0092	1.056
0.971063	0.0788618	0.985924	0.0700483		155	1.0198	0.8877	0.919	0.9072	0.9631	1.0166	0.9488	0.9122	0.9823	1.1466	0.9605	0.8832	0.8677	1.0471	0.9785	1.0967		155	0.96	1.0168	0.9176	1.0277	1.0886	1.0518	0.9892	0.9496	0.9674	0.8913	0.8843	0.8873	1.0018	1.0828	0.9879	0.9519	1.1047
0.971806	0.0919906	0.976159	0.0650936		156	1.039	0.8632	0.9092	0.9427	0.9605	1.0274	0.9511	0.9011	1.0292	1.1674	0.904	0.8315	0.8858	1.0575	0.9787	1.1006		156	0.9885	0.9538	0.9213	1.0557	1.088	1.0718	0.9148	0.9552	0.9819	0.9146	0.9056	0.8927	0.93	1.0209	0.9702	0.9477	1.082
0.977844	0.0907234	0.9749	0.0793205		157	1.0098	0.8703	0.9229	0.9776	0.9757	1.0547	0.9471	0.9609	0.9761	1.1316	0.9408	0.8145	0.8665	1.0934	0.9733	1.1303		157	1.0103	0.9737	0.9118	1.0936	1.0449	1.1157	0.8417	0.9198	0.9956	0.8799	0.9238	0.8808	0.907	1.035	0.9987	0.9891	1.0519
0.978862	0.0824177	0.988806	0.0848595		158	1.0135	0.8518	0.9441	0.9847	0.9968	1.0548	0.9433	0.9571	0.946	1.0825	0.9819	0.8686	0.8737	1.1152	0.9296	1.1182		158	0.982	1.0103	0.9594	1.1039	1.0575	1.131	0.8362	0.9311	1.0254	0.9014	0.9026	0.852	0.9725	1.0777	0.9999	1.0047	1.0621
0.982762	0.087447	0.994029	0.0891983		159	1.012	0.8387	0.9088	0.9649	1.051	1.0523	0.9607	0.9207	0.9626	1.1021	1.0068	0.9121	0.9145	1.1277	0.8778	1.1115		159	0.9546	0.9874	0.9678	1.0908	1.0884	1.1251	0.8932	0.9827	1.0273	0.9638	0.8823	0.801	1.0035	1.1305	0.9691	0.9553	1.0757
0.984669	0.0935479	0.986412	0.0882443		160	0.9653	0.8626	0.8686	0.9616	1.0371	1.077	0.95	0.9485	0.9892	1.1429	1.0406	0.8931	0.9467	1.1119	0.8495	1.1101		160	0.9711	1.0029	0.9405	1.0219	1.0671	1.1376	0.8944	0.9925	1.0183	0.9745	0.891	0.8011	0.9534	1.1511	0.9784	0.916	1.0572
0.989775	0.0906738	0.992094	0.0822573		161	0.9444	0.8914	0.8819	1.0228	0.9647	1.0582	0.9652	0.972	1.0148	1.13	1.091	0.9068	0.9037	1.0932	0.8622	1.1341		161	0.9972	1.0375	0.9169	1.0295	1.0718	1.1407	0.8746	0.9988	1.0151	0.9543	0.9253	0.8725	0.9633	1.1299	0.9594	0.9022	1.0766
1.00057	0.0959639	1.00094	0.0868597		162	0.9708	0.905	0.8799	1.0766	0.9582	1.0167	1.0251	0.9493	1.0312	1.1771	1.1342	0.9323	0.8761	1.0418	0.8947	1.1401		162	1.0063	1.0178	0.9254	1.0701	1.1302	1.1494	0.8779	1.0254	0.9763	0.9044	0.9176	0.9046	1.0164	1.1011	0.9813	0.9095	1.1022
0.994069	0.088833	0.990565	0.0848422		163	1.0207	0.8689	0.8951	1.0417	0.9755	0.9627	1.0511	0.9362	1.021	1.1868	1.0862	0.8927	0.905	1.0044	0.9421	1.115		163	0.9994	0.9714	0.8792	1.0147	1.1186	1.1253	0.9281	1.0526	0.9383	0.903	0.9024	0.8772	0.99	1.0914	1.0081	0.9299	1.11
0.991294	0.0936513	0.982847	0.0859309		164	1.0176	0.8241	0.9165	0.9758	1.0035	0.9265	1.088	0.9883	1.0517	1.1779	1.0559	0.8654	0.9044	1.0217	0.9364	1.107		164	0.9894	0.9734	0.8792	0.9968	1.0916	1.1087	0.9783	1.0688	0.9157	0.9067	0.8796	0.8754	0.9232	1.081	0.9903	0.9187	1.1316
0.989294	0.0977023	0.974988	0.0923656		165	0.9735	0.8092	0.908	0.9618	1.0455	0.9558	1.0515	1.0382	1.0404	1.1732	1.0682	0.8666	0.878	1.0381	0.9123	1.1084		165	1.0028	0.9484	0.9201	1.0023	1.0733	1.121	0.9721	1.026	0.9479	0.8319	0.8581	0.8451	0.9049	1.1181	0.9501	0.9408	1.1119
0.9847	0.0950103	0.975641	0.100013		166	0.9728	0.8191	0.8496	0.9949	1.0319	0.9756	0.9804	1.0374	0.9861	1.1709	1.043	0.872	0.8972	1.0607	0.9431	1.1205		166	0.9796	0.9548	0.9785	1.032	1.0787	1.1094	0.9431	0.9889	0.9854	0.7903	0.8591	0.8196	0.8953	1.1827	0.9559	0.9912	1.0414
0.981213	0.0898899	0.987894	0.0946009		167	0.9915	0.826	0.8829	1.0217	0.9552	0.977	0.975	1.0187	0.9661	1.1798	0.9962	0.8865	0.908	1.0152	0.9529	1.1467		167	0.9454	0.9676	0.9981	1.0795	1.0997	1.0743	0.9348	1.0124	0.9605	0.8744	0.8665	0.8387	0.9033	1.1946	1.0014	0.9661	1.0769
0.991387	0.0895799	1.00269	0.0903812		168	1.008	0.8128	0.9431	1.0653	1.0054	0.9922	1.0029	1.0104	1.0445	1.1444	1.02	0.8714	0.876	1.0115	0.9223	1.132		168	0.9472	0.92	0.9843	1.0376	1.0913	1.1074	0.9388	1.0253	1.0131	0.9421	0.8893	0.8651	0.954	1.1524	1.0381	0.9577	1.1821
0.981231	0.0916386	0.997206	0.0785654		169	0.9998	0.8377	0.87	1.0549	1.0958	0.98	0.9496	1.0367	0.9724	1.1015	1.0519	0.8489	0.866	1.0481	0.9068	1.0796		169	0.9688	0.8649	0.9749	1.0273	1.0437	1.1234	0.927	1.0274	1.0718	0.9298	0.9034	0.8976	0.9702	1.1057	1.002	1.0001	1.1145
0.9738	0.101563	0.997965	0.0716088		170	0.9747	0.8791	0.8099	1.0168	1.0816	0.976	0.9389	1.0379	0.8928	1.1268	1.0585	0.8256	0.8635	1.1294	0.9379	1.0314		170	0.9969	0.8762	0.9594	1.0608	1.0636	1.1161	0.8916	1.0201	1.0847	0.9597	0.9114	0.9017	0.9884	1.0513	1.0163	1.0248	1.0424
0.97405	0.0959376	1.00584	0.0806566		171	0.9613	0.8641	0.8524	0.9803	1.0046	0.9696	0.9953	0.998	0.8776	1.1685	1.0424	0.8747	0.8685	1.1467	0.9363	1.0445		171	1.0082	0.9204	0.9632	1.0999	1.1139	1.0914	0.8575	0.9998	1.0745	0.9975	0.913	0.8694	1.0032	1.0536	1.0784	0.98	1.0754
0.974531	0.0837961	0.981165	0.0906296		172	1.0124	0.8346	0.9157	0.9744	0.9744	0.9656	0.9919	0.9582	0.9115	1.1339	1.0554	0.898	0.8406	1.0814	0.9747	1.0698		172	0.9945	0.9065	0.934	1.0904	1.0719	1.0468	0.8671	0.9905	1.0391	0.9307	0.8807	0.8133	0.9418	1.0658	1.0985	0.9088	1.0994
0.995988	0.0856567	0.977712	0.0847967		173	1.085	0.8559	0.9435	1.0178	1.0524	1.0136	1.0397	0.9521	0.9612	1.1071	1.0318	0.8956	0.8216	1.0304	1.0085	1.1196		173	0.9537	0.9574	0.8848	1.0603	1.0554	1.09	0.8887	1.0017	1.0572	0.9355	0.864	0.8312	0.925	1.0859	1.027	0.9278	1.0755
0.993919	0.0818371	0.972618	0.0735162		174	1.0398	0.8609	0.9133	1.0223	1.0747	1.0308	1.0436	0.9589	0.9749	1.1045	0.9697	0.9178	0.8479	1.0252	0.9818	1.1366		174	0.9234	0.9716	0.8767	1.0332	1.0099	1.1126	0.8963	0.9595	1.0699	0.9581	0.8788	0.8661	0.9509	1.0329	0.953	0.9696	1.072
0.994056	0.0887238	0.975365	0.0792966		175	1.03	0.857	0.8892	0.9579	1.0535	1.0442	1.0339	0.9795	1.0064	1.138	0.9895	0.9313	0.8222	1.0595	0.9808	1.132		175	0.9234	0.9586	0.8976	1.0591	1.001	1.1671	0.9083	0.9789	1.067	0.9169	0.9222	0.8507	0.9239	0.9875	0.9961	0.9539	1.069
0.988619	0.0935251	0.969141	0.0879097		176	1.0213	0.8379	0.8922	0.941	1.0355	1.0401	1.0041	0.9704	1.0224	1.1844	1.0156	0.8945	0.8422	1.0439	0.9576	1.1148		176	0.9282	0.964	0.906	1.0625	1.0482	1.1641	0.9192	0.9776	1.0137	0.8587	0.8889	0.8237	0.8954	1.0182	1.024	0.9252	1.0578
0.987881	0.0902455	0.975871	0.0949548		177	0.986	0.831	0.9202	0.9724	1.0272	1.0296	0.9883	0.9679	1.0137	1.2093	1.0625	0.8777	0.9076	0.9829	0.9321	1.0977		177	0.9751	1.0019	0.9138	1.0482	1.1242	1.1447	0.9349	0.9812	0.9725	0.8366	0.858	0.8272	0.9161	1.0249	1.0235	0.911	1.096
0.983194	0.0865895	0.996018	0.0921458		178	0.9889	0.8398	0.9103	0.9921	1.0165	0.9836	1.0029	0.9767	0.9789	1.1947	1.0975	0.8681	0.9346	0.9666	0.9153	1.0646		178	0.9952	1.0183	0.9447	1.0959	1.1886	1.1132	0.9614	0.9655	0.995	0.8786	0.8912	0.854	0.9228	1.018	1.0627	0.9301	1.0971
0.997313	0.0852644	1.00246	0.0912133		179	1.0541	0.8984	0.9224	1.0482	0.9944	0.9789	0.99	0.9833	1.0023	1.1872	1.1015	0.8354	0.9269	1.0352	0.9374	1.0614		179	1.015	0.9532	0.9388	1.1485	1.1983	1.0959	0.9586	1.0115	1.0306	0.9022	0.898	0.8661	0.9579	0.9864	1.102	0.9493	1.0296
0.992625	0.0881784	0.996359	0.0901272		180	1.0611	0.9224	0.9046	1.0319	0.9849	1.0238	0.9694	1.0218	1.0214	1.1702	1.0229	0.7686	0.909	1.0581	0.996	1.0159		180	1.0095	0.9099	0.9435	1.1108	1.1783	1.0911	0.9192	1.0249	1.0066	0.9043	0.8973	0.8279	0.9864	1.061	1.0628	0.9703	1.0343
0.994012	0.0922439	1.01202	0.0875615		181	1.0808	0.9077	0.8767	1.0056	0.9758	1.0304	1.0557	0.9804	0.9876	1.1708	0.9691	0.7974	0.8995	1.0807	1.0176	1.0684		181	0.9744	0.9051	1.0588	1.0947	1.1459	1.1221	0.9364	1.0374	0.9992	0.9418	0.9179	0.8502	0.9901	1.1452	1.0029	0.995	1.0873
0.986944	0.0987978	1.01479	0.0736128		182	1.0406	0.8939	0.877	0.9809	0.9456	0.9893	1.0589	0.9481	0.9713	1.2165	0.9738	0.8166	0.8991	1.0767	0.9876	1.1152		182	1.0288	0.9207	1.0836	1.1216	1.1142	1.1237	0.9361	1.003	1.0058	0.9651	0.9284	0.9209	0.9766	1.104	1.0195	0.9512	1.0483
1.00125	0.0979578	1.01432	0.0600173		183	1.0233	0.8998	0.8744	1.0047	1	1.0248	0.9826	0.9837	1.0771	1.2367	1.0165	0.8628	0.8852	1.0501	0.9631	1.1352		183	1.0516	1.0066	0.9814	1.0964	1.1056	1.0906	0.9468	0.9732	1.0399	0.9947	0.9563	0.9637	0.9665	1.0374	1.0412	0.9042	1.0873
1.01185	0.0987717	1.001	0.0530501		184	1.0178	0.8893	0.8593	1.0365	1.0483	1.0249	0.9752	1.0008	1.1077	1.2473	1.0194	0.9395	0.8962	1.0211	0.9592	1.1471		184	0.9792	1.0286	0.9888	1.0443	1.1038	1.0624	0.9724	0.9852	1.0408	0.9821	0.9444	0.9302	0.9795	0.9901	0.9996	0.9048	1.0808
1.00371	0.0929336	0.996165	0.0659003		185	0.9654	0.863	0.8478	1.0747	1.0466	1.0089	0.964	1.0028	1.0432	1.2092	1.0378	0.9587	0.9021	1.0237	0.977	1.1344		185	0.9326	1.0141	1.0482	1.0328	1.118	1.0498	0.9977	0.9927	1.075	0.947	0.9208	0.8641	1.0207	1.0138	0.9915	0.8958	1.0202
0.981931	0.087567	1.00438	0.0867016		186	0.9424	0.8709	0.8729	1.0988	1.0479	0.9899	0.9224	0.9788	0.9411	1.1389	1.0715	0.9101	0.8738	1.0387	0.9289	1.0839		186	0.9486	1.0467	1.1162	1.0451	1.1003	1.0774	0.9679	0.9937	1.1219	0.968	0.8898	0.8232	1.0296	1.0652	1.0014	0.8641	1.0154
0.99535	0.0951306	1.00192	0.0933215		187	0.9816	0.9187	0.8812	1.1064	1.083	1.026	0.9354	0.961	0.9599	1.1513	1.0779	0.8707	0.8929	1.0964	0.8861	1.0971		187	0.9793	1.0147	1.1195	1.035	1.0558	1.1037	0.8854	0.9924	1.122	0.9706	0.8786	0.8507	1.0502	1.053	1.0306	0.8206	1.0705
0.991775	0.093149	0.986124	0.0983726		188	0.981	0.899	0.877	1.1047	1.0568	0.9811	0.9538	0.9742	0.981	1.1377	1.022	0.8749	0.9203	1.0999	0.8676	1.1374		188	0.9926	0.9436	1.0342	1.033	1.0057	1.1123	0.8427	0.9867	1.0764	0.9308	0.8438	0.8431	1.0849	1.0506	1.0345	0.8277	1.1215
