# Supplementary material for: Hypoxia controls plasma membrane targeting of polarity proteins by dynamic turnover of PI4P and PI(4,5)P2
Source: eLife. 2022 Jun 9;11:e79582. doi: 10.7554/eLife.79582 (PMC9242647; doi:10.7554/eLife.79582)
Supplement: Figure 4—source data 1. [file elife-79582-fig4-data1.xlsx]

## Sheet: Figure 4A-PI4KIIIaRNAi
Figure 4 Souce Data 1
								1	2	3	4	5	6	7	8	9	10	11	12	13	14	15	16	17	18	19	20	21	22	23			1	2	3	4	5	6	7	8	9	10	11	12	13	14	15	16	17
WT		RNAi		WT/RNAi			WT																									RNAi
AVG	STDEV	AVG	STDEV	AVG	STDEV
t_C3_PM/Cy	t_C3_PM/Cy	t_C3_PM/Cy	t_C3_PM/Cy	t_C3_PM/Cy	t_C3_PM/Cy		min	t_C3_PM/Cy	t_C3_PM/Cy	t_C3_PM/Cy	t_C3_PM/Cy	t_C3_PM/Cy	t_C3_PM/Cy	t_C3_PM/Cy	t_C3_PM/Cy	t_C3_PM/Cy	t_C3_PM/Cy	t_C3_PM/Cy	t_C3_PM/Cy	t_C3_PM/Cy	t_C3_PM/Cy	t_C3_PM/Cy	t_C3_PM/Cy	t_C3_PM/Cy	t_C3_PM/Cy	t_C3_PM/Cy	t_C3_PM/Cy	t_C3_PM/Cy	t_C3_PM/Cy	t_C3_PM/Cy		min	t_C3_PM/Cy	t_C3_PM/Cy	t_C3_PM/Cy	t_C3_PM/Cy	t_C3_PM/Cy	t_C3_PM/Cy	t_C3_PM/Cy	t_C3_PM/Cy	t_C3_PM/Cy	t_C3_PM/Cy	t_C3_PM/Cy	t_C3_PM/Cy	t_C3_PM/Cy	t_C3_PM/Cy	t_C3_PM/Cy	t_C3_PM/Cy	t_C3_PM/Cy
1.05154	0.0764784	1.11067	0.0955544	1.05088	0.0726174		1	1.1127	1.0178	1.0814	1.0572	0.9542	0.9261	1.048	1.0711	1.0685	1.0956	0.9494	1.1838	0.9806	1.1411	0.9688	0.9881	1.1475	1.1761	1.0504	0.9541	1.1277	1.0038	1.0814		1	1.096	1.0778	1.2825	0.894	1.1948	1.2873	1.0836	1.1322	1.0784	1.136	1.0303	0.9902	1.0595	1.1812	1.0701	0.952	1.2173
1.02384	0.0561069	0.998771	0.0858786	1.01342	0.0713365		2	0.9649	1.0452	1.0791	1.117	1.033	1.1466	1.0016	0.9805	1.1108	0.9396	1.0153	0.9531	1.0387	1.0082	1.0077	1.0859	0.9597	0.9782	1.0272	1.0677	0.9699	0.9973	1.0211		2	0.8952	1.034	0.9546	1.1662	1.0137	0.8905	0.9757	1.096	1.0099	0.9931	0.9208	1.0828	1.1082	1.0077	1.0567	1.0846	0.9311
0.924613	0.0639333	0.890567	0.0892689	0.935687	0.0820475		3	0.9225	0.937	0.8395	0.8258	1.0128	0.9273	0.9505	0.9485	0.8207	0.9647	1.0353	0.8631	0.9807	0.8506	1.0235	0.926	0.8928	0.8456	0.9224	0.9782	0.9023	0.9989	0.8974		3	1.0088	0.8883	0.7629	0.9398	0.7915	0.8222	0.9406	0.7718	0.9117	0.8708	1.0489	0.927	0.8322	0.8112	0.8732	0.9634	0.8516
0.888604	0.153579	0.795488	0.101479	0.7923	0.108035		4	0.9235	0.9737	0.7733	0.6676	1.1153	0.939	1.0755	1.0279	1.1825	1.0225	1.0393	0.7993	0.8609	0.7422	0.8705	0.7074	0.6813	0.7594	0.679	0.8283	0.787	1.0656	0.9169		4	0.7769	0.7557	0.7294	0.7477	0.7177	0.7378	0.8905	0.7317	0.8273	0.8042	0.833	0.7728	0.8289	0.5985	1.0094	0.7671	1.0065
0.809374	0.150538	0.777254	0.130544	0.709025	0.0917779		5	0.8368	0.9085	0.6924	0.6771	1.0138	0.8345	0.857	0.786	1.0928	0.9678	0.9463	0.7676	0.7253	0.772	0.7959	0.6678	0.6452	0.8292	0.5234	0.7369	0.6381	1.1421	0.7591		5	0.7883	0.63	0.7208	0.7223	0.7727	0.7033	0.9459	0.7298	0.901	0.7076	0.6072	0.6738	0.879	0.5659	1.0279	0.7944	0.9911
0.695761	0.123991	0.772075	0.167071	0.651708	0.0817991		6	0.6595	0.7226	0.5374	0.56	0.8478	0.6238	0.6599	0.6201	0.9684	0.9189	0.8099	0.6483	0.5648	0.674	0.8034	0.608	0.5648	0.7299	0.5431	0.7856	0.6117	0.8515	0.6891		6	0.8558	0.5675	0.6915	0.7386	0.749	0.6884	1.0064	0.8404	0.9472	0.5091	0.6497	0.6515	0.8836	0.5544	0.9553	0.7297	1.0698
0.650226	0.112111	0.733692	0.157818	0.614238	0.0886028		7	0.6004	0.7209	0.4583	0.637	0.8844	0.6116	0.6925	0.6703	0.9112	0.7289	0.6235	0.5307	0.5555	0.64	0.6673	0.5327	0.5632	0.7076	0.5159	0.6679	0.5761	0.8124	0.6469		7	0.8458	0.5527	0.5825	0.7332	0.8168	0.7184	0.8923	0.7832	0.9096	0.5138	0.5804	0.6868	0.8446	0.5411	1.0324	0.6945	0.961
0.622052	0.114576	0.720183	0.156312	0.587062	0.0726617		8	0.5822	0.6973	0.4338	0.6816	0.8543	0.5175	0.7314	0.6834	0.825	0.7046	0.5352	0.5413	0.5789	0.6379	0.5381	0.5166	0.5265	0.6987	0.4536	0.6684	0.548	0.783	0.5699		8	0.7217	0.5349	0.6036	0.7028	0.8064	0.6949	0.9255	0.7299	0.8774	0.5106	0.5685	0.6914	0.8691	0.5826	1.0549	0.6292	0.9916
0.588639	0.101331	0.71485	0.157898	0.563462	0.071656		9	0.5069	0.6494	0.4308	0.6347	0.8049	0.5099	0.6707	0.632	0.7402	0.6446	0.511	0.5349	0.6274	0.6544	0.5178	0.52	0.5111	0.677	0.4124	0.5797	0.5393	0.7322	0.4974		9	0.7429	0.5348	0.61	0.6942	0.782	0.6678	0.935	0.7107	0.8241	0.52	0.5812	0.6858	0.8984	0.6216	1.059	0.609	0.9546
0.565809	0.0960712	0.707758	0.152942	0.551342	0.0754734		10	0.4707	0.5993	0.4255	0.5639	0.7916	0.5265	0.6079	0.6269	0.7071	0.5933	0.4691	0.5307	0.6194	0.6704	0.5154	0.5273	0.4994	0.6101	0.3907	0.524	0.5512	0.7087	0.4845		10	0.7886	0.5163	0.6272	0.6812	0.7757	0.6279	0.8714	0.6976	0.7785	0.5233	0.598	0.6915	0.8992	0.6244	1.0519	0.6127	0.9041
0.540722	0.0967651	0.698367	0.148853	0.534383	0.0667707		11	0.4474	0.5681	0.4036	0.5343	0.7336	0.4846	0.617	0.6278	0.6984	0.5399	0.4205	0.5052	0.5988	0.6517	0.5096	0.4915	0.4649	0.629	0.3903	0.4587	0.5296	0.666	0.4661		11	0.7813	0.4865	0.6439	0.6636	0.7731	0.6045	0.8304	0.7037	0.7698	0.5112	0.624	0.6758	0.8449	0.638	1.0013	0.6235	0.847
0.531339	0.103263	0.690504	0.142098	0.525321	0.0663116		12	0.4278	0.5676	0.3974	0.5373	0.6578	0.4686	0.615	0.5869	0.6948	0.5316	0.3885	0.4904	0.6251	0.6812	0.4949	0.4556	0.4719	0.6772	0.3755	0.4421	0.4887	0.6847	0.4602		12	0.7762	0.484	0.6221	0.6919	0.7913	0.6382	0.8605	0.7193	0.7177	0.492	0.6315	0.6545	0.7811	0.6496	0.9524	0.6183	0.8588
0.52763	0.111942	0.689433	0.144342	0.517633	0.0677955		13	0.4277	0.5489	0.3924	0.5094	0.6301	0.4923	0.6222	0.5888	0.6896	0.5236	0.3633	0.506	0.5935	0.7375	0.4772	0.444	0.4638	0.7082	0.3634	0.4414	0.4556	0.699	0.4576		13	0.7871	0.5006	0.5831	0.6874	0.8147	0.6417	0.8676	0.7231	0.6945	0.4717	0.6103	0.6334	0.8082	0.6323	0.9431	0.6303	0.9381
0.522513	0.11088	0.689233	0.150779	0.508125	0.0676721		14	0.4307	0.5579	0.4035	0.5136	0.6216	0.4813	0.6229	0.575	0.6839	0.5143	0.3578	0.4908	0.5926	0.7581	0.4738	0.4464	0.457	0.6685	0.3422	0.4293	0.4637	0.6788	0.4541		14	0.7422	0.5352	0.5642	0.6646	0.8088	0.6497	0.8898	0.6919	0.6854	0.4682	0.5928	0.6301	0.7915	0.629	1.0231	0.6183	0.9569
0.5114	0.105225	0.68375	0.152934	0.501321	0.0698944		15	0.433	0.5544	0.3982	0.5168	0.6002	0.4556	0.5934	0.5572	0.6671	0.5033	0.3471	0.4746	0.5902	0.7268	0.4854	0.4555	0.4644	0.6423	0.3303	0.4039	0.4572	0.6618	0.4435		15	0.6906	0.5211	0.5638	0.6457	0.801	0.6578	0.9268	0.6424	0.6791	0.452	0.59	0.6556	0.7595	0.6332	1.0303	0.6124	0.9554
0.501087	0.106177	0.684633	0.149869	0.503967	0.0750835		16	0.4204	0.5169	0.3788	0.506	0.5756	0.4667	0.5876	0.5465	0.6383	0.4934	0.3425	0.4558	0.5843	0.7317	0.4929	0.4424	0.4761	0.6596	0.3287	0.3894	0.4331	0.6435	0.4148		16	0.7247	0.4939	0.5607	0.6604	0.8195	0.6658	0.9345	0.6112	0.6665	0.4438	0.592	0.6398	0.7708	0.6688	0.9714	0.6276	0.9466
0.502696	0.111329	0.689554	0.1495	0.508625	0.0767331		17	0.4153	0.5076	0.3758	0.4962	0.5685	0.4777	0.5999	0.5407	0.6775	0.4868	0.3378	0.4813	0.6083	0.7268	0.4855	0.4225	0.4655	0.6646	0.3345	0.4017	0.4134	0.6596	0.4145		17	0.7375	0.5029	0.5761	0.6916	0.8575	0.6412	0.8931	0.6089	0.6323	0.4618	0.5951	0.6313	0.8418	0.6677	0.9521	0.646	0.9417
0.494983	0.110815	0.682875	0.142143	0.5067	0.0703728		18	0.3953	0.5186	0.3745	0.4956	0.552	0.4666	0.5992	0.51	0.6734	0.487	0.3292	0.4474	0.6283	0.7037	0.4762	0.4148	0.4491	0.6382	0.3269	0.3962	0.4284	0.6628	0.4112		18	0.7308	0.5048	0.602	0.6884	0.8584	0.6171	0.8771	0.613	0.6173	0.4733	0.6001	0.6387	0.827	0.6536	0.9645	0.6511	0.8866
0.493122	0.107697	0.681146	0.144564	0.503537	0.0671067		19	0.3971	0.5235	0.3834	0.4921	0.5573	0.4396	0.5806	0.5129	0.6711	0.4841	0.3251	0.4449	0.6148	0.6605	0.4908	0.4269	0.4541	0.6196	0.3345	0.3819	0.4479	0.6995	0.3996		19	0.7288	0.5048	0.5963	0.6779	0.8225	0.6509	0.8486	0.6255	0.6235	0.475	0.574	0.657	0.8213	0.6891	0.9738	0.637	0.8486
0.493291	0.111748	0.680108	0.159689	0.496996	0.0641112		20	0.404	0.5108	0.3812	0.4834	0.6004	0.4336	0.5563	0.5193	0.6849	0.4938	0.3185	0.4712	0.5957	0.6693	0.4876	0.4219	0.4532	0.6151	0.3251	0.3727	0.4454	0.7116	0.3907		20	0.6919	0.5051	0.5733	0.692	0.826	0.6809	0.8351	0.6244	0.6083	0.4762	0.561	0.6535	0.848	0.692	1.0049	0.6205	0.8904
0.491622	0.114257	0.677533	0.164599	0.493958	0.0604629		21	0.4077	0.5053	0.366	0.4917	0.6022	0.4371	0.5217	0.5338	0.7138	0.4904	0.3232	0.4723	0.58	0.6816	0.4893	0.4092	0.4662	0.6145	0.3283	0.3772	0.409	0.7012	0.3856		21	0.6584	0.4981	0.5537	0.6482	0.812	0.676	0.8053	0.6358	0.6028	0.4822	0.5767	0.6407	0.819	0.657	1.0692	0.6301	0.9587
0.492039	0.120662	0.6842	0.159361	0.497654	0.0581963		22	0.4206	0.5034	0.3614	0.4906	0.5569	0.4427	0.5072	0.544	0.7026	0.4746	0.3182	0.4619	0.5713	0.7936	0.5116	0.4205	0.4691	0.6029	0.3218	0.3601	0.4235	0.6763	0.3821		22	0.6796	0.4979	0.547	0.6555	0.8085	0.6552	0.8405	0.6497	0.6108	0.4958	0.6099	0.6318	0.7979	0.6326	1.118	0.6495	0.9206
0.478104	0.107213	0.673188	0.146332	0.492183	0.0647194		23	0.4288	0.4921	0.3688	0.4599	0.5121	0.468	0.5181	0.5583	0.618	0.445	0.3134	0.4386	0.5643	0.7827	0.4989	0.4141	0.4211	0.5604	0.3215	0.3514	0.4497	0.6097	0.4015		23	0.6781	0.4828	0.5501	0.7182	0.8026	0.6228	0.8206	0.5977	0.5924	0.5192	0.6004	0.6176	0.8047	0.6242	1.0422	0.6222	0.8756
0.469617	0.0991229	0.652158	0.139523	0.489033	0.0741477		24	0.4219	0.5068	0.3688	0.4393	0.5195	0.4783	0.5347	0.5703	0.5771	0.4442	0.3109	0.4309	0.5801	0.7253	0.4704	0.4067	0.4077	0.5685	0.3124	0.3595	0.4159	0.5489	0.4031		24	0.627	0.472	0.5211	0.6863	0.7891	0.5913	0.7654	0.5805	0.5816	0.5448	0.5872	0.6245	0.8125	0.6314	0.9772	0.57	0.8828
0.474517	0.0917398	0.646854	0.138619	0.480338	0.0669173		25	0.4033	0.515	0.3676	0.4838	0.5587	0.4519	0.5221	0.5801	0.545	0.4394	0.3336	0.4293	0.5649	0.6374	0.4982	0.3778	0.4484	0.5803	0.3195	0.3857	0.414	0.6285	0.4294		25	0.6486	0.4739	0.5206	0.6305	0.7903	0.5983	0.7592	0.6447	0.6141	0.5154	0.6028	0.5648	0.8063	0.6434	0.9354	0.5515	0.8667
0.476091	0.0935364	0.645504	0.146162	0.472963	0.0555582		26	0.4004	0.5159	0.3603	0.471	0.5996	0.4142	0.4852	0.5683	0.5667	0.4794	0.3488	0.4455	0.546	0.6345	0.5274	0.3784	0.4332	0.6191	0.3227	0.4052	0.4169	0.6068	0.4046		26	0.661	0.522	0.4905	0.6559	0.7737	0.6467	0.7381	0.6197	0.5976	0.4885	0.6203	0.5567	0.7392	0.6598	0.8806	0.5459	0.9303
0.504683	0.100078	0.646854	0.137474	0.490762	0.0657847		27	0.3981	0.5029	0.3569	0.4834	0.7065	0.3981	0.5011	0.5068	0.6607	0.5957	0.4599	0.4367	0.5374	0.6259	0.6072	0.4016	0.4587	0.5864	0.357	0.536	0.4121	0.6284	0.4502		27	0.6795	0.585	0.49	0.6239	0.7744	0.6619	0.6955	0.6132	0.6455	0.4821	0.5955	0.569	0.7414	0.6488	0.9112	0.5972	0.8615
0.557013	0.136922	0.6439	0.136878	0.512708	0.0785107		28	0.3999	0.4964	0.3735	0.5084	0.7762	0.4125	0.4958	0.4659	0.8342	0.7462	0.5486	0.4157	0.5524	0.6702	0.6892	0.4583	0.5048	0.6438	0.3987	0.6912	0.4722	0.7372	0.52		28	0.6514	0.5498	0.5107	0.6501	0.7982	0.6101	0.795	0.6453	0.6545	0.4636	0.5876	0.5694	0.7097	0.5942	0.9746	0.5856	0.845
0.608504	0.16573	0.645412	0.13317	0.538863	0.0782338		29	0.4204	0.5158	0.39	0.5791	0.9099	0.4277	0.5002	0.4617	0.8956	0.8256	0.6718	0.4542	0.5443	0.6463	0.767	0.4987	0.5642	0.7442	0.4227	0.7997	0.5522	0.8481	0.5562		29	0.6335	0.5614	0.4953	0.6407	0.7981	0.6213	0.8495	0.6414	0.6934	0.4689	0.6598	0.5507	0.7661	0.6642	0.9475	0.5421	0.8158
0.645722	0.171893	0.643288	0.13775	0.573608	0.081998		30	0.4417	0.5833	0.4384	0.6065	0.9253	0.4713	0.5233	0.4755	1.0202	0.8112	0.826	0.4875	0.5421	0.6058	0.7769	0.5374	0.6374	0.7796	0.4514	0.8295	0.5873	0.8644	0.6296		30	0.6118	0.5428	0.4924	0.6542	0.775	0.5969	0.8476	0.6563	0.72	0.4573	0.5964	0.5417	0.7984	0.6827	0.9404	0.5036	0.8481
0.693074	0.170203	0.647033	0.148953	0.610625	0.0878332		31	0.4851	0.7032	0.5093	0.6354	1.0021	0.5662	0.5869	0.56	1.0444	0.8657	0.859	0.5422	0.5149	0.5989	0.8361	0.6266	0.6492	0.8789	0.4733	0.7997	0.6289	0.9083	0.6664		31	0.5836	0.53	0.4936	0.6286	0.7941	0.5967	0.8335	0.6916	0.7232	0.4497	0.5381	0.5337	0.8129	0.7044	0.997	0.4802	0.8603
0.758226	0.161356	0.653067	0.159663	0.642783	0.0902432		32	0.5714	0.8093	0.5578	0.6889	1.1035	0.7014	0.6519	0.7136	1.0268	0.9221	0.8482	0.6286	0.6007	0.6615	0.8922	0.7123	0.6991	0.9583	0.505	0.8973	0.6835	0.9441	0.6617		32	0.5702	0.5046	0.5178	0.6243	0.8298	0.6165	0.8329	0.6777	0.7046	0.4569	0.5281	0.5539	0.8157	0.7464	1.0484	0.4677	0.9024
0.80033	0.148386	0.654188	0.16383	0.679362	0.0883183		33	0.6332	0.8714	0.6078	0.7139	1.1233	0.7679	0.7396	0.8514	1.071	0.856	0.8311	0.7435	0.6383	0.7242	0.8702	0.8345	0.7295	0.9627	0.5051	0.9305	0.7332	0.9655	0.7038		33	0.5653	0.502	0.5343	0.6523	0.7845	0.6316	0.9004	0.6889	0.7129	0.4598	0.5279	0.5462	0.8549	0.7332	1.1055	0.4946	0.865
0.843178	0.160225	0.654687	0.158097	0.693858	0.100357		34	0.6587	0.9859	0.6498	0.7746	1.2076	0.8244	0.7902	0.8619	1.0602	0.8969	0.8819	0.7883	0.6469	0.8164	0.8842	0.8144	0.7645	0.953	0.5045	1.0156	0.7576	1.0881	0.7675		34	0.5556	0.5132	0.5413	0.6725	0.7821	0.6662	0.8615	0.6979	0.7406	0.4564	0.5283	0.5271	0.8261	0.7608	1.0968	0.5154	0.8262
0.883343	0.177492	0.661963	0.151424	0.706571	0.110713		35	0.7469	0.98	0.667	0.8359	1.3012	0.8211	0.8568	0.9084	1.1683	0.9049	0.9464	0.754	0.7148	0.8929	0.9554	0.7754	0.8039	0.9862	0.5453	1.0112	0.7941	1.2151	0.7317		35	0.5696	0.5256	0.5685	0.7111	0.8232	0.7066	0.8667	0.6532	0.7369	0.4697	0.5265	0.5461	0.7506	0.8082	1.0195	0.5431	0.8295
0.909739	0.16891	0.669437	0.148472	0.716346	0.114954		36	0.7908	0.9681	0.7643	0.866	1.2319	0.8475	0.9898	0.9074	1.2777	0.9583	0.9679	0.7464	0.7477	0.8868	1.067	0.8058	0.8026	1.0486	0.5637	0.9894	0.8084	1.1355	0.7524		36	0.6084	0.5145	0.6267	0.7606	0.8083	0.7275	0.7956	0.6655	0.7579	0.4882	0.5175	0.5696	0.7376	0.7891	0.9927	0.5525	0.854
0.958213	0.166589	0.678829	0.15762	0.727187	0.101391		37	0.8262	1.1021	0.885	0.8316	1.2826	0.9267	1.1375	0.9556	1.312	1.0017	0.959	0.8515	0.802	0.9232	1.1294	0.8606	0.844	1.0623	0.5912	1.0459	0.8353	1.0539	0.8196		37	0.6102	0.5101	0.6476	0.7662	0.8191	0.7122	0.7775	0.7145	0.7496	0.4709	0.5224	0.5617	0.7983	0.7913	1.0486	0.578	0.8833
0.968104	0.135279	0.678971	0.15769	0.733258	0.0945018		38	0.8644	1.0844	0.8842	0.8349	1.1898	0.9202	1.0719	0.9336	1.2139	1.0071	0.9907	0.9281	0.8997	0.9722	1.1102	0.8907	0.8937	1.0409	0.6156	1.0915	0.8486	1.1118	0.8683		38	0.6012	0.5148	0.6197	0.7186	0.8629	0.6766	0.8363	0.7084	0.735	0.4744	0.5629	0.5769	0.794	0.7988	1.0553	0.6157	0.8893
0.965743	0.143431	0.668633	0.151467	0.745858	0.108424		39	0.892	1.1165	0.9166	0.8717	1.2274	0.9418	1.0173	0.9221	1.2063	0.9988	1.0009	0.8935	0.8091	0.9312	1.161	0.8979	0.8394	1.092	0.6049	1.0716	0.898	1.068	0.8341		39	0.5734	0.5049	0.5813	0.685	0.8448	0.6506	0.827	0.6633	0.7534	0.5081	0.5757	0.588	0.7479	0.7478	1.0597	0.6051	0.8798
0.991157	0.162442	0.665371	0.143983	0.764313	0.131784		40	0.9152	1.1276	1.0557	0.9414	1.2801	0.9884	1.0648	0.9671	1.2705	1.0242	1.051	0.9377	0.6971	0.9534	1.1422	0.8959	0.8113	1.0198	0.5794	1.1897	0.9298	1.0418	0.9125		40	0.5798	0.5091	0.5876	0.7143	0.7946	0.6475	0.7645	0.6417	0.7447	0.4923	0.6106	0.5831	0.7095	0.7519	1.0563	0.6006	0.8666
0.993443	0.159886	0.66405	0.142877	0.761404	0.140198		41	0.9567	1.1331	1.0301	0.9669	1.1801	1.0151	1.0848	1.0162	1.2505	1.0561	1.0119	0.9876	0.7011	0.951	1.0948	0.8744	0.7864	1.0866	0.5878	1.2689	0.8648	1.0158	0.9285		41	0.605	0.5289	0.569	0.7388	0.7749	0.6737	0.8103	0.6305	0.7276	0.4576	0.5884	0.5765	0.6997	0.7596	1.0362	0.5738	0.8442
0.998257	0.16317	0.666404	0.147965	0.776604	0.143382		42	0.9936	1.185	0.937	0.8817	1.1978	0.9528	1.1131	1.0104	1.2754	0.9623	1.0279	1.0165	0.7597	0.9939	1.0588	0.8602	0.7981	1.1165	0.5686	1.2502	0.9497	1.1071	0.9436		42	0.6199	0.5449	0.5735	0.7484	0.7987	0.6857	0.8358	0.6208	0.7026	0.4363	0.5952	0.5789	0.7354	0.8147	1.0261	0.5514	0.8164
1.0092	0.171031	0.671562	0.142629	0.788929	0.142096		43	0.8937	1.2213	0.9966	0.8743	1.239	1.0315	1.179	1.0697	1.2158	0.9843	1.0639	0.979	0.7334	1.0118	1.0273	0.8821	0.8426	1.1212	0.5784	1.2571	0.945	1.1884	0.8761		43	0.654	0.5813	0.5831	0.781	0.7985	0.6773	0.7564	0.6253	0.7221	0.4563	0.5865	0.6227	0.7053	0.8362	1.0221	0.572	0.8581
0.995796	0.16645	0.659658	0.126808	0.783033	0.157159		44	0.8199	1.1197	0.9737	0.9039	1.2764	1.1068	1.1589	0.9766	1.241	0.9668	0.9541	0.9807	0.7236	1.0837	1.0087	0.9001	0.8497	1.101	0.6164	1.2842	0.9406	1.0501	0.8667		44	0.6396	0.5935	0.5563	0.7455	0.7668	0.6964	0.7044	0.6255	0.7158	0.4937	0.6008	0.6302	0.671	0.7621	0.9745	0.5456	0.829
1.00254	0.182969	0.652671	0.126829	0.769742	0.152479		45	0.8396	1.1094	0.9854	0.9271	1.4414	1.2852	1.1231	1.0213	1.2092	0.9617	0.8722	1.0304	0.7562	1.0562	0.9572	0.8907	0.917	1.1729	0.6135	1.1798	0.8869	0.9996	0.8225		45	0.6578	0.5932	0.5379	0.6685	0.8188	0.6686	0.6957	0.6355	0.7248	0.4963	0.5869	0.6099	0.6692	0.7015	0.9251	0.5139	0.8121
1.00957	0.165036	0.652846	0.133677	0.780638	0.156572		46	0.9274	1.1745	0.9995	0.9015	1.3069	1.1062	1.1739	0.9797	1.237	1.0004	0.9572	1.0261	0.7782	1.1082	1.0471	0.8998	0.8804	1.1467	0.5856	1.1845	0.8651	1.081	0.8531		46	0.7616	0.5133	0.5369	0.644	0.8218	0.6013	0.6788	0.644	0.7597	0.5009	0.5781	0.6734	0.6697	0.7178	0.9359	0.5003	0.7946
0.973022	0.155006	0.661958	0.13232	0.782208	0.15641		47	0.9606	1.183	0.982	0.9513	1.2637	1.0252	1.0887	0.9181	1.1062	0.9072	0.8982	1.0644	0.7736	1.085	1.0227	0.8903	0.8774	1.0893	0.5542	1.1131	0.8548	1.0184	0.7521		47	0.771	0.5043	0.5511	0.664	0.8068	0.618	0.6626	0.658	0.7824	0.5447	0.5301	0.7281	0.6678	0.7447	0.9934	0.4867	0.7866
0.987191	0.172563	0.66745	0.125699	0.794108	0.176055		48	0.88	1.1471	1.0135	0.8782	1.3209	0.9848	1.1214	1.0285	1.3293	1.0279	0.8995	0.9631	0.7478	0.9959	1.0977	0.823	0.9197	1.1016	0.5968	1.16	0.9173	0.9787	0.7727		48	0.7707	0.5313	0.5439	0.7507	0.8285	0.6686	0.6898	0.6368	0.7274	0.5573	0.5343	0.6666	0.6426	0.7348	1.0103	0.5134	0.7867
1.0059	0.181389	0.667025	0.113537	0.774046	0.147744		49	0.8883	1.1245	1.0648	0.9196	1.3045	1.0748	1.1422	1.0944	1.4014	1.0341	0.8977	0.8799	0.7479	0.9302	1.0442	0.8978	0.9725	1.1337	0.6069	1.2665	0.9135	0.9935	0.8029		49	0.7771	0.5533	0.5464	0.7725	0.7865	0.6577	0.7081	0.6359	0.7279	0.5625	0.5591	0.6279	0.6456	0.7264	0.9578	0.5502	0.7392
1.00719	0.166558	0.668937	0.112668	0.780746	0.134378		50	0.9176	1.1359	0.9633	0.9301	1.256	1.2038	1.0395	1.0753	1.4185	0.987	1.027	0.9392	0.7877	1.025	1.0997	0.8324	0.92	1.1171	0.5998	1.0336	0.944	1.0398	0.873		50	0.7852	0.58	0.5303	0.7898	0.7902	0.6308	0.6492	0.6371	0.7023	0.5866	0.596	0.651	0.6656	0.786	0.9543	0.5342	0.7056
0.996196	0.157093	0.692829	0.119542	0.780133	0.132677		51	0.8626	1.1043	0.9248	0.9215	1.3391	1.2031	1.0422	1.0593	1.2585	1.0279	1.0501	0.9591	0.8303	1.0925	1.0348	0.7967	0.8672	1.0399	0.6363	1.0774	0.9264	1.0174	0.8411		51	0.7731	0.5751	0.5865	0.7786	0.7967	0.6666	0.6419	0.6293	0.7052	0.6152	0.5964	0.6954	0.6833	0.9823	0.9525	0.583	0.7467
0.999565	0.147809	0.705246	0.121007	0.779775	0.125328		52	0.859	1.0648	0.9401	0.9411	1.3167	1.0985	1.1052	1.1152	1.2163	1.0904	0.9421	0.94	0.8719	1.0773	1.1154	0.8975	0.9004	0.9832	0.6096	1.0673	0.8655	1.0898	0.8827		52	0.7485	0.5718	0.6176	0.7452	0.7568	0.6821	0.6797	0.6417	0.7719	0.6346	0.5808	0.7108	0.6758	1.0246	0.9814	0.5901	0.7956
0.9966	0.181158	0.711013	0.133762	0.782692	0.127932		53	0.8968	1.0093	0.9545	0.9225	1.4682	1.1173	0.9931	1.1655	1.2689	1.0013	1.0055	0.927	0.821	1.0585	1.0612	0.9174	0.8346	0.9195	0.574	1.1146	0.8283	1.2038	0.859		53	0.7659	0.5676	0.6033	0.6684	0.8009	0.6938	0.6969	0.6596	0.8816	0.5636	0.5816	0.7187	0.6676	1.0858	0.9314	0.5842	0.7848
1.00141	0.186267	0.707367	0.116703	0.792338	0.128509		54	0.9587	1.0001	0.9474	0.8486	1.3063	1.1228	1.0691	1.2688	1.3379	1.0377	0.8917	0.8601	0.8068	1.0934	1.0603	0.8787	0.8545	0.9419	0.607	1.2599	0.8318	1.2015	0.8474		54	0.7815	0.5968	0.572	0.6866	0.8255	0.7641	0.7032	0.6795	0.8749	0.591	0.6277	0.7027	0.6608	0.8461	0.9856	0.573	0.7888
1.0054	0.186627	0.707483	0.115182	0.804013	0.144539		55	0.9142	0.9982	1.0835	0.9834	1.3407	1.124	1.2074	1.1938	1.2535	1.0523	0.8329	0.8838	0.8426	1.0976	1.1012	0.8358	0.8881	1.0115	0.5304	1.2459	0.8679	1.0515	0.7841		55	0.7748	0.5924	0.6556	0.7992	0.8325	0.6991	0.7243	0.6655	0.794	0.6308	0.6703	0.7224	0.6513	0.7623	0.9938	0.5492	0.8902
0.982704	0.199356	0.725433	0.123256	0.814408	0.159391		56	0.8298	0.9323	1.124	0.8097	1.4455	1.0035	1.1342	1.0803	1.2602	1.0386	0.8558	0.8774	0.8232	1.0699	0.9739	0.8299	0.9229	1.0095	0.523	1.3221	0.8296	1.0793	0.8276		56	0.7716	0.6188	0.6693	0.8451	0.8687	0.6591	0.6792	0.7125	0.7954	0.6823	0.6619	0.7193	0.6685	0.7744	0.9715	0.6097	1.0527
0.976157	0.179738	0.756483	0.128058	0.824746	0.15636		57	0.9194	0.9777	0.9913	0.7626	1.4414	1.0375	1.1858	1.1312	1.2045	1.0303	0.9014	0.8611	0.8056	1.0496	0.95	0.8565	0.8731	0.9438	0.5623	1.1506	0.8034	1.0565	0.956		57	0.7998	0.6368	0.6676	0.8574	0.8727	0.7498	0.6948	0.749	0.7717	0.7095	0.6619	0.7614	0.746	0.7589	0.9305	0.6031	1.1926
0.978922	0.178804	0.765692	0.109754	0.830062	0.140748		58	0.829	1.0667	0.979	0.8908	1.4924	0.9806	1.0707	1.036	1.2034	1.0107	0.8924	0.862	0.8323	1.0351	0.9407	0.8312	0.8696	0.958	0.619	1.2282	0.8472	1.1697	0.8705		58	0.806	0.6128	0.6601	0.8168	0.8673	0.8765	0.7038	0.7226	0.7464	0.7578	0.6591	0.924	0.786	0.7354	0.9547	0.5951	0.997
0.991643	0.185262	0.754658	0.109889	0.854358	0.149714		59	0.7928	1.0675	0.98	0.8989	1.4134	1.0438	1.1423	1.1336	1.3054	0.9712	0.9188	0.8827	0.8507	1.0267	0.8992	0.9069	0.8735	0.9482	0.6444	1.341	0.8363	1.108	0.8225		59	0.7825	0.625	0.6892	0.7654	0.894	0.8567	0.6939	0.7209	0.7296	0.7492	0.6529	0.9437	0.7771	0.7128	0.9698	0.6109	0.9429
1.00843	0.182677	0.756233	0.106118	0.851825	0.137294		60	0.8118	1.1199	1.0725	0.849	1.2843	1.1646	1.1041	1.1956	1.3713	1.0526	0.9772	0.8328	0.881	0.9978	1	0.9283	0.9341	1.063	0.5932	1.2395	0.8218	1.099	0.8005		60	0.8016	0.6516	0.7625	0.7491	0.9047	0.8887	0.6999	0.741	0.7288	0.719	0.6994	0.8889	0.7495	0.6737	0.9505	0.6038	0.9268
0.996613	0.175982	0.771017	0.112425	0.851587	0.138806		61	0.8705	1.0337	0.9881	0.8581	1.3638	1.1166	1.091	1.1115	1.4033	1.0949	0.9304	0.7852	0.8679	0.9741	1.0143	0.8077	0.9457	1.063	0.6243	1.142	0.9347	1.0542	0.8471		61	0.8521	0.6593	0.7453	0.8077	0.8647	0.9675	0.7346	0.7394	0.7334	0.7403	0.6791	0.8338	0.7696	0.7017	0.9447	0.5949	0.9605
0.96323	0.150768	0.789754	0.112049	0.844608	0.134387		62	0.9183	1.0509	0.8964	0.8056	1.3014	1.0059	1.0757	1.0229	1.2829	1.0325	0.9442	0.8307	0.8909	0.9752	0.9958	0.7073	0.9058	1.0214	0.6608	1.0568	0.9098	1.0317	0.8314		62	0.8169	0.6467	0.7512	0.8406	0.8931	1.0014	0.7824	0.7222	0.7698	0.7985	0.7006	0.8386	0.7652	0.7319	0.9573	0.6467	0.89
0.958296	0.142512	0.798067	0.127597	0.85515	0.140306		63	0.9456	1.0487	0.858	0.8492	1.3212	0.9938	1.0023	1.0962	1.2453	0.9902	0.9161	0.8921	0.8614	0.9877	0.9598	0.7798	0.873	0.9953	0.6729	1.04	0.8282	1.0334	0.8506		63	0.7963	0.6406	0.7868	0.8489	0.9827	0.9726	0.7675	0.7673	0.7498	0.7556	0.7458	0.8615	0.7412	0.7159	1.0038	0.6489	0.9022
0.971261	0.172621	0.810571	0.129487	0.864463	0.136049		64	0.8946	1.0498	0.9232	0.8602	1.4462	0.9699	0.9781	1.1497	1.2962	1.0385	0.9507	0.8191	0.8352	0.9697	0.952	0.7978	0.8879	0.9825	0.6527	1.1139	0.869	1.1069	0.7952		64	0.8524	0.6464	0.7408	0.9204	1.0215	0.9667	0.7215	0.8298	0.7411	0.7413	0.7456	0.8903	0.7481	0.7462	1.0798	0.6155	0.94
0.961852	0.169513	0.830658	0.137027	0.876487	0.132566		65	0.8655	1.0561	0.9517	0.9295	1.3209	0.9697	1.048	1.1375	1.3359	1.0598	0.9281	0.7509	0.7933	0.9579	0.986	0.7818	0.8194	1.0181	0.6308	1.0497	0.8989	1.0583	0.7748		65	0.8283	0.6532	0.8214	0.9347	1.0207	1.0083	0.6935	0.8445	0.7468	0.7138	0.7054	0.8855	0.7913	0.8101	1.1586	0.6357	0.9693
0.973909	0.171542	0.854383	0.138066	0.887517	0.132112		66	0.8838	1.0446	0.9276	0.9978	1.3441	0.9854	1.1196	1.1447	1.2556	1.0009	0.9603	0.7673	0.8216	0.9606	0.9963	0.7945	0.8458	1.0621	0.6142	1.128	0.8976	1.1197	0.7278		66	0.8469	0.6667	0.8124	0.9304	0.9831	1.0567	0.785	0.8859	0.8022	0.7488	0.7468	0.9022	0.8184	0.7982	1.139	0.6817	0.9613
0.979348	0.181471	0.866725	0.138802	0.889721	0.127507		67	0.8424	1.0653	0.9236	1.052	1.4018	0.9422	1.0964	1.1269	1.2488	1.0066	0.8868	0.8233	0.8205	1.0173	0.9262	0.8484	0.8247	1.07	0.6346	1.1486	0.8248	1.2394	0.7544		67	0.8957	0.7021	0.7848	0.8621	0.9725	0.9792	0.8113	0.927	0.8245	0.8124	0.7984	0.8976	0.8272	0.8236	1.1905	0.6715	0.9846
0.972765	0.174343	0.879625	0.140024	0.884475	0.10697		68	0.8816	1.059	0.8971	1.0033	1.3957	0.8964	1.0262	1.0505	1.3325	0.9548	0.8512	0.8325	0.7647	1.0021	0.9346	0.7894	0.8879	1.0172	0.6686	1.1828	0.8878	1.1869	0.8708		68	0.9321	0.7028	0.8345	0.8793	0.976	0.9458	0.8044	0.9425	0.8491	0.8164	0.7903	0.8935	0.8697	0.8441	1.3279	0.6964	0.9668
0.948904	0.152563	0.881483	0.143738	0.873896	0.110807		69	0.8389	1.0657	0.8815	0.8801	1.2479	0.9154	1.0271	0.9998	1.2331	0.9834	0.8814	0.7413	0.7953	0.9685	0.9571	0.7091	0.9533	0.9613	0.6982	1.0958	1.015	1.181	0.7946		69	0.8779	0.6995	0.8155	0.9206	0.9294	1.0013	0.8315	0.9132	0.8637	0.7651	0.8136	0.9051	0.8924	0.8278	1.2843	0.6875	0.9755
0.924291	0.142042	0.8913	0.161539	0.864958	0.114466		70	0.7855	1.0732	0.8394	0.8942	1.2093	1.023	1.0478	0.9516	1.0557	0.9937	0.8883	0.6779	0.8036	0.9218	0.9768	0.7514	0.8788	0.9464	0.6986	0.9873	1.0269	1.1233	0.7042		70	0.847	0.726	0.7799	0.9741	0.9445	1.0025	0.856	0.9337	0.911	0.7233	0.838	0.8767	0.9259	0.7885	1.213	0.6513	1.0845
0.928565	0.141639	0.904896	0.150471	0.862183	0.120454		71	0.7496	1.0198	0.8534	0.8662	1.2595	1.0599	1.0547	0.9554	1.1178	1.0109	0.9198	0.6901	0.8225	0.9271	0.9747	0.7985	0.8506	0.9236	0.7155	1.0474	0.9062	1.0779	0.7559		71	0.9216	0.7712	0.8058	0.9589	0.9894	0.9968	0.8739	0.9756	0.935	0.7402	0.8096	0.8155	0.9608	0.8264	1.2161	0.7211	1.1076
0.926713	0.124532	0.915583	0.161407	0.867033	0.117518		72	0.7557	1.0073	0.8329	0.8371	1.133	1.0223	1.0325	0.9402	1.1202	0.972	0.9645	0.7074	0.7958	0.9084	0.9824	0.7855	0.9265	0.9117	0.8071	1.1451	0.8905	1.0453	0.791		72	0.9454	0.7716	0.7208	0.8997	0.9466	0.9702	0.9233	1.0125	0.8986	0.8129	0.7405	0.832	0.9901	0.8726	1.3315	0.748	1.0933
0.919657	0.138754	0.9363	0.200887	0.85155	0.096301		73	0.8356	1.1367	0.8333	0.9047	1.1463	0.958	0.9728	0.9293	1.1923	1.0271	0.889	0.7286	0.739	0.9124	0.8432	0.7269	0.8757	0.8965	0.7963	1.1454	0.8864	1.021	0.7556		73	0.9467	0.7145	0.7112	0.9437	0.9207	0.9742	0.9673	1.0178	0.9155	0.8219	0.7839	0.8589	0.9704	0.8346	1.4867	0.7691	1.1373
0.924274	0.160942	0.9363	0.188918	0.863763	0.0967102		74	0.8125	1.1092	0.8093	0.9272	1.1435	0.9372	0.9996	0.9056	1.2095	1.0768	0.8363	0.7419	0.7702	0.9396	0.8469	0.6846	0.8107	0.895	0.7479	1.2495	0.9329	1.1255	0.7469		74	0.9537	0.7274	0.7544	0.955	0.9248	0.9928	0.9915	1.0275	0.9668	0.7794	0.8553	0.8732	0.9426	0.8321	1.4525	0.7425	1.085
0.926091	0.175766	0.936438	0.162932	0.860517	0.110791		75	0.796	1.0083	0.8608	0.9298	1.2287	0.9867	1.1235	0.9457	1.2064	1.0528	0.8081	0.7346	0.8125	0.8589	0.8526	0.6416	0.8466	0.864	0.7328	1.3176	0.9204	1.0648	0.7069		75	0.9722	0.7506	0.7762	1.1073	0.9476	1.0022	0.9357	0.9985	0.97	0.7684	0.8135	0.8856	0.8597	0.8465	1.3534	0.8739	1.1038
0.921183	0.149791	0.94505	0.162617	0.858004	0.0966059		76	0.8093	0.9554	0.8844	0.9015	1.231	1.0015	1.105	1.0493	1.1475	0.927	0.8524	0.7263	0.8205	0.8367	0.8614	0.6689	0.8832	0.8906	0.7495	1.1307	0.9765	1.0713	0.7073		76	0.9769	0.732	0.7655	1.1345	0.9626	1.0254	0.8845	0.9902	0.9698	0.809	0.7934	0.9227	0.8659	0.828	1.3165	0.9612	1.1819
0.906265	0.143259	0.967292	0.173915	0.854933	0.0954325		77	0.7495	0.9269	0.8779	0.8695	1.2581	1.0509	1.0506	1.0099	1.151	0.911	0.855	0.717	0.7978	0.8605	0.8117	0.6779	0.8401	0.8733	0.7869	1.0259	0.9577	1.0298	0.7552		77	0.9772	0.7239	0.643	1.0785	1.0341	1.1079	0.9494	0.9865	0.9984	0.8528	0.8436	0.9634	0.9193	0.8155	1.2647	1.0026	1.3076
0.895543	0.158632	0.973067	0.177007	0.850742	0.101247		78	0.7433	0.9693	0.854	0.8805	1.3559	0.9417	1.0835	0.9525	1.1683	0.9452	0.8395	0.7086	0.8059	0.8519	0.7563	0.7228	0.8458	0.7935	0.7747	1.0546	0.8895	0.9622	0.698		78	0.9112	0.7892	0.6709	1.031	1.1003	1.1292	0.9888	0.9861	0.956	0.8693	0.8008	0.9764	0.9083	0.8485	1.3203	0.9279	1.3877
0.888904	0.176624	0.962117	0.178811	0.840008	0.104873		79	0.7584	1.0447	0.8723	0.8476	1.3751	0.871	1.0966	0.8698	1.1959	0.9765	0.7776	0.7425	0.7933	0.8802	0.7107	0.7088	0.8092	0.7934	0.6889	1.0974	0.8633	0.9914	0.6802		79	0.8834	0.7979	0.7663	0.9745	1.0372	1.1069	1.0678	0.9772	0.9424	0.7993	0.8221	0.9603	0.8425	0.8739	1.3604	0.9455	1.3118
0.864574	0.171197	0.952083	0.1879	0.828133	0.10209		80	0.7509	1.0354	0.8644	0.7584	1.2598	0.8407	0.9937	0.8254	1.2387	0.9615	0.7906	0.7337	0.7376	0.8929	0.7063	0.683	0.7395	0.7859	0.6591	1.1265	0.8338	0.9641	0.7033		80	0.9536	0.7898	0.8054	0.9652	1.003	1.0201	1.0278	0.9586	0.9583	0.8138	0.7682	0.9177	0.7867	0.8759	1.4578	0.9743	1.1901
0.847652	0.170087	0.952379	0.193096	0.837308	0.113747		81	0.7515	0.98	0.8372	0.7336	1.2099	0.8093	0.9285	0.8479	1.2616	0.919	0.7593	0.6997	0.7077	0.8423	0.7299	0.6641	0.7015	0.7684	0.6605	1.1783	0.8254	0.9158	0.7646		81	0.998	0.8035	0.8608	0.9518	0.9832	0.9752	0.9349	0.9868	0.9785	0.8674	0.7318	0.8161	0.7807	0.816	1.4716	1.0433	1.18
0.857465	0.172233	0.9506	0.171514	0.84255	0.119323		82	0.7394	0.9588	0.8111	0.8026	1.3141	0.832	0.9043	0.8725	1.1786	0.948	0.7374	0.6962	0.6829	0.8329	0.7303	0.703	0.7145	0.8451	0.6689	1.1943	0.846	0.952	0.7568		82	0.9578	0.7934	0.8822	0.9393	0.9882	1.0124	0.9294	1.0154	1.0151	0.8981	0.7183	0.8336	0.8348	0.7965	1.375	0.9436	1.2465
0.8503	0.15922	0.95315	0.169003	0.831138	0.116421		83	0.7476	0.9283	0.7935	0.8324	1.2816	0.8442	0.9329	0.8124	1.1391	0.9738	0.7238	0.7211	0.6922	0.8189	0.7358	0.7469	0.7378	0.7628	0.6714	1.1413	0.8376	0.952	0.7295		83	0.8888	0.7946	0.8895	1.0015	1.0394	1.0039	0.9727	0.9523	0.9747	0.8695	0.75	0.856	0.9591	0.8395	1.4143	0.8662	1.2975
0.8564	0.166313	0.969825	0.165729	0.829363	0.112374		84	0.7738	0.9555	0.7813	0.7945	1.2359	0.8307	0.984	0.7714	1.2257	0.9861	0.7158	0.7681	0.7108	0.8591	0.7025	0.7092	0.753	0.7457	0.6779	1.1304	0.8947	0.9784	0.7127		84	0.8839	0.8059	0.9704	1.0081	1.0296	1.0136	1.0209	0.9318	0.9537	0.8252	0.8044	0.8772	1.0066	0.8921	1.4503	0.9392	1.2698
0.864378	0.165487	0.985446	0.169489	0.846071	0.121159		85	0.7684	0.9297	0.8497	0.8484	1.2582	0.7905	1.0389	0.8271	1.1998	0.9619	0.693	0.7643	0.6959	0.8451	0.679	0.7139	0.7871	0.7816	0.6988	1.1394	0.9046	0.9776	0.7278		85	0.8994	0.8635	0.9496	1.0442	1.0365	1.0757	1.0086	0.9552	0.9597	0.8208	0.7921	0.8986	0.9661	0.9098	1.4583	1.0379	1.2769
0.839422	0.140749	0.99315	0.166422	0.843504	0.110908		86	0.699	0.9214	0.8565	0.838	1.1768	0.7722	0.9778	0.8227	1.0641	0.9227	0.6649	0.7073	0.6852	0.8559	0.6566	0.7087	0.765	0.8385	0.7242	1.0527	0.9319	0.9284	0.7362		86	0.923	0.8664	0.9944	1.0204	1.0418	1.1416	1.0573	0.9914	0.9819	0.9014	0.8337	0.8975	0.9122	0.8752	1.3851	0.9542	1.3394
0.827487	0.145344	0.987804	0.172686	0.839096	0.10567		87	0.6299	0.9852	0.8275	0.8162	1.1595	0.761	0.9363	0.7822	1.0773	0.8969	0.6724	0.7329	0.7545	0.8614	0.6551	0.7383	0.6952	0.8163	0.7172	1.101	0.8488	0.8807	0.6864		87	0.9321	0.8567	0.9295	0.9376	1.0348	1.1289	0.9971	0.9953	0.973	0.8726	0.9257	0.9081	0.8808	0.9	1.4465	0.9445	1.2936
0.826043	0.157068	0.972925	0.162949	0.842775	0.105632		88	0.6834	0.986	0.8691	0.8033	1.2238	0.7445	1.0052	0.7779	1.1472	0.8137	0.7294	0.7391	0.709	0.876	0.6758	0.7269	0.6952	0.7213	0.7104	1.0702	0.8102	0.8131	0.6683		88	0.9313	0.9144	0.9251	0.9186	1.0359	1.0967	0.9881	0.969	0.9951	0.8438	0.9276	0.8983	0.8575	0.9099	1.4018	0.9682	1.1685
0.835957	0.147806	0.996488	0.187437	0.843338	0.0999376		89	0.7494	0.9371	0.9059	0.8226	1.1674	0.7715	1.005	0.8211	1.1715	0.8834	0.7566	0.7622	0.678	0.8535	0.6537	0.7493	0.7176	0.7057	0.7462	1.0644	0.8348	0.8088	0.6613		89	0.9203	0.9023	0.9992	0.9989	1.044	1.2379	1.0883	0.9289	1.0249	0.8289	0.883	0.936	0.8708	0.9128	1.4275	1.0015	1.2467
0.842096	0.167508	1.00598	0.215567	0.828683	0.106428		90	0.7106	0.9145	0.92	0.8245	1.2121	0.8025	1.0556	0.8694	1.1828	0.969	0.73	0.7652	0.6895	0.8292	0.6412	0.7537	0.6717	0.7208	0.6917	1.098	0.7919	0.8928	0.6315		90	0.938	0.8521	1.0405	0.9614	1.0121	1.2857	1.1145	0.9722	1.0197	0.8308	0.8878	0.9193	0.8866	0.9228	1.5321	0.9034	1.3785
0.838487	0.168387	0.99425	0.196177	0.8239	0.109437		91	0.7456	0.9048	0.8701	0.825	1.2228	0.8054	1.0712	0.8012	1.2286	0.9329	0.7206	0.7812	0.7323	0.8211	0.6157	0.7275	0.6851	0.7466	0.6804	1.047	0.7755	0.9142	0.6304		91	0.9297	0.8205	1.0569	1.031	0.9831	1.1723	1.1229	1.0623	1.0546	0.8335	0.8509	0.9591	0.8872	0.9069	1.4809	0.9454	1.2802
0.839943	0.174189	0.990575	0.182705	0.827921	0.101298		92	0.7906	0.9695	0.8407	0.8757	1.2057	0.7781	0.9885	0.8112	1.3344	0.9322	0.743	0.7512	0.7157	0.8098	0.6188	0.7223	0.7046	0.7658	0.6703	1.0353	0.7261	0.8697	0.6595		92	0.8668	0.801	1.018	1.1264	1.0454	1.272	1.0525	1.0119	1.0761	0.8568	0.8378	0.9646	0.911	0.8999	1.4688	0.9556	1.2237
0.838035	0.169276	0.987971	0.176851	0.837821	0.110433		93	0.8086	0.9582	0.8583	0.895	1.2275	0.7832	1.0094	0.8328	1.2454	0.9399	0.7936	0.7745	0.7023	0.8097	0.6281	0.6956	0.6934	0.7208	0.6361	1.0141	0.6668	0.8937	0.6878		93	0.7952	0.8575	1.1144	1.1607	1.1481	1.1688	0.9941	0.9513	1.043	0.874	0.855	0.8824	0.87	0.9225	1.4238	0.958	1.2156
0.842752	0.177697	1.00763	0.181354	0.858642	0.112043		94	0.7496	0.9865	0.8232	0.8612	1.2897	0.8211	1.0338	0.818	1.2796	0.9313	0.777	0.7898	0.7136	0.8403	0.6637	0.655	0.6632	0.7723	0.6945	0.9919	0.658	0.8723	0.6977		94	0.8042	0.9177	1.0098	1.1337	1.195	1.1184	1.0632	0.9902	1.0942	0.8597	0.8512	0.862	0.9029	0.9303	1.4696	0.9563	1.2155
0.844357	0.192586	1.00862	0.175866	0.862304	0.111355		95	0.6981	0.9517	0.8556	0.8111	1.3042	0.8242	1.0622	0.7903	1.3834	0.8945	0.8112	0.7781	0.788	0.8391	0.6741	0.6479	0.6139	0.7646	0.7052	0.9808	0.6838	0.8752	0.683		95	0.8627	0.8687	1.0122	1.0844	1.1759	1.0489	1.0232	1.0266	1.0963	0.8519	0.8243	0.8382	1.0141	0.9863	1.4646	0.9271	1.1884
0.824413	0.175416	0.997496	0.181262	0.851433	0.119506		96	0.697	0.9356	0.8439	0.7855	1.2707	0.7646	1.0387	0.744	1.2241	0.8562	0.8429	0.7527	0.7942	0.8651	0.6955	0.6441	0.6011	0.7623	0.6339	0.9761	0.6829	0.9084	0.642		96	0.8467	0.8019	1.0497	1.0728	1.1015	1.0522	1.0363	0.962	1.1481	0.8329	0.8326	0.8548	0.9464	0.9873	1.4334	0.9119	1.1785
[truncated: 32 more columns]
