# Supplementary material for: Hypoxia controls plasma membrane targeting of polarity proteins by dynamic turnover of PI4P and PI(4,5)P2
Source: eLife. 2022 Jun 9;11:e79582. doi: 10.7554/eLife.79582 (PMC9242647; doi:10.7554/eLife.79582)
Supplement: Figure 4—source data 2. [file elife-79582-fig4-data2.xlsx]

## Sheet: Figure 4A-PI4K-3KD
Figure 4 Souce Data 2
								1	2	3	4	5	6	7	8	9	10	11	12	13	14	15	16	17	18	19	20			1	2	3	4	5	6	7	8	9	10			1	2	3	4	5	6	7	8
WT		RNAi		RNAi*			WT																						RNAi												RNAi*
AVG	STDEV	AVG	STDEV	AVG	STDEV
t_C1_PM/Cy	t_C1_PM/Cy	t_C1_PM/Cy	t_C1_PM/Cy	t_C1_PM/Cy	t_C1_PM/Cy		min	t_C1_PM/Cy	t_C1_PM/Cy	t_C1_PM/Cy	t_C1_PM/Cy	t_C1_PM/Cy	t_C1_PM/Cy	t_C1_PM/Cy	t_C1_PM/Cy	t_C1_PM/Cy	t_C1_PM/Cy	t_C1_PM/Cy	t_C1_PM/Cy	t_C1_PM/Cy	t_C1_PM/Cy	t_C1_PM/Cy	t_C1_PM/Cy	t_C1_PM/Cy	t_C1_PM/Cy	t_C1_PM/Cy	t_C1_PM/Cy		min	t_C1_PM/Cy	t_C1_PM/Cy	t_C1_PM/Cy	t_C1_PM/Cy	t_C1_PM/Cy	t_C1_PM/Cy	t_C1_PM/Cy	t_C1_PM/Cy	t_C1_PM/Cy	t_C1_PM/Cy		min	t_C1_PM/Cy	t_C1_PM/Cy	t_C1_PM/Cy	t_C1_PM/Cy	t_C1_PM/Cy	t_C1_PM/Cy	t_C1_PM/Cy	t_C1_PM/Cy
1.02955	0.0770642	0.98458	0.0593905	1.03124	0.0591218		1	0.9303	1.0194	1.1976	0.9312	1.0257	0.9617	1.149	0.9831	1.0555	1.0599	0.9034	1.0747	0.9717	0.9503	0.9902	1.0719	1.0434	1.0865	1.0932	1.0922		1	1.0449	0.9043	0.9476	1.0319	1.0743	0.961	0.9574	1.0411	0.9719	0.9114		1	0.9474	1.0061	1.0572	1.0422	1.0733	1.0637	1.1423	1.0408
1.00035	0.0707515	0.97338	0.0431165	0.98933	0.0454423		2	1.0352	0.9845	0.8967	1.1233	1.0404	1.1246	1.056	1.0291	0.958	0.9452	1.022	0.9975	0.9512	1.0738	1.0707	0.9148	0.9856	0.9958	0.8733	0.9293		2	0.9862	1.0151	1.073	0.9603	0.9414	0.955	0.9699	0.9557	0.9563	0.9209		2	1.0148	1.0017	0.9861	0.9658	0.9821	1.0384	0.9273	0.9118
0.970115	0.0647937	1.04203	0.0633915	0.97941	0.0494764		3	1.0346	0.9961	0.9057	0.9455	0.9339	0.9138	0.795	0.9877	0.9866	0.995	1.0745	0.9278	1.0771	0.9759	0.9391	1.0133	0.971	0.9177	1.0335	0.9785		3	0.9688	1.0806	0.9794	1.0078	0.9843	1.084	1.0727	1.0032	1.0718	1.1677		3	1.0378	0.9922	0.9567	0.9919	0.9446	0.8979	0.9304	1.0474
0.97462	0.0817027	1.00425	0.105179	0.97999	0.117824		4	0.8664	0.9324	0.9889	0.9141	1.071	0.8076	0.9474	0.9918	1.0311	0.9789	1.0614	1.0176	1.1101	1.022	0.8396	0.9725	0.9084	0.9913	1.0943	0.9456		4	1.0325	0.919	0.8412	0.9646	1.1009	1.0389	0.9803	1.186	1.0864	0.8927		4	0.9543	1.0086	0.8263	0.9683	1.0351	1.1503	0.8874	1.1793
0.9671	0.0781273	0.97867	0.0640518	0.9423	0.0851728		5	0.9605	0.9833	0.8263	0.9864	0.963	0.8877	0.9732	0.8468	1.0268	0.9015	1.1455	0.9966	1.0052	0.9557	0.8608	1.0615	1.0763	0.952	0.9584	0.9745		5	1.0022	0.8736	0.8941	0.926	1.0079	1.0076	0.9648	1.0334	1.0795	0.9976		5	0.9659	0.8458	0.9396	1.0163	0.9271	1.0259	0.9915	1.0578
0.93148	0.1047	0.91373	0.108027	0.87751	0.101851		6	0.9853	1.1303	0.8083	0.7993	0.8294	0.9021	1.0715	0.9168	0.8468	0.8901	0.8635	0.9357	1.0666	0.957	0.7241	0.9594	1.0134	0.9026	1.0628	0.9646		6	1.062	0.9259	0.7401	0.7762	1.0676	0.8904	0.8587	0.9497	0.9809	0.8858		6	0.9894	0.739	0.9297	0.9776	0.8763	1.0013	0.851	0.9061
0.9422	0.0670824	0.91096	0.121956	0.85507	0.0592995		7	0.903	0.9621	0.7782	0.869	0.9052	1.0467	1.0211	0.9288	0.9315	0.9653	0.9535	1.0732	0.969	0.8844	0.9108	1.0198	0.9295	0.9756	0.9153	0.902		7	0.9874	0.8933	0.6814	0.7675	0.9111	1.0256	0.8196	0.9754	0.9844	1.0639		7	0.8229	0.8064	0.9182	0.964	0.9068	0.8698	0.8328	0.8341
0.875135	0.0488603	0.86522	0.122507	0.77186	0.0656549		8	0.7984	0.9009	0.7696	0.8809	0.8686	0.9137	0.9155	0.9086	0.9336	0.8755	0.7951	0.9166	0.8708	0.8462	0.8294	0.9583	0.8739	0.9071	0.8491	0.8909		8	0.8485	0.8068	0.6832	0.8498	0.8914	0.9267	0.7074	1.0303	1.0672	0.8409		8	0.7773	0.7258	0.8461	0.8331	0.8136	0.7151	0.7663	0.8641
0.86825	0.0975063	0.81758	0.132158	0.75137	0.0925374		9	0.7497	0.8721	0.8872	0.8033	0.8317	0.7939	0.7772	0.9831	0.9719	0.8007	0.9638	0.8472	1.0538	0.9028	0.6944	0.9636	0.7503	0.9976	0.8995	0.8212		9	0.7299	0.8832	0.7163	0.6781	0.8454	0.9888	0.6072	0.8073	0.9768	0.9428		9	0.7434	0.6779	0.7933	0.832	0.8881	0.7156	0.7053	0.8737
0.87076	0.0993056	0.76165	0.111943	0.6985	0.098855		10	0.7399	0.8248	0.837	0.8996	0.7687	0.7832	0.9106	0.8199	1.0636	0.8929	0.8423	0.9372	0.7892	0.8515	0.7633	1.1188	0.8357	0.9946	0.9178	0.8246		10	0.6914	0.7811	0.6557	0.7486	0.725	0.9079	0.572	0.7444	0.9217	0.8687		10	0.6793	0.6012	0.7256	0.7939	0.723	0.6573	0.6057	0.9164
0.880315	0.0663747	0.74782	0.130699	0.66026	0.0846516		11	0.853	0.8863	0.8754	0.8625	0.903	0.7443	0.9021	0.829	0.9364	0.9148	0.7841	0.9328	0.8873	0.7544	0.9475	1.0282	0.8796	0.8893	0.8746	0.9217		11	0.701	0.7746	0.6659	0.7136	0.7091	0.932	0.5715	0.6673	1.0118	0.7314		11	0.7185	0.5524	0.6315	0.7192	0.8059	0.6793	0.6028	0.7308
0.827445	0.0672596	0.66207	0.124453	0.66719	0.110732		12	0.7882	0.778	0.7485	0.7953	0.8297	0.7404	0.8184	0.8248	0.8787	0.9437	0.8127	0.8871	0.7765	0.7	0.9408	0.9505	0.8377	0.8323	0.8258	0.8398		12	0.7001	0.5431	0.5807	0.6067	0.6257	0.7572	0.5402	0.6197	0.9557	0.6916		12	0.7047	0.5583	0.6038	0.7668	0.8711	0.6443	0.5601	0.7593
0.826325	0.10815	0.64906	0.130917	0.64297	0.111883		13	0.7977	0.7134	0.6597	0.812	0.6478	0.8741	0.8798	0.8971	0.9347	0.7872	0.8783	0.7798	0.7853	0.7195	0.7438	0.9175	0.8264	1.0156	0.7949	1.0619		13	0.8151	0.5513	0.4973	0.5918	0.5963	0.7416	0.4972	0.5807	0.8008	0.8185		13	0.6731	0.5517	0.6127	0.6477	0.8687	0.6234	0.5304	0.7759
0.76689	0.111239	0.58429	0.126472	0.64054	0.132121		14	0.7353	0.6497	0.6574	0.6714	0.5381	0.702	0.8855	0.8387	0.9096	0.7709	0.8913	0.9833	0.6705	0.7619	0.6681	0.8103	0.743	0.9028	0.7554	0.7926		14	0.7308	0.5472	0.4105	0.5838	0.5083	0.7108	0.4188	0.5013	0.703	0.7284		14	0.7414	0.5143	0.6055	0.6024	0.9318	0.6436	0.5558	0.7283
0.72006	0.0961064	0.52003	0.130634	0.62928	0.161335		15	0.6383	0.6785	0.6521	0.5954	0.5773	0.7095	0.7997	0.7258	0.908	0.79	0.8165	0.8408	0.6385	0.7093	0.6165	0.7659	0.6173	0.8397	0.6682	0.8139		15	0.6457	0.4464	0.3399	0.4558	0.4525	0.6397	0.4398	0.4119	0.7334	0.6352		15	0.8206	0.4664	0.6411	0.554	0.9374	0.5822	0.5244	0.7648
0.694715	0.102668	0.501	0.136106	0.60843	0.138971		16	0.6327	0.6816	0.6116	0.5972	0.585	0.5303	0.7916	0.6917	0.9132	0.7798	0.7552	0.745	0.6854	0.5927	0.5679	0.7592	0.6493	0.8143	0.6665	0.8441		16	0.7045	0.3995	0.3137	0.4449	0.414	0.6206	0.4428	0.4041	0.6934	0.5725		16	0.786	0.4998	0.6162	0.5372	0.8896	0.5628	0.5625	0.6409
0.64738	0.100619	0.47324	0.144021	0.58681	0.14461		17	0.5892	0.5748	0.4824	0.593	0.5237	0.5273	0.7575	0.7015	0.8737	0.6883	0.7026	0.6986	0.5698	0.6452	0.5725	0.742	0.5926	0.6933	0.6184	0.8012		17	0.7245	0.373	0.2903	0.4353	0.3834	0.5691	0.4166	0.3574	0.683	0.4998		17	0.7967	0.4709	0.5734	0.5111	0.8662	0.5467	0.5817	0.6052
0.6281	0.0798817	0.46233	0.1221	0.59812	0.178957		18	0.5419	0.5606	0.5767	0.5465	0.5238	0.5922	0.7262	0.6544	0.7958	0.647	0.6221	0.7085	0.5417	0.5751	0.5739	0.7347	0.6013	0.7501	0.6151	0.6744		18	0.6172	0.4164	0.3009	0.4323	0.386	0.5763	0.3881	0.332	0.653	0.5211		18	0.7421	0.5113	0.5778	0.4878	1.0362	0.5561	0.5996	0.5774
0.58822	0.0969419	0.46904	0.141578	0.61219	0.162074		19	0.4904	0.5721	0.4891	0.5374	0.4638	0.4789	0.6459	0.6054	0.7373	0.6061	0.5796	0.6877	0.5623	0.5392	0.413	0.7592	0.5747	0.7227	0.6057	0.6939		19	0.6243	0.3965	0.2898	0.428	0.3854	0.6283	0.4078	0.3294	0.7168	0.4841		19	0.7937	0.4952	0.5352	0.5067	0.9574	0.6052	0.6393	0.6324
0.554825	0.0955686	0.43999	0.128895	0.57533	0.124136		20	0.4792	0.5142	0.4209	0.4962	0.4361	0.4089	0.6051	0.6048	0.6939	0.6018	0.6429	0.7047	0.5187	0.4968	0.4448	0.6687	0.5853	0.6761	0.4889	0.6085		20	0.6647	0.3674	0.2788	0.4087	0.3738	0.517	0.399	0.2908	0.6147	0.485		20	0.6799	0.4859	0.5198	0.5119	0.8426	0.6001	0.5858	0.6343
0.540185	0.109796	0.4348	0.131261	0.59261	0.172407		21	0.4287	0.452	0.3948	0.4858	0.4384	0.3859	0.6091	0.6691	0.6463	0.625	0.5006	0.8257	0.4767	0.4577	0.5203	0.5787	0.586	0.616	0.4953	0.6116		21	0.6559	0.4417	0.2823	0.3883	0.3147	0.5391	0.4154	0.2862	0.6146	0.4098		21	0.7588	0.5209	0.5236	0.4934	0.9655	0.5977	0.6138	0.6377
0.502205	0.0954178	0.4257	0.11533	0.5646	0.127326		22	0.4679	0.4273	0.4033	0.4224	0.4118	0.3309	0.5204	0.6127	0.6288	0.502	0.4926	0.723	0.4589	0.4383	0.5014	0.6195	0.5525	0.6004	0.4498	0.4802		22	0.6035	0.4261	0.2826	0.402	0.2971	0.5263	0.4218	0.291	0.5747	0.4319		22	0.754	0.5032	0.5538	0.4768	0.7615	0.5992	0.619	0.5056
0.48925	0.100809	0.40291	0.102698	0.57713	0.121952		23	0.4271	0.4548	0.3729	0.4438	0.4371	0.3038	0.5157	0.5419	0.6059	0.4924	0.5236	0.7547	0.4546	0.4014	0.4251	0.5881	0.532	0.5921	0.3899	0.5281		23	0.5627	0.3518	0.2765	0.423	0.3008	0.4692	0.4252	0.2748	0.5395	0.4056		23	0.7197	0.5161	0.5547	0.5054	0.8154	0.5885	0.5732	0.5824
0.4778	0.113684	0.40258	0.117061	0.57359	0.164607		24	0.3939	0.3836	0.3446	0.4155	0.4006	0.3366	0.5768	0.4954	0.6161	0.4822	0.4661	0.7574	0.4046	0.3909	0.3694	0.5662	0.4923	0.6574	0.4387	0.5677		24	0.5842	0.3762	0.2601	0.4243	0.2765	0.4419	0.4253	0.248	0.5656	0.4237		24	0.6514	0.5461	0.5474	0.4616	0.985	0.5641	0.6045	0.5175
0.4497	0.100521	0.42077	0.1273	0.55142	0.123048		25	0.3938	0.3776	0.3013	0.3873	0.3922	0.3319	0.5136	0.4626	0.6137	0.4769	0.487	0.6458	0.3643	0.4091	0.3244	0.589	0.51	0.5677	0.3691	0.4767		25	0.6197	0.4353	0.2891	0.4622	0.2716	0.4587	0.4191	0.2479	0.6026	0.4015		25	0.6766	0.5371	0.5272	0.507	0.7977	0.5623	0.5953	0.4801
0.48473	0.126877	0.39957	0.119001	0.5586	0.12684		26	0.4239	0.4104	0.3493	0.4462	0.375	0.3013	0.5714	0.5397	0.6755	0.4854	0.5047	0.6373	0.3806	0.3724	0.3527	0.7687	0.4944	0.6308	0.3938	0.5811		26	0.6007	0.3784	0.256	0.4125	0.2471	0.4356	0.4286	0.262	0.5423	0.4325		26	0.6475	0.6163	0.5346	0.5164	0.7919	0.5794	0.6398	0.4589
0.472645	0.109101	0.40159	0.11227	0.54698	0.128989		27	0.4296	0.441	0.3515	0.3975	0.392	0.2923	0.5512	0.516	0.6256	0.5075	0.5019	0.6434	0.3831	0.3675	0.4306	0.7076	0.4342	0.6021	0.3904	0.4879		27	0.5855	0.4152	0.2558	0.4461	0.2578	0.4076	0.4332	0.274	0.5365	0.4042		27	0.6048	0.593	0.5318	0.4897	0.7969	0.5408	0.66	0.4588
0.468765	0.114117	0.39509	0.115267	0.53661	0.128843		28	0.395	0.4107	0.3331	0.4364	0.372	0.257	0.5509	0.5128	0.6586	0.4907	0.4916	0.6957	0.4177	0.4001	0.406	0.6453	0.4726	0.6032	0.3907	0.4352		28	0.6001	0.406	0.2535	0.4694	0.26	0.3637	0.4572	0.2589	0.4958	0.3863		28	0.601	0.5399	0.4972	0.4735	0.8445	0.5357	0.5521	0.5236
0.45247	0.104269	0.38821	0.102741	0.54075	0.117264		29	0.3768	0.4514	0.3003	0.3748	0.4132	0.2683	0.5014	0.4938	0.6015	0.4069	0.469	0.6423	0.4055	0.3978	0.3921	0.6433	0.4951	0.5823	0.3667	0.4669		29	0.535	0.4245	0.2514	0.4781	0.2591	0.353	0.4933	0.2656	0.4235	0.3986		29	0.5952	0.5705	0.5475	0.4651	0.803	0.5426	0.5491	0.5243
0.44579	0.105939	0.39588	0.110547	0.55521	0.13378		30	0.3684	0.4164	0.2961	0.3885	0.4015	0.2581	0.4477	0.5102	0.6566	0.417	0.4284	0.5429	0.3932	0.367	0.4031	0.6483	0.5236	0.5832	0.3725	0.4931		30	0.5412	0.4247	0.2552	0.5508	0.2668	0.3606	0.4759	0.2581	0.4266	0.3989		30	0.6057	0.5386	0.5542	0.513	0.8662	0.5662	0.5748	0.5017
0.427285	0.107772	0.40363	0.113529	0.54335	0.105787		31	0.3356	0.4147	0.2924	0.4049	0.371	0.2499	0.4213	0.4914	0.611	0.4088	0.3649	0.5277	0.3627	0.3453	0.3585	0.6644	0.5035	0.5405	0.3496	0.5276		31	0.5306	0.417	0.2625	0.5852	0.2701	0.3445	0.4468	0.2692	0.466	0.4444		31	0.6003	0.5236	0.5594	0.4937	0.7598	0.5685	0.5793	0.5046
0.407635	0.100138	0.39271	0.107313	0.5392	0.119134		32	0.3491	0.4035	0.2945	0.3356	0.3521	0.2539	0.3868	0.4601	0.6124	0.3637	0.3729	0.544	0.3767	0.3521	0.3434	0.6027	0.5104	0.5024	0.3105	0.4259		32	0.5335	0.4227	0.2601	0.5205	0.2577	0.3373	0.4326	0.2647	0.4078	0.4902		32	0.5836	0.5259	0.5145	0.4767	0.8206	0.5226	0.5809	0.5142
0.400755	0.0970353	0.38933	0.102507	0.53228	0.11399		33	0.3314	0.4257	0.3079	0.3586	0.349	0.2684	0.3892	0.4458	0.631	0.3316	0.355	0.4918	0.368	0.3172	0.3406	0.5856	0.5163	0.4583	0.3072	0.4365		33	0.5134	0.3749	0.2698	0.5371	0.2796	0.3594	0.4595	0.2453	0.4009	0.4534		33	0.5527	0.5246	0.5315	0.5094	0.7999	0.5292	0.5271	0.5178
0.379835	0.0837775	0.37264	0.0917214	0.54211	0.122895		34	0.3375	0.4058	0.3185	0.3276	0.3608	0.2481	0.4084	0.4212	0.5818	0.3341	0.3447	0.4491	0.3403	0.2919	0.3101	0.4832	0.4837	0.4758	0.279	0.3951		34	0.5183	0.3809	0.2621	0.4558	0.2735	0.3401	0.4384	0.248	0.3693	0.44		34	0.5513	0.5259	0.4962	0.5056	0.8348	0.5184	0.5755	0.5592
0.37118	0.0979536	0.37349	0.0913988	0.53262	0.124738		35	0.3243	0.3635	0.2755	0.3166	0.3491	0.2377	0.3406	0.4146	0.6022	0.3196	0.3606	0.473	0.3105	0.2764	0.302	0.5139	0.4848	0.5129	0.2739	0.3719		35	0.5533	0.3978	0.2762	0.4189	0.2945	0.3264	0.4305	0.2529	0.3487	0.4357		35	0.5478	0.4913	0.4897	0.5076	0.854	0.5142	0.525	0.5395
0.373455	0.106928	0.37293	0.0909658	0.5481	0.140526		36	0.3306	0.3714	0.2654	0.2858	0.375	0.2504	0.328	0.415	0.5776	0.3074	0.3307	0.4601	0.2893	0.2625	0.3275	0.5773	0.5565	0.4929	0.2712	0.3945		36	0.5242	0.4	0.2681	0.4637	0.2824	0.3386	0.4257	0.2529	0.3385	0.4352		36	0.5417	0.5136	0.5045	0.5268	0.896	0.5376	0.5373	0.5877
0.36036	0.0926114	0.37935	0.0987087	0.54443	0.133675		37	0.339	0.385	0.2718	0.28	0.3563	0.2446	0.3106	0.4	0.5618	0.3021	0.3214	0.4231	0.2881	0.2716	0.2917	0.5144	0.4912	0.4741	0.2758	0.4046		37	0.5093	0.3651	0.2795	0.536	0.2739	0.358	0.4063	0.2536	0.3486	0.4632		37	0.5448	0.4815	0.5331	0.5248	0.8749	0.5308	0.532	0.5686
0.358685	0.101774	0.37721	0.102919	0.54515	0.13031		38	0.3328	0.371	0.266	0.2772	0.3443	0.2538	0.3125	0.3635	0.5497	0.277	0.3365	0.4082	0.2853	0.2597	0.2733	0.5678	0.5267	0.4864	0.2706	0.4114		38	0.4988	0.3436	0.2784	0.5018	0.2724	0.3374	0.4115	0.2559	0.3394	0.5329		38	0.5801	0.4893	0.5159	0.5284	0.8771	0.5301	0.5189	0.5348
0.355495	0.113118	0.37602	0.10596	0.53624	0.112183		39	0.2916	0.4158	0.2894	0.2694	0.3821	0.242	0.2821	0.371	0.6259	0.2738	0.3226	0.372	0.2719	0.2629	0.2566	0.547	0.5489	0.4708	0.253	0.3611		39	0.477	0.3319	0.2786	0.5079	0.289	0.3483	0.3953	0.2646	0.303	0.5646		39	0.5185	0.5089	0.4943	0.5111	0.8116	0.5321	0.5226	0.6077
0.342215	0.101138	0.39039	0.093144	0.54774	0.110938		40	0.2874	0.3751	0.2827	0.2525	0.3694	0.2285	0.3005	0.3657	0.5751	0.2659	0.3053	0.3643	0.2596	0.2686	0.2767	0.5249	0.5066	0.4527	0.2344	0.3484		40	0.4885	0.3701	0.2896	0.4836	0.2993	0.3863	0.4244	0.2715	0.3464	0.5442		40	0.5288	0.4785	0.4981	0.5214	0.7927	0.5578	0.5473	0.6561
0.338015	0.0955039	0.38529	0.0871819	0.55218	0.14799		41	0.2962	0.3853	0.2612	0.2451	0.3493	0.2469	0.2826	0.3634	0.5786	0.2663	0.3042	0.3812	0.2766	0.268	0.257	0.4816	0.4872	0.4373	0.2455	0.3468		41	0.5091	0.3636	0.2905	0.4553	0.2927	0.3791	0.3736	0.2645	0.4202	0.5043		41	0.5122	0.4837	0.5049	0.4652	0.9175	0.5645	0.4649	0.6679
0.343425	0.108642	0.38904	0.0985353	0.56133	0.136658		42	0.2908	0.3859	0.2997	0.2427	0.36	0.2362	0.2974	0.3499	0.6118	0.2753	0.3289	0.3329	0.2697	0.263	0.2702	0.4678	0.6124	0.381	0.2426	0.3503		42	0.5044	0.3369	0.3226	0.5532	0.3052	0.3882	0.3444	0.2657	0.3589	0.5109		42	0.5129	0.4702	0.4911	0.5077	0.8955	0.527	0.5035	0.6603
0.337905	0.103657	0.38167	0.088442	0.56649	0.143421		43	0.2977	0.4102	0.2799	0.2371	0.3733	0.2318	0.287	0.3376	0.5695	0.275	0.3021	0.3516	0.2905	0.2425	0.2697	0.474	0.5861	0.3761	0.2282	0.3382		43	0.4828	0.3493	0.3284	0.5385	0.309	0.3381	0.3313	0.2767	0.3764	0.4862		43	0.5305	0.4549	0.504	0.498	0.9226	0.5456	0.514	0.6341
0.331415	0.0967143	0.38727	0.100921	0.54171	0.0998972		44	0.3134	0.4028	0.2841	0.2252	0.3178	0.2167	0.2738	0.3388	0.5711	0.2816	0.3112	0.3858	0.2771	0.2458	0.2481	0.4259	0.5338	0.3626	0.2377	0.375		44	0.4719	0.3371	0.3266	0.5381	0.2927	0.3284	0.3752	0.2766	0.3649	0.5612		44	0.537	0.4887	0.5124	0.4791	0.7792	0.5479	0.495	0.606
0.326025	0.093652	0.36363	0.0748075	0.56376	0.117387		45	0.3311	0.36	0.3434	0.2379	0.3184	0.2249	0.2626	0.3479	0.5071	0.2914	0.296	0.3858	0.2525	0.2306	0.2251	0.4356	0.5636	0.3395	0.2235	0.3436		45	0.4181	0.3268	0.3314	0.4389	0.2849	0.345	0.369	0.2541	0.3604	0.5077		45	0.5394	0.4692	0.539	0.4623	0.8066	0.5429	0.5432	0.6835
0.323405	0.0978182	0.36058	0.0668458	0.55444	0.129061		46	0.3058	0.3226	0.3032	0.2294	0.3696	0.2116	0.2628	0.342	0.5866	0.273	0.2887	0.3499	0.268	0.2463	0.2359	0.4693	0.5125	0.2943	0.2533	0.3433		46	0.4965	0.3089	0.3269	0.4152	0.2997	0.344	0.3886	0.264	0.3845	0.3775		46	0.4961	0.4644	0.5222	0.4414	0.8074	0.5567	0.5339	0.7344
0.32309	0.0939862	0.37478	0.0779873	0.54408	0.100269		47	0.2973	0.41	0.3297	0.2426	0.304	0.2311	0.2678	0.3008	0.5347	0.2731	0.3416	0.3426	0.2747	0.2423	0.2405	0.4402	0.5494	0.3073	0.2144	0.3177		47	0.4001	0.3044	0.322	0.5306	0.3378	0.3519	0.3587	0.2941	0.3587	0.4895		47	0.5016	0.4814	0.4737	0.4986	0.7867	0.5413	0.5013	0.6437
0.31236	0.0898529	0.35813	0.0762573	0.54385	0.099943		48	0.2789	0.3502	0.3306	0.2418	0.3148	0.2363	0.2577	0.3118	0.5326	0.2678	0.3093	0.3409	0.2548	0.2195	0.2087	0.3949	0.5295	0.3368	0.2219	0.3084		48	0.3756	0.2896	0.3287	0.4991	0.3427	0.351	0.3234	0.2488	0.3499	0.4725		48	0.4974	0.4831	0.4872	0.4436	0.7643	0.5286	0.4805	0.6659
0.308295	0.0873791	0.34472	0.0591993	0.54797	0.103862		49	0.2602	0.3627	0.3004	0.2365	0.3111	0.2058	0.2556	0.3437	0.5277	0.2644	0.2754	0.3367	0.2601	0.2308	0.2276	0.4163	0.4908	0.2985	0.2231	0.3385		49	0.4274	0.3187	0.2896	0.4287	0.3128	0.3382	0.3472	0.2526	0.3243	0.4077		49	0.5047	0.4787	0.4744	0.4378	0.6781	0.54	0.4852	0.7362
0.327505	0.107964	0.36943	0.0751544	0.57148	0.10667		50	0.3105	0.3306	0.2832	0.2296	0.3322	0.2125	0.2978	0.3892	0.6424	0.2608	0.2944	0.3841	0.2535	0.2319	0.236	0.4875	0.4322	0.2772	0.2282	0.4363		50	0.4833	0.3376	0.2957	0.4221	0.3018	0.3579	0.3617	0.2525	0.4396	0.4421		50	0.518	0.5117	0.5228	0.4576	0.7813	0.556	0.6003	0.6608
0.329845	0.100818	0.37733	0.0833319	0.57455	0.111608		51	0.2951	0.3279	0.2652	0.232	0.3111	0.2132	0.3084	0.4404	0.5482	0.2721	0.3242	0.4608	0.2527	0.219	0.2564	0.4678	0.4914	0.2938	0.23	0.3872		51	0.4831	0.4316	0.2697	0.4118	0.2723	0.3745	0.4243	0.2496	0.4489	0.4075		51	0.5355	0.5084	0.6186	0.4188	0.7247	0.6135	0.5688	0.6192
0.33966	0.112889	0.34494	0.080002	0.58489	0.135409		52	0.2441	0.3366	0.2618	0.2429	0.2689	0.2044	0.3387	0.5449	0.5946	0.286	0.3312	0.5075	0.2776	0.2394	0.2873	0.4645	0.4586	0.3102	0.2463	0.3477		52	0.4571	0.3369	0.2439	0.3277	0.2471	0.4073	0.4288	0.2749	0.4277	0.298		52	0.5266	0.4891	0.7607	0.4462	0.6851	0.7372	0.699	0.538
0.35507	0.127299	0.32873	0.0701433	0.60176	0.175382		53	0.2438	0.3514	0.2458	0.2515	0.3007	0.2017	0.3435	0.5358	0.6782	0.3051	0.4183	0.5707	0.2881	0.2228	0.2842	0.4314	0.4817	0.3347	0.2739	0.3381		53	0.4435	0.3433	0.2497	0.29	0.2549	0.3955	0.377	0.2627	0.3922	0.2785		53	0.509	0.4732	0.9073	0.4508	0.7693	0.7557	0.6732	0.5277
0.373845	0.136124	0.32937	0.0830653	0.60889	0.174403		54	0.234	0.3458	0.2576	0.2497	0.2685	0.2236	0.3571	0.6307	0.5893	0.3575	0.5162	0.639	0.3022	0.2182	0.3194	0.483	0.4942	0.3542	0.3053	0.3314		54	0.433	0.3644	0.2404	0.2645	0.244	0.4308	0.4178	0.2426	0.3785	0.2777		54	0.5277	0.4719	0.8785	0.4481	0.7796	0.7422	0.7479	0.5425
0.407755	0.182048	0.32377	0.066292	0.58054	0.162623		55	0.2374	0.3493	0.2384	0.2378	0.2879	0.2225	0.3746	0.7064	0.6775	0.3631	0.5468	0.8398	0.3058	0.234	0.3366	0.6453	0.47	0.4139	0.3733	0.2947		55	0.4192	0.357	0.2393	0.2662	0.2581	0.3535	0.4038	0.2831	0.3816	0.2759		55	0.5155	0.4589	0.8383	0.474	0.6886	0.7463	0.7272	0.5059
0.454225	0.216617	0.32704	0.0720927	0.58502	0.143434		56	0.244	0.4252	0.274	0.2432	0.2856	0.2291	0.3607	0.8231	0.6831	0.4593	0.6321	0.8862	0.3371	0.2476	0.4525	0.8837	0.5061	0.3975	0.4254	0.289		56	0.3916	0.4132	0.2512	0.2849	0.2406	0.3566	0.4151	0.2676	0.3881	0.2615		56	0.5376	0.4751	0.8493	0.4706	0.6884	0.7194	0.6316	0.5794
0.48689	0.236729	0.3267	0.0686723	0.58037	0.146245		57	0.2582	0.5198	0.3035	0.2661	0.2631	0.2069	0.3734	0.8846	0.7573	0.4913	0.6988	0.9393	0.3695	0.2513	0.488	0.9306	0.5504	0.4166	0.4576	0.3115		57	0.4347	0.3686	0.2438	0.2849	0.2671	0.3438	0.4006	0.2678	0.3896	0.2661		57	0.5185	0.4688	0.8071	0.4646	0.6646	0.7527	0.7174	0.487
0.51764	0.233522	0.31425	0.0628236	0.5747	0.153264		58	0.2688	0.5253	0.3467	0.2965	0.2578	0.2129	0.4428	0.8857	0.8441	0.5424	0.6807	0.9495	0.4042	0.2432	0.5706	0.8979	0.6011	0.5212	0.5218	0.3396		58	0.4197	0.3269	0.2424	0.2698	0.2606	0.331	0.3932	0.2709	0.368	0.26		58	0.4983	0.4619	0.7907	0.4706	0.5902	0.8528	0.676	0.5005
0.560955	0.227796	0.32226	0.0680409	0.59564	0.140748		59	0.3352	0.553	0.3733	0.3653	0.2674	0.2457	0.505	0.9584	0.7955	0.5925	0.6947	1.0067	0.4691	0.2877	0.632	0.8743	0.7444	0.5417	0.5639	0.4133		59	0.4252	0.3273	0.2403	0.2876	0.2537	0.3362	0.4291	0.2654	0.3707	0.2871		59	0.512	0.4859	0.8466	0.5076	0.6118	0.837	0.6103	0.5874
0.6003	0.215311	0.32572	0.0765622	0.58053	0.135646		60	0.3892	0.5587	0.4355	0.3924	0.2999	0.262	0.583	0.9003	0.8669	0.6661	0.6989	1.0594	0.5547	0.3832	0.6297	0.9077	0.6772	0.5981	0.6743	0.4688		60	0.4619	0.3492	0.2449	0.264	0.2465	0.309	0.4346	0.2912	0.371	0.2849		60	0.5063	0.4645	0.8272	0.4725	0.5875	0.7873	0.567	0.6444
0.66356	0.237151	0.32271	0.0721862	0.59687	0.137178		61	0.4946	0.6556	0.5118	0.4124	0.2982	0.2499	0.6738	0.9013	0.9548	0.6733	0.7499	1.156	0.6196	0.4159	0.7841	1.0593	0.6683	0.6912	0.756	0.5452		61	0.4209	0.3868	0.2404	0.2735	0.2465	0.3231	0.4333	0.2752	0.3555	0.2719		61	0.5065	0.4533	0.8212	0.484	0.5674	0.8178	0.615	0.6786
0.689165	0.233481	0.32196	0.0726863	0.61247	0.164802		62	0.53	0.6189	0.5717	0.4187	0.3027	0.2567	0.6928	0.9141	1.026	0.7992	0.7708	1.1148	0.6288	0.4235	0.8467	0.9457	0.7263	0.8657	0.7641	0.5661		62	0.4384	0.3696	0.2383	0.2658	0.2423	0.3276	0.414	0.2875	0.3705	0.2656		62	0.5498	0.4783	0.9015	0.4461	0.5608	0.8811	0.6271	0.684
0.738015	0.210596	0.34851	0.0848847	0.62763	0.170849		63	0.5659	0.7232	0.5576	0.4672	0.4001	0.2741	0.8248	0.9122	0.9471	0.7874	0.8618	1.0163	0.7771	0.5625	0.9152	0.9911	0.8065	0.9635	0.79	0.6167		63	0.4887	0.3912	0.2395	0.2923	0.2706	0.3374	0.4264	0.3154	0.4473	0.2763		63	0.5015	0.4631	0.8598	0.4953	0.5315	0.8313	0.6869	0.8535
0.771035	0.200278	0.36557	0.110243	0.61883	0.152854		64	0.6262	0.7156	0.6611	0.5151	0.4306	0.292	0.8144	0.8871	0.9806	0.7333	0.8697	1.1074	0.7742	0.7313	0.9537	0.9896	0.8101	0.9077	0.9234	0.6976		64	0.576	0.4186	0.2373	0.2965	0.2551	0.3628	0.4169	0.3241	0.4933	0.2751		64	0.5151	0.4624	0.8685	0.4629	0.5398	0.7878	0.6574	0.8018
0.771135	0.199033	0.35539	0.122442	0.62213	0.154891		65	0.7117	0.7496	0.7283	0.4935	0.4398	0.3073	0.852	0.8595	0.9869	0.7361	0.8121	1.0811	0.7931	0.5748	0.87	1.044	0.7845	0.883	0.9881	0.7273		65	0.6492	0.3631	0.2399	0.285	0.2354	0.3566	0.4139	0.3035	0.4234	0.2839		65	0.521	0.4706	0.869	0.4983	0.5459	0.848	0.6027	0.8026
0.77764	0.204726	0.35953	0.113611	0.63042	0.181418		66	0.6899	0.726	0.6836	0.5774	0.4801	0.3434	0.8124	0.831	0.8659	0.7362	0.8856	1.3167	0.6923	0.6341	0.8018	1.0517	0.7573	0.9066	0.915	0.8458		66	0.6132	0.3716	0.2526	0.2814	0.2368	0.3398	0.4351	0.3085	0.4477	0.3086		66	0.4789	0.4624	0.9596	0.4716	0.5387	0.8922	0.6095	0.7607
0.816135	0.216288	0.3629	0.105873	0.63632	0.161629		67	0.6368	0.6826	0.6427	0.6363	0.5399	0.4828	0.9204	0.9291	0.8387	0.7563	0.9786	1.3283	0.6907	0.6117	0.8452	1.2063	0.7632	0.8651	0.9696	0.9984		67	0.5651	0.392	0.2628	0.2833	0.2355	0.3371	0.4481	0.3094	0.4795	0.3162		67	0.5097	0.4656	0.8619	0.4909	0.5651	0.915	0.6042	0.7813
0.817155	0.170608	0.36345	0.101128	0.66667	0.184172		68	0.691	0.7897	0.6186	0.6386	0.5335	0.6625	0.8932	1.0184	0.754	0.7412	1.0312	1.08	0.8077	0.5651	0.7826	1.11	0.8395	0.9561	0.9057	0.9245		68	0.5339	0.4018	0.2462	0.2732	0.2436	0.3482	0.484	0.3294	0.4512	0.323		68	0.4934	0.4384	0.8803	0.5022	0.6525	0.9523	0.6294	0.8855
0.820025	0.14128	0.37824	0.106979	0.66311	0.17939		69	0.7038	0.7647	0.5891	0.6609	0.5758	0.7725	0.8734	0.9827	0.7713	0.7244	0.895	0.9169	0.7549	0.7563	0.8537	1.1428	0.8424	0.9796	0.9778	0.8625		69	0.5512	0.3787	0.2478	0.2811	0.2474	0.4204	0.5115	0.3618	0.4597	0.3228		69	0.5213	0.4654	0.9165	0.4722	0.6407	0.9471	0.7116	0.7827
0.82656	0.135039	0.384	0.110333	0.64801	0.170384		70	0.6429	0.8149	0.6122	0.6745	0.6111	0.7752	1.0191	0.869	0.8439	0.8064	0.8625	0.8543	0.7152	0.7724	0.9674	1.0991	0.7882	0.9471	0.9864	0.8694		70	0.569	0.3731	0.2442	0.275	0.2596	0.4385	0.5271	0.3538	0.4414	0.3583		70	0.554	0.4445	0.8741	0.4503	0.6887	0.9192	0.6949	0.731
0.839045	0.15477	0.37984	0.108708	0.65949	0.197861		71	0.7346	0.8897	0.672	0.6784	0.6104	0.7363	1.1273	0.8184	0.835	0.7449	0.9954	1.0471	0.6952	0.6977	0.8304	1.1269	0.8448	1.04	0.8471	0.8093		71	0.4989	0.3921	0.2518	0.2723	0.2401	0.456	0.5574	0.3432	0.4458	0.3408		71	0.5503	0.4429	1.0164	0.451	0.6939	0.9457	0.6968	0.6493
0.83045	0.153415	0.38397	0.11897	0.66227	0.176243		72	0.8498	0.8872	0.6522	0.6365	0.5563	0.7762	1.0683	0.8198	0.8627	0.7472	0.8759	1.0286	0.7174	0.6844	0.6782	1.0616	0.8741	1.0953	0.8216	0.9157		72	0.5227	0.4212	0.2404	0.2678	0.242	0.4237	0.5975	0.345	0.4329	0.3465		72	0.5529	0.4526	0.8846	0.4854	0.6692	0.9741	0.6836	0.6774
0.843625	0.144957	0.38329	0.121164	0.66949	0.191709		73	0.9398	0.8572	0.6691	0.5935	0.6019	0.8439	0.9107	0.9798	0.8782	0.7103	0.9081	0.9439	0.7887	0.6885	0.7869	0.9892	0.812	1.1802	0.9695	0.8211		73	0.5188	0.4276	0.2414	0.2765	0.2306	0.4665	0.5887	0.3408	0.4245	0.3175		73	0.5508	0.4779	0.9668	0.4541	0.6743	0.9967	0.6699	0.7494
0.83769	0.164059	0.41154	0.131355	0.69755	0.259552		74	0.8453	0.9051	0.6568	0.5974	0.627	0.7862	0.8505	0.9113	0.8279	0.7791	0.9768	1.1973	0.7343	0.5917	0.8961	1.081	0.7676	1.0776	0.9083	0.7365		74	0.5691	0.4335	0.2483	0.2673	0.245	0.5073	0.605	0.4223	0.4723	0.3453		74	0.5433	0.4635	1.1362	0.4925	0.6316	1.1669	0.6683	0.7224
0.8247	0.126807	0.42	0.130338	0.66897	0.255281		75	0.8845	0.8397	0.7239	0.5668	0.6188	0.931	0.8298	0.9527	0.8063	0.8664	0.8474	1.0314	0.6933	0.6491	0.8084	1.0203	0.8319	0.9548	0.8733	0.7642		75	0.5182	0.4454	0.2536	0.2631	0.2493	0.5283	0.6197	0.4198	0.5129	0.3897		75	0.5156	0.4547	0.9852	0.4688	0.7003	1.2287	0.6415	0.6538
0.82881	0.130136	0.42303	0.13004	0.64916	0.208843		76	0.7668	0.8025	0.7091	0.5404	0.6719	0.9122	0.8902	0.9868	0.8123	0.8395	1.0088	0.995	0.6981	0.678	0.736	0.974	0.9771	0.9046	0.8651	0.8078		76	0.5326	0.4219	0.2592	0.251	0.2497	0.4944	0.5998	0.463	0.548	0.4107		76	0.5408	0.474	0.7959	0.4936	0.6587	1.141	0.6672	0.6836
0.79393	0.148044	0.44624	0.139458	0.65958	0.205912		77	0.7303	0.9168	0.6667	0.4669	0.6138	0.8101	0.742	0.7848	0.8946	0.919	0.9235	0.9708	0.7325	0.5299	0.7184	0.9304	0.9093	0.9617	0.9361	0.721		77	0.5346	0.4474	0.272	0.2785	0.2857	0.5986	0.6123	0.4562	0.6079	0.3692		77	0.5517	0.4766	0.8181	0.483	0.651	1.1307	0.7416	0.6641
0.78983	0.121248	0.4554	0.139337	0.61924	0.120376		78	0.8256	0.7845	0.6367	0.4813	0.668	0.8689	0.7838	0.7988	0.909	0.8407	0.8597	0.8444	0.7595	0.5903	0.8065	0.9652	0.9248	0.8514	0.8977	0.6998		78	0.5165	0.4085	0.2796	0.2981	0.3276	0.6392	0.5301	0.4964	0.6789	0.3791		78	0.6364	0.4781	0.6889	0.4679	0.6578	0.8308	0.7026	0.6196
0.772615	0.129377	0.45592	0.152394	0.59284	0.113366		79	0.7864	0.7604	0.5936	0.4996	0.599	0.8498	0.7373	0.8404	0.9753	0.7455	0.7695	0.9506	0.7552	0.5873	0.9025	0.9424	0.8048	0.7737	0.8723	0.7067		79	0.5275	0.431	0.2867	0.2849	0.2727	0.5845	0.5454	0.4578	0.7491	0.4196		79	0.6337	0.4467	0.6178	0.4724	0.6617	0.7602	0.717	0.5661
0.76027	0.129679	0.48421	0.166238	0.61276	0.127768		80	0.6305	0.7418	0.6228	0.5049	0.6665	0.7479	0.6868	0.8496	0.8335	0.7789	0.9083	1.0721	0.7721	0.619	0.7883	0.9667	0.8123	0.7329	0.7729	0.6976		80	0.6024	0.4379	0.3084	0.2945	0.3007	0.6277	0.5164	0.4479	0.8144	0.4918		80	0.6819	0.4844	0.6131	0.4709	0.7523	0.7859	0.7218	0.4764
0.78688	0.12929	0.49994	0.175757	0.62087	0.12765		81	0.808	0.8435	0.7322	0.4785	0.586	0.8113	0.7493	0.8945	0.9622	0.9028	0.8432	0.9303	0.7785	0.55	0.8122	0.8473	0.9234	0.778	0.8324	0.674		81	0.5524	0.4146	0.3107	0.2612	0.3373	0.7332	0.5597	0.5372	0.7988	0.4943		81	0.7474	0.4501	0.6924	0.5047	0.712	0.7243	0.7471	0.4853
0.783825	0.125226	0.52912	0.181083	0.61984	0.137793		82	0.8838	0.8335	0.6698	0.5243	0.6328	0.794	0.7108	0.863	0.9445	0.8472	0.723	1.0542	0.8094	0.5638	0.8618	0.8118	0.8094	0.8161	0.8135	0.7098		82	0.5723	0.4746	0.3368	0.2786	0.345	0.6571	0.5874	0.5968	0.8922	0.5504		82	0.7969	0.4657	0.6499	0.4681	0.7138	0.7062	0.777	0.4863
0.787535	0.121725	0.50752	0.162433	0.6568	0.173565		83	0.8515	0.889	0.6425	0.5321	0.6663	0.697	0.689	0.8891	0.9398	0.6985	0.778	0.9526	0.8838	0.6126	0.8253	0.9422	0.8123	0.7613	0.9014	0.7864		83	0.5848	0.4382	0.3518	0.2919	0.3183	0.5932	0.6012	0.6006	0.8151	0.4801		83	0.8225	0.4527	0.7479	0.48	0.8607	0.7486	0.8318	0.5597
0.840905	0.134145	0.55543	0.188784	0.63143	0.18321		84	0.8931	0.9037	0.7327	0.5684	0.6482	0.7231	0.7868	0.9214	1.024	0.769	0.8498	1.1257	0.9529	0.666	0.8159	0.9057	0.8259	0.8241	0.957	0.9247		84	0.6833	0.4534	0.3931	0.2748	0.3552	0.7569	0.6149	0.6419	0.8647	0.5161		84	0.961	0.4753	0.6119	0.4705	0.8125	0.6346	0.7844	0.4399
0.7959	0.140146	0.55234	0.170812	0.6305	0.182612		85	0.662	0.8512	0.6849	0.5646	0.7272	0.6637	0.7485	0.9478	1.055	0.7374	0.8599	1.034	0.8119	0.648	0.8007	0.8509	0.695	0.6755	0.8784	1.0214		85	0.6337	0.4496	0.4067	0.3116	0.3679	0.7949	0.6657	0.6559	0.7619	0.4755		85	0.8453	0.4507	0.6676	0.4922	0.761	0.7253	0.8583	0.3984
0.789555	0.0977421	0.57824	0.186506	0.6237	0.169891		86	0.752	0.7637	0.7163	0.6128	0.7471	0.666	0.7204	0.9112	0.9384	0.7685	0.8317	0.926	0.8158	0.6869	0.7111	0.8226	0.7479	0.791	0.8918	0.9699		86	0.6259	0.4614	0.4541	0.3055	0.374	0.7318	0.6198	0.6701	0.9408	0.599		86	0.8087	0.4607	0.6777	0.4717	0.7478	0.6756	0.9065	0.4374
0.814565	0.0940767	0.58395	0.185038	0.65089	0.202036		87	0.7783	0.8308	0.7592	0.6118	0.755	0.7402	0.8219	0.8727	1.0482	0.7617	0.8511	0.8852	0.8671	0.7166	0.7639	0.8236	0.811	0.7651	0.9809	0.847		87	0.6268	0.4498	0.4434	0.2936	0.3812	0.7623	0.6156	0.7415	0.8667	0.6586		87	0.8049	0.4585	0.7289	0.4803	0.7684	0.8019	1.0118	0.4599
0.82099	0.105239	0.58916	0.157696	0.61953	0.17759		88	0.7419	0.9092	0.8002	0.6419	0.7411	0.7236	0.7568	0.8463	1.0091	0.8271	0.8695	0.9068	0.8793	0.6058	0.8194	0.7868	0.8192	0.8035	1.0151	0.9172		88	0.705	0.513	0.4467	0.3056	0.4254	0.6609	0.6413	0.6886	0.807	0.6981		88	0.8109	0.4464	0.6187	0.4744	0.7886	0.7895	0.8282	0.4049
0.831145	0.116273	0.58943	0.154125	0.61511	0.173603		89	0.7679	0.8222	0.8131	0.6504	0.7401	0.6452	0.8398	1.0032	0.9585	0.909	0.8098	1.0087	0.86	0.6672	0.7558	0.7173	0.8262	0.8654	0.9916	0.9715		89	0.6871	0.5161	0.4537	0.3074	0.4301	0.6502	0.6487	0.6806	0.7892	0.7312		89	0.8816	0.4557	0.6427	0.4738	0.8015	0.7036	0.7725	0.4206
0.82196	0.139518	0.60228	0.184539	0.63788	0.185827		90	0.8192	0.8923	0.6465	0.6978	0.5977	0.645	0.9139	1.0257	1.1106	0.8366	0.7039	0.9185	0.8675	0.6601	0.8414	0.8028	0.7743	0.8211	1.0434	0.8209		90	0.7585	0.4547	0.4118	0.3353	0.3826	0.8196	0.7594	0.6945	0.7462	0.6602		90	0.8615	0.4747	0.59	0.533	0.7239	0.8318	0.91	0.3904
0.815715	0.124615	0.63685	0.189716	0.63313	0.182637		91	0.8853	0.7015	0.7553	0.7205	0.7345	0.6935	0.7913	0.8905	0.8782	0.834	0.7675	0.9412	0.9069	0.7873	0.7544	0.9133	0.7827	0.571	1.1775	0.8279		91	0.7485	0.5352	0.4195	0.3342	0.5204	0.8481	0.6462	0.624	0.9362	0.7562		91	0.9027	0.4721	0.6241	0.5001	0.8018	0.7159	0.8539	0.3929
0.8084	0.119678	0.60966	0.166041	0.63072	0.192209		92	0.819	0.704	0.7157	0.7184	0.8351	0.6281	0.6956	0.8927	1.0563	0.8954	0.9376	0.9387	0.8985	0.7028	0.6851	0.7928	0.8103	0.6623	0.9882	0.7914		92	0.6841	0.5149	0.4211	0.326	0.4969	0.7699	0.6824	0.6524	0.8687	0.6802		92	0.8195	0.4724	0.6124	0.4808	0.8148	0.7	0.9743	0.4259
0.815225	0.119861	0.61868	0.15235	0.6346	0.208886		93	0.6862	0.8029	0.7951	0.7911	0.8763	0.6862	0.8182	0.8361	1.1856	0.7927	0.8193	0.905	1.0047	0.6583	0.7178	0.8323	0.7125	0.7713	0.8596	0.7533		93	0.6778	0.5801	0.4508	0.36	0.5165	0.7466	0.5924	0.6572	0.8805	0.7249		93	0.7971	0.4772	0.6851	0.4456	0.8882	0.7339	0.957	0.4073
0.829995	0.131721	0.60314	0.152171	0.62868	0.171516		94	0.7987	0.8629	0.8419	0.769	0.7659	0.6422	0.8793	0.957	1.2152	0.8114	0.7639	0.7919	1.0242	0.656	0.7667	0.8404	0.7535	0.7606	0.9673	0.7319		94	0.6717	0.5299	0.5564	0.3305	0.4718	0.6463	0.636	0.6842	0.9113	0.5933		94	0.736	0.4898	0.6381	0.5407	0.951	0.7264	0.7789	0.4565
0.82148	0.104883	0.6226	0.156502	0.63366	0.189221		95	0.7392	0.7294	0.859	0.6961	0.7116	0.6558	0.8907	0.829	1.1167	0.8932	0.7964	0.7912	0.9184	0.7418	0.8798	0.8584	0.8074	0.855	0.9209	0.7396		95	0.6537	0.4681	0.4846	0.3625	0.574	0.6652	0.6741	0.7156	0.9143	0.7139		95	0.8127	0.4528	0.6277	0.5041	0.9068	0.6877	0.8977	0.4457
0.807615	0.110461	0.65039	0.163448	0.61473	0.165488		96	0.6965	0.7872	0.8699	0.7099	0.7567	0.5602	0.8741	0.8084	1.0604	0.8836	0.788	0.8047	0.9548	0.7205	0.8616	0.8117	0.7838	0.6817	0.9439	0.7947		96	0.6719	0.5255	0.5537	0.3474	0.5426	0.7602	0.7108	0.6873	0.933	0.7715		96	0.7527	0.4817	0.6482	0.5228	0.8318	0.7033	0.8373	0.417
0.821745	0.140718	0.66545	0.158982	0.61182	0.170084		97	0.7317	0.8153	0.7444	0.7198	0.6423	0.5189	0.9849	0.8081	1.0686	0.8378	0.7724	0.9968	0.908	0.7664	0.7979	0.7574	0.7792	0.7418	1.0629	0.9803		97	0.7237	0.5644	0.6637	0.3614	0.4995	0.7375	0.7522	0.6518	0.93	0.7703		97	0.8306	0.48	0.6357	0.4992	0.8355	0.6867	0.7982	0.401
0.780155	0.133193	0.63367	0.145492	0.61005	0.16565		98	0.704	0.711	0.6384	0.714	0.5605	0.6679	0.9014	0.8589	1.0574	0.8017	0.6296	0.7608	0.8238	0.7427	0.7071	0.9091	0.7584	0.7098	1.0587	0.8879		98	0.713	0.5559	0.4796	0.3384	0.5723	0.7355	0.6682	0.6976	0.7963	0.7799		98	0.8507	0.4747	0.6441	0.5237	0.7496	0.7651	0.765	0.3913
0.817075	0.102065	0.65571	0.174052	0.60374	0.145294		99	0.791	0.8762	0.6735	0.7439	0.6889	0.762	0.9684	0.908	1.0095	0.8215	0.738	0.8128	0.9155	0.6753	0.8914	0.7999	0.8458	0.6792	0.9501	0.7906		99	0.6078	0.5873	0.4755	0.3253	0.6203	0.725	0.6772	0.772	0.8965	0.8702		99	0.7554	0.4862	0.6282	0.5081	0.7948	0.6964	0.7223	0.4037
0.79547	0.0931408	0.6605	0.178376	0.61056	0.151428		100	0.7694	0.7823	0.7373	0.6874	0.7684	0.589	0.8269	0.7259	1.0105	0.8268	0.7515	0.8906	0.8673	0.7419	0.9357	0.7971	0.7773	0.7168	0.87	0.8373		100	0.6123	0.5237	0.5333	0.3664	0.5411	0.708	0.6894	0.8221	0.9158	0.8929		100	0.7725	0.4815	0.6829	0.4917	0.809	0.5967	0.7681	0.4152
0.78695	0.120252	0.63275	0.153872	0.62891	0.166279		101	0.732	0.6666	0.742	0.6976	0.6794	0.6659	0.8367	0.7682	1.2074	0.7548	0.7401	0.8333	0.889	0.7607	0.8154	0.7977	0.8251	0.6846	0.891	0.7515		101	0.6477	0.5141	0.5364	0.3651	0.5025	0.7187	0.6382	0.784	0.8716	0.7492		101	0.7355	0.5033	0.6201	0.5031	0.8612	0.6897	0.8678	0.4234
0.78042	0.122133	0.6507	0.164931	0.61922	0.189657		102	0.672	0.6944	0.6137	0.7301	0.716	0.6096	0.9005	0.7852	1.1149	0.9504	0.7512	0.8248	0.7916	0.8019	0.7388	0.7438	0.7378	0.6972	0.9541	0.7804		102	0.701	0.5418	0.5176	0.3676	0.5667	0.6993	0.6646	0.8368	0.9476	0.664		102	0.7968	0.5118	0.6566	0.4598	0.9292	0.6491	0.847	0.4065
0.814445	0.135663	0.6757	0.187044	0.60415	0.164413		103	0.6083	0.6891	0.7383	0.7545	0.877	0.617	0.8779	0.8474	1.1901	0.8161	0.7226	1.0173	0.8529	0.8708	0.6968	0.917	0.7831	0.7136	0.8688	0.8303		103	0.7407	0.5017	0.6563	0.3463	0.4891	0.8048	0.7092	0.8709	0.9599	0.6781		103	0.8294	0.4752	0.651	0.488	0.7591	0.7162	0.7607	0.4092
0.79614	0.1216	0.63654	0.170771	0.61172	0.171342		104	0.6044	0.6744	0.7749	0.7524	0.7694	0.678	0.8176	0.8214	1.0549	0.8356	0.7407	0.9505	0.8014	0.6999	0.6647	0.8893	0.754	0.711	0.8773	1.051		104	0.6552	0.4729	0.5862	0.3533	0.5109	0.7382	0.6657	0.7091	0.9784	0.6955		104	0.8296	0.4432	0.6249	0.51	0.7104	0.6624	0.8561	0.3968
0.82153	0.113464	0.65168	0.182461	0.60904	0.173445		105	0.6596	0.7955	0.8702	0.9338	0.8069	0.6588	0.8918	0.8228	0.9455	0.8436	0.7988	0.7794	0.8616	0.6082	0.6552	0.8763	0.8058	0.79	1.0011	1.0257		105	0.6248	0.6071	0.5823	0.3718	0.4692	0.6927	0.6811	0.8105	1.0421	0.6352		105	0.8851	0.4471	0.622	0.5059	0.6424	0.6825	0.781	0.3986
0.830175	0.118223	0.6615	0.164745	0.61243	0.156008		106	0.7118	0.8373	0.7687	0.7997	0.7412	0.6482	1.0363	0.8377	1.0269	0.8406	0.8067	0.8232	0.8294	0.7449	0.6847	0.9278	0.7966	0.7475	0.892	1.1023		106	0.6844	0.5278	0.5926	0.4433	0.5157	0.7127	0.6443	0.8401	1.004	0.6501		106	0.8655	0.4358	0.6403	0.5193	0.6951	0.635	0.7252	0.4444
0.826925	0.12042	0.65306	0.185748	0.60349	0.139626		107	0.691	0.8218	0.7574	0.7899	0.8856	0.6415	0.9257	0.8212	1.041	0.7911	0.8116	0.732	0.8963	0.7199	0.7413	1.0097	0.8047	0.731	0.816	1.1098		107	0.6659	0.517	0.503	0.4306	0.4352	0.6728	0.7159	0.8992	0.9747	0.7163		107	0.8034	0.4719	0.6248	0.5084	0.6879	0.6952	0.7259	0.4073
0.82276	0.123254	0.63082	0.160453	0.60892	0.149682		108	0.683	0.8134	0.7611	0.7782	0.8156	0.6112	0.8185	0.8223	1.1676	0.7586	0.812	0.9234	0.8894	0.7139	0.7916	0.9367	0.8083	0.6832	0.8607	1.0065		108	0.5887	0.5226	0.5278	0.3918	0.5	0.8167	0.6293	0.8708	0.8338	0.6267		108	0.7978	0.4636	0.6425	0.4779	0.6675	0.6576	0.8477	0.4266
0.799915	0.112707	0.65359	0.152959	0.59631	0.155244		109	0.6507	0.825	0.839	0.6602	0.8222	0.6023	0.9155	0.693	0.955	0.8106	0.7431	0.982	0.8955	0.7314	0.8053	0.8278	0.732	0.6841	0.8257	0.9979		109	0.5893	0.5489	0.5775	0.4667	0.4955	0.8382	0.5896	0.8549	0.8746	0.7007		109	0.9179	0.46	0.6189	0.4791	0.6581	0.6909	0.6681	0.4183
0.80336	0.114883	0.68307	0.158402	0.60158	0.15684		110	0.5992	0.7816	0.7736	0.7038	0.7338	0.6164	0.8629	0.8588	0.9643	0.8513	0.7375	0.9335	0.8383	0.7578	0.7436	0.8134	0.737	0.8152	0.8439	1.1013		110	0.6704	0.5605	0.5418	0.4721	0.5399	0.8828	0.6489	0.8539	0.9081	0.7523		110	0.9138	0.4733	0.6215	0.4951	0.6095	0.7458	0.606	0.4109
0.81265	0.11743	0.6431	0.116189	0.60277	0.148616		111	0.7275	0.7151	0.8195	0.7742	0.7783	0.6431	0.7356	0.8193	1.0831	0.9449	0.8485	0.7806	0.8328	0.748	0.7179	0.7758	0.6996	0.7818	0.9619	1.0655		111	0.6778	0.5645	0.5517	0.4847	0.5183	0.7366	0.6509	0.7976	0.8224	0.6265		111	0.8048	0.4884	0.6104	0.4824	0.594	0.7911	0.7546	0.4238
0.80162	0.116565	0.65319	0.147072	0.59082	0.129799		112	0.8484	0.7594	0.7873	0.7904	0.8402	0.5686	0.7067	0.756	0.9339	0.8404	0.7095	0.8906	0.9845	0.6503	0.6732	0.7926	0.8276	0.7011	0.986	0.9857		112	0.7314	0.5013	0.5819	0.4167	0.4968	0.6926	0.703	0.7465	0.8764	0.7853		112	0.7985	0.4637	0.6508	0.4915	0.6285	0.7045	0.6861	0.4519
0.78781	0.124944	0.64306	0.125719	0.59241	0.122104		113	0.6822	0.837	0.7794	0.7562	0.6729	0.5762	0.7264	0.7283	0.962	0.8365	0.7048	0.7852	0.905	0.6257	0.7284	0.9079	0.7917	0.7132	0.9595	1.0777		113	0.6288	0.457	0.5623	0.4752	0.6021	0.7105	0.6214	0.8001	0.7956	0.7776		113	0.756	0.485	0.6517	0.512	0.604	0.669	0.7348	0.4364
0.78737	0.114354	0.65239	0.101593	0.59146	0.143607		114	0.8175	0.8154	0.8446	0.6411	0.6975	0.5953	0.8331	0.7568	1.0197	0.9419	0.6892	0.7683	0.849	0.7287	0.6763	0.8179	0.7325	0.7009	0.7996	1.0221		114	0.6477	0.5105	0.5856	0.5243	0.6022	0.6645	0.6703	0.7954	0.8093	0.7141		114	0.8274	0.4722	0.6413	0.5135	0.5734	0.683	0.7368	0.3945
0.805745	0.118322	0.68844	0.119856	0.59008	0.14087		115	0.8447	0.8835	0.7781	0.6827	0.7083	0.5679	0.7897	0.798	0.931	0.8459	0.8191	0.835	0.8652	0.6765	0.7039	0.877	0.7129	0.7361	0.9651	1.0943		115	0.6836	0.5232	0.6665	0.4694	0.6718	0.7334	0.756	0.76	0.8872	0.7333		115	0.8118	0.4921	0.6242	0.5376	0.6298	0.6727	0.7438	0.4104
0.785225	0.132481	0.68201	0.146394	0.59408	0.147362		116	0.816	0.7647	0.8403	0.6329	0.7053	0.5721	0.8476	0.7336	0.9642	0.8304	0.681	0.8263	0.8425	0.6451	0.6205	0.899	0.7292	0.7116	0.9261	1.1161		116	0.6128	0.5215	0.608	0.4753	0.6883	0.6958	0.6788	0.8515	0.9718	0.7163		116	0.8044	0.4836	0.6254	0.5726	0.5489	0.7475	0.772	0.3979
0.77177	0.1197	0.66921	0.150689	0.59646	0.134211		117	0.7157	0.8146	0.8671	0.726	0.8182	0.6403	0.725	0.7199	0.958	0.8178	0.6999	0.796	0.9176	0.6613	0.6881	0.8434	0.6617	0.4988	0.8831	0.9829		117	0.6138	0.4339	0.5338	0.5426	0.6254	0.7116	0.745	0.8486	0.931	0.7064		117	0.7695	0.4702	0.6482	0.5086	0.6584	0.6782	0.7498	0.4305
0.78674	0.110506	0.6337	0.111199	0.58775	0.158474		118	0.6767	0.8479	0.7411	0.7069	0.7316	0.6183	0.7924	0.7849	0.958	0.9993	0.7806	0.8265	0.8375	0.5962	0.7522	0.8504	0.72	0.6693	0.9013	0.9437		118	0.6041	0.4784	0.5158	0.4949	0.6033	0.6956	0.7111	0.8023	0.7314	0.7001		118	0.8075	0.4402	0.6078	0.5586	0.6326	0.6656	0.8261	0.3889
0.77479	0.102016	0.65154	0.106289	0.58189	0.130001		119	0.8444	0.918	0.7329	0.7059	0.7079	0.5541	0.7236	0.7873	0.9419	0.9258	0.7059	0.8005	0.7869	0.5852	0.7145	0.7896	0.7561	0.8141	0.8355	0.8657		119	0.627	0.4995	0.5838	0.5065	0.6527	0.7084	0.6851	0.7499	0.8472	0.6553		119	0.7151	0.4809	0.6439	0.523	0.5788	0.685	0.7536	0.3805
0.79176	0.134129	0.64307	0.130674	0.5854	0.122598		120	0.7507	0.8468	0.7491	0.6471	0.8286	0.5915	0.703	0.6845	1.0506	0.9072	0.906	0.7657	1.0173	0.5811	0.674	0.784	0.8132	0.6886	0.9715	0.8747		120	0.6343	0.4411	0.5466	0.487	0.5914	0.7135	0.6904	0.8099	0.8446	0.6719		120	0.7011	0.507	0.632	0.5585	0.5983	0.6933	0.7684	0.4138
0.795255	0.120148	0.62293	0.0938159	0.57303	0.134686		121	0.715	0.818	0.7051	0.7038	0.7044	0.576	0.7303	0.7846	0.929	0.7848	0.7776	0.9506	0.9609	0.6574	0.7716	0.8472	0.7964	0.7275	1.0905	0.8744		121	0.5944	0.5378	0.5837	0.5074	0.5564	0.733	0.6588	0.795	0.6973	0.5655		121	0.6494	0.472	0.6537	0.5384	0.5989	0.7565	0.7269	0.3807
0.78001	0.107932	0.58258	0.0902283	0.57749	0.143619		122	0.6426	0.723	0.7783	0.6703	0.6758	0.6305	0.8051	0.7649	0.917	0.7984	0.7809	0.8262	0.9535	0.6132	0.7975	0.7412	0.7905	0.8083	1.0391	0.8439		122	0.5573	0.4598	0.5846	0.5064	0.5133	0.6012	0.5828	0.7715	0.6853	0.5636		122	0.6125	0.4972	0.654	0.5697	0.6308	0.7228	0.8094	0.3639
0.803315	0.12624	0.62995	0.123528	0.57416	0.131315		123	0.5615	0.8596	0.7328	0.6645	0.7109	0.6792	0.7934	0.7743	0.9817	0.962	1.0363	0.8506	0.9335	0.6303	0.7894	0.7857	0.7852	0.717	0.8878	0.9306		123	0.6612	0.4031	0.5677	0.4824	0.716	0.6323	0.5743	0.791	0.7502	0.7213		123	0.6202	0.4884	0.6641	0.5311	0.5831	0.6711	0.8056	0.403
0.77124	0.10573	0.62943	0.0996644	0.56974	0.12928		124	0.6175	0.7353	0.7703	0.7477	0.767	0.5743	0.7532	0.8395	0.9337	0.9173	0.8181	0.7471	0.8973	0.5685	0.6866	0.7565	0.8001	0.7579	0.8039	0.933		124	0.6298	0.446	0.6182	0.494	0.5836	0.7064	0.6343	0.7331	0.7098	0.7391		124	0.5954	0.4673	0.6279	0.516	0.5582	0.7361	0.8009	0.4119
0.76056	0.110035	0.63044	0.107477	0.57142	0.126363		125	0.6186	0.8576	0.7522	0.7557	0.5692	0.6479	0.8135	0.7392	0.9932	0.7262	0.7429	0.7834	0.8764	0.5475	0.6905	0.8393	0.8427	0.7655	0.7669	0.8828		125	0.6821	0.493	0.5298	0.5576	0.6415	0.6378	0.5458	0.699	0.8636	0.6542		125	0.6556	0.4763	0.6865	0.5655	0.5365	0.7466	0.6792	0.3912
0.775785	0.12618	0.61505	0.0793202	0.5912	0.157169		126	0.6174	0.8607	0.7643	0.686	0.6057	0.6283	0.7795	0.8069	0.9395	0.7839	0.8264	0.6942	0.9376	0.5487	0.6725	0.9972	0.9367	0.7853	0.7655	0.8794		126	0.655	0.4982	0.4958	0.6723	0.5548	0.659	0.5787	0.7214	0.6897	0.6256		126	0.6603	0.4765	0.6468	0.5691	0.5233	0.8086	0.8629	0.3906
0.764495	0.123933	0.64016	0.0790385	0.59444	0.171245		127	0.7356	0.7959	0.7043	0.6771	0.6822	0.6061	0.826	0.7192	1.0344	0.7598	0.6754	0.805	1.0142	0.5791	0.5748	0.9065	0.8163	0.789	0.8124	0.7766		127	0.6123	0.5058	0.5559	0.6662	0.6252	0.6794	0.6065	0.6986	0.7915	0.6602		127	0.5995	0.4801	0.6868	0.6269	0.547	0.7325	0.9557	0.3902
0.74136	0.10992	0.61931	0.0936986	0.56505	0.139077		128	0.522	0.8181	0.681	0.7467	0.6972	0.5983	0.8542	0.6544	0.9047	0.7328	0.681	0.8347	0.9442	0.6203	0.6294	0.8118	0.7418	0.7031	0.8027	0.8488		128	0.6164	0.5015	0.5613	0.5659	0.6903	0.6021	0.5604	0.727	0.8068	0.5614		128	0.5894	0.4878	0.6505	0.6169	0.5289	0.7198	0.7887	0.3701
0.76542	0.122408	0.6277	0.100284	0.59227	0.138763		129	0.5485	0.7266	0.8012	0.8705	0.6891	0.5557	0.8617	0.6748	0.9922	0.7668	0.7136	0.8405	0.7961	0.6138	0.6333	0.8871	0.8531	0.7551	0.7831	0.9456		129	0.6404	0.465	0.5217	0.6193	0.6273	0.6724	0.5748	0.672	0.8412	0.6429		129	0.6131	0.508	0.6485	0.6392	0.5625	0.7386	0.8387	0.4056
0.74849	0.104288	0.60717	0.0896028	0.57327	0.126482		130	0.667	0.6365	0.7229	0.8109	0.7542	0.6002	0.7757	0.6983	0.9414	0.7578	0.7999	0.7431	0.788	0.5351	0.6661	0.925	0.8581	0.712	0.6993	0.8783		130	0.6583	0.411	0.5609	0.742	0.5934	0.6485	0.6776	0.5554	0.6373	0.5873		130	0.6213	0.5013	0.6164	0.6435	0.5333	0.707	0.7877	0.3887
0.72449	0.128619	0.6627	0.108738	0.58806	0.144361		131	0.6795	0.6792	0.6793	0.7879	0.5595	0.616	0.7287	0.6561	1.041	0.701	0.7803	0.7194	0.7529	0.5141	0.6233	0.8807	0.8775	0.6547	0.6334	0.9253		131	0.705	0.5156	0.6295	0.7813	0.5462	0.7153	0.6539	0.6698	0.8597	0.5507		131	0.6169	0.496	0.6154	0.6445	0.5224	0.728	0.8875	0.4157
0.75298	0.116873	0.63936	0.0794089	0.5688	0.127032		132	0.5212	0.7005	0.7274	0.8136	0.8181	0.6754	0.6954	0.641	0.9766	0.885	0.8649	0.6553	0.822	0.6208	0.7293	0.9029	0.8152	0.5904	0.7658	0.8388		132	0.6204	0.4609	0.5999	0.6992	0.6292	0.6888	0.6322	0.649	0.7685	0.6455		132	0.5585	0.5222	0.6679	0.5671	0.5126	0.8116	0.6796	0.4378
0.789285	0.113365	0.66253	0.133535	0.59477	0.156629		133	0.5636	0.7746	0.8005	0.7864	0.9834	0.6469	0.6419	0.7252	0.921	0.9007	0.9676	0.8317	0.9224	0.744	0.7349	0.8352	0.8496	0.6936	0.7049	0.7576		133	0.6371	0.468	0.5355	0.6425	0.5588	0.6672	0.683	0.8202	0.9247	0.6883		133	0.5491	0.4696	0.7209	0.6813	0.5303	0.7938	0.8557	0.4319
0.753085	0.102741	0.66123	0.100682	0.58688	0.149291		134	0.557	0.8358	0.7443	0.7731	0.7541	0.6259	0.6923	0.6435	0.9526	0.9409	0.7405	0.7574	0.9061	0.6909	0.7089	0.7562	0.7483	0.6441	0.7561	0.8337		134	0.6697	0.5028	0.5971	0.6704	0.5861	0.6253	0.6561	0.7179	0.8849	0.702		134	0.5115	0.4696	0.7354	0.6564	0.5339	0.7497	0.851	0.4532
0.773865	0.108637	0.66903	0.114168	0.57709	0.147619		135	0.6414	0.9133	0.6938	0.8645	0.7484	0.7104	0.7085	0.6418	0.9849	0.8559	0.6988	0.8569	0.9125	0.6576	0.664	0.876	0.8778	0.7478	0.6485	0.7745		135	0.6387	0.5439	0.4796	0.6965	0.6236	0.5778	0.7498	0.7718	0.8007	0.8079		135	0.5203	0.4917	0.7187	0.6675	0.5241	0.8298	0.7313	0.4077
0.849135	0.130375	0.68393	0.107955	0.60867	0.158897		136	0.8027	1.0569	0.7602	0.8328	0.7497	0.6359	0.8512	0.7487	1.0435	0.9376	0.7601	0.8221	1.0681	0.804	0.6114	1.0124	0.8842	0.8204	0.8158	0.965		136	0.6246	0.4907	0.6054	0.7717	0.6131	0.6121	0.7472	0.8203	0.7805	0.7737		136	0.5572	0.4887	0.7342	0.6607	0.5903	0.8911	0.8055	0.4421
0.811035	0.122897	0.64328	0.092613	0.62587	0.188707		137	0.601	0.9715	0.8003	0.828	0.7967	0.6198	0.7861	0.7403	1.0496	0.94	0.8254	0.771	0.8904	0.7606	0.568	0.878	0.8519	0.7428	0.8521	0.9472		137	0.7299	0.5266	0.5308	0.6611	0.6541	0.5219	0.7755	0.7295	0.6917	0.6117		137	0.538	0.4684	0.8243	0.584	0.5785	0.914	0.9261	0.4579
0.843975	0.115168	0.70177	0.0973158	0.60799	0.175794		138	0.6763	1.0066	0.8779	0.9868	0.7509	0.6919	0.7468	0.7646	0.9863	0.907	0.8558	0.8514	0.9667	0.7791	0.6651	0.9678	0.9238	0.7474	0.7615	0.9658		138	0.6473	0.5133	0.6231	0.8357	0.765	0.6228	0.7455	0.7571	0.7226	0.7853		138	0.4949	0.4587	0.8207	0.632	0.5923	0.9814	0.6708	0.4919
0.829955	0.113028	0.71272	0.0974478	0.6084	0.175831		139	0.6346	0.8836	0.7845	0.877	0.8911	0.7865	0.9114	0.642	0.9681	0.9511	0.9139	0.7634	0.8427	0.7727	0.666	1.0239	0.9294	0.7299	0.7236	0.9037		139	0.6563	0.5403	0.6818	0.8713	0.7337	0.6468	0.6621	0.7691	0.838	0.7278		139	0.5375	0.48	0.7317	0.6729	0.6	0.9499	0.7942	0.4445
0.827715	0.111903	0.70893	0.0971611	0.59621	0.176557		140	0.5707	1.0222	0.8612	0.8158	0.8602	0.7682	0.8443	0.8013	0.9521	0.9393	0.832	0.7834	0.8623	0.7811	0.6035	0.9993	0.8878	0.7656	0.7499	0.8541		140	0.6947	0.5758	0.6187	0.8557	0.6514	0.6462	0.6425	0.8024	0.7975	0.8044		140	0.5183	0.4595	0.7386	0.672	0.5685	0.9347	0.774	0.4606
0.840065	0.118789	0.70368	0.100481	0.61729	0.170122		141	0.6401	1.0367	0.998	0.8349	0.7591	0.7622	0.852	0.6877	0.9747	0.9876	0.7217	0.7696	0.8835	0.8051	0.6845	0.9161	0.9971	0.8677	0.7426	0.8804		141	0.7484	0.5514	0.6395	0.8554	0.5899	0.6803	0.6578	0.844	0.7097	0.7604		141	0.5305	0.4661	0.7834	0.6139	0.5862	0.9322	0.822	0.5248
0.847125	0.12364	0.71921	0.118902	0.62775	0.174418		142	0.6458	0.9943	1.0445	0.8464	0.8325	0.7872	0.7695	0.7132	1.0714	0.9956	0.8346	0.7996	0.9268	0.7958	0.7244	0.9116	0.9212	0.7773	0.6377	0.9131		142	0.6613	0.522	0.6641	0.8924	0.6358	0.7041	0.6729	0.8561	0.8735	0.7099		142	0.5105	0.4451	0.7738	0.7391	0.6026	0.9595	0.7793	0.52
0.814125	0.0976216	0.67976	0.0992621	0.65221	0.196759		143	0.7081	0.9953	0.8788	0.8336	0.7594	0.831	0.8602	0.7798	0.96	0.919	0.8431	0.7096	0.9482	0.6889	0.6449	0.8673	0.7465	0.7711	0.7133	0.8244		143	0.5957	0.61	0.6172	0.7981	0.6188	0.6843	0.6103	0.8149	0.8426	0.6057		143	0.5338	0.466	0.8805	0.7016	0.5871	1.0063	0.8546	0.5397
0.837295	0.122738	0.72077	0.10016	0.64255	0.195544		144	0.6806	0.9123	0.7525	0.7388	0.8893	0.7598	0.9093	0.8803	1.1627	0.9897	0.7628	0.7373	0.9311	0.7769	0.6587	0.8458	0.8703	0.8201	0.7055	0.9621		144	0.711	0.5977	0.6708	0.8199	0.6521	0.6941	0.6573	0.9236	0.8159	0.6653		144	0.5363	0.4728	0.9105	0.6806	0.5764	0.9565	0.8554	0.515
0.849235	0.132197	0.70679	0.0970858	0.64819	0.195656		145	0.6152	0.9794	0.7869	0.7826	0.7593	0.7674	0.7928	0.7796	1.213	0.8832	0.859	0.7959	0.9268	0.9749	0.6766	0.8999	0.8913	0.9037	0.7185	0.9787		145	0.6609	0.6267	0.6932	0.7759	0.6403	0.5925	0.6353	0.8782	0.8454	0.7195		145	0.5144	0.4668	0.9428	0.7519	0.6507	0.9486	0.7723	0.5129
0.846155	0.144034	0.71444	0.100386	0.66563	0.186862		146	0.715	0.9788	0.7933	0.6971	0.7675	0.8686	0.7642	0.7171	1.216	0.9443	0.7235	0.7841	0.924	0.875	0.711	0.929	0.7563	0.9421	0.7056	1.1106		146	0.6573	0.5774	0.6522	0.8083	0.6319	0.639	0.7132	0.8851	0.7518	0.8282		146	0.5612	0.4581	0.9288	0.7148	0.6745	1.0044	0.7558	0.4881
0.840655	0.121762	0.72113	0.07195	0.62439	0.172221		147	0.7339	0.9342	0.7877	0.7607	0.73	0.7731	0.8599	0.6649	1.1642	0.921	0.7753	0.8737	0.9	0.9001	0.6708	0.8256	0.8672	0.8867	0.7445	1.0396		147	0.6683	0.6461	0.6728	0.7554	0.6533	0.6941	0.6999	0.8345	0.7407	0.8462		147	0.504	0.464	0.9441	0.6311	0.6302	0.8353	0.766	0.4849
0.80191	0.130238	0.6908	0.103932	0.61137	0.164787		148	0.7314	1.0064	0.7764	0.8397	0.6945	0.7049	0.7724	0.7434	1.0964	0.9744	0.7437	0.7914	0.8641	0.7387	0.5516	0.8385	0.8003	0.7634	0.6377	0.9689		148	0.6751	0.5342	0.6274	0.7615	0.5827	0.6671	0.6253	0.8083	0.7737	0.8527		148	0.4889	0.4722	0.8101	0.7627	0.6673	0.826	0.7367	0.4349
0.83637	0.138486	0.70143	0.0815548	0.66317	0.213632		149	0.7524	1.1132	0.7139	0.846	0.6817	0.7726	0.8398	0.7617	1.1915	0.9228	0.8722	0.7388	0.9027	0.8147	0.6154	0.9187	0.8363	0.732	0.7614	0.9396		149	0.6629	0.6894	0.6258	0.7186	0.5539	0.6488	0.7918	0.8046	0.7923	0.7262		149	0.4868	0.4632	0.9447	0.7007	0.6897	1.0197	0.8579	0.526
0.829075	0.160646	0.69314	0.0723602	0.65421	0.204292		150	0.8462	1.1655	0.7941	0.7894	0.8559	0.5069	0.7713	0.659	1.2137	0.9435	0.8753	0.6706	0.9424	0.7923	0.7287	0.8351	0.7724	0.7304	0.7693	0.9195		150	0.7002	0.6372	0.6139	0.7082	0.5724	0.7124	0.7653	0.6893	0.8236	0.7089		150	0.5032	0.4785	0.9387	0.5701	0.6228	1.0243	0.8451	0.5327
0.874105	0.132707	0.7409	0.072834	0.68187	0.242053		151	0.7936	1.0753	0.809	0.8318	0.7529	0.7671	0.9041	0.64	1.186	0.9245	0.8595	0.769	1.0499	0.8344	0.7229	0.9701	0.9396	0.9677	0.775	0.9097		151	0.7523	0.6278	0.7326	0.7373	0.6604	0.693	0.783	0.8537	0.8464	0.7225		151	0.5014	0.4833	0.94	0.617	0.7069	1.1455	0.9315	0.5057
0.85392	0.129653	0.71945	0.0988652	0.68336	0.208608		152	0.8275	0.9184	0.8705	0.751	0.8408	0.8159	0.9749	0.6002	1.1444	0.9885	0.814	0.6419	0.9562	0.7302	0.7137	0.9598	0.8827	0.9742	0.8096	0.864		152	0.6482	0.6518	0.6263	0.7132	0.6581	0.6937	0.7159	0.955	0.8177	0.7146		152	0.5151	0.4777	0.9573	0.672	0.6938	1.0218	0.9128	0.5227
0.787445	0.13596	0.69777	0.069611	0.67585	0.189941		153	0.7202	1.0027	0.9396	0.8267	0.6385	0.6428	0.7835	0.5376	1.0185	0.9604	0.8127	0.6521	0.856	0.6878	0.604	0.8961	0.7449	0.7842	0.7767	0.8639		153	0.7753	0.6446	0.6874	0.7436	0.5965	0.6592	0.6132	0.6998	0.764	0.7941		153	0.5085	0.4682	0.8993	0.7802	0.672	0.9278	0.9172	0.5111
0.843325	0.141439	0.72909	0.0546069	0.67838	0.222176		154	0.6932	1.147	0.8012	0.9089	0.6933	0.8433	0.7768	0.633	1.1096	0.905	0.7942	0.7801	0.9905	0.8164	0.673	0.9846	0.9519	0.8835	0.7173	0.7637		154	0.6939	0.6935	0.7151	0.6634	0.7494	0.726	0.6638	0.8309	0.7843	0.7706		154	0.5288	0.4574	0.9568	0.6662	0.7437	1.0707	0.8684	0.4951
0.782755	0.193589	0.72826	0.0866278	0.74404	0.243311		155	0.6474	1.0658	0.6559	0.8897	0.6132	0.5358	0.7811	0.5907	1.3417	0.7435	0.8434	0.701	1.0005	0.6478	0.6255	0.6999	0.8166	0.7517	0.7374	0.9665		155	0.7387	0.6784	0.6872	0.7046	0.6105	0.7063	0.6528	0.8838	0.7599	0.8604		155	0.5986	0.4677	1.0529	1.0616	0.7164	1.0491	0.864	0.4787
0.78542	0.1296	0.71513	0.0996295	0.67934	0.230382		156	0.6442	0.7701	0.7473	0.8897	0.6153	0.817	0.7483	0.7135	1.079	0.9278	0.852	0.6745	0.8838	0.723	0.5586	0.9594	0.773	0.7606	0.6614	0.9099		156	0.728	0.6265	0.6591	0.8424	0.6738	0.7594	0.5948	0.9158	0.6909	0.6606		156	0.5206	0.5182	0.7773	0.9522	0.6084	1.14	0.7916	0.4264
0.806455	0.108326	0.74491	0.0959287	0.69517	0.221917		157	0.6789	0.8889	0.7008	0.9201	0.8199	0.6364	0.8006	0.7985	1.1025	0.7417	0.7624	0.6688	0.8357	0.7643	0.763	0.9099	0.91	0.8405	0.7364	0.8498		157	0.6908	0.7065	0.6977	0.8292	0.7043	0.6522	0.6753	0.9765	0.7574	0.7592		157	0.4998	0.4683	0.8565	0.9896	0.7668	0.9818	0.856	0.4557
0.82362	0.149225	0.70839	0.0924585	0.6822	0.234997		158	0.6139	0.9881	0.7323	0.8573	0.8781	0.7362	0.704	0.6511	1.0818	0.8612	0.8511	0.6736	0.9696	0.7593	0.6169	1.0785	0.8964	0.8214	0.6825	1.0191		158	0.6548	0.6368	0.6601	0.8101	0.6315	0.6211	0.6737	0.8131	0.6997	0.883		158	0.5279	0.4747	0.8847	0.9947	0.6021	1.0329	0.8717	0.4749
0.78812	0.161442	0.68311	0.0944406	0.64897	0.159394		159	0.656	0.9085	0.8728	0.7115	0.7693	0.5868	0.7208	0.7649	1.0991	0.7436	0.8878	0.6386	0.9296	0.6211	0.5512	1.1317	0.7481	0.7396	0.6963	0.9851		159	0.5846	0.6987	0.688	0.8538	0.5881	0.5691	0.6065	0.7272	0.7686	0.7465		159	0.4945	0.5435	0.8229	0.7118	0.6897	0.8552	0.8624	0.4401
0.85204	0.168871	0.73576	0.0980843	0.70462	0.248226		160	0.6325	1.0557	0.8032	0.8873	0.7738	0.6672	0.7774	0.7498	1.0292	1.1093	0.8928	0.7306	1.1718	0.7283	0.5639	1.106	0.8204	0.7576	0.8967	0.8873		160	0.7873	0.5501	0.6211	0.7656	0.7916	0.7321	0.6615	0.8343	0.7482	0.8658		160	0.5173	0.4668	1.0761	0.7677	0.7811	1.0203	0.9617	0.429
0.818465	0.165202	0.71027	0.100179	0.66663	0.176734		161	0.6928	1.1539	0.6984	0.7317	0.9616	0.7887	0.7218	0.7147	1.1915	0.6806	0.8949	0.9586	0.9325	0.6431	0.579	0.8286	0.659	0.8458	0.7616	0.9305		161	0.596	0.6952	0.7196	0.7809	0.5926	0.6328	0.6791	0.9333	0.734	0.7392		161	0.5095	0.4851	0.8867	0.7977	0.6371	1.0141	0.6606	0.5347
0.8911	0.141001	0.70451	0.149919	0.64865	0.183315		162	0.7251	1.1584	0.8383	0.8933	0.9327	0.7493	0.7157	0.9416	1.0949	0.9585	0.9828	0.8065	0.9032	0.7182	0.7219	1.1781	0.9331	0.8971	0.7646	0.9087		162	0.6841	0.4423	0.7075	0.6573	0.6433	0.6132	0.7755	1.0165	0.676	0.8294		162	0.523	0.4633	0.7523	0.825	0.7375	0.938	0.8187	0.4635
0.868395	0.147218	0.69303	0.152494	0.66058	0.206864		163	0.7769	1.1256	0.8683	0.9551	0.7752	0.8265	0.7074	0.7698	1.0864	0.9528	0.9103	0.7023	1.0571	0.7191	0.6405	1.1302	0.9499	0.8136	0.7657	0.8352		163	0.7126	0.546	0.5825	0.9056	0.5478	0.5713	0.6873	0.9925	0.6462	0.7385		163	0.5156	0.4749	0.8678	0.8974	0.6811	0.9485	0.826	0.4307
0.84626	0.130875	0.67117	0.122196	0.68214	0.251404		164	0.6629	0.9754	0.7704	0.8823	0.8598	0.6394	0.6844	0.7747	1.033	0.946	0.8481	0.8354	1.0695	0.7996	0.6057	0.9528	1.0094	0.8555	0.8444	0.8765		164	0.6045	0.605	0.5063	0.8868	0.5692	0.6697	0.5846	0.8368	0.7455	0.7033		164	0.5294	0.4957	0.9024	0.939	0.5762	1.12	0.8777	0.4016
0.85206	0.133863	0.72566	0.104222	0.65228	0.193125		165	0.7414	0.9876	0.8713	0.805	0.9149	0.8155	0.6235	0.658	1.0878	0.9263	0.8327	0.7769	0.9986	0.7697	0.6461	0.9916	0.9964	0.7963	0.7865	1.0151		165	0.7286	0.6762	0.5536	0.8557	0.7129	0.655	0.626	0.8938	0.7712	0.7836		165	0.5396	0.4699	0.9149	0.7648	0.6338	0.9701	0.7738	0.4436
0.83104	0.121399	0.65653	0.082183	0.6622	0.185992		166	0.6845	0.943	0.7881	0.9448	0.871	0.6833	0.7043	0.7666	0.9866	0.8629	0.6486	0.787	1.0056	0.7511	0.6656	1.0172	0.929	0.7949	0.8241	0.9626		166	0.7188	0.6678	0.544	0.716	0.5625	0.5695	0.7052	0.7924	0.6055	0.6836		166	0.52	0.4983	0.8069	0.7995	0.6559	0.9782	0.8688	0.4786
0.863895	0.128434	0.71867	0.10028	0.64989	0.182141		167	0.7213	1.0834	0.8348	0.9383	0.8338	0.7158	0.7885	0.7458	1.0432	0.9493	0.7072	0.8065	1.0039	0.756	0.6961	1.0476	1.0064	0.8981	0.7679	0.934		167	0.6812	0.6372	0.5936	0.8285	0.6563	0.6435	0.7439	0.8919	0.6782	0.8324		167	0.5194	0.4549	0.8881	0.8	0.6787	0.8467	0.8535	0.4527
0.834785	0.156718	0.63854	0.1255	0.67139	0.207466		168	0.6194	1.0256	0.7657	0.8198	0.6884	0.7366	0.8494	0.7003	1.1149	1.0041	0.8142	0.7773	1.0084	0.6972	0.5833	1.0111	0.9603	0.7613	0.7209	1.0375		168	0.6343	0.4724	0.5358	0.8094	0.6159	0.4852	0.65	0.8518	0.6246	0.706		168	0.543	0.4628	0.8268	0.9789	0.6913	0.9262	0.8485	0.4662
0.844215	0.144674	0.70129	0.104915	0.64707	0.172591		169	0.6225	1.1173	0.717	0.8518	0.8199	0.8347	0.763	0.7308	0.8808	0.9423	0.8175	0.7175	1.1879	0.8142	0.6645	0.979	0.9356	0.8379	0.7001	0.95		169	0.6984	0.5689	0.5817	0.7116	0.7571	0.6855	0.6991	0.9105	0.6001	0.8		169	0.5229	0.4842	0.8527	0.7623	0.7263	0.9319	0.7139	0.4317
0.80642	0.118069	0.69075	0.101564	0.6418	0.181346		170	0.6375	1.0581	0.7337	0.8788	0.6595	0.7956	0.8143	0.7185	0.8289	0.7832	0.7348	0.7072	0.9974	0.7932	0.6682	0.997	0.9416	0.7994	0.7357	0.8458		170	0.6642	0.5902	0.6368	0.7397	0.5754	0.7392	0.7277	0.9274	0.6748	0.6321		170	0.5171	0.4922	0.7901	0.8785	0.6829	0.9005	0.7584	0.411
0.81361	0.126383	0.71619	0.120338	0.66892	0.213817		171	0.7402	1.0652	0.8032	0.7995	0.8006	0.7441	0.7142	0.6188	0.9846	0.8046	0.7167	0.7032	0.9477	0.8041	0.5607	0.9781	0.9252	0.8201	0.8343	0.9071		171	0.7076	0.5852	0.6061	0.883	0.626	0.7537	0.7146	0.9574	0.6666	0.6617		171	0.5148	0.4835	0.9061	0.8746	0.6689	0.9301	0.9107	0.4067
0.8055	0.120021	0.72556	0.125386	0.64477	0.199831		172	0.6876	0.9245	0.823	0.8155	0.7593	0.6399	0.7814	0.6986	0.9733	0.9512	0.7593	0.7842	0.9182	0.77	0.5378	0.9417	0.9625	0.7635	0.7066	0.9119		172	0.7018	0.6542	0.5405	0.9618	0.6702	0.7102	0.7183	0.9241	0.6811	0.6934		172	0.5192	0.4555	0.7852	0.8509	0.6138	0.9409	0.8777	0.3911
0.80473	0.110855	0.7153	0.110178	0.64024	0.203342		173	0.7164	0.9793	0.7807	0.8749	0.6962	0.7078	0.6915	0.7207	1.0537	0.8455	0.752	0.7747	0.8515	0.7476	0.6311	0.9829	0.854	0.7516	0.7862	0.8963		173	0.7133	0.5486	0.5834	0.8866	0.6596	0.706	0.728	0.8884	0.6934	0.7457		173	0.5227	0.4812	0.8109	0.878	0.6044	0.9586	0.8027	0.3776
0.803745	0.108497	0.70622	0.0638156	0.67	0.229456		174	0.8343	0.9378	0.7671	0.8923	0.757	0.6594	0.8012	0.7332	0.9298	0.8956	0.7457	0.768	0.8092	0.6652	0.6217	0.9538	0.8654	0.6723	0.7603	1.0056		174	0.7042	0.6994	0.6318	0.7753	0.625	0.7384	0.6859	0.827	0.7261	0.6491		174	0.5387	0.4977	0.786	0.977	0.5988	1.0818	0.8094	0.4122
0.818305	0.117914	0.70854	0.0875072	0.67135	0.239193		175	0.7502	0.9937	0.8183	0.7843	0.7476	0.7843	0.9087	0.7005	0.9418	0.888	0.7199	0.6483	0.8692	0.6826	0.6542	0.95	0.9184	0.7632	0.7781	1.0648		175	0.686	0.5947	0.7532	0.8633	0.6487	0.7989	0.6257	0.7703	0.6251	0.7195		175	0.5465	0.4606	0.8895	0.9479	0.5918	1.0326	0.8836	0.393
0.78851	0.113674	0.6958	0.0770851	0.65191	0.192308		176	0.6775	0.8916	0.8054	0.7384	0.7053	0.7454	0.8819	0.6722	0.9252	0.9258	0.8113	0.6785	0.905	0.6769	0.5378	0.9155	0.8834	0.7001	0.7757	0.9173		176	0.681	0.5882	0.6126	0.8453	0.6735	0.7119	0.707	0.7951	0.6558	0.6876		176	0.523	0.4608	0.8711	0.8271	0.6177	0.9195	0.8331	0.399
0.80485	0.128957	0.66827	0.0587433	0.63782	0.18318		177	0.6701	1.063	0.8233	0.8014	0.7226	0.754	0.8194	0.7333	0.9692	0.9708	0.7701	0.6518	0.8208	0.7198	0.55	1.0248	0.8998	0.7384	0.7612	0.8332		177	0.6917	0.5743	0.5965	0.7468	0.6746	0.6569	0.6833	0.7632	0.655	0.6404		177	0.5329	0.4754	0.864	0.8896	0.6211	0.8367	0.7456	0.3893
0.819345	0.133976	0.6422	0.0454188	0.64664	0.212016		178	0.5844	1.0614	0.7289	0.8181	0.8525	0.7828	0.8498	0.8042	0.9469	1.001	0.8065	0.6811	0.927	0.6968	0.5737	0.9524	0.9189	0.7142	0.7427	0.9436		178	0.679	0.5714	0.5841	0.7071	0.6341	0.6342	0.6393	0.7002	0.6135	0.6591		178	0.5077	0.4652	0.917	0.8661	0.6374	0.9221	0.8091	0.3846
0.77412	0.123755	0.67261	0.0693389	0.61573	0.196997		179	0.56	0.8737	0.7158	0.7635	0.8651	0.6247	0.7715	0.7627	0.9586	0.8985	0.7293	0.6386	0.8855	0.6938	0.5672	0.8442	0.9358	0.7184	0.7212	0.9543		179	0.6906	0.6438	0.6226	0.696	0.5569	0.6946	0.6349	0.6338	0.7577	0.7952		179	0.5078	0.4612	0.8379	0.7919	0.5934	0.9552	0.7208	0.3906
0.792345	0.131624	0.69106	0.0993103	0.64841	0.205394		180	0.53	0.8792	0.9011	0.8239	0.8349	0.6224	0.8883	0.796	0.9811	0.8712	0.6621	0.6441	0.8921	0.6652	0.634	0.8181	0.9373	0.7514	0.7225	0.992		180	0.6776	0.5017	0.6177	0.8055	0.6442	0.6882	0.6317	0.7296	0.8019	0.8125		180	0.5296	0.5068	0.7548	0.8411	0.6112	0.9647	0.9178	0.3982
0.76914	0.118335	0.67088	0.0795339	0.64297	0.204765		181	0.5899	0.8599	0.756	0.824	0.7232	0.6741	0.7405	0.7681	0.9815	0.8344	0.6221	0.6196	0.88	0.6582	0.6377	0.9027	0.9189	0.7163	0.731	0.9447		181	0.733	0.5256	0.579	0.7227	0.626	0.6366	0.6642	0.7372	0.7034	0.7811		181	0.5397	0.4694	0.7974	0.9306	0.5889	0.9354	0.8114	0.4003
0.763445	0.128357	0.64705	0.0693687	0.64656	0.209449		182	0.5828	0.9047	0.6968	0.8346	0.7337	0.582	0.702	0.7533	1.0712	0.8815	0.6236	0.6304	0.8486	0.6816	0.6011	0.8094	0.8599	0.8148	0.7808	0.8761		182	0.7045	0.5673	0.5682	0.7685	0.6093	0.6334	0.5917	0.657	0.6354	0.7352		182	0.5377	0.4689	0.8377	0.8843	0.5612	1.0046	0.7833	0.4209
[truncated: 7 more columns]
