# Supplementary material for: Hypoxia controls plasma membrane targeting of polarity proteins by dynamic turnover of PI4P and PI(4,5)P2
Source: eLife. 2022 Jun 9;11:e79582. doi: 10.7554/eLife.79582 (PMC9242647; doi:10.7554/eLife.79582)
Supplement: Figure 5—source data 1. [file elife-79582-fig5-data1.xlsx]

## Sheet: Figure 5A-P4MX2
Figure 5 Souce Data 1
						1	2	3	4	5	6	7	8	9	10			1	2	3	4	5	6	7	8	9	10
WT		RNAi			WT												RNAi
AVG	STDEV	AVG	STDEV
t_C2_PM/Cy	t_C2_PM/Cy	t_C2_PM/Cy	t_C2_PM/Cy		min	t_C2_PM/Cy	t_C2_PM/Cy	t_C2_PM/Cy	t_C2_PM/Cy	t_C2_PM/Cy	t_C2_PM/Cy	t_C2_PM/Cy	t_C2_PM/Cy	t_C2_PM/Cy	t_C2_PM/Cy		min	t_C2_PM/Cy	t_C2_PM/Cy	t_C2_PM/Cy	t_C2_PM/Cy	t_C2_PM/Cy	t_C2_PM/Cy	t_C2_PM/Cy	t_C2_PM/Cy	t_C2_PM/Cy	t_C2_PM/Cy
1.03765	0.0632025	1.1415	0.082101		1	1.0444	1.0216	1.0427	1.0371	1.0727	1.0688	1.0366	1.1614	0.9697	0.9215		1	1.2143	1.0601	1.1857	1.044	1.0309	1.1069	1.114	1.2643	1.1677	1.2271
1.00575	0.0499275	0.97642	0.0860743		2	0.9983	0.9899	0.9889	1.0806	1.0467	0.9756	0.9768	0.9082	1.0495	1.043		2	0.8511	0.9888	0.9834	1.0121	1.0425	0.9128	0.9398	0.988	0.89	1.1557
0.9566	0.0481342	0.88206	0.116213		3	0.9573	0.9885	0.9684	0.8823	0.8806	0.9556	0.9866	0.9304	0.9808	1.0355		3	0.9346	0.9512	0.8308	0.9439	0.9266	0.9803	0.9461	0.7477	0.9422	0.6172
0.98213	0.0908271	0.88251	0.122213		4	1.147	0.8483	0.9658	1.0475	0.9306	0.9417	1.105	0.9717	0.9263	0.9374		4	0.8406	0.8802	0.8926	0.8869	1.0236	0.9287	0.8953	0.7335	1.0815	0.6622
0.96744	0.0932145	0.85745	0.141544		5	0.8476	0.9011	1.0177	1.1103	0.9092	0.9359	1.1306	0.9531	0.9739	0.895		5	0.8983	0.7668	0.8764	0.9308	0.94	0.8869	0.9442	0.7533	1.0431	0.5347
0.98472	0.0820748	0.9489	0.32361		6	0.9443	0.9533	0.9671	0.9982	0.9151	0.8753	1.094	0.9483	1.1494	1.0022		6	0.7098	0.7558	0.9498	1.1111	0.9618	0.9139	1.0429	0.792	1.7277	0.5242
1.00304	0.0942464	0.90612	0.220345		7	1.1048	1.0008	1.0037	1.1137	0.9002	0.9166	1.0685	0.944	1.1138	0.8643		7	0.7537	0.7119	0.966	0.9615	1.0709	0.9111	0.9769	0.9085	1.3109	0.4898
1.07527	0.0612298	0.90641	0.199053		8	1.0356	1.0609	1.0783	1.2169	1.0248	1.0982	1.0807	1.0843	1.0899	0.9831		8	0.7497	0.8199	0.8746	0.9208	1.0406	1.0846	1.2233	0.8768	0.9765	0.4973
1.06434	0.086296	0.91972	0.134686		9	1.0491	1.1285	1.168	1.2179	0.944	0.9889	1.0719	0.98	1.0624	1.0327		9	0.8348	0.8279	0.8917	0.9164	1.0751	1.0165	1.0228	0.9326	1.0515	0.6279
1.03782	0.0940955	0.95252	0.183279		10	1.1274	1.0254	1.2064	1.1204	1.0044	0.945	1.0875	0.9887	0.9602	0.9128		10	0.8234	0.8499	0.8873	1.0195	1.0999	1.0136	1.0915	1.0102	1.1835	0.5464
1.08354	0.121308	0.99379	0.198461		11	1.2509	1.0767	1.2587	0.9618	1.0888	0.9157	1.2108	1.0631	1.0324	0.9765		11	0.8468	0.883	1.0284	1.0586	1.1239	1.0506	1.2658	1.062	1.0818	0.537
1.13316	0.118552	1.06719	0.23661		12	1.3031	1.2324	1.1924	1.0445	1.1282	1.0281	1.3118	1.0629	1.0222	1.006		12	0.8954	0.9085	1.146	1.0957	1.2177	1.1697	1.3756	1.2277	1.1039	0.5317
1.18992	0.147707	1.08776	0.239815		13	1.4172	1.2844	1.2561	1.0323	1.1363	1.0232	1.4197	1.1611	1.0837	1.0852		13	0.8922	0.8885	1.1148	1.1549	1.2102	1.4216	1.3027	1.145	1.1628	0.5849
1.20682	0.134405	1.11074	0.179603		14	1.3134	1.2806	1.4311	1.0028	1.1093	1.1163	1.3492	1.1943	1.1884	1.0828		14	0.8659	0.9317	1.1463	1.1437	1.2268	1.3832	1.2484	1.221	1.1074	0.833
1.21821	0.112457	1.10201	0.210624		15	1.2338	1.2483	1.3654	1.0281	1.1227	1.1926	1.3886	1.1908	1.2925	1.1193		15	0.868	0.9415	1.1978	1.1128	1.1657	1.5082	1.267	1.0939	1.0995	0.7657
1.24056	0.16951	1.1125	0.182488		16	1.3333	1.3292	1.3321	1.2235	1.0846	1.1251	1.5943	1.0771	1.273	1.0334		16	0.8587	0.9459	1.2537	1.1798	1.1849	1.3491	1.2873	1.1641	1.0855	0.816
1.23857	0.13001	1.06199	0.219946		17	1.3818	1.3303	1.2654	1.1576	1.1231	1.2279	1.4381	1.2455	1.2274	0.9886		17	0.7857	1.0176	1.1721	1.1068	1.09	1.485	1.219	1.0096	1.04	0.6941
1.22653	0.154837	1.08773	0.21792		18	1.3434	1.4285	1.0781	1.175	1.2093	1.1401	1.5008	1.1646	1.2221	1.0034		18	0.7616	0.9918	1.2795	1.157	1.171	1.214	1.3406	1.0436	1.2315	0.6867
1.24574	0.172098	1.06532	0.182184		19	1.3768	1.4	1.2041	1.2303	1.1373	1.0708	1.5536	1.3071	1.2179	0.9595		19	0.8027	1.0506	1.2219	1.1503	1.1487	1.1898	1.2377	0.9964	1.1544	0.7007
1.24612	0.175317	1.052	0.21552		20	1.3752	1.4411	1.2559	1.1694	1.2694	1.055	1.5137	1.2641	1.1942	0.9232		20	0.7692	1.0475	1.1621	1.0324	1.1218	1.3687	1.1441	1.0617	1.1972	0.6153
1.26223	0.150954	1.07775	0.251301		21	1.3205	1.4065	1.151	1.1025	1.3979	1.1943	1.4923	1.3605	1.1414	1.0554		21	0.7678	0.9465	1.2674	1.1203	1.1843	1.4016	1.2796	1.0249	1.1999	0.5852
1.25496	0.181696	1.02138	0.246261		22	1.3009	1.2196	1.1375	1.1179	1.3676	1.1698	1.6624	1.396	1.0994	1.0785		22	0.7612	0.8599	1.1137	1.0068	1.147	1.3923	1.2408	0.9093	1.204	0.5788
1.2309	0.123116	0.98419	0.223624		23	1.3012	1.2325	1.259	1.1218	1.3361	1.1048	1.4886	1.2239	1.1429	1.0982		23	0.7151	0.8306	1.0586	1.0271	1.1267	1.2708	1.2794	0.8948	1.0371	0.6017
1.26389	0.108386	0.95339	0.190918		24	1.2995	1.2571	1.2945	1.1757	1.3299	1.2397	1.4541	1.334	1.2056	1.0488		24	0.719	0.8942	1.0388	0.9198	1.0553	1.2045	1.1622	0.9007	1.0495	0.5899
1.26599	0.146827	0.97487	0.198474		25	1.3145	1.328	1.2927	1.0414	1.4147	1.1069	1.4828	1.3745	1.2	1.1044		25	0.7029	0.9268	0.9769	0.9682	1.103	1.2411	1.156	0.973	1.1025	0.5983
1.24862	0.166222	0.96923	0.199089		26	1.3058	1.3672	1.2149	1.104	1.5136	1.1555	1.4556	1.276	1.0985	0.9951		26	0.6898	0.8865	1.0704	1.0858	1.0012	1.1596	1.1552	1.0332	1.0485	0.5621
1.2061	0.17135	0.96703	0.196228		27	1.2058	1.3851	1.1349	1.1085	1.3524	1.0871	1.5002	1.2667	1.097	0.9233		27	0.6892	0.8802	1.0515	1.1439	0.9769	1.0838	1.2183	0.984	1.049	0.5935
1.21224	0.214159	0.93208	0.176859		28	1.2583	1.3176	1.1677	1.0807	1.3715	0.9724	1.6741	1.2182	1.1266	0.9353		28	0.682	0.8674	1.0204	1.0068	1.066	1.1247	1.0694	0.9144	0.9896	0.5801
1.18925	0.171137	0.91132	0.183373		29	1.2096	1.3336	1.2133	1.1362	1.3277	0.9126	1.4856	1.2151	1.0721	0.9867		29	0.6733	0.7448	1.0349	0.9691	1.0983	1.0689	1.1105	0.8516	0.9578	0.604
1.14916	0.134982	0.89972	0.1921		30	1.1689	1.4078	1.1769	1.0738	1.1675	0.9597	1.2763	1.2149	1.0516	0.9942		30	0.6567	0.6857	1.0412	0.9432	1.0299	1.0984	1.08	0.9303	0.9655	0.5663
1.12154	0.14496	0.89771	0.19232		31	1.1527	1.288	1.1959	1.0449	1.1756	0.8929	1.3129	1.2181	0.9785	0.9559		31	0.6346	0.717	1.0179	1.0252	1.0064	1.0989	1.0625	0.8928	0.9651	0.5567
1.16772	0.140423	0.87606	0.159587		32	1.2061	1.258	1.2093	1.0829	1.278	0.9463	1.3577	1.2999	1.0088	1.0302		32	0.6414	0.79	0.9482	1.032	0.9346	0.9845	1.0086	0.891	0.9647	0.5656
1.14766	0.158752	0.8597	0.174514		33	1.1817	1.1964	1.2668	1.0853	1.363	0.8929	1.3229	1.2093	1.0154	0.9429		33	0.6174	0.7819	0.8941	1.0079	1.0596	0.9087	1.0327	0.8245	0.9371	0.5331
1.11434	0.126846	0.8499	0.169546		34	1.0978	1.2683	1.1579	1.0469	1.2651	0.9701	1.2602	1.1517	0.9958	0.9296		34	0.6334	0.7644	0.9546	0.9457	0.9862	1.0541	0.9597	0.8112	0.8716	0.5181
1.1244	0.0928187	0.84285	0.178061		35	1.1466	1.2481	1.1743	1.1178	1.1679	1.0486	1.2419	1.1158	1.0259	0.9571		35	0.6346	0.751	0.9913	0.9499	0.9152	0.982	1.0625	0.7574	0.8854	0.4992
1.12231	0.145004	0.82333	0.174262		36	1.1199	1.2027	1.2036	0.9922	1.3702	0.9484	1.2509	1.1765	1.0393	0.9194		36	0.593	0.6912	0.9443	0.9031	0.9375	0.9948	0.9668	0.7767	0.9277	0.4982
1.09287	0.155802	0.80862	0.173058		37	1.1501	1.1343	1.1722	1.0021	1.3597	0.8465	1.2636	1.0734	1.0081	0.9187		37	0.5949	0.6599	0.9167	0.8723	0.8735	1	0.9935	0.7366	0.9314	0.5074
1.07008	0.105673	0.82071	0.160334		38	1.08	1.092	1.1712	0.9768	1.213	0.9283	1.1952	1.1157	0.9776	0.951		38	0.5951	0.6835	0.9239	0.943	0.8774	0.9817	0.9651	0.779	0.913	0.5454
1.04273	0.10409	0.81338	0.160384		39	1.1208	1.0944	1.0948	0.9447	1.0738	0.8968	1.2089	1.114	0.9491	0.93		39	0.6025	0.624	0.9384	0.9736	0.9126	0.8962	1.0037	0.78	0.8254	0.5774
1.04983	0.0958735	0.80871	0.173163		40	1.0983	1.1668	1.0881	0.9869	1.1038	0.9083	1.1314	1.0992	1.0361	0.8794		40	0.5967	0.6413	0.9693	0.9699	0.888	0.9681	0.9581	0.7526	0.8302	0.5129
1.05608	0.12945	0.78679	0.156405		41	1.0468	1.1352	1.1456	0.959	1.2451	0.8705	1.096	1.1885	1.0056	0.8685		41	0.5476	0.6801	0.9192	0.8701	0.8829	0.9267	0.9268	0.7783	0.8269	0.5093
1.04885	0.121116	0.78472	0.164831		42	1.1189	1.0533	1.1374	0.9976	1.2335	0.8645	1.1837	1.0429	0.9537	0.903		42	0.5604	0.6156	0.8297	0.9631	0.8927	0.9116	0.9109	0.8166	0.8497	0.4969
1.02111	0.104003	0.75248	0.155395		43	1.0601	1.0581	1.1935	0.9211	1.1357	0.8976	1.0564	1.0578	0.942	0.8888		43	0.5403	0.6292	0.8512	0.883	0.8897	0.8568	0.871	0.6809	0.8414	0.4813
1.0158	0.0997001	0.74541	0.153877		44	1.1064	1.0587	1.1363	0.9891	1.077	0.8877	1.1084	1.0243	0.9094	0.8607		44	0.5427	0.6229	0.8085	0.8922	0.8626	0.8891	0.887	0.6815	0.7888	0.4788
0.98095	0.110206	0.74814	0.155429		45	1.049	0.987	1.043	0.9581	0.994	0.8249	1.1875	1.0435	0.8773	0.8452		45	0.5587	0.5735	0.8364	0.939	0.8469	0.8629	0.8678	0.6915	0.8073	0.4974
0.92853	0.0897805	0.75347	0.172332		46	1.0422	1.0208	0.9706	0.8921	0.9304	0.7784	1.0126	0.9557	0.8761	0.8064		46	0.5357	0.5875	0.8277	0.979	0.8568	0.8536	0.9452	0.6643	0.7939	0.491
0.92366	0.111428	0.73885	0.169889		47	1.0316	0.9639	1.0047	0.9017	1.0086	0.7715	0.9672	1.0392	0.7509	0.7973		47	0.5312	0.5824	0.8331	0.9462	0.8642	0.8479	0.8944	0.6673	0.77	0.4518
0.91831	0.102138	0.72936	0.158232		48	1.0481	0.9299	0.9788	0.9472	0.9125	0.7901	1.0322	0.9711	0.7342	0.839		48	0.5317	0.5826	0.8506	0.867	0.8301	0.7587	0.9441	0.6495	0.8001	0.4792
0.88136	0.0796848	0.74348	0.163151		49	0.9414	0.903	0.9481	0.8036	0.9426	0.8064	1.0116	0.8627	0.768	0.8262		49	0.5416	0.6064	0.8703	0.8405	0.8677	0.8318	0.964	0.6698	0.7753	0.4674
0.86345	0.072573	0.72422	0.152097		50	0.9349	0.8698	0.9086	0.7952	0.961	0.7423	0.9259	0.8861	0.7953	0.8154		50	0.5355	0.5849	0.7686	0.8398	0.8561	0.7838	0.8947	0.6806	0.8423	0.4559
0.85406	0.0786409	0.72687	0.162597		51	0.944	0.8034	0.9581	0.8388	0.785	0.77	0.9636	0.8977	0.7895	0.7905		51	0.5168	0.5551	0.8149	0.8543	0.8446	0.8634	0.9118	0.6499	0.7847	0.4732
0.83353	0.094113	0.7157	0.142159		52	0.9481	0.7707	0.9742	0.8203	0.7359	0.752	0.9499	0.8697	0.7597	0.7548		52	0.5354	0.5915	0.7521	0.8492	0.7989	0.8068	0.9037	0.673	0.7737	0.4727
0.80408	0.0797897	0.71423	0.146285		53	0.9136	0.7447	0.9445	0.8019	0.7823	0.7391	0.8171	0.8582	0.7228	0.7166		53	0.5274	0.5695	0.7589	0.8307	0.8277	0.8296	0.8869	0.676	0.768	0.4676
0.78957	0.0588869	0.71012	0.145815		54	0.8802	0.7831	0.8606	0.7355	0.823	0.727	0.8355	0.7964	0.73	0.7244		54	0.5241	0.5484	0.7708	0.8786	0.7932	0.8107	0.867	0.689	0.7444	0.475
0.78107	0.0685093	0.71487	0.141931		55	0.8549	0.7998	0.8378	0.7191	0.8656	0.7108	0.8113	0.8133	0.6683	0.7298		55	0.529	0.5488	0.7781	0.8447	0.8104	0.7953	0.89	0.6837	0.7724	0.4963
0.78411	0.0803676	0.71162	0.161993		56	0.8376	0.7952	0.9522	0.7041	0.8467	0.7209	0.7571	0.8069	0.696	0.7244		56	0.4895	0.5659	0.7641	0.9014	0.8303	0.8099	0.8936	0.658	0.7483	0.4552
0.76538	0.0659591	0.7023	0.152244		57	0.8477	0.8009	0.8281	0.6992	0.8057	0.6534	0.7948	0.7866	0.6802	0.7572		57	0.5091	0.5301	0.795	0.8124	0.7842	0.8158	0.8704	0.6487	0.8009	0.4564
0.76171	0.0596977	0.71408	0.149949		58	0.833	0.7893	0.8316	0.7634	0.8285	0.6836	0.7658	0.7348	0.6742	0.7129		58	0.526	0.5378	0.8016	0.8594	0.7999	0.7884	0.8913	0.6871	0.7765	0.4728
0.74818	0.0463473	0.71293	0.144048		59	0.8271	0.7609	0.8149	0.7039	0.7775	0.7281	0.7476	0.7198	0.7032	0.6988		59	0.5273	0.5515	0.7722	0.8605	0.8144	0.7896	0.8896	0.6502	0.775	0.499
0.74033	0.0660565	0.71545	0.146408		60	0.8472	0.7472	0.7705	0.7033	0.7342	0.6831	0.7927	0.8121	0.6679	0.6451		60	0.5145	0.5272	0.7764	0.8639	0.8161	0.8183	0.8664	0.6598	0.7932	0.5187
0.74198	0.05314	0.71315	0.157425		61	0.8089	0.7362	0.7587	0.7212	0.7275	0.6607	0.7763	0.8331	0.6905	0.7067		61	0.5218	0.55	0.7408	0.8193	0.8426	0.8551	0.9342	0.6365	0.7518	0.4794
0.71244	0.0508659	0.69235	0.148758		62	0.8012	0.6889	0.7587	0.6831	0.6519	0.6876	0.7609	0.7427	0.6477	0.7017		62	0.5084	0.5227	0.708	0.8402	0.8245	0.8175	0.837	0.6546	0.7533	0.4573
0.71467	0.06452	0.70483	0.142872		63	0.8126	0.6892	0.8141	0.6976	0.6532	0.675	0.7416	0.7625	0.6357	0.6652		63	0.5213	0.5529	0.7387	0.8533	0.8467	0.7852	0.8451	0.6637	0.765	0.4764
0.70934	0.063836	0.71465	0.155444		64	0.7857	0.6605	0.7924	0.6827	0.6525	0.6936	0.7802	0.7638	0.6457	0.6363		64	0.5079	0.5452	0.8188	0.831	0.8406	0.8239	0.8799	0.6658	0.7666	0.4668
0.69098	0.0609421	0.69221	0.144501		65	0.7489	0.6904	0.7853	0.6395	0.6084	0.6677	0.7636	0.7139	0.6203	0.6718		65	0.501	0.5418	0.7282	0.8245	0.809	0.7767	0.8567	0.6547	0.7708	0.4587
0.70403	0.0588969	0.70697	0.154548		66	0.7517	0.6661	0.8083	0.6386	0.6375	0.6889	0.7463	0.7632	0.6637	0.676		66	0.5003	0.5493	0.7999	0.8647	0.8249	0.7886	0.8585	0.654	0.7737	0.4558
0.69638	0.0555665	0.69433	0.148893		67	0.7183	0.6797	0.8056	0.6848	0.6359	0.6728	0.7462	0.7399	0.6337	0.6469		67	0.4958	0.527	0.7643	0.8274	0.8203	0.7554	0.8798	0.6431	0.7571	0.4731
0.69267	0.0507248	0.70548	0.157071		68	0.7315	0.6581	0.7787	0.655	0.6576	0.6678	0.7594	0.7252	0.6418	0.6516		68	0.5025	0.5386	0.7328	0.8655	0.8076	0.826	0.9069	0.6573	0.7504	0.4672
0.68394	0.047146	0.7104	0.153497		69	0.7381	0.6491	0.7607	0.6703	0.6288	0.674	0.7069	0.7182	0.6138	0.6795		69	0.5048	0.5576	0.7739	0.8394	0.8211	0.8077	0.9095	0.6485	0.7699	0.4716
0.69095	0.0495305	0.71495	0.157993		70	0.7358	0.6905	0.76	0.6334	0.6367	0.6837	0.7324	0.7341	0.6176	0.6853		70	0.5049	0.5556	0.7392	0.8668	0.8617	0.8013	0.927	0.6665	0.7446	0.4819
0.6779	0.0602573	0.70597	0.156542		71	0.7457	0.6601	0.731	0.6351	0.607	0.7088	0.763	0.7058	0.6006	0.6219		71	0.5021	0.5659	0.7512	0.8209	0.8439	0.7704	0.9594	0.6205	0.7392	0.4862
0.68862	0.0653264	0.70019	0.151149		72	0.751	0.6467	0.7916	0.6271	0.6372	0.6839	0.7473	0.7473	0.6022	0.6519		72	0.517	0.5485	0.7298	0.8418	0.7935	0.8029	0.9106	0.6186	0.7695	0.4697
0.68527	0.0686123	0.70993	0.153137		73	0.7353	0.6137	0.8151	0.6552	0.645	0.6723	0.7346	0.7386	0.5917	0.6512		73	0.5132	0.5496	0.7608	0.8668	0.8114	0.8297	0.8952	0.6083	0.7701	0.4942
0.67295	0.0626132	0.70364	0.155947		74	0.7716	0.6214	0.7739	0.6292	0.6184	0.6651	0.6909	0.706	0.5947	0.6583		74	0.5078	0.5354	0.7809	0.8462	0.8078	0.7822	0.9194	0.6615	0.7356	0.4596
0.68218	0.060889	0.70611	0.154666		75	0.7483	0.6391	0.7677	0.6745	0.6214	0.6533	0.7119	0.7612	0.6008	0.6436		75	0.5036	0.5456	0.7367	0.8759	0.8148	0.7644	0.8985	0.6473	0.8008	0.4735
0.67188	0.0557021	0.70459	0.160332		76	0.7574	0.6218	0.742	0.6533	0.6097	0.6678	0.6979	0.7271	0.6168	0.625		76	0.5004	0.543	0.7435	0.8504	0.7806	0.7783	0.9585	0.6463	0.7777	0.4672
0.68111	0.0594285	0.70165	0.153938		77	0.7613	0.645	0.748	0.6626	0.6208	0.6615	0.7271	0.7491	0.6025	0.6332		77	0.5085	0.5385	0.7159	0.8543	0.8144	0.8281	0.8797	0.6431	0.7714	0.4626
0.67365	0.0635261	0.70525	0.16468		78	0.7377	0.6708	0.7521	0.6236	0.6338	0.6728	0.7602	0.7031	0.5893	0.5931		78	0.4984	0.5381	0.7625	0.8569	0.8044	0.7988	0.9483	0.6228	0.761	0.4613
0.67662	0.0559503	0.7139	0.163326		79	0.7643	0.6353	0.7487	0.6401	0.637	0.6703	0.7274	0.7074	0.6077	0.628		79	0.5054	0.5565	0.7667	0.8674	0.7976	0.7908	0.9898	0.642	0.7344	0.4884
0.6707	0.0609217	0.70415	0.153665		80	0.7579	0.6183	0.7337	0.6334	0.6247	0.6696	0.7289	0.7304	0.6066	0.6035		80	0.528	0.5519	0.7304	0.8249	0.8503	0.8095	0.9119	0.6207	0.7511	0.4628
0.66203	0.0666053	0.70963	0.166503		81	0.7223	0.5758	0.7363	0.661	0.5926	0.6881	0.7055	0.7459	0.6087	0.5841		81	0.5006	0.5439	0.7238	0.8455	0.8421	0.7815	0.9777	0.6368	0.7714	0.473
0.68282	0.0734833	0.71155	0.158019		82	0.7677	0.6175	0.7689	0.6803	0.5918	0.6786	0.753	0.7533	0.6241	0.593		82	0.523	0.5292	0.7754	0.8248	0.8606	0.7582	0.9313	0.6353	0.7969	0.4808
0.69537	0.0823349	0.70937	0.167331		83	0.8365	0.6646	0.794	0.6921	0.579	0.6963	0.7497	0.7152	0.6135	0.6128		83	0.5064	0.528	0.7247	0.8092	0.85	0.7593	0.9768	0.6288	0.8307	0.4798
0.7015	0.100853	0.72361	0.183894		84	0.9097	0.6116	0.7973	0.7052	0.5833	0.7042	0.7274	0.7416	0.6332	0.6015		84	0.5045	0.5234	0.7391	0.8317	0.842	0.8251	1.0144	0.6249	0.8642	0.4668
0.72546	0.127642	0.73486	0.201026		85	0.9179	0.6365	0.9295	0.7334	0.5628	0.7047	0.7741	0.7802	0.6114	0.6041		85	0.498	0.5349	0.7089	0.9063	0.8087	0.7761	1.0154	0.6548	0.992	0.4535
0.74624	0.111399	0.72372	0.190273		86	0.9215	0.6524	0.9046	0.7831	0.651	0.6987	0.8435	0.7324	0.6137	0.6615		86	0.4923	0.535	0.7226	0.7877	0.811	0.7868	0.9831	0.6447	1.0082	0.4658
0.76264	0.127415	0.7423	0.198539		87	0.9609	0.689	0.9408	0.8506	0.6133	0.6794	0.8328	0.7693	0.6382	0.6521		87	0.5289	0.524	0.7624	0.8257	0.8005	0.7898	1.0113	0.6447	1.0554	0.4803
0.78111	0.132755	0.72638	0.1927		88	0.9214	0.6892	1.0106	0.8334	0.5996	0.7545	0.8876	0.794	0.6802	0.6406		88	0.5214	0.5334	0.7357	0.8175	0.7925	0.7887	1.038	0.6146	0.9642	0.4578
0.81972	0.157518	0.72629	0.196129		89	0.9261	0.703	1.0816	0.8912	0.6107	0.7578	1.0346	0.7927	0.7268	0.6727		89	0.4922	0.5401	0.7199	0.8251	0.7809	0.7999	0.9799	0.6095	1.0393	0.4761
0.82561	0.139856	0.73965	0.217797		90	0.9778	0.7065	1.0334	0.8847	0.6488	0.7217	1.0056	0.8126	0.7378	0.7272		90	0.5106	0.5233	0.7528	0.8085	0.8144	0.7782	0.9904	0.6033	1.1429	0.4721
0.84505	0.123253	0.73173	0.195816		91	0.9721	0.7186	1.0541	0.8707	0.6923	0.7568	0.9567	0.8976	0.7915	0.7401		91	0.4982	0.5136	0.7526	0.8289	0.8303	0.7737	0.9481	0.6416	1.0519	0.4784
0.85196	0.114848	0.73036	0.191921		92	0.9758	0.7484	1.0672	0.8216	0.7035	0.7645	0.9526	0.8795	0.8095	0.797		92	0.4979	0.5574	0.731	0.8359	0.8168	0.7917	1.0016	0.6269	0.9875	0.4569
0.88942	0.133733	0.75139	0.215857		93	1.0243	0.7869	1.0675	0.8912	0.7174	0.7479	1.062	0.9442	0.8978	0.755		93	0.5018	0.5366	0.781	0.8032	0.8288	0.7848	1.1399	0.647	1.0084	0.4824
0.88404	0.120657	0.75219	0.228348		94	0.9859	0.8017	1.0001	0.9023	0.7181	0.7519	1.1042	0.8838	0.8894	0.803		94	0.501	0.5401	0.7701	0.79	0.793	0.7998	1.1185	0.6492	1.1035	0.4567
0.89587	0.142203	0.74248	0.207119		95	0.9837	0.7613	1.1363	0.9396	0.6914	0.7796	1.0797	0.8571	0.9093	0.8207		95	0.4949	0.5463	0.7732	0.8269	0.799	0.7612	1.0287	0.6361	1.0782	0.4803
0.908	0.119704	0.73869	0.202389		96	0.9307	0.7876	1.1102	0.9144	0.7692	0.7755	1.092	0.9026	0.9317	0.8661		96	0.5145	0.5405	0.7679	0.8282	0.7916	0.7732	1.0229	0.6155	1.0568	0.4758
0.89528	0.0970825	0.74655	0.221332		97	0.8759	0.7984	0.9974	0.94	0.7266	0.7849	1.022	0.9475	0.95	0.9101		97	0.5078	0.5302	0.7361	0.8098	0.7882	0.7844	1.1156	0.6406	1.0769	0.4759
0.90704	0.0934153	0.75407	0.224184		98	0.9216	0.7912	1.0424	0.8726	0.7358	0.8676	1.0074	0.9506	0.9284	0.9528		98	0.4933	0.5376	0.7579	0.8315	0.7841	0.7947	1.1068	0.6183	1.1084	0.5081
0.90467	0.136066	0.73986	0.197782		99	0.8925	0.7499	1.0705	0.8261	0.7829	0.8065	1.1814	0.9664	0.845	0.9255		99	0.4954	0.5387	0.7764	0.8353	0.8125	0.8244	0.9862	0.6366	1.0272	0.4659
0.86154	0.115014	0.73551	0.204652		100	0.828	0.7006	1.0591	0.8318	0.7648	0.7729	1.0441	0.8827	0.8424	0.889		100	0.4948	0.5336	0.7222	0.8363	0.8014	0.8027	1.0079	0.6252	1.0578	0.4732
0.86064	0.0886566	0.74112	0.217834		101	0.8343	0.7941	1.0082	0.8388	0.7709	0.8068	1.0335	0.8665	0.8169	0.8364		101	0.5005	0.5281	0.7472	0.8182	0.8049	0.7692	0.9781	0.6148	1.1618	0.4884
0.83972	0.0907073	0.73814	0.201478		102	0.8452	0.7192	0.925	0.8084	0.7058	0.811	1.0176	0.8483	0.8644	0.8523		102	0.5025	0.5221	0.7196	0.8619	0.8134	0.767	1.0674	0.6421	0.991	0.4944
0.83567	0.0763696	0.72882	0.183717		103	0.8381	0.7838	1.0053	0.8197	0.7195	0.7963	0.9027	0.8293	0.8549	0.8071		103	0.5003	0.5392	0.7446	0.8259	0.8411	0.8293	0.9837	0.6316	0.9272	0.4653
0.83254	0.0780792	0.73448	0.19866		104	0.8492	0.7957	0.9674	0.8787	0.7237	0.7456	0.9348	0.8401	0.8049	0.7853		104	0.4941	0.5405	0.742	0.8525	0.849	0.8273	1.0625	0.6273	0.896	0.4536
0.83159	0.0863713	0.71919	0.18353		105	0.8344	0.8071	0.9764	0.8261	0.7326	0.8065	0.9704	0.8655	0.7277	0.7692		105	0.502	0.546	0.7363	0.8308	0.7931	0.7548	1.0531	0.6288	0.8768	0.4702
0.80945	0.0881046	0.71857	0.182857		106	0.7763	0.7414	0.9276	0.78	0.765	0.703	0.9653	0.8887	0.7358	0.8114		106	0.5025	0.5282	0.7698	0.8333	0.777	0.8037	1.0363	0.6427	0.8389	0.4533
0.80144	0.0963256	0.72968	0.18165		107	0.7637	0.7143	0.9786	0.8347	0.7154	0.7546	0.9282	0.8677	0.7028	0.7544		107	0.5127	0.5552	0.7333	0.8433	0.8321	0.7573	1.0372	0.6379	0.9057	0.4821
0.80618	0.0831151	0.74404	0.214071		108	0.8061	0.7356	0.9764	0.8331	0.7028	0.7915	0.8729	0.8347	0.6998	0.8089		108	0.5009	0.5248	0.7365	0.8845	0.8243	0.7626	1.0657	0.6226	1.0421	0.4764
0.77454	0.0871641	0.73414	0.206127		109	0.7704	0.6716	0.9813	0.7491	0.7422	0.7917	0.8174	0.81	0.6901	0.7216		109	0.5016	0.5265	0.7489	0.8004	0.8216	0.7737	1.0249	0.6184	1.0558	0.4696
0.7649	0.069711	0.71945	0.192556		110	0.7615	0.6734	0.8563	0.7987	0.6905	0.745	0.7971	0.8849	0.7035	0.7381		110	0.4901	0.5271	0.7351	0.8043	0.8041	0.7785	1.0682	0.6157	0.8994	0.472
0.7864	0.0897355	0.73319	0.188666		111	0.7467	0.666	0.9821	0.8505	0.7567	0.7297	0.8485	0.801	0.7116	0.7712		111	0.4962	0.5448	0.7506	0.9058	0.8233	0.8146	1.0037	0.6219	0.902	0.469
0.78223	0.0897713	0.7143	0.178564		112	0.7324	0.6855	0.9794	0.7709	0.7305	0.7357	0.8965	0.7872	0.7209	0.7833		112	0.4938	0.5203	0.7131	0.8326	0.8075	0.8071	0.9867	0.65	0.8738	0.4581
0.77337	0.112209	0.72236	0.177354		113	0.7725	0.725	1.0715	0.7345	0.7314	0.7229	0.7942	0.8062	0.6949	0.6806		113	0.5022	0.5549	0.77	0.8117	0.7859	0.7957	1.0328	0.6091	0.8733	0.488
0.75377	0.0970337	0.75084	0.2248		114	0.7738	0.7052	0.978	0.7392	0.646	0.6931	0.8183	0.8098	0.6846	0.6897		114	0.49	0.5495	0.7294	0.8293	0.8304	0.7865	1.1437	0.6232	1.047	0.4794
0.78183	0.0989496	0.74561	0.206018		115	0.7998	0.747	1.0126	0.8222	0.7183	0.7168	0.8271	0.8031	0.6507	0.7207		115	0.4896	0.5348	0.7353	0.8501	0.8349	0.8093	1.0756	0.6524	0.9932	0.4809
0.79066	0.12413	0.75601	0.217627		116	0.8485	0.6943	1.0835	0.7926	0.7186	0.7119	0.8899	0.7695	0.6693	0.7285		116	0.5053	0.5363	0.7852	0.7939	0.8308	0.8176	1.0508	0.6561	1.1114	0.4727
0.76839	0.136742	0.73239	0.192344		117	0.8666	0.6653	1.0766	0.6891	0.668	0.7	0.8684	0.8093	0.6473	0.6933		117	0.5112	0.5391	0.7457	0.8202	0.8232	0.7618	1.0523	0.6192	0.9648	0.4864
0.75367	0.112477	0.71887	0.16531		118	0.8786	0.6786	0.9963	0.686	0.673	0.7046	0.8229	0.7641	0.6598	0.6728		118	0.5	0.5438	0.7793	0.8306	0.7982	0.8049	0.9646	0.676	0.8254	0.4659
0.76167	0.137074	0.72388	0.196425		119	0.8716	0.6692	1.0715	0.6789	0.668	0.7814	0.8117	0.7936	0.6583	0.6125		119	0.511	0.5367	0.7351	0.8423	0.855	0.7362	1.1081	0.6268	0.8248	0.4628
0.77813	0.134374	0.724	0.195027		120	0.9045	0.7241	1.0665	0.7113	0.7003	0.7838	0.8406	0.7921	0.6551	0.603		120	0.4969	0.5392	0.7351	0.8607	0.8056	0.7771	1.1024	0.6467	0.8176	0.4587
0.78249	0.111261	0.72818	0.191037		121	0.9075	0.7525	0.9885	0.7295	0.741	0.8171	0.8149	0.7853	0.7054	0.5832		121	0.5066	0.5444	0.7257	0.831	0.8054	0.7647	1.11	0.6468	0.8598	0.4874
0.79001	0.102637	0.73107	0.191528		122	0.8863	0.7931	0.9956	0.7787	0.7192	0.7413	0.8347	0.812	0.7158	0.6234		122	0.5039	0.5353	0.7553	0.8189	0.7891	0.7782	1.0585	0.6467	0.9483	0.4765
0.79418	0.109921	0.73076	0.17638		123	0.8644	0.7926	1.0453	0.7389	0.7637	0.7641	0.818	0.8231	0.6934	0.6383		123	0.5152	0.6004	0.7241	0.8709	0.8008	0.7734	0.991	0.6198	0.9393	0.4727
0.80887	0.0948073	0.74807	0.175169		124	0.8886	0.8268	0.9981	0.8011	0.8215	0.7673	0.8297	0.7728	0.7511	0.6317		124	0.5314	0.6289	0.7322	0.8386	0.8314	0.8212	1.0345	0.6324	0.9349	0.4952
0.82086	0.145749	0.75597	0.171303		125	0.8559	0.8617	1.1557	0.7929	0.8427	0.7172	0.8497	0.7697	0.7862	0.5769		125	0.5312	0.6762	0.7293	0.868	0.7983	0.8474	0.9626	0.6759	0.9941	0.4767
0.81942	0.117166	0.76702	0.177023		126	0.841	0.9368	1.0365	0.7453	0.8526	0.7441	0.8766	0.7729	0.7752	0.6132		126	0.5436	0.6708	0.7549	0.8572	0.8103	0.8316	1.025	0.7133	0.9931	0.4704
0.8171	0.113209	0.78619	0.167769		127	0.8298	0.9038	0.9938	0.7064	0.9428	0.7591	0.8463	0.8094	0.7663	0.6133		127	0.572	0.6933	0.7774	0.8693	0.8134	0.8715	1.0291	0.7407	0.9923	0.5029
0.79742	0.0982552	0.79733	0.173371		128	0.8178	0.8724	0.9405	0.6994	0.8882	0.7349	0.8461	0.7725	0.7937	0.6087		128	0.595	0.7511	0.7947	0.823	0.8044	0.9352	1.0149	0.6851	1.0565	0.5134
0.80151	0.0952235	0.80989	0.210461		129	0.8196	0.8668	0.9541	0.7082	0.817	0.7302	0.8487	0.8729	0.7739	0.6237		129	0.6148	0.6622	0.7624	1.0871	0.8134	0.8501	1.0132	0.675	1.1254	0.4953
0.80396	0.142164	0.82483	0.184161		130	0.8475	0.8969	1.1152	0.7636	0.7815	0.6836	0.8151	0.8105	0.7574	0.5683		130	0.6306	0.7056	0.86	0.9029	0.856	0.8596	1.0539	0.7062	1.1342	0.5393
0.77266	0.0981352	0.83538	0.18154		131	0.7696	0.8485	0.9836	0.7172	0.7623	0.7307	0.783	0.7875	0.746	0.5982		131	0.6514	0.7256	0.9283	0.9201	0.8042	0.8862	1.0006	0.7972	1.138	0.5022
0.79991	0.100946	0.82123	0.173137		132	0.795	0.8053	1.0689	0.7135	0.784	0.7384	0.8118	0.8054	0.7439	0.7329		132	0.65	0.7337	0.8241	0.9122	0.8087	0.921	0.9585	0.783	1.1219	0.4992
0.77967	0.0526	0.79012	0.160567		133	0.7848	0.8163	0.8952	0.7397	0.7381	0.7472	0.7707	0.8148	0.7772	0.7127		133	0.6389	0.74	0.7721	0.9058	0.7721	0.8693	0.9508	0.6929	1.0543	0.505
0.79216	0.0712464	0.83882	0.190177		134	0.7807	0.8628	0.9261	0.7629	0.7185	0.7089	0.8139	0.8064	0.8332	0.7082		134	0.6094	0.8166	0.8878	0.8948	0.8534	0.912	1.0123	0.8026	1.1364	0.4629
0.79739	0.0906523	0.81751	0.153996		135	0.7645	0.8413	0.9672	0.7677	0.7394	0.7577	0.8627	0.8567	0.7879	0.6288		135	0.6393	0.7851	0.8688	0.824	0.804	0.9128	0.9623	0.9597	0.9378	0.4813
0.78779	0.0927744	0.83477	0.155112		136	0.7832	0.8329	1.0038	0.7695	0.7551	0.7498	0.7843	0.8037	0.7665	0.6291		136	0.6484	0.7661	0.9254	0.8688	0.868	0.9472	0.9208	0.8766	1.0226	0.5038
0.79542	0.0988747	0.81541	0.146862		137	0.8044	0.8195	1.0097	0.7646	0.7576	0.7889	0.8033	0.8086	0.799	0.5986		137	0.6313	0.7273	0.8969	0.8527	0.8317	0.9064	0.9265	0.9134	0.9583	0.5096
0.79569	0.0618886	0.83743	0.166268		138	0.8612	0.7946	0.9013	0.8115	0.7525	0.7554	0.788	0.809	0.8096	0.6738		138	0.647	0.8315	1.0176	0.8828	0.8157	1.006	0.8888	0.9557	0.8553	0.4739
0.80748	0.075977	0.82798	0.139417		139	0.8271	0.7821	0.9943	0.8063	0.7549	0.7844	0.7836	0.8328	0.8091	0.7002		139	0.7196	0.8756	0.9637	0.8367	0.8797	0.968	0.8484	0.8614	0.8428	0.4839
0.8172	0.066604	0.84261	0.160398		140	0.8205	0.787	0.9254	0.7891	0.7529	0.8924	0.814	0.8907	0.7837	0.7163		140	0.7037	0.8799	0.9268	0.8941	0.8343	1.1226	0.8465	0.8351	0.8877	0.4954
0.827	0.0776679	0.80768	0.128539		141	0.8913	0.8581	0.8983	0.7861	0.7344	0.8542	0.8101	0.9337	0.8232	0.6806		141	0.6605	0.8304	0.9051	0.865	0.834	0.9336	0.866	0.8382	0.8394	0.5046
0.80982	0.0716011	0.84483	0.149602		142	0.8742	0.7721	0.8819	0.8506	0.6816	0.8188	0.8496	0.8399	0.8377	0.6918		142	0.7181	0.8597	0.9482	0.9071	0.8464	0.9997	0.9075	0.9193	0.8671	0.4752
0.79677	0.0553611	0.85242	0.144766		143	0.8088	0.7276	0.8891	0.7675	0.7208	0.8438	0.8069	0.844	0.814	0.7452		143	0.7632	0.8414	0.9625	0.9647	0.8742	0.9856	0.8594	0.9071	0.8795	0.4866
0.8206	0.080987	0.84671	0.157983		144	0.8051	0.7138	0.9327	0.7988	0.7865	0.7853	0.8335	0.9494	0.8852	0.7157		144	0.7282	0.8051	1.0188	0.9355	0.8114	0.966	0.8963	0.9261	0.9111	0.4686
0.80288	0.074088	0.84439	0.160602		145	0.7963	0.7568	0.9169	0.7738	0.7348	0.7649	0.7916	0.931	0.8515	0.7112		145	0.7413	0.7828	1.1244	0.8703	0.809	0.8855	0.8968	0.9615	0.8721	0.5002
0.82585	0.095708	0.84586	0.141732		146	0.8451	0.7973	0.8897	0.7711	0.6846	0.8185	0.7783	1.0423	0.8651	0.7665		146	0.7357	0.8828	1.0571	0.8504	0.8014	0.8582	0.9659	0.8726	0.9074	0.5271
0.84316	0.0935968	0.85263	0.136738		147	0.8851	0.8192	0.9676	0.76	0.7178	0.7673	0.8327	1.0066	0.8913	0.784		147	0.7737	0.9311	1.0677	0.8507	0.8068	0.8656	0.9241	0.9377	0.8231	0.5458
0.81991	0.0810799	0.85428	0.141776		148	0.8263	0.7988	0.9889	0.8141	0.6943	0.7726	0.7972	0.9104	0.8331	0.7634		148	0.8216	0.8761	1.0479	0.8534	0.808	0.8765	0.8842	0.8911	0.9784	0.5056
0.8085	0.076212	0.85489	0.136207		149	0.8536	0.8545	0.9133	0.7669	0.6828	0.7483	0.7955	0.917	0.8082	0.7449		149	0.7349	0.8018	1.1138	0.8418	0.7983	0.8604	0.8549	0.9137	1.0052	0.6241
0.78773	0.0734318	0.85125	0.147098		150	0.8062	0.8214	0.8885	0.7264	0.6746	0.7616	0.8522	0.8824	0.7448	0.7192		150	0.7716	0.8584	0.9625	0.9685	0.7797	0.8176	0.8867	0.8693	1.072	0.5262
0.77839	0.083618	0.88847	0.222738		151	0.8234	0.7575	0.8562	0.7155	0.6487	0.8082	0.866	0.8892	0.7504	0.6688		151	0.7314	0.7943	1.0276	1.0296	0.8054	0.8602	0.8547	0.9538	1.3377	0.49
0.779	0.083108	0.83422	0.16676		152	0.8259	0.7878	0.9348	0.7307	0.6553	0.8179	0.7867	0.839	0.7386	0.6733		152	0.7256	0.7951	0.9135	0.9235	0.7918	0.8573	0.8542	0.8228	1.1607	0.4977
0.79294	0.0760528	0.84465	0.164954		153	0.8307	0.8039	0.9113	0.8139	0.686	0.7896	0.8397	0.8587	0.6983	0.6973		153	0.7507	0.7851	1.0902	0.8609	0.7909	0.886	0.8744	0.8808	1.0395	0.488
0.79498	0.0744901	0.862	0.161899		154	0.8778	0.7511	0.8515	0.8737	0.7204	0.8228	0.8098	0.8524	0.6637	0.7266		154	0.7649	0.8049	1.033	0.9478	0.8111	0.8959	0.9137	0.9384	1.0304	0.4799
0.78754	0.0758572	0.83653	0.150691		155	0.8683	0.6821	0.8985	0.7856	0.6988	0.8258	0.8361	0.815	0.6917	0.7735		155	0.7791	0.768	1.0818	0.8688	0.8188	0.8526	0.9006	0.8692	0.9357	0.4907
0.80727	0.0975272	0.82488	0.144217		156	0.9141	0.7197	0.9959	0.8383	0.7224	0.755	0.7846	0.8885	0.7333	0.7209		156	0.7767	0.8265	0.9594	0.8153	0.7962	0.7918	0.9115	0.8406	1.0392	0.4916
0.81744	0.107328	0.83492	0.170005		157	0.9385	0.7397	1.0073	0.8248	0.7108	0.8976	0.7674	0.8711	0.7092	0.708		157	0.7712	0.7573	1.1079	0.8907	0.8224	0.8045	0.9142	0.8474	0.9785	0.4551
0.8242	0.100703	0.84235	0.167453		158	0.9336	0.7246	0.993	0.8457	0.7222	0.859	0.8143	0.9088	0.7222	0.7186		158	0.7128	0.8078	1.064	0.8851	0.8231	0.8255	0.8285	0.9383	1.0544	0.484
0.82624	0.0955755	0.85075	0.173121		159	0.8659	0.7762	0.92	0.8207	0.7452	0.8152	0.7833	1.0447	0.7406	0.7506		159	0.745	0.7924	1.0988	0.8857	0.8145	0.8463	0.865	0.9983	0.9956	0.4659
0.80815	0.085407	0.837	0.15261		160	0.8237	0.7851	0.9526	0.7566	0.8377	0.7839	0.8079	0.932	0.6728	0.7292		160	0.7211	0.7549	1.0158	0.9106	0.8321	0.9463	0.8514	0.9204	0.9323	0.4851
0.82929	0.0808531	0.84771	0.191658		161	0.8296	0.7938	0.8831	0.8586	0.9304	0.8907	0.765	0.9137	0.6825	0.7455		161	0.7552	0.7915	1.2865	0.8804	0.8232	0.8699	0.8053	0.8985	0.8646	0.502
0.82914	0.0751276	0.85235	0.190045		162	0.7781	0.8185	0.8562	0.8845	0.8967	0.8808	0.7664	0.9455	0.7119	0.7528		162	0.7746	0.8144	1.2878	0.9512	0.8324	0.8017	0.8306	0.8056	0.9043	0.5209
0.80552	0.0760419	0.85671	0.196023		163	0.8032	0.7658	0.9557	0.7943	0.7812	0.8281	0.8163	0.8932	0.7008	0.7166		163	0.7704	0.8087	1.2702	0.9237	0.8474	0.827	0.8666	0.8053	0.9705	0.4773
0.81388	0.0862364	0.83605	0.155446		164	0.8763	0.7079	0.9561	0.8509	0.8029	0.8285	0.8539	0.8618	0.7089	0.6916		164	0.736	0.8519	1.109	0.8916	0.794	0.8439	0.8002	0.8875	0.945	0.5014
0.83767	0.1008	0.86565	0.152874		165	0.8791	0.7326	0.9247	0.7907	0.755	0.8851	0.915	1.0202	0.7245	0.7498		165	0.7554	0.917	1.0206	1.027	0.8027	0.9023	0.8659	0.9512	0.9105	0.5039
0.79129	0.0667873	0.84958	0.149469		166	0.9065	0.7512	0.9093	0.7642	0.7428	0.7604	0.7835	0.8233	0.7416	0.7301		166	0.7297	0.9712	1.0749	0.9293	0.8203	0.8308	0.85	0.8787	0.8941	0.5168
0.80863	0.0656956	0.87772	0.168205		167	0.8565	0.8395	0.9277	0.8589	0.7479	0.7899	0.7648	0.8385	0.7377	0.7249		167	0.795	1.0482	1.0971	0.9909	0.8414	0.8184	0.8387	0.8238	1.0085	0.5152
0.81792	0.0720241	0.86651	0.162301		168	0.7985	0.7871	0.858	0.9652	0.8211	0.8268	0.778	0.8832	0.7096	0.7517		168	0.7454	0.9311	1.0992	1.0273	0.8088	0.8374	0.8434	0.8881	0.9682	0.5162
0.80958	0.0685787	0.85951	0.145338		169	0.8024	0.7685	0.8973	0.8887	0.7809	0.8122	0.8122	0.9011	0.7159	0.7166		169	0.7988	0.8918	1.106	0.902	0.8037	0.8685	0.8552	0.8903	0.9513	0.5275
0.82432	0.0714766	0.88792	0.155777		170	0.8141	0.7815	0.954	0.8468	0.7782	0.8361	0.8557	0.9062	0.7139	0.7567		170	0.8183	0.9518	1.1314	0.8851	0.8276	0.8586	0.9233	1.0027	0.9495	0.5309
0.8394	0.0857912	0.89778	0.182369		171	0.8359	0.8078	0.994	0.8672	0.8237	0.8466	0.9339	0.8477	0.6864	0.7508		171	0.7247	0.9668	1.0964	0.9533	0.8248	0.8466	0.9447	1.039	1.0815	0.5
0.83899	0.0870127	0.94866	0.207584		172	0.8413	0.8179	1.0056	0.8688	0.7711	0.8351	0.9298	0.8663	0.7139	0.7401		172	0.7813	1.0067	1.1232	1.3062	0.83	0.8787	0.9628	0.9678	1.0822	0.5477
0.82218	0.0796742	0.95408	0.230104		173	0.8241	0.7913	0.9279	0.8751	0.8911	0.8244	0.8085	0.8903	0.6903	0.6988		173	0.7855	1.1008	1.4033	1.0534	0.8013	0.9138	0.9432	0.8877	1.1021	0.5497
0.81636	0.0928314	0.87741	0.189893		174	0.7705	0.8676	0.9473	0.8438	0.7713	0.8474	0.7748	0.956	0.691	0.6939		174	0.7883	1.0228	1.2746	0.8744	0.8484	0.8379	0.8943	0.8902	0.8299	0.5133
0.83116	0.08153	0.87827	0.192301		175	0.7795	0.8466	0.9994	0.8588	0.8392	0.7812	0.8637	0.8865	0.7247	0.732		175	0.771	1.1792	1.1617	0.8711	0.8284	0.8532	0.9397	0.8336	0.8408	0.504
0.83163	0.0804875	0.87257	0.175252		176	0.7453	0.8206	0.9302	0.9004	0.8832	0.7692	0.8389	0.9462	0.7505	0.7318		176	0.8013	1.1095	1.1615	0.8603	0.7848	0.8699	0.8803	0.8756	0.8616	0.5209
0.82349	0.0734719	0.88781	0.17286		177	0.7382	0.8369	0.8797	0.8804	0.8811	0.925	0.8316	0.8198	0.7266	0.7156		177	0.7709	1.1234	1.1787	0.9222	0.829	0.8167	0.8839	0.9434	0.8381	0.5718
0.83942	0.105241	0.90087	0.186959		178	0.7376	0.8098	0.9573	0.9687	0.8158	0.9137	0.8209	0.961	0.6919	0.7175		178	0.7273	1.1547	1.133	1.06	0.8301	0.8663	0.9003	0.9425	0.8553	0.5392
0.8317	0.0991205	0.91507	0.20439		179	0.711	0.7761	0.9643	0.9125	0.8962	0.9464	0.7985	0.8718	0.7494	0.6908		179	0.7146	1.1835	1.2137	0.8674	0.815	0.8761	0.9418	1.0591	0.937	0.5425
0.82393	0.0969113	0.93022	0.231135		180	0.7501	0.7144	0.9528	0.7639	0.8449	1.0043	0.8389	0.8549	0.7134	0.8017		180	0.8061	0.9962	1.2748	0.9179	0.8458	0.838	0.8773	1.2667	1.0023	0.4771
0.8232	0.0819522	0.87071	0.156321		181	0.7444	0.7539	0.9033	0.8468	0.8072	0.9523	0.8118	0.9284	0.7181	0.7658		181	0.7917	0.9424	1.0456	0.9655	0.8293	0.8508	0.9016	0.9886	0.9089	0.4827
0.83077	0.0762425	0.84011	0.15164		182	0.7974	0.791	0.9118	0.8381	0.8957	0.9536	0.8367	0.8263	0.6915	0.7656		182	0.8103	1.0212	1.0168	0.9318	0.819	0.8029	0.8551	0.8676	0.7952	0.4812
0.83624	0.0914678	0.83798	0.160976		183	0.7318	0.8358	0.8793	0.9016	0.9832	0.912	0.8226	0.8638	0.74	0.6923		183	0.7421	1.0824	1.0413	0.8409	0.8169	0.8307	0.8989	0.8388	0.7912	0.4966
0.8509	0.123469	0.84822	0.169758		184	0.8004	0.6967	1.0785	0.9094	0.9942	0.7965	0.818	0.9155	0.6929	0.8069		184	0.7537	1.0674	1.1022	0.9218	0.8207	0.8258	0.8894	0.7612	0.8409	0.4991
0.8545	0.100959	0.85695	0.160068		185	0.7552	0.7082	1.0046	0.9215	0.9233	0.9114	0.8593	0.936	0.7313	0.7942		185	0.7553	0.9963	1.1462	0.9751	0.7914	0.8831	0.8797	0.8216	0.7584	0.5624
0.81928	0.0795405	0.88244	0.175326		186	0.7707	0.7577	0.9755	0.8117	0.8612	0.8568	0.8292	0.8624	0.6764	0.7912		186	0.7654	1.0274	1.2098	0.9529	0.8527	0.8701	0.9094	0.8882	0.818	0.5305
0.81504	0.0776774	0.8907	0.178941		187	0.7929	0.8038	0.93	0.776	0.7422	0.9326	0.8127	0.8613	0.6821	0.8168		187	0.7394	0.9845	1.2369	0.9509	0.843	0.9196	0.897	0.9141	0.8905	0.5311
0.83939	0.0560254	0.88121	0.181793		188	0.7879	0.807	0.8875	0.8686	0.8718	0.9066	0.8343	0.8455	0.7171	0.8676		188	0.8181	1.0002	1.2042	0.9552	0.8236	0.8577	0.898	0.8417	0.9335	0.4799
0.81348	0.0721919	0.86903	0.161153		189	0.7593	0.7056	0.9071	0.8359	0.9235	0.7981	0.797	0.8839	0.7514	0.773		189	0.799	0.9673	1.1023	0.9154	0.8266	0.9027	0.9056	0.922	0.8747	0.4747
0.8161	0.0980251	0.86294	0.152955		190	0.6961	0.6842	0.9313	0.9537	0.8815	0.8395	0.8301	0.8777	0.7329	0.734		190	0.7975	0.8948	1.0828	0.938	0.8153	0.8602	0.8997	1.0099	0.8208	0.5104
0.83354	0.0981489	0.86162	0.182781		191	0.7584	0.7687	1.0229	0.8703	0.8555	0.7803	0.8264	0.9694	0.7637	0.7198		191	0.8172	0.9626	1.2405	0.864	0.8036	0.8658	0.8538	0.8949	0.8251	0.4887
0.80761	0.0692987	0.88886	0.200582		192	0.7464	0.7313	0.9022	0.8481	0.897	0.8211	0.7905	0.866	0.7607	0.7128		192	0.8564	0.9729	1.3164	0.8674	0.8268	0.8586	0.9324	0.9642	0.7902	0.5033
0.82403	0.0794083	0.87704	0.212563		193	0.7375	0.7324	0.9897	0.8574	0.814	0.8673	0.8221	0.8824	0.7889	0.7486		193	0.8139	0.8963	1.3509	0.8331	0.7889	0.934	0.9261	0.9007	0.8509	0.4756
0.82742	0.0971951	0.90563	0.203361		194	0.7298	0.765	0.9919	0.9614	0.8499	0.8421	0.7611	0.8989	0.7332	0.7409		194	0.8414	0.9541	1.2733	0.9255	0.8361	0.824	0.9528	1.0953	0.8716	0.4822
0.81397	0.0721973	0.86684	0.180969		195	0.7382	0.7549	0.9139	0.9099	0.8842	0.8077	0.7972	0.8495	0.7134	0.7708		195	0.8028	0.8955	1.2344	0.9135	0.8616	0.8814	0.8818	0.7178	0.9607	0.5189
0.83217	0.0793135	0.85479	0.224447		196	0.7876	0.7273	0.9682	0.9033	0.8327	0.8776	0.749	0.9105	0.777	0.7885		196	0.7991	0.8891	1.3717	0.9485	0.8224	0.8496	0.8624	0.653	0.8596	0.4925
0.84674	0.12263	0.87785	0.247891		197	0.7485	0.7743	1.1463	0.9379	0.7872	0.8868	0.8138	0.8489	0.7323	0.7914		197	0.7961	0.9422	1.4807	0.9221	0.8448	0.9033	0.8138	0.6985	0.8717	0.5053
0.86852	0.0964233	0.87007	0.250481		198	0.7454	0.8168	1.0448	0.9175	0.8769	0.902	0.8143	0.874	0.73	0.9635		198	0.7498	0.9276	1.4581	0.9921	0.8164	0.8818	0.8777	0.6778	0.8295	0.4899
0.85859	0.0786884	0.84095	0.174957		199	0.7606	0.7446	0.9604	0.9141	0.9318	0.8752	0.8363	0.8287	0.788	0.9462		199	0.7636	0.8867	1.1759	0.9555	0.813	0.8674	0.9243	0.7154	0.8086	0.4991
0.8592	0.0775923	0.85787	0.170639		200	0.7881	0.7598	1.0197	0.8627	0.9234	0.8865	0.8367	0.9051	0.8128	0.7972		200	0.8156	0.9192	1.1951	0.8912	0.8239	0.9005	0.9001	0.7489	0.8793	0.5049
0.86866	0.0843989	0.87865	0.227993		201	0.7794	0.8239	1.0081	0.9567	0.9117	0.9022	0.818	0.9337	0.7855	0.7674		201	0.7649	1.0086	1.3798	0.8965	0.8617	0.9399	0.8686	0.6737	0.8887	0.5041
0.87789	0.0906977	0.83962	0.181847		202	0.784	0.8695	1.0553	0.9296	0.9502	0.8848	0.865	0.9024	0.7439	0.7942		202	0.7181	0.9918	1.1677	0.892	0.793	0.9528	0.866	0.6995	0.8122	0.5031
0.82506	0.0909564	0.86595	0.224543		203	0.7819	0.7801	1.0203	0.8385	0.8081	0.8755	0.8181	0.8965	0.7302	0.7014		203	0.714	1.0681	1.3153	0.9604	0.7963	0.862	0.9696	0.6922	0.7669	0.5147
0.84172	0.0781992	0.88267	0.224813		204	0.7435	0.7982	0.9753	0.8623	0.8371	0.9181	0.795	0.9335	0.7627	0.7915		204	0.7558	1.0304	1.3717	0.9111	0.8186	0.9612	0.9199	0.7185	0.8242	0.5153
0.81012	0.0643144	0.85349	0.156015		205	0.7228	0.8051	0.944	0.8867	0.799	0.836	0.7855	0.7913	0.7612	0.7696		205	0.7554	0.9519	1.0856	0.8777	0.8607	0.9764	0.9238	0.7566	0.833	0.5138
0.81085	0.086126	0.84963	0.176807		206	0.754	0.7203	0.9721	0.8062	0.8474	0.8666	0.7598	0.9116	0.7536	0.7169		206	0.7446	1.0285	1.0612	1.0403	0.8103	0.8506	0.9768	0.6966	0.7687	0.5187
0.81077	0.097263	0.8559	0.189924		207	0.7735	0.7744	1.0231	0.7557	0.8415	0.8748	0.7983	0.8653	0.7309	0.6702		207	0.7389	1.0008	1.1683	0.8632	0.8387	0.8755	1.0586	0.6664	0.8303	0.5183
0.82057	0.0940438	0.8665	0.178836		208	0.7236	0.752	1.0379	0.7551	0.8545	0.8825	0.8429	0.8109	0.8173	0.729		208	0.8194	1.0664	1.1305	0.9414	0.8181	0.8605	0.9854	0.7001	0.83	0.5132
0.82508	0.112397	0.88278	0.212011		209	0.7477	0.7721	1.108	0.7443	0.816	0.8687	0.873	0.7595	0.8347	0.7268		209	0.778	1.1211	1.2494	1.0331	0.8251	0.8454	0.905	0.7476	0.8324	0.4907
0.82641	0.126506	0.87009	0.181626		210	0.7738	0.7734	1.1136	0.882	0.7355	0.8473	0.802	0.8571	0.8572	0.6222		210	0.7172	1.0627	1.1341	1.017	0.8187	0.8723	0.9869	0.7122	0.8295	0.5503
0.82416	0.107862	0.89268	0.183094		211	0.7682	0.7777	1.0173	0.9363	0.7439	0.899	0.7487	0.822	0.8752	0.6533		211	0.7767	1.0234	1.0866	0.9862	0.8564	0.8954	1.1591	0.7395	0.8693	0.5342
0.85059	0.0935216	0.86239	0.171257		212	0.7696	0.7937	1.0418	0.8508	0.8441	0.9082	0.8138	0.8421	0.9345	0.7073		212	0.7992	0.993	1.1343	0.9252	0.8515	0.88	0.9723	0.7255	0.8459	0.497
0.86346	0.109297	0.84772	0.163913		213	0.7754	0.7293	1.1166	0.8816	0.8552	0.88	0.7394	0.8911	0.8763	0.8897		213	0.728	1.0237	0.9979	0.8914	0.8782	0.8823	1.0131	0.6942	0.8652	0.5032
0.85699	0.0951025	0.87832	0.188303		214	0.8064	0.7313	1.0663	0.8533	0.9141	0.9089	0.7507	0.8204	0.8417	0.8768		214	0.8093	1.0692	1.1199	0.9957	0.7823	0.8745	1.0067	0.6921	0.9326	0.5009
0.87487	0.118485	0.87862	0.181942		215	0.7861	0.7516	1.1366	0.8606	0.9682	0.9427	0.7368	0.8743	0.8299	0.8619		215	0.7117	0.942	1.1131	1.0503	0.8229	0.8615	1.0443	0.7279	0.9777	0.5348
