# Supplementary material for: Hypoxia controls plasma membrane targeting of polarity proteins by dynamic turnover of PI4P and PI(4,5)P2
Source: eLife. 2022 Jun 9;11:e79582. doi: 10.7554/eLife.79582 (PMC9242647; doi:10.7554/eLife.79582)
Supplement: Figure 5—source data 2. [file elife-79582-fig5-data2.xlsx]

## Sheet: Figure 5A-PLC-PH
Figure 5 Souce Data 2
						1	2	3	4	5	6	7	8	9	10	11	12	13	14	15	16	17	18	19	20			1	2	3	4	5	6	7	8	9	10	11	12	13	14	15	16	17	18	19	20
WT		RNAi			WT																						RNAi
AVG	STDEV	AVG	STDEV
t_C1_PM/Cy	t_C1_PM/Cy	t_C1_PM/Cy	t_C1_PM/Cy		min	t_C1_PM/Cy	t_C1_PM/Cy	t_C1_PM/Cy	t_C1_PM/Cy	t_C1_PM/Cy	t_C1_PM/Cy	t_C1_PM/Cy	t_C1_PM/Cy	t_C1_PM/Cy	t_C1_PM/Cy	t_C1_PM/Cy	t_C1_PM/Cy	t_C1_PM/Cy	t_C1_PM/Cy	t_C1_PM/Cy	t_C1_PM/Cy	t_C1_PM/Cy	t_C1_PM/Cy	t_C1_PM/Cy	t_C1_PM/Cy		min	t_C1_PM/Cy	t_C1_PM/Cy	t_C1_PM/Cy	t_C1_PM/Cy	t_C1_PM/Cy	t_C1_PM/Cy	t_C1_PM/Cy	t_C1_PM/Cy	t_C1_PM/Cy	t_C1_PM/Cy	t_C1_PM/Cy	t_C1_PM/Cy	t_C1_PM/Cy	t_C1_PM/Cy	t_C1_PM/Cy	t_C1_PM/Cy	t_C1_PM/Cy	t_C1_PM/Cy	t_C1_PM/Cy	t_C1_PM/Cy
1.0725	0.023443	1.05869	0.0171486		1	1.0651	1.0817	1.1147	1.0673	1.0666	1.059	1.0461	1.0792	1.0204	1.0696	1.0422	1.05	1.1078	1.09	1.0943	1.0789	1.0983	1.0533	1.0766	1.0889		1	1.0597	1.0619	1.0928	1.0659	1.0523	1.035	1.0872	1.0607	1.0244	1.0617	1.0408	1.0692	1.0513	1.0558	1.0719	1.0331	1.051	1.0666	1.0762	1.0563
0.969445	0.0186369	0.969225	0.0154193		2	0.9759	0.953	0.9559	0.974	0.9635	0.9779	0.9668	0.972	1.0225	0.9694	0.9662	0.9749	0.9442	0.9635	0.9477	1.0093	0.9691	0.968	0.9642	0.9509		2	0.9288	0.9732	0.9702	0.9893	0.962	0.996	0.9506	0.9792	0.9611	0.9661	0.9643	0.9559	0.9779	0.957	0.9639	0.9823	0.9831	0.962	0.9767	0.9849
0.95807	0.0190001	0.97206	0.0200309		3	0.959	0.9654	0.9293	0.9587	0.9698	0.9631	0.9872	0.9489	0.9571	0.961	0.9916	0.9751	0.948	0.9465	0.958	0.9118	0.9326	0.9787	0.9593	0.9603		3	1.0114	0.965	0.937	0.9447	0.9857	0.969	0.9622	0.96	1.0144	0.9722	0.9949	0.9748	0.9708	0.9872	0.9642	0.9846	0.9658	0.9714	0.9471	0.9588
0.955205	0.0302421	0.97938	0.042392		4	0.8971	0.9572	0.9734	0.9343	0.9557	0.9699	0.9751	0.958	0.9277	1.0206	1.0065	0.9513	0.9242	0.9251	0.9974	0.9328	0.9544	0.9662	0.9313	0.9459		4	0.9712	0.925	0.9915	1.01	1.0353	1.0205	0.9355	0.9589	1.0583	0.9039	1.0029	1.0092	0.9781	1.0344	0.96	0.9971	0.9659	0.9755	0.9187	0.9357
0.967305	0.0305331	0.97282	0.0387021		5	0.8667	0.9853	0.9626	0.9853	0.9937	0.9987	0.992	0.9637	0.9432	1.0053	0.9827	0.9695	0.9516	0.9496	0.9845	0.9645	0.9712	0.9875	0.9448	0.9437		5	1.0085	0.9451	0.989	0.9958	1.0327	0.9557	0.9473	0.9811	1.0329	0.9335	0.9483	1.0166	0.9456	0.9453	1.0259	0.953	1.0104	0.9418	0.8966	0.9513
0.966235	0.036185	0.9778	0.0394053		6	0.9105	1.0047	0.9821	1.0005	0.9729	0.9657	1.0128	0.9357	0.9035	0.9804	0.9982	0.9336	0.9133	0.9548	1.0254	0.9629	0.9693	0.9987	0.9229	0.9768		6	1.0051	0.9705	1.0568	0.9511	1.0006	0.9354	0.9644	0.9732	1.0485	0.9758	0.9937	1.0208	0.9183	0.9235	1.0059	0.971	1.004	0.9684	0.9227	0.9463
0.97499	0.0408128	0.96424	0.0475001		7	0.9869	0.9781	1.0238	1.0383	0.953	1.0376	1.0243	0.959	0.9263	1.0211	0.9769	0.9636	0.905	0.984	1.0072	0.9211	0.9577	0.9682	0.9147	0.953		7	0.9568	0.9672	1.0302	0.9	0.9965	0.9578	0.9699	0.9259	1.047	0.9753	0.9745	0.9387	0.8575	0.9437	1.0236	0.928	1.0414	0.9294	0.9699	0.9515
0.980605	0.0567611	0.967465	0.0546211		8	0.9799	1.0708	1.057	0.9892	0.9564	1.0598	0.9998	0.9403	0.9558	1.0928	1.0304	0.987	0.8898	0.9301	0.9895	0.9124	0.9506	0.9691	0.924	0.9274		8	0.9603	0.9093	0.9971	0.9225	1.0693	0.9435	1.0272	0.8978	1.0632	0.9676	0.9602	0.9505	0.9227	0.9769	0.9966	0.9404	1.075	0.9186	0.9131	0.9375
0.960945	0.0464338	0.96634	0.0400468		9	0.9037	0.9405	1.0048	1.016	0.9478	1.0661	1.0303	0.9681	0.9165	0.9746	1.0102	0.9642	0.8711	0.9428	0.945	0.9112	0.9448	0.947	0.9547	0.9595		9	1.019	0.9403	0.953	0.9417	0.988	0.9158	0.9762	0.9373	1.0468	0.9531	0.9837	0.931	0.9845	0.9571	0.9859	0.9574	1.063	0.9346	0.9357	0.9227
0.9648	0.0463518	0.960425	0.0431719		10	0.9012	0.9549	0.991	0.9887	0.9793	1.0826	0.9901	0.9795	0.889	0.9771	1.0204	0.9902	0.9146	0.9498	1.0036	0.9191	0.9003	0.9604	0.9533	0.9509		10	0.9819	0.9421	0.9518	0.9358	0.9653	0.9061	0.9713	0.9527	1.0057	0.938	0.9566	0.9702	0.993	0.9739	1.0208	0.9616	1.0656	0.8601	0.9278	0.9282
0.97194	0.0361302	0.957045	0.0506706		11	0.938	0.9917	1.0135	0.9852	0.9639	1.0057	0.9904	0.999	0.8831	1.0378	0.988	0.9813	0.9084	0.9672	0.9946	0.97	0.9597	0.9766	0.9438	0.9409		11	0.956	0.9663	1.0124	0.9847	0.998	0.918	0.9578	0.955	1.018	0.9531	0.8757	0.9255	0.9769	0.917	1.0208	0.9245	1.0718	0.8787	0.901	0.9297
0.962085	0.0400612	0.948165	0.0445885		12	0.9162	0.972	1.0569	0.9304	0.9586	0.9769	1.0202	0.9691	0.9017	1.0232	1.0001	0.9674	0.9166	0.9541	0.9729	0.9405	0.9669	0.9473	0.9174	0.9333		12	0.9527	0.9561	1.0135	0.9463	1.0103	0.8818	0.9321	0.9468	1.0185	0.9224	0.8936	0.8962	0.9094	0.9263	1.0036	0.9585	1.0238	0.9277	0.9004	0.9433
0.967125	0.040952	0.931305	0.0484174		13	0.938	1.0051	1.0659	0.9298	0.9663	0.9884	0.9704	1.012	0.9245	1.0336	0.9818	0.9492	0.9041	0.9559	0.9916	0.9167	0.9285	0.9671	0.9675	0.9461		13	0.9375	0.9798	0.9863	0.9543	0.9885	0.8996	0.9787	0.8898	0.9904	0.9032	0.8621	0.874	0.9014	0.9073	0.9661	0.9087	1.0237	0.8967	0.8617	0.9163
0.94935	0.0383732	0.92074	0.0457346		14	0.9095	0.9106	0.9986	0.9285	0.9519	0.9777	0.9419	0.9623	0.9282	1.039	0.9992	0.9982	0.8999	0.9101	0.961	0.9321	0.905	0.9592	0.9164	0.9577		14	0.9132	0.9589	0.932	0.9222	0.9773	0.8752	1.0159	0.9036	0.9956	0.9347	0.863	0.8687	0.8901	0.8783	0.9423	0.9114	0.9727	0.8521	0.8904	0.9172
0.94254	0.0348077	0.9252	0.0440636		15	0.9236	0.8867	0.9784	0.9719	0.9473	0.9809	0.9439	0.9036	0.9087	1.0141	0.9719	0.9932	0.9001	0.9129	0.9381	0.9083	0.9277	0.9402	0.934	0.9653		15	0.9595	0.9272	0.9559	0.9488	1.0069	0.9066	0.967	0.9051	0.99	0.8763	0.8763	0.8911	0.8901	0.9383	0.89	0.916	0.9918	0.8433	0.8936	0.9302
0.942635	0.0336848	0.913055	0.0492138		16	0.9255	0.9096	0.9261	0.9395	0.9479	0.9874	0.9263	0.9429	0.9058	1.0242	0.9791	0.9516	0.9006	0.9309	0.9533	0.8764	0.9338	0.9786	0.955	0.9582		16	0.9703	0.9408	0.9577	0.9429	1.0126	0.8667	0.9365	0.8927	0.9832	0.8783	0.8513	0.8533	0.8579	0.8913	0.8892	0.9132	0.9632	0.8422	0.8877	0.9301
0.94365	0.0334676	0.90196	0.057993		17	0.9011	0.9122	0.9497	0.9589	0.9398	1.007	0.9019	0.9417	0.9414	0.9895	0.9734	0.9205	0.9117	0.9201	0.9918	0.9115	0.9603	0.9947	0.912	0.9338		17	1.0006	0.9551	0.9125	0.9176	1.0067	0.8203	0.953	0.8705	0.9533	0.8719	0.8901	0.8454	0.8256	0.8585	0.8846	0.9019	0.9895	0.8388	0.8455	0.8978
0.932315	0.0331727	0.88567	0.0525595		18	0.8827	0.8995	0.9722	0.9841	0.9432	0.9456	0.9189	0.9156	0.8955	1.0005	0.9562	0.9584	0.921	0.8931	0.9439	0.9003	0.9405	0.9565	0.8927	0.9259		18	0.9403	0.9262	0.8894	0.889	0.9736	0.8263	0.9529	0.857	0.9543	0.8329	0.8624	0.8027	0.8686	0.8535	0.8975	0.8644	0.9671	0.8235	0.8264	0.9054
0.931285	0.0445303	0.87353	0.0515716		19	0.8801	0.8551	0.9966	0.9599	0.9436	0.9422	0.9174	0.9155	0.8794	1.0489	0.9553	0.9671	0.8961	0.9357	0.9352	0.8878	0.92	0.9629	0.905	0.9219		19	0.9283	0.9176	0.8959	0.8819	0.933	0.8057	0.9556	0.87	0.9204	0.8092	0.8378	0.7993	0.8323	0.8349	0.8958	0.8501	0.9694	0.8273	0.8356	0.8705
0.932055	0.0422325	0.865325	0.0591859		20	0.8755	0.903	1.0134	0.9428	0.9353	0.9854	0.926	0.9356	0.8904	1.0272	0.9201	0.9222	0.8753	0.8896	0.9461	0.9224	0.9288	0.9844	0.9047	0.9129		20	0.9236	0.8677	0.9081	0.9249	0.9394	0.8155	0.9488	0.8519	0.9024	0.7992	0.8072	0.8174	0.8082	0.7926	0.8769	0.8308	0.991	0.7975	0.8345	0.8689
0.91674	0.0359196	0.84524	0.06051		21	0.8765	0.8884	0.9603	0.9258	0.9202	0.961	0.8828	0.9098	0.8706	0.9574	0.9607	0.8674	0.8707	0.8882	0.9345	0.9267	0.9427	0.9832	0.9075	0.9004		21	0.915	0.8722	0.8725	0.8626	0.9498	0.7872	0.9321	0.842	0.8738	0.7697	0.7981	0.7983	0.7795	0.7929	0.8289	0.8065	0.969	0.7819	0.8063	0.8665
0.902215	0.0326074	0.8421	0.062322		22	0.8794	0.8701	0.9359	0.8942	0.8932	0.9277	0.8653	0.8828	0.8425	0.9293	0.9166	0.9069	0.8758	0.9	0.8979	0.9171	0.9342	0.993	0.8903	0.8921		22	0.9116	0.8738	0.8652	0.8806	0.9212	0.7784	0.9684	0.8366	0.8638	0.7643	0.7799	0.7997	0.7826	0.7815	0.8381	0.7981	0.9628	0.7887	0.8141	0.8326
0.89294	0.0394362	0.839685	0.070034		23	0.8516	0.8749	0.9448	0.8975	0.8891	0.9408	0.88	0.8673	0.8099	0.9511	0.9072	0.8655	0.8473	0.8823	0.8675	0.8915	0.9249	0.9738	0.893	0.8988		23	0.9058	0.8623	0.8517	0.9045	0.9642	0.7578	0.9733	0.8269	0.8378	0.7588	0.7768	0.7842	0.7852	0.7853	0.84	0.7947	0.972	0.7862	0.7985	0.8277
0.881445	0.0401432	0.822305	0.065332		24	0.8353	0.8534	0.9058	0.8995	0.8899	0.9354	0.8659	0.8488	0.8139	0.9102	0.8752	0.8523	0.8382	0.8618	0.8916	0.8625	0.9495	0.9756	0.8822	0.8819		24	0.8806	0.8397	0.8445	0.8342	0.9478	0.7466	0.9535	0.7915	0.8398	0.7499	0.7781	0.7778	0.7607	0.767	0.8253	0.7685	0.9438	0.7697	0.8036	0.8235
0.87489	0.040038	0.821185	0.0630324		25	0.8491	0.8547	0.9565	0.8817	0.8657	0.9251	0.8155	0.8351	0.8323	0.8684	0.8718	0.8224	0.8379	0.878	0.8912	0.8687	0.9279	0.9501	0.8771	0.8886		25	0.895	0.8475	0.8154	0.8386	0.9292	0.7385	0.9385	0.7982	0.8392	0.7478	0.7634	0.792	0.7782	0.7682	0.8397	0.7543	0.9358	0.7707	0.7931	0.8404
0.865065	0.0422189	0.815315	0.0560684		26	0.8476	0.8501	0.9202	0.8712	0.8644	0.935	0.8033	0.8144	0.8318	0.8651	0.8267	0.8121	0.838	0.8423	0.8736	0.8567	0.9575	0.9159	0.8824	0.893		26	0.9021	0.8328	0.8314	0.8499	0.9057	0.7397	0.928	0.7916	0.8091	0.7439	0.7731	0.7761	0.7941	0.7568	0.8295	0.7564	0.8865	0.7712	0.8026	0.8258
0.856405	0.0434746	0.812085	0.0615844		27	0.8508	0.8289	0.8883	0.8391	0.8279	0.913	0.7991	0.8149	0.8013	0.8506	0.8099	0.8328	0.8551	0.8384	0.876	0.8825	0.95	0.9487	0.8483	0.8725		27	0.9046	0.8127	0.8348	0.8427	0.9352	0.7304	0.9266	0.7999	0.8172	0.7391	0.7501	0.7708	0.7835	0.7496	0.805	0.7461	0.8878	0.7823	0.7992	0.8241
0.84307	0.0469067	0.804565	0.0604145		28	0.8246	0.8269	0.8803	0.8247	0.8396	0.8786	0.7766	0.803	0.7683	0.8271	0.8125	0.7994	0.8456	0.8297	0.8505	0.8861	0.9445	0.9481	0.8521	0.8432		28	0.8976	0.8145	0.8301	0.802	0.9231	0.7242	0.9193	0.7774	0.8175	0.7351	0.7493	0.7715	0.7518	0.7508	0.8207	0.7369	0.8708	0.7707	0.8051	0.8229
0.842375	0.0456133	0.804805	0.0556458		29	0.8384	0.8072	0.8739	0.8506	0.8128	0.9396	0.777	0.8275	0.7736	0.8344	0.8002	0.7937	0.8659	0.8221	0.858	0.8546	0.9013	0.9352	0.841	0.8405		29	0.8861	0.8144	0.8305	0.806	0.8926	0.7226	0.92	0.786	0.8185	0.7376	0.7537	0.7893	0.7599	0.7548	0.8265	0.7452	0.8756	0.7626	0.7916	0.8226
0.830815	0.0498845	0.79424	0.0543254		30	0.8219	0.7914	0.8973	0.8354	0.8102	0.9362	0.7566	0.8001	0.7645	0.8051	0.7979	0.8015	0.8316	0.8159	0.8378	0.8316	0.8856	0.944	0.8192	0.8325		30	0.911	0.8028	0.8085	0.7855	0.8482	0.7278	0.9168	0.7823	0.7932	0.7292	0.7401	0.7793	0.7686	0.7481	0.8036	0.7311	0.8573	0.7618	0.7821	0.8075
0.82847	0.0448138	0.7951	0.0532597		31	0.8286	0.8083	0.8761	0.8389	0.8273	0.8942	0.7456	0.7819	0.7594	0.7942	0.7918	0.8017	0.8367	0.8213	0.8569	0.8343	0.8981	0.9185	0.8346	0.821		31	0.8877	0.8163	0.8287	0.7779	0.8505	0.723	0.935	0.7662	0.8017	0.7338	0.742	0.7738	0.76	0.7477	0.8021	0.7511	0.8369	0.7762	0.7877	0.8037
0.81794	0.0459968	0.788535	0.0453921		32	0.8206	0.8124	0.8633	0.8362	0.8208	0.8739	0.7351	0.7679	0.734	0.7834	0.7891	0.7714	0.837	0.8007	0.8404	0.8375	0.8931	0.9002	0.8161	0.8257		32	0.85	0.7906	0.8175	0.7742	0.8369	0.7275	0.9071	0.78	0.8041	0.733	0.7325	0.7779	0.7647	0.7486	0.8172	0.7414	0.8147	0.756	0.7842	0.8126
0.81503	0.0484369	0.784585	0.0402109		33	0.8084	0.8033	0.8679	0.8188	0.8061	0.8566	0.7429	0.7778	0.7245	0.7853	0.7707	0.7679	0.8277	0.8137	0.826	0.842	0.9125	0.9115	0.8249	0.8121		33	0.8019	0.7984	0.8178	0.7825	0.8246	0.7283	0.8954	0.7838	0.802	0.7379	0.7449	0.7645	0.7633	0.7429	0.8185	0.7341	0.804	0.7526	0.7953	0.799
0.81543	0.0566934	0.781005	0.0403257		34	0.8195	0.8054	0.8736	0.816	0.8024	0.859	0.7278	0.7586	0.7227	0.7774	0.763	0.7778	0.8375	0.8038	0.8195	0.8378	0.9254	0.9463	0.8151	0.82		34	0.8141	0.8068	0.8215	0.78	0.8026	0.7134	0.8898	0.7746	0.7899	0.7286	0.736	0.767	0.7603	0.7406	0.8082	0.747	0.7927	0.753	0.7885	0.8055
0.815945	0.0508893	0.78634	0.0423898		35	0.819	0.7928	0.8798	0.8275	0.8239	0.8545	0.7211	0.7754	0.7263	0.7909	0.7734	0.7701	0.8164	0.8108	0.8296	0.8206	0.9222	0.9036	0.8356	0.8254		35	0.849	0.8207	0.8222	0.778	0.7948	0.7135	0.8881	0.7809	0.8089	0.73	0.7413	0.77	0.7735	0.7554	0.816	0.7372	0.8054	0.7566	0.7828	0.8025
0.813185	0.0500167	0.778865	0.039702		36	0.8094	0.8001	0.8731	0.8245	0.8019	0.88	0.723	0.7648	0.7398	0.7766	0.7635	0.7719	0.8392	0.806	0.8171	0.815	0.903	0.9059	0.8254	0.8235		36	0.8243	0.8078	0.8205	0.7638	0.7915	0.7074	0.8797	0.7765	0.7883	0.7308	0.7437	0.7666	0.7629	0.7505	0.8037	0.7321	0.7997	0.7442	0.7875	0.7958
0.813425	0.0528037	0.78254	0.0386309		37	0.8138	0.7984	0.8835	0.8204	0.8067	0.8852	0.7195	0.7651	0.7318	0.7813	0.7562	0.7743	0.8285	0.8119	0.8346	0.8053	0.9236	0.8906	0.8145	0.8233		37	0.8279	0.7866	0.8142	0.7961	0.7761	0.7196	0.8797	0.7808	0.8074	0.731	0.7296	0.769	0.7632	0.7488	0.8176	0.7482	0.7924	0.7599	0.7927	0.81
0.811705	0.0534802	0.77797	0.0384933		38	0.8066	0.8029	0.8708	0.8175	0.8158	0.8351	0.7231	0.7564	0.729	0.7763	0.7742	0.7735	0.8341	0.8093	0.8191	0.8083	0.918	0.939	0.8025	0.8226		38	0.8341	0.7983	0.8161	0.7675	0.7835	0.7192	0.8767	0.7693	0.8039	0.7299	0.7447	0.7652	0.7499	0.7442	0.809	0.7323	0.7756	0.7641	0.7812	0.7947
0.813125	0.0542394	0.77904	0.0353162		39	0.8143	0.7925	0.8684	0.8231	0.8137	0.8491	0.7177	0.7666	0.729	0.7734	0.7691	0.7629	0.8354	0.7979	0.8277	0.8376	0.9193	0.9303	0.8119	0.8226		39	0.8178	0.7856	0.8251	0.7771	0.775	0.7239	0.8623	0.7846	0.7932	0.7412	0.7456	0.7527	0.7589	0.7399	0.8215	0.7407	0.7843	0.7569	0.788	0.8065
0.80647	0.0462792	0.7741	0.0339562		40	0.8124	0.7974	0.867	0.8138	0.8089	0.8165	0.7149	0.7683	0.7209	0.779	0.7618	0.776	0.8313	0.7936	0.8321	0.8139	0.8831	0.8937	0.8078	0.837		40	0.798	0.7931	0.8155	0.771	0.7552	0.7156	0.8587	0.7773	0.7931	0.7346	0.7366	0.7649	0.7567	0.7438	0.808	0.7314	0.781	0.7655	0.7892	0.7928
0.8054	0.050063	0.770745	0.0322509		41	0.8138	0.7885	0.8631	0.8171	0.8089	0.8129	0.7225	0.7533	0.7189	0.7593	0.7667	0.7713	0.8307	0.8011	0.8152	0.8148	0.8976	0.9158	0.8207	0.8158		41	0.7553	0.7794	0.8169	0.765	0.7449	0.7132	0.8466	0.7805	0.7898	0.7377	0.7412	0.7711	0.7577	0.7417	0.8126	0.7408	0.7819	0.7535	0.7857	0.7994
0.804905	0.0531708	0.772175	0.0345885		42	0.8045	0.8015	0.8662	0.8215	0.8082	0.8187	0.7156	0.7582	0.717	0.7604	0.7497	0.7646	0.8353	0.783	0.82	0.8118	0.9136	0.9095	0.8131	0.8257		42	0.7919	0.7868	0.8085	0.7838	0.7331	0.7185	0.8605	0.7793	0.7908	0.7302	0.7312	0.7598	0.7508	0.7455	0.8017	0.7383	0.7804	0.7613	0.7973	0.7938
0.80166	0.0537444	0.76824	0.0356584		43	0.8009	0.7933	0.8641	0.8163	0.8003	0.8121	0.7088	0.7469	0.7132	0.7567	0.7547	0.7634	0.8167	0.7902	0.8146	0.8124	0.8965	0.9178	0.8045	0.8498		43	0.7867	0.7756	0.817	0.7688	0.7378	0.707	0.8522	0.7737	0.7915	0.7269	0.7295	0.7521	0.7582	0.7393	0.8013	0.7213	0.7866	0.7604	0.7829	0.796
0.807375	0.0610477	0.77092	0.0351976		44	0.8141	0.7871	0.8716	0.8157	0.8029	0.8253	0.7146	0.7607	0.7235	0.7599	0.7622	0.7653	0.8202	0.7935	0.814	0.807	0.8931	0.9908	0.7976	0.8284		44	0.8077	0.7801	0.815	0.7741	0.7306	0.7103	0.8458	0.7841	0.7973	0.7281	0.7415	0.7549	0.7488	0.7385	0.81	0.7345	0.7747	0.7594	0.7878	0.7952
0.804245	0.052404	0.76619	0.0330738		45	0.7985	0.7902	0.8622	0.809	0.8057	0.834	0.7216	0.767	0.7075	0.7531	0.7516	0.767	0.8263	0.7794	0.8304	0.8208	0.8797	0.9228	0.8171	0.841		45	0.7868	0.7738	0.8144	0.7696	0.7298	0.7076	0.8312	0.7629	0.7958	0.7251	0.7359	0.7485	0.7607	0.7346	0.8025	0.7273	0.7649	0.7689	0.7911	0.7924
0.80538	0.0536813	0.766935	0.0334625		46	0.799	0.7953	0.8645	0.8091	0.7906	0.8337	0.7095	0.7703	0.7201	0.7661	0.7517	0.7659	0.8237	0.8002	0.8201	0.8401	0.8914	0.9361	0.8166	0.8036		46	0.7725	0.7793	0.8275	0.7738	0.7216	0.7103	0.8307	0.7731	0.7889	0.7295	0.7333	0.7584	0.7498	0.7478	0.814	0.738	0.7568	0.7559	0.7847	0.7928
0.80611	0.0499663	0.767425	0.0335108		47	0.8021	0.7896	0.8608	0.8239	0.8051	0.8554	0.7204	0.759	0.7127	0.7601	0.7685	0.7705	0.831	0.8008	0.8197	0.8051	0.8985	0.8982	0.8259	0.8149		47	0.7751	0.7622	0.8268	0.7683	0.7219	0.7134	0.8361	0.7799	0.7946	0.7317	0.7389	0.7489	0.7528	0.7516	0.8046	0.7355	0.7658	0.7516	0.7868	0.802
0.80595	0.0561988	0.766055	0.0331518		48	0.8015	0.7946	0.8675	0.8312	0.8065	0.8399	0.7122	0.758	0.7116	0.7514	0.7561	0.7745	0.8234	0.7914	0.8223	0.826	0.8971	0.9411	0.8	0.8127		48	0.7879	0.7761	0.8138	0.759	0.7298	0.7045	0.8357	0.7773	0.7924	0.7206	0.7361	0.7578	0.7635	0.7393	0.8002	0.7346	0.7649	0.7523	0.7785	0.7968
0.809965	0.0591143	0.765655	0.0318067		49	0.807	0.7853	0.8659	0.8159	0.8131	0.8478	0.7143	0.7611	0.7151	0.7722	0.7655	0.7694	0.8555	0.7844	0.8237	0.8119	0.9373	0.9381	0.8044	0.8114		49	0.7568	0.7646	0.8147	0.7752	0.7327	0.7133	0.834	0.7787	0.7974	0.7258	0.7273	0.7653	0.7597	0.7315	0.7926	0.7439	0.7564	0.7598	0.7877	0.7957
0.801865	0.0537199	0.76058	0.0316803		50	0.803	0.7909	0.8551	0.8056	0.8074	0.8371	0.7153	0.7623	0.7015	0.7639	0.7441	0.7583	0.8218	0.7911	0.816	0.8162	0.8935	0.9248	0.8113	0.8181		50	0.7703	0.7605	0.8198	0.7629	0.7251	0.7144	0.8265	0.7651	0.7921	0.7185	0.735	0.757	0.7424	0.7401	0.7933	0.7193	0.7636	0.7497	0.7753	0.7807
0.80216	0.0567986	0.76156	0.0307168		51	0.8011	0.7857	0.8649	0.8175	0.8026	0.8304	0.7171	0.7551	0.7037	0.7618	0.7562	0.7597	0.816	0.7823	0.8083	0.8218	0.8889	0.9524	0.8181	0.7996		51	0.7544	0.763	0.8168	0.7583	0.7199	0.7124	0.8167	0.7652	0.7838	0.7201	0.7452	0.7482	0.7625	0.7353	0.813	0.7353	0.7659	0.7556	0.7698	0.7898
0.804375	0.0545944	0.76205	0.03004		52	0.7926	0.798	0.8654	0.8027	0.7934	0.8403	0.6978	0.7499	0.7328	0.749	0.758	0.7713	0.8312	0.801	0.8175	0.8332	0.8968	0.9271	0.8151	0.8144		52	0.7826	0.7629	0.803	0.7549	0.726	0.7143	0.8124	0.7701	0.7924	0.7243	0.7304	0.7548	0.7512	0.7363	0.8081	0.732	0.76	0.749	0.7821	0.7942
0.80786	0.0629034	0.763905	0.0324009		53	0.7942	0.7954	0.8646	0.805	0.7939	0.8635	0.7165	0.7533	0.7127	0.7534	0.7464	0.7642	0.8239	0.7875	0.82	0.826	0.9108	0.9715	0.824	0.8304		53	0.7803	0.7774	0.8087	0.7557	0.7193	0.7166	0.8287	0.7687	0.7987	0.7236	0.7327	0.7455	0.7538	0.7382	0.8084	0.734	0.7679	0.7533	0.7709	0.7957
0.805	0.0607699	0.758995	0.0296906		54	0.7962	0.7789	0.8653	0.8132	0.8063	0.8439	0.7089	0.7537	0.7157	0.7512	0.7533	0.7653	0.8269	0.7835	0.8201	0.831	0.9081	0.9613	0.8203	0.7969		54	0.7525	0.765	0.8038	0.7737	0.7077	0.7085	0.8044	0.7723	0.7853	0.7306	0.7378	0.7501	0.7529	0.733	0.8056	0.7313	0.7552	0.7455	0.7768	0.7879
0.80417	0.0562265	0.76172	0.0323949		55	0.7924	0.7829	0.848	0.8095	0.8069	0.8502	0.7181	0.7661	0.7078	0.7474	0.7476	0.7664	0.8313	0.7833	0.7997	0.8469	0.8877	0.9396	0.834	0.8176		55	0.7782	0.7698	0.8148	0.768	0.7085	0.7014	0.8198	0.7788	0.7807	0.7177	0.7408	0.7619	0.7655	0.7375	0.7958	0.7319	0.7583	0.7479	0.7635	0.7936
0.80447	0.0537508	0.763575	0.0316673		56	0.7977	0.7899	0.854	0.8149	0.8019	0.8426	0.7067	0.7551	0.7066	0.7648	0.7549	0.7788	0.8352	0.7785	0.8144	0.8294	0.8931	0.9177	0.8399	0.8133		56	0.769	0.7634	0.8226	0.7551	0.7174	0.7131	0.81	0.7717	0.7911	0.7327	0.7315	0.7595	0.7509	0.7467	0.813	0.7287	0.753	0.7604	0.7839	0.7978
0.804605	0.0552879	0.76204	0.0322718		57	0.7942	0.7936	0.8573	0.808	0.7945	0.8458	0.7134	0.7569	0.7111	0.7553	0.7668	0.7633	0.8236	0.7979	0.8096	0.8238	0.9007	0.9376	0.8294	0.8093		57	0.7429	0.774	0.8143	0.7751	0.7178	0.7031	0.8255	0.7597	0.7814	0.719	0.7439	0.7504	0.7593	0.7471	0.8028	0.7394	0.7512	0.753	0.7917	0.7892
0.79889	0.0508545	0.758025	0.0324138		58	0.8076	0.7806	0.8638	0.8078	0.7986	0.8323	0.7201	0.7614	0.7043	0.7597	0.7492	0.7528	0.8216	0.7929	0.8114	0.8057	0.8993	0.8958	0.8184	0.7945		58	0.7611	0.7539	0.8162	0.7619	0.7113	0.6955	0.8098	0.7672	0.7726	0.7355	0.7245	0.7582	0.7481	0.7338	0.8013	0.7264	0.7576	0.7481	0.7767	0.8008
0.80589	0.0546997	0.762285	0.0300031		59	0.8006	0.7832	0.8583	0.8006	0.8024	0.8581	0.7163	0.7641	0.7259	0.7478	0.7596	0.765	0.825	0.7926	0.8278	0.832	0.9106	0.9269	0.8168	0.8042		59	0.7509	0.7627	0.8131	0.7605	0.717	0.7126	0.8203	0.7763	0.7894	0.7239	0.7444	0.7497	0.7563	0.7462	0.8065	0.7367	0.7628	0.7566	0.7743	0.7855
0.797065	0.0490127	0.75946	0.0313944		60	0.7929	0.7852	0.8464	0.8084	0.7945	0.8294	0.7106	0.7588	0.713	0.7525	0.7556	0.7608	0.8173	0.779	0.8045	0.8145	0.912	0.8731	0.8144	0.8184		60	0.7566	0.7561	0.8137	0.7616	0.7102	0.7103	0.8088	0.7731	0.7879	0.7263	0.7353	0.7539	0.748	0.7403	0.8067	0.7241	0.7551	0.7511	0.771	0.7991
0.802155	0.0542964	0.764995	0.0319434		61	0.8079	0.8005	0.8585	0.8037	0.8088	0.824	0.7095	0.7542	0.713	0.7557	0.7575	0.7619	0.8127	0.7998	0.8127	0.8205	0.863	0.9543	0.8173	0.8076		61	0.7661	0.766	0.8239	0.7699	0.7158	0.7169	0.8199	0.7791	0.7864	0.7266	0.7493	0.7503	0.7557	0.737	0.7989	0.7236	0.7634	0.7634	0.7853	0.8024
0.8023	0.0535262	0.76225	0.0322025		62	0.8074	0.7812	0.8599	0.8116	0.7994	0.8184	0.7182	0.7564	0.709	0.7452	0.7489	0.7615	0.8223	0.7956	0.8147	0.8367	0.885	0.9161	0.8576	0.8009		62	0.7619	0.7691	0.8157	0.7628	0.7122	0.708	0.8269	0.7735	0.7956	0.7209	0.7383	0.7602	0.7543	0.7409	0.7968	0.7374	0.7563	0.7482	0.7725	0.7935
0.806195	0.054415	0.760275	0.0355322		63	0.8057	0.7879	0.8444	0.8066	0.7986	0.8441	0.7201	0.7572	0.7139	0.7554	0.76	0.7686	0.8136	0.7982	0.8135	0.8401	0.8883	0.9429	0.8463	0.8185		63	0.7387	0.7601	0.8158	0.7759	0.7051	0.7025	0.8285	0.7733	0.7951	0.7285	0.7275	0.7682	0.755	0.7279	0.8064	0.7284	0.749	0.7507	0.7811	0.7878
0.805755	0.0597586	0.767815	0.0330528		64	0.7965	0.797	0.8573	0.8118	0.7894	0.8579	0.7311	0.7572	0.709	0.7502	0.7501	0.7706	0.8062	0.7792	0.8167	0.8273	0.9045	0.9653	0.834	0.8038		64	0.7708	0.7701	0.8235	0.7764	0.7145	0.7122	0.826	0.779	0.8057	0.7251	0.7369	0.7574	0.7532	0.7429	0.8112	0.7481	0.7677	0.7633	0.7857	0.7866
0.81606	0.0558629	0.76223	0.0348491		65	0.8062	0.8054	0.8634	0.8136	0.8088	0.888	0.7678	0.7632	0.7174	0.7679	0.759	0.7911	0.8063	0.7737	0.8052	0.8376	0.9239	0.9266	0.8811	0.815		65	0.7675	0.7723	0.8223	0.7651	0.717	0.7063	0.836	0.7712	0.7828	0.7172	0.7331	0.7531	0.7556	0.7329	0.8014	0.7251	0.7566	0.7585	0.7726	0.798
0.83648	0.056983	0.766215	0.0342734		66	0.8014	0.7958	0.8629	0.8194	0.8333	0.9107	0.8112	0.7959	0.7345	0.797	0.7883	0.8133	0.816	0.7914	0.819	0.89	0.9332	0.9629	0.8991	0.8543		66	0.7795	0.7776	0.8139	0.773	0.7186	0.7169	0.8562	0.7646	0.7854	0.7293	0.7399	0.7443	0.7539	0.7425	0.7994	0.7371	0.7664	0.7503	0.7792	0.7963
0.850225	0.0485794	0.7694	0.0314449		67	0.8059	0.8133	0.8519	0.8187	0.8626	0.9363	0.8475	0.8114	0.7789	0.845	0.8351	0.8151	0.8284	0.7915	0.8275	0.9187	0.8924	0.9589	0.8867	0.8787		67	0.8093	0.7662	0.805	0.7639	0.7269	0.7224	0.841	0.7781	0.7786	0.7285	0.7401	0.7592	0.7594	0.746	0.7993	0.7438	0.7743	0.7537	0.7911	0.8012
0.86886	0.0447837	0.769995	0.0353666		68	0.8073	0.8426	0.8734	0.8311	0.8965	0.9277	0.888	0.8711	0.8231	0.8862	0.8698	0.8545	0.8338	0.7965	0.827	0.9215	0.894	0.9841	0.8716	0.8774		68	0.815	0.7703	0.8168	0.7783	0.7349	0.7154	0.8493	0.7789	0.7988	0.7197	0.7371	0.7588	0.7597	0.7467	0.8044	0.7302	0.7731	0.7491	0.7718	0.7916
0.88206	0.046523	0.773945	0.0425997		69	0.8397	0.865	0.9009	0.8495	0.9091	0.9311	0.8666	0.8838	0.8269	0.9175	0.9173	0.911	0.8329	0.784	0.8129	0.9127	0.8978	0.9769	0.9006	0.905		69	0.8734	0.7744	0.8181	0.7676	0.734	0.7261	0.8589	0.7752	0.7896	0.7217	0.7397	0.757	0.7491	0.7408	0.8085	0.7281	0.7794	0.7489	0.7773	0.8111
0.889515	0.0495704	0.77067	0.0347706		70	0.8542	0.8712	0.9229	0.893	0.9439	0.9546	0.8755	0.8854	0.8391	0.9696	0.9118	0.898	0.8309	0.7948	0.8071	0.9132	0.9424	0.9466	0.8805	0.8556		70	0.8013	0.7693	0.8122	0.7636	0.7264	0.7132	0.838	0.7658	0.7902	0.7247	0.7357	0.753	0.7481	0.7507	0.8204	0.7499	0.7896	0.7604	0.7871	0.8138
0.90439	0.0553918	0.774585	0.0402787		71	0.8557	0.8787	0.9394	0.8961	0.9176	0.9476	0.931	0.8735	0.8656	1.0398	0.9445	0.9008	0.845	0.8164	0.8156	0.9381	0.9235	0.99	0.8881	0.8808		71	0.7933	0.7769	0.8133	0.7671	0.7259	0.7101	0.8411	0.772	0.798	0.7251	0.7303	0.7467	0.7488	0.7379	0.8088	0.851	0.79	0.7509	0.7814	0.8231
0.916275	0.0496677	0.790705	0.0778892		72	0.8619	0.8578	0.9319	0.9372	0.9513	0.9951	0.926	0.926	0.8727	0.961	0.9293	0.9458	0.8472	0.84	0.8464	0.937	0.9595	1.0072	0.9101	0.8821		72	0.793	0.788	0.8131	0.7659	0.738	0.7078	0.8964	0.7838	0.7967	0.7253	0.7414	0.7589	0.7565	0.7396	0.8164	1.0707	0.7699	0.7512	0.7853	0.8162
0.93142	0.0477067	0.798335	0.0988385		73	0.876	0.8862	0.9548	0.9725	0.9522	0.9977	0.9357	0.9815	0.8776	1.0078	0.936	0.9303	0.8424	0.9	0.8561	0.9583	0.9385	0.9916	0.9302	0.903		73	0.8054	0.7979	0.8225	0.7787	0.7436	0.6991	0.8519	0.7863	0.7907	0.7289	0.7413	0.7636	0.7542	0.7433	0.8173	1.1842	0.7718	0.7557	0.7829	0.8474
0.93208	0.045568	0.79883	0.090521		74	0.8997	0.9291	0.9558	0.9491	0.9495	0.9957	0.9289	0.9692	0.8745	1.0078	0.9542	0.9247	0.8457	0.884	0.9003	0.9619	0.9173	1.0125	0.9059	0.8758		74	0.8186	0.7905	0.8247	0.776	0.7555	0.7018	0.8641	0.7723	0.8097	0.7264	0.7356	0.7566	0.751	0.7485	0.82	1.1392	0.787	0.7505	0.7948	0.8538
0.9374	0.0386396	0.798045	0.0787801		75	0.9062	0.9168	0.9237	0.9169	0.9683	1.0205	0.9651	0.8694	0.8948	0.9493	0.9123	0.9634	0.8747	0.9393	0.9593	0.9623	0.9323	1.0063	0.9313	0.9358		75	0.8322	0.7957	0.8231	0.7893	0.746	0.7171	0.8995	0.778	0.8018	0.7345	0.7318	0.7562	0.7496	0.7496	0.811	1.0745	0.7872	0.7486	0.7923	0.8429
0.95125	0.0473563	0.79348	0.0700983		76	0.8841	0.9139	0.9498	0.9484	0.9748	1.0713	0.9637	0.9305	0.9395	0.9961	0.9607	0.9556	0.8608	0.9254	0.9741	0.9825	0.9303	1.027	0.9278	0.9087		76	0.8015	0.8066	0.8196	0.7822	0.7639	0.7247	0.8763	0.7753	0.7994	0.7177	0.7339	0.7533	0.7474	0.7359	0.8298	1.0367	0.7873	0.7596	0.7871	0.8314
0.95611	0.0489674	0.794955	0.0679068		77	0.8897	0.9662	0.9761	0.9893	1.0065	1.0116	0.9589	0.9153	0.9014	1.0204	0.9816	0.9497	0.8665	0.948	1.0153	0.9703	0.9361	1.0129	0.9445	0.8619		77	0.8042	0.8002	0.8382	0.7906	0.7651	0.7126	0.864	0.7736	0.8096	0.7225	0.7453	0.7462	0.761	0.7524	0.8052	1.0269	0.7853	0.7577	0.7813	0.8572
0.953825	0.0450215	0.804235	0.0753295		78	0.8912	0.9458	0.9635	0.9867	0.9949	1.0011	0.9142	0.9183	0.9025	1.0515	0.9521	0.9399	0.9059	0.9174	0.9961	0.9714	0.9542	1.0249	0.9497	0.8952		78	0.83	0.8283	0.8781	0.7811	0.7688	0.7247	0.863	0.7754	0.8092	0.7385	0.762	0.7572	0.756	0.746	0.82	1.0625	0.7847	0.7482	0.785	0.866
0.95593	0.0418245	0.810585	0.0842313		79	0.9233	0.952	0.9372	0.9501	0.972	1.0264	0.9791	0.9301	0.9076	1.0004	0.9773	0.9631	0.89	0.8993	0.9852	0.9597	0.9775	1.0492	0.9315	0.9076		79	0.7987	0.8556	0.8966	0.7905	0.7672	0.72	0.8651	0.7847	0.8242	0.7364	0.7466	0.7659	0.7536	0.7536	0.8244	1.1012	0.8079	0.7573	0.7837	0.8785
0.969685	0.0400127	0.819285	0.105899		80	0.9429	0.9589	0.959	1.0075	1.0165	1.0586	0.982	0.9837	0.9431	0.9905	0.9576	0.9867	0.8892	0.9058	0.9561	0.9933	0.9727	1.017	0.9473	0.9253		80	0.8186	0.8607	0.8772	0.7941	0.7824	0.716	0.8473	0.7847	0.8146	0.756	0.7431	0.7661	0.7563	0.7619	0.8138	1.2191	0.8331	0.7478	0.7882	0.9047
0.96201	0.0489526	0.81861	0.0883493		81	0.8878	0.9923	0.9573	0.9904	1.0216	1.0575	1.0031	0.9835	0.8934	1.0385	0.9482	0.9625	0.9251	0.8849	0.929	0.9933	0.9505	0.975	0.9255	0.9208		81	0.8169	0.839	0.8922	0.8332	0.796	0.7212	0.8543	0.7831	0.8271	0.7683	0.7545	0.7689	0.7586	0.7572	0.8145	1.1359	0.8056	0.757	0.7844	0.9043
0.953765	0.0461278	0.823505	0.061549		82	0.8665	0.9685	0.9586	0.9582	0.9939	1.0387	1.0221	0.9924	0.8686	0.9884	0.9461	0.926	0.9237	0.8826	0.9565	0.993	0.9429	0.955	0.9302	0.9634		82	0.8306	0.8474	0.8934	0.8229	0.8396	0.7433	0.8442	0.7963	0.8446	0.7585	0.7618	0.7904	0.7892	0.824	0.8221	1.0206	0.8181	0.7549	0.7891	0.8791
0.96518	0.0459691	0.8265	0.064879		83	0.8912	0.9757	0.978	1.0123	0.9686	1.0547	0.9793	0.9956	0.9359	1.0244	0.95	0.9501	0.9113	0.861	0.9857	1.0135	0.9416	0.984	0.9455	0.9452		83	0.7943	0.8143	0.8863	0.8412	0.8125	0.7183	0.8625	0.7911	0.866	0.7537	0.768	0.787	0.7913	0.903	0.8418	0.9881	0.8409	0.7569	0.7915	0.9213
0.968985	0.0442554	0.829155	0.0673236		84	0.8895	0.9915	0.9916	1.0455	1.0055	1.0343	0.9565	0.9831	0.9179	1.036	1.0187	0.9594	0.9099	0.9282	0.9633	0.9738	0.9466	0.9553	0.9224	0.9507		84	0.87	0.834	0.8575	0.8213	0.7963	0.7213	0.8791	0.8149	0.8715	0.7545	0.744	0.8408	0.7595	1.0105	0.8343	0.9232	0.835	0.7683	0.7849	0.8622
0.971995	0.0434429	0.83197	0.0500861		85	0.894	0.975	1.0132	0.994	1.0032	1.0661	0.9984	0.9452	0.9245	1.0339	1.0048	0.9676	0.9211	0.9305	1.0122	0.9745	0.9624	0.9382	0.9427	0.9384		85	0.8781	0.8332	0.8265	0.8231	0.8229	0.7168	0.8714	0.8155	0.8327	0.7544	0.7652	0.8867	0.8322	0.9113	0.8489	0.9088	0.8467	0.7799	0.8186	0.8665
0.9737	0.0422718	0.84516	0.0729013		86	0.9064	0.975	1.0413	1.0152	1.0088	1.0255	0.9883	0.9182	0.9345	1.0591	0.9787	0.9696	0.9196	0.9591	0.9769	0.9276	0.9934	0.9544	0.9425	0.9799		86	0.842	0.8884	0.8483	0.8053	0.865	0.7302	0.8658	0.7932	0.8431	0.7461	0.7714	1.0718	0.8315	0.9212	0.8238	0.8811	0.8666	0.7817	0.8381	0.8886
0.9702	0.0449032	0.84492	0.0519528		87	0.9569	1.0036	1.0146	1.0197	0.9969	0.9694	0.9952	0.9706	0.912	1.0759	1.0086	0.964	0.9347	0.8945	0.966	0.9136	0.9716	0.9909	0.9195	0.9258		87	0.87	0.8558	0.8554	0.8279	0.8881	0.7328	0.8688	0.8072	0.8533	0.7621	0.7957	0.9279	0.8552	0.9042	0.8293	0.9191	0.8712	0.7628	0.8411	0.8705
0.98091	0.0423745	0.845855	0.0476884		88	0.9483	1.0187	1.0014	1.0336	0.9516	1.0095	0.9453	0.976	0.9176	1.0944	1.0109	0.9794	0.9499	0.9383	0.9584	0.9794	0.9901	1.0219	0.9348	0.9587		88	0.8248	0.8573	0.876	0.8615	0.8373	0.7395	0.8503	0.7955	0.8662	0.7737	0.8086	0.9086	0.8868	0.8818	0.9042	0.8937	0.8433	0.7651	0.8784	0.8645
0.98034	0.0414499	0.85604	0.0624669		89	0.9389	1.0045	0.9948	1.0064	1.0126	0.9983	1.0133	0.9543	0.891	1.0909	0.9988	0.9761	0.9437	0.9897	0.967	0.9668	0.9731	0.9852	0.918	0.9834		89	0.822	0.8799	0.87	0.8248	0.8355	0.7216	0.8942	0.8643	0.844	0.7753	0.7891	0.9304	0.9153	0.8459	0.9207	0.9841	0.8396	0.773	0.8899	0.9012
0.98574	0.0322073	0.86773	0.0695881		90	0.9587	1.0333	1.0013	1.0139	1.0102	0.9991	1.0369	0.9928	0.9204	1.0202	1.0266	0.98	0.9579	0.9596	1.0011	0.9547	0.9663	0.9646	0.9664	0.9508		90	0.8575	0.876	0.899	0.8517	0.8504	0.7455	0.8877	0.865	0.8554	0.7722	0.8357	0.9091	0.8875	0.8357	1.0318	1.0224	0.8722	0.7681	0.8468	0.8849
0.9831	0.0387857	0.863785	0.0639359		91	0.9246	1.0158	1.0321	1.0376	0.9954	0.9873	1.0244	0.9918	0.916	1.0225	1.0191	0.9774	0.951	0.9186	0.9967	0.9784	0.9866	1.004	0.9362	0.9465		91	0.854	0.9047	0.8882	0.8236	0.8468	0.7261	0.901	0.835	0.8368	0.7753	0.8666	0.9038	0.8946	0.8826	0.9565	1.0118	0.8623	0.7758	0.8297	0.9005
0.99357	0.0438049	0.86681	0.0638157		92	0.946	1.0557	1.0213	1.0377	0.9786	0.9963	0.9404	0.9652	0.986	1.0411	1.0819	0.9948	0.9426	0.929	1.0292	0.9569	0.9795	1.0413	0.9515	0.9964		92	0.8328	0.8658	0.898	0.859	0.851	0.735	0.949	0.8357	0.8677	0.7816	0.8243	0.9514	0.93	0.8232	0.9391	0.9682	0.9002	0.7859	0.8215	0.9168
0.98954	0.0424947	0.870915	0.0662892		93	0.9583	1.0325	1.0136	1.058	0.9758	0.9471	0.9931	0.9384	0.9491	0.9768	1.0664	0.9728	0.9974	0.9615	1.0578	1.0202	1.0047	1.0034	0.9243	0.9396		93	0.8473	0.8675	0.907	0.8228	0.8888	0.7392	0.955	0.8436	0.8666	0.7948	0.8476	0.9388	1.0141	0.7958	0.9211	0.9244	0.8867	0.7852	0.8455	0.9265
0.982625	0.0394558	0.8774	0.0765973		94	0.9519	1.011	1.0401	1.0839	0.9912	0.973	0.9641	0.9596	0.9372	0.9777	0.9939	0.9866	0.9607	0.9812	1.0491	0.9462	0.9876	0.9839	0.9203	0.9533		94	0.8751	0.8873	0.8943	0.8203	0.884	0.7453	0.9399	0.8567	0.87	0.8019	0.8116	0.9348	1.0993	0.8292	0.9235	0.9384	0.9008	0.7841	0.8212	0.9303
0.98931	0.0410737	0.88161	0.0693037		95	0.9499	1.0176	1.0573	1.0665	1.0262	0.9703	0.9814	0.9298	0.9201	1.0385	0.9992	0.9759	0.9704	0.9449	1.0239	0.9741	0.988	1.0206	0.9506	0.981		95	0.8755	0.8646	0.92	0.8266	0.9263	0.7406	0.9338	0.8495	0.9128	0.8072	0.832	0.9239	1.0563	0.8412	0.9124	0.9418	0.8752	0.8091	0.8292	0.9542
0.98815	0.0423096	0.8785	0.0657692		96	0.9755	0.9833	1.0409	1.0485	1.0189	1.0177	0.9712	0.9214	0.9636	1.0655	1.0139	0.9705	0.9669	0.9462	1.0319	0.9946	0.9899	0.9992	0.9128	0.9306		96	0.8821	0.8734	0.9217	0.8471	0.8965	0.7364	0.9033	0.8487	0.8972	0.8013	0.8685	0.8504	1.0488	0.8268	0.9508	0.9347	0.9112	0.812	0.832	0.9271
0.984735	0.0416479	0.877615	0.059901		97	0.9767	0.9798	1.0012	1.0373	0.9678	1.038	0.9615	0.956	0.9346	1.0733	1.0085	0.9363	0.9667	0.9642	1.0543	0.9746	1.0156	0.9791	0.9209	0.9483		97	0.8869	0.8819	0.9101	0.8425	0.8938	0.7458	0.8979	0.8585	0.8765	0.8138	0.8473	0.8661	1.0143	0.8379	0.9755	0.9159	0.9062	0.8033	0.8425	0.9356
0.99608	0.0393868	0.89291	0.068462		98	0.9832	1.0377	1.0264	1.0575	0.9854	1.06	0.9706	0.9818	0.9926	1.0734	1.0037	0.9754	0.9561	1.0111	1.0222	0.9629	0.9462	0.9845	0.9455	0.9454		98	0.918	0.9047	0.9218	0.8713	0.9199	0.7405	0.8892	0.872	0.8987	0.8363	0.8498	0.889	1.0784	0.89	0.9662	0.9189	0.9129	0.7962	0.832	0.9524
0.99131	0.044897	0.89084	0.0630641		99	0.9709	0.9963	1.0261	1.0574	0.997	1.0512	0.9698	0.9703	0.9003	1.1052	0.9894	1.0051	0.9687	0.9586	0.9974	0.9608	0.9691	1.0191	0.964	0.9495		99	0.9214	0.909	0.9304	0.8595	0.9101	0.7455	0.9166	0.8772	0.9108	0.819	0.873	0.9039	1.0387	0.8551	0.9544	0.9161	0.9121	0.7954	0.83	0.9386
0.994285	0.0473767	0.890225	0.0565643		100	0.9807	1.0265	1.0159	1.1178	0.9912	0.9879	0.958	0.9403	0.9398	1.0966	0.9997	0.9898	0.9803	0.9853	0.9995	0.9795	0.9835	1.0327	0.9411	0.9396		100	0.9285	0.8944	0.9271	0.9182	0.886	0.7469	0.9069	0.8726	0.9037	0.8301	0.8526	0.8563	1	0.8743	0.9435	0.9545	0.9137	0.8317	0.8258	0.9377
0.998135	0.0571757	0.896165	0.0653216		101	0.9677	1.0291	1.0712	1.1486	0.9549	1.0206	0.9544	0.9259	0.9313	1.0692	1.0305	0.9648	0.9648	1.0186	1.0265	0.991	0.9675	1.0389	0.9518	0.9354		101	0.8995	0.8948	0.9482	0.8987	0.9034	0.7475	0.8942	0.8798	0.916	0.8256	0.8343	0.8377	1.0384	0.8953	0.9703	0.9833	0.9223	0.8322	0.8501	0.9517
0.999975	0.0485545	0.899075	0.0605033		102	0.9578	0.9859	1.1005	1.0935	1.0232	1.0515	0.959	0.9459	0.9545	1.0807	1.0062	0.9877	0.9675	0.9694	1.0182	0.9972	1.0001	1.0011	0.9535	0.9461		102	0.8886	0.9172	0.9316	0.8669	0.921	0.7541	0.9371	0.9187	0.9297	0.8148	0.8419	0.8774	0.9781	0.8651	0.9603	0.9811	0.9553	0.8364	0.8443	0.9619
0.99187	0.0500106	0.891985	0.0540222		103	0.9356	1.0224	1.0811	1.0383	1.0006	1.0921	0.9637	0.9446	0.9091	1.0311	1.0387	0.9909	0.9834	0.9324	1.0103	0.9807	1.0004	0.9935	0.9653	0.9232		103	0.8791	0.8974	0.9249	0.8912	0.921	0.7514	0.9409	0.8948	0.912	0.8275	0.8443	0.909	0.9373	0.8378	0.9654	0.9511	0.9344	0.8219	0.8582	0.9401
0.990815	0.0522515	0.89974	0.0521117		104	0.954	0.9824	1.0316	1.0201	0.957	1.078	0.9609	0.9521	0.9353	1.0884	1.0697	1.0107	0.991	0.9639	1.0424	0.9176	0.9866	1.0174	0.9419	0.9153		104	0.8994	0.9018	0.9056	0.8784	0.9416	0.7599	0.961	0.8783	0.9411	0.8385	0.8884	0.8999	0.9515	0.8673	0.9878	0.9429	0.9232	0.8428	0.8556	0.9298
0.98693	0.0425271	0.897245	0.0597314		105	1.0028	0.9972	1.0108	1.0271	0.9366	1.0208	0.9791	0.9618	0.9205	1.1108	0.9922	0.9764	0.9787	1.0176	1.0176	0.9468	0.9648	0.9867	0.9477	0.9426		105	0.873	0.9219	0.9106	0.8783	0.9475	0.7581	0.9461	0.8587	0.9447	0.8203	0.8637	0.9657	0.9029	0.8737	1.0082	0.9089	0.9221	0.8016	0.8839	0.955
0.988165	0.0413822	0.903	0.0583875		106	0.9931	0.9768	1.0095	1.0483	0.9421	1.0392	0.9473	0.9651	0.9415	1.0874	1.0203	0.9914	0.9825	0.9897	1.0297	0.9308	0.9782	0.9926	0.9545	0.9433		106	0.8897	0.9463	0.9038	0.8824	0.9438	0.7635	0.9612	0.8816	0.9643	0.8373	0.8883	0.9344	0.9142	0.8706	1.0113	0.9378	0.9186	0.8012	0.8641	0.9456
0.998285	0.0438258	0.92039	0.0536607		107	1.0095	0.985	1.0371	1.052	0.9797	1.0678	0.9237	0.949	0.967	1.0809	1.0058	1.0244	0.991	1.0058	1.0489	0.9699	0.974	1.0067	0.9445	0.943		107	0.9551	0.9585	0.9439	0.9322	0.9366	0.7661	0.9582	0.9064	0.9537	0.8641	0.9215	0.9537	0.9039	0.9125	0.9949	0.9561	0.9542	0.8185	0.8831	0.9346
0.9929	0.0414505	0.91245	0.0485136		108	0.997	0.9852	1.0526	1.0428	1.0387	1.0581	0.9411	1.0029	0.9445	1.0711	0.986	0.9863	0.9822	0.9799	1.0074	0.9642	0.9604	0.982	0.9262	0.9494		108	0.9331	0.9489	0.923	0.9228	0.9308	0.7812	0.9428	0.9181	0.9404	0.8404	0.9042	0.9323	0.8923	0.9077	0.9812	0.9298	0.9262	0.8192	0.904	0.9706
0.99894	0.0335606	0.92289	0.0513999		109	0.9584	1.0059	1.0127	1.0544	0.9818	1.0341	0.9563	1.0227	0.9725	1.0517	1.0252	0.9748	1.0127	0.9883	1.0326	0.9811	0.9835	1.0301	0.9467	0.9533		109	0.9345	0.9619	0.9522	0.8983	0.9106	0.8084	0.9761	0.9118	0.9373	0.8442	0.9263	0.9092	0.9149	0.948	1.0016	0.9382	0.9661	0.8178	0.9132	0.9872
1.00206	0.0313158	0.91838	0.0434158		110	0.9756	1.0271	1.0299	1.0336	0.9618	1.0341	0.9947	0.9752	0.9782	1.075	1.0372	0.9995	1.0057	0.9988	1.0001	1.002	1.0016	1.0017	0.9393	0.9702		110	0.9781	0.9434	0.9417	0.9045	0.9293	0.8231	0.9553	0.9134	0.9391	0.8731	0.9095	0.9187	0.9028	0.908	0.9765	0.9041	0.9585	0.8187	0.9056	0.9642
1.006	0.0293586	0.91772	0.0427469		111	0.9733	1.0424	1.0322	1.0328	0.9585	1.0431	0.9942	1.0035	0.9888	1.0683	1.0214	0.9979	0.9991	0.98	1.022	1.0205	1.0119	0.982	0.9586	0.9895		111	0.9084	0.9382	0.9621	0.8919	0.9413	0.8639	0.9609	0.9479	0.9898	0.8634	0.9366	0.9017	0.8806	0.913	0.9554	0.8627	0.9336	0.8307	0.9027	0.9696
0.994555	0.0368071	0.920075	0.0394703		112	0.9547	1.006	1.0696	1.0557	0.9661	1.0142	0.9644	0.9887	0.9622	1.0374	0.9831	1.0156	1.0142	0.9355	1.0313	0.9707	1.0191	0.9594	0.958	0.9852		112	0.927	0.9316	0.9547	0.9149	0.9376	0.8748	0.9536	0.9409	0.9624	0.8541	0.9547	0.9448	0.8825	0.8683	0.9548	0.8737	0.9546	0.8467	0.9044	0.9654
0.991385	0.0308305	0.925855	0.0443913		113	0.9773	1.0234	1.0188	1.034	0.9748	1.042	0.9489	0.966	0.9714	1.0271	1.0133	1.0123	1.0118	0.9652	1.0121	0.9387	0.9753	0.9881	0.952	0.9752		113	0.9042	0.9623	0.9494	0.9119	0.9332	0.8671	0.9727	0.9504	0.9919	0.8665	0.9151	0.956	0.8823	0.8984	0.9977	0.8869	0.9556	0.8364	0.9162	0.9629
0.99732	0.0282721	0.933865	0.049522		114	0.9836	1.0565	1.0334	1.0128	0.9899	1.0519	0.9611	0.9641	0.9685	0.9996	0.9989	0.9925	0.9966	0.9802	1.0294	0.9725	1.0209	0.9821	0.9774	0.9745		114	0.9292	0.9525	0.9732	0.9483	0.9551	0.9069	0.9687	0.9651	1.0484	0.8741	0.9146	0.9077	0.897	0.9153	0.999	0.85	0.9363	0.8428	0.9169	0.9762
0.998875	0.0282788	0.93129	0.0492268		115	0.999	1.0197	1.0253	1.0114	0.9672	1.0531	0.972	0.9823	0.9646	0.9833	1.016	1.0067	0.9632	1.0221	1.0376	0.9512	1.0209	1.0203	0.9785	0.9831		115	0.894	0.9234	0.9748	0.9839	0.9606	0.8387	0.9761	0.9476	1.0427	0.901	0.9286	0.9312	0.9018	0.925	0.9718	0.8508	0.9318	0.8661	0.9104	0.9655
1.00625	0.0341717	0.927665	0.0449242		116	0.9933	1.0337	1.0339	1.0278	0.9645	1.0645	0.9654	0.9525	0.9866	1.0576	1.0513	0.9976	1.0223	0.9808	1.0068	0.9764	1.0005	1.0504	0.9824	0.9768		116	0.8847	0.9398	0.9625	0.9552	0.9623	0.8445	0.9741	0.9009	1.001	0.8732	0.9263	0.9072	0.9171	0.8939	0.9744	0.8783	0.9931	0.8701	0.9335	0.9612
1.00274	0.0352257	0.933585	0.051461		117	0.9809	1.0351	1.0575	1.0305	0.9616	1.0221	0.9634	0.9826	0.9915	1.0695	1.0114	0.9798	1.027	0.9465	1.0167	0.9704	0.9993	1.0541	0.9686	0.9863		117	0.9039	0.9398	0.9874	0.925	1.0021	0.8696	0.9817	0.9065	1.0585	0.8675	0.9213	0.915	0.9364	0.8694	0.9599	0.8944	0.9613	0.8586	0.9691	0.9443
1.00204	0.032442	0.942325	0.0444895		118	1.0101	1.0223	1.0887	1.0156	0.9576	1.0378	0.9464	1.0051	0.9999	1.0424	1.0057	0.9701	0.9983	0.9753	1.029	0.9827	0.9761	0.9962	0.9885	0.993		118	0.9435	0.9594	0.9822	0.9033	0.9467	0.8691	0.9987	0.9259	1.0355	0.8964	0.9665	0.9605	0.9349	0.9319	0.9547	0.8835	0.9549	0.857	0.9508	0.9911
0.99798	0.0293814	0.93743	0.0464569		119	0.994	0.9969	1.0369	1.0156	0.9603	1.0124	0.9761	0.9729	0.9873	1.0801	1.0107	1.0017	1.0044	0.9652	1.0159	0.9952	0.9766	1.0162	0.9476	0.9936		119	0.9666	0.9244	0.9991	0.8927	0.9569	0.8568	1.002	0.9319	1.0158	0.8983	0.9434	0.9636	0.8995	0.9097	0.974	0.8809	0.9489	0.857	0.9624	0.9647
1.00392	0.0291409	0.942845	0.0386153		120	1.011	0.9618	1.0394	1.0465	0.9641	1.0506	1.0092	0.9935	0.9765	1.0571	1.0021	0.9992	1.003	0.9753	1.0293	1.0004	0.998	1.017	0.9679	0.9765		120	0.9384	0.9485	1.0073	0.9538	0.9541	0.8619	0.9997	0.9549	0.9717	0.9015	0.9224	0.906	0.9138	0.9388	0.9797	0.9198	0.9655	0.8748	0.9754	0.9689
1.00306	0.0332715	0.94817	0.0357202		121	0.9957	1.0142	1.0288	1.0628	0.9645	1.0597	0.952	0.9741	0.9645	1.0648	0.9928	0.9977	0.9926	0.9628	1.0173	0.993	0.9902	1.0314	1.0056	0.9967		121	0.9501	0.9473	0.9676	0.9645	0.9726	0.8768	0.9703	0.9349	1.0336	0.8995	0.9543	0.9157	0.9538	0.9685	0.9569	0.9198	0.9679	0.8864	0.9442	0.9787
1.00442	0.0348573	0.950975	0.042109		122	0.9794	1.0153	1.0403	1.0508	0.9637	1.0633	0.9594	0.9913	0.9854	1.0829	0.9939	0.9948	0.9946	0.9461	1.0172	1.0132	0.9741	1.0181	1.0015	1.0031		122	0.9603	0.9714	0.9791	0.9378	0.96	0.8766	0.9987	0.9234	1.0541	0.8926	0.9513	0.9296	0.9553	0.9406	0.9395	0.92	0.9683	0.8846	0.9743	1.002
1.00368	0.03074	0.9457	0.0406509		123	0.9734	0.9777	1.0477	1.0268	0.9803	1.0303	0.9694	0.9624	1.005	1.0786	0.9818	0.9843	1.0165	0.9896	0.9855	1.0277	0.9907	1.0292	0.9844	1.0324		123	0.9633	0.9294	1.0094	0.9396	0.9731	0.8665	0.9726	0.9379	1.0168	0.8933	0.968	0.9407	0.9521	0.9257	0.93	0.8881	0.9645	0.8833	0.9775	0.9822
1.0042	0.0362171	0.950315	0.039966		124	0.9924	1.01	1.0198	1.0642	0.9805	1.0907	0.9062	0.9886	1.0058	1.0272	1.003	1.0052	1.0004	1.0152	0.9934	0.9851	0.9821	1.0344	0.9847	0.9951		124	0.9307	0.945	0.9987	0.9352	0.9664	0.876	1.017	0.9494	1.0088	0.9084	0.9601	0.9488	0.9314	0.9243	0.9438	0.8838	0.9884	0.9095	0.9855	0.9951
1.00921	0.0378171	0.948595	0.0419786		125	1.0062	0.9897	1.0685	1.0107	0.9771	1.0901	0.9293	0.9788	0.9982	1.0432	0.9948	1.031	1.0524	0.968	1.0159	0.9666	1.0058	1.0085	1.0406	1.0087		125	0.9207	0.965	0.9901	0.9688	0.9745	0.8881	1.007	0.9353	1.0116	0.8849	0.9181	0.9403	0.9673	0.8977	0.9492	0.8988	0.9762	0.8966	0.9696	1.0121
0.99978	0.0441153	0.9443	0.0394148		126	1.0013	0.9928	1.0913	1.0296	0.9834	1.0751	0.9668	0.9406	0.9569	1.08	0.971	0.9782	1.0011	0.9699	0.9797	0.9437	1.0328	1.0371	0.9848	0.9795		126	0.9298	0.9682	0.9635	0.9807	0.9725	0.8927	1.0011	0.9386	1.0089	0.8699	0.94	0.9428	0.9677	0.9038	0.9482	0.8755	0.953	0.9072	0.9322	0.9897
1.00436	0.0460038	0.954985	0.0428357		127	0.9944	0.9763	1.0758	1.0894	0.9742	1.0854	0.9983	0.9904	0.9556	1.0468	0.9881	0.9793	1.0242	0.9537	0.9664	0.9527	1.002	1.0691	0.951	1.0141		127	0.9175	0.9926	0.9928	0.9748	0.9799	0.8836	1.0405	0.9554	1.0233	0.8839	0.949	0.9356	0.9546	0.9507	0.947	0.8908	0.977	0.9149	0.9532	0.9826
1.0107	0.0380422	0.961235	0.0469268		128	0.9895	0.9804	1.053	1.0559	0.972	1.0711	0.9785	0.9772	0.9573	1.0807	0.9892	1.0071	1.0269	0.9619	1.0432	0.9975	1.0151	1.0587	0.9869	1.0118		128	0.9216	0.9451	1.0191	0.9872	0.9718	0.8879	1.0595	0.9528	1.0137	0.8932	0.9453	0.9147	0.9778	1.0009	0.9754	0.8954	0.9838	0.9411	0.9271	1.0113
1.01549	0.0329744	0.95821	0.0431788		129	0.9963	0.9587	1.0388	1.0596	1.0037	1.059	0.9915	0.9625	0.9843	1.0719	1.03	1.0089	1.0236	1.0351	1.0691	0.9867	1.0224	1.0071	0.9972	1.0034		129	0.9469	0.9448	1.0127	0.9992	0.964	0.9021	1.0278	0.9447	0.9974	0.9098	0.9051	0.9535	0.9591	0.9333	0.9984	0.8857	0.9766	0.932	0.933	1.0381
1.00962	0.0348298	0.956085	0.043524		130	0.986	1.0097	1.0888	1.0464	0.9741	1.0333	0.976	0.9925	0.9808	1.0543	1.0114	1.0331	0.9887	1.0052	1.0516	0.967	0.9796	1.0509	0.9784	0.9846		130	0.9673	0.9602	0.9963	0.9703	0.9907	0.8884	1.0265	0.9486	0.9596	0.9318	0.977	0.9661	0.9081	0.9405	0.9931	0.872	1.012	0.892	0.9168	1.0044
1.00312	0.0414049	0.969555	0.0455315		131	1.0114	0.9981	1.0571	1.0389	0.956	1.0661	0.9595	0.9644	0.9489	1.087	1.0039	0.9991	0.9949	0.9827	0.9907	0.9679	0.9783	1.078	0.9787	1.0008		131	0.952	0.9838	0.9662	1.0132	1.0351	0.9154	1.0368	0.975	1.0142	0.9503	0.9943	0.9794	0.933	0.9548	0.9871	0.8756	1.0076	0.8849	0.9289	1.0035
1.00401	0.0312377	0.96807	0.0437259		132	0.9759	1.0081	1.0556	1.0121	0.986	1.0359	0.9692	0.9919	0.9791	1.0687	0.9978	1.0039	0.996	0.9788	1.0269	0.9564	0.9914	1.0632	0.9902	0.9931		132	0.9703	0.952	0.9896	1.0016	1.0191	0.9163	1.0298	0.9644	1.0455	0.9226	0.967	0.9817	0.929	0.985	0.9622	0.8742	1.0137	0.9114	0.9394	0.9866
1.01048	0.0388062	0.96758	0.042834		133	1.0187	1.06	1.0855	1.0384	0.9835	1.0613	0.9895	0.9583	0.9626	1.0053	1.0224	0.9919	1.0183	0.9905	1.0471	0.9757	1.0038	1.0661	0.9558	0.9749		133	0.9137	0.9707	1.0188	0.9825	0.9801	0.9751	1.0598	0.9557	1.0247	0.9259	0.9597	0.9241	0.9408	0.9392	1.0071	0.8851	1.0044	0.9351	0.9534	0.9957
1.00809	0.033323	0.96595	0.0468482		134	1.0125	1.0041	1.0579	1.0478	0.9804	1.0622	0.9735	0.998	0.99	1.0123	1.0348	0.9773	1.002	0.969	1.0088	0.948	1.0166	1.0744	1.0021	0.9901		134	0.9461	0.9779	1.0231	0.9997	0.9826	0.9486	1.0818	0.9755	0.9873	0.8984	0.954	0.9735	0.9255	0.9307	0.9855	0.8893	0.9971	0.9111	0.9191	1.0122
1.01224	0.0323066	0.970015	0.0437179		135	1.0225	0.9914	1.0603	1.0236	0.9894	1.0408	0.9466	1.0145	1.0352	1.0502	1.0257	1.0118	1.0065	0.9922	1.0215	0.9601	1.0178	1.07	1.0005	0.9642		135	0.9488	0.9378	1.0125	1.0318	1.0033	0.9181	1.037	0.9793	1.0325	0.9182	0.954	0.9884	0.9563	0.9458	0.9643	0.8877	0.9897	0.9428	0.9267	1.0253
1.02814	0.0425137	0.97704	0.0446507		136	1.0125	1.0175	1.0919	1.0408	1.0121	1.0879	0.9274	1.0163	1.0187	1.0839	1.0368	1.0447	1.015	1.0148	1.0515	0.9552	1.0066	1.0993	1.0154	1.0145		136	0.9557	0.933	1.0136	1.0445	1.0198	0.9563	1.029	0.9712	1.077	0.9216	0.9858	0.9879	0.9365	0.9486	0.9793	0.9047	0.988	0.9461	0.9357	1.0065
1.02262	0.0347931	0.980075	0.0499634		137	0.9956	1.0412	1.0526	1.0151	1.0086	1.0826	0.9779	1.0076	0.9961	1.0763	1.0526	1.0083	1.0206	1.0221	1.0331	0.9655	0.9903	1.0945	0.9984	1.0133		137	0.9706	0.9525	1.0677	1.0186	1.0028	0.9289	1.0676	0.9673	1.0906	0.9377	0.9815	0.9597	0.9107	0.9504	0.9836	0.9245	0.9938	0.9386	0.9516	1.0028
1.01824	0.0245829	0.986105	0.0530259		138	0.998	1.0359	1.047	1.0364	1.0193	1.0505	0.9976	1.0128	0.9896	1.0557	1.0154	1.0269	1.0322	0.9993	1.0245	0.9889	0.9986	1.0618	0.9952	0.9791		138	0.9672	0.9797	1.0504	1.0756	1.0483	0.9489	1.0383	0.9453	1.0819	0.9317	1.0245	0.9792	0.9467	0.9246	0.9901	0.9191	1.0158	0.9182	0.9399	0.9967
1.01683	0.034617	0.983955	0.0489731		139	1.0133	1.0004	1.0339	1.0698	0.973	1.0814	0.9684	1.0121	1.0149	1.0246	0.9842	1.0248	0.9945	1.0077	1.0377	0.9648	1.0156	1.0938	1.0137	1.008		139	0.985	0.9741	1.0336	1.0305	0.9889	0.9386	1.021	0.9673	1.0561	0.931	1.0212	1.0653	0.9486	0.9496	0.952	0.8875	1.0129	0.9341	0.9413	1.0405
1.00653	0.0286154	0.97527	0.0463306		140	0.9891	1.0172	1.0402	1.0266	0.978	1.0578	0.952	0.993	1.0072	1.0033	0.9832	1.008	1.0289	1.0225	0.9973	0.9637	0.9893	1.0596	0.9887	1.025		140	0.9099	0.9444	1.0337	0.982	1.0208	0.8931	1.0123	0.9715	1.0729	0.9289	0.975	0.9962	0.9568	0.9888	0.9821	0.9299	0.9899	0.9284	0.9497	1.0391
1.00563	0.0390313	0.97105	0.0490538		141	1.0201	0.9915	1.0597	1.0155	0.9866	1.0412	0.9151	0.97	1.0176	1.0142	1.0047	1.0387	1.0452	1.0089	1.01	0.9261	0.9948	1.0732	0.9902	0.9892		141	0.9232	0.9354	0.9998	1.0257	0.9981	0.9488	1.0343	0.9795	1.0965	0.9454	0.9538	0.9867	0.9507	1.008	0.9633	0.9107	0.9729	0.8809	0.9229	0.9844
