# Supplementary material for: Hypoxia controls plasma membrane targeting of polarity proteins by dynamic turnover of PI4P and PI(4,5)P2
Source: eLife. 2022 Jun 9;11:e79582. doi: 10.7554/eLife.79582 (PMC9242647; doi:10.7554/eLife.79582)
Supplement: Figure 5—source data 3. [file elife-79582-fig5-data3.xlsx]

## Sheet: Figure 5A-Lgl
Figure 5 Souce Data 3
						1	2	3	4	5	6	7	8	9	10	11	12	13	14	15	16	17	18	19	20			1	2	3	4	5	6	7	8	9	10	11	12	13	14	15	16	17	18	19	20
WT		RNAi			WT
AVG	STDEV	AVG	STDEV																								RNAi
C1_PM/Cy	C1_PM/Cy	C1_PM/Cy	C1_PM/Cy		min	C1_PM/Cy	C1_PM/Cy	C1_PM/Cy	C1_PM/Cy	C1_PM/Cy	C1_PM/Cy	C1_PM/Cy	C1_PM/Cy	C1_PM/Cy	C1_PM/Cy	C1_PM/Cy	C1_PM/Cy	C1_PM/Cy	C1_PM/Cy	C1_PM/Cy	C1_PM/Cy	C1_PM/Cy	C1_PM/Cy	C1_PM/Cy	C1_PM/Cy		min	C1_PM/Cy	C1_PM/Cy	C1_PM/Cy	C1_PM/Cy	C1_PM/Cy	C1_PM/Cy	C1_PM/Cy	C1_PM/Cy	C1_PM/Cy	C1_PM/Cy	C1_PM/Cy	C1_PM/Cy	C1_PM/Cy	C1_PM/Cy	C1_PM/Cy	C1_PM/Cy	C1_PM/Cy	C1_PM/Cy	C1_PM/Cy	C1_PM/Cy
6.5651	0.283292	6.64311	0.37479		1	6.4887	6.7343	6.4269	6.7782	6.3616	6.5766	6.5983	6.406	6.0071	6.1971	6.2126	6.9476	6.9006	6.9034	6.9281	6.6296	6.738	6.1679	6.8442	6.4553		1	6.9593	6.0349	6.5816	6.7841	5.9845	6.8345	7.3578	6.8173	6.1977	6.6277	6.973	6.6243	7.0117	6.3945	6.0502	6.6385	7.0024	6.7527	6.9045	6.3311
5.37101	0.353999	5.32657	0.487995		2	5.2385	5.2812	5.6392	5.4774	4.9352	5.5066	5.2023	4.9459	5.0845	4.9731	5.6672	5.2578	5.1268	5.8149	6.2266	5.7284	5.586	4.929	5.6773	5.1224		2	5.4204	5.1782	4.6497	5.8085	4.7463	5.6489	5.9453	5.6396	4.4439	5.0093	6.0338	5.5405	5.6266	5.6182	4.4185	5.4586	5.3975	5.6634	5.4976	4.7867
5.3263	0.343298	5.4569	0.448036		3	5.1422	4.9687	4.8825	5.746	4.8567	5.1416	5.0899	5.2965	5.4255	4.7494	5.5906	5.6046	5.757	5.4435	5.5149	5.6277	5.2757	5.1033	5.2617	6.048		3	6.1896	5.4117	5.0735	5.1677	5.0043	5.7456	6.3839	5.2741	5.0106	5.2144	5.8417	5.7957	6.0033	4.9069	5.568	5.4212	5.5815	4.7294	5.706	5.1088
5.29517	0.437077	5.42411	0.489101		4	4.9036	5.2663	5.5514	4.79	4.7857	5.9193	5.8701	5.2693	5.3083	5.0115	4.9353	5.2142	4.9287	5.457	6.2595	5.6359	5.866	4.8667	5.2598	4.8048		4	5.4315	5.2978	4.4578	5.8748	5.0542	5.4174	5.6966	5.5151	4.6923	6.3424	5.789	5.772	5.9809	5.8111	4.5087	5.6083	5.5545	5.214	5.0406	5.4232
5.31443	0.34456	5.344	0.479258		5	5.1046	4.9312	5.5018	5.2657	5.3213	5.8642	5.0417	5.1994	5.2914	4.889	5.6357	5.4494	5.0252	5.3514	6.2061	4.9234	5.4708	4.8692	5.5922	5.3548		5	5.0335	4.8583	5.0214	5.7447	4.8695	6.0211	5.3563	5.4753	4.997	5.0217	6.0331	5.7671	5.7004	5.9056	4.2304	5.6021	5.6893	5.5382	5.1738	4.8411
5.439	0.400573	5.26473	0.357578		6	5.1196	4.9248	5.7051	5.5347	5.105	6.2547	5.4103	5.481	5.1402	4.7618	4.9454	5.8788	5.3053	5.6169	5.8028	5.9402	5.786	4.9744	5.6972	5.3957		6	5.6072	5.2577	4.8041	5.5321	4.7497	5.3292	5.2986	5.804	5.0695	4.9549	5.4194	5.4864	5.6183	5.7003	4.4031	5.3183	5.3013	5.4637	5.3084	4.8685
5.25433	0.34291	5.20423	0.441022		7	5.3539	4.8494	5.5596	5.3693	4.8336	5.9103	5.1585	5.1239	5.1759	4.4497	4.9707	5.421	5.6773	5.3143	5.4141	4.9701	5.2864	5.1177	5.7335	5.3973		7	5.3042	5.023	4.4708	5.7303	5.06	5.127	5.4319	5.3745	5.2377	5.085	5.5712	5.589	5.5985	5.2005	3.8658	5.2054	5.6569	5.4641	5.3289	4.7598
5.275	0.345897	5.18748	0.343777		8	5.516	5.0959	5.643	5.2939	5.139	5.6989	5.547	4.6351	5.1659	4.5888	4.7068	5.6055	5.1621	5.4172	5.6167	5.5346	5.3087	5.0235	5.6631	5.1383		8	5.1181	5.1911	5.1341	5.4162	4.5602	5.3226	5.2926	5.4842	5.5906	5.0005	5.4026	5.3995	5.6353	5.1044	4.2564	4.9695	5.4759	5.3095	5.2925	4.7938
5.23942	0.310156	5.07095	0.282138		9	5.2922	4.8074	5.2634	5.6334	5.1356	5.5832	5.7345	4.9853	5.4237	4.6806	4.6553	5.2411	5.1576	5.3512	5.5425	5.2629	5.3658	4.8521	5.5114	5.3092		9	5.2416	5.1432	4.6409	5.3259	4.8297	5.1221	5.0617	5.0884	5.0829	5.3861	5.3195	5.2555	5.3644	5.3228	4.2282	5.1377	4.9604	4.9574	5.1542	4.7964
5.26035	0.297784	5.12609	0.369593		10	5.4367	4.9112	5.3369	5.2177	4.7491	6.0435	5.345	5.0568	5.4624	4.79	5.1005	5.2222	5.1173	5.3989	5.6725	5.058	5.1872	5.2505	5.3984	5.4522		10	5.139	4.7672	4.5925	4.882	5.0966	5.4121	5.2155	5.3814	5.1693	5.4575	5.3603	5.7363	5.2067	5.1538	4.166	5.5135	5.0957	5.1551	5.4106	4.6108
5.22265	0.270304	5.01674	0.313824		11	5.3033	4.9502	5.5057	5.5346	4.9369	5.6389	5.4027	5.0048	5.2509	4.4784	5.11	5.1621	5.446	5.1551	5.4082	5.3448	5.495	5.0484	5.1093	5.1677		11	5.2397	5.0941	4.3594	5.0295	4.4697	5.0472	5.0223	5.3555	5.0573	5.0656	5.1543	5.45	4.969	5.1452	4.481	5.2912	5.4782	5.0092	5.0038	4.6126
5.22096	0.390036	4.93132	0.214121		12	5.3188	4.7418	5.8499	5.3062	4.7848	5.7018	5.3246	4.7719	5.1252	4.5749	5.1435	5.1143	5.0918	5.0918	5.8031	5.0972	5.3513	5.1493	6.0673	5.0096		12	5.0457	4.9561	4.7182	5.0502	4.7584	5.0028	4.8429	5.2999	4.8394	5.1664	5.0352	4.7619	5.1697	5.0436	4.4559	5.2183	4.9995	4.9158	4.6811	4.6655
5.13848	0.265188	4.9442	0.281781		13	5.5079	4.9279	5.6599	5.329	4.8793	5.1725	5.2961	5.0943	4.9838	4.6791	4.8966	4.8815	5.3389	5.5354	5.2453	5.1429	5.2604	4.7323	5.08	5.1265		13	5.2637	4.8617	4.559	5.0497	4.9981	4.9666	4.8074	4.9309	4.9453	5.2492	5.0843	4.8472	5.2439	5.1688	4.1446	5.2163	5.0673	4.8314	5.1289	4.5197
5.04976	0.276721	4.94829	0.195623		14	5.0928	4.7677	5.2309	5.1015	4.966	5.3604	5.2978	4.5173	4.8895	4.4055	5.0288	5.1911	5.2978	5.2831	5.4152	5.3193	4.946	4.7426	5.0633	5.0785		14	5.058	4.9007	4.5862	5.1656	4.9217	5.0312	4.9421	4.9674	5.0556	4.9666	4.9574	5.264	5.3156	4.9594	4.6193	5.0349	5.0168	4.8526	4.6998	4.6508
5.1025	0.304843	4.96595	0.165174		15	4.9746	5.0295	5.4937	5.2409	4.758	5.3658	4.9944	4.691	5.2047	4.5425	5.1056	5.221	5.1191	5.5902	5.3688	5.0719	5.0489	4.5871	5.6298	5.0124		15	5.1399	5.0214	4.77	5.2933	4.8571	4.9187	5.056	5.0844	5.1	4.769	4.7838	4.9537	5.1015	5.1502	4.8252	5.0639	5.0857	4.6843	4.8538	4.8072
5.03777	0.280588	4.97023	0.206896		16	5.1633	4.402	5.4275	4.8214	5.102	4.959	5.2221	4.876	4.8962	4.4878	4.7147	4.927	5.1738	5.2825	5.2839	5.2297	5.145	5.0017	5.2207	5.4192		16	5.0027	4.9948	4.9616	5.1377	4.9942	5.1087	4.96	5.1769	4.9733	5.1417	4.7676	5.0118	4.9792	5.3267	4.3503	4.797	4.9973	4.9352	5.1104	4.6775
4.98555	0.29923	4.9748	0.200123		17	4.9652	4.6542	5.3828	5.0258	4.5581	5.4952	5.1791	4.7128	5.1183	4.6086	4.4376	5.2582	5.1521	5.0407	5.0547	5.2136	5.042	4.8629	5.3188	4.6304		17	5.1456	4.8496	4.815	4.9282	5.1568	5.0574	5.0824	5.1768	4.9944	4.7128	4.9559	4.8754	5.5132	5.2104	4.9637	4.8587	4.939	4.7368	4.8298	4.694
4.922	0.213664	4.97103	0.193336		18	4.9655	4.367	5.221	4.8476	4.9797	4.8778	4.8128	4.7432	4.7653	4.5413	4.8251	4.9609	5.1178	5.136	5.0865	4.938	5.0817	4.9344	5.0241	5.2143		18	4.9623	4.718	4.7643	5.0747	4.9658	4.7023	4.9956	5.0798	5.2263	5.1064	4.8434	5.1624	5.2347	4.9471	4.6854	5.0371	5.2756	4.8084	5.1277	4.7032
4.91846	0.223387	4.97037	0.161372		19	4.8242	4.4754	5.1409	4.6909	4.8115	5.1689	5.1351	4.6764	4.6594	4.5515	4.8955	5.2177	4.9335	5.2406	5.0177	5.0189	4.8624	4.9866	5.1119	4.9502		19	5.3289	4.7787	4.8388	5.0928	4.9667	5.0676	4.777	5.124	5.0204	4.9593	4.7815	4.9981	5.2156	4.9749	4.8512	4.9199	5.1792	4.7698	4.9562	4.8069
4.94971	0.22317	4.94238	0.163612		20	4.9015	4.4809	5.2859	4.9379	4.8769	4.6484	5.1402	4.9069	4.8433	4.6353	4.715	5.1858	4.952	5.3546	4.9565	5.0808	5.1095	4.8922	5.1626	4.928		20	5.0877	4.9061	4.9169	4.9867	5.1162	4.9289	4.8332	5.2491	4.9418	5.0944	4.6963	4.8048	5.3105	4.9586	4.7185	4.8082	4.9897	4.7979	4.8717	4.8303
4.97887	0.239127	5.00498	0.1952		21	4.9523	4.52	5.1337	4.8702	4.8273	4.7567	4.8865	4.7927	4.8768	4.5676	4.9586	5.1018	5.2761	5.2832	5.0868	5.2667	5.3501	4.8883	5.2937	4.8883		21	5.0875	4.9139	4.9969	5.1792	4.7118	4.8029	5.3427	5.1748	5.3696	4.89	4.7861	5.2265	5.1258	5.0284	4.8899	4.6612	4.9915	4.9697	5.0647	4.8865
4.9794	0.271473	5.05232	0.149506		22	4.7758	4.3587	5.2254	5.1487	5.1512	4.8282	4.9293	4.9927	4.888	4.4531	4.7058	5.2751	4.9426	5.0919	5.1298	5.4783	5.1777	4.8414	5.0265	5.1679		22	5.0025	4.8141	4.9893	4.9192	5.0772	5.0794	5.2484	5.2588	5.133	5.2095	5.2325	4.8396	5.0807	5.2973	4.9432	4.8414	5.0054	5.1511	5.0204	4.9033
4.95019	0.26542	5.00276	0.148042		23	4.9489	4.1933	5.0206	4.9261	4.7348	5.0512	4.8623	4.9141	4.7987	4.6327	4.6333	5.2531	5.0277	4.9135	5.1352	5.3558	5.1302	5.1303	5.2419	5.1002		23	5.1086	5.079	5.0605	4.8019	4.9247	5.1086	5.0177	5.0575	5.0573	4.9242	4.7032	5.0471	5.1516	5.1267	5.0058	5.0737	5.2806	4.871	4.962	4.6936
4.98578	0.241156	5.00965	0.157686		24	5.1217	4.3767	5.343	4.7232	4.9016	5.0644	4.9726	4.8647	4.9397	4.5238	5.0674	5.1105	4.8973	5.1336	4.8731	4.9892	5.1926	5.0951	5.227	5.2985		24	4.9756	4.9598	5.077	5.1806	4.9478	5.1206	5.0213	5.0339	4.9462	5.0121	4.7533	5.3097	4.9153	5.0305	4.8141	5.0864	5.3108	4.786	5.1269	4.785
5.00451	0.267623	4.99629	0.131018		25	4.883	4.3768	5.1387	4.7568	5.0628	5.3672	4.9199	4.8396	5.1389	4.665	4.7061	5.151	4.7187	5.0872	5.0548	5.3603	5.1719	5.0308	5.3098	5.3509		25	5.1367	5.0134	5.0868	5.0441	4.9901	4.8801	5.0445	5.0577	5.134	4.8466	5.1544	4.9085	5.0996	5.0866	4.9678	4.9832	5.0266	4.5865	4.9977	4.881
5.03071	0.243795	4.98823	0.201518		26	5.0662	4.3008	5.2116	4.8781	4.979	5.2294	5.0818	4.8719	5.0724	4.571	4.9889	5.1305	5.1187	5.3095	5.2295	4.9741	5.1016	4.9736	5.25	5.2755		26	4.9	4.7631	5.1301	5.1629	5.1933	4.9923	4.9985	5.1014	5.0641	4.4688	5.0228	5.1298	4.9151	4.9734	5.0407	4.7759	5.4613	4.8524	4.8733	4.9454
4.96682	0.25397	4.98021	0.187855		27	4.9025	4.3069	5.0879	4.8488	4.9927	5.0847	4.7368	4.8842	4.6413	4.7227	4.7169	5.0314	5.0333	5.2394	5.1709	5.3985	5.1523	5.0239	5.0941	5.2672		27	5.186	4.8598	5.0242	5.0384	4.8228	4.8511	5.1916	5.0321	4.8017	5.243	4.6388	4.9013	5.1617	4.9712	4.7267	5.2604	5.0793	4.7545	5.1946	4.865
4.97285	0.217628	5.00228	0.135341		28	4.85	4.5094	5.1459	4.8996	5.0079	5.1281	4.8331	4.8594	4.6805	4.5623	4.8325	5.0359	5.0575	5.139	5.0209	5.3169	5.0843	5.0489	5.1994	5.2454		28	4.967	4.9393	4.9631	4.9014	4.9885	5.0875	5.3536	5.0041	4.9674	4.7936	4.7375	5.1097	5.0374	4.8636	4.9653	5.063	5.1608	4.9844	5.1534	5.005
4.94745	0.270683	5.03396	0.22715		29	4.972	4.4349	4.9201	4.7442	4.7785	5.108	4.752	4.8225	4.896	4.5072	4.5779	4.9348	5.2061	5.2784	5.3968	5.2833	5.0278	5.1372	4.8937	5.2775		29	5.0811	4.8766	5.2842	5.0042	4.907	4.9212	5.2975	5.0248	5.4401	4.7922	4.6184	4.9657	5.173	5.0437	5.264	5.4223	5.0553	4.7858	5.0124	4.7098
4.9511	0.217947	4.9676	0.203463		30	4.9175	4.2595	5.2853	5.0803	4.9252	4.9296	4.9707	4.9529	4.9166	4.688	4.6812	5.1039	4.8621	5.1467	5.1146	4.9879	5.0375	5.0796	5.1189	4.9641		30	5.1747	4.996	5.0012	4.7285	4.9392	5.3065	5.267	4.8393	4.9066	4.7971	4.4797	5.0838	5.2942	4.8479	4.8598	5.009	5.1045	4.8258	4.9919	4.8992
4.99082	0.254282	5.0336	0.202412		31	5.0229	4.3268	5.0226	4.9715	4.8995	5.0148	4.9226	4.7071	4.6675	4.7133	4.9083	5.1672	5.2371	5.3611	5.3823	5.0764	4.9657	5.3046	5.0515	5.0935		31	5.1544	5.076	4.991	4.7178	4.9663	5.0999	5.1895	4.6595	4.9099	5.0737	4.7753	5.2495	5.5369	4.8912	5.0933	4.965	5.0612	4.9615	5.2952	5.0048
4.95285	0.257819	4.9571	0.168571		32	5.0033	4.2682	5.2648	5.0952	4.983	5.1093	4.6984	4.6106	4.8293	4.6779	4.7509	4.878	5.3268	5.1284	4.9288	5.1959	5.0532	5.0071	5.0064	5.2416		32	4.9741	4.9766	4.813	5.0901	4.8741	5.0773	4.9013	4.9611	4.8791	4.6626	4.6577	4.9661	5.1552	5.0549	4.7778	4.8727	5.171	4.9878	5.3552	4.9343
4.97847	0.302723	4.96557	0.207381		33	4.8957	4.0725	4.9136	4.911	5.0881	5.294	4.7775	4.7275	4.7152	4.7841	4.784	5.1475	4.8715	5.3687	5.1443	5.2888	5.1279	5.0906	5.3461	5.2209		33	5.0613	4.8882	4.8093	4.823	4.8977	4.9312	4.8172	4.9888	5.0948	4.7315	4.4061	5.2454	5.2567	4.9435	4.8661	5.0893	5.2941	5.1676	5.0475	4.9521
5.05428	0.214464	5.01024	0.218592		34	5.0601	4.3988	5.4588	5.058	4.977	5.0155	5.2296	4.8419	4.9041	4.8598	4.9586	5.1123	5.1121	5.0473	5.162	5.0385	5.189	5.2789	5.2288	5.1545		34	5.0475	4.8514	4.9001	5.0377	4.9116	5.1826	5.2116	4.8016	5.0034	4.802	4.611	5.053	5.2706	5.0974	4.6647	5.0472	5.5556	5.0065	5.2131	4.9362
4.99763	0.248699	4.97474	0.235414		35	5.1312	4.2968	5.2046	4.8462	5.0713	5.0734	4.7427	4.9976	4.7484	4.6962	5.0033	5.4042	5.0673	5.0219	5.3843	4.9515	5.0589	4.9779	5.1904	5.0845		35	5.0678	4.924	4.9148	5.0752	4.8614	5.1031	4.9961	5.082	4.4977	4.9592	4.4854	5.2275	5.4596	4.9484	4.7111	4.9288	5.1384	4.932	5.3062	4.876
4.97284	0.218684	4.96153	0.152967		36	5.0902	4.3242	5.1102	5.1356	5.1731	5.0537	4.7254	4.9368	4.8041	4.7446	4.9209	5.0263	4.8498	5.2365	5.1194	4.8359	5.241	4.9858	5.1638	4.9795		36	5.0182	4.8415	4.8276	4.936	5.0657	5.0292	5.0292	4.9785	4.9787	4.8848	4.5453	4.9584	5.0421	4.785	4.8839	5.185	5.2635	5.0274	4.8776	5.0731
4.97753	0.272179	5.01124	0.134914		37	5.0325	4.2052	5.1178	4.7094	4.9764	5.0504	4.7727	4.6932	4.8825	4.7126	4.8506	5.1397	5.2225	5.2536	4.9392	5.3022	5.1587	5.3482	4.9746	5.2086		37	5.1884	4.907	4.9715	5.0069	4.9773	5.1061	5.1571	5.1232	4.9515	4.7916	4.6829	4.8716	5.061	5.2073	4.917	5.0185	4.9921	5.0737	5.1613	5.0589
5.0281	0.278675	4.98143	0.249399		38	4.9612	4.1826	5.0152	5.1772	5.0183	4.949	4.545	4.844	4.8808	4.924	5.2029	5.293	5.2247	5.07	5.1431	5.3958	5.3503	5.1797	5.1118	5.0934		38	4.9719	4.7975	4.8927	4.8307	4.9235	5.0221	5.1548	4.9212	5.1017	4.9507	4.1096	5.1051	5.2877	4.8918	5.2511	5.144	4.9364	5.1597	5.2111	4.9653
5.03869	0.266613	5.01752	0.151362		39	5.1654	4.4096	5.1815	5.0033	4.926	5.0655	4.9983	5.0297	5.1058	4.3684	4.7745	5.3316	5.3615	4.9925	5.0852	5.2425	5.1686	5.166	5.0286	5.3694		39	5.0499	4.7719	5.0465	5.2532	4.9828	4.9771	5.0297	4.9576	4.9714	4.7627	4.7633	5.1579	5.1231	5.0196	4.925	5.0548	5.2911	5.1141	5.211	4.8877
5.02327	0.235411	4.99141	0.166637		40	5.1026	4.3285	5.079	4.9695	4.9978	5.1833	4.8311	5.0536	4.8582	4.5862	4.9065	5.2487	5.1308	5.1565	5.149	5.103	5.2354	5.2828	5.0222	5.2407		40	4.9955	4.9528	5.0527	4.8655	5.0765	5.114	5.2148	5.0418	5.0589	4.8166	4.5145	5.0199	5.1768	5.1371	4.8595	5.0635	5.0714	5.0115	5.071	4.7138
5.0946	0.238441	4.99485	0.263643		41	5.1067	4.2309	5.0176	5.085	4.822	5.3629	5.0816	5.0824	5.1726	4.9595	5.226	5.0831	5.1617	5.309	5.2764	5.1779	5.1671	5.174	5.2884	5.1072		41	5.2035	4.8537	4.8967	4.8815	5.0817	5.0458	4.8318	5.2452	4.9268	4.717	4.4072	5.3256	5.6302	4.9074	4.772	5.135	5.0909	5.0723	5.1555	4.7172
4.99996	0.284651	4.99645	0.155396		42	4.8582	4.2532	5.1671	5.3698	4.8429	4.9735	4.7213	4.7914	5.0607	4.7559	4.9822	5.1947	5.0316	5.048	5.3975	5.5387	4.9761	4.7691	5.0711	5.1962		42	5.1212	4.9422	5.2158	4.9086	4.9353	5.2728	5.0393	5.0402	4.7818	4.926	4.8513	4.8229	5.3721	4.8975	4.9754	4.8905	5.0947	5.0047	5.0018	4.835
5.03738	0.261123	4.99522	0.185502		43	4.9464	4.2421	5.3825	5.0512	5	5.1017	4.8454	4.9734	4.9506	4.7937	4.7575	5.1477	5.1742	5.2181	5.5061	5.1934	5.1721	5.1437	5.029	5.1188		43	5.0134	4.8524	4.9635	4.8697	5.0128	4.7094	5.0385	5.0032	4.8607	5.0077	4.6098	5.2481	5.2191	4.8763	4.8615	5.237	5.226	5.0872	5.2985	4.9096
5.06505	0.193558	5.03443	0.149441		44	5.0318	4.6577	4.9888	5.1183	5.0417	5.0625	4.8041	5.0158	4.7625	4.8117	5.2751	5.108	5.266	5.1078	5.3347	5.3078	5.0395	5.0365	5.2028	5.3279		44	5.022	4.9391	5.1369	5.1043	5.2021	5.1545	5.1315	5.0148	4.8717	5.0165	4.6237	5.1128	5.2126	5.0286	4.9005	5.0785	4.9527	5.2586	5.0799	4.8472
5.09379	0.173636	5.01782	0.176805		45	4.9278	4.5092	5.1027	5.0417	5.1951	5.017	5.2143	4.9108	5.1047	5.1415	5.1926	5.1484	5.2984	5.2195	5.0456	5.2307	5.0052	5.1471	5.166	5.2575		45	5.01	4.7684	5.1102	4.96	5.0492	4.9776	5.02	5.1917	4.8514	5.1159	4.584	4.9161	4.945	5.2293	4.9837	5.1737	5.0224	5.1653	5.3896	4.8929
5.06495	0.214275	5.00232	0.174413		46	4.9684	4.5747	5.2862	4.9891	5.071	5.1331	5.0846	4.871	4.8987	4.655	5.2001	5.1769	5.2095	5.0687	5.2615	5.3533	4.9023	4.9785	5.3521	5.2643		46	4.8918	4.9438	4.7767	5.4275	4.9325	5.0697	5.2499	5.0031	5.1106	4.9947	4.6702	4.8161	4.9783	5.159	4.8147	5.0184	4.9974	4.9746	5.2066	5.0107
5.05528	0.262769	4.99141	0.225423		47	4.9321	4.4283	5.4632	4.8655	5.1133	5.0253	5.0718	4.6899	4.9739	4.762	4.9428	5.1904	5.2789	5.3985	4.9434	5.3737	5.1773	5.1236	5.4096	4.9421		47	5.1673	4.8212	4.9193	4.9749	5.1298	4.7544	4.8377	5.1854	4.839	5.115	4.261	5.2957	5.0196	5.142	5.0379	5.1032	4.931	5.205	5.0988	4.9901
5.06676	0.221698	5.09297	0.204695		48	5.0545	4.4971	5.2669	4.716	5.1367	5.2111	5.0447	4.8561	4.9606	4.9536	4.9149	5.3624	5.128	5.1398	5.2751	5.0182	5.1107	5.2187	5.0066	5.4636		48	5.1024	5.395	5.1323	5.0468	5.1158	5.3204	5.4984	4.8933	4.9047	4.9145	4.6079	5.0293	5.2631	5.1228	4.9049	4.9623	5.1712	5.089	5.3145	5.0709
5.04798	0.207059	4.98977	0.19471		49	4.8354	4.5105	5.1959	4.8109	4.909	5.0449	5.0611	4.7762	5.0115	4.9316	5.2005	5.256	5.3093	5.1652	5.1085	5.3359	5.1205	5.144	4.9836	5.2491		49	4.8981	4.8121	5.0495	5.0397	4.9716	5.1704	5.1547	5.1372	4.7687	5.0233	4.3071	5.0622	5.1593	4.9672	5.1237	5.0409	5.009	4.9333	5.076	5.0914
5.06747	0.233841	5.0078	0.287546		50	5.0918	4.3076	5.1047	5.0038	5.1004	5.1782	5.1149	4.8809	4.7489	4.959	5.1627	5.4703	5.2197	5.114	5.3257	5.0459	5.1368	5.0617	5.1083	5.2142		50	5.0699	4.8132	5.1094	5.3948	5.2914	5.2536	5.1797	4.9595	4.9264	4.5961	4.1429	4.7843	5.3728	5.1112	4.975	4.9754	5.2213	5.1263	4.9675	4.8853
5.08384	0.24139	5.04801	0.128184		51	4.9099	4.4201	5.4588	5.154	5.2443	5.3356	5.2578	5.0898	4.711	4.8575	5.1974	4.913	4.9504	5.1455	5.2376	5.3221	5.266	5.0284	5.0699	5.1077		51	5.0472	4.967	4.9679	5.302	5.0669	4.9886	4.9733	4.7456	5.0823	5.0419	4.8612	5.0389	5.2245	5.107	5.1528	5.0123	5.1909	5.0042	4.9826	5.2032
5.01569	0.198448	4.95976	0.24024		52	5.0511	4.4218	5.051	4.8305	5.0573	4.9863	4.9249	4.8006	4.7697	5.0646	5.2014	5.0327	5.1376	5.3366	5.0846	5.0358	5.1577	5.2075	5.169	4.9931		52	5.0362	4.8819	5.0351	4.8685	5.0151	5.2164	4.9664	5.0487	4.519	4.9237	4.2712	5.0146	4.9652	5.1825	4.9418	4.9271	4.8676	5.3751	5.2498	4.8894
5.0489	0.233559	4.96791	0.214943		53	4.9315	4.416	5.194	4.8044	4.8087	5.1913	5.1829	4.7516	5.1991	4.7797	5.1091	5.2097	5.1113	5.391	5.0439	5.2837	5.1607	5.1923	5.1985	5.0187		53	4.9668	4.7675	4.8492	4.7661	4.969	4.9281	5.1171	5.1876	4.9728	4.953	4.2102	5.1153	5.147	5.0237	5.0522	4.9918	5.1317	5.0172	5.1657	5.0261
5.03271	0.200157	5.02059	0.152543		54	4.8563	4.6	5.2641	4.7521	4.9603	5.3456	4.8754	4.9453	4.8205	4.9998	5.1559	4.9884	5.3905	5.1574	5.0761	5.2288	5.0027	4.9731	5.1763	5.0856		54	5.2126	4.8777	4.9418	5.1346	5.0796	4.9223	4.8301	4.9337	4.9095	4.9749	4.6898	5.2316	5.3179	5.0053	5.0818	5.1453	5.0594	4.9704	5.1628	4.9306
5.05937	0.197835	5.00278	0.201201		55	5.088	4.421	5.111	4.9116	5.3039	5.1573	4.8851	4.8356	5.0511	5.0262	4.9276	5.0996	5.2666	5.1202	5.1903	5.138	5.2064	5.0597	5.1137	5.2745		55	4.9795	4.8091	4.8097	5.0704	5.1041	5.1397	5.2265	4.9569	4.8672	4.9175	4.4435	5.0207	5.152	5.193	5.0742	5.2844	5.0149	4.9268	5.2764	4.7891
5.01044	0.22433	5.05334	0.151132		56	5.0031	4.4398	5.2482	4.7584	4.9265	5.3773	5.0287	4.9709	5.0137	4.7595	4.6455	5.164	5.222	5.2831	5.1159	5.0747	5.0278	5.1209	5.0031	5.0257		56	5.0192	4.7899	5.1391	5.0259	5.0235	5.0215	5.0411	5.0749	5.0081	5.1123	4.8665	4.9417	5.155	5.0002	5.2581	5.056	5.1685	5.231	5.3831	4.7513
5.08273	0.188757	5.09068	0.172801		57	5.07	4.8411	5.3393	4.7537	4.9909	5.1604	5.1167	4.9605	4.7922	4.8583	5.0397	5.0042	5.3091	5.2727	4.9437	5.2243	5.3796	5.1385	5.2996	5.1601		57	5.2195	4.9267	5.1303	4.9909	5.1983	5.1871	5.2343	5.218	4.8743	4.8133	4.7569	5.1387	5.3299	5.3097	4.8741	5.0856	5.0082	5.1274	5.3275	5.0628
5.06967	0.247882	5.03372	0.14785		58	4.9287	4.5722	5.4964	4.7765	4.8355	5.1799	5.2738	5.0328	4.844	4.7286	5.036	5.1026	4.985	4.9795	5.3599	5.3694	5.3894	5.1937	5.03	5.2795		58	5.1997	4.7752	5.1041	4.8922	5.3046	4.9992	5.1504	5.1186	4.7073	5.0632	4.8919	4.8626	5.1565	5.1423	4.9647	5.0762	5.1031	5.1055	5.016	5.0411
5.02672	0.1887	5.01279	0.152708		59	4.9734	4.7699	5.1261	4.7053	5.1687	5.217	4.9652	5.0523	4.5924	4.8384	4.9605	5.2023	5.2455	5.0636	5.196	5.0786	5.1243	4.9431	5.3042	5.0076		59	5.1809	4.9048	4.8885	5.2135	5.1355	5.1004	4.9211	5.0044	4.92	4.8905	4.5916	4.9663	5.2189	4.9703	5.0109	5.0532	5.2582	4.9481	5.0652	5.0134
5.0677	0.164799	5.08198	0.175324		60	5.0381	4.9177	5.3972	5.135	5.1161	5.0366	4.9982	4.9826	4.9335	4.9709	4.9586	4.99	4.9366	5.0996	5.4505	5.407	5.0927	4.9559	4.9129	5.0243		60	5.0061	4.7931	5.1924	5.0034	5.1516	5.1092	5.0843	5.3755	4.9048	5.1747	4.9362	5.1882	5.0697	5.252	4.9554	5.2348	4.9487	5.185	5.3624	4.7122
5.15308	0.26031	5.04988	0.175783		61	5.2208	4.7284	5.7172	5.0523	4.6743	5.1959	5.3078	5.1283	4.9979	4.9396	5.0511	5.1457	4.879	5.2235	5.5821	5.4835	5.271	4.9786	5.2914	5.1933		61	4.8331	4.8141	5.1624	5.0164	5.1184	5.1305	5.0357	5.2388	4.8358	4.9843	4.7594	5.229	5.1272	4.8786	5.1691	5.2584	5.3513	5.1005	4.804	5.1507
5.10852	0.244725	5.10113	0.157366		62	5.1597	4.9132	5.247	5.0803	4.7846	4.9682	4.9358	4.8878	4.633	5.1452	5.2265	5.3704	5.1867	5.3355	5.6197	5.0153	5.024	4.8503	5.3989	5.3883		62	5.0724	4.8199	5.0479	4.8988	5.2798	5.3944	5.2664	5.0995	4.9431	5.3774	4.899	5.1051	5.148	5.1751	4.9979	5.1151	5.1021	5.143	5.2049	4.9327
5.10966	0.228458	5.14165	0.149885		63	4.9918	4.9653	5.4662	4.8431	4.6528	5.2625	5.2065	5.1281	4.8536	5.0618	4.9168	5.2445	5.3774	5.4084	5.3757	4.9253	5.2673	4.931	5.3401	4.9749		63	5.1827	4.8878	5.2261	5.0419	5.1029	5.1735	5.3937	5.085	5.0358	5.0377	4.8592	5.2702	5.0894	5.4092	5.0697	5.1306	5.2184	5.3848	5.1888	5.0456
5.10955	0.20813	5.02704	0.127059		64	5.0223	4.7698	5.5301	5.1185	4.9572	5.5007	5.074	4.8899	4.9752	4.9592	4.9153	5.142	5.2523	5.3328	5.1977	5.1965	5.1979	4.7765	5.2012	5.1818		64	5.0174	4.9463	5.1177	5.003	4.9168	5.2127	4.8475	4.8308	4.9289	4.8636	4.949	5.2615	5.0177	5.1933	4.9971	5.0814	4.957	5.1067	5.0946	5.1978
5.17586	0.235325	5.03359	0.185842		65	5.2368	4.9645	5.1796	5.2143	4.8403	5.5819	5.3445	4.9513	4.7523	4.9517	5.536	5.5364	4.8654	5.2982	5.3478	5.1889	5.2829	5.1277	5.1824	5.1344		65	5.3552	4.873	5.0868	4.9348	4.9772	5.0738	5.0951	5.0825	4.8214	5.0935	4.5391	5.2292	5.3037	5.1483	4.9433	4.8947	4.9042	5.1963	5.1431	4.9765
5.20492	0.233349	5.09364	0.151212		66	5.2045	4.9627	5.611	5.3112	4.9929	5.3665	5.3312	5.1454	4.6135	4.9902	5.183	5.5189	5.0157	5.245	5.3899	5.4223	5.0516	5.0655	5.2476	5.4298		66	4.9025	4.983	5.137	5.2558	4.9696	5.4071	4.9858	5.0175	5.0843	4.9722	4.8108	5.219	5.3051	5.3199	5.0694	5.0031	5.1779	5.1258	5.0388	5.0882
5.23283	0.233586	5.08541	0.130549		67	5.2246	5.2565	5.3513	4.9727	4.984	5.5999	5.573	4.8733	5.0517	5.0784	4.9091	5.2245	5.3489	5.4038	5.5166	5.3718	5.2083	4.9533	5.5873	5.1675		67	5.1405	4.8535	5.1996	5.1559	5.03	5.0175	5.3724	4.8834	4.914	5.0108	4.9388	5.1629	5.0197	5.2126	5.0507	5.1489	5.1101	5.2402	5.1588	5.0878
5.24751	0.273319	5.0907	0.186135		68	5.3944	4.8742	5.3254	5.3783	5.1558	5.4287	5.4663	4.9446	4.9308	5.0858	5.1135	5.5493	5.491	5.3487	5.5454	5.7667	5.2052	4.6613	5.2508	5.0339		68	5.2783	4.8511	4.8959	5.1639	5.1446	5.1996	5.0419	4.9412	4.8608	5.3155	4.7404	5.1948	5.3982	5.2438	5.2508	5.009	5.1288	5.2368	5.0976	4.8209
5.21145	0.204483	5.10882	0.18487		69	5.238	5.2397	5.191	5.3249	4.9105	5.5201	5.5307	5.0937	4.8497	5.0032	5.0584	5.0807	5.4467	5.4492	5.3809	5.4236	5.1758	4.95	5.1253	5.2369		69	5.1202	4.8516	5.0112	5.0013	5.1863	5.2845	5.2255	5.0601	4.7808	5.0656	4.8346	5.3255	5.2673	5.1788	4.9249	5.0287	5.2404	5.2953	5.4888	5.005
5.25961	0.256113	5.0815	0.14154		70	5.464	4.9444	5.2477	5.1678	5.0267	5.4342	5.6257	4.8612	4.8374	5.4119	5.0423	5.6043	5.3896	5.4127	5.0612	5.3206	5.7409	5.2064	5.3102	5.0831		70	4.9593	4.895	5.0854	4.9509	5.2305	5.371	5.0727	4.9844	5.0204	4.8376	5.0572	5.2217	5.3114	5.0561	4.8962	5.095	5.1254	5.0836	5.155	5.2212
5.26698	0.218005	5.03845	0.123037		71	5.3491	5.1319	5.5447	5.3001	5.0526	5.7186	5.3292	5.2463	4.8016	5.0839	4.9646	5.4694	5.2381	5.445	5.3518	5.3173	5.4892	5.1114	5.3344	5.0604		71	5.0362	4.8364	4.8315	5.1711	5.0505	5.2598	4.9617	4.9308	4.9086	5.1944	4.9673	5.1258	5.1165	5.1255	4.958	5.0306	5.1769	5.0161	5.1497	4.9217
5.2767	0.275291	5.08754	0.19869		72	5.3843	4.8656	5.5034	5.0501	4.786	5.6766	5.5922	4.7849	5.1984	5.3838	5.3041	5.1889	5.6597	5.4057	5.3552	5.5348	5.4825	4.9657	5.2464	5.1657		72	5.2777	5.1397	4.9214	5.139	5.0743	5.4066	4.9477	5.1512	4.7962	5.0305	4.8446	4.9612	5.3688	5.408	4.8477	5.235	5.0939	5.2891	5.0248	4.7933
5.25569	0.282431	5.12549	0.130034		73	5.1855	5.6964	5.4644	5.0524	4.6761	5.2497	5.3449	4.8872	5.0878	5.2985	4.9113	5.6476	5.466	5.6522	5.3474	5.3754	5.113	4.9293	5.5579	5.1708		73	5.0365	4.8163	5.1888	5.0344	5.129	5.2251	5.3473	4.9454	4.9927	5.2804	5.1723	5.1429	5.2036	5.2562	4.9947	5.1999	5.2324	5.0285	5.1059	5.1775
5.28412	0.191805	5.0819	0.181596		74	5.294	5.4542	5.4559	5.0495	4.8978	5.4616	5.2243	5.2372	4.79	5.3895	5.1614	5.3583	5.333	5.3698	5.1539	5.3496	5.3985	5.4488	5.5009	5.3541		74	5.1187	5.0821	4.6887	5.1611	5.1688	5.1599	4.9739	4.9921	5.2704	4.9976	4.8024	5.2868	5.1472	5.3253	4.9844	5.0533	5.3284	5.1865	5.1681	4.7424
5.3423	0.287216	5.11468	0.202848		75	5.2262	5.2198	5.4016	5.2476	4.9063	5.895	5.4526	5.1981	4.7476	5.3247	5.0061	5.0467	5.3786	5.5842	5.1993	5.6518	5.6802	5.5563	5.4868	5.6365		75	4.9851	4.5192	5.0706	5.1718	5.1608	5.1519	4.9962	5.1237	5.2137	4.839	5.31	5.3162	5.4106	5.2052	5.0401	5.1229	5.4436	5.0003	5.0961	5.1167
5.26917	0.310365	5.10987	0.172253		76	5.3444	5.3841	5.3115	4.8246	4.8758	5.6743	5.8535	4.7203	4.8598	5.2283	5.0707	5.0475	5.2051	5.3826	5.4652	5.6422	5.6858	5.1799	5.2351	5.3928		76	5.0178	4.7978	4.7547	5.2962	5.26	5.3824	5.1354	4.9671	5.2061	5.1051	4.8721	5.1186	5.2651	5.0566	5.0572	5.2328	5.1681	5.2596	5.2678	4.9768
5.33554	0.306304	5.06966	0.170309		77	5.4061	5.0942	5.335	5.4386	4.8118	6.1783	5.4249	5.2088	5.0336	5.2611	4.7576	5.44	5.1599	5.4778	5.487	5.5737	5.3352	5.2497	5.682	5.3555		77	5.0365	4.6791	4.7712	5.0644	4.9155	5.1468	5.1526	4.9868	5.3131	5.3822	4.9667	5.1159	5.1147	5.1421	5.095	5.0863	5.035	5.1694	5.3005	4.9194
5.37326	0.34827	5.05989	0.206035		78	5.1989	5.4503	5.5349	5.3323	4.7319	5.8759	5.767	5.0209	4.789	5.3812	4.766	5.602	5.6114	5.5246	5.8372	5.6905	5.3965	5.0315	5.4056	5.5176		78	5.0941	4.8653	4.4376	5.0738	5.0281	5.183	4.919	4.8515	5.1144	5.2218	4.8988	5.068	5.2669	5.202	5.0926	5.3274	5.1203	5.1346	5.3549	4.9437
5.34085	0.238769	5.11726	0.230274		79	5.2595	5.1817	5.0985	5.2721	4.9436	6.0408	5.3405	5.2298	5.2324	5.5357	5.0584	5.316	5.659	5.4925	5.1957	5.4781	5.4496	5.2426	5.3402	5.4504		79	4.874	4.756	5.0419	5.1036	4.9515	5.319	4.9839	4.8896	5.2713	5.3155	5.0394	5.1341	5.1676	5.2535	5.078	5.6294	5.1236	5.2551	5.4651	4.6932
5.38483	0.317045	5.05571	0.193978		80	5.3289	5.3553	5.598	5.3692	4.7511	5.7644	5.2439	5.1964	4.8061	5.2189	4.798	5.6635	5.7613	5.5764	5.6326	5.6053	5.7414	5.2403	5.5167	5.5289		80	5.1983	4.6634	4.7965	5.1124	5.0115	5.1243	5.1557	5.1743	5.0644	5.2713	5.0452	4.7826	5.3554	4.8991	4.9287	5.1817	5.3297	5.1842	5.0632	4.7723
5.37088	0.319877	5.13188	0.205438		81	5.3154	5.1083	5.5793	5.3884	5.0872	5.8086	5.5989	4.8617	4.7547	5.4039	4.987	5.48	5.5782	5.5619	6.0514	5.3973	5.3698	5.3183	5.6653	5.1021		81	5.1016	4.8168	5.0011	5.0081	4.9256	5.0862	5.3687	5.0597	5.0853	5.1835	4.9879	5.1524	5.4815	5.1304	5.0031	5.3752	5.6096	5.1524	5.2764	4.8322
5.35157	0.343216	5.07469	0.199669		82	5.5178	5.3444	5.6808	4.9122	4.8887	5.9822	5.4456	5.1194	4.8431	5.0333	4.8554	5.4947	5.9262	5.736	5.4587	5.4795	5.5779	5.1397	5.306	5.2898		82	5.0134	4.8156	4.745	4.8378	5.1659	5.0165	5.1113	5.3575	4.8103	5.1677	5.2485	4.887	5.2202	5.5017	4.9015	5.1268	5.2442	5.1002	5.2021	5.0205
5.40526	0.273384	5.08951	0.219306		83	5.2853	5.412	5.6159	5.7181	5.0841	5.7569	5.4574	5.095	4.6834	5.1379	5.21	5.5717	5.4231	5.4857	5.7985	5.6305	5.4068	5.2438	5.5774	5.5117		83	4.9465	4.9719	4.7704	5.0606	5.0622	5.3163	5.1269	5.0232	5.0112	5.1475	5.0642	5.3202	5.4839	5.462	4.8706	5.0191	5.2871	5.0338	5.2218	4.5908
5.40119	0.25031	5.10223	0.23222		84	5.5522	5.0464	5.4404	5.3267	5.1421	5.7311	5.3975	5.0437	5.2028	5.2541	5.0408	5.6761	5.4799	5.564	5.4965	5.8702	5.5176	5.0627	5.632	5.5471		84	5.3827	4.779	4.8903	5.0576	5.0088	5.1908	4.8411	4.8474	5.262	4.9013	5.4169	4.9843	5.4465	5.4081	4.8344	5.2504	5.311	5.2448	5.1844	4.8029
5.46511	0.291992	5.08676	0.174546		85	5.537	5.496	6.0803	5.3397	5.4273	5.8468	5.3162	4.9117	4.8703	5.5863	5.2014	5.3685	5.5471	5.8731	5.5743	5.4386	5.3062	5.3874	5.7467	5.4473		85	4.9671	5.0797	4.8032	5.2464	4.8238	5.3293	5.1748	4.9673	5.4249	5.1342	4.8865	5.1818	5.2905	5.2149	5.0444	5.1883	5.0976	5.0701	4.9625	4.848
5.37059	0.340332	5.17305	0.205643		86	5.3879	5.2353	5.5843	5.0011	4.9361	5.7064	5.5181	4.8951	4.8051	5.3529	5.0353	5.4636	5.7685	5.3872	5.1915	5.9259	5.8028	5.2699	5.9129	5.2319		86	5.1601	5.118	4.7491	5.0103	4.9317	5.139	5.2002	5.1187	5.3285	5.1906	5.4538	5.1218	5.5507	5.2645	5.3331	5.2289	5.3241	5.2434	5.2764	4.7182
5.44547	0.31239	5.07012	0.194174		87	5.2712	5.196	5.5104	5.3884	5.0313	5.6141	5.6103	4.8546	4.9209	5.7004	5.0736	5.9355	5.789	5.8721	5.6072	5.4766	5.6797	5.264	5.6555	5.4586		87	4.9253	4.7534	4.9224	4.7385	5.0367	5.5647	4.9883	5.0698	5.137	5.1383	5.1636	5.3175	5.2748	5.124	5.0154	5.0838	4.978	4.9912	5.2747	4.905
5.41455	0.374261	5.02018	0.162139		88	5.2749	5.2093	5.4236	5.2458	4.8853	6.0368	5.4561	5.0149	4.5515	5.2103	5.1519	5.4562	5.8408	5.4306	5.6745	6.0659	5.5237	5.3958	5.6488	5.7943		88	5.0669	4.874	4.9865	4.7667	4.7589	4.8633	5.0174	4.9468	5.1731	4.926	5.2097	4.9928	5.1835	4.9243	4.8285	5.2972	5.1711	5.1464	5.2553	5.0152
5.43159	0.370975	5.03873	0.219763		89	5.3373	5.0627	6.0203	5.2707	5.0311	6.0093	5.6021	4.7685	4.8468	5.2523	5.1497	5.7669	5.6373	5.4527	5.4717	5.8634	5.862	5.137	5.4037	5.6862		89	5.0304	4.9244	4.5735	4.8571	5.0234	5.2458	5.0464	4.8638	5.2303	4.9869	4.7563	5.0159	5.5385	5.1798	4.937	5.3831	5.0336	5.1175	5.1823	4.8486
5.41421	0.275823	5.10367	0.180346		90	5.3468	5.2692	5.6241	5.422	5.0423	5.5659	5.6974	4.997	4.8499	5.1666	5.2161	5.5662	5.9748	5.4204	5.5986	5.4243	5.6162	5.2447	5.5349	5.7068		90	5.1547	5.016	5.2386	5.0321	5.0565	5.1633	4.982	5.0471	5.1649	5.1717	4.9937	5.0881	5.6956	5.0423	5.2724	5.1133	5.1433	4.9458	4.9923	4.7598
5.39497	0.367235	5.11506	0.216785		91	5.1984	5.5689	5.8915	5.3509	4.862	6.0185	5.6258	5.2252	4.6215	5.298	5.143	5.1499	6.0779	5.6723	5.3971	5.4196	5.3589	5.0811	5.6975	5.2414		91	5.4393	5.0493	4.8288	4.843	4.813	5.2041	5.1866	5.4498	5.2928	5.0149	5.1214	5.0032	5.3462	5.4581	4.7638	5.0484	5.1764	5.0773	5.2534	4.9314
5.31272	0.268279	5.02401	0.225269		92	5.1196	5.4607	5.3277	5.4019	5.2467	5.8266	5.4022	4.927	4.7679	5.2471	5.0115	5.3928	5.4902	5.5832	5.2724	5.129	5.4883	4.9766	5.7282	5.4547		92	4.9833	4.6935	4.7744	5.216	4.9053	5.1559	4.8637	4.8276	5.3323	4.9431	5.0536	4.8655	5.3515	5.1873	5.1032	5.2924	4.965	5.0943	5.32	4.5523
5.36124	0.283937	5.07408	0.187031		93	5.5347	5.3287	5.587	5.101	4.894	5.6239	5.9382	5.1509	5.0695	5.3029	4.8286	5.1311	5.6685	5.4048	5.5917	5.6589	5.3723	5.2067	5.3053	5.5261		93	4.98	5.1883	5.101	5.0501	4.7787	5.4144	5.0106	5.0381	5.0044	5.2719	4.9161	5.153	5.3493	5.1409	5.0122	5.1545	5.3235	4.906	5.033	4.6555
5.32409	0.290492	5.11121	0.199298		94	5.2533	5.4292	5.5784	5.2272	4.7916	5.7193	5.3131	4.9897	4.7824	5.4607	4.9462	5.6223	5.4525	5.429	5.8056	5.0781	5.5526	5.1862	5.4725	5.3919		94	5.2628	5.0178	4.9055	5.0837	5.1563	5.1112	5.3141	5.0827	5.4673	5.3251	4.753	4.8887	5.4418	5.036	5.0135	5.0728	4.996	5.0643	5.3842	4.8475
5.35655	0.27518	5.06731	0.249148		95	5.3234	5.1425	5.4256	5.3636	5.0026	5.9507	5.3515	4.9305	5.2275	5.3754	5.0172	5.6335	5.2956	5.4467	5.5192	5.2727	5.3636	5.0003	5.8946	5.5943		95	5.1897	4.8812	4.7215	5.2602	4.7908	5.5423	4.6423	4.8758	5.1012	5.0267	5.0903	5.1014	5.3821	5.2667	4.9119	5.2143	5.2475	5.1986	5.2572	4.6445
5.37326	0.273262	5.11843	0.236382		96	5.512	5.4678	5.3491	5.5163	4.8471	5.6135	5.3526	4.9322	5.5608	5.2806	5.2437	5.6037	5.425	5.6112	4.9347	5.3946	5.3131	5.0197	5.9324	5.555		96	5.2402	4.8481	4.5865	5.2067	4.738	5.2748	5.2754	5.0358	5.3054	5.2346	4.9404	5.1374	5.5183	5.3541	5.1768	5.1307	5.2491	5.1246	5.2564	4.7354
5.4038	0.239238	5.04969	0.164186		97	5.5156	5.4138	5.7235	5.4439	4.982	5.7739	5.7496	5.0395	5.2078	5.1732	5.2684	5.5231	5.377	5.5031	5.4207	5.6298	5.4849	5.0187	5.5908	5.2367		97	5.2149	5.0657	4.6656	4.9378	4.9535	5.2422	5.0498	4.9775	5.0254	4.9389	4.9823	4.9673	5.3675	5.2336	4.8563	5.089	5.1193	5.1121	5.2733	4.9218
5.43921	0.205402	5.12189	0.255945		98	5.4062	5.3127	5.3732	5.5581	5.0383	5.4348	5.6916	5.2057	5.2355	5.4962	5.313	5.5273	5.6241	5.3057	5.6082	5.5288	5.7152	5.1893	5.868	5.3524		98	5.1726	5.1687	4.4815	5.0576	4.7735	5.0427	5.3497	5.0576	5.1492	4.9321	5.071	5.5081	5.4238	5.3243	4.9428	4.9056	5.4263	5.3647	5.3551	4.9309
5.36121	0.290408	5.1294	0.21708		99	5.4099	5.1615	5.3954	5.1378	5.0473	5.8042	5.4638	5.1115	4.6944	5.4279	5.1786	5.3917	5.773	5.5763	5.5014	5.2915	5.5651	4.945	5.6136	5.7343		99	5.2631	5.0519	4.942	5.1928	4.9756	5.2518	5.0323	5.2246	5.4186	5.2661	4.863	5.2511	5.4168	5.3044	4.9466	4.8503	5.0917	5.2046	5.4276	4.6131
5.3259	0.271009	5.13721	0.226919		100	5.3493	5.3987	5.176	5.9281	4.8513	5.1388	5.4488	5.0498	5.0166	5.523	5.0475	5.4209	5.4366	5.3429	5.329	5.4394	5.1646	5.0355	5.7142	5.7071		100	5.128	5.1039	4.7253	5.4072	4.873	5.5322	4.7941	5.0943	5.057	5.1178	5.1036	5.198	5.473	5.3585	4.8704	5.2175	5.4095	5.1526	5.2271	4.9011
5.42812	0.274259	5.15728	0.279515		101	5.2079	5.3069	5.9124	5.345	4.8224	5.9003	5.5092	5.3485	5.2444	5.6813	5.1173	5.4661	5.4542	5.4304	5.7942	5.4688	5.5439	5.0426	5.5867	5.38		101	5.0581	5.049	4.6516	5.2574	4.6783	5.3696	5.1976	4.9209	5.4129	5.3432	4.9673	5.55	5.3425	5.6257	4.9085	5.1534	5.2863	5.0177	5.5112	4.8444
5.45901	0.365578	5.13577	0.264553		102	5.3639	5.3942	6.0149	5.5254	4.9209	5.8588	5.4445	5.0724	4.8962	5.3676	5.2703	5.4575	5.2384	5.7842	5.6451	5.8557	5.6177	4.7567	6.0547	5.6411		102	5.1867	4.9694	4.6919	5.1978	4.8151	5.2456	5.0897	5.106	5.6554	5.3241	4.9855	5.2526	5.2908	5.4795	5.1593	5.4953	4.8832	5.0855	5.2096	4.5924
5.37698	0.245061	5.15372	0.240749		103	5.2701	5.0964	5.5856	5.6815	5.2444	5.4133	5.4758	5.0134	5.2627	5.2439	5.0109	5.3956	5.4237	5.4016	5.6197	5.1261	5.8444	5.0984	5.6468	5.6854		103	5.04	5.2203	4.6252	4.8987	4.8407	5.0758	5.2085	5.191	5.2851	5.3194	5.1155	5.1912	5.4233	5.4775	5.0406	5.1111	5.3746	5.4048	5.4874	4.7436
5.38053	0.233498	5.13488	0.219491		104	5.3197	5.0712	5.3005	5.5963	5.0185	5.3509	5.5581	5.1032	5.6074	5.4668	4.9565	5.703	5.2635	5.6534	5.3666	5.2165	5.6542	5.2299	5.6204	5.554		104	5.2876	5.0297	4.7952	5.0823	4.7001	5.2942	5.0609	4.9685	5.092	5.2996	5.12	5.1047	5.5129	5.2512	4.9959	5.1095	5.487	5.2358	5.4307	4.8398
5.3817	0.222968	5.16375	0.218529		105	5.3486	5.2074	5.5899	5.4811	4.6916	5.5079	5.4594	5.2609	5.6015	5.145	5.1707	5.5989	5.4149	5.646	5.3673	5.3027	5.507	5.2691	5.5371	5.527		105	5.2392	4.9417	4.996	5.0658	4.6839	4.9736	5.1395	5.0994	5.4462	5.0949	5.1298	5.2706	5.5737	5.3973	5.3903	5.1427	5.2309	5.1291	5.4535	4.8768
5.40131	0.298661	5.22232	0.234641		106	5.5176	5.136	5.516	5.2805	4.6751	6.1162	5.5531	5.2521	5.2233	5.1934	5.0568	5.4244	5.5422	5.4718	5.569	5.3893	5.4173	5.225	5.73	5.7371		106	5.2039	5.1943	4.7955	5.1515	4.675	5.3283	5.2465	5.1552	5.2297	5.4835	4.8032	5.3027	5.5503	5.5145	5.2618	5.3118	5.354	5.3203	5.4478	5.1165
5.30523	0.244738	5.2155	0.325772		107	5.3784	5.1913	5.3301	5.5378	4.8115	5.3509	5.2728	4.7047	5.2814	5.1216	5.3925	5.739	5.2526	5.2238	5.3444	5.5928	5.4153	5.2528	5.6475	5.2634		107	5.1429	4.9522	4.6839	5.1777	4.6738	5.2902	5.2445	5.0669	5.701	5.489	4.7318	5.663	5.741	5.2403	5.2362	5.2498	5.4385	5.4809	5.3176	4.7887
5.44991	0.28153	5.17012	0.303919		108	5.4524	5.4259	5.5059	5.1673	5.1108	6.1485	5.3305	4.9557	5.5324	5.6575	5.5253	5.6086	5.4382	5.8041	5.4902	5.2243	5.2217	5.0761	5.763	5.5599		108	5.1701	5.0577	4.1687	5.1421	4.9112	5.3285	5.3565	5.1179	5.0755	5.3667	4.9677	5.3171	5.5099	5.2177	5.2003	5.274	5.5394	5.4983	5.3293	4.8537
5.37735	0.246201	5.24539	0.287054		109	5.1306	5.2378	5.2344	5.5966	4.9568	5.6287	5.3865	5.3192	5.4932	5.3269	4.9495	5.6321	5.3341	5.6819	5.4908	5.3695	5.751	5.0478	5.7289	5.2507		109	5.3488	5.1773	4.6971	5.2913	4.7636	5.3901	5.1272	5.0378	5.5048	5.1621	5.4098	5.4708	5.4196	5.3812	5.2292	5.3631	5.8372	5.1127	5.4842	4.6999
5.41574	0.191346	5.16458	0.25722		110	5.4228	5.1992	5.3742	5.6649	5.1197	5.7844	5.2702	5.3559	5.5851	5.1928	5.3164	5.4116	5.6316	5.6137	5.5344	5.318	5.223	5.3221	5.6908	5.2841		110	5.2044	5.0483	4.9024	5.6654	4.6912	4.9691	5.3839	5.2035	5.3257	5.0126	5.0493	5.2358	5.4808	5.3111	4.9782	5.2943	5.3604	5.0146	5.4643	4.6962
5.37445	0.21387	5.12228	0.228768		111	5.2818	5.0887	5.6401	5.1204	4.9776	5.3058	5.5584	5.3532	5.545	5.3421	5.236	5.3067	5.5715	5.5299	5.4547	5.3094	5.6662	5.0475	5.728	5.426		111	5.2637	5.2318	4.9999	4.9238	4.9966	5.3973	5.5245	5.0033	5.4243	4.897	5.0893	4.9184	5.2352	5.2286	4.8005	5.3198	5.2223	4.8839	5.3666	4.7187
5.34449	0.280712	5.16524	0.258139		112	5.2172	5.2461	5.2362	4.9344	4.8077	5.7146	5.2116	5.0349	5.4064	5.4897	5.0845	5.5291	5.6045	5.5021	5.4291	5.3031	5.476	5.0782	5.9258	5.6587		112	5.1263	4.9301	4.6934	5.3584	4.7534	5.3534	5.3116	5.1264	5.2514	5.1881	4.581	5.4245	5.3871	5.2856	5.3094	5.3935	5.0851	5.1382	5.5516	5.0563
5.32541	0.176167	5.24706	0.223996		113	5.3237	5.0498	5.3836	5.1943	4.9354	5.5327	5.397	5.4443	5.2883	5.3797	5.1164	5.3105	5.4258	5.6162	5.203	5.5057	5.4278	5.1874	5.5509	5.2357		113	5.4016	5.242	4.7616	5.4814	4.9023	5.4585	5.3025	5.1473	5.1751	5.221	5.1962	5.2774	5.4162	5.5616	5.1122	5.4162	5.1403	5.4807	5.4253	4.8219
5.37504	0.254714	5.19921	0.234577		114	5.1622	5.4551	5.5544	5.3871	4.9659	5.4494	5.2398	5.0241	5.573	5.5464	5.1115	5.265	5.3381	5.6463	5.4774	5.2214	5.7026	4.9376	5.8561	5.5874		114	5.1267	4.9391	4.7124	5.4312	4.7221	5.3295	5.3104	4.932	5.3394	5.2129	5.1303	5.5289	5.3822	5.3249	5.2565	5.4317	5.381	5.0991	5.3846	5.0093
5.33858	0.262288	5.17013	0.245385		115	5.1722	5.0551	5.6773	5.267	4.882	5.744	5.2094	5.3022	5.7495	5.2567	5.0193	5.3279	5.3211	5.434	5.4505	5.1924	5.4895	5.0127	5.8248	5.384		115	5.2035	5.0722	4.7992	5.2813	4.7097	5.4353	5.2924	5.1993	5.155	5.4467	5.0364	5.0522	5.4071	5.1578	5.4727	5.0389	5.538	4.8873	5.4161	4.8015
5.37116	0.250503	5.22545	0.277817		116	5.1817	5.1768	5.5443	5.2342	4.8422	5.5293	5.734	5.2367	5.1727	5.2648	5.1005	5.389	5.4656	5.5572	5.4888	5.3903	5.9397	5.1747	5.6384	5.3623		116	5.3427	4.9871	5.0231	5.5594	4.6166	5.5357	5.6052	5.2473	5.2603	5.6441	4.9966	5.0345	5.5122	5.5556	5.1331	5.1645	5.0743	5.1413	5.2147	4.8608
5.36161	0.226249	5.16699	0.257429		117	5.3291	5.2199	5.3358	5.262	4.863	5.418	5.4984	4.9486	5.5078	5.4078	5.1902	5.3116	5.5219	5.4224	5.6531	5.3889	5.5849	5.0499	5.7087	5.6102		117	4.8124	4.9965	5.0958	4.9938	4.8153	5.1761	5.341	4.9273	5.4131	5.1336	5.0369	5.2812	5.1978	5.3028	5.6487	5.3928	5.322	5.2494	5.5622	4.641
5.41775	0.264447	5.21683	0.312845		118	5.5217	4.9706	5.3596	5.3691	4.8237	6.0493	5.4289	5.2915	5.4893	5.4777	5.1306	5.3615	5.5254	5.488	5.6108	5.5575	5.742	5.2066	5.5764	5.3747		118	5.4664	5.0204	4.6428	5.7446	4.7006	5.4978	5.3061	4.9677	5.3476	5.4402	4.9086	5.3314	5.5748	5.3319	5.4337	5.1608	5.2435	5.1603	5.4119	4.6454
5.41629	0.256956	5.24284	0.275201		119	5.2422	5.3162	5.4302	5.5537	5.2232	5.8658	5.5958	5.0579	5.2465	5.2647	5.3645	5.4569	5.5688	5.6226	5.382	5.695	5.8222	4.7993	5.5653	5.2531		119	5.5175	4.9912	4.583	5.7831	5.0733	5.3612	5.31	5.2128	5.3206	5.1324	5.0332	5.2571	5.5408	5.3864	5.3908	5.2391	5.4103	5.0993	5.4578	4.7568
5.38819	0.243419	5.15711	0.200852		120	5.3629	5.1298	5.6843	5.3624	5.1848	5.5597	5.2565	5.3694	5.1422	5.44	5.1057	5.4944	5.2959	5.4099	5.6239	5.4586	5.8326	4.8073	5.7047	5.5388		120	5.1317	4.9022	4.9604	5.0878	4.7894	5.2992	5.2789	5.0367	5.4406	5.5103	5.1424	4.9111	5.3401	5.1584	5.3529	4.9946	5.174	5.1347	5.4618	5.0349
5.3589	0.263608	5.23715	0.259107		121	5.4098	5.1191	5.5788	5.4174	4.8119	5.8785	5.1578	5.2524	5.2093	5.5159	4.9879	5.3514	5.6137	5.617	5.5343	5.6943	5.3738	5.0113	5.367	5.2764		121	5.3729	5.1396	4.9203	5.0856	4.8115	5.4755	5.3924	4.879	5.3996	5.2027	5.3275	5.4003	5.4052	5.4472	5.4108	4.9752	5.4742	5.181	5.6906	4.7519
5.35606	0.227245	5.16272	0.249679		122	5.0707	5.1788	5.5739	5.3795	4.8403	5.3111	5.6748	5.3214	5.4806	5.3878	5.113	5.3024	5.414	5.5517	5.5326	5.6542	5.4349	4.9612	5.5731	5.3652		122	5.0985	5.1086	4.7037	5.2738	4.7746	5.5971	5.1787	4.9722	5.4475	5.2989	5.0823	4.9843	5.2997	5.1875	5.3209	5.3228	5.3464	5.2882	5.3431	4.6256
5.36219	0.26679	5.19841	0.28457		123	5.2739	5.1792	5.973	5.4365	5.0338	5.5928	5.2634	5.2703	5.1257	5.0634	5.4979	5.3938	5.5867	5.2978	5.7209	5.3125	5.5423	4.7953	5.577	5.3075		123	5.4471	4.8349	5.0786	5.5661	4.7437	5.3554	5.728	5.3472	5.0624	5.1026	4.7949	5.4719	5.3475	5.3336	5.3765	5.0155	5.2169	5.2403	5.2417	4.6635
5.41889	0.241558	5.25464	0.257037		124	5.3078	5.1186	5.4872	5.0535	4.9843	5.7602	5.3708	5.331	5.3786	5.4583	5.1861	5.5901	5.7081	5.6861	5.593	5.5176	5.5357	5.0346	5.7198	5.5564		124	5.3766	5.0101	4.6347	5.1227	4.8314	5.2676	5.5923	5.1326	5.496	5.4075	5.3882	5.3708	5.5098	5.3511	5.5914	5.0944	5.3908	5.1821	5.4021	4.9405
5.3619	0.228362	5.2094	0.290704		125	5.1984	5.0928	5.4882	5.1607	4.7665	5.7419	5.4613	5.2596	5.342	5.2829	5.193	5.3971	5.5208	5.6049	5.543	5.7459	5.4457	5.3259	5.3844	5.283		125	5.1828	4.8488	4.6303	5.5615	4.7588	5.3193	5.2015	5.0462	5.6858	5.4723	5.1016	5.2201	5.6287	5.2817	5.3406	5.0881	5.4588	5.0827	5.4264	4.8521
5.35948	0.248561	5.21224	0.267557		126	5.3901	5.2494	5.5427	5.2996	4.8793	5.8777	5.3477	5.0246	5.4466	5.3082	4.8828	5.3317	5.6124	5.469	5.3731	5.589	5.1662	5.2493	5.612	5.5382		126	5.1869	4.939	4.8059	5.3231	4.9523	5.4186	5.5455	4.8619	5.5617	5.1178	5.2055	5.3255	5.5833	5.1695	5.6773	5.1888	5.1887	5.0063	5.4036	4.7837
