# Supplementary material for: Hypoxia controls plasma membrane targeting of polarity proteins by dynamic turnover of PI4P and PI(4,5)P2
Source: eLife. 2022 Jun 9;11:e79582. doi: 10.7554/eLife.79582 (PMC9242647; doi:10.7554/eLife.79582)
Supplement: Figure 5—source data 4. [file elife-79582-fig5-data4.xlsx]

## Sheet: Figure 5-fig supp 1B
Figure 5 Souce Data 4
						1	2	3	4	5	6	7	8	9	10	11	12	13	14	15	16	17	18	19	20	21	22			1	2	3	4	5	6	7	8	9	10	11	12	13	14	15	16	17	18	19	20
RBO-GFP		PLC-PH::RFP			RBO-GFP
AVG	STDEV	AVG	STDEV																										PLC-PH::RFP
C2_PM/Cy	C2_PM/Cy	C1_PM/Cy	C1_PM/Cy		min	C2_PM/Cy	C2_PM/Cy	C2_PM/Cy	C2_PM/Cy	C2_PM/Cy	C2_PM/Cy	C2_PM/Cy	C2_PM/Cy	C2_PM/Cy	C2_PM/Cy	C2_PM/Cy	C2_PM/Cy	C2_PM/Cy	C2_PM/Cy	C2_PM/Cy	C2_PM/Cy	C2_PM/Cy	C2_PM/Cy	C2_PM/Cy	C2_PM/Cy	C2_PM/Cy	C2_PM/Cy		min	C1_PM/Cy	C1_PM/Cy	C1_PM/Cy	C1_PM/Cy	C1_PM/Cy	C1_PM/Cy	C1_PM/Cy	C1_PM/Cy	C1_PM/Cy	C1_PM/Cy	C1_PM/Cy	C1_PM/Cy	C1_PM/Cy	C1_PM/Cy	C1_PM/Cy	C1_PM/Cy	C1_PM/Cy	C1_PM/Cy	C1_PM/Cy	C1_PM/Cy
2.45497	0.144797	1.9031	0.281836		1	2.5518	2.5138	2.0998	2.3182	2.3655	2.4996	2.633	2.6031	2.5367	2.2211	2.3839	2.488	2.5498	2.4302	2.5375	2.6281	2.3107	2.7151	2.423	2.3533	2.3833	2.4639		1	1.4615	2.053	2.1597	1.5016	1.7026	1.6039	2.3778	1.8421	2.0217	1.781	2.2898	2.0498	1.9239	1.7472	2.3912	2.0716	2.2021	1.7542	1.5687	1.6716
2.339	0.150113	2.06815	0.4192		2	2.4243	2.2288	2.3175	2.2827	2.1534	2.3112	2.661	2.28	2.1719	2.3852	2.6412	2.4077	2.4615	2.1651	2.2074	2.4138	2.5963	2.2458	2.2522	2.2731	2.1847	2.3932		2	2.0142	1.7616	2.3379	1.7291	2.0377	2.2053	3.1946	1.9886	1.4692	2.1386	2.6615	1.9722	1.8607	1.8462	2.9051	2.1761	2.2428	1.9293	1.4697	1.9393
2.08387	0.0895127	1.88337	0.343186		3	2.0958	2.0737	1.8996	2.1153	1.9488	2.1367	2.0689	2.0037	2.1749	2.2575	2.1036	2.1029	2.004	2.2041	2.068	2.0323	2.0882	2.0352	2.0287	2.0715	2.0577	2.2741		3	1.7773	1.4473	1.7754	1.7616	1.8012	1.7214	1.8488	1.9348	1.8952	2.7725	2.2243	1.8896	1.6898	2.0915	2.7431	2.1086	1.9429	1.5902	1.6723	1.454
1.9009	0.0816513	1.89701	0.214992		4	1.9779	1.8215	1.9402	1.8404	1.7397	1.9721	1.8919	1.9855	1.7547	1.9479	1.9818	1.9207	1.8898	2.0419	1.9471	1.8139	1.8358	1.9324	1.9703	1.9279	1.9008	1.7857		4	1.7892	2.154	2.0284	1.6943	1.8257	1.7746	1.8198	1.8746	1.7181	2.2382	1.9914	2.0283	1.734	2.0577	2.1873	1.9537	2.2623	2.0003	1.8347	1.6406
1.88669	0.122971	2.01508	0.251748		5	1.8588	1.8138	1.9098	1.8326	2.2061	1.8747	1.8939	2.007	1.7768	1.7417	1.8422	1.8682	2.1114	2.0821	1.8743	1.8211	1.7133	1.8973	1.8785	1.7818	1.7604	1.9613		5	1.9701	2.1609	2.3355	2.1608	2.272	1.8121	2.0087	1.8634	1.5495	1.7714	1.9663	2.6225	2.0985	2.208	2.2731	1.9675	1.8151	2.2593	1.7587	1.7697
1.92368	0.080885	2.10025	0.2243		6	2.0784	2.0839	1.8504	1.9284	1.8072	1.8996	1.9729	1.9957	1.7911	1.9093	1.9972	1.9728	1.8759	1.9002	1.9655	1.9986	1.8169	1.9565	1.8924	1.9182	1.8242	1.8856		6	1.9056	2.1094	2.3196	2.2536	1.8429	1.8136	1.8427	1.9144	1.7755	2.562	2.2772	2.1937	2.0313	2.2687	2.206	2.5096	2.1099	2.315	1.9113	1.9087
1.92403	0.0807855	2.1522	0.352582		7	2.0658	2.0339	1.8812	1.958	1.834	1.7845	2.0182	1.9665	1.8672	1.9424	2.0131	1.8725	1.8524	1.9741	2.0127	1.8358	1.9074	1.9267	1.7689	1.9671	1.9222	1.924		7	2.1939	2.2975	2.3383	1.9338	2.0805	1.8571	2.3137	1.8371	1.3951	2.5381	2.9369	2.475	2.1837	2.0952	2.1156	2.5567	2.4357	2.363	1.5026	1.9024
1.95458	0.142878	2.02397	0.385981		8	1.9936	1.8151	2.0477	1.7923	1.9988	1.7561	1.9745	2.0018	1.831	2.0258	2.1817	1.9319	2.0452	2.0408	2.3259	2.0245	1.9356	1.9609	1.757	1.9362	1.9059	1.7185		8	1.7371	2.5564	2.4742	1.7002	2.0568	1.7399	1.9811	1.7925	1.4872	2.2986	2.365	2.3067	1.8763	2.132	2.5456	2.5944	1.9684	2.2899	1.3186	1.794
1.90024	0.0951613	2.05612	0.368717		9	1.8109	2.0101	1.8906	1.7563	1.9351	1.8799	1.864	1.9122	1.7571	1.9348	1.9131	1.9477	2.0833	2.0713	2.0401	1.9422	1.8118	1.9421	1.7847	1.8213	1.8901	1.8066		9	1.7161	2.121	2.2391	1.8439	2.206	2.1896	2.3396	1.9874	1.5866	2.0841	2.5509	2.6665	1.925	2.5572	2.5721	2.1937	2.0067	1.8881	1.1471	1.6686
1.91456	0.09719	2.05795	0.370962		10	1.8845	1.9267	1.949	1.8983	2.0088	1.7536	1.9203	1.8318	1.6885	2.004	2.0221	1.9101	1.9699	2.0674	1.9563	1.9278	1.7648	2.0681	1.8674	1.9617	1.8512	1.8881		10	1.9682	2.0852	2.3089	2.1649	2.3685	1.6078	2.487	1.8853	1.6163	1.9143	2.2242	2.6038	1.8952	2.244	3.0297	2.1634	2.0835	2.0142	1.5642	1.5388
1.91563	0.116545	2.13071	0.41024		11	1.856	1.7627	1.9319	1.8434	1.872	1.8426	2.0416	1.971	1.9347	1.9445	2.2858	1.848	1.8366	2.0333	1.9774	1.976	1.7394	1.9078	1.79	1.93	1.8421	1.9771		11	1.8453	2.2493	2.2841	1.6632	2.2657	2.0268	2.3412	1.7038	1.9048	2.1629	2.5523	2.2808	1.7244	2.634	3.3519	2.3788	1.7836	2.2418	1.5307	1.7695
1.96366	0.144805	2.05584	0.341655		12	1.9976	1.9027	1.9152	2.0081	1.8629	1.9361	2.2757	1.8866	1.8672	1.8994	2.0212	1.8334	2.1517	1.8997	2.258	2.2525	1.9546	1.9252	1.8891	1.8659	1.7621	1.8356		12	1.8324	1.8069	2.4562	1.7738	2.2753	1.6592	2.2633	2.097	1.571	2.0581	2.0418	2.1098	1.8199	1.957	2.6744	2.938	2.354	2.0818	1.7152	1.8819
1.94474	0.130523	2.04457	0.382388		13	1.8579	1.7552	1.8777	1.9555	1.8062	2.1057	2.1821	1.9272	1.929	1.8769	1.9744	1.9269	1.9599	1.967	2.2147	1.9315	1.9798	2.1621	1.8323	1.8272	2.0111	1.7239		13	1.6846	2.2104	2.2813	1.9006	1.7987	2.3615	2.3526	1.9327	1.2377	2.2931	1.9521	2.1827	1.5982	2.2099	2.873	2.7028	2.3806	1.8486	1.602	1.814
1.95556	0.108459	2.15558	0.408245		14	1.863	2.035	1.9213	1.9808	1.9051	2.1661	1.9884	1.8071	1.8348	2.0762	1.9727	1.9348	2.1601	1.9296	1.9731	1.8504	1.9663	1.9553	1.819	2.154	1.8336	1.8956		14	1.7489	2.3368	2.7502	2.2849	2.6755	2.2936	2.3927	1.8583	1.0257	2.4054	2.0096	2.1557	1.7849	2.2737	2.6365	2.2828	2.4606	2.0112	1.5901	2.2127
1.92574	0.111781	2.13713	0.332211		15	1.888	1.891	1.8354	1.8136	1.996	1.9458	2.1639	1.7874	1.964	2.0342	1.9316	1.9755	2.0702	1.8972	2.0678	1.8294	1.839	1.9549	1.8182	2.0937	1.8235	1.7459		15	1.5914	2.4409	2.4867	2.0073	2.4296	1.9992	2.3455	1.7729	1.4986	2.3327	2.4189	2.3684	2.3073	1.941	2.2997	2.4161	2.3668	2.0129	1.3397	2.227
1.92163	0.10596	2.15943	0.344511		16	2.0543	1.9644	1.9499	1.7333	1.9256	1.9279	2.0285	1.995	1.928	1.7096	2.0164	1.888	1.9871	2.036	1.9929	1.9463	1.7033	2.0291	1.877	1.8287	1.9524	1.8022		16	2.2286	2.192	2.3065	1.828	1.7653	2.0507	2.3076	2.2188	1.6412	2.3784	2.6543	1.8773	2.0038	2.3437	2.7212	2.816	2.119	2.1876	1.511	1.7203
1.91094	0.133291	2.01965	0.414404		17	1.8997	1.9047	1.8736	1.8184	1.9607	1.992	1.7837	1.9071	1.8238	1.7309	2.0046	1.9704	1.9587	2.2464	2.1742	1.9071	1.7207	2.0809	1.7719	1.837	1.8216	1.8525		17	1.9636	1.7761	2.1194	2.0426	1.8406	1.8521	2.0293	1.8998	1.2757	2.0387	2.2022	2.5485	1.9623	2.7313	2.8772	2.7835	1.893	2.1677	1.482	1.6888
1.94287	0.160818	2.06921	0.31639		18	1.9256	1.8629	2.0944	1.7605	2.0005	2.0536	2.4011	2.0816	1.9045	1.7699	1.995	1.9727	1.8015	1.8762	2.233	1.8101	1.8064	1.9933	1.8243	1.963	1.7804	1.8327		18	2.2401	1.7724	2.1436	2.0382	2.2443	2.3294	2.1009	1.963	1.2468	1.9091	2.0919	2.3075	1.672	2.4036	2.7766	2.0992	2.3692	2.1249	1.5791	2.0301
1.92605	0.124881	2.10712	0.422804		19	1.7705	1.9603	1.877	1.8638	2.0115	2.124	2.1803	1.9109	1.8593	1.8537	1.9814	1.8855	1.8576	1.895	2.0438	2.0104	2.1234	1.7706	1.8479	2.0249	1.8305	1.6908		19	1.7281	1.857	2.3866	2.4425	2.0977	2.4404	2.7025	1.9615	1.4404	2.3611	2.5122	2.0983	1.4158	2.7086	2.3839	2.51	2.3947	2.2285	1.3614	1.931
1.94874	0.140801	2.11166	0.387359		20	1.8281	1.9334	2.1247	2.0014	1.8233	2.1272	1.8108	1.8847	1.7388	2.0821	2.007	1.8846	2.0107	2.1474	2.0955	2.1479	2.0819	1.8216	1.7328	1.9351	1.9063	1.747		20	2.0329	1.8878	2.3966	2.202	2.2001	2.461	2.2072	1.7023	1.3773	2.4499	2.3125	1.9166	1.973	2.4033	2.5249	2.6841	2.8812	1.9935	1.4576	1.8412
1.91185	0.110269	2.01516	0.27781		21	1.9005	1.7786	1.9707	1.8534	1.8294	1.8661	1.8447	1.984	1.9627	1.9796	2.0083	2.0671	1.8217	2.1896	1.7568	1.9389	1.8689	2.029	1.7358	1.9629	1.8015	1.9105		21	1.9992	2.0898	2.2424	1.765	2.378	2.0218	1.9292	1.6004	1.8962	2.2598	2.1081	2.2451	1.9201	2.1577	1.8517	2.1367	2.6109	1.8587	1.4235	2.1339
1.89323	0.10732	1.97158	0.303535		22	1.6934	1.8957	1.9664	1.8779	1.879	1.8615	1.8449	1.8267	2.0228	1.8992	1.9245	1.9604	1.8948	2.2119	1.8339	1.8568	1.9664	1.9556	1.6899	1.8724	1.8027	1.9142		22	1.9447	2.2292	2.0864	1.7644	1.8869	2.2218	1.8345	1.5813	1.2409	1.9134	2.1372	2.4823	1.8145	2.1569	2.4489	2.1138	2.2303	2.1181	1.5031	1.6278
1.92933	0.122032	2.0861	0.389269		23	1.8774	1.9706	2.0583	1.6722	1.8212	1.9443	1.9857	1.8353	2.0105	1.7809	2.0429	1.9085	1.9096	2.2198	1.9574	1.9093	1.981	2.1222	1.8619	1.9269	1.7638	1.8855		23	1.8151	2.2919	2.5045	1.8231	1.906	2.2302	2.2533	1.8404	1.4882	1.9049	2.4278	2.159	1.9436	2.3497	2.4561	2.6362	2.9941	2.0775	1.4129	1.5843
1.89393	0.126904	1.9793	0.310532		24	1.8279	1.8936	1.7932	1.7816	1.8071	1.9695	2.1621	1.8161	2.0791	2.0273	1.8982	1.7899	2.039	2.1575	1.9025	1.7469	1.87	1.8742	1.7668	1.7964	1.7601	1.9074		24	1.537	2.4815	1.9375	1.7682	2.0914	2.2127	2.0924	1.4942	1.9812	2.1533	2.3217	1.8216	1.6504	2.0431	2.3571	2.1788	2.5389	1.821	1.3848	1.7513
1.8955	0.124573	1.9386	0.368509		25	1.7162	1.929	1.887	1.9121	1.8371	1.8816	2.1622	1.8849	1.7222	2.0007	2.01	1.9092	1.9032	2.1711	1.8698	1.9609	1.8482	1.926	1.7184	1.9114	1.8586	1.6812		25	1.8388	2.3589	2.0928	1.5556	1.7966	1.7513	2.1819	1.6853	1.371	2.088	2.627	1.8918	1.6328	1.8911	2.7471	2.4923	1.9329	1.9559	1.3431	1.8056
1.8963	0.109569	1.89978	0.328395		26	1.883	1.9514	1.9499	1.8397	1.7322	1.8413	1.8649	1.8815	1.9203	1.8043	2.1275	1.9175	1.8343	2.0522	2.0904	1.9081	1.8727	1.9896	1.7046	1.9938	1.7858	1.7737		26	1.8921	2.0723	2.1651	1.6435	1.6596	1.9782	1.7884	1.6565	1.6188	1.9965	2.6001	2.1781	1.5173	2.1633	1.8938	2.523	1.7346	2.2923	1.2511	1.795
1.90939	0.124127	1.97988	0.361792		27	1.8871	2.0845	1.9615	1.729	1.8785	1.8782	1.9451	1.925	1.8336	1.7356	2.1597	1.8871	1.8433	2.0504	2.1727	1.9835	1.9007	1.9226	1.761	1.8674	1.7385	1.8616		27	2.0546	2.3265	2.4497	1.8771	2.3113	1.8989	1.7249	1.4909	1.4705	2.0798	2.5358	1.8919	1.4109	2.1486	2.2377	2.634	2.1618	2.0654	1.367	1.6641
1.91339	0.105828	1.89657	0.293174		28	1.8068	1.9909	1.9406	1.7782	1.8253	1.9348	1.971	1.9629	2.0155	2.0885	2.0509	1.9108	1.8488	2.0473	2.0055	1.8993	1.7808	2.0058	1.8753	1.89	1.7507	1.7148		28	1.8464	1.946	2.1601	1.7341	1.6206	2.3244	1.9988	1.689	1.9099	1.8381	2.6487	1.8648	1.8072	2.1941	2.0316	2.2788	1.7744	1.8249	1.3323	1.6042
1.87793	0.0990981	1.97085	0.330352		29	1.9067	1.5809	1.9016	1.7927	1.8139	1.9086	1.7691	1.8137	1.8417	1.8816	1.9631	1.8798	2.0041	1.8598	2.0316	1.9678	1.7466	1.9429	1.9334	1.919	1.9107	1.9451		29	2.2177	1.9325	2.2578	1.8111	1.6288	2.2302	1.7096	1.5023	1.6043	1.8925	2.6077	1.8754	2.0341	1.8654	2.4571	2.592	2.1367	2.0414	1.5019	1.706
1.90955	0.0704966	1.87731	0.327986		30	1.9831	1.9371	1.9017	1.8241	1.9207	1.9796	1.9551	1.8933	1.8122	1.915	1.9717	1.8694	1.934	2.014	2.0106	2.0057	1.8608	1.8945	1.8518	1.7912	1.9076	1.777		30	1.5843	1.9351	1.9953	1.7136	1.9198	1.8643	1.9973	1.5067	1.2782	2.0986	2.3663	1.9737	1.6125	1.9317	2.3921	2.4634	2.1538	2.1853	1.3846	1.4783
1.90982	0.0970043	1.9623	0.332367		31	1.8826	1.9999	1.9889	1.8334	1.8623	1.8628	2.1279	1.9614	1.8511	1.8351	1.9674	1.9051	1.9865	1.9813	2.0187	1.8301	1.9138	1.9606	1.6581	1.9126	1.8839	1.7925		31	1.8293	1.9364	2.3015	1.6208	2.2055	2.2576	2.0076	1.6837	1.3137	1.9868	2.4191	2.2751	1.7856	2.1295	2.5069	2.3859	2.0729	1.878	1.3877	1.5175
1.90329	0.106329	1.86703	0.300419		32	1.8457	1.7764	1.8683	1.7776	1.8625	1.9189	1.9903	1.8605	1.8218	1.7996	1.9936	1.8796	1.8391	1.9554	2.176	1.9305	2.0824	2.0869	1.849	1.9089	1.809	1.8404		32	1.7723	1.7901	2.0378	1.7044	1.9006	1.6165	2.0561	1.6096	1.3449	1.6733	2.3697	2.5873	1.454	2.0336	2.1365	2.0542	2.2153	1.8175	1.6424	1.8222
1.88271	0.121537	1.85718	0.293566		33	1.8259	1.9088	1.9303	1.7825	1.782	1.9269	1.7627	1.9174	1.7613	1.7813	1.9273	1.746	2.0191	1.9727	2.1112	1.9184	2.1994	1.9087	1.7377	1.8597	1.7493	1.8911		33	1.552	2.0465	2.116	1.8065	1.6699	1.7938	1.7263	1.3376	1.5969	1.9946	2.235	1.9563	1.5873	1.9624	2.1767	2.1623	2.4742	2.0279	1.4052	1.9523
1.89122	0.127299	1.88889	0.375921		34	1.8033	1.8295	2.1125	1.7703	1.9126	1.8998	1.9296	1.7903	1.8595	2.0393	2.0167	1.857	1.6653	2.1274	2.1272	1.8085	1.9214	1.9	1.749	1.8649	1.7438	1.879		34	1.6252	1.6614	2.2065	1.8079	2.0775	1.9908	2.2663	1.2793	1.5583	2.1235	2.2294	1.9281	1.2237	1.8582	2.9483	1.8786	2.2454	1.9022	1.5601	1.6824
1.91499	0.101901	1.83202	0.287306		35	1.9349	1.9537	2.0207	1.866	1.8688	1.9649	1.9919	1.9717	1.8743	1.7708	2.0432	1.8989	1.7233	2.1274	1.869	2.0153	1.9243	2.0113	1.7893	1.7722	1.8148	1.923		35	1.7943	1.8635	2.1889	1.4681	1.897	1.734	1.9192	1.6696	1.5297	2.0921	2.2437	2.0652	1.3573	1.9366	1.824	2.1475	2.3309	1.9521	1.3316	1.4161
1.88067	0.0928275	1.75665	0.298481		36	1.9984	1.8998	1.9801	1.9595	1.8856	1.8367	1.8735	1.7872	1.8075	1.8556	2.1351	1.8449	1.7908	1.9397	1.8638	1.8855	1.825	2.0104	1.7419	1.874	1.7778	1.8019		36	2.0141	2.007	1.868	1.7046	1.4267	1.73	2.2263	1.4336	1.5114	2.0803	2.2225	1.7988	1.4054	1.6615	1.791	2.1117	1.3525	1.9957	1.2859	1.33
1.90568	0.128034	1.74847	0.273736		37	1.9351	2.0835	2.1977	1.8821	1.7382	1.9026	1.8452	1.7876	1.6749	1.9588	2.0217	1.8546	1.7753	2.074	1.9123	1.8934	1.8089	2.1052	1.8137	1.8995	1.8377	1.923		37	1.6537	2.2672	2.0585	1.7895	1.6208	1.7756	2.1424	1.3956	1.3708	1.7224	2.3224	1.6912	1.3807	1.711	1.7918	1.973	1.6526	1.8103	1.3522	1.5097
1.86836	0.102723	1.7161	0.277557		38	1.7856	1.8581	2.0491	1.8073	1.6843	1.8585	1.7644	1.8383	1.8257	2.0419	2.0653	1.9042	1.8674	1.9775	2.0048	1.816	1.8428	1.8898	1.7222	1.8614	1.8174	1.8219		38	1.4414	2.3621	1.9437	1.6201	1.5943	1.7739	1.5847	1.5039	1.569	1.9364	2.3877	1.9098	1.4433	1.732	1.6939	1.6827	1.5345	1.9198	1.3692	1.325
1.8954	0.130195	1.72242	0.342533		39	1.8438	1.8736	2.1621	1.7292	1.7732	1.9611	1.889	1.7495	1.9389	1.8046	2.0478	2.0753	1.7062	2.1382	1.9178	2.0149	1.7946	1.9028	1.7457	1.8503	1.9321	1.8481		39	1.5106	1.6681	1.9421	1.5034	1.6481	1.6805	1.5627	1.4972	1.1301	1.7064	2.5827	1.9819	1.4253	1.7531	2.2854	1.9483	1.8088	2.2585	1.2983	1.3484
1.9138	0.121866	1.66688	0.297893		40	1.9423	1.9239	2.116	1.7184	1.9457	2.1067	1.8071	1.8061	2.0474	1.9126	2.0651	1.9896	1.8796	1.9911	2.0053	1.9413	1.7712	1.945	1.7407	1.6926	1.9288	1.8272		40	1.6635	1.9098	2.0655	1.2875	1.4717	1.873	1.5141	1.3139	1.4526	1.7473	2.2094	1.727	1.549	1.7811	2.2027	1.7629	1.4728	2.0484	1.207	1.2763
1.88663	0.0899945	1.66031	0.243735		41	1.8505	1.8774	2.0194	1.8559	1.9955	1.9637	1.9741	1.8927	1.8625	1.7676	1.9065	1.9585	1.8231	2.1008	1.8455	1.8778	1.7965	1.8714	1.6968	1.9167	1.8344	1.8186		41	1.5261	1.7972	2.1725	1.3649	1.6549	1.6479	1.7729	1.499	1.5445	1.8084	1.9394	1.9872	1.6794	1.6425	1.833	2.0044	1.5066	1.7286	1.2275	1.3579
1.89604	0.0990726	1.65895	0.242453		42	2.0289	1.8705	1.9965	1.9317	2.0124	1.9541	2.0048	1.7483	1.9284	1.8278	1.8981	1.7881	1.7628	2.0313	1.929	1.9163	1.7822	2.0413	1.8208	1.8968	1.7622	1.7805		42	1.6818	1.5277	2.1575	1.6809	1.7954	1.7965	1.8898	1.373	1.49	1.6936	2.0871	1.6445	1.4134	1.6503	1.8729	1.9783	1.6156	1.6933	1.3234	1.4923
1.85826	0.123684	1.63475	0.246974		43	2.0145	1.6987	1.9095	1.7881	1.8866	2.0102	2.012	1.9217	1.5558	1.7966	1.9084	1.8023	1.878	2.0035	1.8742	2.0197	1.7808	1.9644	1.6774	1.8157	1.7758	1.7878		43	1.6335	1.9266	1.5549	1.5725	1.5896	2.0315	1.8998	1.4427	1.347	1.5066	2.2349	1.5482	1.7714	1.5899	1.6348	1.8303	1.6051	1.857	1.3059	1.4124
1.84399	0.10613	1.55461	0.190824		44	1.8813	1.8506	1.7684	1.8291	1.9896	1.8696	2.0023	1.7836	1.6706	1.7182	1.9926	1.7419	1.7746	2.0509	1.7492	1.8604	1.7956	1.6901	1.8282	1.9495	1.8509	1.9206		44	1.2637	1.7364	1.7037	1.5081	1.5994	1.7075	1.4919	1.4101	1.2187	1.5579	2.0733	1.5842	1.6289	1.8508	1.4926	1.5971	1.561	1.5914	1.3804	1.4152
1.84871	0.125845	1.55177	0.210061		45	1.882	1.8571	1.9457	1.9834	1.7826	1.9301	2.2553	1.7585	1.6717	1.6916	1.8608	1.8229	1.7452	1.9331	1.9211	1.9278	1.7612	1.7814	1.844	1.817	1.7358	1.7634		45	1.2579	1.7316	1.8491	1.3973	1.5151	1.4899	1.9384	1.4824	1.1642	1.6469	1.905	1.6888	1.3116	1.735	1.7101	1.637	1.5414	1.4941	1.331	1.4568
1.83376	0.0864486	1.52499	0.198021		46	1.8632	1.8105	1.8387	1.7007	1.8859	1.9488	1.9947	1.7584	1.7369	1.678	1.857	1.9178	1.7004	1.9216	1.8942	1.8552	1.9214	1.7501	1.8352	1.7866	1.8098	1.8777		46	1.5446	1.6186	1.7025	1.2744	1.5264	1.7235	1.4556	1.4445	1.3735	1.4865	2.118	1.67	1.4297	1.6782	1.5142	1.5766	1.7381	1.3725	1.2459	1.3345
1.91503	0.0867604	1.5927	0.209711		47	1.8973	1.8138	1.9583	1.9948	1.9634	1.9666	1.9135	1.841	1.8026	1.8171	2.0414	1.883	1.7589	1.9961	1.9783	1.9272	2.0353	1.8852	1.9305	1.8638	1.7976	2.0649		47	1.4644	1.6	1.6369	1.5201	1.438	1.7318	1.852	1.4312	1.6497	1.6064	2.3118	1.5836	1.3781	1.5794	1.7213	1.777	1.5858	1.5554	1.4403	1.4056
1.86928	0.102857	1.48645	0.23322		48	1.9027	1.9931	1.8927	1.7645	1.7415	2.0014	1.7938	1.7816	1.7019	1.8675	1.9724	1.8394	1.8597	1.8222	2.0133	1.8675	1.8664	1.864	1.7871	1.9215	1.7529	2.117		48	1.2855	1.6869	1.5468	1.3862	1.339	1.3697	1.4294	1.4632	1.1141	1.5314	2.2288	1.7662	1.5169	1.5086	1.5264	1.5953	1.7316	1.4431	1.2339	1.2138
1.8952	0.139942	1.51032	0.254085		49	2.1003	1.9575	2.0566	1.7234	1.6876	1.9636	1.8866	1.7831	1.9266	1.819	2.0451	1.8483	1.6143	1.8802	2.2076	1.9857	1.8445	1.8497	1.8449	1.891	1.776	2.0027		49	1.4737	1.6928	1.601	1.4217	1.3098	1.4856	1.7484	1.3066	1.4837	1.3322	2.2849	1.7577	1.2772	1.5357	1.7609	1.4848	1.7463	1.4291	1.1733	1.233
1.90287	0.132031	1.51035	0.233934		50	1.8122	2.0552	1.9261	1.814	1.9648	2.1354	1.902	1.8199	1.6875	1.9951	1.9961	1.8828	1.7392	1.95	2.136	1.9848	2.0857	1.7608	1.8355	1.7103	1.8728	1.7969		50	1.4866	1.43	1.4488	1.2654	1.8146	1.3684	1.6775	1.4634	1.3573	1.5646	2.2224	1.5179	1.4473	1.4822	1.8956	1.47	1.6758	1.4873	1.307	1.2357
1.89679	0.117844	1.42034	0.192524		51	1.9874	2.0214	1.879	1.9247	1.7203	2.1023	1.9803	1.8756	1.6845	1.9119	1.9382	1.9168	1.6466	1.9242	2.1171	1.8982	1.9391	1.9003	1.8468	1.8169	1.9244	1.7733		51	1.3719	1.6806	1.3097	1.2665	1.2539	1.3841	1.7069	1.3415	1.5075	1.5043	1.9235	1.6497	1.202	1.3737	1.5084	1.5986	1.2857	1.3682	1.3458	1.2066
1.90288	0.143281	1.43653	0.171145		52	1.8937	2.1376	1.9489	1.7545	1.9132	2.0405	1.7757	1.7884	1.7149	1.6742	1.9721	2.045	1.7684	1.8216	2.2575	1.8915	2.0278	1.9979	1.7841	1.8776	1.9053	1.8729		52	1.522	1.3466	1.5336	1.3188	1.3877	1.4978	1.5318	1.3291	1.6047	1.5677	1.9116	1.5815	1.3876	1.3514	1.662	1.3275	1.3622	1.3992	1.1208	1.3639
1.89444	0.0936637	1.40107	0.18217		53	1.8746	1.9562	1.878	1.8489	1.8931	1.9577	1.8195	1.9109	1.9465	1.7415	1.8019	2.0261	1.8161	1.9104	2.1743	1.9716	1.8996	1.75	1.8875	1.8338	1.8745	1.9049		53	1.5643	1.6828	1.4852	1.5233	1.2015	1.2502	1.6915	1.2455	1.4723	1.328	1.7423	1.5928	1.3763	1.4195	1.4472	1.5	1.322	1.2169	1.1498	1.1991
1.86161	0.107379	1.37851	0.182732		54	1.7658	1.8381	1.9177	1.7462	1.8727	1.8274	1.8494	1.849	1.8118	1.8798	2.0195	1.9953	1.6232	1.7917	2.1383	1.9396	1.9676	1.8446	1.8683	1.7637	1.8328	1.8129		54	1.2132	1.5463	1.4785	1.3473	1.2788	1.3589	1.5552	1.3518	1.3998	1.4345	1.9465	1.3412	1.1279	1.3362	1.6211	1.4992	1.2743	1.375	1.2212	1.1857
1.85635	0.132988	1.32466	0.170282		55	1.7146	1.9225	1.96	1.8632	1.8812	1.9148	2.0943	1.7533	1.6478	1.856	1.9208	2.0674	1.6494	1.9389	2.0106	1.8752	1.9949	1.899	1.6806	1.7257	1.7216	1.7479		55	1.3606	1.375	1.47	1.3068	1.1972	1.4682	1.5636	1.1195	1.481	1.4354	1.5107	1.3391	1.3156	1.4333	1.3794	1.4085	1.1825	1.5181	0.9358	1.1463
1.87992	0.11555	1.37327	0.186982		56	1.7926	1.9232	1.9353	1.8579	1.748	1.9124	1.94	1.8473	1.7347	1.83	1.9882	1.8829	1.7244	2.1619	2.1038	1.8776	1.9977	1.8966	1.7691	1.8792	1.8399	1.7155		56	1.4717	1.5063	1.3451	1.423	1.2392	1.4054	1.8658	1.2599	1.2314	1.5181	1.62	1.5661	1.1999	1.4564	1.3919	1.4063	1.1959	1.48	1.2095	1.1934
1.85928	0.104637	1.32184	0.169295		57	1.7352	2.0066	1.9091	1.7816	1.9613	1.8399	2.0191	1.8342	1.6512	1.8752	1.8641	1.8623	1.7906	2.0125	1.8915	1.864	1.8528	1.9442	1.7176	1.704	1.7918	1.9954		57	1.4117	1.5989	1.4339	1.2532	1.408	1.3254	1.4893	1.2066	1.0892	1.4271	1.7447	1.2951	1.1039	1.3815	1.3745	1.3556	1.3724	1.253	1.1907	1.0592
1.8305	0.0975336	1.33014	0.158848		58	1.7607	1.8597	1.9245	1.8258	1.7767	1.8431	1.9038	1.926	1.6119	1.774	1.9391	1.9245	1.6349	1.9048	1.92	1.8392	1.9457	1.7492	1.8484	1.7133	1.8939	1.7517		58	1.2543	1.506	1.3954	1.1741	1.344	1.3619	1.6138	1.2333	1.6725	1.2311	1.6416	1.3117	1.2604	1.4008	1.3594	1.3678	1.2406	1.1536	1.1928	1.1153
1.88395	0.120181	1.27864	0.203655		59	1.8199	1.8304	2.0203	1.9008	1.8417	1.9591	1.9348	1.9178	1.9627	1.8253	1.9883	1.9298	1.5331	1.8705	2.0986	1.931	1.9964	1.768	1.7235	1.7667	1.9626	1.8655		59	1.2216	1.2871	1.3329	1.0581	1.2321	1.4594	1.6944	1.4716	1.4832	1.159	1.6593	1.5307	0.8616	1.1673	1.3557	1.2253	1.1551	1.2805	1.1201	1.1329
1.89577	0.153617	1.25895	0.152087		60	1.9632	1.916	1.9436	2.0717	1.7398	1.9873	1.9466	1.7693	1.68	1.6959	1.8681	2.0454	1.5183	1.9115	2.1887	1.9762	2.1263	1.8741	1.8338	1.8415	1.8842	1.9255		60	1.2044	1.2566	1.3594	1.3219	1.1072	1.2269	1.4732	1.2166	1.2123	1.1919	1.7391	1.3025	1.0516	1.3132	1.2399	1.2631	1.3788	1.3476	1.0703	1.2192
1.88113	0.130308	1.24265	0.116883		61	1.7675	1.9566	1.9838	1.7772	1.9537	1.9542	2.0299	1.8126	1.7377	1.7682	2.0499	2.0045	1.6313	1.9804	1.9769	1.859	2.127	1.8221	1.7171	1.8991	1.8648	1.7114		61	1.2919	1.3749	1.3923	1.231	1.1093	1.2484	1.3967	1.1964	1.3374	1.1901	1.3836	1.4071	1.0761	1.3825	1.2419	1.1934	1.3064	1.0953	1.0909	1.1585
1.86615	0.127546	1.24215	0.138633		62	1.7486	1.9097	2.0585	1.9953	1.8354	1.7814	2.0613	1.8795	1.8915	1.7376	1.9571	1.8634	1.536	1.8434	2.011	1.9533	1.9686	1.9504	1.707	1.8186	1.7675	1.7802		62	1.1801	1.2426	1.2934	1.3074	1.1928	1.5346	1.4497	1.0975	1.0598	1.2285	1.4477	1.3405	1.2083	1.1352	1.1714	1.1328	1.3763	1.433	1.103	1.0318
1.80881	0.141839	1.24903	0.179111		63	1.7444	1.7758	1.8953	1.7556	1.7823	1.8844	1.7645	1.7341	1.5889	1.7181	1.9977	2.0126	1.617	1.8161	2.2137	1.8775	1.8475	1.758	1.6464	1.6671	1.8477	1.8491		63	1.1148	1.1409	1.383	1.332	1.1809	1.4555	1.689	1.0671	1.3165	1.0964	1.6464	1.3613	1.0031	1.2682	1.1933	1.2115	1.3232	1.222	1.0891	1.117
1.84512	0.135646	1.19301	0.159441		64	1.7649	1.7664	1.902	1.9833	1.8474	1.7663	1.9407	1.8093	1.6759	1.7917	1.9218	2.0753	1.4966	1.8455	2.0733	1.8031	2.0588	1.78	1.7093	1.8576	1.8686	1.8548		64	1.233	1.0422	1.2193	1.2838	1.1475	1.1619	1.3856	1.0959	1.2678	1.1919	1.6625	1.3521	0.9151	1.2027	1.2574	1.1411	1.283	1.256	1.0028	1.0053
1.82485	0.147097	1.16068	0.112721		65	1.5057	1.6963	1.891	1.9196	1.81	1.6815	2.0224	1.8536	2.1079	1.7985	1.73	1.799	1.6003	1.9351	1.987	1.957	1.954	1.7986	1.6128	1.7973	1.8185	1.8705		65	1.0512	1.15	1.1416	1.238	1.1281	0.9915	1.1535	1.2739	1.2175	1.3293	1.078	1.1564	1.0505	1.1143	1.1414	1.3231	1.4025	1.0897	0.9566	1.2497
1.82643	0.123299	1.14779	0.114167		66	1.6067	1.9117	1.8417	1.9881	1.8187	1.7033	1.7832	1.862	2.0136	1.7796	1.7597	1.7869	1.6305	1.9088	2.0285	1.9952	1.8988	1.9088	1.6436	1.7077	1.8183	1.786		66	1.0086	1.1184	1.0824	1.361	1.128	1.0458	1.1089	1.2352	1.1736	1.1024	1.3239	1.2358	0.9637	1.1401	1.0454	1.1502	1.4337	1.1932	1.0403	1.1303
1.81837	0.17784	1.15113	0.122755		67	1.4415	1.8072	1.8219	1.9315	1.7753	1.8874	2.0338	1.9168	2.0984	1.5509	1.7478	1.7787	1.589	1.79	1.8136	1.9605	2.1836	1.9195	1.5581	1.7565	1.8448	1.7973		67	0.9315	1.0165	1.0977	1.2144	1.2462	1.1892	1.2012	1.2815	1.1474	1.0871	1.3143	1.0983	0.904	1.1835	1.1544	1.243	1.3765	1.2587	1.0382	1.2524
1.82898	0.114858	1.1305	0.0959022		68	1.558	1.8342	1.9081	1.8829	1.8621	1.7698	1.8893	1.8604	1.9862	1.7685	1.8071	1.8038	1.6113	1.8629	2.038	1.9267	1.9332	1.9009	1.6564	1.7684	1.845	1.7643		68	1.1194	1.0767	1.05	1.216	1.0484	1.1462	1.1352	1.2282	1.1008	1.0856	1.3145	1.1178	1.0314	1.3261	0.9774	1.1846	1.217	1.2601	1.1036	1.0435
1.8463	0.162946	1.13829	0.10363		69	1.549	1.9137	1.9246	1.9613	1.8467	1.7414	1.9807	1.7756	2.2418	1.7195	1.7166	1.8302	1.6029	1.8748	1.9631	2.0633	1.8427	1.7295	1.5966	1.856	1.997	1.8916		69	1.1919	1.1382	1.0703	1.1535	1.129	1.2782	1.0557	1.0822	1.0976	1.145	1.3819	1.1388	1.0844	1.2992	1.0773	1.2123	1.2499	1.0994	0.941	1.192
1.81046	0.121854	1.14122	0.132592		70	1.6846	1.7641	1.9238	1.8624	1.8351	1.7049	1.9007	1.7855	2.0173	1.6292	1.8246	1.7717	1.5341	2.0057	1.8265	2.0394	1.7738	1.7201	1.7587	1.8035	1.8385	1.826		70	1.0671	1.0111	1.2991	1.2783	1.1004	1.0296	1.012	1.2282	1.1055	1.1896	1.4751	1.1925	1.0428	1.4066	1.1509	1.1897	1.1731	1.0168	0.9919	1.0506
1.84059	0.127081	1.12935	0.134212		71	1.6903	1.9582	1.8673	1.8178	1.9383	1.9138	1.8755	2.0048	1.9815	1.631	1.8788	1.871	1.6074	2.0537	1.7849	1.9704	1.7541	1.6914	1.6898	1.8552	1.9277	1.7301		71	1.1735	0.9739	1.1158	1.2	1.0251	1.0648	1.1066	1.2259	1.063	1.0531	1.5904	1.1772	1.0248	1.266	1.2521	1.0832	1.1733	1.0289	1.0304	1.1726
1.87613	0.120649	1.14301	0.183991		72	1.6575	1.8821	1.8193	1.8655	2.0746	2.0559	1.9371	1.9817	1.9083	1.72	1.9264	1.8303	1.637	2.0309	1.9012	1.9295	1.9068	1.7511	1.7107	1.9049	1.9684	1.8757		72	1.2472	1.0222	1.0176	1.2169	1.0937	1.0485	0.9865	1.0521	1.3545	1.172	1.84	1.1492	0.9834	1.1727	1.1268	1.2736	1.0974	1.0846	1.0517	1.1107
1.87792	0.140904	1.13553	0.179255		73	1.7195	1.8971	1.9258	1.9034	1.7497	1.9917	1.9361	1.78	2.0722	1.6658	2.0346	1.9007	1.946	2.0201	2.1165	1.81	1.8326	1.6519	1.6272	2.0172	1.9469	1.7692		73	1.1174	1.0608	1.0812	1.227	1.0764	1.0163	1.0701	1.13	1.03	1.078	1.863	1.0395	1.0577	1.1523	1.2485	1.2432	0.9576	1.1722	1.0123	1.1567
1.85225	0.132245	1.15818	0.251711		74	1.5788	1.8034	1.9872	1.8776	1.9764	1.934	2.0933	1.9352	1.9579	1.6374	1.9789	1.8225	1.9306	1.9542	1.9078	1.8806	1.7591	1.6388	1.735	1.8374	1.8113	1.7122		74	1.128	1.0751	1.0756	1.2911	0.9969	1.1089	1.2338	0.9555	1.2362	1.0199	2.1993	1.1169	1.068	1.1187	1.284	1.2081	1.1267	1.1053	0.9756	1.0246
1.8655	0.123162	1.12268	0.19857		75	1.7355	1.9265	1.8711	2.1527	1.8114	1.8304	2.0286	2.059	1.9322	1.7568	1.9367	1.8737	1.7874	1.9749	1.8141	1.961	1.8755	1.6618	1.754	1.6865	1.8427	1.7686		75	1.0075	1.222	1.0428	1.2909	0.9834	1.0077	1.1149	1.04	1.1133	1.1636	1.9014	1.0716	1.0774	1.057	1.3517	1.0437	0.9503	1.0542	1.0548	1.0449
1.84929	0.138647	1.14801	0.177847		76	1.7549	1.9086	1.8497	2.2734	1.832	1.8598	1.9159	1.8916	1.8879	1.5825	1.8696	1.7215	1.7292	2.0155	1.861	1.9717	1.7389	1.7875	1.665	1.8562	1.9195	1.7925		76	1.1192	1.1395	1.1075	1.4148	0.9901	1.1133	0.956	1.1129	1.1731	1.2092	1.7687	1.2362	1.0638	1.1513	1.2648	1.2109	1.1032	1.1069	0.96	1.1057
1.85583	0.131059	1.15952	0.209656		77	1.7487	1.7594	1.9593	1.9411	1.8221	1.8679	1.7892	2.0637	2.085	1.8091	1.9439	1.9266	1.7251	2.0861	1.6898	1.9399	1.8874	1.6678	1.6656	1.9043	1.8514	1.6949		77	1.2355	1.1223	1.1022	1.3172	1.0994	1.0567	1.124	1.1145	1.1671	1.1526	2.0003	1.311	1.1249	1.1438	1.0865	1.1723	1.0454	1.0646	0.9611	1.1223
1.86087	0.104824	1.14279	0.16586		78	1.7481	1.8559	1.803	1.822	1.8347	1.9206	1.907	1.9519	1.8323	1.8816	2.04	1.9968	1.7864	1.9888	2	1.9896	1.8246	1.6485	1.6755	1.8019	1.8285	1.8015		78	1.1572	1.1866	1.1002	1.1769	1.0983	1.0786	1.1669	1.1157	1.0923	1.1842	1.8212	1.2719	1.1051	1.1463	1.0539	1.0956	1.1472	1.0492	1.0799	1.0378
1.82986	0.0974902	1.12636	0.177549		79	1.9258	1.8472	1.8131	1.716	1.8212	1.9675	1.8958	1.9427	1.8576	1.6856	1.8983	1.8825	1.8172	1.8583	1.7651	1.9896	1.6624	1.6868	1.7445	1.7279	1.8032	1.9487		79	1.1597	1.3161	0.9043	1.3308	1.1233	1.0419	1.1791	1.1493	1.0777	0.989	1.732	1.2572	1.219	0.981	1.0243	1.0593	1.0497	1.1539	0.9403	0.9906
1.85658	0.116532	1.14704	0.193508		80	1.8594	1.7494	1.7304	1.8365	2.0064	1.9085	1.9264	1.8728	2.0032	1.7243	2.2031	1.831	1.7812	1.7769	1.9309	1.9392	1.913	1.7416	1.7914	1.7431	1.7841	1.7919		80	1.2974	1.2317	1.0087	1.2768	1.0777	0.9755	1.0865	1.0837	1.0971	1.1876	1.9402	1.1254	1.1101	1.098	1.0563	1.1228	1.0555	1.0626	1.0526	1.0848
1.83623	0.0861808	1.11748	0.150933		81	1.7602	1.8819	1.7937	1.7454	1.9061	1.9161	1.9169	1.9442	1.8662	1.8281	1.9837	1.9248	1.8023	1.9669	1.7818	1.9077	1.7531	1.7275	1.7494	1.7342	1.7797	1.7272		81	1.0743	1.1436	0.9945	1.2192	1.0956	1.0266	0.9865	1.1683	1.0214	1.1889	1.6768	1.1989	0.9945	1.2403	1.1562	1.1339	1.1235	1.0985	0.991	0.9836
1.87444	0.102458	1.15041	0.19217		82	1.9792	1.9331	1.8122	1.927	1.937	1.8675	1.8115	2.0373	1.7491	1.8723	2.021	1.9831	1.8879	1.9238	1.7218	2.0194	1.8335	1.7134	1.7009	1.8186	1.9003	1.7878		82	1.159	1.3403	0.9032	1.2411	1.1583	1.1368	1.0867	1.0831	1.1557	1.1841	1.906	1.1776	1.061	1.1747	1.1391	1.1053	1.1348	0.9836	1.0188	1.0438
1.85006	0.0908442	1.15795	0.160982		83	1.7123	2.0406	1.8699	1.9813	1.9138	1.7409	1.7721	1.8489	1.7622	1.8308	2.0432	1.8099	1.9234	1.8315	1.8179	1.8999	1.8054	1.8336	1.7427	1.7695	1.8915	1.8601		83	1.2948	1.5605	1.0267	1.2327	1.0724	1.0317	1.2242	1.2024	1.1043	1.2636	1.5887	1.2309	1.0191	1.0337	1.122	1.0176	1.1072	1.0316	1.11	1.1038
1.85403	0.108969	1.0997	0.174554		84	1.6869	1.9511	1.8108	1.9058	1.9038	1.8992	1.6562	1.9154	1.8118	1.8673	2.013	1.849	1.8918	1.9853	1.831	2.0666	1.7542	1.707	1.7311	1.8538	1.9528	1.7447		84	1.0994	1.0951	0.9589	1.1654	1.0496	1.0879	1.0624	1.1365	1.0954	1.1206	1.8138	1.2004	1.0571	1.1171	1.129	1.0692	1.054	1.0455	0.9607	0.9699
1.83948	0.0885098	1.11084	0.132007		85	1.7371	1.9236	1.8831	1.8964	1.817	1.7624	1.9405	1.951	1.7495	1.7044	1.9108	1.7871	1.7082	1.9266	1.8597	1.9284	1.7759	1.7165	1.8924	1.9781	1.8452	1.7747		85	1.2361	1.1796	0.9642	1.2269	1.081	1.0502	1.0123	0.9951	0.9168	1.3495	1.4963	1.0845	0.9958	1.1547	1.1337	1.0629	1.1911	1.0504	1.0409	1.0871
1.87624	0.10516	1.11919	0.131242		86	1.7729	1.8785	1.9085	2.0135	1.8376	2.025	1.9462	2.0098	1.8816	1.8694	1.9597	1.7846	1.9185	1.9697	1.7956	2.0406	1.8269	1.6085	1.8048	1.805	1.8477	1.7727		86	1.0385	1.2701	1.146	1.2347	1.1034	1.114	1.0722	1.0857	1.0181	1.1596	1.5873	1.1126	1.0088	1.1797	1.092	1.1435	1.0755	1.094	1.0709	1.1164
1.87549	0.101163	1.12111	0.156429		87	1.8072	2.0213	1.9269	1.8514	1.9526	1.8933	1.7854	1.976	1.918	1.9159	1.8824	1.8283	1.8599	1.9735	1.6155	2.0441	1.9342	1.7106	1.8627	1.8762	1.8869	1.7385		87	1.2555	1.1805	1.1571	1.1779	1.17	1.1342	1.1139	1.0324	0.9735	1.1727	1.6879	1.1194	1.0611	1.1841	1.0791	1.15	1.1333	1.0287	1.0315	1.0045
1.8697	0.0806721	1.12877	0.123169		88	1.9502	1.8249	1.8808	1.8134	1.8431	1.8556	1.8799	1.9638	1.7347	1.8806	1.8608	1.8128	1.8949	2.0746	1.7762	1.934	1.9976	1.7706	1.8352	1.7732	1.904	1.8725		88	1.2916	1.0972	1.0045	1.1803	1.217	1.0615	1.2006	1.1151	0.9885	1.1942	1.5278	1.0379	0.9898	1.1411	1.2156	1.152	1.069	1.0977	1.1374	1.0604
1.84417	0.124156	1.13301	0.149337		89	1.6885	1.9471	1.8778	1.8725	1.9966	1.7738	1.652	1.9308	1.9111	1.7139	1.9517	1.9313	1.8211	2.1308	1.9018	1.9257	1.6391	1.6872	1.8753	1.7695	1.8127	1.7615		89	1.2647	1.3263	1.0317	1.1199	0.9963	1.0014	1.1687	1.0636	0.9959	0.9897	1.6459	1.1854	1.0367	1.1381	1.2122	1.2505	1.0632	1.0687	1.056	1.1764
1.87972	0.11191	1.14621	0.180359		90	1.9151	1.9407	1.9305	1.8833	1.8653	2.0908	1.8857	1.9404	1.7763	1.8102	2.0376	1.7958	1.864	2.0702	1.8164	1.8216	1.7778	1.8106	2.0439	1.6311	1.8744	1.7721		90	1.3377	1.3708	1.0939	1.1863	1.0809	1.017	1.2796	1.1039	1.0444	1.1969	1.7623	1.206	1.0661	1.1336	1.1063	1.1569	1.1563	1.0791	0.9513	0.9869
1.82834	0.106781	1.10569	0.154822		91	1.737	2.0078	1.9315	1.8986	1.8331	1.8745	1.9373	1.9451	1.6727	1.7651	1.9734	1.6999	1.8994	1.872	1.6608	1.9243	1.7494	1.6854	1.838	1.7518	1.8501	1.7162		91	1.1777	1.1308	1.1778	1.2814	1.188	1.0656	1.1404	1.0097	1.0032	1.2128	1.6369	1.0802	0.9655	1.1622	1.1128	0.9936	1.1492	1.0276	0.9618	0.9541
1.80035	0.106238	1.12214	0.134541		92	1.8206	1.8394	1.77	1.9213	1.8667	1.7514	1.8798	1.9441	1.6714	1.6614	1.957	1.7241	1.6256	1.9598	1.6907	1.8706	1.8247	1.5982	1.8663	1.8022	1.7834	1.7791		92	1.252	1.1498	1.0755	1.263	1.1253	1.0851	1.0819	1.0013	0.896	1.1536	1.5747	1.1423	1.158	1.0804	1.2365	1.0513	1.0665	1.1247	0.9941	1.0651
1.83451	0.120754	1.07794	0.082821		93	1.6052	1.9979	1.8715	1.8419	1.8758	1.9733	1.7089	1.8645	1.7503	1.7071	1.954	1.6801	1.6823	1.9587	1.7856	1.867	2.0358	1.7243	1.8975	1.7602	1.9836	1.8338		93	1.1032	1.1615	1.0292	1.1588	1.0835	1.0285	1.0689	0.9702	1.0027	1.0326	1.3753	1.0992	0.9883	1.0817	1.058	1.0861	1.1036	1.0621	1.0913	1.0791
1.8539	0.080165	1.1158	0.132092		94	1.7644	1.9612	1.8587	1.9624	1.8482	1.8847	1.8214	1.8128	1.8797	1.8338	1.9864	1.913	1.8324	1.9875	1.7709	1.7581	1.8277	1.6799	1.8244	1.8924	1.9131	1.7727		94	1.1122	1.2066	1.051	1.2218	1.1712	1.0967	1.2054	1.1856	0.9683	1.0918	1.5683	1.206	1.0225	1.1429	1.0234	1.0696	1.1531	0.9591	0.9805	1.0572
1.82919	0.0742708	1.12346	0.125079		95	1.7013	1.7022	1.749	1.9153	1.9501	1.8903	1.8455	1.8005	1.7485	1.8478	1.8778	1.8022	1.8613	1.8373	1.8147	1.9101	1.8528	1.8352	1.7119	1.961	1.8082	1.8191		95	1.1546	1.1356	1.0168	1.0999	1.057	1.1408	1.3531	1.0927	1.0628	1.0728	1.5097	1.1295	1.1047	1.0514	1.1555	1.1138	1.305	0.9353	1.0052	1.0189
1.85728	0.113106	1.09775	0.12843		96	1.7716	1.8232	1.8404	1.8568	1.9144	1.9745	1.8981	2.0172	1.8279	1.8314	1.8235	1.7316	1.6282	2.0562	2.069	1.809	1.9169	1.8824	1.6434	1.8253	1.9187	1.8005		96	1.1227	1.3048	0.9881	1.1656	1.1184	0.9904	1.1546	0.959	0.9991	1.0975	1.4915	1.0976	1.0406	1.2552	1.0962	1.0959	1.1056	1.1306	0.9711	0.9331
1.85	0.13179	1.10667	0.136669		97	1.7383	1.9669	1.9001	1.7605	1.8333	2.1544	1.7834	2.0327	1.933	1.6815	1.7929	1.746	1.7764	2.0674	2.0178	1.8632	1.8982	1.6769	1.7599	1.8051	1.8147	1.6974		97	1.0962	1.1566	1.0355	1.0787	1.0361	1.0709	1.1634	1.0375	1.0515	1.1278	1.6009	1.0471	0.9109	1.1621	1.161	1.0922	1.2529	1.0175	0.9149	1.1368
1.83225	0.10517	1.07566	0.140957		98	1.7527	1.8013	2.0047	1.7771	1.7532	1.9519	1.6962	1.8936	1.7498	1.7649	1.9413	1.6143	1.9406	2.0249	1.7628	1.9067	1.8022	1.8808	1.7818	1.7764	1.9302	1.8022		98	1.0221	1.031	1.0075	1.2234	0.9951	1.0804	1.0492	0.988	1.0503	1.0449	1.565	1.0479	0.8846	0.9544	1.1548	0.9948	1.183	1.0494	1.0775	1.1481
1.8224	0.111561	1.09005	0.114371		99	1.7576	1.8555	1.9646	1.8566	1.8166	1.8814	1.6951	1.8842	1.7386	2.0077	1.9357	1.629	1.6909	2.0562	1.8549	1.7423	1.8365	1.721	1.8829	1.7306	1.8597	1.6953		99	1.2721	1.2303	1.0065	1.1368	1.1733	0.8903	1.0468	1.0121	0.9172	1.1462	1.381	1.1267	0.978	1.0856	1.0127	1.0847	1.164	1.024	1.0022	1.1127
1.82448	0.111944	1.11002	0.147503		100	1.7259	1.6867	1.9909	2.0026	1.9916	1.8091	1.7845	1.8507	1.7384	1.7514	1.9647	1.6576	1.693	1.8782	1.7826	1.9996	1.9249	1.7586	1.7291	1.8111	1.7438	1.8635		100	1.0556	1.3153	1.0407	1.2989	1.2059	1.0739	1.0413	1.035	0.9601	1.1874	1.5901	1.0476	0.8985	1.0182	1.1981	1.1261	1.1216	1.066	1.057	1.0002
1.83856	0.0960875	1.11171	0.144092		101	1.6859	1.8732	1.9561	1.8106	1.9241	1.9612	1.7355	1.9262	1.8562	1.7374	1.9512	1.8859	1.8264	1.9317	1.8756	1.9084	1.9326	1.7169	1.7322	1.6669	1.7488	1.8054		101	1.1538	1.1142	1.083	1.2386	1.2244	1.0761	1.0589	1.1094	1.1724	1.0177	1.6252	1.0236	0.9793	1.1833	1.0561	1.0452	1.2533	1.0379	0.9148	1.0465
1.83102	0.105002	1.08256	0.121798		102	1.7349	1.8472	1.8228	1.7422	1.8475	1.9013	1.788	1.9615	1.9578	1.7458	1.99	1.7379	1.8073	2.0443	1.9284	1.8153	1.857	1.7087	1.6691	1.6571	1.8189	1.8994		102	1.1957	1.1609	0.9697	1.1844	1.2078	1.0938	1.2235	0.9958	0.9321	1.0161	1.4457	1.0438	1.004	1.042	1.1522	1.0849	1.1258	0.9859	0.9838	0.9621
1.86929	0.109355	1.06925	0.114395		103	1.6865	1.796	1.8381	1.9484	1.9188	2.1044	1.9699	1.9304	2.0429	1.7625	1.7869	1.7576	1.8713	2.0132	1.7632	1.9247	1.9295	1.7773	1.7486	1.7707	1.904	1.8795		103	1.144	1.148	0.9762	1.1055	1.0556	0.9602	1.0826	0.9873	1.0963	1.0072	1.5093	0.9755	1.0166	1.0701	1.1238	1.0163	1.097	1.0311	0.9791	1.0998
1.81016	0.0881576	1.08315	0.122864		104	1.6694	1.8109	1.8218	1.8787	1.8858	1.8665	1.7853	1.9443	1.8015	1.6679	1.9161	1.6971	1.7919	1.9756	1.8014	1.8833	1.8953	1.6903	1.7874	1.7315	1.7749	1.7466		104	1.1786	1.1476	1.0698	1.1899	1.0236	1.0698	1.1966	0.9554	1.0671	1.0059	1.5021	1.0378	1.0077	1.0827	0.9423	1.1274	1.1881	1.0348	1.0269	0.9664
1.8126	0.0954571	1.07052	0.11383		105	1.7405	1.7305	1.8922	1.8347	1.9692	1.8157	1.7558	1.8426	1.7447	1.7715	1.8865	1.8275	2.0036	1.8759	1.596	1.8588	1.8872	1.7407	1.7428	1.6647	1.8828	1.8132		105	1.1632	1.1988	0.9666	1.0222	1.0714	1.0472	1.0512	1.0049	1.0934	1.0459	1.4854	1.0326	1.0966	1.0537	0.974	1.0759	1.1832	0.9809	1.0213	0.9575
1.75314	0.0591115	1.09899	0.111475		106	1.6702	1.7857	1.7918	1.6922	1.8294	1.671	1.8129	1.8447	1.7588	1.7619	1.7896	1.7795	1.7169	1.8686	1.7499	1.7116	1.7309	1.6915	1.7011	1.6866	1.8151	1.7092		106	1.0338	1.0923	1.1039	1.1345	0.9916	1.1047	1.0399	1.1206	1.1277	1.043	1.4848	1.1862	1.1008	1.1949	1.0906	1.23	1.0041	0.9866	1.0739	0.9869
1.75195	0.0719782	1.06507	0.0907876		107	1.5854	1.7839	1.7313	1.7107	1.7828	1.8883	1.8254	1.753	1.7811	1.8034	1.7814	1.6778	1.6734	1.8599	1.8148	1.6806	1.7119	1.6477	1.7894	1.7148	1.7656	1.7803		107	1.0573	1.0774	1.0453	1.0655	1.0559	1.0363	1.0545	1.0876	1.1086	1.025	1.3763	0.9905	0.975	1.2534	1.067	1.0071	1.042	0.9829	1.031	1.0141
1.75635	0.109977	1.04681	0.0816006		108	1.663	1.6614	1.6545	1.7162	1.6793	1.991	1.777	1.8895	1.5752	1.8017	1.8351	1.5819	1.7814	1.9689	1.8794	1.7847	1.8165	1.722	1.6997	1.7211	1.7206	1.7197		108	1.0949	1.1392	0.9854	0.9689	1.0071	1.0699	0.9934	1.0034	0.9938	1.1012	1.2807	1.0317	0.9874	1.2061	0.9904	1.014	1.138	1.0096	1.0225	0.9821
1.75297	0.0586302	1.09091	0.10673		109	1.7698	1.673	1.7989	1.6999	1.947	1.7476	1.8398	1.752	1.6997	1.7021	1.7608	1.7268	1.7774	1.7711	1.7876	1.7506	1.7594	1.7225	1.6998	1.6986	1.7401	1.7409		109	1.1229	1.1095	1.0258	1.0193	1.1567	1.0773	1.0775	0.9792	1.0244	1.1345	1.5	1.1587	1.08	1.0769	1.0893	1.0433	1.1802	0.9936	1.0132	1.0443
1.76342	0.0652131	1.06553	0.0993451		110	1.8541	1.7244	1.754	1.8025	1.853	1.7107	1.9288	1.7477	1.7097	1.7159	1.7911	1.7963	1.7963	1.7625	1.7929	1.6856	1.6825	1.6554	1.7132	1.8176	1.7341	1.767		110	1.1957	1.0346	1.0252	0.9885	1.0481	0.9723	0.9911	1.0485	0.9492	1.151	1.3662	1.0859	1.1777	1.1597	0.9697	1.0035	1.1412	0.9834	1.0863	1.0563
1.77201	0.0585829	1.07828	0.0741949		111	1.7502	1.7908	1.8287	1.9285	1.8299	1.7786	1.8383	1.7576	1.6331	1.7459	1.7644	1.8234	1.7633	1.7871	1.7648	1.7571	1.6889	1.7342	1.7346	1.7297	1.7589	1.7963		111	1.0543	1.0208	0.9862	1.0558	0.9626	1.0051	0.9945	1.1644	1.1557	1.1257	1.1811	1.0779	1.205	1.1063	1.06	1.1418	1.1215	1.1584	1.1311	1.04
1.78223	0.0823943	1.10501	0.0881964		112	1.7165	1.6571	1.7736	1.9408	1.8282	1.8622	1.7949	1.7379	1.7136	1.726	1.8004	1.7155	1.7921	1.8329	1.8152	1.7095	2.0155	1.7349	1.7286	1.7159	1.7823	1.8155		112	1.0683	1.0869	1.0361	1.0634	1.0243	0.9895	1.0138	1.1914	1.0306	1.3718	1.1865	1.1403	1.0879	1.0819	1.1163	1.1702	1.237	1.1549	1.1142	1.0428
1.78108	0.0797868	1.10938	0.0775709		113	1.6134	1.7211	1.8444	1.8923	1.7531	1.8068	1.8033	1.6867	1.6759	1.7606	1.933	1.744	1.8749	1.7921	1.7642	1.7738	1.917	1.7234	1.7896	1.7625	1.7155	1.8361		113	1.0369	1.1901	1.0792	1.03	1.0508	1.0367	1.0504	1.1143	1.1212	1.231	1.293	1.109	1.1285	1.0714	1.0475	1.1468	1.2356	1.1504	1.1237	1.1165
1.77028	0.0971896	1.12125	0.117596		114	1.5893	1.7207	1.9191	1.762	1.7241	1.8372	1.7363	1.7337	1.6229	1.6786	1.9854	1.833	1.8097	1.9261	1.778	1.8137	1.8274	1.68	1.7169	1.7473	1.8167	1.688		114	1.208	1.1223	1.0604	1.2195	1.0797	1.0322	0.9417	1.2116	0.9221	1.2448	1.4219	1.2644	1.163	1.1592	1.0944	1.1825	1.1062	1.1528	0.9668	1.0361
1.75987	0.0753016	1.12579	0.0787165		115	1.6646	1.6701	1.6946	1.8552	1.8022	1.8914	1.7171	1.8263	1.7123	1.7131	1.8396	1.7159	1.6876	1.8117	1.9298	1.8218	1.7233	1.7127	1.7701	1.6978	1.7128	1.7471		115	1.1272	1.1445	1.0207	1.0623	1.1078	1.0754	1.1266	1.0763	1.124	1.1465	1.3519	1.067	1.1205	1.2011	1.1646	1.1732	1.1103	1.2563	1.1835	1.0903
1.75423	0.0818118	1.12454	0.135962		116	1.745	1.6619	1.7426	1.7833	1.935	1.8375	1.6828	1.7519	1.6691	1.7595	1.9282	1.7491	1.6356	1.8306	1.8471	1.712	1.769	1.7614	1.7285	1.6849	1.7345	1.6436		116	0.9333	1.0898	1.0469	1.021	1.109	1.0373	1.0168	1.1623	1.102	1.2737	1.4418	1.1627	1.0575	1.3516	1.057	1.1547	1.3299	1.2917	1.0792	1.0809
1.74249	0.0711935	1.15824	0.132495		117	1.7104	1.6038	1.7506	1.7984	1.8509	1.8736	1.7412	1.7173	1.7014	1.8139	1.7916	1.7573	1.6927	1.8465	1.8302	1.7206	1.7137	1.7295	1.7012	1.6754	1.677	1.6375		117	1.0084	1.1631	1.0407	1.0933	1.1441	1.1695	1.007	1.4774	1.0306	1.2288	1.3246	1.2402	1.0122	1.3097	0.9977	1.3367	1.2421	1.2635	1.1798	1.1049
1.77747	0.071829	1.18696	0.115169		118	1.7727	1.7222	1.7592	1.8959	1.8861	1.6344	1.88	1.6645	1.8016	1.8487	1.8058	1.7389	1.7684	1.9042	1.7292	1.7856	1.7882	1.7383	1.7808	1.7089	1.7606	1.7302		118	0.9941	1.1788	1.083	1.076	1.1142	1.1441	1.1672	1.2256	1.1972	1.3026	1.2995	1.2358	1.1006	1.2795	1.0638	1.455	1.4045	1.2957	1.1513	1.1354
1.80896	0.0786916	1.17712	0.115325		119	1.7106	1.7386	1.7919	1.782	1.7792	1.9423	1.743	1.9179	1.7782	1.7473	1.9157	1.7085	1.7503	1.9237	1.8676	1.8444	1.8647	1.9086	1.8626	1.7183	1.7744	1.7274		119	1.0623	1.169	1.0566	1.0905	1.1045	1.1298	0.9636	1.3985	1.1961	1.225	1.3161	1.2401	1.3154	1.2231	1.2775	1.267	1.2915	1.2959	1.0723	1.1012
1.79284	0.0784671	1.17762	0.147012		120	1.7653	1.6138	1.7674	1.8086	1.712	1.8434	1.7839	1.944	1.7263	1.7802	1.8803	1.8199	1.7851	1.7395	1.9034	1.7748	1.8976	1.777	1.7988	1.6549	1.8048	1.8615		120	1.035	1.2081	1.0684	1.1631	1.0189	1.061	1.1512	1.4766	1.0056	1.4307	1.3981	1.2034	1.0706	1.2456	1.0961	1.3034	1.4241	1.1431	1.1935	0.9796
1.77784	0.0878867	1.20337	0.1418		121	1.7807	1.6623	1.7716	1.8179	1.7862	1.9646	1.8422	1.8361	1.7361	1.6453	1.888	1.7555	1.6441	1.8285	1.7399	1.7368	1.9227	1.6825	1.78	1.6544	1.8017	1.8354		121	1.1148	1.0737	1.0937	1.1831	0.9544	1.1623	1.0002	1.4517	1.1252	1.3054	1.3562	1.184	1.1316	1.2564	1.358	1.3711	1.5283	1.178	1.2119	1.114
1.79503	0.0893641	1.20499	0.187262		122	1.8313	1.6811	1.8016	1.8257	1.8262	1.8523	1.9414	1.7763	1.7995	1.7898	2.0052	1.7888	1.6705	1.8642	1.6595	1.7698	1.8699	1.8762	1.7732	1.7162	1.6956	1.6764		122	1.092	1.1084	1.0693	1.0543	1.0624	1.1512	1.1355	1.556	1.0739	1.3803	1.5092	1.2534	1.0243	1.2572	1.1026	1.3404	1.6839	1.3178	1.1609	1.123
1.7727	0.0765857	1.21229	0.128092		123	1.7894	1.7241	1.7888	1.7879	1.766	1.7932	1.8273	1.7208	1.6631	1.8408	1.9725	1.7827	1.7094	1.8281	1.7519	1.7343	1.8366	1.844	1.7552	1.8107	1.6441	1.6285		123	1.1403	1.2173	1.2458	1.1588	1.0563	1.1445	1.1702	1.4841	1.3559	1.1442	1.4641	1.2324	1.1797	1.2661	1.1101	1.2671	1.4224	1.2498	1.1932	1.1095
1.78	0.0883544	1.22563	0.1599		124	1.6887	1.7083	1.8229	1.7659	1.7252	1.8166	1.8676	1.8518	1.6512	1.7903	1.9697	1.7668	1.6421	1.86	1.7872	1.7194	1.9082	1.8742	1.8421	1.6867	1.7288	1.6864		124	1.1652	1.1932	1.3144	1.1539	1.1189	1.2259	1.0191	1.3764	1.0135	1.1667	1.4814	1.3455	1.3502	1.3078	1.0517	1.2816	1.6762	1.2393	1.208	1.0793
1.76409	0.0681676	1.22943	0.165634		125	1.6333	1.6752	1.758	1.8761	1.7805	1.8231	1.821	1.7905	1.6791	1.762	1.9139	1.805	1.778	1.8139	1.7488	1.6818	1.815	1.7357	1.7349	1.6903	1.7692	1.7246		125	1.0876	1.1117	1.1583	1.1356	1.001	1.4372	1.4331	1.3545	0.9539	1.2491	1.4159	1.2507	1.2437	1.3314	1.1913	1.3852	1.5174	1.4547	1.1184	1.0693
1.77026	0.0587219	1.23894	0.120221		126	1.7267	1.8186	1.7724	1.8027	1.7154	1.6616	1.7797	1.8727	1.6569	1.7668	1.8502	1.7018	1.7863	1.799	1.8207	1.7607	1.8108	1.7595	1.8257	1.6828	1.7651	1.8097		126	1.1668	1.215	1.3275	1.0935	1.0531	1.3035	1.2684	1.22	1.198	1.2352	1.4743	1.1836	1.3579	1.249	1.3602	1.4183	1.3226	1.2942	1.2865	1.1558
1.78002	0.0878551	1.2873	0.189742		127	1.7387	1.834	1.6752	1.8646	1.7934	1.7638	1.7021	1.9694	1.7222	1.7365	1.8049	1.6786	1.9093	1.7781	1.8822	1.791	1.8535	1.8916	1.6611	1.6654	1.7522	1.6927		127	1.2992	1.2256	1.1266	1.4438	1.2457	1.2729	1.1984	1.3189	0.908	1.4253	1.3326	1.0868	1.4519	1.583	1.4589	1.4669	1.6328	1.4066	1.2794	1.1356
1.76921	0.0679537	1.28106	0.162796		128	1.7462	1.8177	1.6993	1.8011	1.6967	1.8514	1.7894	1.8965	1.6555	1.7278	1.762	1.7152	1.7399	1.7747	1.8348	1.8352	1.908	1.7546	1.7296	1.6935	1.7948	1.6987		128	1.2595	1.0558	1.2453	1.2166	1.1821	1.2509	1.1819	1.4055	1.1275	1.3957	1.3592	1.2221	1.2302	1.5599	1.4292	1.6329	1.3513	1.364	1.4765	1.0621
1.79184	0.0799508	1.2929	0.143091		129	1.826	1.7999	1.6795	1.8494	1.7275	1.7762	1.813	1.834	1.6639	1.8075	1.9291	1.7138	1.8223	1.7148	1.9036	1.6937	1.8531	1.8205	1.7848	1.7104	1.7434	1.9541		129	1.1792	1.3858	1.2073	1.2743	1.2369	1.2645	1.1756	1.3201	1.1152	1.2862	1.3732	1.3328	1.178	1.4094	1.5753	1.4929	1.6245	1.3627	1.2223	1.0685
1.76623	0.104557	1.30117	0.15417		130	1.7603	1.7647	1.7557	1.7506	1.6581	1.894	1.7048	1.6896	1.622	1.7138	1.8553	1.7337	1.7764	1.7928	2.0699	1.6599	1.7478	1.7892	1.9404	1.644	1.7018	1.8322		130	1.1711	1.2278	1.2582	1.311	1.1602	1.5014	1.2346	1.5165	1.2395	1.2359	1.4972	1.2231	1.2878	1.4426	1.4029	1.2562	1.6262	1.4666	1.3116	1.0928
1.76385	0.0773223	1.28729	0.150959		131	1.7445	1.7443	1.6851	1.782	1.7091	1.8669	1.7096	1.8403	1.7298	1.768	1.8749	1.7024	1.7049	1.818	1.9918	1.7664	1.7808	1.763	1.7357	1.6395	1.7088	1.7388		131	1.1911	1.3156	1.158	1.3689	1.0941	1.5148	1.1615	1.4362	1.1984	1.3189	1.4391	1.4819	1.1642	1.31	1.5128	1.2361	1.4234	1.4525	1.2839	1.0679
1.76835	0.10091	1.28724	0.143266		132	1.766	1.748	1.6112	1.9604	1.6809	1.8354	1.6595	1.7968	1.6456	1.8012	1.951	1.7719	1.7576	1.7008	2.0167	1.7597	1.7523	1.8057	1.7044	1.728	1.726	1.7245		132	1.1541	1.1083	1.3394	1.3449	1.1318	1.4412	1.1308	1.3604	1.2805	1.452	1.5352	1.2584	1.229	1.1176	1.4799	1.2758	1.3636	1.5515	1.3186	1.1874
1.78762	0.0953747	1.35976	0.183351		133	1.6411	1.7443	1.8	1.8978	1.8114	1.859	1.7842	1.843	1.6323	1.8204	1.9707	1.768	1.7495	1.8176	2.0053	1.7754	1.684	1.8164	1.7849	1.6485	1.7652	1.7087		133	1.2574	1.3169	1.3893	1.3394	1.1862	1.3307	1.4067	1.621	1.0121	1.404	1.6295	1.332	1.6221	1.2887	1.5577	1.3944	1.41	1.5165	1.5616	0.9727
1.78613	0.115262	1.2912	0.195367		134	1.7515	1.5966	1.734	1.8557	1.6607	1.7692	1.7404	1.884	1.6202	1.9053	2.0392	1.7578	1.6995	1.8245	2.0563	1.7866	1.7725	1.8101	1.8425	1.6804	1.7329	1.775		134	1.1894	1.2144	1.1857	1.3039	1.1511	1.4153	1.0507	1.6871	1.0676	1.3341	1.5034	1.3182	1.1887	1.3441	1.7414	1.3338	1.5104	1.3044	1.3552	1.1412
1.80375	0.0922962	1.30589	0.208944		135	1.7129	1.7381	1.7216	1.8516	1.7842	1.8129	1.7553	1.8284	1.6433	1.8556	1.9382	1.8373	1.8269	1.8099	2.0026	1.7285	1.9704	1.892	1.8069	1.6949	1.6924	1.7785		135	1.1177	1.1598	1.1807	1.1676	1.1042	1.2377	1.1754	1.3663	0.99	1.4408	1.5516	1.492	1.5032	1.3995	1.6575	1.3321	1.6733	1.5893	1.349	1.108
1.79644	0.0978392	1.33889	0.212737		136	1.7413	1.6126	1.7815	1.8349	1.8172	1.8191	1.9219	1.808	1.7184	1.7675	2.0249	1.8099	1.6932	1.9405	1.9182	1.8657	1.8296	1.7916	1.7314	1.6791	1.7221	1.6931		136	1.2536	1.2615	1.3343	1.2953	1.2773	1.2919	1.3318	1.334	1.0456	1.3085	1.4267	1.3058	1.5998	1.5635	1.9283	1.4496	1.4981	1.5629	1.2199	0.9366
1.82974	0.104332	1.34966	0.177176		137	1.7726	1.8722	1.672	1.9426	1.8349	1.9138	1.9715	1.8274	1.7546	1.8382	1.9897	1.8165	1.8178	1.9566	2.0564	1.7802	1.781	1.7539	1.6735	1.7272	1.7221	1.7795		137	1.2281	1.3668	1.2727	1.3385	1.1206	1.5776	1.4691	1.2011	1.0995	1.412	1.5817	1.1979	1.4698	1.3924	1.8304	1.36	1.4609	1.3635	1.3629	1.0755
1.8411	0.103985	1.30803	0.154486		138	1.8189	1.8119	1.7282	1.9153	1.8076	1.8114	1.8629	1.8994	1.6998	1.8499	1.981	1.8075	1.8462	1.8681	2.202	1.7844	1.8563	1.8094	1.8252	1.8586	1.7208	1.7393		138	1.1312	1.3978	1.0809	1.2539	1.3773	1.3479	1.1681	1.2964	1.3188	1.3819	1.5066	1.3316	1.2607	1.2687	1.6642	1.5289	1.4967	1.3565	1.1532	1.0525
1.80707	0.0833645	1.31356	0.110095		139	1.8866	1.7954	1.7239	1.7786	1.8188	1.8128	1.9527	1.7222	1.6442	1.8338	1.8705	1.7217	1.7948	1.8889	2.0029	1.7322	1.7094	1.8003	1.7967	1.8542	1.8383	1.7766		139	1.3143	1.2733	1.2466	1.3505	1.2567	1.2217	1.2784	1.3257	1.0926	1.4298	1.517	1.2616	1.2593	1.4858	1.471	1.4553	1.3378	1.4349	1.2276	1.2022
1.85145	0.102747	1.28088	0.17879		140	1.802	1.8689	1.7671	1.886	1.802	1.7881	1.9419	1.8656	1.7646	1.8478	1.8718	1.7866	1.6812	1.857	2.2112	1.7346	1.8681	1.9243	1.8265	1.8561	1.8564	1.9241		140	1.2542	1.0121	1.2004	1.2671	1.3585	1.3539	1.3622	1.5079	0.9138	1.5955	1.4384	1.1751	1.1675	1.4273	1.6683	1.3095	1.2208	1.2205	1.1666	1.1048
1.81985	0.109759	1.27514	0.187953		141	1.7702	1.6897	1.7884	1.7822	1.8228	1.7206	2.0104	1.8795	1.6157	1.8775	1.8541	1.7732	1.6571	1.9461	2.0875	1.7636	1.9317	1.8221	1.7876	1.7842	1.8204	1.8522		141	1.2213	1.1004	1.1007	1.2279	1.3675	1.4843	1.3758	1.1693	0.9341	1.7001	1.4517	1.2142	0.988	1.4511	1.4706	1.4101	1.2673	1.3537	1.3307	1.2962
1.81381	0.0831486	1.30815	0.168381		142	1.8179	1.8647	1.8076	1.7808	1.8336	1.763	1.8475	1.7926	1.7121	1.7823	1.8274	1.7156	1.7909	1.9631	2.063	1.7584	1.8494	1.7077	1.7989	1.8862	1.8254	1.7157		142	1.3049	1.5046	1.1178	1.3876	1.2876	1.469	1.431	1.1432	0.9903	1.4364	1.3462	1.3111	1.0209	1.6619	1.5696	1.1728	1.3647	1.3081	1.2347	1.3077
1.84301	0.0799299	1.31755	0.166996		143	1.768	1.7783	1.8017	1.8275	1.8609	1.8886	1.8673	1.9087	1.7467	1.854	1.916	1.8338	1.7363	1.9002	2.0667	1.7703	1.7584	1.8318	1.8574	1.8573	1.9634	1.7529		143	1.2275	1.3831	1.2182	1.2132	1.2785	1.4468	1.3914	1.1554	1.0559	1.3473	1.6418	1.5384	1.2462	1.3576	1.6741	1.3025	1.3816	1.4677	1.147	1.2065
1.83809	0.0933458	1.36162	0.198623		144	1.8789	1.832	1.8034	1.8493	1.9771	1.8656	1.8313	1.7397	1.6579	1.965	1.9587	1.7784	1.8406	1.8775	2.0043	1.7432	1.6905	1.7366	1.7838	1.8398	1.939	1.8454		144	1.3693	1.3751	1.1392	1.4078	1.2118	1.41	1.4905	1.2359	1.0424	1.4565	1.4887	1.3005	1.5632	1.592	1.9439	1.3304	1.3159	1.4206	1.3282	1.0713
1.82792	0.11632	1.31035	0.176153		145	1.9115	1.7522	1.8792	1.8356	1.778	1.7422	1.8553	1.7719	1.5843	1.8718	2.0874	1.8514	1.7695	1.8475	2.1324	1.7632	1.7298	1.7929	1.7534	1.8528	1.8897	1.7623		145	1.3257	1.3812	1.0959	1.501	1.128	1.5575	1.2866	1.196	1.094	1.3456	1.4204	1.5131	1.2017	1.3521	1.7251	1.2616	1.2464	1.5626	1.1492	1.096
1.85457	0.117196	1.27946	0.173643		146	1.884	1.8219	1.8007	1.8837	1.9543	1.8654	1.9601	1.757	1.6615	1.7888	2.0794	1.7968	1.7447	1.9709	2.1195	1.7736	1.7245	1.7711	1.8036	1.9291	1.9602	1.7497		146	1.265	1.2649	1.0171	1.2964	1.2078	1.5286	1.4565	1.0101	1.1383	1.3386	1.4177	1.3822	1.0999	1.3987	1.706	1.3278	1.1557	1.4227	1.2623	1.1835
1.8385	0.118039	1.33415	0.180733		147	1.9733	1.8363	1.9105	1.8869	1.7374	1.7581	1.8561	1.7699	1.7926	1.8689	1.9603	1.735	1.7945	2.069	2.1092	1.7673	1.6829	1.695	1.7477	1.9068	1.8986	1.6906		147	1.303	1.4029	1.1922	1.5672	1.2536	1.3288	1.6207	1.2945	1.0707	1.4895	1.3953	1.2504	1.0991	1.6581	1.6681	1.3792	1.2206	1.4174	1.2654	1.1403
1.85039	0.0909525	1.35276	0.209072		148	1.9554	1.8034	1.9217	1.8038	1.76	1.8214	1.9105	1.7537	1.681	1.8237	2.0724	1.8819	1.743	1.8395	1.9917	1.7937	1.8085	1.937	1.8015	1.9202	1.8487	1.8358		148	1.4641	1.5654	1.1126	1.4726	1.3016	1.3632	1.2865	1.2077	1.0226	1.7659	1.5023	1.2036	1.2138	1.6101	1.5446	1.3035	1.358	1.7382	1.2164	1.3374
1.8585	0.0890967	1.31878	0.245638		149	1.7535	1.6947	1.9328	1.8438	2.0645	1.8909	1.8314	1.7892	1.7664	1.8959	1.9738	1.8912	1.8216	1.8773	2.0216	1.8332	1.7999	1.8295	1.8478	1.882	1.905	1.7411		149	1.3624	1.245	1.3661	1.145	1.354	1.3401	1.1237	1.0716	0.9294	1.3901	1.7468	1.4508	1.1826	1.8852	1.617	1.4826	1.2754	1.6126	1.1775	1.1761
1.81467	0.0872673	1.29566	0.176798		150	1.8098	1.6977	1.7693	1.8536	1.9602	1.7637	1.8584	1.7787	1.747	1.8534	1.9955	1.7747	1.7061	1.8064	1.9471	1.6682	1.7471	1.7601	1.8018	1.8975	1.914	1.8125		150	1.2604	1.3128	1.0681	1.3052	1.4117	1.3363	1.22	1.1142	1.0469	1.4117	1.654	1.4685	1.1501	1.3937	1.5497	1.2728	1.4471	1.5214	1.222	1.2358
1.83048	0.0965739	1.27543	0.178727		151	1.8031	1.8074	1.854	1.7746	1.9233	1.8074	1.923	1.8337	1.7287	1.895	2.015	1.7819	1.6907	1.8179	2.0786	1.7231	1.8691	1.7843	1.7882	1.731	1.9038	1.7368		151	1.3346	1.3769	1.1323	1.2497	1.3594	1.2225	1.4159	1.2103	0.9423	1.3919	1.39	1.3509	1.1208	1.2523	1.7564	1.3626	1.4452	1.3774	1.1758	1.0849
1.81988	0.0706398	1.29462	0.174096		152	1.8711	1.7661	1.8093	1.8276	1.9202	1.8142	1.7465	1.8342	1.685	1.8829	1.9311	1.8785	1.6879	1.7801	1.8962	1.856	1.767	1.7284	1.8522	1.8308	1.8929	1.7792		152	1.5001	1.2223	1.2249	1.2847	1.3122	1.2959	1.2468	1.1452	0.9054	1.6245	1.5517	1.3921	1.1719	1.3461	1.6232	1.2779	1.1819	1.4597	1.2281	1.1452
1.83438	0.102007	1.34373	0.212215		153	1.7736	1.9029	1.8564	1.8238	1.9023	1.7893	1.7442	1.8089	1.6895	1.8417	2.0523	1.862	1.7156	1.8973	2.0811	1.7665	1.7844	1.7451	1.758	1.8669	1.9558	1.7387		153	1.3128	1.6739	1.2054	1.5788	1.3901	1.3605	1.5235	1.1016	0.9642	1.3261	1.6151	1.3132	1.0573	1.5557	1.7441	1.3524	1.4378	1.2567	1.3671	1.2264
1.83025	0.0861281	1.3326	0.181293		154	1.7342	1.8175	1.9402	1.8543	1.8793	1.7935	1.7612	1.8367	1.6759	1.9062	1.9268	1.7307	1.7801	1.8535	1.9472	1.8498	1.7943	1.7578	1.7404	1.8754	2.0304	1.7802		154	1.2561	1.644	1.3178	1.2733	1.4305	1.4421	1.3466	1.2154	0.9814	1.4854	1.5691	1.2943	1.2486	1.47	1.7329	1.4708	1.135	1.2336	1.2756	1.1991
1.84523	0.0973076	1.36571	0.240222		155	1.819	1.7968	1.9465	2.0773	1.9163	1.8231	1.796	1.83	1.6571	1.9189	1.91	1.8417	1.7556	2.0023	1.9251	1.8272	1.6748	1.76	1.7972	1.8536	1.84	1.8265		155	1.4073	1.498	1.233	1.4721	1.3528	1.3167	1.4749	1.2913	0.8444	1.7848	1.5965	1.4263	1.2517	1.7548	1.6871	1.4886	1.1683	1.5619	1.1712	1.169
1.85449	0.0842065	1.32003	0.178741		156	1.752	1.8278	1.8485	1.9806	1.8762	2.0015	1.9374	1.8006	1.6901	1.8367	1.9543	1.9107	1.8547	1.925	1.8839	1.765	1.7411	1.8446	1.7391	1.9315	1.8894	1.808		156	1.271	1.5193	1.4019	1.4618	1.4614	1.3609	1.4746	1.1712	1.0661	1.5087	1.5022	1.3683	1.1166	1.5383	1.5283	1.2661	0.9976	1.3759	1.1508	1.3364
[truncated: 2 more columns]
