# Supplementary material for: Hypoxia controls plasma membrane targeting of polarity proteins by dynamic turnover of PI4P and PI(4,5)P2
Source: eLife. 2022 Jun 9;11:e79582. doi: 10.7554/eLife.79582 (PMC9242647; doi:10.7554/eLife.79582)
Supplement: Figure 6—source data 1. [file elife-79582-fig6-data1.xlsx]

## Sheet: Figure 6A-P4MX2
Figure 6 Souce Data 1
						1	2	3	4	5	6	7	8	9	10			1	2	3	4	5	6	7	8	9	10
WT		RNAi			WT												RNAi
AVG	STDEV	AVG	STDEV
C2_PM/Cy	C2_PM/Cy	C2_PM/Cy	C2_PM/Cy		min	C2_PM/Cy	C2_PM/Cy	C2_PM/Cy	C2_PM/Cy	C2_PM/Cy	C2_PM/Cy	C2_PM/Cy	C2_PM/Cy	C2_PM/Cy	C2_PM/Cy		min	C2_PM/Cy	C2_PM/Cy	C2_PM/Cy	C2_PM/Cy	C2_PM/Cy	C2_PM/Cy	C2_PM/Cy	C2_PM/Cy	C2_PM/Cy	C2_PM/Cy
4.88593	0.416827	4.5851	0.226224		1	4.3457	4.7163	5.7099	4.6461	4.8429	4.846	4.7386	5.2131	5.3328	4.4679		1	4.6097	4.3542	4.3333	4.8699	4.9071	4.7753	4.5118	4.3232	4.7387	4.4278
3.10496	0.306469	2.69151	0.24124		2	2.8437	2.9767	3.8587	2.7563	3.1133	3.1805	2.9546	3.1704	3.2358	2.9596		2	2.7924	2.2572	2.5289	2.8912	3.0031	3.0155	2.7408	2.5277	2.5469	2.6114
3.24752	0.278161	2.74185	0.173114		3	3.1924	2.8426	3.3276	2.8955	3.4816	3.8057	3.1899	3.2991	3.3327	3.1081		3	2.6437	2.4928	2.5717	2.7941	2.9739	2.6023	3.0175	2.8079	2.8355	2.6791
3.07277	0.21365	2.75101	0.157327		4	2.9016	2.7568	3.0798	2.854	3.0329	3.2836	3.2514	3.3061	3.3483	2.9132		4	2.8186	2.3682	2.7689	2.7556	2.8402	2.7912	2.8512	2.7916	2.9201	2.6045
3.06149	0.18764	2.80062	0.19666		5	3.0453	2.9148	3.1334	2.8985	3.1467	3.4099	2.9915	3.2251	3.1061	2.7436		5	2.8263	2.2732	2.9706	2.9308	2.8408	2.9174	2.771	2.8747	2.7708	2.8306
3.12521	0.248842	2.83678	0.239398		6	2.9044	2.8909	3.6387	2.8622	3.1078	3.3565	3.3443	3.0813	3.0386	3.0274		6	2.9453	2.2875	2.8246	2.7237	2.8505	2.88	3.111	3.1545	2.7331	2.8576
3.20008	0.182732	2.94217	0.291089		7	3.1304	3.065	3.4039	2.9186	3.5212	3.2448	3.1699	3.1673	3.0328	3.3469		7	3.2348	2.2905	2.9109	2.8806	2.936	2.844	3.0655	3.3845	2.8214	3.0535
3.24621	0.211621	2.90792	0.300608		8	3.127	2.995	3.71	3.1334	3.4467	3.3203	3.2099	3.2281	3.2692	3.0225		8	2.9	2.1269	3.0892	2.8361	2.9356	3.0153	3.2733	2.9323	3.0438	2.9267
3.23133	0.390797	2.93098	0.292035		9	3.035	2.9946	3.6424	3.0924	3.2488	3.4223	3.0097	2.9267	4.1025	2.8389		9	3.1238	2.1899	2.984	2.8289	2.8916	3.0863	3.2438	3.1123	3.0003	2.8489
3.20456	0.234898	2.85187	0.233185		10	3.042	2.9199	3.3842	2.9627	3.165	3.6051	3.4046	3.439	3.0772	3.0459		10	2.8847	2.2857	2.74	2.8344	2.9031	2.8968	3.1734	2.8738	3.0672	2.8596
3.18458	0.140105	2.85282	0.245972		11	3.153	3.1958	3.2861	2.8722	3.0839	3.1926	3.3442	3.2457	3.3432	3.1291		11	2.8965	2.2499	2.8568	2.771	2.9954	2.9344	3.0478	2.9235	3.1404	2.7125
3.37682	0.1719	2.83448	0.254217		12	3.197	3.411	3.4033	3.1067	3.4494	3.4741	3.4334	3.6485	3.4972	3.1476		12	2.6873	2.2794	2.7298	2.7175	3.2166	2.9909	2.8787	2.8516	3.028	2.965
3.26257	0.313954	2.76146	0.19875		13	3.1036	3.0437	3.6226	2.9402	3.3004	3.5899	3.3843	3.6799	3.2293	2.7318		13	2.7538	2.2946	2.756	2.6349	3.0053	2.7442	2.8649	2.7834	2.9839	2.7936
3.322	0.323771	2.7471	0.227513		14	2.9374	3.3012	3.4259	2.9211	3.5919	3.5197	3.5495	3.6426	3.5578	2.7729		14	2.7656	2.3962	2.572	2.6331	3.2326	2.8438	2.8131	2.8065	2.8491	2.559
3.28285	0.237875	2.70508	0.185407		15	3.1721	3.182	3.3111	2.783	3.4678	3.4135	3.25	3.6561	3.445	3.1479		15	2.8672	2.4656	2.6145	2.5425	3.1163	2.659	2.6923	2.5836	2.7541	2.7557
3.23956	0.351429	2.6215	0.0968203		16	2.7788	2.8703	3.157	2.8523	3.6759	3.5526	3.5366	3.4862	3.5333	2.9526		16	2.5227	2.4655	2.5336	2.5704	2.7511	2.6568	2.6369	2.652	2.7576	2.6684
3.27183	0.26998	2.45124	0.11985		17	3.1443	2.7945	3.3502	2.8709	3.4076	3.5786	3.5531	3.4675	3.3625	3.1891		17	2.4608	2.2297	2.2797	2.4342	2.4903	2.4815	2.5072	2.4823	2.6571	2.4896
3.15511	0.238836	2.46856	0.141493		18	3.0421	2.8528	3.1284	2.8545	3.1224	3.1832	3.1229	3.653	3.4136	3.1782		18	2.4499	2.3241	2.3074	2.6071	2.6013	2.357	2.4749	2.3467	2.7303	2.4869
3.26419	0.247868	2.40414	0.145949		19	3.2646	3.0545	3.5115	2.851	2.9955	3.3148	3.4506	3.5993	3.4624	3.1377		19	2.2575	2.2683	2.199	2.6052	2.5075	2.4306	2.4185	2.284	2.6016	2.4692
3.05574	0.231492	2.35994	0.161357		20	3.0974	2.845	3.4078	2.7571	2.9059	3.3909	2.88	3.1699	3.2005	2.9029		20	2.4329	2.2315	2.0438	2.4017	2.5943	2.315	2.3649	2.2303	2.5233	2.4617
3.10544	0.195714	2.3238	0.146336		21	2.9125	2.8811	3.277	2.8905	3.4445	3.2858	3.0935	3.2384	3.0218	3.0093		21	2.5831	2.1447	2.1079	2.367	2.3932	2.3173	2.3687	2.1596	2.4009	2.3956
3.10186	0.328563	2.32285	0.169973		22	2.8115	2.5868	3.6433	3.221	3.228	3.4014	3.2319	3.2587	2.8743	2.7617		22	2.5055	2.1795	2.1485	2.3168	2.397	2.2899	2.3247	2.0647	2.6406	2.3613
3.08857	0.181136	2.25454	0.110248		23	2.8866	2.784	3.2892	3.1583	3.1884	3.2554	3.2736	3.1555	2.9579	2.9368		23	2.3411	2.2335	2.0946	2.3144	2.2708	2.2591	2.2307	2.0545	2.4133	2.3334
2.94556	0.290137	2.18595	0.110036		24	2.6003	2.5475	3.4524	2.7915	3.0161	2.9952	3.3552	3.0041	2.8701	2.8232		24	2.1703	2.2058	2.0346	2.2315	2.2291	2.201	2.1234	2.0002	2.3441	2.3195
2.9973	0.217001	2.213	0.123786		25	2.7164	2.9797	3.3075	2.668	3.0662	3.1329	2.9589	2.9564	3.3116	2.8754		25	2.2435	2.2039	2.0649	2.4195	2.251	2.1389	2.2581	1.9939	2.3367	2.2196
2.89199	0.154251	2.268	0.148408		26	3.042	2.7804	2.9381	2.6772	2.8364	2.8549	2.8999	2.9448	3.2081	2.7381		26	2.3323	2.2633	2.0915	2.3097	2.457	2.1602	2.1632	2.0656	2.5095	2.3277
2.76748	0.149643	2.22855	0.12653		27	2.5744	2.9198	2.7449	2.6255	2.8335	2.7612	2.9652	2.7019	2.9646	2.5838		27	2.2804	2.0795	2.1039	2.2972	2.3894	2.2124	2.1548	2.0678	2.4275	2.2726
2.78585	0.187612	2.20071	0.107295		28	2.4693	2.749	2.9849	2.6218	2.7301	2.9516	3.0415	2.8334	2.8901	2.5868		28	2.2515	2.0502	2.141	2.2713	2.2779	2.206	2.1458	2.0228	2.3372	2.3034
2.68319	0.224658	2.19354	0.10449		29	2.6046	2.4467	2.6631	2.3989	2.743	2.629	3.1868	2.8729	2.7197	2.5672		29	2.1706	2.0869	2.1099	2.258	2.2451	2.186	2.2208	2.0046	2.3099	2.3436
2.5668	0.185889	2.17481	0.0937392		30	2.4942	2.3676	2.7607	2.3295	2.7292	2.647	2.7579	2.783	2.3943	2.4046		30	2.1954	2.1626	2.0172	2.2258	2.1746	2.1452	2.2121	2.0388	2.3361	2.2403
2.56346	0.112797	2.13087	0.0971847		31	2.4599	2.5345	2.6562	2.3973	2.7166	2.5289	2.6173	2.7058	2.4284	2.5897		31	2.1777	2.1414	2.0343	2.1507	2.2343	2.0641	2.0828	1.9658	2.2962	2.1614
2.49272	0.0814956	2.13803	0.104393		32	2.4284	2.5729	2.4959	2.6255	2.5983	2.4873	2.4534	2.46	2.3746	2.4309		32	2.1198	2.166	1.9613	2.2197	2.1632	2.1496	2.0932	1.981	2.2748	2.2517
2.48591	0.110984	2.15718	0.119225		33	2.6366	2.254	2.4175	2.6213	2.5046	2.5473	2.4461	2.5133	2.5009	2.4175		33	2.1507	2.1687	1.9767	2.1634	2.2249	2.3142	2.1401	1.9364	2.2373	2.2594
2.45126	0.117299	2.13259	0.0986196		34	2.4674	2.2293	2.4304	2.4323	2.5028	2.5417	2.6659	2.5052	2.3619	2.3757		34	2.1634	2.0441	1.9988	2.1436	2.2002	2.1703	2.1269	1.9838	2.3031	2.1917
2.41271	0.192253	2.13548	0.0961327		35	2.4586	2.2452	2.3552	2.3824	2.6156	2.2935	2.7254	2.6436	2.1563	2.2513		35	2.0722	2.1241	1.9772	2.1357	2.1784	2.1324	2.1031	2.0988	2.1786	2.3543
2.40707	0.143184	2.16064	0.107307		36	2.4004	2.2099	2.3371	2.4655	2.5729	2.4541	2.6289	2.5019	2.2462	2.2538		36	2.2048	2.1308	1.972	2.1404	2.2417	2.2057	2.2246	1.9798	2.2199	2.2867
2.33927	0.114909	2.14114	0.120372		37	2.272	2.3247	2.3904	2.3172	2.4435	2.3566	2.4802	2.4644	2.1076	2.2361		37	2.1477	2.0053	2.0163	2.1547	2.1677	2.2499	2.1146	1.9729	2.2219	2.3604
2.32336	0.130506	2.14827	0.105361		38	2.2689	2.2766	2.2744	2.3811	2.554	2.2878	2.4329	2.4412	2.0967	2.22		38	2.1463	2.116	1.9596	2.1162	2.2741	2.1381	2.1996	2.0122	2.2553	2.2653
2.29335	0.119951	2.12563	0.125063		39	2.249	2.2973	2.287	2.4249	2.4738	2.1868	2.4214	2.3156	2.1104	2.1673		39	2.0912	2.1111	1.9272	2.1419	2.1752	2.2042	2.0943	1.9381	2.3263	2.2468
2.30182	0.131991	2.12852	0.110166		40	2.1886	2.3508	2.3383	2.4736	2.4282	2.1965	2.4556	2.2998	2.0733	2.2135		40	2.1555	2.055	2.0925	2.0702	2.1763	2.1888	2.0654	1.9327	2.2128	2.336
2.26246	0.132486	2.1251	0.0863573		41	2.2182	2.1661	2.3293	2.3179	2.3253	2.1355	2.4646	2.4174	2.0342	2.2161		41	2.1434	2.112	2.0041	2.1515	2.1907	2.1947	2.0986	1.9611	2.2425	2.1524
2.27975	0.105356	2.11495	0.0692485		42	2.2955	2.2074	2.2607	2.3871	2.447	2.1754	2.3994	2.2998	2.1352	2.19		42	2.1479	2.0785	2.1174	2.1508	2.1053	2.0731	2.1237	1.9943	2.265	2.0935
2.28518	0.122214	2.1573	0.0943317		43	2.32	2.1721	2.3686	2.3762	2.4097	2.1712	2.4364	2.3434	2.1121	2.1421		43	2.2093	2.086	2.0657	2.0881	2.1151	2.1576	2.1784	2.0586	2.2734	2.3408
2.28296	0.0965138	2.14283	0.100614		44	2.2883	2.3372	2.3703	2.3582	2.4243	2.1512	2.2601	2.3114	2.145	2.1836		44	2.249	2.0588	2.1015	2.0735	2.151	2.2103	2.1298	1.9505	2.2702	2.2337
2.24547	0.0999382	2.17082	0.11126		45	2.2761	2.1526	2.3236	2.2871	2.4201	2.1416	2.3183	2.2624	2.1668	2.1061		45	2.2078	2.0882	2.1168	2.0918	2.1402	2.2144	2.1619	1.9992	2.3734	2.3145
2.27445	0.113826	2.1689	0.09346		46	2.345	2.3247	2.2435	2.2924	2.3601	2.1265	2.3828	2.4141	2.0814	2.174		46	2.1599	2.1827	1.9867	2.2149	2.2861	2.1973	2.1746	2.0305	2.2619	2.1944
2.26339	0.0931009	2.12777	0.106392		47	2.2964	2.2901	2.2967	2.3004	2.225	2.145	2.2989	2.454	2.1833	2.1441		47	2.0401	2.1299	1.9416	2.174	2.1536	2.2004	2.1729	1.988	2.2901	2.1871
2.26934	0.118808	2.11893	0.0862158		48	2.1748	2.363	2.2722	2.2325	2.3469	2.0615	2.4196	2.4277	2.1776	2.2176		48	1.9943	2.1046	2.0291	2.1531	2.176	2.1287	2.1344	2.0292	2.2902	2.1497
2.26548	0.126073	2.12092	0.107777		49	2.2436	2.3884	2.2702	2.3997	2.4047	2.0492	2.3609	2.2654	2.1162	2.1565		49	2.0836	2.0029	2.0241	2.1839	2.1828	2.0978	2.0344	2.0384	2.3363	2.225
2.20997	0.116879	2.09049	0.0919993		50	2.1478	2.246	2.2359	2.3046	2.4325	2.0247	2.2982	2.1359	2.1228	2.1513		50	2.1267	2.0301	2.0627	2.1116	2.1174	2.0619	1.9668	1.9867	2.286	2.155
2.26538	0.0930018	2.08984	0.116675		51	2.1723	2.3741	2.2383	2.2301	2.3593	2.1246	2.3978	2.3237	2.2401	2.1935		51	2.099	1.9639	2.0173	2.1741	2.07	2.1788	1.9939	1.9191	2.2708	2.2115
2.24076	0.108442	2.07945	0.110447		52	2.2984	2.2455	2.2325	2.1309	2.2634	2.1511	2.4008	2.4133	2.0889	2.1828		52	2.0866	1.9584	1.9915	2.0578	1.9839	2.0667	2.1245	2.0208	2.3311	2.1732
2.28834	0.0891267	2.09406	0.0976264		53	2.3086	2.3531	2.225	2.3581	2.2938	2.1877	2.373	2.4178	2.1532	2.2131		53	2.0884	1.9658	2.108	2.075	2.0546	2.0324	2.0892	2.0353	2.3289	2.163
2.23748	0.0913792	2.0703	0.072576		54	2.3614	2.2679	2.1699	2.2642	2.1873	2.1378	2.357	2.3355	2.1673	2.1265		54	2.0962	2.0035	2.1046	2.0998	2.0619	2.0279	2.0147	1.9502	2.1645	2.1797
2.22008	0.100331	2.04289	0.0938976		55	2.2727	2.2185	2.2966	2.1718	2.2037	2.1828	2.3772	2.2771	1.997	2.2034		55	2.0762	1.9148	1.97	2.0068	2.0952	2.0764	1.9314	2.0162	2.223	2.1189
2.24211	0.0862697	2.0442	0.0971101		56	2.3309	2.1478	2.3414	2.2045	2.1776	2.2319	2.3864	2.2703	2.1406	2.1897		56	2.1378	1.9418	1.9483	2.0053	2.0833	2.1329	1.9636	1.9514	2.2179	2.0597
2.24915	0.106538	2.11404	0.0858882		57	2.4125	2.2208	2.2383	2.273	2.175	2.184	2.456	2.2194	2.1969	2.1156		57	2.0512	2.0452	2.1075	2.1729	2.0557	2.1281	2.0705	2.0185	2.2957	2.1951
2.19161	0.131725	2.02563	0.0853127		58	2.256	2.3528	2.0929	2.2448	2.1634	2.1427	2.4042	2.2236	1.975	2.0607		58	1.9657	1.9875	1.9235	2.0141	2.0912	2.0496	1.9582	1.9716	2.2102	2.0847
2.15237	0.100518	2.03533	0.084331		59	2.2634	2.2297	2.0722	2.1908	2.1372	2.0539	2.2825	2.17	1.959	2.165		59	1.9723	1.9233	1.9921	1.953	2.0813	2.1143	2.0228	1.9882	2.1674	2.1386
2.20303	0.0738542	2.0433	0.105129		60	2.2331	2.1919	2.1318	2.2199	2.1752	2.1306	2.3859	2.2226	2.1519	2.1874		60	2.1101	1.8707	2.0444	1.9856	2.177	2.1155	1.9501	1.9902	2.1996	1.9898
2.2266	0.131152	2.05505	0.0804962		61	2.2376	2.2294	2.2404	2.2517	2.2024	2.0135	2.4625	2.3686	2.0482	2.2117		61	2.1579	1.9839	2.0111	2.0389	2.0542	2.0145	2.0518	1.9411	2.2132	2.0839
2.17647	0.117097	1.99152	0.0818915		62	2.1875	2.3053	2.1849	2.2345	2.2167	2.0498	2.3248	2.2396	2.0593	1.9623		62	2.0239	1.9073	2.0107	2.0018	1.9115	1.9637	1.9755	1.8876	2.1499	2.0833
2.16306	0.0882728	2.02982	0.0819151		63	2.1782	2.2584	2.2409	2.1509	2.2225	2.0832	2.2914	2.081	2.0853	2.0388		63	2.0188	2.0337	1.9214	2.0062	2.041	2.0825	1.9851	1.9109	2.1625	2.1361
2.12048	0.113043	2.04441	0.081		64	2.2589	2.2316	2.1233	2.0335	2.0646	2.0856	2.2773	1.9048	2.1259	2.0993		64	2.1268	1.9916	1.9523	1.9943	2.0424	2.1514	1.9681	1.9603	2.1273	2.1296
2.16906	0.113414	2.04968	0.112776		65	2.1865	2.1967	2.2146	2.0959	2.066	2.1037	2.4453	2.0501	2.1967	2.1351		65	2.2062	2.0437	1.948	1.9236	1.962	2.1602	1.9765	1.9442	2.1751	2.1573
2.18645	0.0899575	2.05421	0.126296		66	2.2514	2.1208	2.1958	2.2571	2.1466	2.1045	2.3874	2.0962	2.1582	2.1465		66	2.2602	1.9874	2.0094	1.987	1.9507	2.1061	1.9546	1.8933	2.2091	2.1843
2.37685	0.0743559	2.18491	0.0906563		67	2.429	2.3483	2.4176	2.2993	2.3145	2.3105	2.5178	2.4602	2.3306	2.3407		67	2.2424	2.1005	2.1183	2.1205	2.1448	2.1764	2.1557	2.1139	2.3509	2.3257
2.20317	0.113807	1.9962	0.0740074		68	2.2356	2.1437	2.1971	2.2709	2.0322	2.1061	2.4566	2.2443	2.1512	2.194		68	2.0337	1.9992	2.0289	1.9415	1.9857	1.9804	1.938	1.8628	2.1305	2.0613
2.21748	0.104701	2.0257	0.0759384		69	2.2624	2.3178	2.1789	2.1204	2.0096	2.2439	2.3377	2.3341	2.1568	2.2132		69	2.1537	1.9887	2.0042	2.0263	2.0217	1.9661	1.9871	1.9019	2.1276	2.0797
2.19417	0.108342	2.00498	0.100274		70	2.106	2.2364	2.2016	2.1881	2.1813	2.081	2.3488	2.2351	2.0127	2.3507		70	1.9115	1.9372	1.9472	1.9068	2.0173	2.0754	2.068	1.8884	2.1526	2.1454
2.18471	0.110917	2.02807	0.0842088		71	2.2016	2.0572	2.1342	2.1801	2.2026	2.0239	2.285	2.3041	2.0929	2.3655		71	2.1054	2.0649	1.9843	1.9217	1.9755	1.987	2.0306	1.9461	2.2041	2.0611
2.23519	0.102888	2.03235	0.0719474		72	2.116	2.2362	2.2834	2.2276	2.22	2.0706	2.3597	2.3514	2.1381	2.3489		72	2.011	1.9296	1.9958	1.9351	2.0896	1.9886	2.094	2.0381	2.1276	2.1141
2.18776	0.0747933	2.02759	0.093637		73	2.2448	2.1049	2.2386	2.2055	2.1712	2.0298	2.1932	2.2503	2.1643	2.275		73	2.0756	2.0823	1.9545	1.8967	2.0173	1.9842	2.0769	1.8997	2.105	2.1837
2.17122	0.0673731	2.02221	0.0885789		74	2.1691	2.1517	2.1794	2.229	2.0818	2.0755	2.246	2.2097	2.1061	2.2639		74	2.0815	2.0303	1.8939	1.932	2.013	2.0685	2.0729	1.9062	2.1755	2.0483
2.17749	0.0702875	2.02281	0.0880765		75	2.1745	2.2698	2.165	2.1392	2.2757	2.0402	2.2279	2.1799	2.1205	2.1822		75	1.9794	2.0815	1.9759	1.9749	2.0338	1.982	2.1728	1.8803	2.1452	2.0023
2.20498	0.0926859	2.0888	0.0949105		76	2.1781	2.1416	2.1982	2.2453	2.3106	2.1135	2.2088	2.2416	2.0479	2.3642		76	2.1722	2.0741	2.0375	2.0167	2.1595	2.0492	2.2502	1.9121	2.1354	2.0811
2.20016	0.123982	2.04271	0.0852244		77	2.2027	2.1417	2.1413	2.2171	2.2442	2.0065	2.2839	2.2251	2.0766	2.4625		77	2.001	2.0068	1.9738	1.9652	2.1061	2.0942	2.1589	1.9001	2.1412	2.0798
2.19956	0.123625	2.06111	0.0850821		78	2.2791	2.1567	2.1161	2.2249	2.4128	2.0354	2.1729	2.1943	2.0458	2.3576		78	2.1038	1.996	1.9954	2.0876	2.0644	2.0433	2.2022	1.8986	2.1464	2.0734
2.19879	0.171791	2.03679	0.0924188		79	2.29	2.1881	2.1283	2.1451	2.4805	2.03	2.0866	2.1054	2.0315	2.5024		79	2.1655	1.9563	1.9911	1.9848	2.1188	2.1407	2.0376	1.8745	2.0986	2
2.2313	0.142251	2.10512	0.117623		80	2.2612	2.2147	2.1765	2.1852	2.499	2.0731	2.1552	2.2608	2.0537	2.4336		80	2.1369	2.0305	2.0017	2.0369	2.0834	2.2238	2.2144	1.9067	2.2961	2.1208
2.17784	0.152766	2.09738	0.121187		81	2.1466	2.1391	2.214	2.0907	2.419	2.0589	2.1773	2.1552	1.9382	2.4394		81	2.1429	2.0084	1.9778	1.9885	2.0338	2.233	2.295	1.9795	2.2394	2.0755
2.19008	0.13567	2.05961	0.11956		82	2.1657	2.1049	2.2384	2.1729	2.4343	2.0566	2.2164	2.0943	2.0254	2.3919		82	2.0907	2.0712	1.9576	1.9403	1.9955	2.1312	2.3296	1.9324	2.1196	2.028
2.15388	0.145967	2.02749	0.115054		83	2.1215	2.0177	2.1002	2.1244	2.5038	2.084	2.2577	2.1108	1.9987	2.22		83	2.1417	1.951	1.9006	1.9546	2.0336	2.0655	2.2181	1.854	2.1319	2.0239
2.15623	0.180111	2.08694	0.113741		84	2.0513	2.1257	2.0412	2.1451	2.5941	2.084	2.2011	2.0856	1.9444	2.2898		84	2.2	2.0009	1.9707	1.9474	2.1133	2.1484	2.2833	1.9572	2.142	2.1062
2.20581	0.205285	2.083	0.126589		85	2.1722	2.146	2.077	2.1334	2.6528	2.0023	2.207	2.2113	1.993	2.4631		85	2.1542	2.0148	1.8889	1.9708	2.1556	2.1921	2.2536	1.9171	2.1839	2.099
2.21098	0.117802	2.10356	0.158839		86	2.1293	2.268	2.2193	2.2504	2.4135	2.0955	2.113	2.1768	2.0671	2.3769		86	2.2792	2.1478	1.8518	1.9855	2.1234	2.1541	2.3609	1.8875	2.136	2.1094
2.25793	0.170238	2.16583	0.176262		87	2.1904	2.3031	2.1598	2.0799	2.5916	2.1394	2.2719	2.2848	2.0722	2.4862		87	2.2434	2.2435	1.9635	1.9632	2.2071	2.348	2.4459	1.908	2.2215	2.1142
2.24706	0.199317	2.12202	0.161686		88	2.1268	2.1913	2.1398	2.244	2.6045	2.1614	2.2236	2.1652	2.0079	2.6061		88	2.2059	2.1505	1.9672	1.9447	2.2918	2.2564	2.2676	1.832	2.247	2.0571
2.2251	0.155338	2.12903	0.157392		89	2.053	2.1469	2.1516	2.2173	2.4924	2.1425	2.1531	2.3464	2.0828	2.465		89	2.0998	2.0486	1.9834	2.0807	2.1462	2.289	2.4465	1.9309	2.2469	2.0183
2.22486	0.110962	2.08838	0.185153		90	2.2068	2.236	2.2412	2.1772	2.4536	2.0375	2.2238	2.2523	2.1121	2.3081		90	2.1575	2.0575	1.8388	1.9198	2.0888	2.3569	2.373	1.9046	2.2056	1.9813
2.224	0.155792	2.12839	0.193475		91	2.1812	2.1883	2.1682	2.179	2.5448	2.0706	2.1646	2.1655	2.104	2.4738		91	2.2556	2.0629	1.8883	2.0319	2.3035	2.2573	2.4832	1.8914	2.1232	1.9866
2.23787	0.167839	2.13863	0.178418		92	2.0494	2.2322	2.1656	2.1978	2.5521	2.14	2.187	2.37	2.0389	2.4457		92	2.2144	2.1212	1.8942	2.0387	2.4751	2.2014	2.3049	1.8961	2.1768	2.0635
2.22763	0.224425	2.0954	0.136171		93	2.093	2.1367	2.0684	2.1757	2.6992	2.0601	2.0597	2.2753	2.1468	2.5614		93	2.1315	2.0413	1.9872	1.9587	2.1811	2.2061	2.3597	1.8952	2.1335	2.0597
2.16234	0.194212	2.13836	0.17257		94	2.1031	2.0538	2.0806	2.0906	2.6496	2.0519	2.0272	2.2044	2.0362	2.326		94	2.0827	2.1648	1.9848	2.001	2.3595	2.2375	2.4013	1.8338	2.1712	2.147
2.26434	0.240184	2.0949	0.209771		95	2.1058	2.2236	2.2763	2.2897	2.713	2.0202	2.1858	2.0979	2.0686	2.6625		95	2.0762	2.1122	1.8648	1.9981	2.2274	2.1724	2.5759	1.8367	2.0975	1.9878
2.2272	0.209458	2.0909	0.15985		96	2.0754	2.2963	2.1384	2.2913	2.6068	2.0037	2.1304	2.2275	1.9768	2.5254		96	2.0394	2.157	1.8549	1.9446	2.2444	2.2373	2.3125	1.8689	2.1332	2.1168
2.26387	0.194428	2.14005	0.185294		97	2.1171	2.3267	2.1606	2.2963	2.7023	2.1249	2.1673	2.3068	2.0232	2.4135		97	2.2083	2.2295	1.9074	1.9939	2.4492	2.2018	2.3564	1.8779	2.1044	2.0717
2.21647	0.178553	2.07899	0.169422		98	2.022	2.2393	2.1176	2.2182	2.5957	2.0642	2.0953	2.257	2.1228	2.4326		98	2.1447	2.1228	1.8736	1.904	2.259	2.222	2.2967	1.8125	2.1406	2.014
2.25853	0.221235	2.12425	0.169375		99	2.0499	2.2811	2.2467	2.1905	2.7134	2.0977	2.1175	2.2634	2.0545	2.5706		99	2.1679	2.1063	1.9178	2.0162	2.3945	2.227	2.3296	1.8509	2.1391	2.0932
2.21206	0.202824	2.13584	0.192088		100	2.0084	2.2111	2.1229	2.3268	2.5499	2.0555	2.1466	2.194	1.9689	2.5365		100	2.1989	2.1142	1.9156	2.0377	2.5302	2.1542	2.3789	1.951	2.067	2.0107
2.24559	0.193844	2.14508	0.149815		101	2.1726	2.2222	2.1179	2.2561	2.6959	2.2074	2.1199	2.1569	2.0439	2.4631		101	2.2962	2.2166	1.9675	2.0956	2.2548	2.2064	2.3533	1.9053	2.1621	1.993
2.25243	0.292838	2.08488	0.169456		102	2.1731	2.2147	2.0797	2.156	2.9368	2.1462	2.1201	2.0472	2.0294	2.6211		102	2.2091	2.1537	1.8468	1.9721	2.2973	2.2006	2.2719	1.8251	2.0757	1.9965
2.22129	0.22929	2.12826	0.205306		103	2.1071	2.2357	2.2048	2.1096	2.7767	2.1057	2.1295	2.0957	1.9992	2.4489		103	2.1158	2.2668	1.8896	1.9883	2.5263	2.2715	2.2663	1.8631	2.0797	2.0152
2.2488	0.25007	2.1076	0.159735		104	1.9747	2.4002	2.2265	2.2025	2.757	2.1002	2.0665	2.148	2.0495	2.5629		104	2.1534	2.2114	1.9144	2.0219	2.3657	2.1419	2.2686	1.8357	2.1208	2.0422
2.24763	0.25929	2.11585	0.207645		105	2.042	2.4811	2.2094	2.2324	2.6686	2.0272	2.1216	2.0403	2.0033	2.6504		105	2.1225	2.1507	1.8342	2.1802	2.3927	2.299	2.3686	1.7961	2.0486	1.9659
2.23071	0.264234	2.11279	0.200317		106	2.0963	2.2028	2.1219	2.2062	2.8454	2.1234	2.0989	2.0249	2.029	2.5583		106	2.137	2.2256	1.8442	2.2052	2.5022	2.1593	2.2088	1.8243	2.0064	2.0149
2.29899	0.288713	2.12664	0.173397		107	2.0534	2.5233	2.1734	2.2242	2.9066	2.0509	2.1683	2.2363	2.0396	2.6139		107	2.1237	2.1677	1.9501	2.1315	2.4308	2.3147	2.1884	1.8173	2.1167	2.0255
2.31596	0.268771	2.08195	0.126831		108	2.1719	2.3552	2.3472	2.1367	2.8412	2.1472	2.1745	2.1486	2.0859	2.7512		108	2.1678	2.1021	1.9073	2.0506	2.226	2.2385	2.1691	1.8598	2.0732	2.0251
2.36855	0.237468	2.10316	0.168821		109	2.3106	2.3962	2.3374	2.3084	2.9668	2.1987	2.2938	2.1729	2.1666	2.5341		109	2.0609	2.1474	1.8427	2.1179	2.4049	2.3336	2.1461	1.9708	1.9773	2.03
2.32178	0.209656	2.11069	0.157937		110	2.192	2.3915	2.3516	2.1881	2.6865	2.2214	2.1563	2.1339	2.206	2.6905		110	2.2118	2.2999	1.9288	2.1744	2.2487	2.1842	2.2309	1.8338	1.9969	1.9975
2.42794	0.265558	2.13891	0.196263		111	2.4274	2.7259	2.3397	2.2648	2.7971	2.3418	2.2494	2.0328	2.2765	2.824		111	2.1581	2.4183	1.8347	2.1852	2.4069	2.208	2.2308	1.8833	2.02	2.0438
2.46144	0.3046	2.13159	0.158889		112	2.4412	2.6318	2.3081	2.382	3.1462	2.3836	2.2225	2.04	2.3609	2.6981		112	2.1996	2.3341	1.9304	2.2057	2.2895	2.2871	2.1718	1.948	1.943	2.0067
2.5563	0.353714	2.13834	0.165436		113	2.4559	2.5928	2.5603	2.4904	3.2692	2.4789	2.211	2.1155	2.345	3.044		113	2.1491	2.3813	1.9436	2.1619	2.2974	2.2193	2.3158	1.937	1.9992	1.9788
2.45522	0.241083	2.13899	0.188337		114	2.5016	2.3401	2.5088	2.6504	2.904	2.5282	2.2481	2.0207	2.3101	2.5402		114	2.3285	2.2449	1.9062	2.1493	2.4172	2.2258	2.2785	1.9287	1.9256	1.9852
2.58946	0.298036	2.22664	0.21884		115	2.554	2.4667	2.7864	2.7284	3.1285	2.6095	2.3105	2.0361	2.4865	2.788		115	2.2226	2.4124	1.9011	2.2959	2.3677	2.5034	2.4737	1.9558	2.0233	2.1105
2.60165	0.35886	2.16114	0.1858		116	2.5864	2.2888	3.2067	2.6535	2.9904	2.4905	2.2953	2.0484	2.5084	2.9481		116	2.2877	2.2696	1.8516	2.2175	2.3389	2.3229	2.3486	1.9384	2.0336	2.0026
2.64997	0.367268	2.24671	0.25157		117	2.7914	2.4687	2.8193	2.6376	3.0556	2.7916	2.3846	1.9968	2.3197	3.2344		117	2.253	2.6957	1.9175	2.3742	2.3814	2.3738	2.442	1.9727	2.0441	2.0127
2.66519	0.305917	2.16103	0.202538		118	2.6787	2.6995	2.9208	2.4734	3.0545	2.9046	2.4309	2.0246	2.5657	2.8992		118	2.1922	2.4717	1.8422	2.3204	2.2084	2.3796	2.2306	1.9761	1.9854	2.0037
2.71077	0.271899	2.17879	0.181343		119	2.5544	2.737	2.7718	2.7695	2.9377	3.1273	2.5706	2.1077	2.6693	2.8624		119	2.1516	2.3473	1.9095	2.241	2.2076	2.4883	2.3393	2.0032	2.0049	2.0952
2.76921	0.307764	2.24222	0.199309		120	2.7529	2.7615	3.2895	2.5663	2.9484	2.9862	2.4697	2.1836	2.7988	2.9352		120	2.3005	2.4247	1.9785	2.3132	2.4648	2.3266	2.4968	2.0425	2.0584	2.0162
2.74195	0.250527	2.1968	0.201204		121	2.6708	2.635	2.9117	2.8151	3.0498	3.0573	2.5514	2.2363	2.6278	2.8643		121	2.4151	2.2825	1.8418	2.3744	2.3617	2.2278	2.3718	2.1146	1.9915	1.9868
2.82733	0.36023	2.22722	0.18736		122	2.7255	2.5231	2.8809	2.8954	3.0588	3.4805	2.7261	2.1032	2.8469	3.0329		122	2.4111	2.3887	1.9132	2.4618	2.2486	2.304	2.3484	2.107	2.0326	2.0568
2.79599	0.363109	2.26798	0.204494		123	2.6709	2.7053	2.9835	2.8835	3.1468	3.4992	2.6148	2.1433	2.7038	2.6088		123	2.3708	2.3929	1.9531	2.4275	2.3953	2.4262	2.4745	2.2336	2.0067	1.9992
2.757	0.322847	2.21666	0.169937		124	2.8079	2.7186	2.8357	2.7659	3.028	3.3666	2.4691	2.1396	2.8081	2.6305		124	2.1832	2.3293	1.96	2.4241	2.3528	2.3937	2.3385	2.0682	2.0454	2.0714
2.82381	0.330749	2.21453	0.233374		125	2.8542	2.7634	3.1422	2.6778	2.9092	3.4301	2.5717	2.1878	2.7706	2.9311		125	2.2966	2.0652	1.8717	2.5533	2.4999	2.3101	2.4237	2.0981	2.0158	2.0109
2.76745	0.358888	2.22971	0.207058		126	2.7004	2.655	2.6382	3.1674	3.0412	3.3705	2.4803	2.1089	2.8284	2.6842		126	2.1591	2.4465	1.9599	2.5606	2.2436	2.2732	2.4617	2.1506	2.0546	1.9873
2.9386	0.368327	2.24726	0.202923		127	2.9533	2.6136	2.9895	3.141	3.1191	3.2538	2.8537	2.1258	3.4566	2.8796		127	2.2954	2.4844	1.9736	2.5655	2.2294	2.3788	2.3489	2.0892	2.117	1.9904
2.88413	0.382573	2.29278	0.213639		128	2.8792	2.6903	3.4032	2.7328	3.1047	3.4975	2.5813	2.2025	2.8203	2.9295		128	2.4588	2.4456	1.9984	2.5343	2.1673	2.3867	2.5788	2.2225	2.1011	2.0343
2.78291	0.335333	2.29379	0.231326		129	2.7658	2.4728	3.0523	2.6667	3.1286	3.3397	2.5709	2.1927	2.7753	2.8643		129	2.3803	2.2675	1.9948	2.5151	2.5601	2.5073	2.5241	2.1201	2.016	2.0526
2.73013	0.34154	2.29371	0.233674		130	2.7664	2.6144	2.992	2.7899	2.9111	3.3755	2.4665	2.0768	2.6	2.7087		130	2.2149	2.2962	1.9831	2.5252	2.6728	2.3148	2.5855	2.1854	2.1145	2.0447
2.75254	0.373287	2.32923	0.337909		131	2.7767	2.4114	3.0241	2.7919	2.93	3.4051	2.4335	2.0569	2.8655	2.8303		131	2.0803	3.0798	1.9155	2.4076	2.4484	2.3637	2.6105	2.2093	2.1011	2.0761
2.75743	0.396627	2.23328	0.229639		132	2.6564	2.4702	3.166	2.9746	2.9941	3.3609	2.519	2.0021	2.5453	2.8857		132	2.1931	2.7176	1.9241	2.2051	2.2666	2.3317	2.4506	2.1693	2.077	1.9977
2.66592	0.308685	2.28637	0.257886		133	2.6672	2.4443	3.0013	2.6334	2.8485	3.1096	2.3857	2.0888	2.5951	2.8853		133	2.2102	2.9246	2.0964	2.1516	2.2416	2.3869	2.4429	2.2689	2.0495	2.0911
2.6948	0.247088	2.24103	0.159069		134	2.7084	2.558	2.8186	2.5529	2.876	3.1757	2.5527	2.2431	2.6859	2.7767		134	2.1332	2.4096	2.1181	2.2225	2.2368	2.4996	2.46	2.1646	2.0548	2.1111
2.74124	0.288869	2.31122	0.195046		135	2.6079	2.6088	3.0524	2.6629	2.8595	3.028	2.4476	2.1861	2.9145	3.0447		135	2.3408	2.5507	2.0534	2.3514	2.3717	2.3107	2.6606	2.2706	2.116	2.0863
2.68651	0.271279	2.33105	0.203802		136	2.3611	2.5348	3.0629	2.7198	3.0335	2.8602	2.6126	2.21	2.6975	2.7727		136	2.3404	2.5516	2.0559	2.339	2.3969	2.2976	2.7458	2.2957	2.1591	2.1285
2.6667	0.345093	2.28249	0.185459		137	2.5514	2.2235	2.9357	2.8625	3.1405	3.0019	2.3316	2.1307	2.7071	2.7821		137	2.359	2.5568	2.0811	2.2177	2.4684	2.3416	2.4883	2.174	2.0556	2.0824
2.58526	0.279843	2.248	0.190768		138	2.5468	2.2958	2.5802	2.8404	2.9292	2.7633	2.255	2.1109	2.8173	2.7137		138	2.2253	2.5481	2.0117	2.179	2.2976	2.5153	2.404	2.1841	2.0309	2.084
2.59478	0.305562	2.3318	0.26466		139	2.467	2.7101	2.5306	2.5183	3.2137	2.805	2.4454	2.0632	2.7824	2.4121		139	2.2119	2.4218	2.1534	2.4256	2.9238	2.2257	2.5964	2.1136	2.1413	2.1045
2.62724	0.240365	2.27003	0.151217		140	2.7373	2.5601	2.876	2.5588	2.8157	2.8308	2.3578	2.1328	2.5756	2.8275		140	2.2849	2.4451	2.0919	2.3306	2.4132	2.2667	2.4755	2.2246	2.0317	2.1361
2.66394	0.305287	2.31222	0.269834		141	2.7284	2.5571	3.3515	2.5844	2.6323	2.7005	2.3948	2.1667	2.8004	2.7233		141	2.323	2.9128	1.9889	2.2684	2.4906	2.3491	2.4375	2.244	2.0306	2.0773
2.69766	0.295095	2.23393	0.165556		142	2.5202	2.4542	3.1323	2.6554	2.9434	2.8148	2.5588	2.1639	3.0495	2.6841		142	2.2592	2.2592	2.1031	2.2109	2.4768	2.1976	2.5582	2.064	2.0939	2.1164
2.64496	0.31285	2.26261	0.165631		143	2.4621	2.2818	3.0451	2.5023	2.9775	2.8929	2.4789	2.178	2.9876	2.6434		143	2.2127	2.35	2.0713	2.4541	2.5719	2.2145	2.3555	2.188	2.0811	2.127
2.60464	0.246857	2.27319	0.161145		144	2.5668	2.3044	2.7155	2.411	2.8247	3.056	2.5848	2.2264	2.6612	2.6956		144	2.2526	2.3859	1.9988	2.4103	2.4909	2.326	2.4308	2.1674	2.1041	2.1651
2.51862	0.19037	2.26381	0.143314		145	2.3924	2.2946	2.6538	2.4721	2.658	2.7512	2.4327	2.1854	2.6711	2.6749		145	2.3844	2.4444	2.0196	2.3279	2.3881	2.3129	2.3449	2.1486	2.0993	2.168
2.65009	0.283772	2.30278	0.178389		146	2.3552	2.3896	2.9307	2.5357	3.0302	2.8791	2.5421	2.2124	2.7014	2.9245		146	2.3507	2.3612	2.0315	2.4815	2.4784	2.4109	2.5077	2.201	2.0999	2.105
2.64403	0.2233	2.31789	0.172067		147	2.7062	2.3748	3.0526	2.673	2.6175	2.8178	2.4998	2.2703	2.6727	2.7556		147	2.2504	2.3086	2.1812	2.3781	2.36	2.3884	2.7324	2.1995	2.1056	2.2747
2.62611	0.240216	2.25735	0.125249		148	2.362	2.692	2.8876	2.4337	2.8572	2.7212	2.6135	2.1463	2.7326	2.815		148	2.2292	2.3278	2.1235	2.3507	2.3272	2.3602	2.4672	2.1357	2.1267	2.1253
2.67614	0.262542	2.26042	0.142936		149	2.4908	2.4119	2.9527	2.4943	3.0416	2.7569	2.7649	2.2097	2.8268	2.8118		149	2.1097	2.3505	2.124	2.3899	2.4341	2.344	2.4394	2.1454	2.0943	2.1729
2.67094	0.298445	2.30092	0.210866		150	2.6167	2.3453	3.0542	2.5696	3.0514	2.6814	2.5541	2.161	3.0128	2.6629		150	2.1011	2.4003	2.2441	2.3474	2.6958	2.3344	2.57	2.0923	2.0953	2.1285
2.5756	0.226851	2.28129	0.210115		151	2.3746	2.715	2.7399	2.412	2.9798	2.681	2.4214	2.1947	2.654	2.5836		151	2.1216	2.3511	2.0828	2.5094	2.6747	2.2921	2.3756	2.3009	1.9952	2.1095
2.66594	0.195307	2.35805	0.23376		152	2.5757	2.5821	2.7661	2.5325	3.0532	2.8597	2.6462	2.3447	2.7154	2.5838		152	2.3425	2.6619	2.0702	2.4472	2.736	2.2901	2.5046	2.3386	2.0806	2.1088
2.57505	0.201114	2.29769	0.19261		153	2.4027	2.4468	2.5701	2.5661	2.9579	2.7621	2.3927	2.2967	2.6308	2.7246		153	2.4246	2.3354	2.0972	2.4302	2.6479	2.2219	2.4188	2.2849	2.0425	2.0735
2.61517	0.252097	2.29601	0.251929		154	2.4543	2.4816	2.7261	2.6717	3.1788	2.7076	2.3041	2.3317	2.7082	2.5876		154	2.34	2.2171	2.1385	2.4288	2.9344	2.1659	2.2002	2.3517	2.1061	2.0774
2.67634	0.336417	2.31277	0.290119		155	2.4288	2.536	2.9925	2.9612	3.3517	2.7005	2.3579	2.2465	2.6026	2.5857		155	2.2606	2.2485	2.0787	2.7976	2.8991	2.1768	2.1866	2.2504	2.1029	2.1265
2.61009	0.256295	2.3691	0.244518		156	2.4102	2.4456	2.8447	2.6604	2.9592	2.7367	2.3974	2.1445	2.8671	2.6351		156	2.0752	2.3167	2.3477	2.5919	2.8593	2.3599	2.5461	2.3537	2.081	2.1595
2.67179	0.288936	2.44572	0.359796		157	2.5377	2.5265	3.0043	2.4677	3.1173	2.779	2.3516	2.2554	2.9344	2.744		157	2.1706	2.5185	2.3921	2.8504	3.2449	2.2005	2.4784	2.3514	2.1652	2.0852
2.59636	0.225266	2.33898	0.225298		158	2.3245	2.4848	2.8588	2.6967	2.6461	2.9541	2.323	2.327	2.7019	2.6467		158	2.3513	2.7223	2.0365	2.2004	2.6264	2.2729	2.5332	2.3529	2.1612	2.1327
2.67357	0.432636	2.30973	0.204085		159	2.2573	2.3513	2.6998	3.5617	2.9327	3.0719	2.2566	2.228	2.5899	2.7865		159	2.189	2.6824	2.1902	2.4194	2.491	2.5176	2.267	2.1362	2.1244	2.0801
2.66045	0.274862	2.28662	0.144717		160	2.5515	2.5302	2.9087	2.8809	2.9174	2.9433	2.3033	2.2307	2.4662	2.8723		160	2.3112	2.4219	2.2284	2.3493	2.524	2.4043	2.281	2.1441	2.1385	2.0635
2.75239	0.336089	2.30207	0.219859		161	2.526	2.5152	2.8331	2.9412	2.9828	3.3943	2.4713	2.2003	2.7752	2.8845		161	2.4029	2.271	2.1607	2.3872	2.6478	2.6705	2.1816	2.1286	2.1222	2.0482
2.64097	0.296177	2.25517	0.229779		162	2.4777	2.46	2.6389	3.0861	2.721	3.1763	2.3928	2.2519	2.4952	2.7098		162	2.1876	2.304	2.1056	2.3216	2.7899	2.4605	2.1645	2.0955	2.0142	2.1083
2.66234	0.314826	2.29953	0.210538		163	2.5414	2.4592	2.8215	2.8434	3.1652	3.0075	2.323	2.2059	2.4279	2.8284		163	2.2972	2.4162	2.1983	2.323	2.7298	2.5106	2.2492	2.1668	2.0186	2.0856
2.72961	0.287257	2.29234	0.189869		164	2.4236	2.4996	3.0133	3.0485	2.9955	3.0527	2.4291	2.3452	2.7573	2.7313		164	2.33	2.4639	2.2035	2.4093	2.4953	2.5809	2.2061	2.0491	2.068	2.1173
2.65273	0.290365	2.36394	0.409176		165	2.424	2.3523	2.9248	3.0051	3.0314	2.8612	2.5289	2.2017	2.5413	2.6566		165	2.4347	2.303	2.1427	2.3958	3.4585	2.3179	2.3542	2.0664	2.0549	2.1113
2.7197	0.323737	2.35243	0.367371		166	2.4408	2.5404	2.7883	3.2322	3.0555	3.0022	2.4529	2.2574	2.5034	2.9239		166	2.1953	2.4471	2.1069	2.3984	3.2608	2.6123	2.2483	2.0765	2.1057	2.073
2.70061	0.27894	2.34379	0.246298		167	2.407	2.4733	2.7948	2.9947	3.051	3.0179	2.4989	2.2641	2.6929	2.8115		167	2.2845	2.4211	2.2435	2.3354	2.8022	2.6588	2.4452	2.1097	2.086	2.0515
2.66984	0.283189	2.37066	0.314961		168	2.3666	2.4019	2.8276	2.8326	3.1467	2.8423	2.4721	2.266	2.8869	2.6557		168	2.3221	2.4326	2.2659	2.3975	3.1078	2.6521	2.2612	2.1124	2.0478	2.1072
2.68075	0.255969	2.34589	0.367318		169	2.553	2.3909	2.9335	2.7434	3.0311	2.9248	2.5535	2.217	2.7695	2.6908		169	2.0946	2.2601	2.2807	2.4495	3.2594	2.6296	2.2014	2.1292	2.0489	2.1055
2.63806	0.251617	2.28025	0.215566		170	2.4698	2.5533	2.925	2.971	2.5778	2.7652	2.5393	2.1197	2.6156	2.8439		170	2.1927	2.3271	2.1932	2.4107	2.712	2.4802	2.2914	2.1726	1.989	2.0336
2.73078	0.334142	2.30299	0.167406		171	2.5674	2.6258	2.8808	3.4964	2.6919	2.9628	2.6597	2.2154	2.5937	2.6139		171	2.2998	2.3614	2.2411	2.4302	2.6174	2.4586	2.2685	2.1436	2.0897	2.1196
2.70927	0.235909	2.27212	0.132395		172	2.5835	2.6488	2.9176	3.1308	2.8584	2.7778	2.5437	2.2807	2.7758	2.5756		172	2.3555	2.2313	2.2247	2.3202	2.3789	2.5552	2.2121	2.1704	2.1027	2.1702
2.71937	0.217527	2.41298	0.290893		173	2.6719	2.7571	2.7671	2.5915	2.9801	2.7977	2.4227	2.3529	3.0299	2.8228		173	2.2924	2.5509	2.181	2.7129	2.7895	2.8749	2.249	2.1595	2.0898	2.2299
2.65291	0.289909	2.27612	0.137885		174	2.3248	2.5982	2.7013	2.8483	3.0793	2.8156	2.3924	2.1736	2.9672	2.6284		174	2.2802	2.3269	2.1984	2.4155	2.4112	2.5103	2.2261	2.1583	2.0782	2.1561
2.70836	0.246292	2.31026	0.174653		175	2.5812	2.7252	2.8042	2.9871	2.951	2.774	2.453	2.2115	2.9582	2.6382		175	2.2249	2.4626	2.1379	2.4676	2.5261	2.5124	2.3762	2.0981	2.162	2.1348
2.66853	0.221702	2.30087	0.161949		176	2.4863	2.6752	2.8553	3.0078	2.9686	2.7268	2.4698	2.3435	2.6174	2.5346		176	2.279	2.4338	2.2206	2.4476	2.4612	2.5144	2.3342	2.0573	2.1297	2.1309
2.69807	0.271952	2.33943	0.226338		177	2.3956	2.6352	2.8925	2.9966	3.1492	2.8997	2.4779	2.3376	2.6172	2.5792		177	2.2068	2.5989	2.1662	2.3894	2.6291	2.6944	2.3172	2.09	2.1434	2.1589
2.61123	0.233609	2.33312	0.208644		178	2.4666	2.7	2.8826	2.7891	2.6906	2.8297	2.2924	2.1655	2.6522	2.6436		178	2.2598	2.493	2.1523	2.5492	2.2939	2.7508	2.3853	2.1286	2.1731	2.1452
2.74588	0.270187	2.34407	0.183763		179	2.6122	2.5407	2.9444	3.024	2.8418	3.1008	2.5014	2.329	3.0156	2.5489		179	2.2983	2.4992	2.1815	2.3944	2.4173	2.7522	2.3386	2.1904	2.151	2.2178
2.82154	0.266227	2.3362	0.224571		180	2.6835	2.7016	2.8766	3.1624	3.1934	2.9872	2.6166	2.2983	2.8821	2.8137		180	2.2038	2.6553	2.198	2.3541	2.3591	2.7296	2.4906	2.1326	2.1025	2.1364
2.77362	0.335133	2.3647	0.187612		181	2.4224	2.3144	2.6877	3.1348	3.0908	3.2786	2.5865	2.4386	2.9554	2.827		181	2.2916	2.5469	2.1758	2.4335	2.6168	2.6447	2.378	2.1728	2.183	2.2039
2.78712	0.288122	2.39404	0.223357		182	2.3685	2.6008	2.8653	3.3452	2.9089	3.0763	2.5799	2.5448	2.6921	2.8894		182	2.2648	2.8124	2.2596	2.5786	2.4219	2.6474	2.4004	2.2001	2.244	2.1112
2.8016	0.318608	2.40566	0.199354		183	2.3449	2.8914	2.9336	3.1445	2.6778	2.9227	2.5763	2.2816	3.0668	3.1764		183	2.3029	2.5657	2.3648	2.5378	2.4579	2.7993	2.4432	2.2609	2.2047	2.1194
2.72868	0.210463	2.36315	0.220928		184	2.5209	2.6796	2.7935	3.0144	2.8562	3.0303	2.5416	2.4023	2.628	2.82		184	2.2714	2.8357	2.1619	2.3109	2.3675	2.6236	2.4347	2.2907	2.0983	2.2368
2.77032	0.364387	2.33357	0.205529		185	2.5824	2.3004	2.9582	3.2062	3.4706	2.8447	2.5256	2.4167	2.5929	2.8055		185	2.1228	2.6108	2.2178	2.2937	2.4657	2.6889	2.4445	2.1833	2.1751	2.1331
2.78173	0.357345	2.46253	0.317699		186	2.4383	2.4147	2.7857	3.4832	3.1744	2.9995	2.4715	2.459	2.7628	2.8282		186	2.2972	3.1146	2.2284	2.3866	2.4595	2.9736	2.4037	2.2572	2.2487	2.2558
2.7863	0.310348	2.4152	0.260148		187	2.4631	2.4986	2.8374	3.1695	3.1068	3.2192	2.5089	2.3939	2.8817	2.7839		187	2.3305	2.7443	2.2394	2.6686	2.5546	2.7844	2.4285	2.1691	2.1571	2.0755
2.78178	0.319469	2.40302	0.244579		188	2.433	2.7035	2.8691	3.0698	2.7941	3.4643	2.4695	2.4268	2.7218	2.8659		188	2.5568	2.7073	2.1848	2.6648	2.3978	2.7089	2.3848	2.0887	2.2065	2.1298
2.76533	0.24951	2.34729	0.235428		189	2.496	2.7177	2.7737	3.1714	2.8356	3.1472	2.48	2.4999	2.6713	2.8605		189	2.3075	2.4402	2.1365	2.7678	2.3434	2.7284	2.2976	2.1801	2.1684	2.103
2.76095	0.277581	2.31289	0.236096		190	2.3548	2.8792	2.9157	3.1064	2.8204	3.1467	2.4659	2.4137	2.6787	2.828		190	2.2129	2.3108	2.1015	2.838	2.3241	2.6114	2.2805	2.1751	2.1248	2.1498
2.74459	0.278921	2.33885	0.188374		191	2.5714	2.3529	3.1817	3.0307	2.7654	3.0398	2.622	2.3976	2.8442	2.6402		191	2.4334	2.2804	2.1714	2.4797	2.4092	2.7443	2.3653	2.1909	2.1343	2.1796
2.81117	0.323934	2.43182	0.20954		192	2.354	2.9242	2.9242	3.2605	2.9799	3.2092	2.5019	2.3919	2.628	2.9379		192	2.4132	2.4425	2.3675	2.5951	2.6091	2.8265	2.4826	2.1736	2.1611	2.247
2.67241	0.242675	2.36139	0.153086		193	2.4817	2.7061	2.8343	2.7585	2.868	3.0755	2.3626	2.3094	2.541	2.787		193	2.2586	2.3237	2.2473	2.5588	2.4541	2.6329	2.4579	2.2529	2.2161	2.2116
2.87075	0.287694	2.41181	0.210089		194	2.5778	2.9294	3.0475	3.0697	3.0778	3.0803	2.5277	2.3166	3.1291	2.9516		194	2.4055	2.7005	2.287	2.2594	2.3925	2.8488	2.4555	2.1807	2.3126	2.2756
2.82705	0.344757	2.40316	0.252369		195	2.3229	2.8173	2.8717	2.9842	3.1243	3.1502	2.403	2.4189	2.852	3.326		195	2.418	2.4497	2.2432	2.9621	2.3582	2.6911	2.3499	2.1465	2.2364	2.1765
2.75717	0.306627	2.45266	0.210182		196	2.3942	2.6414	2.7845	2.5616	2.7974	3.1383	2.5802	2.4665	2.8218	3.3858		196	2.5508	2.7656	2.2817	2.6378	2.3803	2.7143	2.4918	2.2835	2.2619	2.1589
2.85072	0.349301	2.38471	0.22181		197	2.7196	2.8303	3.0545	2.65	3.1231	3.3121	2.4032	2.4079	2.6367	3.3698		197	2.4965	2.491	2.0533	2.4115	2.5028	2.8425	2.3906	2.2326	2.2512	2.1751
2.91399	0.322272	2.44798	0.254797		198	2.742	2.9956	3.381	2.7595	3.0205	3.005	2.7728	2.3808	2.6539	3.4288		198	2.5807	2.5109	2.2196	2.5926	2.5593	2.9799	2.4402	2.2584	2.2063	2.1319
2.88336	0.300301	2.438	0.23755		199	2.5695	2.967	3.035	2.6816	3.0949	3.1627	2.7176	2.3079	3.0482	3.2492		199	2.3535	2.4183	2.2801	2.5623	2.4898	3.0375	2.4357	2.3516	2.235	2.2162
2.78258	0.290458	2.37036	0.221926		200	2.4671	2.9567	2.9838	2.6133	2.9395	3.1958	2.6436	2.2615	2.7176	3.0469		200	2.2995	2.2631	2.1987	2.6065	2.5404	2.7825	2.5055	2.1749	2.2046	2.1279
2.81968	0.293829	2.43613	0.308684		201	2.5801	3.1467	2.729	2.8678	2.7019	3.1993	2.5026	2.3515	3.1294	2.9885		201	2.5219	2.3528	2.2645	2.285	3.1277	2.7122	2.5663	2.0678	2.2409	2.2222
2.75468	0.242111	2.38134	0.107991		202	2.4368	2.5177	2.7712	2.8166	3.0795	3.1021	2.6493	2.4651	2.7419	2.9666		202	2.4611	2.3765	2.3335	2.4049	2.4475	2.543	2.4885	2.2177	2.3044	2.2363
2.82841	0.315154	2.42724	0.200752		203	2.4916	2.8532	3.2079	2.7119	3.3148	3.1412	2.496	2.4136	2.7756	2.8783		203	2.3835	2.5233	2.3727	2.572	2.4104	2.7917	2.6105	2.2784	2.1405	2.1894
2.72183	0.2927	2.43896	0.225591		204	2.3678	2.5946	2.8878	2.628	2.9783	3.0393	2.534	2.2741	2.7571	3.1573		204	2.4638	2.3987	2.3134	2.9005	2.5527	2.6676	2.4694	2.2201	2.2154	2.188
2.73488	0.267224	2.44075	0.224789		205	2.5485	2.6234	2.8804	2.754	2.7107	3.215	2.4116	2.5096	2.5631	3.1325		205	2.3282	2.6021	2.3423	2.8368	2.5331	2.6054	2.5907	2.2011	2.2157	2.1521
2.87708	0.250964	2.44729	0.185842		206	2.6481	2.9264	2.9976	2.972	3.0127	3.2993	2.7318	2.4065	2.7317	3.0447		206	2.4266	2.3813	2.4343	2.6015	2.418	2.676	2.7828	2.2634	2.2321	2.2569
2.81766	0.259304	2.45442	0.211094		207	2.5755	2.9674	2.876	2.7092	2.7897	3.3244	2.6591	2.3826	2.9027	2.99		207	2.4086	2.4278	2.3883	2.4374	2.4469	2.9606	2.6389	2.3095	2.3304	2.1958
2.83636	0.224881	2.49612	0.256865		208	2.6753	3.1881	3.0171	2.8157	2.91	3.1046	2.7292	2.4398	2.677	2.8068		208	2.3515	2.5434	2.2679	2.8202	2.5786	2.9729	2.6165	2.2522	2.3537	2.2043
2.85976	0.246542	2.43308	0.232227		209	2.6479	3.0291	2.875	3.1202	3.2047	3.0785	2.4952	2.5674	2.7176	2.862		209	2.389	2.4271	2.2173	2.6625	2.6402	2.8441	2.5417	2.1823	2.2363	2.1903
2.80719	0.235481	2.45136	0.253017		210	2.592	2.7103	3.2764	2.9122	3.0176	2.8442	2.5846	2.4793	2.7619	2.8934		210	2.4115	2.4102	2.198	2.7704	2.6951	2.7847	2.6471	2.1657	2.1647	2.2662
2.80532	0.266609	2.43159	0.216247		211	2.6572	2.781	2.9039	2.9535	3.2279	3.0595	2.4861	2.35	2.6889	2.9452		211	2.4098	2.3204	2.2614	2.5175	2.4356	2.8817	2.7099	2.2715	2.2924	2.2157
2.92732	0.464734	2.50283	0.201267		212	2.7096	2.7322	3.054	2.9488	3.0108	3.2436	2.7084	2.3243	2.5334	4.0081		212	2.6417	2.4585	2.3469	2.5726	2.7623	2.8112	2.5788	2.3242	2.2351	2.297
2.90154	0.461355	2.48286	0.273332		213	2.8197	2.6414	3.4013	2.7995	3.071	3.076	2.5733	2.2427	2.5598	3.8307		213	2.5109	2.4553	2.2821	2.7845	2.445	2.8731	2.8685	2.2229	2.2221	2.1642
2.91769	0.435143	2.37348	0.157071		214	2.7636	2.685	3.4205	3.0393	3.0113	3.3671	2.5344	2.3697	2.4059	3.5801		214	2.3691	2.3575	2.2926	2.4255	2.4845	2.6501	2.554	2.1749	2.2263	2.2003
2.95366	0.487039	2.38494	0.228376		215	2.5234	2.8043	3.4356	2.9261	3.2065	3.474	2.6099	2.3578	2.4499	3.7491		215	2.3896	2.4147	2.2239	2.509	2.4246	2.817	2.6364	2.1135	2.1366	2.1841
2.87395	0.27187	2.47286	0.239748		216	2.8144	2.9751	3.1179	2.8448	2.9769	3.294	2.3714	2.5585	2.7332	3.0533		216	2.4028	2.5528	2.3336	2.5538	2.3864	2.8829	2.8643	2.2233	2.2327	2.296
2.90437	0.302757	2.43374	0.205065		217	2.6247	3.0738	3.2255	2.8553	2.8749	3.2893	2.6303	2.3896	2.8322	3.2481		217	2.317	2.4351	2.4018	2.4816	2.5235	2.7159	2.7922	2.1438	2.2235	2.303
2.91505	0.361835	2.43782	0.119143		218	2.7693	2.8013	3.6045	2.6275	3.1263	3.1718	2.4561	2.6459	2.6693	3.2785		218	2.4539	2.4811	2.2459	2.507	2.5524	2.5939	2.5441	2.3568	2.2931	2.35
2.77965	0.268926	2.3608	0.124847		219	2.492	2.5943	3.0234	2.9373	2.8325	3.0313	2.5467	2.5679	2.5237	3.2474		219	2.3402	2.4963	2.3439	2.3716	2.3256	2.602	2.409	2.1422	2.3125	2.2647
2.8646	0.32654	2.4459	0.24151		220	2.887	2.5531	2.9631	2.7236	3.0357	3.0697	2.7858	2.4562	2.5908	3.581		220	2.3113	2.4245	2.5503	2.513	2.399	2.9196	2.7271	2.125	2.2699	2.2193
2.88893	0.301959	2.41681	0.132557		221	2.688	2.8796	2.9647	2.9306	2.8942	3.084	2.5942	2.4491	2.8435	3.5614		221	2.3655	2.3331	2.4517	2.4055	2.434	2.7049	2.5685	2.2797	2.2996	2.3256
2.93578	0.35493	2.38043	0.178028		222	2.7168	2.9604	3.4334	2.8222	2.8415	3.0719	2.6631	2.3009	3.0601	3.4875		222	2.5935	2.3686	2.2339	2.4376	2.2749	2.7085	2.5135	2.1633	2.2531	2.2574
2.80427	0.300145	2.44978	0.236409		223	2.686	2.9097	3.0624	2.6331	2.7611	2.8057	2.6118	2.3485	2.7562	3.4682		223	2.4743	2.4009	2.2493	2.5919	2.4518	2.8331	2.8219	2.1962	2.2639	2.2145
2.86322	0.297587	2.45448	0.260407		224	2.6921	2.9943	3.411	2.9329	2.8233	2.8867	2.5127	2.404	2.7891	3.1861		224	2.3875	2.5336	2.6742	2.3874	2.3565	2.9079	2.7525	2.0753	2.2711	2.1988
2.87946	0.260146	2.46085	0.226252		225	2.6762	2.8593	3.4872	2.989	2.9202	2.7677	2.6472	2.5919	2.8044	3.0515		225	2.3137	2.5372	2.3686	2.451	2.4621	2.8817	2.7844	2.1461	2.4042	2.2595
