# Supplementary material for: Hypoxia controls plasma membrane targeting of polarity proteins by dynamic turnover of PI4P and PI(4,5)P2
Source: eLife. 2022 Jun 9;11:e79582. doi: 10.7554/eLife.79582 (PMC9242647; doi:10.7554/eLife.79582)
Supplement: Figure 6—source data 2. [file elife-79582-fig6-data2.xlsx]

## Sheet: Figure 6A-PLC-PH
Figure 6 Souce Data 2
						1	2	3	4	5	6	7	8	9	10	11	12	13	14	15	16	17	18	19	20			1	2	3	4	5	6	7	8	9	10	11	12	13	14	15	16	17	18	19	20
WT		RNAi			WT																						RNAi
AVG	STDEV	AVG	STDEV
C2_PM/Cy	C2_PM/Cy	C2_PM/Cy	C2_PM/Cy		min	C2_PM/Cy	C2_PM/Cy	C2_PM/Cy	C2_PM/Cy	C2_PM/Cy	C2_PM/Cy	C2_PM/Cy	C2_PM/Cy	C2_PM/Cy	C2_PM/Cy	C2_PM/Cy	C2_PM/Cy	C2_PM/Cy	C2_PM/Cy	C2_PM/Cy	C2_PM/Cy	C2_PM/Cy	C2_PM/Cy	C2_PM/Cy	C2_PM/Cy		min	C2_PM/Cy	C2_PM/Cy	C2_PM/Cy	C2_PM/Cy	C2_PM/Cy	C2_PM/Cy	C2_PM/Cy	C2_PM/Cy	C2_PM/Cy	C2_PM/Cy	C2_PM/Cy	C2_PM/Cy	C2_PM/Cy	C2_PM/Cy	C2_PM/Cy	C2_PM/Cy	C2_PM/Cy	C2_PM/Cy	C2_PM/Cy	C2_PM/Cy
2.98498	0.209835	3.09159	0.23773		1	2.9586	3.2015	3.0061	2.9331	3.1673	3.0849	2.9911	2.7151	2.8649	2.535	2.7437	2.816	2.8001	3.0746	2.9922	3.3154	3.3493	2.8533	3.2228	3.0746		1	3.4433	3.0427	2.8331	2.9968	3.033	3.2716	2.6467	2.7975	3.0866	3.0477	3.2629	3.1253	3.601	3.1036	3.332	3.2446	3.1787	2.8818	3.1606	2.7423
2.58248	0.206385	2.61368	0.20725		2	2.4521	2.8651	2.3841	2.6539	2.7177	2.6767	2.5491	2.5175	2.3722	2.4335	2.4871	2.3569	2.1854	2.6327	2.4357	2.934	2.9594	2.5297	2.7383	2.7686		2	2.8458	2.51	2.8264	2.47	2.5458	2.575	2.2846	2.3308	2.5859	2.3779	2.5587	2.6965	3.0433	2.8231	2.7619	2.8954	2.4169	2.4685	2.7607	2.4965
2.59237	0.238649	2.66757	0.161771		3	2.2973	2.9637	2.3117	2.6233	2.6518	2.684	2.6867	2.3872	2.4791	2.3575	2.6063	2.4475	2.1589	2.6333	2.462	2.9467	2.7107	2.5642	2.7966	3.0789		3	3.05	2.6733	2.8837	2.6812	2.3915	2.6692	2.429	2.6486	2.734	2.4409	2.5161	2.8088	2.8156	2.7125	2.6243	2.7972	2.502	2.67	2.6258	2.6776
2.537	0.247239	2.56334	0.212146		4	2.424	2.6851	2.397	2.7401	2.2562	2.8449	2.6762	2.3033	2.3031	2.2936	2.2785	2.4298	2.0112	2.5886	2.6803	2.7551	2.691	2.6	2.8755	2.9064		4	3.1221	2.5719	2.8955	2.4767	2.3269	2.4672	2.2908	2.4898	2.496	2.3857	2.5623	2.6827	2.7465	2.33	2.6325	2.7239	2.4431	2.7544	2.5507	2.3181
2.81425	0.309407	2.87576	0.274756		5	2.8075	2.7541	2.6723	2.9525	2.4043	2.8866	2.719	2.3788	2.8674	2.6335	2.3744	2.4741	2.4028	3.0325	3.1323	3.0599	3.0111	3.0063	3.4429	3.2726		5	3.3393	2.9233	2.6227	2.6657	2.6296	2.8288	2.4617	2.8518	2.8668	2.7087	3.052	3.1296	3.2511	2.7612	3.3869	3.2663	2.6837	2.7884	2.7817	2.5158
2.47505	0.265728	2.52964	0.239909		6	2.5665	2.2282	2.3779	2.8801	2.2884	2.4718	2.2028	2.5342	2.3304	2.3825	1.994	2.5753	2.0013	2.7625	2.4714	2.5579	2.3731	2.782	2.8587	2.8619		6	2.5725	2.4547	2.7064	2.5528	2.1921	2.6406	2.707	2.6852	2.2869	2.1133	2.5503	2.5675	2.8082	2.385	2.9495	2.8762	2.4578	2.3766	2.6325	2.0777
2.61761	0.242621	2.5842	0.21182		7	2.6072	2.7142	2.3411	2.8614	2.4965	2.4836	2.4821	2.8071	2.4859	2.5257	2.2886	2.5586	2.0759	2.7973	2.8541	2.8383	2.8859	2.4033	2.8383	3.0071		7	2.5553	2.6997	2.6112	2.4508	2.6464	2.6883	2.4017	2.5491	2.7456	2.6024	2.9151	2.2956	2.7552	2.5379	2.5332	3.1707	2.4528	2.3314	2.3953	2.3464
2.68133	0.279558	2.60186	0.172213		8	2.988	2.8488	2.6711	3.2106	2.6251	2.4684	2.6567	2.4872	2.383	2.433	2.1278	2.5976	2.2527	2.6935	2.9141	2.68	3.0624	2.6568	3.0329	2.837		8	2.7442	2.8282	2.6792	2.5736	2.3937	2.5943	2.3403	2.5297	2.8244	2.3235	2.7625	2.5135	2.8031	2.4835	2.7255	2.9019	2.4612	2.4521	2.536	2.5669
2.64277	0.24057	2.64555	0.187597		9	2.8673	2.7786	2.5348	2.8066	2.8375	2.5967	2.6436	2.5537	2.438	2.3994	2.3437	2.422	2.2078	2.765	2.5294	2.6144	2.7567	2.53	3.2024	3.0278		9	2.727	2.9235	2.9144	2.4852	2.433	2.4994	2.4562	2.3899	2.6471	2.4742	2.9275	2.5113	2.8252	2.5986	2.86	2.8014	2.7699	2.409	2.5413	2.717
2.58353	0.254454	2.59993	0.204551		10	2.9388	2.6645	2.5117	2.8911	2.506	2.6253	2.7664	2.5358	2.6143	2.3191	2.1212	2.1776	2.0446	2.6096	2.7475	2.6169	2.6411	2.5685	2.8901	2.8804		10	2.7342	2.6624	2.6908	2.5559	2.3538	2.4875	2.4063	2.377	2.5494	2.2422	2.8645	2.5099	3.0379	2.5217	2.6135	2.4364	2.8068	2.4789	2.8591	2.8105
2.50929	0.206587	2.50066	0.192655		11	2.9172	2.6837	2.5097	2.5262	2.4964	2.2569	2.5085	2.605	2.218	2.6035	2.1921	2.3138	2.1241	2.487	2.5896	2.58	2.6875	2.4099	2.764	2.7127		11	2.5637	2.5703	2.7134	2.4545	2.2056	2.4122	2.4149	2.2794	2.3592	2.2398	2.5576	2.5922	2.9497	2.4438	2.6222	2.4178	2.6202	2.3006	2.8402	2.4559
2.60183	0.208706	2.48011	0.202727		12	2.8585	2.7043	2.4486	2.8321	2.544	2.3674	2.5459	2.7508	2.3552	2.6524	2.2002	2.3614	2.2367	2.7535	2.6935	2.6196	2.8957	2.7612	2.7346	2.7209		12	2.6077	2.5979	2.4675	2.2867	2.2702	2.4152	2.2112	2.2029	2.3535	2.4564	2.3153	2.6209	2.9072	2.3354	2.5728	2.5646	2.689	2.2704	2.8333	2.624
2.7634	0.266775	2.64109	0.159228		13	3.142	2.6456	2.6428	3.4222	2.5847	2.5755	2.7357	2.8452	2.6554	2.7687	2.2596	2.5237	2.3705	2.8842	2.8378	2.819	2.6616	2.806	3.0726	3.0152		13	2.7191	2.7498	2.5929	2.3953	2.7102	2.8309	2.4558	2.4635	2.4321	2.676	2.546	2.564	2.9572	2.6141	2.7235	2.5022	2.7978	2.5141	2.8972	2.68
2.54142	0.266001	2.38697	0.165259		14	2.8252	2.3451	2.5164	3.0359	2.4724	2.2278	2.5661	2.6549	2.6374	2.6623	2.1351	2.2889	1.9631	2.6009	2.7106	2.4869	2.323	2.8374	2.7384	2.8006		14	2.4481	2.4605	2.3693	2.3427	2.3119	2.5072	2.1802	2.1257	2.3956	2.1692	2.3818	2.2679	2.5883	2.3629	2.2335	2.5354	2.815	2.2578	2.5457	2.4407
2.69396	0.286037	2.4905	0.171247		15	2.9966	2.6594	2.6908	3.1351	2.6249	2.388	2.4671	2.5535	2.6591	3.0502	2.1983	2.5301	2.0354	3.0607	2.7859	2.727	2.7075	2.7808	2.83	2.9988		15	2.5513	2.4819	2.2972	2.5433	2.5134	2.6403	2.251	2.286	2.2893	2.4171	2.6322	2.4536	2.887	2.2373	2.4016	2.6071	2.6174	2.4777	2.7447	2.4805
2.60913	0.255934	2.41996	0.151623		16	2.8823	2.6816	2.5206	3.0675	2.5422	2.4051	2.5513	2.395	2.6031	2.6902	2.0686	2.4736	2.0843	2.6944	2.8741	2.7105	2.7137	2.607	2.6082	3.0093		16	2.5933	2.4161	2.2988	2.5312	2.4351	2.3286	2.1801	2.321	2.3403	2.3123	2.6655	2.4421	2.5343	2.212	2.6253	2.2388	2.5419	2.4317	2.6659	2.2848
2.39492	0.241892	2.16061	0.173568		17	2.6719	2.4016	2.3863	2.8424	2.3127	2.1123	2.4457	2.4201	2.1997	2.4255	1.9376	2.1503	2.14	2.9264	2.5378	2.5593	2.3483	2.3389	2.2377	2.5038		17	2.3881	2.3241	2.0643	2.2599	2.1959	2.0506	1.8413	1.9225	2.1446	1.9217	2.0749	2.3603	2.4649	2.0057	2.0661	2.0439	2.3373	2.2716	2.2808	2.1936
2.44636	0.231914	2.23725	0.141465		18	2.761	2.3864	2.6473	3.0282	2.2607	2.3208	2.3998	2.3604	2.244	2.3695	2.0886	2.2785	2.1402	2.7793	2.4078	2.5831	2.4496	2.3059	2.4942	2.6218		18	2.3528	2.3544	2.1275	2.2449	2.0047	2.0907	2.1812	2.1269	2.1298	2.1005	2.2361	2.5056	2.3766	2.1466	2.442	2.1197	2.2687	2.423	2.3756	2.1377
2.56984	0.20892	2.2856	0.145679		19	2.8889	2.5405	2.6166	2.9823	2.5585	2.3204	2.4795	2.5039	2.4798	2.5732	2.2079	2.3862	2.2608	2.6794	2.6823	2.6835	2.4527	2.4345	2.7938	2.8721		19	2.5074	2.3563	2.3111	2.2376	2.0716	2.0945	2.0299	2.1531	2.2119	2.1809	2.1326	2.3603	2.3928	2.3669	2.518	2.2333	2.391	2.2785	2.4277	2.4566
2.6433	0.220181	2.21503	0.125262		20	3.1169	2.693	2.6398	2.9799	2.4949	2.3355	2.7064	2.5738	2.5004	2.8062	2.1657	2.505	2.3589	2.8113	2.7667	2.8297	2.6596	2.6437	2.6085	2.6701		20	2.3356	2.393	2.1616	2.1797	2.076	2.1399	2.0221	2.0672	2.2389	2.1544	2.2287	2.0911	2.5523	2.2598	2.1105	2.3306	2.2691	2.2166	2.2313	2.2422
2.78078	0.231239	2.26451	0.128886		21	3.0525	2.9233	2.6736	3.2724	2.8695	2.5888	2.8017	2.8308	2.5426	2.9968	2.3032	2.5362	2.4607	2.9971	2.9415	2.836	2.614	2.6931	2.9073	2.7745		21	2.3799	2.4458	2.2267	2.2218	2.1622	2.1878	1.9815	2.0604	2.2573	2.1884	2.329	2.1251	2.4808	2.3963	2.2167	2.3397	2.3712	2.2726	2.3873	2.2597
2.55954	0.157653	2.11815	0.112958		22	2.608	2.5489	2.7172	2.8653	2.561	2.45	2.4858	2.5646	2.4943	2.5997	2.2499	2.3567	2.3973	2.8537	2.6685	2.6901	2.5328	2.3906	2.4799	2.6766		22	2.1793	2.2305	2.1448	2.2579	2.0852	2.1336	1.8995	1.9892	2.115	1.9878	2.1106	2.099	2.4103	2.0194	2.1409	2.2081	2.1761	2.0947	2.0793	2.0019
2.53094	0.19805	2.07574	0.0983739		23	2.5773	2.4999	2.6898	2.9916	2.4704	2.4241	2.4808	2.2878	2.3666	2.7797	2.2811	2.4698	2.257	2.9345	2.5455	2.5233	2.5904	2.3621	2.5089	2.5782		23	2.093	2.1812	2.0432	2.0981	2.145	2.1516	2.0759	1.9042	1.9373	1.9199	2.064	2.1197	2.3472	2.0178	2.1117	2.0585	2.0458	2.0908	2.1037	2.0061
2.44517	0.172229	1.96585	0.0696376		24	2.6539	2.461	2.6145	2.7647	2.4818	2.3991	2.3695	2.2491	2.2805	2.5201	2.1443	2.3999	2.2132	2.7951	2.4076	2.4745	2.407	2.2888	2.4273	2.5515		24	1.9936	2.0569	1.9515	1.9669	1.9434	2.0332	1.9667	1.8057	1.9515	1.8983	1.9548	2.0978	2.0701	1.9519	1.9858	1.8957	1.9078	1.9661	2.0306	1.8888
2.34312	0.139583	1.87302	0.0863449		25	2.6343	2.4127	2.4788	2.6292	2.2394	2.2325	2.2606	2.1583	2.4287	2.2679	2.1803	2.2069	2.2538	2.3743	2.2886	2.4244	2.2863	2.219	2.4195	2.4668		25	1.8942	1.9944	1.8377	1.9359	1.8534	1.9316	1.8258	1.7039	1.8256	1.859	1.8077	1.9886	2.0265	1.8126	2.02	1.8022	1.8145	1.7776	1.8844	1.8648
2.31057	0.160159	1.85363	0.082266		26	2.3871	2.2835	2.3973	2.6454	2.3958	2.1998	2.3101	2.2313	2.2516	2.0924	2.0588	2.1132	2.4053	2.5904	2.5138	2.3775	2.3266	2.1882	2.3161	2.1273		26	1.9215	1.9295	1.8056	1.8508	1.7966	1.86	1.8249	1.8752	1.9438	1.8497	1.8799	2.0048	2.0141	1.8769	1.7432	1.7121	1.7579	1.7465	1.8467	1.8329
2.22922	0.18876	1.77318	0.0752207		27	2.404	2.114	2.1007	2.686	2.1231	2.0524	2.2012	2.1381	2.3435	2.3015	1.8353	2.0749	2.4004	2.3455	2.5107	2.1886	2.0472	2.2467	2.2046	2.266		27	1.9116	1.8192	1.82	1.7923	1.7206	1.7371	1.8823	1.725	1.7651	1.7594	1.7264	1.8386	1.8416	1.8437	1.8349	1.6867	1.6966	1.6675	1.7654	1.6296
2.23021	0.143087	1.77394	0.0716898		28	2.399	2.2335	2.2444	2.5628	2.1618	2.0418	2.2291	2.2744	2.1958	2.2857	2.0579	1.9778	2.2098	2.3618	2.4009	2.0983	2.0986	2.1623	2.384	2.2244		28	1.7848	1.8775	1.7865	1.7497	1.7144	1.7991	1.707	1.81	1.7994	1.7218	1.7989	1.7771	1.9294	1.795	1.8575	1.7512	1.8059	1.7234	1.6852	1.605
2.16241	0.117933	1.74936	0.0682952		29	2.3082	2.1726	2.0946	2.3797	2.1888	2.1143	2.121	2.0782	2.1003	2.0913	1.9075	2.0755	2.0728	2.3631	2.2824	2.0335	2.2046	2.1593	2.2755	2.225		29	1.7246	1.9244	1.6846	1.6768	1.6988	1.7538	1.7122	1.7527	1.8224	1.7204	1.7078	1.8568	1.8027	1.8014	1.6639	1.7268	1.7062	1.7338	1.8251	1.692
2.12567	0.118518	1.7037	0.0565035		30	2.3331	2.1398	2.1332	2.325	2.0212	2.0632	2.0785	2.0054	2.0097	2.1375	1.9406	1.9382	2.16	2.2046	2.1708	2.1546	2.3401	2.0263	2.168	2.1637		30	1.6883	1.8092	1.6086	1.6535	1.6657	1.6817	1.6615	1.7263	1.7902	1.7022	1.6777	1.6885	1.7401	1.772	1.7484	1.7364	1.7258	1.623	1.7527	1.6221
2.08014	0.13571	1.67546	0.050082		31	2.1738	1.9952	2.3231	2.2194	2.0379	1.9314	2.0315	1.8429	1.9436	2.153	1.8567	1.9633	2.1318	2.1526	2.224	2.2298	2.051	1.9747	2.1602	2.2068		31	1.7713	1.7508	1.7019	1.6076	1.6381	1.6963	1.6219	1.7033	1.6501	1.6189	1.6402	1.7415	1.6724	1.6872	1.7374	1.6243	1.6173	1.6381	1.6811	1.7095
2.02639	0.1515	1.67348	0.0558246		32	2.2463	1.9251	2.2278	2.1949	1.9763	1.8119	1.9186	1.924	2.2062	1.9505	1.7956	1.8468	2.0835	2.1473	2.3002	2.0135	1.9849	1.8938	2.0684	2.0122		32	1.7347	1.7162	1.6015	1.61	1.5841	1.6652	1.6407	1.7135	1.7146	1.7032	1.6592	1.7143	1.7544	1.7575	1.7287	1.6314	1.6523	1.655	1.6588	1.5744
1.98722	0.139944	1.6515	0.0614677		33	2.1171	1.8271	2.0508	2.312	1.9473	1.8444	1.8145	1.8919	2.0093	2.0625	1.7468	1.8803	2.0656	2.1594	2.1023	2.1285	1.9078	1.8956	1.9959	1.9852		33	1.7092	1.7054	1.609	1.6179	1.6715	1.6679	1.5364	1.6908	1.674	1.623	1.6929	1.7776	1.6338	1.7539	1.6621	1.5753	1.616	1.5808	1.6535	1.5791
1.95325	0.113069	1.64535	0.0666995		34	2.0729	1.8606	1.9534	2.1438	1.8211	1.8543	1.898	1.8275	1.85	1.9399	1.7322	1.8622	2.0551	2.153	1.9812	2.0235	1.9978	1.988	2.0287	2.0219		34	1.6507	1.7761	1.6159	1.5002	1.6047	1.6248	1.6249	1.7098	1.6379	1.5993	1.6498	1.7964	1.7107	1.6844	1.6169	1.6118	1.6223	1.6174	1.6716	1.5815
1.92372	0.117438	1.6494	0.0511864		35	1.9735	1.8223	1.8326	2.2117	1.8413	1.8422	1.7743	1.8929	1.8151	1.8063	1.7602	1.8763	2.0171	1.9919	1.9739	1.9765	1.9764	1.944	2.0868	2.059		35	1.6477	1.6963	1.5733	1.5998	1.599	1.6755	1.6399	1.6853	1.654	1.6407	1.6024	1.8179	1.6242	1.6612	1.6479	1.661	1.6053	1.6246	1.6678	1.6642
1.88966	0.119453	1.61704	0.0630458		36	2.0687	1.8504	1.9167	2.0693	1.7467	1.8202	1.8917	1.7556	1.8945	1.8203	1.6943	1.6885	2.0521	1.8851	1.9213	1.854	1.8508	1.9316	2.0515	2.0299		36	1.5831	1.6568	1.5262	1.5587	1.5316	1.6277	1.5879	1.6884	1.6362	1.6018	1.579	1.6472	1.6847	1.7612	1.6824	1.6842	1.6272	1.5751	1.5498	1.5515
1.8919	0.102284	1.62708	0.044678		37	2.1004	1.8129	1.9175	2.0228	1.7787	1.7882	1.8122	1.887	1.9417	1.7819	1.7613	1.722	2.0579	1.9229	1.9043	1.952	1.9395	1.8563	1.9554	1.9232		37	1.6495	1.6725	1.6272	1.5936	1.5703	1.6365	1.5219	1.6276	1.659	1.6044	1.635	1.7007	1.6649	1.6913	1.6615	1.653	1.5687	1.5962	1.6034	1.6044
1.79807	0.0960613	1.64945	0.0532222		38	1.9939	1.726	1.8069	1.9355	1.7599	1.6872	1.7315	1.7241	1.726	1.7569	1.6079	1.7568	1.9351	1.8265	1.8862	1.9127	1.7965	1.7823	1.847	1.7624		38	1.6516	1.7115	1.6324	1.5653	1.6083	1.5972	1.5201	1.649	1.6854	1.6625	1.6221	1.6878	1.7324	1.6823	1.7148	1.6947	1.6861	1.6297	1.6077	1.6481
1.79093	0.100011	1.6039	0.0428642		39	1.9942	1.73	1.7675	1.912	1.7913	1.7301	1.8437	1.6255	1.7006	1.77	1.6134	1.6608	1.8392	1.9325	1.8667	1.8647	1.7605	1.8031	1.85	1.7629		39	1.6122	1.6245	1.5955	1.6035	1.5843	1.5963	1.5413	1.6203	1.5397	1.5479	1.5638	1.6804	1.6283	1.6586	1.5959	1.689	1.624	1.5556	1.6342	1.5827
1.80548	0.107906	1.62247	0.0722269		40	1.88	1.757	1.7354	2.0097	1.8196	1.7346	1.7839	1.7333	1.6986	1.7435	1.6167	1.6191	1.9293	1.8693	1.9504	1.8	1.7958	1.7924	1.9593	1.8817		40	1.5403	1.568	1.5592	1.5341	1.5591	1.5896	1.6119	1.6738	1.7186	1.6477	1.5959	1.7299	1.6368	1.7226	1.7053	1.7582	1.5938	1.6056	1.5363	1.5627
1.83546	0.094639	1.64187	0.0472989		41	1.9433	1.75	1.9171	1.9822	1.7701	1.7238	1.82	1.7639	1.7838	1.7337	1.7269	1.684	1.805	1.8484	1.9262	1.8683	1.8895	1.8882	2.0267	1.8581		41	1.665	1.6645	1.6413	1.5719	1.6257	1.6021	1.5943	1.6602	1.6541	1.6803	1.6342	1.7716	1.6669	1.6325	1.7014	1.6625	1.6439	1.5776	1.6026	1.5849
1.74836	0.0663166	1.60894	0.0319296		42	1.9175	1.6954	1.7331	1.815	1.7478	1.6405	1.7101	1.685	1.7616	1.6938	1.6585	1.7216	1.8297	1.784	1.707	1.7803	1.7209	1.752	1.7964	1.8171		42	1.604	1.6404	1.5502	1.5883	1.5613	1.6062	1.6381	1.64	1.6226	1.5698	1.6175	1.6845	1.6442	1.6318	1.5901	1.5896	1.6039	1.5931	1.5995	1.6038
1.76474	0.0690685	1.6527	0.0434128		43	1.8518	1.6948	1.8353	1.8091	1.7346	1.7337	1.7912	1.7499	1.7476	1.6544	1.6547	1.6114	1.7741	1.8097	1.8087	1.7962	1.7877	1.7533	1.8298	1.8668		43	1.6068	1.6891	1.5934	1.5579	1.6228	1.6858	1.707	1.6403	1.6532	1.7285	1.6296	1.6945	1.666	1.6999	1.6063	1.6874	1.651	1.6275	1.6402	1.6668
1.86748	0.0667802	1.8021	0.0455229		44	2.0219	1.8248	1.93	1.8397	1.799	1.8162	1.9231	1.7732	1.9242	1.7845	1.7994	1.8236	1.8592	1.8893	1.8347	1.8764	1.847	1.8787	1.9226	1.9821		44	1.764	1.8701	1.802	1.7248	1.7352	1.841	1.8047	1.8456	1.7806	1.7968	1.814	1.8473	1.7943	1.8684	1.841	1.8462	1.8093	1.7756	1.7566	1.7245
1.71385	0.0734295	1.60751	0.0674093		45	1.8011	1.6694	1.6998	1.7814	1.6916	1.6623	1.6977	1.7124	1.6909	1.631	1.5546	1.6197	1.697	1.8505	1.8331	1.7211	1.6773	1.7317	1.7684	1.786		45	1.5876	1.648	1.5458	1.5062	1.5036	1.5753	1.5387	1.6652	1.6366	1.674	1.5747	1.5937	1.6641	1.7684	1.6667	1.6468	1.6276	1.5634	1.6366	1.5271
1.70839	0.0787956	1.58936	0.0510563		46	1.8578	1.7129	1.8701	1.7834	1.568	1.63	1.7133	1.6788	1.7148	1.6364	1.588	1.6924	1.6571	1.6994	1.7661	1.6535	1.6769	1.7466	1.7564	1.7659		46	1.6079	1.5949	1.5244	1.5152	1.5922	1.5705	1.5453	1.5839	1.599	1.7017	1.53	1.5887	1.6635	1.6275	1.614	1.6173	1.6461	1.5808	1.591	1.4933
1.72232	0.0744464	1.60756	0.0360519		47	1.8452	1.6705	1.7846	1.8281	1.7229	1.654	1.6809	1.6529	1.6889	1.6589	1.629	1.6256	1.747	1.7396	1.6411	1.7444	1.6834	1.8158	1.7854	1.8481		47	1.635	1.6597	1.6181	1.5914	1.5715	1.6195	1.5737	1.6685	1.595	1.6557	1.6333	1.6513	1.6132	1.5651	1.6329	1.5824	1.5913	1.568	1.5794	1.5462
1.67956	0.079317	1.59391	0.0441179		48	1.8074	1.5741	1.6218	1.8218	1.7053	1.6486	1.662	1.5864	1.6574	1.5756	1.5382	1.6906	1.6819	1.6939	1.6316	1.7501	1.6761	1.7327	1.7509	1.7848		48	1.584	1.6215	1.5723	1.5321	1.5627	1.6032	1.5606	1.6398	1.5304	1.5768	1.5933	1.634	1.6132	1.6559	1.6579	1.5493	1.6212	1.5474	1.6738	1.5488
1.68242	0.0581595	1.60412	0.0586415		49	1.7059	1.6348	1.7653	1.767	1.6769	1.6215	1.6575	1.6671	1.7378	1.6476	1.6263	1.5789	1.7098	1.7648	1.7545	1.6875	1.602	1.7204	1.7009	1.6218		49	1.5733	1.6062	1.5337	1.5169	1.5884	1.5799	1.5234	1.5979	1.6167	1.5988	1.6056	1.7086	1.6777	1.749	1.6036	1.5627	1.6656	1.5829	1.6161	1.5753
1.6726	0.0588441	1.6116	0.0677416		50	1.7863	1.65	1.6802	1.6753	1.6245	1.5463	1.6338	1.6049	1.729	1.7275	1.6435	1.6439	1.6622	1.6506	1.6881	1.7132	1.5967	1.7163	1.7606	1.7192		50	1.628	1.623	1.5935	1.4612	1.6153	1.5647	1.5303	1.5706	1.5548	1.6709	1.644	1.6908	1.5759	1.773	1.6957	1.604	1.6508	1.6318	1.592	1.5617
1.67545	0.066461	1.60578	0.0521502		51	1.7722	1.6633	1.6796	1.692	1.6629	1.5756	1.6805	1.6267	1.6798	1.6444	1.5	1.715	1.6071	1.7564	1.7601	1.6632	1.6769	1.6643	1.7396	1.7495		51	1.6367	1.6681	1.6223	1.5052	1.595	1.5426	1.6024	1.6774	1.5877	1.6061	1.6206	1.7142	1.5592	1.662	1.6504	1.6076	1.5879	1.5606	1.555	1.5545
1.68163	0.0699919	1.61249	0.0566715		52	1.8083	1.6636	1.6502	1.6551	1.6083	1.6074	1.7465	1.7721	1.6384	1.6164	1.574	1.6444	1.6414	1.7434	1.7163	1.6258	1.6304	1.7561	1.7726	1.7619		52	1.6784	1.5921	1.5713	1.5313	1.5482	1.5685	1.6302	1.6397	1.6095	1.632	1.6035	1.7396	1.6357	1.7101	1.6811	1.5638	1.5986	1.6083	1.5551	1.5527
1.67934	0.0602984	1.62561	0.051786		53	1.7946	1.6694	1.6673	1.7171	1.6329	1.6374	1.6807	1.7251	1.6323	1.701	1.5657	1.6416	1.6619	1.6751	1.6507	1.6454	1.6021	1.7263	1.7925	1.7678		53	1.6636	1.7194	1.5765	1.5669	1.6282	1.6211	1.5918	1.6182	1.5777	1.6841	1.5934	1.7264	1.6413	1.7288	1.5973	1.5936	1.5979	1.587	1.6132	1.5858
1.67236	0.0550443	1.62076	0.0598214		54	1.7563	1.73	1.684	1.6895	1.6422	1.5784	1.6523	1.7568	1.6478	1.694	1.5731	1.7167	1.6475	1.6703	1.6905	1.6095	1.6001	1.6549	1.7386	1.7147		54	1.6387	1.7245	1.5664	1.5706	1.5765	1.6403	1.5878	1.6607	1.611	1.6953	1.5599	1.674	1.6048	1.7623	1.6283	1.6506	1.565	1.5417	1.583	1.5738
1.66105	0.0487912	1.60986	0.0571479		55	1.6937	1.6081	1.6194	1.7331	1.6733	1.6712	1.6761	1.573	1.7344	1.5999	1.6117	1.6351	1.601	1.6901	1.6261	1.6789	1.6988	1.7066	1.6626	1.728		55	1.5373	1.6518	1.671	1.4964	1.5531	1.6128	1.6181	1.6308	1.5705	1.6181	1.6713	1.6796	1.6274	1.6564	1.7077	1.5548	1.5164	1.6018	1.6274	1.5944
1.68221	0.050395	1.6221	0.0461904		56	1.8056	1.6615	1.7204	1.6555	1.6751	1.6634	1.6363	1.6244	1.6631	1.6653	1.6188	1.6854	1.649	1.7196	1.602	1.7269	1.7422	1.6741	1.7517	1.7038		56	1.6187	1.6134	1.6324	1.5879	1.5456	1.5991	1.5691	1.7251	1.6224	1.5984	1.5843	1.6616	1.6841	1.6418	1.647	1.6149	1.6946	1.5726	1.6538	1.5751
1.66792	0.0642037	1.60747	0.0417733		57	1.8151	1.6632	1.5724	1.6804	1.609	1.6382	1.6974	1.6948	1.6267	1.5883	1.6468	1.6562	1.6199	1.6672	1.6598	1.5996	1.7201	1.6806	1.7095	1.8133		57	1.6117	1.6151	1.5874	1.6079	1.5709	1.6578	1.5657	1.6921	1.6596	1.6075	1.5279	1.6205	1.5903	1.6482	1.6137	1.6391	1.6458	1.5608	1.5739	1.5535
1.65778	0.0487357	1.60195	0.0558501		58	1.755	1.6636	1.6643	1.6475	1.6628	1.6313	1.5883	1.5929	1.6613	1.7039	1.6141	1.6184	1.6261	1.7324	1.5815	1.6589	1.6491	1.6654	1.7186	1.7203		58	1.5558	1.6571	1.5505	1.5361	1.6031	1.658	1.5614	1.6459	1.5857	1.6144	1.5821	1.6456	1.5832	1.7407	1.615	1.632	1.5685	1.4879	1.6454	1.5706
1.65657	0.0617729	1.60057	0.0647455		59	1.6987	1.6213	1.6555	1.7569	1.6102	1.648	1.5803	1.5945	1.7285	1.5977	1.6024	1.6145	1.632	1.615	1.6442	1.7	1.6075	1.7392	1.6885	1.7964		59	1.6187	1.6854	1.5008	1.5787	1.5558	1.6297	1.5057	1.6194	1.5624	1.6162	1.5856	1.7297	1.5462	1.7107	1.5596	1.611	1.6194	1.5521	1.6864	1.5378
1.68129	0.0478908	1.62201	0.0561627		60	1.768	1.6279	1.6305	1.7186	1.6736	1.6407	1.6312	1.6831	1.6859	1.6514	1.6497	1.6009	1.6581	1.6766	1.6752	1.7671	1.7097	1.6907	1.7387	1.7483		60	1.6274	1.6708	1.5636	1.5652	1.5992	1.6119	1.5934	1.6051	1.5991	1.6123	1.5599	1.7601	1.6456	1.7223	1.6513	1.6512	1.5447	1.6382	1.6674	1.5514
1.66688	0.0546439	1.6056	0.0370065		61	1.7302	1.643	1.6571	1.7124	1.6108	1.6369	1.6562	1.6627	1.5747	1.6376	1.6757	1.5947	1.6258	1.7294	1.6044	1.6481	1.7387	1.7654	1.7438	1.69		61	1.5903	1.5687	1.5913	1.6149	1.5812	1.6001	1.6813	1.5687	1.576	1.5664	1.6398	1.6738	1.6119	1.6632	1.6138	1.5695	1.5802	1.6265	1.6306	1.5638
1.67259	0.0556804	1.61959	0.0460407		62	1.657	1.6172	1.7005	1.7215	1.6383	1.6436	1.6131	1.6577	1.6472	1.6712	1.6879	1.6274	1.5918	1.7363	1.6737	1.6883	1.6424	1.7988	1.6423	1.7956		62	1.6311	1.5884	1.6661	1.6538	1.5929	1.7368	1.5549	1.6005	1.6058	1.5665	1.6483	1.6684	1.5947	1.5569	1.6238	1.5964	1.681	1.6144	1.5798	1.6312
1.68839	0.0621735	1.6053	0.0425342		63	1.8123	1.6562	1.6681	1.7414	1.601	1.6844	1.6183	1.6698	1.7205	1.6357	1.6562	1.6211	1.631	1.6594	1.6321	1.733	1.7937	1.7117	1.7683	1.7535		63	1.6356	1.6792	1.6407	1.5698	1.6087	1.6353	1.5918	1.6233	1.5983	1.5719	1.6187	1.5683	1.5794	1.6958	1.6104	1.5669	1.625	1.6201	1.5288	1.538
1.6806	0.0476706	1.62921	0.0438713		64	1.719	1.6724	1.6817	1.6256	1.7703	1.6549	1.6009	1.638	1.6622	1.716	1.6365	1.7398	1.6102	1.6521	1.6866	1.719	1.7361	1.6581	1.691	1.7416		64	1.5967	1.6548	1.6776	1.6361	1.6633	1.6041	1.6902	1.6361	1.6012	1.6041	1.6027	1.7154	1.6267	1.6698	1.6203	1.6707	1.5786	1.6277	1.5579	1.5501
1.6879	0.0622523	1.64253	0.0515134		65	1.7479	1.6778	1.6898	1.7373	1.7065	1.5904	1.7177	1.7039	1.6674	1.629	1.7136	1.5669	1.5462	1.7428	1.6939	1.7079	1.7544	1.6676	1.7203	1.7767		65	1.6205	1.68	1.6256	1.6353	1.647	1.6405	1.6207	1.6191	1.6038	1.6406	1.6703	1.6891	1.714	1.7724	1.6681	1.6472	1.6563	1.5689	1.6015	1.5296
1.68986	0.0675384	1.6234	0.0529431		66	1.7475	1.7183	1.662	1.751	1.6164	1.6229	1.664	1.7917	1.669	1.5515	1.6777	1.6404	1.573	1.6726	1.7095	1.7428	1.7093	1.7343	1.8037	1.7396		66	1.6671	1.6475	1.6332	1.5832	1.6234	1.656	1.5573	1.6813	1.6044	1.5935	1.6179	1.6571	1.669	1.7585	1.5681	1.5928	1.66	1.5642	1.6005	1.5331
1.69538	0.0909286	1.62258	0.0586142		67	1.7982	1.8064	1.7231	1.6876	1.6953	1.6348	1.6811	1.7148	1.6269	1.6055	1.516	1.6254	1.5498	1.6773	1.7551	1.7304	1.7118	1.6768	1.7859	1.9055		67	1.6397	1.6391	1.569	1.6394	1.6151	1.5715	1.5971	1.7911	1.6567	1.5684	1.5795	1.642	1.6903	1.6952	1.6734	1.5842	1.5827	1.581	1.5814	1.5549
1.63285	0.0981584	1.61403	0.057234		68	1.7374	1.7134	1.5519	1.6987	1.6866	1.6215	1.5854	1.4919	1.5021	1.5149	1.4915	1.544	1.5434	1.6622	1.6214	1.7296	1.7211	1.7168	1.7149	1.8084		68	1.6077	1.647	1.6307	1.5811	1.7101	1.6809	1.5533	1.6933	1.5639	1.5903	1.6479	1.6457	1.6363	1.6264	1.6858	1.578	1.5548	1.573	1.5952	1.4791
1.5911	0.092054	1.58325	0.0658115		69	1.6909	1.6171	1.5638	1.6168	1.5388	1.5734	1.5189	1.541	1.5113	1.4726	1.472	1.5023	1.5256	1.6001	1.5608	1.6663	1.6533	1.64	1.7142	1.8428		69	1.5408	1.5813	1.536	1.5637	1.5708	1.5223	1.6342	1.6397	1.5488	1.6326	1.6474	1.6313	1.684	1.6913	1.6129	1.6029	1.477	1.5287	1.5802	1.439
1.55914	0.0688479	1.55574	0.0651552		70	1.6322	1.5064	1.5386	1.6159	1.5191	1.5448	1.4895	1.5192	1.5304	1.5069	1.479	1.4892	1.5402	1.5535	1.5255	1.5913	1.5327	1.6759	1.6777	1.7148		70	1.5295	1.6346	1.4898	1.5135	1.5702	1.4787	1.5715	1.6051	1.5242	1.6177	1.621	1.6696	1.6086	1.6307	1.6004	1.5103	1.53	1.4942	1.4745	1.4408
1.53176	0.0698607	1.54288	0.0793203		71	1.6297	1.5545	1.4642	1.5484	1.5189	1.4858	1.462	1.4532	1.5021	1.4474	1.4613	1.5142	1.5827	1.493	1.5142	1.531	1.5438	1.6608	1.5666	1.7014		71	1.5822	1.5971	1.5485	1.474	1.4891	1.5002	1.491	1.5823	1.4848	1.5714	1.5587	1.7327	1.5622	1.5907	1.7186	1.5008	1.5144	1.4611	1.4627	1.4351
1.53103	0.0603398	1.50853	0.059188		72	1.5748	1.6135	1.4748	1.524	1.5777	1.5362	1.4749	1.4771	1.5143	1.4495	1.4289	1.4904	1.5478	1.4712	1.5992	1.5132	1.5275	1.6259	1.5632	1.6364		72	1.5203	1.6087	1.5178	1.4911	1.4683	1.4616	1.467	1.5561	1.4237	1.5112	1.5164	1.595	1.5742	1.6107	1.5409	1.5034	1.4313	1.4478	1.5057	1.4193
1.51988	0.0481866	1.50913	0.0424846		73	1.5222	1.5339	1.5422	1.505	1.5115	1.4922	1.4979	1.5755	1.4863	1.4419	1.485	1.4559	1.4823	1.4723	1.5252	1.5335	1.5567	1.5344	1.6178	1.6258		73	1.5146	1.5558	1.4988	1.4715	1.4916	1.4777	1.5399	1.5239	1.49	1.5124	1.5025	1.5655	1.5283	1.5921	1.5639	1.509	1.4137	1.4575	1.5144	1.4596
1.51	0.0356554	1.48264	0.0486916		74	1.5231	1.5188	1.4545	1.5162	1.5145	1.4975	1.4986	1.4833	1.4484	1.4658	1.4936	1.4961	1.5257	1.5095	1.4941	1.536	1.5234	1.563	1.6039	1.534		74	1.5065	1.4973	1.4441	1.4404	1.4872	1.4726	1.5216	1.4547	1.4695	1.4749	1.456	1.5617	1.5958	1.5551	1.481	1.481	1.4124	1.4196	1.5023	1.4192
1.51907	0.0383863	1.47243	0.0447158		75	1.5165	1.5216	1.5148	1.5156	1.5076	1.5053	1.5166	1.4723	1.5046	1.505	1.4846	1.5321	1.6222	1.5676	1.4515	1.4863	1.5081	1.5816	1.5167	1.5508		75	1.4385	1.5188	1.4584	1.4363	1.5191	1.4783	1.4637	1.4351	1.4915	1.478	1.4679	1.5445	1.5304	1.5435	1.5096	1.4678	1.4372	1.4036	1.4365	1.3899
1.55025	0.058709	1.47369	0.0339218		76	1.5007	1.5015	1.5236	1.511	1.5495	1.5717	1.5904	1.5668	1.5916	1.6706	1.4845	1.5312	1.6273	1.6058	1.5084	1.5005	1.4443	1.6133	1.4985	1.6139		76	1.4426	1.5028	1.451	1.4587	1.477	1.436	1.5282	1.4625	1.4558	1.4433	1.4896	1.5008	1.4808	1.5198	1.5459	1.4933	1.4788	1.4507	1.4225	1.4337
1.58933	0.09113	1.46694	0.0316263		77	1.5211	1.4944	1.5506	1.5854	1.541	1.6458	1.6406	1.6646	1.5859	1.8675	1.5546	1.6487	1.6542	1.6667	1.5607	1.4781	1.482	1.5562	1.4868	1.6016		77	1.4549	1.4987	1.4815	1.4633	1.4868	1.4231	1.4475	1.473	1.4682	1.4457	1.4657	1.5387	1.4528	1.5071	1.5137	1.4178	1.4555	1.4731	1.4162	1.4554
1.65338	0.0972317	1.48132	0.034147		78	1.6386	1.5612	1.661	1.7438	1.6878	1.804	1.7046	1.8013	1.6842	1.7363	1.6513	1.7681	1.7247	1.6702	1.5233	1.528	1.4805	1.5623	1.6043	1.5321		78	1.474	1.546	1.5249	1.4353	1.4821	1.4469	1.4222	1.4804	1.4667	1.4922	1.4774	1.5273	1.4646	1.515	1.486	1.5138	1.4267	1.4716	1.4628	1.5104
1.70639	0.13491	1.47106	0.0381979		79	1.579	1.6317	1.6983	1.8592	1.8202	1.9742	1.8137	1.7258	1.8158	1.8117	1.6888	1.824	1.8327	1.7398	1.5775	1.5949	1.4881	1.5465	1.5387	1.5672		79	1.4525	1.4876	1.5088	1.417	1.5021	1.4757	1.3971	1.4923	1.4573	1.4539	1.4616	1.5374	1.4901	1.5324	1.4693	1.4271	1.4959	1.4073	1.4824	1.4734
1.75869	0.159346	1.46965	0.0336218		80	1.6568	1.6043	1.7975	1.9857	1.8719	1.9397	1.7942	1.7285	1.8626	1.9956	1.7327	1.945	1.8455	1.9039	1.7015	1.6815	1.505	1.544	1.5509	1.5271		80	1.4868	1.4529	1.4508	1.4107	1.5342	1.4557	1.4183	1.4784	1.4698	1.4449	1.4497	1.5216	1.4786	1.5174	1.5119	1.4709	1.4937	1.442	1.4423	1.4625
1.84182	0.179763	1.48138	0.0395127		81	1.7688	1.6508	1.8436	2.0837	1.9329	1.9579	2.0449	1.8896	1.8115	2.0546	1.8193	2.0754	1.9396	2.1239	1.6854	1.7074	1.6609	1.6145	1.5897	1.5821		81	1.4691	1.5508	1.492	1.4218	1.5054	1.4883	1.455	1.4754	1.4422	1.4547	1.4654	1.5048	1.5216	1.5578	1.5242	1.4922	1.4297	1.5041	1.4387	1.4344
1.91264	0.193865	1.48812	0.0280032		82	1.9542	1.7732	1.987	2.1382	2.0446	1.9967	2.1107	1.8897	1.9355	2.093	1.9405	2.0299	2.0841	2.2472	1.6305	1.8271	1.6301	1.6925	1.6517	1.5963		82	1.4937	1.5515	1.4278	1.5183	1.4946	1.4669	1.4748	1.5005	1.4856	1.4741	1.4648	1.454	1.4885	1.5243	1.4896	1.4596	1.5074	1.4779	1.4892	1.5192
1.98452	0.200865	1.50721	0.0382966		83	1.9818	1.833	2.0575	2.1898	1.8843	2.1665	2.2042	1.9377	2.1023	2.1401	2.0085	2.1483	2.0495	2.3988	1.7546	1.9089	1.683	1.9052	1.6169	1.7194		83	1.5006	1.5014	1.537	1.47	1.5024	1.4793	1.4632	1.5225	1.5461	1.4434	1.5325	1.5291	1.4627	1.5587	1.5875	1.5006	1.5155	1.4811	1.5498	1.4608
2.05377	0.202851	1.5329	0.0503825		84	2.0662	1.8993	2.2134	2.2998	1.9738	2.3959	2.1498	2.0001	2.1854	2.1569	1.98	2.2967	1.9236	2.341	1.8384	2.0077	1.9481	2.0457	1.6914	1.6622		84	1.4872	1.5137	1.5849	1.4541	1.5748	1.4947	1.5413	1.4782	1.4854	1.4765	1.5516	1.6488	1.5459	1.5408	1.5639	1.535	1.5329	1.4728	1.604	1.5716
2.11785	0.203004	1.53611	0.056526		85	2.1672	1.8887	2.1659	2.3253	2.3016	2.3665	2.3614	2.188	2.2593	2.2277	2.0831	2.1424	2.0178	2.3581	2.0393	2.0103	1.9334	2.1356	1.6307	1.7547		85	1.4612	1.5012	1.6377	1.4345	1.6656	1.5019	1.5201	1.4973	1.5909	1.505	1.5451	1.5567	1.518	1.4921	1.5794	1.5286	1.511	1.5174	1.5703	1.5882
2.13697	0.229941	1.58006	0.0579887		86	2.2952	1.9694	2.2578	2.4867	2.3624	2.3902	2.4067	2.2696	2.2503	2.1399	2.0869	2.0241	2.0988	2.3897	1.9838	1.995	1.7765	2.0994	1.6686	1.7884		86	1.5064	1.5607	1.6491	1.532	1.6684	1.6363	1.5025	1.5336	1.6389	1.5353	1.6038	1.5813	1.5413	1.5181	1.7111	1.5393	1.5589	1.5845	1.5854	1.6143
2.1917	0.225897	1.60709	0.103227		87	2.3634	2.0586	2.3766	2.5147	2.155	2.39	2.3006	2.3748	2.3173	2.2617	2.1397	1.9134	2.1349	2.5928	1.9976	2.1852	1.8349	2.2487	1.7565	1.9175		87	1.4629	1.5177	1.6752	1.5381	1.6618	1.6753	1.5922	1.5772	1.7788	1.4797	1.5822	1.7186	1.4798	1.5739	1.8537	1.556	1.537	1.5644	1.7032	1.6142
2.21997	0.192324	1.62997	0.118274		88	2.3066	2.2159	2.179	2.619	2.2157	2.4508	2.2715	2.4548	2.1564	2.1818	2.0825	2.2565	2.2658	2.4754	2.069	2.1131	1.9438	2.3363	1.8535	1.9519		88	1.5102	1.5687	1.6478	1.5634	1.6387	1.6136	1.6864	1.631	1.8083	1.5058	1.5944	1.6546	1.5358	1.4895	1.9321	1.6537	1.4796	1.612	1.8466	1.6273
2.25495	0.201189	1.69503	0.144663		89	2.293	2.1394	2.2609	2.7507	2.3459	2.3936	2.3772	2.2052	2.2197	2.332	2.2687	2.4134	2.2828	2.4758	2.2213	2.0826	2.0903	2.2254	1.7842	1.937		89	1.541	1.6057	1.6158	1.6454	1.6335	1.6389	1.7052	1.6178	1.9793	1.5847	1.6054	1.8875	1.6289	1.58	2.1022	1.6974	1.6145	1.7004	1.8223	1.6946
2.30064	0.195742	1.74462	0.153439		90	2.4769	2.2151	2.4424	2.6285	2.462	2.3932	2.3628	2.1668	2.4113	2.4526	2.1378	2.1441	2.2896	2.6649	2.2705	2.1141	2.1344	2.3092	1.9355	2.0011		90	1.5656	1.6805	1.8158	1.7392	1.7179	1.7075	1.7856	1.7011	1.8941	1.5686	1.6575	1.8832	1.6179	1.6484	2.2607	1.8304	1.6113	1.692	1.7716	1.7434
2.33175	0.222147	1.79071	0.188012		91	2.4149	2.3762	2.3193	2.782	2.3861	2.6089	2.4276	2.304	2.2225	2.4277	2.0457	2.1068	2.2875	2.8085	2.2496	2.1613	2.201	2.3912	1.9054	2.2088		91	1.5962	1.6593	1.9537	1.7627	1.7633	1.7208	2.0105	1.7492	1.8871	1.6572	1.7471	1.924	1.6117	1.5917	2.4066	1.8125	1.6375	1.6888	1.8187	1.8157
2.36181	0.169447	1.83779	0.185251		92	2.402	2.3414	2.3196	2.7545	2.3184	2.5162	2.538	2.4913	2.3383	2.3993	2.0843	2.3106	2.3651	2.6453	2.2407	2.2975	2.2838	2.3167	2.0278	2.2455		92	1.6413	1.7711	1.997	1.9522	1.7625	1.7944	1.9078	1.8567	1.8818	1.6671	1.7073	2.0932	1.6771	1.5676	2.3739	1.8463	1.6459	1.7675	1.8914	1.9538
2.37753	0.168712	1.89336	0.199263		93	2.2614	2.4688	2.4629	2.7494	2.4641	2.4886	2.4958	2.5019	2.2289	2.4007	2.1498	2.4303	2.3106	2.604	2.2188	2.371	2.0785	2.4594	2.1368	2.269		93	1.7173	1.7042	2.0137	2.197	1.8917	1.8798	1.8534	1.8437	1.9385	1.7404	1.7641	2.171	1.7916	1.6448	2.4496	1.7155	1.7155	1.8921	1.9857	1.9577
2.41969	0.180909	1.92992	0.182849		94	2.4	2.52	2.4075	2.742	2.4978	2.51	2.6534	2.4261	2.2637	2.3807	2.3842	2.2583	2.3384	2.7755	2.3777	2.3484	2.0849	2.6148	2.1659	2.2446		94	1.7757	1.8182	2.1338	2.1908	1.9364	1.9301	2.1748	1.8538	2.0971	1.7556	1.8625	1.9949	1.853	1.6504	2.3652	1.8057	1.6792	1.8969	1.9503	1.874
2.42652	0.230866	1.95797	0.183482		95	2.3624	2.3006	2.4091	2.7158	2.6954	2.5562	2.7901	2.3084	2.5851	2.3632	2.3224	2.0838	2.4629	2.6389	2.1932	2.2689	2.2007	2.8936	2.1222	2.2576		95	1.8078	1.959	2.2929	2.2048	1.9354	1.8872	2.0184	1.8612	2.1585	1.8573	1.7951	2.0844	1.8826	1.7064	2.4114	1.8254	1.7919	1.8839	1.9077	1.8882
2.36456	0.188297	1.99307	0.151156		96	2.4586	2.3771	2.5865	2.6744	2.4631	2.5271	2.4949	2.3104	2.3303	2.2687	2.1878	1.9831	2.3442	2.4804	2.4255	2.2052	2.2483	2.683	2.1183	2.1243		96	1.896	2.0544	2.152	2.2545	1.8772	1.9145	2.0633	1.8912	2.0907	1.8578	1.7926	2.2414	1.8973	1.751	2.2587	2.0712	1.8644	1.9661	2.004	1.9631
2.33096	0.173884	2.07131	0.17277		97	2.2546	2.4461	2.5161	2.5541	2.3734	2.5813	2.4808	2.3553	2.1621	2.5065	2.0957	2.085	2.4683	2.4635	2.1605	2.4678	2.1649	2.2398	2.1441	2.0994		97	1.9638	1.992	2.2197	2.3693	2.0808	2.0211	2.4589	1.9948	2.1506	1.9524	1.8204	1.9572	1.9838	1.8874	2.3446	2.1373	1.884	1.9349	2.1187	2.1545
2.33209	0.176703	2.06469	0.167649		98	2.0944	2.2842	2.6658	2.6015	2.2985	2.6396	2.3634	2.176	2.2731	2.515	2.1635	2.0394	2.3976	2.5199	2.25	2.3268	2.2601	2.3303	2.1866	2.2561		98	1.9069	2.0753	2.3705	2.3423	2.0688	2.025	2.1277	2.1516	2.2021	1.8048	1.8725	1.9917	2.0298	1.755	2.347	1.9925	1.9634	2.0522	2.1235	2.0912
2.39278	0.131178	2.10265	0.150668		99	2.3334	2.5746	2.4038	2.4575	2.3815	2.5543	2.3909	2.1455	2.3208	2.5767	2.1482	2.2641	2.4281	2.5769	2.3336	2.3312	2.2888	2.504	2.3312	2.5106		99	1.9824	2.1434	2.2818	2.2876	2.179	2.1647	2.1409	2.0459	2.0164	1.8562	1.9241	2.1152	2.1088	1.9097	2.3086	2.0026	1.9989	2.2019	2.4247	1.9602
2.38763	0.156506	2.14327	0.130065		100	2.412	2.4587	2.3485	2.5023	2.2243	2.54	2.5139	2.0716	2.3336	2.4315	2.1348	2.2603	2.1618	2.5038	2.5963	2.3799	2.2744	2.5488	2.4648	2.5914		100	2.0795	2.1902	2.2179	2.4335	2.1536	2.1311	2.1215	2.2568	2.1769	1.9956	1.9653	2.0749	2.1124	2.0124	2.4342	2.0676	1.9432	2.158	2.2042	2.1367
2.41518	0.133715	2.21778	0.122881		101	2.4617	2.3387	2.4257	2.7328	2.5113	2.5702	2.4094	2.3333	2.253	2.5052	2.3102	2.2069	2.197	2.5611	2.3799	2.4273	2.3219	2.5449	2.3521	2.461		101	2.1461	2.2737	2.3081	2.3725	2.2267	2.1894	2.2839	2.3496	2.1904	2.0438	2.1452	2.2617	2.2609	2.1078	2.4878	2.309	1.9622	2.0662	2.1786	2.192
2.42871	0.181223	2.18751	0.16423		102	2.4431	2.526	2.6335	2.6546	2.4259	2.5162	2.6339	2.3851	2.2259	2.5514	2.2418	2.1353	2.2787	2.5519	2.4257	2.3476	2.1508	2.7911	2.2296	2.4261		102	2.217	2.2855	2.2596	2.543	2.0187	2.1257	2.2714	2.181	2.2722	2.024	2.0697	2.2367	2.2893	1.8914	2.3771	2.4091	1.962	2.1982	2.1426	1.976
2.41222	0.157583	2.20036	0.0931422		103	2.487	2.4026	2.7354	2.545	2.3595	2.3922	2.6637	2.3211	2.3583	2.3566	2.2286	2.2605	2.1554	2.5789	2.3937	2.2157	2.277	2.6344	2.4882	2.3905		103	2.2187	2.3176	2.174	2.3019	2.041	2.1254	2.1417	2.1663	2.3846	2.0585	2.1724	2.2658	2.2984	2.1273	2.2877	2.2638	2.1471	2.2135	2.223	2.0784
2.411	0.180689	2.2088	0.103738		104	2.3906	2.4479	2.5247	2.6554	2.3811	2.3638	2.5369	1.982	2.5743	2.438	2.1878	2.4241	2.1628	2.5822	2.3054	2.2776	2.2538	2.7349	2.5176	2.4791		104	2.2145	2.271	2.4121	2.3686	2.2333	2.1784	2.1415	2.0472	2.2852	2.0885	2.1364	2.2659	2.3403	2.0444	2.2777	2.2746	2.1612	2.1686	2.1784	2.0883
2.38959	0.173093	2.24747	0.15543		105	2.6232	2.5045	2.6028	2.6625	2.3484	2.2815	2.4256	2.0973	2.3088	2.4725	2.1005	2.1942	2.2375	2.5538	2.5131	2.2576	2.2119	2.5117	2.518	2.3664		105	2.2413	2.0192	2.519	2.4701	2.1412	2.2688	2.182	2.3149	2.1412	2.0284	2.2215	2.358	2.4245	2.3422	2.4385	2.3268	2.1445	2.2594	2.159	1.9489
2.45174	0.189897	2.27559	0.152364		106	2.564	2.5212	2.7355	2.5423	2.4246	2.4582	2.5287	2.0994	2.3842	2.6602	2.2001	2.4259	2.3244	2.7029	2.3297	2.3737	2.192	2.4654	2.8236	2.2787		106	2.3949	2.1347	2.3243	2.4442	2.1382	2.1872	2.3719	2.32	2.2477	2.1533	2.0522	2.4097	2.3371	2.2998	2.6046	2.3693	2.2227	2.3383	2.24	1.9217
2.40835	0.183828	2.27601	0.118381		107	2.3627	2.4404	2.6399	2.6089	2.3194	2.3578	2.4448	2.0306	2.2532	2.5557	2.244	2.4399	2.3401	2.6101	2.3956	2.3952	2.1319	2.5868	2.7735	2.2365		107	2.5449	2.2856	2.2814	2.3277	2.118	2.2983	2.4315	2.343	2.4678	2.2065	2.233	2.2654	2.3021	2.1036	2.1267	2.2824	2.2028	2.3637	2.2141	2.1216
2.42481	0.158991	2.2865	0.136429		108	2.3164	2.5769	2.3311	2.7968	2.3512	2.4607	2.3477	2.1208	2.348	2.2724	2.5072	2.3364	2.3668	2.6628	2.506	2.3188	2.3492	2.3932	2.6776	2.4561		108	2.4395	2.5194	2.1704	2.4478	2.2411	2.2343	2.272	2.2723	2.4927	2.1683	2.2092	2.3915	2.4288	2.2106	2.2007	2.4235	2.1961	2.2765	2.0964	2.039
2.428	0.186166	2.32567	0.148131		109	2.558	2.3327	2.449	2.6258	2.5167	2.67	2.4531	2.0582	2.5112	2.3727	2.1709	2.2511	2.3552	2.8652	2.2701	2.2472	2.3899	2.4288	2.5891	2.445		109	2.6344	2.3897	2.3332	2.4632	2.2568	2.3027	2.5587	2.2726	2.4001	2.241	2.2295	2.2394	2.2349	2.2784	2.3134	2.5305	2.261	2.2767	2.3546	1.9426
2.42185	0.187071	2.31298	0.103268		110	2.6531	2.3933	2.4056	2.5504	2.6011	2.4937	2.4365	2.0197	2.4279	2.3504	2.0663	2.4959	2.4229	2.7078	2.5195	2.3033	2.1798	2.6995	2.2934	2.4168		110	2.5081	2.3913	2.3799	2.331	2.281	2.3546	2.3207	2.4168	2.4235	2.313	2.2627	2.2825	2.3268	2.2816	2.2581	2.4115	2.2273	2.1207	2.3127	2.0558
2.40426	0.158217	2.32405	0.138508		111	2.3763	2.5278	2.5331	2.3888	2.5627	2.3376	2.5798	2.1344	2.3666	2.2322	2.1833	2.2424	2.2778	2.526	2.6561	2.4304	2.185	2.575	2.3891	2.5807		111	2.6316	2.2996	2.2953	2.5397	2.1982	2.3953	2.272	2.4992	2.4434	2.2504	2.2658	2.2566	2.4356	2.4345	2.2766	2.3288	2.2457	2.1748	2.102	2.1358
2.4152	0.169482	2.33833	0.114487		112	2.5037	2.3799	2.7933	2.4541	2.597	2.3362	2.6247	2.2142	2.3594	2.3168	2.1226	2.2483	2.4619	2.3804	2.5227	2.3842	2.1206	2.3985	2.6013	2.4841		112	2.5321	2.3813	2.3676	2.5359	2.0905	2.3254	2.3945	2.3374	2.3451	2.3068	2.2847	2.3201	2.2395	2.4516	2.3181	2.3078	2.4614	2.3515	2.0907	2.3247
2.3914	0.160055	2.3433	0.143912		113	2.4941	2.4442	2.8204	2.4317	2.4301	2.3246	2.4595	2.1225	2.3097	2.4534	2.2259	2.0789	2.4002	2.4746	2.4167	2.4074	2.2196	2.4833	2.521	2.3101		113	2.5156	2.2656	2.4834	2.3562	2.1301	2.2406	2.4985	2.4237	2.1643	2.2798	2.3997	2.5645	2.4184	2.5626	2.1404	2.2624	2.3784	2.424	2.1779	2.1799
2.42873	0.183134	2.34038	0.132863		114	2.5954	2.5178	2.6483	2.3401	2.4016	2.4177	2.4581	2.4204	2.2972	2.8165	2.1586	2.1027	2.4284	2.4817	2.3331	2.3113	2.1848	2.684	2.6284	2.3484		114	2.481	2.44	2.4631	2.3705	2.3053	2.2245	2.5017	2.1814	2.2982	2.2741	2.4192	2.4499	2.1758	2.4125	2.3186	2.2695	2.2551	2.6411	2.1402	2.186
2.3865	0.177187	2.32865	0.143615		115	2.6041	2.4491	2.4654	2.3176	2.3743	2.358	2.372	2.0972	2.5816	2.6129	2.1286	2.0971	2.4883	2.2538	2.6014	2.2613	2.1234	2.5335	2.4828	2.5275		115	2.5335	2.2939	2.4555	2.4009	2.3527	2.2609	2.2219	2.1549	2.2614	2.3749	2.5624	2.2961	2.2908	2.2327	2.4194	2.4213	2.411	2.5119	2.1056	2.0113
