# Supplementary material for: Hypoxia controls plasma membrane targeting of polarity proteins by dynamic turnover of PI4P and PI(4,5)P2
Source: eLife. 2022 Jun 9;11:e79582. doi: 10.7554/eLife.79582 (PMC9242647; doi:10.7554/eLife.79582)
Supplement: Figure 6—source data 3. [file elife-79582-fig6-data3.xlsx]

## Sheet: Figure 6A-Lgl
Figure 6 Souce Data 3
						1	2	3	4	5	6	7	8	9	10	11	12	13	14	15	16	17	18	19	20			1	2	3	4	5	6	7	8	9	10	11	12	13	14	15	16	17	18	19	20
WT		RNAi			WT																						RNAi
AVG	STDEV	AVG	STDEV
C2_PM/Cy	C2_PM/Cy	C2_PM/Cy	C2_PM/Cy		min	C2_PM/Cy	C2_PM/Cy	C2_PM/Cy	C2_PM/Cy	C2_PM/Cy	C2_PM/Cy	C2_PM/Cy	C2_PM/Cy	C2_PM/Cy	C2_PM/Cy	C2_PM/Cy	C2_PM/Cy	C2_PM/Cy	C2_PM/Cy	C2_PM/Cy	C2_PM/Cy	C2_PM/Cy	C2_PM/Cy	C2_PM/Cy	C2_PM/Cy		min	C2_PM/Cy	C2_PM/Cy	C2_PM/Cy	C2_PM/Cy	C2_PM/Cy	C2_PM/Cy	C2_PM/Cy	C2_PM/Cy	C2_PM/Cy	C2_PM/Cy	C2_PM/Cy	C2_PM/Cy	C2_PM/Cy	C2_PM/Cy	C2_PM/Cy	C2_PM/Cy	C2_PM/Cy	C2_PM/Cy	C2_PM/Cy	C2_PM/Cy
3.8373	0.558451	3.28206	0.449349		1	3.3145	4.3101	4.5463	3.8032	4.0075	3.2612	4.7249	4.0938	2.9286	2.9619	4.6167	3.4363	4.3142	3.7385	4.112	2.9368	3.906	3.5556	4.0002	4.1776		1	3.2507	2.7694	3.0005	3.2882	3.471	2.8014	2.9659	3.4141	4.2391	3.6044	3.3855	3.0217	3.0698	2.8721	3.4049	3.3489	3.0893	4.5023	3.3564	2.7856
3.61508	0.502534	2.98972	0.438809		2	3.1853	3.7371	3.6786	3.6757	3.4893	3.3685	4.6064	3.3437	3.0862	3.0224	4.2572	3.2981	4.237	3.487	4.106	2.7335	3.9706	3.0154	4.2339	3.7696		2	2.4001	2.4859	2.6949	3.1561	3.0492	2.4508	2.6475	3.1852	3.9107	3.4235	2.7474	3.0125	3.0416	2.9223	3.2724	2.9812	2.7119	3.8559	3.4094	2.4359
3.56474	0.536309	2.84219	0.365994		3	3.1347	3.6657	4.0417	3.6714	3.1962	3.208	5.0695	3.4147	3.3509	3.08	3.6541	3.2556	3.9643	3.4937	4.0446	2.6665	3.4009	2.9362	4.1857	3.8605		3	2.3718	2.6843	2.7811	2.7676	2.7399	2.4674	2.82	3.0063	3.4923	2.9115	2.8932	2.911	2.752	2.8091	2.7474	2.7569	2.4728	3.9037	3.2133	2.3422
3.98282	0.585842	2.80556	0.344681		4	3.034	3.8268	4.1625	3.5393	4.0505	3.9883	5.0477	4.5094	3.9206	3.7031	4.357	4.161	4.2878	3.1317	4.8886	2.8278	3.8431	3.4797	4.546	4.3515		4	2.672	2.861	2.5206	2.777	2.9231	2.5989	2.4503	2.2644	3.2651	3.2295	2.8141	2.768	2.5445	2.5879	2.982	3.11	2.4752	3.7051	3.0338	2.5287
4.14343	0.518669	2.9398	0.316136		5	3.8077	4.1188	4.6319	4.0813	4.2456	3.9663	4.48	4.2917	3.9106	3.9317	4.5324	4.4143	4.3939	3.1352	4.6819	3.22	3.9026	3.509	4.2186	5.3951		5	3.5123	2.8736	2.3997	2.8112	3.0657	2.4125	2.923	2.7367	3.0292	3.3715	2.9948	3.1907	2.5589	2.7695	3.3247	2.9377	2.7621	3.4704	2.8531	2.7988
4.38814	0.606266	3.16717	0.348483		6	4.0201	4.2426	4.8102	4.2772	4.7784	4.0309	4.6292	4.7329	4.6787	3.6637	4.545	5.0771	4.2723	3.1209	4.7712	4.2554	4.5606	3.398	4.0416	5.8569		6	3.6681	2.8268	2.8286	3.3141	3.5119	2.7735	2.755	2.8486	3.15	3.4801	3.3539	3.4741	2.6128	2.8641	3.1841	2.9999	3.028	3.5811	3.7985	3.2903
4.27082	0.544891	3.43277	0.468227		7	3.6305	4.7861	4.8958	4.7554	4.5774	3.8219	4.5413	4.2615	4.2041	3.8053	3.8236	4.7148	3.809	3.3735	4.4321	3.7087	4.6263	3.546	4.8044	5.2986		7	4.5708	3.1268	2.6716	3.7374	3.6858	3.3167	2.6681	3.0959	3.8873	3.7101	3.2552	3.8063	3.0474	3.3585	3.5157	3.1418	3.0801	3.8335	3.9633	3.1831
4.2317	0.532016	3.66768	0.50499		8	3.9383	5.1466	4.9693	4.5969	4.5165	3.7572	4.313	3.9233	4.0532	3.7786	3.9568	4.7433	4.1345	3.6636	4.0954	3.1762	4.8962	3.5696	4.7585	4.647		8	4.6859	3.5656	2.8778	3.3473	3.6981	3.4793	2.8892	3.9201	3.8977	4.7366	3.5101	4.064	3.3512	3.5458	3.1148	3.4537	3.3161	3.9728	3.7092	4.2182
4.0793	0.472718	3.46923	0.396525		9	3.7435	5.1593	4.5406	4.3863	4.0517	3.8188	3.9251	3.8503	3.7784	3.5916	3.8825	4.3345	3.8627	3.4536	4.3614	3.8256	4.7455	3.2918	4.2716	4.7111		9	3.7889	2.8513	3.2742	3.2918	3.7931	3.26	3.0164	2.8609	3.9762	4.1307	3.2946	3.5315	3.1202	3.5727	3.5188	2.9983	3.4659	3.5989	4.0395	4.0006
4.02743	0.490679	3.39413	0.370121		10	3.8685	4.9425	4.3816	4.368	3.9727	3.5796	3.9749	3.8261	3.5143	3.8277	3.9709	4.4681	3.5714	3.1831	4.5574	3.9632	4.4178	3.1122	4.6535	4.3952		10	4.0671	2.7525	3.2036	3.6558	3.9315	3.3141	3.106	3.2532	3.8002	3.6379	3.1153	3.0232	2.9386	3.1709	3.5301	3.1946	3.5417	3.5456	3.99	3.1107
3.98937	0.489091	3.47452	0.419881		11	3.4945	5.1049	4.2044	4.654	3.9724	3.9515	3.7799	4.0226	4.1607	3.8391	4.1953	4.4996	3.4861	2.7888	4.0265	3.5532	3.9137	3.6268	4.2565	4.2568		11	3.8869	3.0966	3.1372	3.2856	3.5968	3.5338	2.9366	4.2037	3.8539	3.8389	3.147	3.1871	2.7071	3.3502	3.1484	3.5419	3.3131	3.8166	4.3165	3.5926
3.84939	0.408404	3.28854	0.267685		12	3.5277	4.7236	3.9794	4.3815	4.1882	3.6289	3.8534	3.8936	3.9379	3.8189	3.9298	4.4973	3.5789	2.9506	3.8414	3.3776	3.9652	3.6376	3.3645	3.9118		12	3.5531	3.101	2.7551	3.5683	3.419	2.8928	3.1891	3.4116	3.5074	3.7254	3.0982	3.0186	3.0514	3.218	3.3862	3.6232	3.1015	3.5964	3.408	3.1465
3.81675	0.366682	3.31893	0.308074		13	3.3874	4.3883	3.668	4.0394	4.2421	3.6457	3.598	4.0632	3.7569	3.5881	4.4253	4.1328	3.637	3.0407	3.9158	3.4504	3.8911	3.5427	3.6248	4.2974		13	3.8388	3.2746	3.0322	3.4646	3.5724	2.6462	2.9855	3.6512	3.5469	3.5776	3.4273	3.0806	3.3518	2.9174	3.3127	3.4282	2.8501	3.6073	3.3387	3.4744
3.81698	0.414417	3.14117	0.24274		14	2.9041	4.3251	4.0461	4.1103	3.7097	3.7036	3.971	3.6601	3.7852	3.8562	4.557	3.917	3.6499	3.3571	3.5372	3.4698	3.6399	3.3854	4.1364	4.6184		14	3.3208	3.1783	2.9917	3.1845	3.0839	2.7016	2.8281	3.6728	3.3499	3.1154	3.2558	2.9633	2.9196	2.8994	3.1249	3.1669	2.8619	3.3633	3.4621	3.3793
3.65998	0.418435	2.96337	0.306288		15	2.6701	3.8698	3.5383	3.9292	3.2143	3.6168	4.0938	3.5665	3.6637	3.6407	3.97	4.0477	3.663	2.9857	3.719	3.6558	3.598	3.5668	3.4944	4.6959		15	3.1097	3.154	2.3811	2.75	3.0275	2.8977	2.4477	2.5905	3.4028	3.2903	2.8674	2.947	2.8879	2.805	3.2934	3.0247	2.6622	3.082	3.5578	3.0887
3.53521	0.436984	2.8559	0.327267		16	2.9467	4.3348	3.457	3.7845	3.1546	3.8233	3.4318	3.682	3.2974	2.9393	3.9604	4.1872	3.4085	2.7392	3.6167	3.2172	3.4187	3.6446	3.4181	4.2422		16	2.88	3.2395	2.3216	3.0604	2.8694	2.5225	2.7655	2.3413	3.0722	2.9802	3.0143	2.763	2.7256	2.7297	3.2184	2.8168	2.3723	2.9983	3.6629	2.7641
3.31744	0.392238	2.5785	0.312078		17	2.7827	4.115	3.3803	3.3806	2.9583	3.3799	3.1457	3.3894	2.8523	2.8203	3.9648	3.5942	2.9868	2.7994	3.4379	3.1484	3.4986	3.305	3.467	3.9422		17	2.417	2.5285	2.234	2.8068	2.4165	2.2916	2.6128	2.5761	2.3718	2.4522	2.9699	2.6487	2.4715	2.2213	2.6586	2.6206	2.0982	3.17	3.347	2.657
3.04791	0.360645	2.29935	0.420556		18	2.6543	3.8169	3.4311	2.8622	2.7576	3.0716	2.7629	3.0134	2.6408	2.4142	3.3814	3.3979	2.9839	2.966	3.0639	3.0388	3.118	2.9104	2.9041	3.7688		18	2.101	2.052	1.9221	2.1125	1.9107	1.9494	2.5597	2.3492	2.232	2.1229	2.4947	2.4915	2.2614	1.856	2.1601	2.503	1.9056	3.0845	3.5621	2.3567
2.66503	0.366446	2.09412	0.353804		19	2.1362	3.5441	3.0534	2.647	2.4275	2.6274	2.7074	2.5052	2.4277	2.0768	2.7371	3.159	2.5187	2.4158	2.6209	2.7395	2.5845	2.3303	2.749	3.2931		19	1.7692	1.9281	1.7144	1.8307	1.8005	1.711	2.2438	2.4897	2.1796	1.9931	2.3563	2.509	2.3266	1.6383	1.8333	2.3368	1.8411	2.6106	2.8712	1.8991
2.40544	0.459651	2.04131	0.324571		20	1.8783	3.5126	2.8237	2.1883	2.1293	2.1303	2.5194	2.2028	2.1498	2.0176	2.5477	3.4857	2.3026	2.0834	2.0603	2.6495	2.1055	2.0032	2.6054	2.7134		20	1.738	1.7705	1.8787	1.7612	1.7145	1.7	2.0398	2.5866	2.0669	1.802	2.2056	2.3314	2.3862	1.6722	2.0115	2.4698	1.8683	2.4525	2.6104	1.7601
2.23393	0.457672	1.98549	0.293933		21	1.7658	3.3143	2.8427	2.0011	1.8535	1.9051	2.3353	2.1266	1.8215	1.8677	2.6284	3.0631	2.3246	1.8502	1.7576	2.2167	1.972	1.9288	2.5632	2.5403		21	1.6686	1.8109	1.8293	1.7518	1.6903	1.6837	2.1241	2.5933	2.1086	1.6695	1.9025	2.2555	2.2696	1.7215	1.9386	2.4117	1.8113	2.2688	2.4154	1.7848
2.18324	0.453718	1.98281	0.294544		22	1.8518	3.0163	2.7566	1.8764	1.7599	1.8903	2.168	2.1016	1.8178	1.7846	2.4732	3.3917	2.3067	1.8412	1.7845	2.2109	1.9166	1.8743	2.466	2.3763		22	1.7024	1.8113	1.7992	1.7483	1.6428	1.6184	2.3491	2.4881	2.1023	1.6623	1.9284	2.1561	2.3771	1.7437	2.0173	2.1138	1.7948	2.3906	2.4223	1.788
2.18095	0.46743	1.99698	0.301259		23	1.9046	3.0301	2.5311	1.8894	1.8316	1.8034	2.0977	2.0376	1.7397	1.8208	2.5902	3.3628	2.1166	1.7832	1.7566	2.3265	2.0889	1.7495	2.7913	2.3675		23	1.7235	1.8435	1.7486	1.7255	1.6943	1.6874	2.3475	2.5159	2.1126	1.6834	1.9937	2.2295	2.4646	1.7606	2.0255	2.3126	1.7163	2.2189	2.4086	1.7271
2.12935	0.39452	2.0208	0.31388		24	1.9736	2.8049	2.7501	1.8891	1.8204	1.8183	2.1433	2.0421	1.7493	1.7407	2.2748	2.8575	2.0209	1.8874	1.7568	2.3038	2.0022	1.6556	2.8273	2.2689		24	1.6737	1.7752	1.8191	1.7581	1.6225	1.7527	2.4454	2.5137	2.1935	1.6649	1.9592	2.3486	2.1823	1.7581	2.0367	2.3996	1.8933	2.3894	2.4694	1.7606
2.08015	0.393078	1.98863	0.324492		25	1.8735	2.7995	2.8412	1.8131	1.7924	1.8405	2.0659	1.959	1.73	1.7874	2.2023	2.7812	2.0188	1.7795	1.711	2.1471	1.8835	1.6648	2.7075	2.2048		25	1.5863	1.7776	1.7108	1.7661	1.5737	1.7035	2.3066	2.6229	2.2629	1.6509	1.9649	2.2246	2.3006	1.7856	1.8809	2.2276	1.8448	2.3949	2.4473	1.7402
1.97318	0.324717	1.97694	0.33911		26	1.7541	2.6268	2.4667	1.7945	1.7384	1.7489	2.0055	1.716	1.7231	1.7257	2.0453	2.2959	1.9	1.6643	1.7449	2.0351	1.8822	1.7131	2.7378	2.1454		26	1.6075	1.7649	1.6568	1.7874	1.5603	1.6419	2.5606	2.4574	2.1641	1.6258	2.0191	2.2621	2.4499	1.7211	1.8865	2.204	1.775	2.2207	2.4696	1.704
1.98504	0.322008	1.98723	0.340653		27	1.6956	2.5346	2.3697	1.7745	1.7123	1.6854	1.917	1.8874	1.6886	1.6831	2.2347	2.4346	1.9911	1.758	1.6977	2.3227	1.8555	1.6976	2.615	2.1456		27	1.6073	1.7333	1.6819	1.734	1.6374	1.7219	2.4048	2.6153	2.1874	1.6369	2.0588	2.4802	2.3887	1.7146	1.9014	2.2686	1.7922	2.0976	2.4206	1.6616
1.96734	0.333268	1.9427	0.301816		28	1.7453	2.6786	2.4302	1.7183	1.7364	1.6986	1.8908	1.7681	1.6793	1.6596	2.2602	2.5205	1.9551	1.6644	1.7154	2.2219	1.8741	1.6649	2.4291	2.036		28	1.672	1.6977	1.8024	1.7384	1.5937	1.6738	2.2067	2.6276	2.2698	1.6588	2.0661	2.189	2.2214	1.6733	1.8394	2.4212	1.7411	1.8617	2.1763	1.7236
1.95375	0.346765	1.95652	0.325003		29	1.7957	2.4996	2.6621	1.7205	1.7202	1.6743	1.7757	1.777	1.724	1.6624	2.0777	2.5857	1.8671	1.6636	1.67	2.2143	1.8035	1.6673	2.5109	2.0033		29	1.6348	1.7253	1.671	1.7798	1.6699	1.6797	2.5352	2.5289	2.1816	1.6578	2.1252	2.3894	2.3867	1.6455	1.8405	2.1172	1.6643	1.9679	2.2419	1.6879
1.94479	0.342451	1.99257	0.362835		30	1.8245	2.6618	2.5162	1.7212	1.7463	1.6845	1.8238	1.7146	1.7047	1.6457	2.1868	2.6554	1.7548	1.7054	1.6704	2.1951	1.7268	1.6968	2.2496	2.0113		30	1.6453	1.667	1.6676	1.7283	1.6639	1.6891	2.5085	2.4573	2.2799	1.6133	2.1218	2.5406	2.2922	1.6486	1.9814	2.2766	1.7957	1.9969	2.6403	1.6371
1.91303	0.319634	1.96422	0.350494		31	1.8996	2.4694	2.5845	1.6498	1.677	1.7427	1.8395	1.7031	1.6627	1.5942	2.0493	2.5605	1.7784	1.6734	1.6782	2.132	1.7073	1.6542	2.1898	2.015		31	1.6561	1.6604	1.7326	1.7272	1.6642	1.6879	2.2531	2.5911	2.3427	1.5675	2.0745	2.4448	2.1741	1.6485	1.8596	2.1676	1.7382	1.919	2.6884	1.687
1.91106	0.309864	1.99408	0.352634		32	1.8586	2.5946	2.5538	1.6924	1.6583	1.6551	1.7857	1.823	1.6241	1.6413	2.0627	2.3632	1.8361	1.7754	1.6828	2.1389	1.6681	1.6322	2.2118	1.9631		32	1.6274	1.7074	1.6978	1.7529	1.6899	1.7725	2.6024	2.43	2.2647	1.6286	2.04	2.5191	2.544	1.6487	1.8405	2.1352	1.7302	2.1046	2.4295	1.7163
1.96643	0.341824	2.01473	0.343597		33	1.7351	2.7251	2.6535	1.7519	1.762	1.6466	1.9774	1.8623	1.6857	1.7251	2.134	2.5016	1.7886	1.7615	1.6974	2.2143	1.7208	1.7003	2.3237	1.9617		33	1.6763	1.7124	1.6977	1.8419	1.6364	1.7195	2.3374	2.463	2.1204	1.711	2.1285	2.4905	2.3049	1.6978	2.0355	2.2662	1.812	2.1084	2.8164	1.7183
1.95879	0.355978	1.96711	0.319476		34	1.7745	2.4251	2.7698	1.6892	1.7365	1.685	1.9167	1.723	1.7109	1.6714	2.18	2.6174	1.8159	1.6673	1.7286	2.0082	1.7728	1.708	2.5548	2.0208		34	1.639	1.6143	1.6536	1.7796	1.6564	1.6988	2.4446	2.199	2.1117	1.6392	2.1451	2.5892	2.2374	1.7153	1.9336	2.2311	1.765	2.1634	2.4312	1.6947
2.00068	0.36341	2.01146	0.312785		35	1.8043	2.6493	2.5709	1.7046	1.8257	1.7382	1.8312	1.8132	1.8273	1.6921	2.1669	2.7864	1.85	1.672	1.6593	2.1757	1.8432	1.7682	2.5877	2.0474		35	1.7776	1.6382	1.7881	1.7628	1.7816	1.6858	2.269	2.1785	2.4629	1.7961	2.0519	2.5994	2.2144	1.713	2.0876	2.3684	1.814	2.0298	2.5422	1.6679
1.96251	0.331853	2.01832	0.368219		36	1.8124	2.595	2.5611	1.72	1.754	1.7733	1.8234	1.7464	1.6518	1.7307	2.1856	2.6243	1.8862	1.7305	1.6491	2.1303	1.8077	1.6988	2.3981	1.9715		36	1.6599	1.6071	1.6732	1.7088	1.7631	1.6903	2.4045	2.357	2.5398	1.724	2.2294	2.68	2.2743	1.7354	1.9366	2.2719	1.7792	2.0001	2.6499	1.6819
1.95603	0.309337	1.9726	0.339957		37	1.7989	2.4841	2.4692	1.7355	1.7024	1.7472	1.8671	1.7851	1.7109	1.7689	2.0913	2.588	1.8817	1.6781	1.7343	2.322	1.8195	1.6432	2.3584	1.9348		37	1.6469	1.7305	1.6995	1.7153	1.7483	1.6478	2.3977	2.3253	2.3403	1.6791	2.0309	2.335	2.1967	1.7228	1.8709	2.1462	1.7013	1.9888	2.8458	1.6829
1.98002	0.327977	1.97806	0.302427		38	1.8826	2.6851	2.3491	1.7734	1.7054	1.7272	1.8474	1.7926	1.7207	1.7325	2.162	2.5851	1.8885	1.7743	1.7284	2.1922	1.8228	1.631	2.5531	2.047		38	1.6462	1.7363	1.7557	1.7538	1.698	1.6885	2.4419	2.3468	2.2025	1.6251	2.0389	2.4433	1.9718	1.7002	2.0147	2.2263	1.7875	2.2131	2.5093	1.7613
1.97416	0.330221	1.92482	0.288263		39	1.8435	2.533	2.259	1.7716	1.7154	1.7381	1.8928	1.8162	1.7261	1.6731	2.1785	2.4879	1.8251	1.7547	1.6688	2.2557	1.7991	1.639	2.7393	2.1663		39	1.6587	1.7809	1.6864	1.6439	1.6338	1.6528	2.3326	2.3234	2.0657	1.6874	1.9706	2.4261	2.11	1.6155	2.1109	2.1745	1.7063	1.9308	2.3495	1.6367
1.9518	0.345635	1.9275	0.281914		40	1.6948	2.5589	2.4505	1.6933	1.7629	1.7596	1.9571	1.8025	1.698	1.7089	2.0938	2.5823	1.8163	1.6801	1.658	1.9932	1.7891	1.6507	2.7173	1.9686		40	1.6464	1.7952	1.6985	1.6867	1.6704	1.7139	2.1013	2.3163	2.1391	1.6201	2.029	2.4516	2.1178	1.615	1.9835	2.4321	1.7294	1.9214	2.2191	1.6633
1.96225	0.344781	1.93884	0.268614		41	1.8673	2.6106	2.5345	1.7023	1.7567	1.7281	1.877	1.756	1.6682	1.7004	2.1658	2.5207	1.8586	1.7493	1.6805	1.9563	1.7896	1.6653	2.6871	1.9708		41	1.7277	1.6684	1.7249	1.7129	1.618	1.7587	2.1665	2.2492	2.1857	1.5942	2.0398	2.396	2.1484	1.6321	2.1413	2.2136	1.7885	1.9822	2.3173	1.7114
1.92294	0.287951	1.90828	0.26732		42	1.7707	2.2702	2.4087	1.6852	1.7767	1.7597	1.9782	1.636	1.6359	1.7002	2.1313	2.586	1.9352	1.6942	1.6669	1.9688	1.8038	1.7191	2.3858	1.9462		42	1.6608	1.7515	1.7324	1.6911	1.63	1.715	2.226	2.198	1.9464	1.5798	1.9191	2.4557	2.0703	1.6227	2.1856	1.9888	1.7541	1.967	2.3778	1.6935
1.94014	0.302006	1.91905	0.286152		43	1.7216	2.3506	2.5602	1.7135	1.7173	1.7041	2.0183	1.673	1.6843	1.7358	2.2106	2.3051	1.868	1.723	1.6834	2.0689	1.8836	1.6674	2.5496	1.9646		43	1.7121	1.6411	1.6735	1.7159	1.6181	1.6652	2.3952	2.1582	2.1224	1.6179	1.8518	2.577	2.1698	1.6506	2.1119	2.1485	1.7466	1.9174	2.131	1.7569
1.93565	0.308124	1.92712	0.288435		44	1.6824	2.4961	2.3318	1.7503	1.6639	1.727	1.9297	1.8424	1.6574	1.693	2.1371	2.4509	1.8002	1.7679	1.658	1.9745	1.8689	1.6857	2.623	1.9729		44	1.65	1.8219	1.6875	1.7144	1.6586	1.6427	2.1374	2.2024	2.3105	1.6816	1.9127	2.6547	2.0887	1.634	2.0706	2.0974	1.7394	1.9629	2.2392	1.6359
1.94481	0.357529	1.86693	0.272939		45	1.7231	2.7905	2.3528	1.7171	1.6704	1.7286	1.9489	1.8023	1.6551	1.6934	2.097	2.5965	1.7908	1.6449	1.689	1.9823	1.7345	1.6671	2.5761	2.0359		45	1.6211	1.6849	1.6662	1.6366	1.63	1.6123	1.8746	1.8784	2.2007	1.7513	1.8622	2.5888	2.0009	1.6337	2.1881	2.0132	1.7018	1.9752	2.2425	1.5762
1.9776	0.383436	1.83751	0.221411		46	1.7588	2.6216	2.5209	1.7022	1.7343	1.7142	2.0133	1.8078	1.6995	1.7334	2.1298	2.9399	1.9076	1.6235	1.6909	1.9859	1.767	1.6407	2.5643	1.9963		46	1.672	1.7606	1.5995	1.7076	1.625	1.627	1.9034	1.8019	2.1497	1.6383	1.9029	2.3763	1.9911	1.6094	2.1301	1.9262	1.6874	1.8691	2.1104	1.6623
1.9207	0.314083	1.80804	0.20826		47	1.8368	2.3271	2.343	1.6809	1.7429	1.6845	1.9422	1.7195	1.6636	1.6922	2.2217	2.7341	1.8805	1.6669	1.6537	1.8774	1.7305	1.6555	2.3887	1.9724		47	1.6288	1.7166	1.6121	1.6656	1.5947	1.6906	1.9061	1.9689	2.0978	1.6545	1.9881	2.3697	1.8834	1.6196	1.9094	1.913	1.615	1.7334	1.9827	1.6109
1.86447	0.277562	1.86365	0.265439		48	1.6926	2.2399	2.001	1.7717	1.5992	1.6462	1.9971	1.6576	1.6789	1.6019	2.1179	2.0146	1.901	1.7076	1.6459	1.7687	1.9866	1.7157	2.744	1.8013		48	1.7812	1.7011	1.6685	1.7073	1.6518	1.5889	2.0294	2.1259	2.2646	1.6411	2.1486	2.5249	2.1264	1.6158	1.8439	1.9933	1.6607	1.6994	1.9174	1.5828
1.85427	0.247444	1.80646	0.259366		49	1.7608	2.326	1.9638	1.7639	1.6275	1.6542	1.9646	1.774	1.71	1.6538	2.0886	2.4738	1.7635	1.6467	1.7537	1.7726	1.6549	1.6999	2.2592	1.7739		49	1.6212	1.6634	1.6337	1.6435	1.6478	1.5494	1.9271	1.7779	2.424	1.6352	2.1633	2.3418	1.984	1.554	1.904	1.8474	1.6109	1.7331	1.9275	1.54
1.88501	0.246999	1.80677	0.229327		50	1.8024	2.4446	2.0323	1.8344	1.7345	1.7404	1.8289	1.7481	1.6856	1.6919	2.0339	2.4904	1.8215	1.6847	1.696	2.0314	1.7654	1.6685	2.2087	1.7566		50	1.6638	1.694	1.675	1.6385	1.6231	1.5864	1.8516	1.8282	2.3325	1.5772	2.1234	2.2332	1.9384	1.6352	1.8598	1.8662	1.5873	1.767	2.073	1.5816
1.88547	0.246951	1.7622	0.19372		51	1.731	2.4955	2.0731	1.9725	1.9796	1.7964	1.7182	1.6848	1.6821	1.6755	1.8896	2.3484	1.825	1.6785	1.7654	2.1946	1.7059	1.6219	2.1253	1.7461		51	1.6132	1.6267	1.6633	1.6331	1.5999	1.6201	1.9551	1.8549	2.2175	1.6057	2.0378	2.1214	1.9058	1.6014	1.7488	1.7696	1.573	1.705	1.8014	1.5902
1.9128	0.259081	1.74535	0.174643		52	1.673	2.4813	2.0057	2.0833	2.0481	2.1117	1.6968	1.7485	1.5978	1.6579	1.848	2.3372	1.7601	1.833	1.7733	2.315	1.6727	1.6253	2.0731	1.9142		52	1.5458	1.618	1.6074	1.652	1.5856	1.5731	1.8049	1.8308	2.0895	1.5862	1.883	2.1041	1.9632	1.6555	1.6926	1.7924	1.5939	1.7667	1.9421	1.6203
2.02249	0.392138	1.75873	0.166587		53	1.7477	2.6263	2.2604	2.3478	2.5399	2.3362	1.7139	1.6519	1.6751	1.5827	1.783	2.8369	1.8287	1.8975	1.949	2.5726	1.6289	1.6445	1.9518	1.875		53	1.5596	1.6268	1.5969	1.7046	1.5529	1.6747	1.7293	1.6978	1.9289	1.6118	1.9401	2.0541	1.9264	1.758	1.7774	1.8947	1.6261	1.8353	2.0974	1.5818
2.07298	0.403311	1.71606	0.155388		54	1.8744	2.728	2.268	2.7017	2.5531	2.6166	1.8064	1.7893	1.6193	1.639	1.6911	2.3464	1.8796	2.2556	1.9696	2.5875	1.5929	1.5847	1.8002	2.1562		54	1.552	1.5811	1.6282	1.6323	1.572	1.5545	1.9416	1.7949	1.9233	1.5445	1.7995	2.0025	1.8831	1.5522	1.6198	1.8373	1.6271	1.8057	1.873	1.5966
2.13366	0.4218	1.74473	0.209562		55	2.1688	2.7322	2.2788	2.6963	2.5948	2.8439	1.9756	2.0249	1.6676	1.5653	1.6679	2.1565	1.9195	2.4985	2.078	2.5616	1.5383	1.6017	1.7726	2.3303		55	1.5295	1.6165	1.5296	1.5853	1.5759	1.568	1.8343	2.0466	2.1625	1.5796	1.8211	1.9185	2.0227	1.5786	1.5942	1.8257	1.6676	1.721	2.1201	1.5973
2.29268	0.520502	1.74881	0.203505		56	2.1844	3.0141	2.4718	3.0601	3.0132	3.0365	1.9574	2.3592	1.7809	1.6375	1.7627	2.3979	1.9189	2.5319	2.2871	2.914	1.6069	1.6129	1.7873	2.5188		56	1.5502	1.6003	1.5328	1.5378	1.6468	1.5893	1.7888	1.8933	2.1153	1.5558	2.0184	1.8666	2.1344	1.5856	1.6432	1.8213	1.5933	1.8674	2.0156	1.62
2.39616	0.562515	1.75551	0.211513		57	2.2454	3.0167	2.5872	3.1474	3.0046	3.307	2.1476	2.7148	1.9939	1.6462	1.8275	2.4352	2.124	3.0751	2.4455	2.8048	1.5729	1.5709	1.6899	2.5665		57	1.5469	1.63	1.5623	1.553	1.5328	1.5584	1.709	1.7966	2.1953	1.5813	1.9828	1.9345	2.1742	1.5708	1.6973	1.9245	1.6816	1.8111	1.9927	1.6751
2.52641	0.616411	1.81202	0.214871		58	2.6054	3.2785	2.4322	3.0829	3.0483	3.4743	2.3211	3.144	2.0661	1.6905	1.9572	2.6124	2.1601	3.3429	2.6636	2.9649	1.6213	1.5808	1.6913	2.7903		58	1.6463	1.7412	1.6468	1.5747	1.6571	1.5521	1.7666	1.8565	2.2713	1.561	1.9294	2.0358	2.2755	1.6953	1.8581	1.9057	1.6223	1.9009	2.0085	1.7353
2.56798	0.626953	1.82179	0.251943		59	2.655	3.301	2.6087	3.3496	3.0704	3.3584	2.2887	2.978	2.0854	1.7333	2.0718	2.8619	2.0258	3.2445	2.5809	3.2219	1.561	1.642	1.7327	2.9885		59	1.6031	1.7083	1.6415	1.5655	1.6806	1.5594	1.9286	1.826	2.2419	1.5652	2.0135	1.9328	2.437	1.7415	1.6741	1.7249	1.6003	2.064	2.1775	1.7501
2.63359	0.611301	1.86694	0.269237		60	2.8613	3.4754	2.6741	3.4727	3.2973	3.106	2.7981	2.8716	2.3205	1.7535	2.2441	2.5948	2.1628	3.4477	2.6327	3.1188	1.6639	1.6526	1.7319	2.7921		60	1.5691	1.8378	1.6991	1.5519	1.6911	1.6416	1.9576	1.9063	2.2638	1.5739	2.1406	1.8911	2.5782	1.7251	1.6372	1.8477	1.7086	1.9605	2.2325	1.925
2.68119	0.591907	1.89963	0.247788		61	2.8661	3.2738	2.6574	3.4391	3.2848	3.2326	2.9899	3.1099	2.2744	1.8898	2.281	2.8179	2.1902	3.4755	2.6208	3.06	1.7559	1.7528	1.698	2.9539		61	1.6402	1.8819	1.67	1.5802	1.8015	1.7142	1.9201	2.0015	2.2086	1.5849	2.1298	2.1321	2.5458	1.877	1.6825	1.8787	1.6869	2.0411	2.1373	1.8782
2.77402	0.540185	1.93086	0.23916		62	2.8801	3.1133	2.8354	3.312	3.4484	3.2815	3.0383	3.1456	2.5991	2.1933	2.2717	2.835	2.272	3.5187	2.7852	3.3085	1.9658	1.8305	1.8321	3.0138		62	1.6707	1.9242	1.6916	1.5939	1.7127	1.7052	2.1122	1.9319	2.3301	1.6964	2.1398	2.1803	2.371	2.0785	1.7033	1.8784	1.6823	2.0729	2.1226	2.0193
2.89102	0.463018	2.04272	0.306992		63	2.9212	3.388	2.9549	3.4313	3.1468	3.2986	3.3316	3.1247	2.6498	2.4306	2.5755	2.6977	2.5631	3.4566	3.2677	3.2972	2.0438	2.1935	2.0581	2.9897		63	1.676	1.9317	1.8477	1.5873	1.6759	1.9362	2.2792	1.9067	2.264	1.692	2.4357	2.7346	2.3792	2.2686	1.8336	2.0056	1.7817	2.2726	2.1071	2.2389
2.99228	0.391019	2.10701	0.331498		64	3.1178	3.359	2.9282	3.6969	3.334	3.272	3.3599	3.1204	2.7414	2.4226	3.019	2.8264	2.9196	3.53	3.0768	2.9242	2.3641	2.341	2.3956	3.0967		64	1.7695	2.081	1.8891	1.6596	1.7289	1.9425	2.0433	1.9109	2.3496	1.8747	2.5914	2.5607	2.6655	2.5035	1.808	1.9599	1.7183	2.2674	2.3047	2.5117
2.99341	0.390054	2.1616	0.302322		65	2.8117	3.943	3.1292	3.4856	3.1643	3.2314	3.277	2.9895	2.699	2.5701	2.8154	2.9131	2.7594	3.4722	3.1749	2.7316	2.5732	2.4558	2.4332	3.2385		65	1.7012	2.1394	1.8459	1.7944	1.9132	1.9399	2.1097	2.12	2.3233	1.9663	2.4467	2.4827	2.8343	2.5328	1.9921	2.0859	1.8181	2.4066	2.2929	2.4866
3.03425	0.323444	2.28445	0.299477		66	2.7863	3.6144	2.9572	3.3899	3.4687	3.2255	3.2807	2.9611	2.7833	2.8436	3.1265	2.9317	2.5911	3.404	3.1746	3.0176	2.623	2.58	2.57	3.3558		66	1.9196	2.38	1.9655	1.9762	1.9257	2.0141	2.2922	2.0478	2.6065	2.0507	2.4993	2.6906	2.909	2.4828	2.1052	2.1537	2.1478	2.7205	2.2933	2.5085
3.14112	0.33457	2.32228	0.286645		67	2.6816	3.771	3.2195	3.6038	3.2307	3.2571	3.2229	3.2003	3.2093	2.7526	3.1762	3.0764	2.7573	3.5558	3.2528	3.1898	2.6235	2.8525	2.6384	3.5509		67	2.1176	2.4347	2.0705	1.9543	1.948	1.9194	2.2122	2.2097	2.761	2.15	2.5004	2.7902	2.7486	2.4964	2.3672	2.4018	2.0519	2.7616	2.1834	2.3668
3.16488	0.340598	2.44823	0.268408		68	3.0993	3.7298	2.9808	3.3561	2.9288	2.9989	3.5869	3.6151	3.0259	2.841	3.1784	3.0995	2.8252	3.5321	3.1756	2.827	2.8027	3.0494	2.7487	3.8965		68	2.051	2.6193	2.3424	2.158	2.0427	2.1667	2.4	2.0889	2.8051	2.1738	2.8066	2.8567	2.759	2.6065	2.412	2.5803	2.3417	2.5631	2.6453	2.5455
3.22238	0.335913	2.53506	0.280784		69	3.1126	3.9016	3.3166	3.6298	3.0808	3.1344	3.5821	3.3908	3.3003	2.7576	3.1386	3.0753	3.0023	3.5111	3.2114	2.6318	2.811	3.07	2.9906	3.799		69	2.33	2.5186	2.3555	2.2189	2.0624	2.1454	2.4186	2.1248	3.0588	2.3945	3.0148	2.7219	2.7093	2.7014	2.6059	2.5466	2.6394	2.77	2.8138	2.5505
3.16028	0.309283	2.60923	0.23307		70	2.7677	4.0228	3.1	3.3134	2.9319	3.3295	3.2808	3.0924	3.3738	2.8454	3.3089	2.9496	3.1738	3.5726	2.9381	2.9266	2.8152	3.0432	2.919	3.5009		70	2.6845	2.4657	2.3259	2.391	2.1636	2.2969	2.5715	2.4746	2.8401	2.6429	2.9244	3.0476	2.7733	2.6115	2.8001	2.4798	2.7563	2.7447	2.814	2.3762
3.18792	0.323247	2.65615	0.314596		71	2.7204	4.1167	3.1879	3.2985	3.2996	3.2142	3.2747	3.1041	3.2765	3.1163	2.9385	3.2171	2.8004	3.5135	3.0163	3.1563	2.7099	3.2153	2.9369	3.6453		71	2.5715	2.3332	2.3348	2.5528	2.2173	2.3864	2.3443	2.2471	3.0554	2.7996	2.8971	3.2144	2.6493	2.6194	3.1082	2.5483	2.4626	2.9434	3.1425	2.6954
3.28145	0.344082	2.70093	0.331298		72	2.9183	3.9989	3.5848	3.1957	3.6037	3.1066	3.3069	3.1346	3.2357	2.9628	3.1023	3.1447	2.7395	3.5107	3.1974	3.6691	2.6635	3.5814	3.2281	3.7442		72	2.5966	2.4301	2.2239	2.6002	2.2137	2.2857	2.5038	2.5081	3.2483	2.8371	3.0983	3.1617	2.6884	2.5936	3.0847	2.8293	2.4358	2.8867	3.2374	2.5553
3.22721	0.280323	2.70883	0.319413		73	2.8864	3.8802	3.5722	3.4758	3.183	3.1363	3.1668	3.204	3.183	2.9685	3.0486	3.0108	2.8663	3.2562	3.0722	3.4107	2.8152	3.451	3.2878	3.6692		73	2.9361	2.8241	2.2589	2.4858	2.3549	2.1217	2.4217	2.3087	3.0804	2.7171	2.9337	3.2709	3	2.6594	2.8468	2.6913	2.6296	3.0867	3.0389	2.5098
3.19225	0.255929	2.75474	0.345339		74	2.9811	3.8385	3.4118	3.3543	3.2473	3.2877	2.8901	3.0136	3.2968	2.973	3.139	2.8631	3.0239	3.3109	3.0321	3.137	2.8544	3.477	3.1544	3.559		74	2.8594	2.6703	2.4	2.5821	2.4153	2.1518	2.3512	2.1867	3.1091	2.8782	3.1913	3.2579	3.1284	2.6694	2.658	2.9318	2.5911	3.1078	3.2067	2.7483
3.25649	0.325244	2.80678	0.326056		75	2.9052	4.1046	3.4946	3.3189	3.2978	3.3621	3.1475	2.8899	3.2618	3.1375	3.3022	3.2329	2.7881	3.3942	3.0242	3.2932	2.8423	3.9227	3.2954	3.1148		75	2.6079	2.9597	2.5704	2.6418	2.4319	2.1929	2.2098	2.5526	3.0424	2.8099	3.2736	3.186	3.2655	2.9124	2.5925	3.2194	2.9956	3.0005	2.8888	2.782
3.21612	0.365124	2.72625	0.336037		76	3.3365	4.1995	3.2839	3.2051	3.1989	3.1844	3.0103	2.9505	3.0472	3.3572	3.202	3.5439	2.5665	3.3491	2.8873	3.1298	2.8368	3.9368	3.0769	3.0198		76	2.5697	2.841	2.5262	2.5994	2.4566	2.2771	2.1067	2.155	3.2225	2.7307	3.1279	3.2751	3.0357	2.722	2.5308	3.0342	2.8595	2.9889	2.879	2.5871
3.24206	0.300962	2.70875	0.314607		77	3.1352	3.8848	3.4587	3.3254	3.3657	3.095	3.0452	2.9266	3.1111	3.2351	2.9344	3.5152	2.8684	3.248	3.2877	3.2608	2.7659	3.956	3.2263	3.1957		77	2.4932	3.0926	2.4635	2.5805	2.2504	2.4375	2.1184	2.3563	3.1611	2.7135	3.1004	3.0209	2.9637	2.6471	2.6238	2.9973	2.7132	2.7766	3.1517	2.5133
3.30018	0.286236	2.8151	0.3239		78	3.3161	4.003	3.437	3.3539	3.5093	3.2524	3.1085	2.8511	3.065	3.0429	3.1645	3.4823	3.0458	3.3979	3.5811	3.5965	2.7948	3.5586	3.2839	3.159		78	2.5203	2.9015	2.531	2.5182	2.4216	2.2826	2.4821	2.5283	3.4049	2.6699	3.3828	3.2383	3.1095	2.6882	3.0406	2.9844	2.9376	2.917	2.9557	2.7875
3.27907	0.272222	2.82918	0.344301		79	3.3038	3.8316	3.2176	3.5379	3.5066	3.291	3.1024	3.0205	2.8436	2.9354	3.4535	3.4624	3.031	3.539	3.2286	3.544	2.9123	3.5507	3.3046	2.9648		79	2.6169	3.3974	2.4413	2.4631	2.7713	2.0541	2.5663	2.5837	3.2244	2.8928	3.258	3.2205	2.8754	2.7765	3.0757	3.0951	2.5774	3.1225	2.985	2.5861
3.27984	0.245759	2.83553	0.341977		80	3.287	3.5728	3.3802	3.6173	3.5007	3.3068	3.1339	3.1385	2.9228	3.0429	3.1109	3.5785	3.0569	3.4236	3.1	3.6145	2.7411	3.456	3.2421	3.3703		80	2.5261	3.2621	2.4634	2.7674	3.111	2.2384	2.5798	2.3717	2.8942	3.0971	3.3352	3.4765	2.8145	2.8554	2.6782	3.16	2.8248	3.0676	2.7578	2.4294
3.37939	0.383052	2.92679	0.29972		81	2.8666	4.1052	3.5139	3.6936	3.6828	3.1334	3.2074	3.555	2.8438	3.2162	3.1666	3.8423	3.0536	3.3619	3.4679	3.8652	2.5499	3.3836	3.4862	3.5926		81	2.5386	3.1071	2.7413	2.6782	3.2547	2.5502	2.5929	2.4637	2.9857	3.2165	3.1805	3.3973	3.2391	2.8035	2.8486	3.1407	2.9511	3.1793	3.1744	2.4924
3.35574	0.370768	2.89354	0.297055		82	2.698	3.902	3.6474	3.3813	3.6412	3.2445	3.1149	3.6238	2.7852	3.4307	3.5658	3.3819	2.8431	3.4871	3.4075	3.7112	2.5534	3.5173	3.6507	3.5277		82	2.7144	2.8485	2.8129	2.6177	2.939	2.4469	2.5216	2.1837	2.8966	3.0642	3.0142	3.2887	3.1714	2.9842	3.1029	3.3176	2.6828	3.1276	3.2215	2.9145
3.35626	0.339975	2.89821	0.309272		83	2.5176	3.8637	3.4342	3.5404	3.8665	3.4281	3.2763	3.4915	3.0493	3.1063	3.4879	3.0788	3.1749	3.3356	3.5401	3.6835	2.7326	3.568	3.5695	3.3804		83	2.8325	2.8347	2.6621	2.6584	2.9905	2.5592	2.3881	2.3211	3.1845	3.1232	2.9329	3.1077	2.9752	2.8051	3.0591	3.2041	2.9026	3.6409	3.1315	2.6507
