# Supplementary material for: Hypoxia controls plasma membrane targeting of polarity proteins by dynamic turnover of PI4P and PI(4,5)P2
Source: eLife. 2022 Jun 9;11:e79582. doi: 10.7554/eLife.79582 (PMC9242647; doi:10.7554/eLife.79582)
Supplement: Figure 6—source data 4. [file elife-79582-fig6-data4.xlsx]

## Sheet: Figure 6B
	PM: RBO-GFP		PM: ypp1-RNAi
1	810.173		526.062
2	688.442		542.615
3	764.618		486
4	783.427		536.723
5	729.921		523.362
6	826.346		504.161
7	774.809		591.405
8	831.176		548.976
9	950.877		558.846
10	767.049		550.707
11	903.829		603.871
12	774.559		508.013
13	751.287		559.141
14	802.45		464
15	715.583		616.831
16	668.596		647.864
17	713.493		570.816
18	658.628		490.435
19	797.872		555.738
20	688.444		597.533
21	799.147		605.927
22	712.713		640.736
23	757.048		578.323
24	722.916		539.744
25	744.541		578.786
