# Supplementary material for: Hypoxia controls plasma membrane targeting of polarity proteins by dynamic turnover of PI4P and PI(4,5)P2
Source: eLife. 2022 Jun 9;11:e79582. doi: 10.7554/eLife.79582 (PMC9242647; doi:10.7554/eLife.79582)
Supplement: Figure 7—source data 1. [file elife-79582-fig7-data1.xlsx]

## Sheet: Figure 7A
Figure 7 Souce Data 1
						1	2	3	4	5	6	7	8	9	10	11	12	13	14	15			1	2	3	4	5	6	7	8	9	10	11	12	13	14	15	16	17	18	19
P4Mx2::GFP		MaLionR			P4Mx2::GFP																	MaLionR
AVG	STDEV	AVG	STDEV
t_C1_PM/Cy	t_C1_PM/Cy	t_C2_Cyto	t_C2_Cyto		min	t_C1_PM/Cy	t_C1_PM/Cy	t_C1_PM/Cy	t_C1_PM/Cy	t_C1_PM/Cy	t_C1_PM/Cy	t_C1_PM/Cy	t_C1_PM/Cy	t_C1_PM/Cy	t_C1_PM/Cy	t_C1_PM/Cy	t_C1_PM/Cy	t_C1_PM/Cy	t_C1_PM/Cy	t_C1_PM/Cy		min	t_C2_Cyto	t_C2_Cyto	t_C2_Cyto	t_C2_Cyto	t_C2_Cyto	t_C2_Cyto	t_C2_Cyto	t_C2_Cyto	t_C2_Cyto	t_C2_Cyto	t_C2_Cyto	t_C2_Cyto	t_C2_Cyto	t_C2_Cyto	t_C2_Cyto	t_C2_Cyto	t_C2_Cyto	t_C2_Cyto	t_C2_Cyto
0.90204	0.0706844	0.9889	0.00995791		1	0.9	1.0604	0.9687	0.8647	0.9093	0.8368	0.9048	0.9105	0.9014	0.9248	0.7221	0.905	0.8806	0.9377	0.9038		1	0.9885	0.997	0.9818	0.9813	0.9865	0.978	1.0109	1.0007	0.972	0.9998	0.9837	0.9789	0.9919	0.9899	1.0042	0.9819	0.9828	0.9893	0.99
0.887507	0.0408141	0.990847	0.00927041		2	0.9067	0.8772	0.9341	0.8571	0.8593	0.8529	0.9752	0.8896	0.8575	0.9193	0.8466	0.8424	0.8937	0.9456	0.8554		2	0.9924	0.9898	0.9938	0.9978	0.9891	0.9831	0.9763	0.996	0.9914	0.997	0.9884	1.0026	0.9857	0.9956	0.995	0.9876	0.9986	1.0022	0.9637
0.94296	0.0575513	1.02026	0.0123393		3	0.9643	0.8554	0.9188	0.9999	0.8961	0.9891	0.962	1.054	0.9436	0.8971	0.8552	0.9145	0.9311	0.9389	1.0244		3	1.0191	1.0132	1.0244	1.0209	1.0244	1.0389	1.0128	1.0033	1.0366	1.0032	1.0279	1.0185	1.0224	1.0146	1.0008	1.0305	1.0186	1.0085	1.0464
0.96124	0.0570567	0.974679	0.015678		4	0.971	0.9254	0.9463	0.8655	0.9368	1.0669	1.0153	1.038	0.9347	0.9364	0.987	0.8606	0.9716	0.9572	1.0059		4	0.973	0.9577	0.952	0.9778	0.9592	0.9813	0.9957	0.9745	0.9928	0.9699	0.9969	0.9994	0.9836	0.9728	0.9649	0.9701	0.9402	0.9807	0.9764
1.02511	0.0396062	0.918742	0.0270326		5	1.0062	0.9889	1.0286	0.9249	1.0281	1.0592	1.0122	1.0631	1.037	1.0509	1.0561	0.9903	1.0266	1.0135	1.091		5	0.8995	0.8876	0.8917	0.9489	0.8951	0.9378	0.9374	0.9301	0.9411	0.9016	0.9729	0.9556	0.9067	0.9292	0.902	0.917	0.8701	0.9355	0.8963
1.05411	0.0280168	0.822937	0.0508922		6	1.0213	1.0056	1.1192	1.0718	1.0517	1.0626	1.0577	1.074	1.0699	1.073	1.0364	1.0412	1.0445	1.0188	1.064		6	0.7773	0.7689	0.7506	0.8885	0.7772	0.8732	0.881	0.8062	0.8564	0.748	0.8978	0.8793	0.8294	0.8545	0.7981	0.8017	0.7534	0.8568	0.8375
1.07661	0.0265818	0.602116	0.094716		7	1.0709	1.0682	1.0799	1.1261	1.094	1.0589	1.0766	1.013	1.0873	1.0771	1.086	1.1166	1.0558	1.0566	1.0822		7	0.4929	0.5023	0.444	0.7135	0.5294	0.7004	0.7257	0.5122	0.646	0.4976	0.7029	0.6283	0.666	0.679	0.6047	0.4882	0.5412	0.6683	0.6976
1.06152	0.0323104	0.355011	0.0682528		8	1.0828	1.063	1.045	1.0839	1.0859	1.0188	1.0271	1.0296	1.0359	1.0527	1.1238	1.1003	1.0417	1.0994	1.0329		8	0.2626	0.2614	0.2691	0.4484	0.2855	0.3956	0.4494	0.3056	0.3676	0.296	0.4066	0.3462	0.4074	0.4036	0.3442	0.2933	0.3258	0.4036	0.4733
1.05129	0.049906	0.265463	0.0209051		9	1.0436	1.0747	0.9709	1.1022	1.0748	1.0348	1.0101	0.9936	1.0557	1.0364	1.1473	1.1221	1.0652	1.055	0.9829		9	0.237	0.2324	0.2486	0.3006	0.2368	0.2625	0.3022	0.2725	0.2725	0.2519	0.2948	0.2868	0.2585	0.2631	0.2441	0.2718	0.2633	0.2691	0.2753
1.03763	0.0632605	0.255937	0.0194544		10	1.0332	1.081	0.9886	1.1041	1.0642	1.0198	0.959	0.9346	1.0771	1.0323	1.1394	1.107	1.0893	0.9772	0.9576		10	0.237	0.2322	0.2441	0.2947	0.2359	0.2528	0.2762	0.2673	0.265	0.2469	0.2849	0.2857	0.2423	0.2452	0.2394	0.2749	0.2532	0.2499	0.2352
1.01463	0.0798363	0.258168	0.0200741		11	1.0343	1.0698	0.9589	1.1482	1.0292	0.9539	0.9182	0.913	1.0882	1.0188	1.1257	1.0873	1.0336	0.9268	0.9136		11	0.2376	0.2367	0.2505	0.2959	0.2379	0.2538	0.2816	0.2678	0.2652	0.25	0.2883	0.2901	0.2449	0.2474	0.2405	0.2789	0.2563	0.2492	0.2326
0.986373	0.0758122	0.260521	0.0199977		12	0.998	1.0428	0.9022	1.1103	0.9807	0.9366	0.8818	0.9524	1.0478	0.9983	1.0938	1.0523	1.0212	0.8867	0.8907		12	0.24	0.2386	0.2552	0.292	0.2416	0.2617	0.2843	0.2688	0.2657	0.2528	0.2948	0.2932	0.243	0.2514	0.242	0.2818	0.2582	0.2497	0.2351
0.950167	0.083248	0.264489	0.0212224		13	0.984	0.9744	0.8561	1.1086	0.971	0.88	0.8554	0.9008	1.0432	0.9393	1.0544	1.0373	0.9321	0.859	0.8569		13	0.2454	0.2404	0.2576	0.305	0.2456	0.2685	0.2865	0.2716	0.2734	0.252	0.2988	0.3009	0.2447	0.2537	0.2488	0.2817	0.2573	0.2535	0.2399
0.929247	0.0865052	0.266647	0.0218992		14	0.9482	0.9592	0.8249	1.0946	0.9594	0.8326	0.8129	0.9199	1.0334	0.9363	1.0188	1.0154	0.888	0.8502	0.8449		14	0.2438	0.2421	0.26	0.3012	0.2479	0.271	0.2897	0.2734	0.2761	0.2521	0.306	0.3061	0.2469	0.2563	0.2496	0.2836	0.2662	0.2535	0.2408
0.896607	0.0908379	0.268668	0.022767		15	0.9009	0.8838	0.7801	1.0718	0.9113	0.8024	0.8275	0.9135	1.0273	0.9271	0.988	0.9789	0.8504	0.8031	0.783		15	0.2438	0.2445	0.2649	0.3085	0.2486	0.2743	0.2904	0.2743	0.2777	0.2563	0.3068	0.3071	0.249	0.2578	0.2498	0.2913	0.2649	0.2553	0.2394
0.878553	0.0812686	0.270968	0.0227799		16	0.8997	0.8595	0.767	1.0017	0.908	0.7804	0.8205	0.9181	1.0247	0.8858	0.9461	0.9532	0.8239	0.8005	0.7892		16	0.2445	0.2449	0.2628	0.3183	0.2554	0.272	0.2899	0.2767	0.2817	0.2558	0.3071	0.3074	0.254	0.2614	0.2559	0.2922	0.2671	0.2591	0.2422
0.858967	0.093956	0.273268	0.0237761		17	0.8713	0.8223	0.7221	0.9954	0.9139	0.7651	0.8082	0.9229	1.0291	0.8613	0.9348	0.9338	0.7895	0.7731	0.7417		17	0.2475	0.2478	0.2684	0.3105	0.2564	0.2785	0.3004	0.2739	0.2852	0.255	0.3133	0.3178	0.2489	0.2637	0.2573	0.2901	0.2735	0.2622	0.2417
0.84196	0.101038	0.276974	0.0249182		18	0.8314	0.7521	0.6716	0.9547	0.9171	0.7601	0.8191	0.9563	1.0506	0.8393	0.8804	0.8998	0.7655	0.7904	0.741		18	0.2485	0.2506	0.2741	0.3238	0.2612	0.2826	0.2995	0.277	0.2873	0.2569	0.3184	0.3223	0.2536	0.2654	0.2626	0.2942	0.2759	0.264	0.2446
0.83822	0.11107	0.276805	0.0253175		19	0.8374	0.6751	0.6765	0.9137	0.9502	0.7224	0.8475	0.9598	1.0725	0.8267	0.8704	0.8957	0.7858	0.8011	0.7385		19	0.2489	0.248	0.2731	0.3244	0.2612	0.2908	0.3003	0.2737	0.2894	0.2579	0.318	0.3238	0.2549	0.266	0.2641	0.2907	0.2661	0.2618	0.2462
0.84296	0.13245	0.279963	0.0266197		20	0.8291	0.6782	0.63	0.9346	0.9481	0.7228	0.8363	1.0205	1.13	0.817	0.838	0.9175	0.7725	0.8445	0.7253		20	0.2514	0.2509	0.2746	0.3306	0.2616	0.2908	0.3108	0.2748	0.2893	0.2567	0.3201	0.3297	0.2589	0.2678	0.2654	0.2961	0.277	0.2657	0.2471
0.845687	0.151946	0.280774	0.0274197		21	0.8169	0.6192	0.6131	0.937	0.982	0.6791	0.8471	1.0192	1.1832	0.8203	0.8349	0.9116	0.8085	0.8728	0.7404		21	0.2523	0.2507	0.2841	0.3335	0.2612	0.2945	0.3057	0.2747	0.2927	0.2557	0.3203	0.3335	0.2585	0.2704	0.2681	0.2978	0.2684	0.2681	0.2445
0.854007	0.158876	0.283263	0.0278366		22	0.8031	0.5966	0.6141	0.9348	1.0121	0.6773	0.8478	1.0599	1.1527	0.7988	0.8682	0.9277	0.8701	0.9278	0.7191		22	0.2524	0.2544	0.2817	0.3432	0.2647	0.2897	0.3142	0.2759	0.2964	0.2599	0.3237	0.3317	0.2634	0.2694	0.2713	0.2979	0.2733	0.2714	0.2474
0.879547	0.176635	0.285595	0.0303217		23	0.802	0.6109	0.6104	0.9328	1.0151	0.6937	0.8539	1.1093	1.2298	0.7979	0.879	0.9367	0.9516	1.0249	0.7452		23	0.2541	0.2535	0.2808	0.3462	0.2627	0.2985	0.3138	0.2771	0.2982	0.2583	0.3316	0.3437	0.2639	0.2721	0.2702	0.3028	0.2793	0.2723	0.2472
0.901793	0.186959	0.285758	0.0311931		24	0.8092	0.611	0.6361	0.9953	1.0324	0.6637	0.8485	1.1496	1.2347	0.8216	0.8719	0.9856	0.9863	1.0881	0.7929		24	0.2524	0.2522	0.2806	0.3465	0.263	0.3001	0.3135	0.278	0.3041	0.258	0.3347	0.3442	0.2627	0.2738	0.2753	0.3004	0.2734	0.2728	0.2437
0.91618	0.194616	0.287095	0.031705		25	0.8217	0.6197	0.6033	0.9983	1.0517	0.6535	0.8882	1.1734	1.1907	0.8555	0.9037	0.995	1.0786	1.1275	0.7819		25	0.2532	0.2551	0.281	0.341	0.2653	0.306	0.3192	0.277	0.3053	0.2578	0.339	0.3474	0.2608	0.2742	0.2762	0.3051	0.2733	0.2734	0.2445
0.9364	0.203596	0.289589	0.0345283		26	0.8271	0.6182	0.6212	0.9868	1.0686	0.6499	0.8969	1.1313	1.2187	0.8724	0.9449	1.0505	1.1406	1.2055	0.8134		26	0.2547	0.2542	0.2776	0.3603	0.2679	0.307	0.3209	0.2775	0.3065	0.2583	0.3427	0.3551	0.2618	0.276	0.279	0.3047	0.275	0.277	0.246
0.964933	0.189995	0.291753	0.0360072		27	0.8917	0.6869	0.6674	0.9823	1.0683	0.6822	0.9172	1.1465	1.1859	0.9013	1.0129	1.0834	1.1988	1.2208	0.8284		27	0.2533	0.2563	0.2825	0.3605	0.2659	0.3128	0.3238	0.2768	0.3129	0.2598	0.3505	0.3601	0.2655	0.2756	0.2789	0.3092	0.2703	0.2793	0.2493
0.961713	0.182106	0.291595	0.0360123		28	0.8893	0.7192	0.6612	0.9846	1.0486	0.679	0.9127	1.0706	1.1667	0.9215	1.0322	1.0901	1.179	1.241	0.83		28	0.2524	0.2544	0.2786	0.3626	0.2684	0.3132	0.3283	0.2784	0.3107	0.2588	0.3489	0.3578	0.2653	0.2794	0.2799	0.3032	0.2749	0.2784	0.2467
0.96408	0.176273	0.295553	0.0386414		29	0.9084	0.7331	0.6677	1.0033	1.0124	0.6883	0.8958	0.9994	1.1814	0.9319	1.0478	1.1451	1.171	1.2155	0.8601		29	0.2572	0.257	0.2866	0.3654	0.2711	0.3169	0.3267	0.2789	0.3181	0.2606	0.3583	0.3778	0.2658	0.2849	0.2821	0.3068	0.2696	0.2814	0.2503
0.958353	0.153225	0.297916	0.0403014		30	0.9289	0.7518	0.7031	1.0183	1.0087	0.6965	0.9072	0.9506	1.1149	0.9475	1.0786	1.1333	1.1185	1.154	0.8634		30	0.2558	0.2583	0.2897	0.3812	0.2702	0.3159	0.3329	0.2808	0.3188	0.261	0.3567	0.3802	0.2678	0.2867	0.2824	0.3092	0.2761	0.2861	0.2506
0.947527	0.13412	0.300326	0.040483		31	0.9738	0.7735	0.7177	0.9898	0.9723	0.7017	0.9277	0.896	1.0965	0.9301	1.0513	1.1091	1.0845	1.0935	0.8954		31	0.2573	0.2574	0.2883	0.383	0.2682	0.3227	0.3375	0.2802	0.3234	0.2624	0.3643	0.3741	0.2706	0.2934	0.2877	0.3114	0.2825	0.2901	0.2517
0.942847	0.129855	0.301458	0.0423062		32	0.9661	0.7918	0.7273	1.0171	0.9717	0.6945	0.9267	0.8346	1.0395	0.9514	1.0626	1.1064	1.066	1.0814	0.9056		32	0.2579	0.2575	0.2886	0.3814	0.2712	0.3277	0.3418	0.283	0.3263	0.2588	0.3665	0.3844	0.2691	0.2911	0.2863	0.3155	0.2771	0.2914	0.2521
0.920693	0.104496	0.302268	0.0424126		33	0.9485	0.8086	0.7465	1.0057	0.9185	0.7394	0.9022	0.8005	1.0154	0.9456	0.9998	1.0907	0.9821	0.9961	0.9108		33	0.2555	0.2595	0.2894	0.3837	0.2676	0.3282	0.3421	0.2833	0.3292	0.26	0.3682	0.3812	0.2698	0.2935	0.289	0.3188	0.2817	0.2902	0.2522
0.90162	0.100506	0.305942	0.0438645		34	0.958	0.8007	0.758	0.948	0.908	0.7307	0.8858	0.7321	1.0051	0.9344	1.0009	1.0427	0.9504	0.9562	0.9133		34	0.259	0.2606	0.2927	0.3886	0.2716	0.3316	0.3439	0.2862	0.336	0.2641	0.3809	0.385	0.2702	0.2992	0.295	0.3192	0.2808	0.2954	0.2529
0.87862	0.0907349	0.3074	0.0457099		35	0.9695	0.7758	0.7737	0.9522	0.8824	0.7656	0.8865	0.6828	0.9112	0.9226	0.9444	1.0213	0.9054	0.8918	0.8941		35	0.2598	0.2623	0.2961	0.3885	0.274	0.3364	0.3493	0.2839	0.3371	0.2611	0.3818	0.3988	0.2706	0.3004	0.2943	0.3172	0.2783	0.296	0.2547
0.860047	0.0799172	0.308995	0.0465403		36	0.9506	0.7845	0.7622	0.9139	0.8636	0.7618	0.8619	0.6971	0.9231	0.8666	0.9041	1.0035	0.8657	0.8704	0.8717		36	0.2603	0.2599	0.2957	0.3928	0.2731	0.3381	0.3492	0.2875	0.3406	0.2605	0.3879	0.3967	0.2699	0.2996	0.2966	0.324	0.2831	0.2989	0.2565
0.8374	0.0742524	0.312842	0.0504142		37	0.9404	0.8005	0.7628	0.8322	0.8521	0.7124	0.8685	0.6893	0.8638	0.8404	0.8789	0.9658	0.8282	0.8457	0.88		37	0.2623	0.2633	0.3062	0.3996	0.2726	0.3453	0.3535	0.2882	0.3402	0.2633	0.39	0.4228	0.2706	0.3057	0.2983	0.328	0.2762	0.3021	0.2558
0.82526	0.0744878	0.315574	0.0516662		38	0.9375	0.7422	0.7758	0.7963	0.8338	0.7228	0.8617	0.6782	0.8378	0.8406	0.8391	0.9407	0.8314	0.8297	0.9113		38	0.2641	0.263	0.3073	0.4132	0.2767	0.3478	0.3564	0.2917	0.3471	0.2622	0.3961	0.4183	0.2703	0.3071	0.3044	0.3307	0.2796	0.303	0.2569
0.7972	0.0667633	0.318216	0.0535889		39	0.9463	0.7202	0.7975	0.7518	0.7761	0.7224	0.8592	0.6841	0.7959	0.799	0.8171	0.8905	0.7837	0.8104	0.8038		39	0.2672	0.2642	0.3122	0.4095	0.2783	0.3507	0.3642	0.2921	0.3495	0.2621	0.4071	0.4304	0.273	0.3074	0.3044	0.3319	0.2773	0.3041	0.2605
0.774487	0.0745646	0.321137	0.0549168		40	0.9208	0.6694	0.7452	0.6918	0.7704	0.7171	0.8444	0.6752	0.7509	0.7763	0.7567	0.9043	0.7873	0.8078	0.7997		40	0.2666	0.2656	0.3173	0.4051	0.2755	0.3507	0.368	0.2959	0.3569	0.2635	0.4096	0.4453	0.2785	0.3099	0.3091	0.3325	0.2794	0.3097	0.2625
0.746227	0.069478	0.326653	0.0567041		41	0.8936	0.6309	0.7105	0.7042	0.7628	0.7097	0.777	0.6654	0.6779	0.7781	0.7382	0.8608	0.7375	0.7742	0.7726		41	0.2673	0.2681	0.3209	0.4149	0.285	0.3614	0.3736	0.2973	0.3577	0.265	0.4136	0.4578	0.2828	0.3119	0.3155	0.3407	0.2926	0.3155	0.2648
0.727347	0.0729883	0.328911	0.0592383		42	0.8872	0.5847	0.7202	0.7102	0.7472	0.6925	0.7587	0.6431	0.6352	0.7424	0.7348	0.8184	0.7253	0.7511	0.7592		42	0.2673	0.2692	0.322	0.4209	0.2819	0.3633	0.3811	0.3011	0.3594	0.2644	0.4206	0.4654	0.2839	0.3147	0.3175	0.3452	0.2854	0.3173	0.2687
0.70708	0.08249	0.334258	0.061759		43	0.877	0.5591	0.6711	0.6792	0.7516	0.6928	0.7793	0.6316	0.5706	0.7081	0.7319	0.8015	0.6945	0.7339	0.724		43	0.2698	0.2702	0.3286	0.4332	0.2872	0.3643	0.3877	0.3009	0.3682	0.267	0.432	0.4746	0.2903	0.318	0.3224	0.3522	0.2938	0.32	0.2705
0.68462	0.0782913	0.337079	0.0634911		44	0.8537	0.5295	0.6649	0.6715	0.7244	0.6517	0.7231	0.6436	0.5513	0.6902	0.6984	0.7694	0.6848	0.7243	0.6885		44	0.2719	0.275	0.3346	0.429	0.29	0.3704	0.3917	0.308	0.3716	0.2638	0.4358	0.4879	0.2892	0.3211	0.3266	0.3537	0.2872	0.3249	0.2721
0.66402	0.0751047	0.340642	0.0657524		45	0.8191	0.5091	0.6586	0.6369	0.7068	0.6673	0.6889	0.6487	0.523	0.6647	0.6614	0.7389	0.6508	0.7001	0.686		45	0.2745	0.2759	0.3384	0.4493	0.2924	0.3676	0.3951	0.3105	0.3731	0.2654	0.439	0.4946	0.294	0.3224	0.3322	0.3594	0.2909	0.3262	0.2713
0.64524	0.0847611	0.344095	0.0670986		46	0.803	0.4565	0.6376	0.6035	0.6928	0.6438	0.7096	0.6273	0.4903	0.654	0.6574	0.686	0.6508	0.7202	0.6458		46	0.2757	0.2781	0.3361	0.4483	0.2935	0.3754	0.3984	0.3124	0.3778	0.2709	0.4415	0.5085	0.2985	0.3292	0.3356	0.3637	0.2895	0.3284	0.2763
0.63052	0.0813493	0.347816	0.0671341		47	0.781	0.446	0.6155	0.6018	0.681	0.6304	0.6757	0.6191	0.4785	0.6479	0.6193	0.6656	0.6544	0.6991	0.6425		47	0.2768	0.2789	0.3444	0.4506	0.295	0.3804	0.4014	0.3165	0.3807	0.2694	0.4525	0.5048	0.2997	0.3265	0.3388	0.3746	0.3071	0.3313	0.2791
0.618333	0.0891075	0.351368	0.0700252		48	0.7706	0.4319	0.589	0.5811	0.7014	0.6747	0.6554	0.5899	0.4406	0.6165	0.6267	0.6602	0.6238	0.6908	0.6224		48	0.2786	0.2779	0.3444	0.4558	0.2978	0.3802	0.3993	0.3199	0.3911	0.2713	0.4624	0.5202	0.3054	0.3347	0.3436	0.374	0.3065	0.3364	0.2765
0.629693	0.0852914	0.2973	0.059179		49	0.7672	0.435	0.6122	0.5946	0.7078	0.6477	0.6573	0.626	0.4642	0.6405	0.6386	0.6948	0.6597	0.687	0.6128		49	0.2367	0.2355	0.29	0.3903	0.2466	0.3253	0.3492	0.2476	0.3008	0.2173	0.3758	0.4404	0.2779	0.3109	0.2921	0.3231	0.2557	0.2813	0.2522
0.625787	0.0902539	0.254437	0.0542759		50	0.7193	0.4384	0.5997	0.6313	0.7255	0.6488	0.6615	0.663	0.414	0.6542	0.6216	0.6878	0.664	0.6805	0.5772		50	0.1986	0.1983	0.2429	0.3437	0.2136	0.2833	0.2985	0.218	0.2749	0.1905	0.3397	0.3801	0.2248	0.2419	0.2408	0.2758	0.2267	0.2391	0.2031
0.612173	0.0989046	0.253537	0.0552691		51	0.6732	0.4263	0.5907	0.6766	0.7173	0.6426	0.6925	0.6532	0.3697	0.6273	0.6213	0.6709	0.6162	0.6772	0.5276		51	0.1973	0.2001	0.2408	0.349	0.212	0.2794	0.304	0.2182	0.2746	0.1937	0.3439	0.3768	0.218	0.2331	0.2363	0.2705	0.2281	0.2436	0.1978
0.612313	0.103853	0.2537	0.0568196		52	0.6526	0.4329	0.5777	0.6305	0.7375	0.6699	0.7196	0.6479	0.3704	0.6214	0.6192	0.6835	0.6585	0.6714	0.4917		52	0.2003	0.198	0.2464	0.3487	0.2121	0.2864	0.3	0.215	0.2718	0.1927	0.345	0.3858	0.2217	0.2352	0.2372	0.2709	0.2152	0.241	0.1969
0.602707	0.106542	0.251189	0.055583		53	0.6287	0.4214	0.5852	0.6428	0.7412	0.6146	0.7473	0.6708	0.3731	0.6226	0.6191	0.6488	0.6279	0.6396	0.4575		53	0.1978	0.192	0.2394	0.3476	0.2081	0.2819	0.2961	0.2128	0.2727	0.1903	0.3411	0.3738	0.2242	0.2372	0.2323	0.2734	0.2196	0.2387	0.1936
0.59314	0.102455	0.252163	0.0568776		54	0.6181	0.4213	0.56	0.6173	0.7363	0.5818	0.7164	0.6633	0.3762	0.5922	0.6058	0.659	0.6455	0.6433	0.4606		54	0.1979	0.1921	0.2475	0.3493	0.2091	0.2886	0.2972	0.2103	0.2711	0.19	0.3439	0.3774	0.2201	0.2381	0.2339	0.2746	0.2195	0.2385	0.192
0.591087	0.109025	0.253653	0.0557122		55	0.655	0.4335	0.5765	0.6184	0.7509	0.5503	0.7246	0.6593	0.362	0.591	0.6103	0.6209	0.6218	0.6644	0.4274		55	0.2017	0.1962	0.2482	0.3449	0.2122	0.2875	0.303	0.21	0.271	0.1915	0.3454	0.3768	0.2207	0.2434	0.2382	0.2714	0.2236	0.2414	0.1923
0.601073	0.114105	0.254853	0.0577377		56	0.6961	0.4797	0.5814	0.6246	0.7774	0.5324	0.7326	0.6756	0.3622	0.5901	0.6008	0.6237	0.6479	0.6741	0.4175		56	0.2053	0.2025	0.2504	0.3564	0.2072	0.2926	0.3032	0.2077	0.2711	0.19	0.3481	0.3828	0.2212	0.2419	0.2334	0.2698	0.2261	0.2374	0.1951
0.621347	0.129632	0.253179	0.0562217		57	0.7683	0.5124	0.5858	0.6454	0.7914	0.5109	0.7598	0.7203	0.3695	0.588	0.5804	0.6413	0.7246	0.7116	0.4105		57	0.2101	0.2041	0.2446	0.3429	0.2073	0.2977	0.3001	0.2034	0.2665	0.1897	0.3399	0.3836	0.2227	0.2414	0.2389	0.2722	0.218	0.2361	0.1912
0.63924	0.141863	0.255584	0.0581978		58	0.8236	0.5795	0.6081	0.6296	0.7845	0.4921	0.7948	0.7446	0.3731	0.6006	0.5523	0.62	0.8107	0.7458	0.4293		58	0.2215	0.2151	0.2478	0.3578	0.2028	0.3156	0.3009	0.199	0.2637	0.1893	0.3488	0.3754	0.2183	0.2396	0.2369	0.277	0.2202	0.2378	0.1886
0.671707	0.160364	0.259053	0.059698		59	0.8469	0.65	0.6323	0.6478	0.8305	0.4778	0.8006	0.8148	0.3998	0.6365	0.5207	0.633	0.9072	0.8256	0.4521		59	0.2353	0.2352	0.2494	0.3566	0.2038	0.3439	0.3026	0.2002	0.2639	0.1888	0.3519	0.3797	0.2233	0.2387	0.2333	0.2717	0.2214	0.235	0.1873
0.706427	0.186064	0.270474	0.0676881		60	0.8863	0.6871	0.6687	0.6201	0.8752	0.4687	0.8384	0.9022	0.4392	0.6447	0.5279	0.6285	1.0087	0.9214	0.4793		60	0.2637	0.2711	0.2506	0.3559	0.2027	0.4214	0.306	0.2033	0.2677	0.191	0.3647	0.3817	0.2231	0.2409	0.2347	0.298	0.23	0.2421	0.1904
0.73988	0.206538	0.288163	0.0919734		61	0.9007	0.7408	0.6757	0.6118	0.9101	0.472	0.8595	0.9966	0.4864	0.6722	0.5195	0.6666	1.061	1.03	0.4953		61	0.3026	0.3232	0.2593	0.3667	0.2057	0.5637	0.3077	0.2077	0.2665	0.193	0.3952	0.385	0.2275	0.2435	0.2397	0.3229	0.2344	0.2397	0.1911
0.788493	0.227068	0.311784	0.132594		62	0.9944	0.757	0.7591	0.6233	0.9757	0.4772	0.9047	1.0362	0.4957	0.7333	0.5627	0.7084	1.1526	1.1084	0.5387		62	0.3512	0.3903	0.2559	0.3928	0.2084	0.7565	0.3144	0.2125	0.2693	0.1946	0.4336	0.3879	0.2261	0.244	0.2445	0.37	0.2369	0.2432	0.1918
0.808653	0.216457	0.333947	0.170381		63	0.9614	0.7883	0.7935	0.6509	1.0023	0.476	0.8783	1.0524	0.5763	0.7936	0.5546	0.7729	1.146	1.1233	0.56		63	0.4145	0.4694	0.2588	0.3908	0.2081	0.9175	0.3136	0.223	0.2692	0.1988	0.4991	0.3808	0.2285	0.2482	0.2421	0.4034	0.2385	0.2443	0.1964
0.834327	0.199809	0.361874	0.205358		64	0.9916	0.8054	0.8665	0.7245	1.0544	0.5151	0.9058	1.0596	0.6315	0.7733	0.5788	0.8606	1.1079	1.0729	0.567		64	0.5005	0.5757	0.2608	0.4087	0.2078	1.0191	0.313	0.2348	0.2731	0.2071	0.6114	0.3769	0.2331	0.2491	0.2506	0.4789	0.2305	0.2503	0.1942
0.87074	0.223536	0.393011	0.241491		65	0.9568	0.8392	0.9348	0.766	1.1516	0.524	0.9489	1.1139	0.6985	0.7988	0.5517	0.9377	1.1644	1.1392	0.5356		65	0.5938	0.6648	0.267	0.4282	0.2138	1.0865	0.3199	0.2451	0.2743	0.2128	0.7793	0.3591	0.2369	0.2474	0.2502	0.5861	0.244	0.2603	0.1977
0.886627	0.212781	0.422911	0.27725		66	0.9653	0.8481	0.926	0.7786	1.1194	0.575	0.9558	1.1406	0.6996	0.7997	0.5788	1.0585	1.1617	1.1169	0.5754		66	0.6627	0.7323	0.2591	0.4525	0.2135	1.1131	0.3254	0.2597	0.2768	0.2246	0.9721	0.3454	0.2455	0.2494	0.2548	0.7201	0.263	0.2635	0.2018
0.89122	0.205847	0.458721	0.313589		67	1.0221	0.8925	0.9758	0.7901	1.1657	0.6441	0.9508	1.1026	0.7093	0.7681	0.5601	1.1333	1.1197	0.9601	0.574		67	0.7216	0.7734	0.2644	0.4909	0.2226	1.1108	0.3345	0.2786	0.2778	0.2414	1.1714	0.3801	0.2487	0.2519	0.2597	0.8988	0.3022	0.2817	0.2052
0.90712	0.21745	0.493095	0.348304		68	1.1446	0.8546	0.9475	0.8285	1.1687	0.6484	0.9348	1.0921	0.7291	0.7606	0.5648	1.2523	1.1322	0.9312	0.6174		68	0.7498	0.7811	0.2693	0.5478	0.2326	1.1142	0.3474	0.2997	0.2828	0.2623	1.3617	0.4294	0.2617	0.2518	0.2655	1.0524	0.3493	0.294	0.216
0.916627	0.226442	0.520474	0.374769		69	1.0747	0.8281	0.9243	0.8486	1.1583	0.6896	0.9899	1.0895	0.7714	0.7488	0.561	1.3164	1.2535	0.8681	0.6272		69	0.7618	0.7799	0.2769	0.6043	0.2441	1.1157	0.3665	0.3384	0.2834	0.2927	1.533	0.4579	0.2769	0.2527	0.27	1.126	0.3655	0.3118	0.2315
0.924767	0.223204	0.538584	0.384966		70	0.9838	0.9071	0.9754	0.8698	1.0809	0.7083	0.9702	1.0487	0.7959	0.7662	0.5695	1.3613	1.2904	0.946	0.598		70	0.7558	0.7482	0.2821	0.6762	0.2514	1.0946	0.3784	0.3936	0.2923	0.3306	1.6496	0.4953	0.2958	0.2591	0.2705	1.1268	0.331	0.3347	0.2671
0.934647	0.245735	0.561089	0.388762		71	0.91	0.9014	0.9565	0.9313	1.1253	0.736	0.9873	1.0535	0.7875	0.7991	0.5698	1.4832	1.2877	0.9459	0.5452		71	0.7489	0.7399	0.2848	0.721	0.261	1.1045	0.3928	0.4925	0.2926	0.3695	1.6914	0.5409	0.3203	0.2619	0.2749	1.1614	0.3351	0.3638	0.3035
0.953013	0.252627	0.581111	0.380673		72	0.9406	0.9356	0.9251	0.9751	1.1762	0.7527	1.0052	1.0509	0.7921	0.8179	0.5617	1.4656	1.3724	0.9629	0.5612		72	0.7392	0.726	0.2871	0.7831	0.273	1.1112	0.4013	0.6154	0.2967	0.4114	1.6799	0.5437	0.35	0.2653	0.2826	1.1582	0.3551	0.4012	0.3607
0.946007	0.259132	0.602405	0.373718		73	0.8904	0.9222	0.9274	1.0324	1.2	0.6816	0.9726	0.9817	0.8269	0.8007	0.6078	1.5191	1.3476	0.924	0.5557		73	0.7274	0.7433	0.2993	0.8005	0.2787	1.1105	0.4104	0.7208	0.2998	0.445	1.6809	0.5961	0.386	0.2651	0.2923	1.142	0.3829	0.4378	0.4269
0.949367	0.259944	0.626921	0.366403		74	0.9034	0.8939	0.8725	0.9856	1.2078	0.6778	1.0318	0.9386	0.8179	0.847	0.6688	1.5301	1.3559	0.9798	0.5296		74	0.7348	0.7452	0.3097	0.8372	0.29	1.1164	0.4267	0.7859	0.3124	0.4738	1.6753	0.681	0.4204	0.2677	0.2953	1.1242	0.435	0.4952	0.4853
0.92536	0.242815	0.643674	0.36065		75	0.8653	0.8057	0.8638	0.9105	1.1598	0.6735	0.9753	0.9813	0.8855	0.8068	0.6638	1.5103	1.2965	0.8955	0.5868		75	0.7346	0.7313	0.327	0.8616	0.2942	1.1505	0.443	0.7981	0.3133	0.4959	1.6538	0.7129	0.4689	0.2729	0.31	1.1318	0.4433	0.5567	0.53
0.937153	0.216206	0.663137	0.358377		76	0.9459	0.8381	0.8598	0.9756	1.0518	0.7183	1.0434	0.991	0.9407	0.8215	0.6717	1.5064	1.2055	0.8037	0.6839		76	0.7214	0.7362	0.3527	0.8935	0.3022	1.1461	0.4474	0.7957	0.321	0.5176	1.6709	0.798	0.5088	0.2743	0.321	1.1305	0.4934	0.6183	0.5506
0.940227	0.238555	0.673484	0.350976		77	0.8341	0.7784	0.8413	1.0974	0.9716	0.7382	1.0707	0.9607	0.9602	0.8184	0.6868	1.6161	1.1886	0.8409	0.7		77	0.7135	0.734	0.3951	0.8773	0.3041	1.1437	0.458	0.7767	0.3285	0.5322	1.649	0.8839	0.555	0.2732	0.33	1.1208	0.4785	0.6834	0.5593
0.953607	0.252805	0.689958	0.348789		78	0.7936	0.7727	0.85	1.0481	0.9438	0.7777	1.0414	0.9526	0.9088	0.785	0.8226	1.6915	1.293	0.935	0.6883		78	0.7139	0.7452	0.4738	0.8803	0.3071	1.133	0.4584	0.7825	0.3396	0.5465	1.6598	0.9521	0.5953	0.2695	0.3394	1.1145	0.4961	0.7406	0.5616
0.948013	0.248597	0.707953	0.349733		79	0.8466	0.7716	0.8218	0.9951	0.9146	0.8092	1.0624	0.9219	0.8606	0.7958	0.8567	1.6905	1.2886	0.8836	0.7012		79	0.717	0.7324	0.5799	0.8823	0.3131	1.1413	0.4675	0.7866	0.3435	0.5603	1.671	1.0297	0.6282	0.2687	0.3486	1.1092	0.4971	0.8016	0.5731
0.98528	0.275286	0.728568	0.362983		80	0.8635	0.7675	0.7888	1.0005	0.9326	0.8444	1.0983	0.9465	0.8907	0.8325	0.9552	1.8497	1.2753	0.9901	0.7436		80	0.7155	0.7289	0.7061	0.872	0.3165	1.1462	0.4813	0.8063	0.3532	0.5684	1.74	1.0907	0.6424	0.2753	0.3535	1.1366	0.489	0.8522	0.5687
1.00358	0.227233	0.725421	0.360012		81	1.0559	0.7947	0.7724	1.0259	1.1324	0.8315	1.0124	0.941	0.8899	0.9153	0.9341	1.4738	1.4149	1.1996	0.6599		81	0.6733	0.6872	0.8001	0.8292	0.3271	1.0603	0.4634	0.8101	0.3653	0.5543	1.756	1.1752	0.6509	0.2872	0.3522	1.0591	0.4742	0.8536	0.6043
1.00959	0.222941	0.743426	0.37486		82	1.1617	0.7835	0.7186	1.1046	1.1038	0.8274	1.0133	0.9238	0.9007	0.9657	0.9468	1.418	1.4191	1.1662	0.6907		82	0.6726	0.6935	0.8749	0.8555	0.3359	1.0733	0.4666	0.8342	0.384	0.5684	1.8313	1.2317	0.6594	0.3	0.3603	1.0413	0.4774	0.8744	0.5904
1.01412	0.247408	0.766668	0.384231		83	1.1616	0.7457	0.6657	1.035	1.0448	0.8627	1.0422	1.0573	0.8732	0.9679	1.0351	1.578	1.3843	1.1038	0.6545		83	0.6835	0.6963	0.9125	0.8754	0.3476	1.0899	0.4882	0.8333	0.3955	0.592	1.8538	1.3214	0.6741	0.3074	0.3827	1.0776	0.4969	0.9368	0.6018
1.03093	0.22367	0.800147	0.403063		84	1.137	0.8189	0.6468	1.0738	1.0912	0.8879	1.0628	0.9619	0.9674	1.05	1.094	1.4328	1.4126	1.1602	0.6667		84	0.6946	0.7163	0.957	0.9041	0.3486	1.1213	0.5132	0.8431	0.4059	0.6105	1.9296	1.4339	0.7371	0.3329	0.405	1.0996	0.5128	0.991	0.6463
1.04507	0.251193	0.799974	0.402055		85	1.2044	0.8014	0.6239	1.1481	1.0876	0.8429	1.0664	0.9292	0.9999	1.1268	1.0851	1.5954	1.385	1.0864	0.6935		85	0.6972	0.7016	0.956	0.9128	0.3478	1.1338	0.5123	0.8263	0.4027	0.5971	1.9132	1.4646	0.7218	0.3464	0.4214	1.0915	0.5207	0.981	0.6513
1.06125	0.238404	0.799484	0.402646		86	1.267	0.839	0.6976	1.1008	1.1875	0.865	1.1023	0.9682	0.9735	1.084	1.0361	1.4721	1.4886	1.147	0.6901		86	0.6877	0.7052	0.9342	0.9427	0.3503	1.12	0.5156	0.8054	0.4072	0.601	1.9134	1.4955	0.7053	0.359	0.4351	1.0765	0.5071	0.9821	0.6469
1.05983	0.240091	0.804458	0.406352		87	1.2671	0.7634	0.6647	1.154	1.1434	0.8339	1.0334	1.0176	0.9707	1.1334	1.1169	1.4413	1.4173	1.2391	0.7012		87	0.6798	0.6909	0.9383	0.9638	0.3572	1.13	0.5141	0.8096	0.4186	0.6061	1.923	1.5365	0.704	0.3757	0.449	1.0698	0.5038	0.9712	0.6433
1.07573	0.213781	0.802226	0.404236		88	1.1535	0.7922	0.8068	1.1134	1.1983	0.9227	1.0072	1.0504	1.0318	1.1578	1.1538	1.3594	1.4561	1.2595	0.673		88	0.6637	0.6815	0.9122	0.9653	0.3546	1.1602	0.5124	0.8009	0.4198	0.6044	1.8993	1.5508	0.6953	0.4012	0.4525	1.054	0.4952	0.9749	0.6441
1.07153	0.225221	0.798958	0.399124		89	1.0226	0.8178	0.7617	1.0562	1.2945	0.9048	1.0173	1.0339	1.0046	1.1933	1.1232	1.3792	1.4746	1.2899	0.6994		89	0.6534	0.676	0.9068	0.9584	0.3553	1.1107	0.5294	0.7938	0.4237	0.6035	1.8794	1.5738	0.688	0.4271	0.469	1.0619	0.4911	0.9583	0.6206
1.08756	0.209244	0.797811	0.398557		90	1.0487	0.8391	0.9041	1.1238	1.3436	0.9098	0.9963	0.9778	0.9635	1.1758	1.2234	1.297	1.4326	1.3455	0.7324		90	0.6549	0.6567	0.8962	0.966	0.3594	1.1137	0.5225	0.7809	0.4266	0.5938	1.8835	1.5723	0.6871	0.4587	0.478	1.059	0.481	0.952	0.6161
1.106	0.219878	0.802868	0.403358		91	1.1323	0.8482	0.9322	0.9989	1.3454	0.9051	1.0072	1.0391	0.9655	1.1454	1.257	1.3318	1.4696	1.4444	0.7679		91	0.6371	0.6607	0.9243	1.0001	0.3635	1.1028	0.5383	0.7886	0.4372	0.5954	1.9156	1.584	0.6716	0.478	0.4843	1.0342	0.4794	0.9606	0.5988
1.10877	0.228217	0.807153	0.403938		92	1.2021	0.8454	0.97	0.9312	1.3206	0.8452	1.0041	0.9937	0.967	1.1776	1.2759	1.4428	1.4902	1.3573	0.8085		92	0.6405	0.6588	0.9357	1.0137	0.3588	1.1074	0.5472	0.7986	0.4366	0.5868	1.9179	1.6055	0.6811	0.5049	0.4905	1.0106	0.4833	0.9476	0.6104
1.10921	0.182418	0.811747	0.408082		93	1.0524	0.8836	1.0143	1.0622	1.2728	0.8614	1.0721	1.061	1.0011	1.1133	1.2849	1.4034	1.3966	1.2977	0.8614		93	0.6508	0.6736	0.9339	1.0217	0.3674	1.0931	0.5527	0.7929	0.4419	0.5823	1.953	1.6219	0.6927	0.5329	0.4892	0.9994	0.4843	0.942	0.5975
1.12249	0.182356	0.813821	0.411226		94	1.0405	0.9129	0.9989	1.0124	1.2693	0.904	1.0397	1.0454	1.0422	1.1933	1.3332	1.4313	1.4237	1.2713	0.9192		94	0.6409	0.6693	0.9465	1.0194	0.362	1.1063	0.5477	0.799	0.449	0.5776	1.9562	1.6459	0.6863	0.5556	0.495	0.9791	0.4794	0.9459	0.6015
1.10149	0.178218	0.818111	0.420695		95	1.0254	0.8957	0.9727	1.1068	1.3749	0.7836	1.063	1.0832	0.9706	1.1444	1.3761	1.286	1.301	1.196	0.943		95	0.6343	0.6644	0.936	1.0069	0.3674	1.1276	0.5423	0.7994	0.4512	0.5782	2.0028	1.668	0.6978	0.5751	0.49	0.9728	0.4744	0.9494	0.6061
1.12999	0.185763	0.821405	0.426571		96	1.0666	0.8952	1.0504	1.089	1.3006	0.7627	1.0442	1.0935	1.0996	1.1621	1.4579	1.3718	1.3076	1.2721	0.9765		96	0.6173	0.6217	0.9247	1.0153	0.3614	1.1568	0.5455	0.8033	0.4597	0.5778	2.0005	1.7159	0.6849	0.6048	0.491	0.9777	0.486	0.9386	0.6238
1.11967	0.203706	0.822595	0.425162		97	1.1076	0.9377	1.0223	1.0412	1.2765	0.7925	0.9671	1.0501	1.0161	1.1007	1.541	1.4655	1.2931	1.2192	0.9644		97	0.6097	0.6196	0.945	0.998	0.3665	1.1583	0.5469	0.7887	0.4615	0.567	2.0013	1.7056	0.6958	0.6296	0.5058	0.9909	0.4769	0.9452	0.617
1.1192	0.219084	0.832105	0.429893		98	1.0178	0.9193	0.9961	1.0861	1.2755	0.856	1.0335	0.9991	1.038	1.0968	1.5471	1.586	1.2475	1.2094	0.8798		98	0.6074	0.6322	0.9185	1.0403	0.3713	1.1918	0.5565	0.7891	0.4764	0.5658	2.0101	1.7386	0.7026	0.6556	0.5131	1.0024	0.4799	0.9382	0.6202
1.13511	0.203087	0.827132	0.431883		99	1.0175	0.8923	1.0084	1.0869	1.2719	0.8209	1.1701	1.1324	1.0513	1.1607	1.4807	1.5412	1.3078	1.1617	0.9229		99	0.6032	0.6118	0.8979	0.9951	0.3724	1.1714	0.5612	0.7893	0.4774	0.5651	2.0013	1.7781	0.6967	0.6704	0.5159	0.9955	0.4693	0.938	0.6055
1.10334	0.212638	0.827563	0.43323		100	0.9504	0.9248	0.9316	1.0012	1.2884	0.7947	1.1184	1.1521	1.1968	1.0744	1.4358	1.5652	1.1681	1.1058	0.8424		100	0.6014	0.6246	0.8923	0.9641	0.3766	1.1475	0.5808	0.7901	0.4879	0.5574	2.0363	1.7751	0.6667	0.6882	0.5273	0.9944	0.4769	0.9333	0.6028
1.11132	0.220684	0.837568	0.438611		101	1.0216	0.9379	0.9352	1.0106	1.3509	0.7829	1.1024	1.1274	1.1397	1.0823	1.4008	1.6424	1.2234	1.0222	0.8901		101	0.6252	0.6483	0.9197	0.9913	0.3757	1.1579	0.5713	0.7931	0.4992	0.5598	2.0374	1.8202	0.6899	0.7022	0.5384	0.9851	0.4627	0.9476	0.5888
1.08799	0.195585	0.837826	0.447598		102	0.9119	0.911	0.8684	1.0067	1.1779	0.8578	1.1718	1.2018	1.0901	1.2408	1.4583	1.4302	1.1423	0.9697	0.8811		102	0.6042	0.5975	0.9214	0.9501	0.3746	1.1604	0.5872	0.7859	0.5337	0.5569	2.1004	1.8281	0.719	0.7075	0.5587	0.9744	0.4672	0.9218	0.5697
1.10665	0.226152	0.842126	0.444973		103	0.9279	0.9634	0.8533	0.8895	1.3176	0.8632	1.2229	1.1647	1.1101	1.2461	1.418	1.5449	1.2651	1.0012	0.8119		103	0.5797	0.6195	0.9427	0.9612	0.3766	1.1629	0.6045	0.7923	0.5613	0.5582	2.0533	1.8733	0.703	0.6996	0.5565	0.9737	0.4673	0.93	0.5848
1.11071	0.216045	0.852853	0.434148		104	0.8864	0.9448	0.8428	1.0172	1.1647	0.8287	1.2356	1.2614	1.1633	1.1219	1.4574	1.4922	1.3198	1.0568	0.8676		104	0.6121	0.6427	0.9545	0.978	0.387	1.1712	0.6222	0.7931	0.6305	0.5607	2.0162	1.8686	0.6995	0.6879	0.567	0.996	0.4851	0.948	0.5839
1.104	0.198528	0.861084	0.444901		105	0.9531	0.898	0.9512	1.0436	1.1395	0.8212	1.1917	1.1797	1.0862	1.1865	1.4378	1.4879	1.3039	0.9906	0.8891		105	0.6145	0.6185	0.9845	1.0687	0.3885	1.1605	0.6254	0.7991	0.6908	0.5653	2.0586	1.89	0.6741	0.6991	0.5791	0.9759	0.4666	0.937	0.5644
1.10126	0.228236	0.875674	0.450271		106	0.8451	0.9289	0.9987	1.0876	1.1098	0.8068	1.2754	1.1208	1.1278	1.2301	1.5826	1.4697	1.2021	0.8876	0.8459		106	0.6104	0.5993	0.9765	1.15	0.4024	1.1614	0.6563	0.8	0.7637	0.5469	2.0767	1.9128	0.7042	0.7212	0.605	0.9972	0.4677	0.9381	0.548
1.11123	0.273665	0.902253	0.465124		107	0.8771	0.9147	0.9388	1.0061	1.0332	0.7968	1.3055	1.2019	1.073	1.1764	1.7708	1.5066	1.3108	0.9734	0.7834		107	0.6059	0.659	1.0062	1.2371	0.4077	1.1726	0.645	0.8028	0.8484	0.5458	2.117	2.0023	0.7664	0.7267	0.6278	0.9852	0.4793	0.9275	0.5801
1.10603	0.233099	0.906995	0.461378		108	0.8728	0.856	0.9053	0.9728	1.084	0.8183	1.2744	1.1993	1.1156	1.23	1.624	1.3487	1.3524	1.0785	0.8584		108	0.5948	0.6227	0.9905	1.2985	0.4108	1.1722	0.6596	0.8034	0.9306	0.5487	2.0925	1.9875	0.7957	0.7242	0.6375	0.9652	0.4851	0.9267	0.5867
1.08675	0.204699	0.921553	0.460317		109	0.9066	0.8457	0.859	1.0374	1.0382	0.8319	1.1858	1.0619	1.1274	1.2223	1.518	1.3697	1.3083	1.0716	0.9175		109	0.5933	0.6163	1.009	1.3275	0.421	1.1637	0.69	0.8014	1.0752	0.544	2.0824	1.9845	0.8164	0.7569	0.6573	0.9706	0.4975	0.9405	0.562
1.07347	0.231376	0.937811	0.464162		110	0.8833	0.8532	0.8305	1.0242	1.0195	0.8051	1.1373	1.0866	1.0561	1.2533	1.6158	1.2962	1.3619	1.0593	0.8197		110	0.604	0.6587	1.0194	1.3179	0.4333	1.184	0.6775	0.8004	1.1994	0.5466	2.103	1.9988	0.8189	0.7532	0.6875	1.0123	0.4959	0.9143	0.5933
