# Supplementary material for: Hypoxia controls plasma membrane targeting of polarity proteins by dynamic turnover of PI4P and PI(4,5)P2
Source: eLife. 2022 Jun 9;11:e79582. doi: 10.7554/eLife.79582 (PMC9242647; doi:10.7554/eLife.79582)
Supplement: Figure 7—source data 2. [file elife-79582-fig7-data2.xlsx]

## Sheet: Figure 7B
Figure 7 Souce Data 2
PLC-PH::GFP		MaLionR				1	2	3	4	5	6	7	8	9	10	11	12	13			1	2	3	4	5	6	7	8	9	10	11	12	13	14	15	16	17	18	19	20	21	22	23	24
AVG	STDEV	AVG	STDEV
C1_PM/roi	C1_PM/roi	C2_Cy/t	C2_Cy/t		min	t_C1_PM/Cy	t_C1_PM/Cy	t_C1_PM/Cy	t_C1_PM/Cy	t_C1_PM/Cy	t_C1_PM/Cy	t_C1_PM/Cy	t_C1_PM/Cy	t_C1_PM/Cy	t_C1_PM/Cy	t_C1_PM/Cy	t_C1_PM/Cy			min	t_C2_Cy	t_C2_Cy	t_C2_Cy	t_C2_Cy	t_C2_Cy	t_C2_Cy
0.983892	0.045744	1.0093	0.0174226		0	0.9805	0.9903	1.012	1.0153	0.9552	1.0055	0.9953	0.9917	0.8493	1.0198	0.9986	0.9932			0	0.9889	1.0019	1.0161	1.0316	0.9928	1.0245
0.989175	0.0263991	0.9917	0.0130999		1.5	0.9765	1.017	1.0215	0.9951	0.9824	0.9702	0.9848	1.0357	0.9377	0.9933	0.9864	0.9695			1.5	0.9841	0.9926	0.9866	1.009	0.9738	1.0041
1.00116	0.0207034	0.9786	0.00935393		3	1.0562	1.0052	0.9918	0.9831	1.0026	0.9899	1.0068	0.9801	1.0109	0.985	1.0133	0.989			3	0.9907	0.968	0.9843	0.9851	0.9695	0.974
1.01607	0.0256536	1.00302	0.013575		4.5	1.013	1.0104	0.9971	1.0089	1.0412	1.0432	1.0219	0.9851	1.0732	1.01	0.9847	1.0042			4.5	0.9968	1.019	0.999	0.996	1.0204	0.9869
1.00967	0.0426996	1.01742	0.0235056		6	0.9738	0.977	0.9776	0.9976	1.0185	0.9913	0.9912	1.0074	1.1289	0.9918	1.0169	1.044			6	1.0396	1.0185	1.0141	0.9783	1.0435	1.0105
1.02585	0.0633023	1.0308	0.022741		7.5	0.9816	1.0009	1.0676	1.0252	0.9869	0.9775	0.9737	0.9772	1.1924	1.0149	1.0325	1.0798			7.5	1.0309	1.0468	1.0375	0.9857	1.043	1.0409
1.04299	0.0540973	1.04817	0.0276932		9	1.0918	1.014	1.0903	1.0575	0.9886	1.0289	1.0121	1.0109	1.1525	0.9679	1.0081	1.0933			9	1.0588	1.0535	1.0447	0.9957	1.0762	1.0601
1.03924	0.0805893	1.03838	0.0350426		10.5	1.1293	1.0372	1.0932	0.9906	1.0322	1.0097	1.0115	0.9665	1.2124	0.9299	0.9624	1.096			10.5	1.0598	1.0484	1.0463	0.97	1.0674	1.0384
1.03408	0.0744004	1.04483	0.0474558		12	1.0463	1.0648	1.1239	1.0957	1.055	0.9528	1.0341	0.978	1.1364	0.9692	0.8858	1.0669			12	1.0488	1.0447	1.0529	0.9657	1.1149	1.042
1.00325	0.0727708	1.02238	0.0470096		13.5	0.9381	1.0667	1.078	1.0796	1.0678	0.9664	1.0161	0.9346	1.0553	0.9229	0.8711	1.0424			13.5	1.0229	1.015	1.0285	0.9431	1.0895	1.0353
1.00192	0.0757289	1.0343	0.0550728		15	0.9292	1.0739	1.1359	1.0482	1.0532	0.9758	1.0144	0.9188	1.009	0.9583	0.8653	1.041			15	1.0314	1.0471	1.0409	0.9516	1.1218	1.013
1.00301	0.0797769	1.03635	0.0557854		16.5	0.9093	1.0362	1.1282	1.1065	1.0389	0.946	1.0472	0.8599	1.0256	0.9601	0.9442	1.034			16.5	1.0415	1.0378	1.0615	0.9433	1.1137	1.0203
0.987017	0.0864264	1.02007	0.0490975		18	0.8395	1.0516	1.0948	1.0486	1.068	0.916	1.0487	0.8535	1.02	1	0.9079	0.9956			18	1.0227	1.0304	1.0407	0.9464	1.0915	0.9887
0.985558	0.0776521	1.02667	0.0548874		19.5	0.8855	1.0426	1.0639	1.0897	1.0133	0.8737	1.0579	0.9091	1.0067	0.9443	0.9026	1.0374			19.5	1.0312	1.0411	1.0662	0.9422	1.0935	0.9858
0.969917	0.0840944	1.02683	0.0563759		21	0.9133	0.9978	1.0567	1.1113	0.961	0.861	0.9982	0.861	1.007	0.879	0.9234	1.0693			21	1.0372	1.0352	1.0664	0.9408	1.0971	0.9843
0.9599	0.0648972	1.03733	0.0614199		22.5	0.9058	1.0423	1.0204	1.0558	0.9387	0.8606	0.9669	0.8983	0.9963	0.8809	0.9491	1.0037			22.5	1.0199	1.0532	1.0923	0.9508	1.1141	0.9937
0.964942	0.0710877	1.05442	0.0708603		24	0.9233	1.0817	1.0052	1.0247	0.9312	0.876	0.9933	0.9414	0.9916	0.8573	0.8992	1.0544			24	1.0634	1.0604	1.1082	0.9551	1.1464	0.993
0.961192	0.0797661	1.05132	0.0704738		25.5	0.9417	1.0636	0.9696	1.1023	0.8874	0.895	0.9458	0.924	0.9475	0.8531	0.9232	1.0811			25.5	1.044	1.0796	1.116	0.9486	1.1273	0.9924
0.965942	0.081827	1.05173	0.0761479		27	0.9119	1.107	0.9331	1.1086	0.8836	0.8901	1.0068	0.9918	0.9342	0.9622	0.8566	1.0054			27	1.0691	1.0829	1.1145	0.9392	1.1269	0.9778
0.96515	0.0858197	1.05788	0.087451		28.5	0.9288	1.1781	0.9422	1.0935	0.9405	0.9022	0.9159	0.9492	0.9627	0.8998	0.8901	0.9788			28.5	1.0827	1.1076	1.1235	0.9328	1.1372	0.9635
0.969233	0.0679284	1.07245	0.101014		30	0.9871	1.1262	0.9672	1.0553	0.8797	0.9094	0.9453	0.9446	0.9892	0.9132	0.9271	0.9865			30	1.1021	1.1156	1.1472	0.9235	1.1744	0.9719
0.977075	0.0870085	1.07585	0.0975319		31.5	1.0046	1.1445	0.9733	1.11	0.9541	0.8568	0.9242	0.966	0.9955	0.8437	0.9566	0.9956			31.5	1.0945	1.1256	1.1535	0.9403	1.1713	0.9699
0.972742	0.0832769	1.0814	0.109073		33	1.0317	1.1294	0.914	1.0978	0.8914	0.8514	0.9729	0.9661	0.99	0.8962	0.9382	0.9938			33	1.0894	1.1515	1.1484	0.9369	1.2018	0.9604
0.991267	0.0708503	1.10208	0.113245		34.5	1.0394	1.1451	0.9825	1.0618	0.9321	0.8643	0.9632	0.9843	0.9816	1.0207	0.9398	0.9804			34.5	1.1182	1.184	1.1624	0.9574	1.2227	0.9678
0.991467	0.0783914	1.09952	0.122271		36	1.0451	1.1427	1.0276	1.079	0.8702	0.8748	0.9561	0.976	1.0053	0.997	0.9854	0.9384			36	1.1313	1.1693	1.1738	0.9431	1.2289	0.9507
0.967917	0.0821905	1.1096	0.131502		37.5	0.9588	1.1189	1.0703	1.05	0.8562	0.8323	0.9375	0.9383	0.9361	0.977	0.9845	0.9551			37.5	1.1163	1.1812	1.2032	0.9526	1.2567	0.9476
0.974583	0.0891718	1.11153	0.125831		39	1.0062	1.152	1.0295	1.0773	0.8659	0.8298	0.9453	0.9086	0.9534	1.0094	0.9335	0.9841			39	1.1067	1.1748	1.2071	0.9637	1.257	0.9599
0.969833	0.063642	1.11748	0.136351		40.5	0.9708	1.0659	1.0173	1.0032	0.9323	0.8028	0.9836	0.9948	0.9401	0.952	0.9886	0.9866			40.5	1.1199	1.1732	1.2551	0.9549	1.2491	0.9527
0.967175	0.0973675	1.11098	0.139175		42	0.9598	1.1572	1.0419	0.9858	0.9464	0.8119	0.954	0.9771	0.9798	0.7864	0.9714	1.0344			42	1.1115	1.2026	1.2395	0.925	1.2292	0.9581
0.967392	0.0899236	1.12757	0.161411		43.5	0.956	1.1068	1.0446	1.0357	0.9889	0.7658	0.9595	0.9132	1.0417	0.8721	0.9625	0.9619			43.5	1.1239	1.2169	1.2878	0.9287	1.2713	0.9368
0.959342	0.0797788	1.14033	0.155778		45	0.9662	1.1113	0.9967	1.0141	0.9429	0.7571	0.976	0.9462	0.9642	0.9554	0.9325	0.9495			45	1.1436	1.2256	1.2866	0.9506	1.2846	0.951
0.957008	0.0893085	1.14925	0.164532		46.5	0.9688	1.0995	0.9899	1.0197	0.9759	0.7412	0.9364	1.0008	0.9312	0.9083	0.8856	1.0268			46.5	1.1577	1.2564	1.2864	0.9492	1.3012	0.9446
0.976517	0.103586	1.14635	0.157988		48	0.9596	1.0943	1.0216	1.0753	0.9318	0.7232	0.9335	1.0971	0.9846	0.9432	0.9124	1.0416			48	1.1457	1.2539	1.2904	0.962	1.2808	0.9453
0.958042	0.0921695	1.15168	0.170106		49.5	0.9722	1.0868	0.9864	1.0392	0.9325	0.7949	0.9464	1.0136	0.9812	0.7763	0.9392	1.0278			49.5	1.1505	1.2535	1.2766	0.984	1.3336	0.9119
0.961975	0.0959485	1.16802	0.162438		51	1.0002	1.0941	0.9735	1.0339	0.9235	0.7913	0.9579	0.994	0.9689	0.7949	0.9233	1.0882			51	1.143	1.2823	1.2921	1.0221	1.3334	0.9352
0.957692	0.102582	1.1806	0.176189		52.5	1.0091	1.0504	1.0669	0.9241	0.9393	0.8353	0.9438	0.9809	0.9132	0.7798	0.8967	1.1528			52.5	1.1508	1.2729	1.3345	0.9999	1.3735	0.952
0.979558	0.0853406	1.17985	0.177429		54	0.9938	1.0598	1.0804	0.9172	0.9235	0.8874	0.9709	0.9941	0.9583	0.9082	0.895	1.1661			54	1.1522	1.2787	1.328	0.9842	1.3758	0.9602
0.974117	0.0839225	1.17342	0.176979		55.5	0.9764	1.0542	1.0879	0.9498	0.8657	0.8978	0.9749	1.0742	0.949	0.8656	0.9062	1.0877			55.5	1.1608	1.2787	1.3377	0.9803	1.3403	0.9427
0.965742	0.0931933	1.1827	0.193222		57	0.9469	1.0746	1.0627	0.922	0.8914	0.9429	0.9372	0.9868	0.9245	0.8473	0.882	1.1706			57	1.1727	1.3016	1.3379	0.9629	1.3831	0.938
0.955917	0.103498	1.18772	0.191446		58.5	0.9241	1.068	1.0121	0.8562	0.8521	0.9396	0.9283	0.9695	0.9387	0.9079	0.8593	1.2152			58.5	1.1759	1.295	1.33	0.9666	1.4056	0.9532
0.963258	0.123364	1.18262	0.188556		60	0.9481	1.0644	0.9661	0.8627	0.8334	0.8984	0.9805	0.9763	0.9633	0.9117	0.8572	1.297			60	1.1834	1.2849	1.3187	0.9617	1.3969	0.9501
0.968208	0.144162	1.17103	0.182676		61.5	0.8802	1.144	0.9571	0.9376	0.8618	0.8939	0.9012	0.9342	0.9288	0.9144	0.9004	1.3649			61.5	1.1754	1.3126	1.3468	0.9305	1.2959	0.965
0.953575	0.141994	1.16832	0.16473		63	0.8745	1.1012	0.8768	0.9734	0.7739	0.9349	0.8444	0.9244	0.956	0.9512	0.9049	1.3273			63	1.2116	1.3073	1.3331	0.9634	1.23	0.9645
0.937842	0.132866	1.16433	0.168475		64.5	0.8985	1.0533	0.9143	0.9339	0.7884	0.8579	0.731	0.9585	1.0442	0.9397	0.8911	1.2433			64.5	1.1983	1.3118	1.3468	0.945	1.2086	0.9755
0.9124	0.150749	1.26843	0.151697		66	0.9293	0.9484	0.9922	0.8936	0.837	0.9101	0.6058	0.8988	0.9479	0.8468	0.861	1.2779			66	1.3272	1.3318	1.5071	1.0844	1.1562	1.2039
0.842883	0.132149	1.12378	0.234106		67.5	0.8797	1.0238	1.0782	0.924	0.8076	0.7533	0.5976	0.9118	0.8281	0.715	0.773	0.8225			67.5	1.1775	1.3675	1.4236	0.8929	0.9138	0.9674
0.895333	0.132694	1.08822	0.216022		69	0.8458	1.0569	1.1402	0.9044	0.7885	0.8404	0.6352	1.0064	0.9303	0.7986	0.9035	0.8938			69	1.1454	1.3498	1.3226	0.8485	0.924	0.939
0.907925	0.102499	1.0813	0.218353		70.5	0.892	1.0823	1.036	0.8991	0.9533	0.8136	0.7411	0.9712	0.975	0.7699	0.8983	0.8633			70.5	1.1152	1.3578	1.3132	0.8359	0.9697	0.896
0.918742	0.131982	1.0623	0.21217		72	0.9612	1.0127	1.1507	0.8251	0.998	0.939	0.6522	0.9631	1.0275	0.8112	0.7999	0.8843			72	1.1174	1.3094	1.3024	0.9225	0.8984	0.8237
0.94665	0.126216	1.08068	0.184269		73.5	0.971	0.9811	1.1736	0.7824	1.0154	0.9439	0.7208	1.0381	0.9693	0.8788	0.8293	1.0561			73.5	1.1465	1.2414	1.2897	0.9447	1.0585	0.8033
0.935083	0.134674	1.07145	0.209077		75	0.9031	0.9907	1.0918	0.7688	0.9684	0.8788	0.6827	1.1748	0.9892	0.8832	0.8675	1.022			75	1.1196	1.1878	1.2791	0.9008	1.2054	0.736
0.925367	0.104713	1.06395	0.222628		76.5	0.8954	0.9351	1.0487	0.8376	0.9583	0.8766	0.8174	1.1604	0.9689	0.8336	0.8057	0.9667			76.5	1.1108	1.1923	1.2801	0.8821	1.2116	0.7068
0.927042	0.106522	1.051	0.227132		78	0.9464	0.9697	1.0012	0.7622	1.0064	0.8764	0.794	1.1307	1.0095	0.8432	0.8391	0.9457			78	1.0953	1.1483	1.2826	0.868	1.2217	0.6901
0.922133	0.114926	1.07585	0.252471		79.5	0.9589	0.9651	1.015	0.7505	0.925	0.9579	0.8218	1.107	1.0375	0.8212	0.7402	0.9655			79.5	1.091	1.1836	1.2886	0.8553	1.3395	0.6971
0.908142	0.133367	1.0666	0.239538		81	0.9703	0.9791	1.0506	0.6488	0.8944	0.963	0.8373	1.0547	0.9846	0.8354	0.6832	0.9963			81	1.0637	1.1617	1.2443	0.8541	1.3537	0.7221
0.905592	0.140038	1.07117	0.233468		82.5	0.9635	0.9783	0.9488	0.7038	0.9241	0.9924	0.892	1.1087	1.029	0.7108	0.6614	0.9543			82.5	1.0797	1.179	1.2526	0.8644	1.3265	0.7248
0.872908	0.138709	1.05628	0.238631		84	0.9884	1.0054	0.8895	0.7337	0.7771	1.0016	0.8422	1.0812	0.9463	0.7371	0.6141	0.8583			84	1.0773	1.1291	1.2079	0.863	1.3598	0.7006
0.887358	0.129837	1.04945	0.217116		85.5	0.9334	0.9895	0.9831	0.7568	0.804	0.9412	0.8475	1.1126	0.9907	0.8012	0.6315	0.8568			85.5	1.0664	1.1512	1.203	0.827	1.2991	0.75
0.870383	0.119146	1.05953	0.206613		87	0.8964	1.0431	0.8998	0.7104	0.7963	0.8759	0.8702	1.061	0.9968	0.7625	0.703	0.8292			87	1.0521	1.1249	1.2036	0.8539	1.3316	0.7911
0.868367	0.0980188	1.06567	0.188156		88.5	0.9065	1.0225	0.9353	0.7545	0.8357	0.9077	0.8343	1.0017	0.9255	0.8274	0.7543	0.715			88.5	1.0424	1.1182	1.191	0.856	1.3304	0.856
0.872117	0.0948603	1.06667	0.193011		90	0.8735	1.0711	0.8948	0.8271	0.7863	0.8521	0.8826	0.9934	0.9137	0.8813	0.746	0.7435			90	1.0372	1.1915	1.1978	0.8242	1.2911	0.8582
0.9007	0.102437	1.05122	0.189324		91.5	0.8291	1.0285	0.8293	0.8663	0.8257	0.8891	0.9705	1.0677	0.8584	1.0527	0.7627	0.8284			91.5	1.006	1.1774	1.1892	0.8297	1.2683	0.8367
0.920742	0.105295	1.06612	0.205324		93	0.833	1.0486	0.9066	0.849	0.8841	0.965	0.9496	1.1285	0.9803	0.9427	0.7488	0.8127			93	1.0314	1.1336	1.18	0.8142	1.3668	0.8707
0.936625	0.118058	1.0607	0.210085		94.5	0.9184	1.061	0.9297	0.8485	0.7032	1.0293	0.9866	1.0776	1.065	0.9696	0.7945	0.8561			94.5	1.0261	1.1151	1.2009	0.8112	1.361	0.8499
0.930167	0.0905375	1.06085	0.209324		96	0.9055	1.0178	0.8415	0.8993	0.7888	1.0471	0.9528	1.0668	0.9489	0.9514	0.7922	0.9499			96	1.0288	1.1668	1.1753	0.7985	1.345	0.8507
0.94305	0.0710232	1.0537	0.204492		97.5	0.9153	0.987	0.863	0.883	0.855	1.017	0.9159	0.9998	0.9538	1.0704	0.8618	0.9946			97.5	1.055	1.1376	1.184	0.794	1.3173	0.8343
0.90955	0.0882977	1.03785	0.169128		99	0.8418	1.0338	0.7737	0.904	0.8341	1.0002	0.9106	1.0371	0.8261	0.9644	0.8368	0.952			99	1.0538	1.1501	1.1389	0.8084	1.2214	0.8545
0.917475	0.101392	1.02338	0.175794		100.5	0.8472	1.0469	0.8303	0.9716	0.7716	1.097	0.8625	0.9075	0.8302	1.0156	0.8556	0.9737			100.5	1.0358	1.1355	1.1666	0.8031	1.1889	0.8104
0.902483	0.0992047	1.00693	0.155715		102	0.8147	1.0755	0.7743	0.8992	0.838	1.0086	0.9012	0.882	0.8293	1.0212	0.7962	0.9896			102	1.0551	1.079	1.1274	0.7973	1.1569	0.8259
0.906008	0.115208	1.0256	0.177052		103.5	0.8781	1.0375	0.6994	0.9962	0.872	1.0666	0.8798	0.8558	0.8208	0.992	0.7613	1.0126			103.5	1.0615	1.1157	1.132	0.7761	1.226	0.8423
0.890008	0.141035	0.986283	0.161637		105	0.9272	0.9631	0.7977	0.9686	0.7863	1.0011	0.7392	0.8373	0.7469	1.1949	0.7297	0.9881			105	1.0475	1.0783	1.1166	0.7672	1.1143	0.7938
0.911383	0.131138	0.967933	0.160621		106.5	0.9669	0.9341	0.8122	0.9349	0.8387	1.1108	0.8122	0.9159	0.823	1.1721	0.7005	0.9153			106.5	1.0354	1.0412	1.0947	0.7561	1.1083	0.7719
0.904342	0.116982	0.952733	0.170712		108	0.8834	0.9755	0.8091	0.8764	0.8707	1.1781	0.8793	0.9243	0.8077	1.0446	0.7386	0.8644			108	1.0087	1.0427	1.0968	0.7676	1.0926	0.708
0.849658	0.125334	0.950333	0.164043		109.5	0.7419	0.9565	0.8118	0.8818	0.9063	1.0975	0.6984	0.908	0.7183	0.964	0.6909	0.8205			109.5	1.0195	1.0393	1.1005	0.7817	1.0553	0.7057
0.845042	0.132956	0.929867	0.202923		111	0.7136	0.9818	0.7958	0.8035	0.7751	0.9304	0.7595	0.9881	0.7467	1.0849	0.6412	0.9199			111	0.9985	1.0299	1.0704	0.6644	1.1316	0.6844
0.842367	0.130656	0.933167	0.201557		112.5	0.7575	0.958	0.789	0.9418	0.8086	0.8083	0.7856	0.9998	0.778	1.0559	0.5699	0.856			112.5	0.9652	0.9982	1.074	0.6654	1.1782	0.718
0.82385	0.12117	0.9595	0.226744		114	0.7811	0.8369	0.8497	0.9581	0.7017	0.6732	0.8215	0.9706	0.7794	0.9878	0.6124	0.9138			114	0.9512	0.9396	1.0994	0.7423	1.3158	0.7087
0.849825	0.126747	0.932533	0.195018		115.5	0.7289	0.7955	0.8192	1.1627	0.7742	0.8685	0.7895	0.9194	0.8408	0.9386	0.6617	0.8989			115.5	0.96	0.8591	1.0914	0.8108	1.2052	0.6687
0.830717	0.0659878	0.9312	0.25622		117	0.719	0.7524	0.8188	0.9458	0.8175	0.8386	0.8272	0.9143	0.865	0.8807	0.7601	0.8292			117	0.9729	0.8183	1.1064	0.8265	1.3004	0.5627
0.84295	0.103598	0.923267	0.303563		118.5	0.7029	0.7337	0.9329	0.9665	0.9123	0.7714	0.8714	0.9012	0.9126	0.9649	0.7082	0.7374			118.5	0.9646	0.7419	1.0937	0.8175	1.3986	0.5233
																				0
																				0
