# Supplementary material for: Hypoxia controls plasma membrane targeting of polarity proteins by dynamic turnover of PI4P and PI(4,5)P2
Source: eLife. 2022 Jun 9;11:e79582. doi: 10.7554/eLife.79582 (PMC9242647; doi:10.7554/eLife.79582)
Supplement: Figure 7—source data 3. [file elife-79582-fig7-data3.xlsx]

## Sheet: Figure 7C
Figure 7 Souce Data 3
						1	2	3	4	5	6	7	8	9	10	11	12	13			1	2	3	4	5	6	7	8	9	10	11	12	13
P4Mx2::GFP		PLC-PH::RFP			P4Mx2::GFP															PLC-PH::RFP
AVG	STDEV	AVG	STDEV
t_C1_PM/roi	t_C1_PM/roi	t_C2_PM/roi	t_C2_PM/roi		min	t_C1_PM/roi	t_C1_PM/roi	t_C1_PM/roi	t_C1_PM/roi	t_C1_PM/roi	t_C1_PM/roi	t_C1_PM/roi	t_C1_PM/roi	t_C1_PM/roi	t_C1_PM/roi	t_C1_PM/roi	t_C1_PM/roi	t_C1_PM/roi		min	t_C2_PM/roi	t_C2_PM/roi	t_C2_PM/roi	t_C2_PM/roi	t_C2_PM/roi	t_C2_PM/roi	t_C2_PM/roi	t_C2_PM/roi	t_C2_PM/roi	t_C2_PM/roi	t_C2_PM/roi	t_C2_PM/roi	t_C2_PM/roi
1.00015	0.0241873	0.999615	0.0306116		1	1.016	0.9565	1.0448	1.001	1.0006	1.0057	1.0266	0.9572	1.004	1.0057	0.9844	0.9998	0.9996		1	1.0331	1.0425	0.9985	1.0088	0.9832	0.9629	1.0121	0.96	0.9955	1.0283	1.0367	0.9821	0.9513
1.0102	0.0262978	0.998746	0.0207107		2	1.0053	1.0107	0.9637	1.0006	1.0001	1.0145	0.9792	1.0068	1.0289	1.0093	1.0607	1.0538	0.999		2	1.0102	0.9699	1.0002	0.9824	1.0043	1.0051	0.9838	0.9866	0.9969	0.9986	1.003	1.0562	0.9865
0.989662	0.0260781	1.00164	0.0339547		3	0.9787	1.0327	0.9916	0.9985	0.9993	0.9798	0.9942	1.036	0.9671	0.985	0.9549	0.9464	1.0014		3	0.9567	0.9876	1.0013	1.0088	1.0125	1.032	1.0041	1.0534	1.0076	0.9731	0.9602	0.9617	1.0623
0.985954	0.0436094	0.975815	0.0522812		4	0.9393	1.0202	0.9981	1.0241	0.986	1.005	0.9785	1.0309	0.9955	1.0541	0.9388	0.9053	0.9416		4	0.8882	1.0659	0.9935	1.0044	0.9964	1.0149	1.0017	0.99	0.9835	0.9783	0.9314	0.8713	0.9661
1.00278	0.050434	0.974615	0.0812807		5	0.9322	1.0435	1.0868	1.0059	1.0037	1.0271	0.9648	1.0642	1.0323	1.0288	0.9503	0.9287	0.9679		5	0.8524	1.1641	1.0188	0.9677	0.9711	1.0321	0.983	1.0207	0.9699	0.9786	0.8774	0.868	0.9662
1.02872	0.0645182	0.966038	0.0894094		6	0.9597	1.1255	1.1326	1.0268	1.0087	1.0254	1.0028	1.0697	1.0833	1.065	0.967	0.9159	0.9909		6	0.8447	1.1923	1.0203	0.9866	0.9416	0.9508	1.0034	0.9876	0.9476	0.9729	0.8957	0.8308	0.9842
1.05173	0.0783248	0.964269	0.0873544		7	0.9696	1.1834	1.1984	1.0507	1.0582	1.0526	0.9766	1.0766	1.091	1.0499	1.0321	0.9151	1.0183		7	0.8304	1.1655	1.0362	0.9857	0.9313	0.9642	0.9649	1.0103	0.963	0.9416	0.9204	0.821	1.001
1.06182	0.103171	0.951392	0.0792031		8	0.9602	1.2516	1.2635	1.0461	1.0824	1.0593	0.9436	1.0467	1.0933	1.0553	1.0367	0.9064	1.0585		8	0.8365	1.1083	1.0385	0.9641	0.936	0.9457	0.9434	0.9634	0.9586	0.9346	0.9104	0.8037	1.0249
1.06198	0.106138	0.9512	0.0794886		9	0.9467	1.2653	1.245	1.0492	1.0971	1.0687	0.9279	1.0638	1.0798	1.0452	1.0513	0.898	1.0677		9	0.841	1.1047	1.033	0.9648	0.9374	0.9411	0.9194	0.9733	0.9762	0.9196	0.8946	0.8168	1.0437
1.06425	0.100988	0.946138	0.0745839		10	0.9455	1.2569	1.2407	1.0539	1.131	1.0706	0.938	1.0545	1.0871	1.0604	1.0282	0.9355	1.0329		10	0.8195	1.0934	1.0229	0.9686	0.9586	0.927	0.9176	0.9699	0.9687	0.9148	0.8794	0.8453	1.0141
1.04622	0.112943	0.935431	0.0871739		11	0.9336	1.2532	1.2263	1.0311	1.1236	1.0842	0.9319	1.04	1.0602	1.0582	0.989	0.8456	1.024		11	0.8035	1.0818	1.0483	0.9501	0.9456	0.9306	0.904	0.9639	0.9595	0.9135	0.8316	0.8029	1.0253
1.03591	0.110639	0.932838	0.086411		12	0.9407	1.2549	1.1995	1.0096	1.1089	1.065	0.9351	1.0317	1.0509	1.0571	0.992	0.8329	0.9885		12	0.8153	1.0766	1.052	0.9511	0.9355	0.9215	0.9055	0.9632	0.9724	0.9056	0.8325	0.7884	1.0073
1.02584	0.115135	0.926454	0.089771		13	0.9606	1.2432	1.2047	0.9912	1.1226	1.0562	0.9242	1.017	1.0289	1.0324	0.9811	0.8062	0.9676		13	0.8113	1.085	1.0337	0.9429	0.9431	0.9072	0.8871	0.9534	0.9717	0.891	0.8308	0.773	1.0137
1.00914	0.116273	0.9233	0.0987909		14	0.9408	1.2262	1.1715	0.949	1.1255	1.0502	0.9252	0.9944	1.0115	1.0339	0.9644	0.7834	0.9428		14	0.8103	1.0929	1.0547	0.9325	0.943	0.9169	0.8788	0.9531	0.9687	0.8952	0.8013	0.7492	1.0063
1.00326	0.112209	0.926662	0.103178		15	0.9486	1.2114	1.157	0.9365	1.1195	1.0346	0.928	0.9937	0.9983	1.0515	0.9397	0.791	0.9326		15	0.7963	1.1297	1.0495	0.9258	0.916	0.9206	0.888	0.9592	0.9852	0.9111	0.7973	0.7663	1.0016
0.988377	0.111168	0.925385	0.107448		16	0.9508	1.1828	1.14	0.9177	1.1262	1.0135	0.9347	0.9701	0.9663	1.0425	0.9224	0.7817	0.9002		16	0.8002	1.1568	1.0492	0.9215	0.9222	0.9097	0.8927	0.9443	0.9779	0.9163	0.7821	0.7678	0.9893
0.973908	0.114007	0.918377	0.112125		17	0.9587	1.1484	1.1251	0.8945	1.118	0.9965	0.8869	0.9884	0.961	1.0465	0.9045	0.7568	0.8755		17	0.7823	1.1561	1.0339	0.9073	0.9191	0.9079	0.8466	0.9583	0.9853	0.9183	0.7756	0.7585	0.9897
0.968423	0.1161	0.916346	0.114234		18	0.9482	1.141	1.1349	0.8699	1.1331	0.983	0.9036	0.9833	0.9364	1.0307	0.8905	0.7635	0.8714		18	0.776	1.1684	1.0276	0.9062	0.9098	0.9008	0.8637	0.9555	0.9816	0.9135	0.7652	0.7597	0.9845
0.950585	0.116552	0.903785	0.114532		19	0.9473	1.1275	1.0883	0.8553	1.1072	0.9643	0.8993	0.9717	0.9235	1.0346	0.8757	0.7302	0.8327		19	0.7719	1.1561	0.9889	0.8922	0.8885	0.9022	0.8638	0.9441	0.9774	0.9166	0.7584	0.7185	0.9706
0.940731	0.116407	0.900854	0.117122		20	0.9285	1.1167	1.0616	0.8612	1.0961	0.9551	0.899	0.9575	0.9259	1.0356	0.8718	0.7099	0.8106		20	0.7815	1.1648	0.9659	0.9038	0.8907	0.8911	0.8635	0.9171	0.9829	0.9271	0.7733	0.6845	0.9649
0.9307	0.115019	0.889115	0.121358		21	0.9281	1.1008	1.0646	0.8324	1.0639	0.9565	0.9001	0.956	0.9067	1.0285	0.8466	0.7075	0.8074		21	0.77	1.1749	0.9401	0.8689	0.8563	0.8904	0.8589	0.8957	0.9824	0.9235	0.7537	0.683	0.9607
0.925	0.122957	0.884869	0.127837		22	0.9261	1.076	1.0673	0.8374	1.094	0.9495	0.8801	0.9578	0.896	1.0325	0.8389	0.679	0.7904		22	0.7642	1.1855	0.9277	0.8688	0.8604	0.8914	0.8574	0.8853	0.993	0.9212	0.7508	0.6541	0.9435
0.911177	0.1259	0.874838	0.13463		23	0.9065	1.0657	1.0524	0.8337	1.0765	0.9394	0.8662	0.9432	0.8972	1.0221	0.8288	0.6504	0.7632		23	0.7608	1.1958	0.9042	0.8426	0.8352	0.8778	0.8539	0.8624	0.9993	0.922	0.7452	0.6329	0.9408
0.899746	0.125338	0.863085	0.12909		24	0.9228	1.0311	1.0549	0.8263	1.0598	0.9282	0.864	0.9253	0.8875	1.001	0.8213	0.6323	0.7422		24	0.7601	1.1693	0.8762	0.8351	0.8366	0.8821	0.8405	0.8482	0.9708	0.9085	0.749	0.6145	0.9292
0.892623	0.127549	0.853185	0.133498		25	0.9214	1.0391	1.0493	0.8315	1.0509	0.9331	0.8491	0.9111	0.8877	0.9818	0.8024	0.6318	0.7149		25	0.7502	1.1684	0.8703	0.8201	0.8081	0.8768	0.8344	0.8304	0.9892	0.8957	0.73	0.6076	0.9102
0.881531	0.121724	0.845338	0.136107		26	0.9196	1.0117	1.0254	0.8242	1.0147	0.9329	0.8549	0.9096	0.8709	0.9632	0.8016	0.6059	0.7253		26	0.764	1.1659	0.8378	0.8166	0.7903	0.8671	0.834	0.8212	0.9764	0.8873	0.7251	0.5831	0.9206
0.875077	0.129298	0.8409	0.135813		27	0.9289	0.9873	1.0253	0.8243	1.0175	0.9376	0.8527	0.8991	0.8918	0.9511	0.7921	0.5809	0.6874		27	0.7556	1.1443	0.8305	0.8039	0.785	0.8764	0.835	0.808	0.9987	0.8849	0.7182	0.5798	0.9114
0.858062	0.124837	0.823785	0.129644		28	0.9221	0.9715	0.9832	0.8043	0.9942	0.9124	0.8516	0.8846	0.8806	0.9266	0.7786	0.5642	0.6809		28	0.7431	1.1117	0.7951	0.787	0.7765	0.8615	0.826	0.7852	0.9789	0.8658	0.7037	0.5796	0.8951
0.846746	0.12051	0.813962	0.125263		29	0.9147	0.9261	0.9662	0.8003	0.9779	0.9179	0.8623	0.8643	0.8721	0.9108	0.7645	0.563	0.6676		29	0.7416	1.0692	0.778	0.7835	0.7504	0.8669	0.8374	0.7676	0.9686	0.8506	0.686	0.5768	0.9049
0.839831	0.121252	0.8048	0.123568		30	0.9152	0.9136	0.9507	0.7969	0.9856	0.8966	0.8621	0.8578	0.8559	0.9064	0.7647	0.5499	0.6624		30	0.7315	1.0566	0.7714	0.7697	0.7511	0.8442	0.8353	0.7532	0.9659	0.8396	0.6779	0.5741	0.8919
0.832838	0.124108	0.791877	0.128298		31	0.9019	0.8999	0.9265	0.7946	0.9974	0.8854	0.8494	0.8461	0.8879	0.8984	0.7503	0.534	0.6551		31	0.7309	1.0266	0.7568	0.7704	0.7351	0.8246	0.8137	0.7342	0.9837	0.8421	0.6506	0.5438	0.8819
0.825838	0.117048	0.780431	0.118166		32	0.9064	0.8812	0.9059	0.799	0.9751	0.8922	0.8385	0.838	0.857	0.9152	0.6932	0.5578	0.6764		32	0.7176	0.9873	0.7437	0.763	0.7165	0.8376	0.8086	0.7205	0.9365	0.844	0.6189	0.5725	0.8789
0.817785	0.114499	0.774938	0.124585		33	0.8973	0.8624	0.8645	0.7882	0.9586	0.8734	0.844	0.8352	0.8889	0.9157	0.6652	0.5689	0.6689		33	0.7165	0.972	0.7076	0.7516	0.7084	0.8291	0.8069	0.7059	0.9841	0.8395	0.5942	0.586	0.8724
0.812008	0.108853	0.767938	0.122077		34	0.8772	0.837	0.8464	0.786	0.9436	0.8739	0.854	0.8214	0.8773	0.92	0.664	0.57	0.6853		34	0.7169	0.9364	0.7169	0.7548	0.6911	0.8323	0.8159	0.6936	0.9659	0.8383	0.5735	0.58	0.8676
0.8061	0.111617	0.757969	0.128799		35	0.8853	0.8211	0.814	0.7832	0.9443	0.8636	0.8453	0.8094	0.8867	0.9274	0.6426	0.5681	0.6883		35	0.7033	0.9328	0.703	0.7375	0.6746	0.8288	0.8015	0.6685	0.9735	0.8334	0.5502	0.5775	0.869
0.796054	0.106009	0.748254	0.123603		36	0.8825	0.8009	0.807	0.771	0.9263	0.8364	0.8387	0.8013	0.8683	0.917	0.6411	0.5718	0.6864		36	0.7054	0.9069	0.689	0.7365	0.67	0.815	0.7875	0.6568	0.9672	0.8227	0.5475	0.5778	0.845
0.785946	0.105359	0.740346	0.126662		37	0.8812	0.7842	0.772	0.775	0.9056	0.8216	0.8245	0.7847	0.8677	0.9225	0.6222	0.5794	0.6767		37	0.7028	0.8989	0.6598	0.7341	0.6592	0.8046	0.774	0.6388	0.9652	0.8291	0.5316	0.5832	0.8432
0.770508	0.114058	0.726915	0.12102		38	0.8853	0.6331	0.7371	0.7758	0.9106	0.8242	0.8233	0.7804	0.8612	0.9145	0.614	0.5852	0.6719		38	0.6938	0.8264	0.6433	0.7386	0.6529	0.8128	0.7713	0.612	0.9423	0.8185	0.5237	0.5792	0.8351
0.7604	0.115504	0.720354	0.123715		39	0.867	0.6092	0.7282	0.7655	0.8788	0.8275	0.8184	0.7657	0.8631	0.9187	0.6031	0.5805	0.6595		39	0.7028	0.8193	0.6277	0.7266	0.6232	0.8225	0.761	0.608	0.9509	0.8191	0.5229	0.5739	0.8067
0.754592	0.117333	0.713069	0.128157		40	0.8706	0.6049	0.7056	0.7698	0.8675	0.8022	0.8181	0.7451	0.8817	0.9145	0.5955	0.5802	0.654		40	0.6973	0.818	0.6025	0.7239	0.6317	0.812	0.7618	0.5859	0.9577	0.8052	0.5088	0.5672	0.7979
0.746162	0.111879	0.704715	0.126924		41	0.8526	0.5925	0.6956	0.7573	0.8382	0.7843	0.8146	0.7507	0.8469	0.9214	0.5733	0.597	0.6757		41	0.677	0.8054	0.5885	0.7192	0.6117	0.7977	0.7531	0.5846	0.9425	0.807	0.4945	0.5828	0.7973
0.738508	0.120843	0.6971	0.131698		42	0.8727	0.57	0.6881	0.7581	0.8243	0.784	0.8147	0.722	0.8699	0.9063	0.5636	0.574	0.6529		42	0.6851	0.7916	0.5684	0.7077	0.6027	0.8169	0.7499	0.5601	0.9507	0.7898	0.4958	0.5649	0.7787
0.737431	0.124213	0.697162	0.132061		43	0.8734	0.5663	0.6816	0.7556	0.8266	0.776	0.8237	0.7135	0.8672	0.9175	0.5465	0.5815	0.6572		43	0.6862	0.7865	0.5649	0.6973	0.6083	0.8104	0.7516	0.5647	0.9576	0.795	0.4902	0.5721	0.7783
0.727877	0.125916	0.686246	0.129196		44	0.8768	0.5418	0.6572	0.7504	0.8015	0.7812	0.8117	0.6928	0.8544	0.9101	0.5256	0.5984	0.6605		44	0.6856	0.7636	0.5655	0.6935	0.5901	0.8074	0.7424	0.5406	0.9344	0.7902	0.4782	0.5788	0.7509
0.724231	0.128364	0.6814	0.132804		45	0.8586	0.5312	0.6518	0.7577	0.7914	0.7723	0.8042	0.6999	0.8692	0.9131	0.5133	0.596	0.6563		45	0.6887	0.7429	0.54	0.6938	0.5908	0.8071	0.7309	0.5444	0.9508	0.7911	0.4723	0.5738	0.7316
0.712446	0.134505	0.672646	0.134847		46	0.8652	0.522	0.6492	0.7496	0.775	0.7641	0.807	0.6769	0.8427	0.9168	0.4866	0.5734	0.6333		46	0.6845	0.7256	0.5245	0.6817	0.5956	0.7931	0.7335	0.5335	0.9503	0.7824	0.4576	0.5625	0.7196
0.710292	0.134354	0.664846	0.133365		47	0.8485	0.5217	0.6366	0.7542	0.7656	0.7533	0.8115	0.6728	0.8437	0.9248	0.4769	0.5969	0.6273		47	0.6741	0.7393	0.5074	0.668	0.5755	0.7913	0.7288	0.5293	0.9235	0.7831	0.4545	0.565	0.7032
0.731354	0.137838	0.6674	0.141522		48	0.8385	0.5452	0.647	0.7364	0.8089	0.7931	0.8655	0.6918	0.8588	0.9578	0.4928	0.5993	0.6725		48	0.655	0.7316	0.5057	0.6441	0.5794	0.811	0.7689	0.5193	0.9365	0.8005	0.4521	0.5642	0.7079
0.766192	0.132547	0.674054	0.133806		49	0.8644	0.6661	0.7839	0.7838	0.8326	0.7987	0.9049	0.6988	0.8705	0.9772	0.5051	0.59	0.6845		49	0.6843	0.8059	0.6022	0.6529	0.5766	0.7913	0.7807	0.5186	0.9213	0.7703	0.4528	0.5611	0.6447
0.763769	0.133233	0.666454	0.130381		50	0.8657	0.6875	0.7819	0.764	0.8329	0.7871	0.9208	0.6866	0.8574	0.9779	0.5112	0.5767	0.6793		50	0.6876	0.8015	0.6119	0.628	0.5753	0.7848	0.7852	0.5241	0.8952	0.7595	0.4541	0.5425	0.6142
0.760769	0.130159	0.661415	0.133466		51	0.8502	0.6938	0.7845	0.7783	0.8347	0.8007	0.9192	0.6807	0.8379	0.9548	0.4951	0.5912	0.6689		51	0.673	0.7898	0.6015	0.634	0.5773	0.8032	0.7827	0.5204	0.9016	0.7387	0.4378	0.5559	0.5825
0.757615	0.13235	0.653308	0.128312		52	0.8622	0.6979	0.7971	0.774	0.8522	0.7893	0.9055	0.6595	0.8407	0.9447	0.4949	0.592	0.639		52	0.6777	0.7866	0.6056	0.6329	0.5749	0.7855	0.7681	0.5131	0.8779	0.7222	0.442	0.5434	0.5631
0.755762	0.131367	0.650615	0.12577		53	0.8429	0.7278	0.8224	0.7842	0.8867	0.7794	0.8865	0.6679	0.8256	0.9194	0.5048	0.5735	0.6038		53	0.6575	0.777	0.6157	0.6528	0.576	0.7746	0.7647	0.5191	0.886	0.6974	0.4487	0.5314	0.5571
0.752423	0.132067	0.643392	0.126725		54	0.8429	0.764	0.8178	0.7888	0.8823	0.7845	0.8728	0.663	0.8099	0.9084	0.5024	0.573	0.5717		54	0.6454	0.7704	0.6173	0.6507	0.5763	0.7783	0.7454	0.5151	0.8816	0.6846	0.4376	0.5242	0.5372
0.764815	0.139003	0.643792	0.126344		55	0.8373	0.7977	0.8481	0.8202	0.9424	0.7713	0.8712	0.6668	0.8289	0.9048	0.5101	0.5732	0.5706		55	0.6415	0.7584	0.6073	0.6702	0.5996	0.7715	0.7613	0.5195	0.8828	0.6643	0.4282	0.5325	0.5322
0.779285	0.148567	0.641408	0.130759		56	0.8202	0.876	0.9279	0.8338	0.9775	0.7854	0.8542	0.671	0.8291	0.897	0.5183	0.5799	0.5604		56	0.6454	0.7619	0.6314	0.6889	0.5919	0.7819	0.7443	0.5161	0.8773	0.6566	0.4145	0.5124	0.5157
0.797354	0.153844	0.642515	0.130494		57	0.8393	0.9303	1.0018	0.8703	0.9761	0.7782	0.8539	0.6835	0.8505	0.8805	0.5572	0.5707	0.5733		57	0.6453	0.77	0.6299	0.706	0.6149	0.776	0.7401	0.529	0.8756	0.6435	0.426	0.4935	0.5029
0.819369	0.159936	0.649523	0.128648		58	0.8309	0.9701	1.1048	0.8809	0.9881	0.7778	0.853	0.6948	0.8726	0.8803	0.59	0.5922	0.6163		58	0.6466	0.7759	0.6638	0.715	0.6181	0.7751	0.7369	0.5414	0.8832	0.6401	0.4347	0.4943	0.5187
0.836054	0.154095	0.6572	0.130412		59	0.8381	1.0026	1.1564	0.8801	0.9628	0.7771	0.8651	0.7045	0.8839	0.8661	0.6196	0.6459	0.6665		59	0.6425	0.7977	0.6814	0.718	0.6206	0.7715	0.7577	0.5391	0.8988	0.6271	0.4418	0.5174	0.53
0.852462	0.159466	0.666877	0.132182		60	0.8355	1.028	1.2116	0.896	0.9659	0.7699	0.8782	0.7367	0.8942	0.872	0.6558	0.6428	0.6954		60	0.6506	0.8353	0.706	0.7096	0.6464	0.7599	0.7788	0.5445	0.9018	0.6291	0.4603	0.5045	0.5426
0.856554	0.157403	0.669369	0.135095		61	0.8227	1.013	1.2406	0.878	0.9521	0.7818	0.8952	0.7504	0.9008	0.8554	0.6916	0.6417	0.7119		61	0.6292	0.8376	0.7325	0.7025	0.6511	0.7736	0.7971	0.5471	0.9026	0.6177	0.4802	0.4906	0.54
0.870677	0.160866	0.679408	0.136384		62	0.8205	1.013	1.2796	0.8923	0.9789	0.7832	0.8892	0.7828	0.9204	0.8494	0.7173	0.6449	0.7473		62	0.6469	0.8534	0.775	0.7027	0.6489	0.7787	0.7871	0.5711	0.9164	0.6169	0.4923	0.4821	0.5608
0.878969	0.170763	0.683215	0.136497		63	0.831	1.0333	1.3114	0.8803	1.0021	0.7888	0.8984	0.7881	0.9253	0.8662	0.722	0.6333	0.7464		63	0.6357	0.8781	0.7954	0.6929	0.6683	0.7628	0.7873	0.574	0.9082	0.6267	0.4961	0.4811	0.5752
0.891031	0.174095	0.691654	0.141591		64	0.8268	1.0815	1.3431	0.8947	0.9818	0.7905	0.8954	0.8093	0.9265	0.861	0.7381	0.6541	0.7806		64	0.634	0.9417	0.8151	0.6987	0.6598	0.7572	0.7911	0.592	0.8977	0.6279	0.5043	0.49	0.582
0.8987	0.176623	0.6961	0.133885		65	0.823	1.0589	1.3623	0.9	1.0175	0.7782	0.9201	0.8093	0.9138	0.8721	0.7451	0.6494	0.8334		65	0.6292	0.931	0.8317	0.7052	0.6855	0.7344	0.805	0.5958	0.8736	0.6332	0.5237	0.4962	0.6048
0.909777	0.184109	0.705446	0.133983		66	0.817	1.0645	1.4092	0.9045	1.0174	0.7804	0.9127	0.8012	0.9301	0.8858	0.7793	0.6547	0.8703		66	0.6337	0.9569	0.8615	0.7134	0.6839	0.7367	0.7908	0.5934	0.8728	0.6372	0.5385	0.5156	0.6364
0.9151	0.191039	0.711854	0.141707		67	0.8281	1.0721	1.4195	0.9541	1.0174	0.7779	0.9128	0.808	0.9232	0.8784	0.7763	0.6179	0.9106		67	0.6374	1.0028	0.8545	0.7386	0.686	0.7249	0.8085	0.5992	0.8616	0.6331	0.5568	0.4834	0.6673
0.916508	0.197073	0.721869	0.148614		68	0.8273	1.0665	1.4334	0.9656	1.0044	0.7645	0.9127	0.8266	0.9446	0.8777	0.7834	0.5893	0.9186		68	0.6626	1.0359	0.8676	0.7626	0.6834	0.7096	0.8106	0.6011	0.8869	0.6361	0.5756	0.4827	0.6696
0.943685	0.203297	0.743531	0.143626		69	0.859	1.0711	1.4771	1.035	1.0106	0.7912	0.9065	0.8698	0.9388	0.8927	0.7818	0.6119	1.0224		69	0.6924	1.062	0.8654	0.8108	0.6896	0.7251	0.8065	0.6374	0.8791	0.6388	0.5969	0.5096	0.7523
0.956762	0.206297	0.756469	0.146639		70	0.8602	1.1202	1.4706	1.0408	1.0582	0.7916	0.9226	0.8823	0.9266	0.896	0.7673	0.6313	1.0702		70	0.6937	1.0868	0.8538	0.837	0.6921	0.7115	0.8265	0.656	0.8834	0.6442	0.5924	0.5369	0.8198
0.959415	0.20787	0.761677	0.147634		71	0.8484	1.1588	1.4639	1.0506	1.0824	0.8144	0.9231	0.8809	0.9266	0.9011	0.7765	0.617	1.0287		71	0.6965	1.0886	0.8687	0.8454	0.6948	0.734	0.8358	0.6656	0.8972	0.6415	0.5946	0.5386	0.8005
0.961554	0.211304	0.769485	0.142966		72	0.8779	1.1114	1.4914	1.0532	1.0902	0.8203	0.9261	0.8786	0.9054	0.8905	0.7682	0.6209	1.0661		72	0.6956	1.0663	0.8793	0.869	0.7079	0.7226	0.8379	0.68	0.8899	0.6488	0.5963	0.5571	0.8526
0.955415	0.201341	0.773731	0.152509		73	0.9041	1.091	1.4266	1.0092	1.1199	0.8196	0.9538	0.8713	0.927	0.8985	0.7898	0.5691	1.0405		73	0.6973	1.0655	0.8661	0.8631	0.7214	0.7151	0.867	0.6909	0.9308	0.6526	0.6129	0.5009	0.8749
0.953838	0.186143	0.779323	0.152262		74	0.8862	1.0616	1.4106	1.0098	1.1152	0.8375	0.983	0.866	0.9514	0.8843	0.7861	0.6282	0.98		74	0.6754	1.0728	0.8784	0.8657	0.7178	0.7241	0.8837	0.6987	0.9709	0.6419	0.6272	0.5388	0.8358
0.973346	0.18203	0.794854	0.15475		75	0.9173	1.1038	1.3826	1.0595	1.1593	0.8616	0.9937	0.8915	0.9639	0.9129	0.846	0.6161	0.9453		75	0.6736	1.0931	0.8805	0.8948	0.7492	0.7318	0.9047	0.7368	0.9925	0.6846	0.674	0.5138	0.8037
0.983669	0.183656	0.804892	0.152066		76	0.9251	1.1021	1.3673	1.0225	1.2151	0.902	1.0185	0.9113	0.9649	0.9194	0.8145	0.6122	1.0128		76	0.6746	1.0952	0.8733	0.8835	0.8018	0.7428	0.9199	0.7662	0.9681	0.691	0.683	0.5058	0.8584
0.997615	0.166633	0.820369	0.149169		77	0.9521	1.0932	1.3089	1.031	1.2601	0.9083	1.0124	0.9014	0.9943	0.9575	0.8489	0.6626	1.0383		77	0.6928	1.1198	0.8675	0.8795	0.8312	0.7336	0.9256	0.7704	1.0075	0.7309	0.7181	0.5379	0.85
1.01272	0.167628	0.842315	0.13993		78	0.9718	1.0942	1.3199	1.0341	1.2834	0.9375	1.0149	0.9286	0.9856	0.9975	0.8702	0.6608	1.0668		78	0.7055	1.1251	0.8902	0.8986	0.8623	0.7623	0.9216	0.8126	0.997	0.7671	0.7669	0.5594	0.8815
1.01618	0.170184	0.849077	0.138704		79	0.9266	1.0837	1.2945	1.0162	1.3422	0.9756	1.0224	0.9417	0.9997	0.987	0.9309	0.6488	1.0411		79	0.6762	1.1242	0.8766	0.8985	0.8888	0.7905	0.9399	0.854	0.9939	0.7553	0.8205	0.5694	0.8502
1.02554	0.171547	0.863362	0.142574		80	0.9473	1.1045	1.3246	1.0114	1.3587	0.9937	1.0087	0.9576	1.0278	0.9941	0.8923	0.6857	1.0256		80	0.6876	1.1449	0.8891	0.8948	0.9075	0.8115	0.9398	0.8723	1.0637	0.7769	0.8171	0.599	0.8195
1.02542	0.148486	0.872523	0.129533		81	0.9667	1.0997	1.2595	1.0424	1.3233	1	1.0014	0.9684	1.0114	0.9762	0.8911	0.7328	1.0576		81	0.7266	1.1244	0.8505	0.9235	0.9239	0.8231	0.9389	0.8976	1.0513	0.7658	0.8367	0.6312	0.8493
1.03655	0.136373	0.891769	0.135017		82	1.0013	1.1135	1.2585	1.0387	1.3056	0.9944	1.0005	0.9884	1.0449	0.9832	0.9275	0.7648	1.0539		82	0.7431	1.1714	0.874	0.9265	0.9256	0.8327	0.9404	0.9208	1.095	0.7481	0.8806	0.6777	0.8571
1.0332	0.131214	0.893408	0.137941		83	1.0095	1.0388	1.2751	1.0389	1.2807	0.9893	1.0195	1.0193	1.0667	0.963	0.9096	0.7831	1.0381		83	0.762	1.1452	0.8826	0.9462	0.9339	0.8332	0.9567	0.9318	1.133	0.7417	0.8563	0.68	0.8117
1.02335	0.134424	0.888554	0.146829		84	1.0245	1.006	1.2779	1.0225	1.2496	1.0029	1.0116	1.0295	1.0754	0.9518	0.8998	0.7467	1.0053		84	0.7658	1.1202	0.8949	0.9365	0.9337	0.8495	0.9272	0.9565	1.1631	0.7569	0.8549	0.6254	0.7666
1.02417	0.136121	0.893415	0.16444		85	1.0254	1.0353	1.2453	1.0595	1.2896	1.0027	0.981	1.0158	1.0788	0.9657	0.896	0.7542	0.9649		85	0.7758	1.1794	0.8563	0.9521	0.9805	0.8294	0.8895	0.9671	1.2031	0.7745	0.8465	0.6373	0.7229
1.02286	0.123633	0.895585	0.158661		86	1.0371	1.0544	1.2278	1.0544	1.2529	1.0004	0.9664	1.0534	1.0357	0.9774	0.8957	0.7785	0.9631		86	0.7801	1.1774	0.8501	0.9573	0.9954	0.8216	0.8801	0.9979	1.1644	0.7757	0.8732	0.66	0.7094
1.0245	0.137465	0.902554	0.169698		87	1.03	1.0737	1.2644	1.0795	1.2542	1.0107	0.9436	1.0516	1.0207	0.9812	0.9441	0.7291	0.9357		87	0.7859	1.1935	0.8696	0.9943	1.0191	0.8316	0.865	0.993	1.1632	0.7756	0.9275	0.6086	0.7063
1.02986	0.142941	0.899785	0.158603		88	1.0515	1.0047	1.273	1.1012	1.3078	1.0384	0.9221	0.9934	1.0381	0.9683	0.9139	0.7614	1.0144		88	0.7932	1.1285	0.8788	1.0037	1.0273	0.8378	0.829	0.9476	1.1889	0.778	0.9273	0.6433	0.7138
1.03786	0.185836	0.908123	0.175208		89	1.0486	1.0577	1.2876	1.1229	1.4655	1.0278	0.8859	1.0294	1.0099	0.9591	0.8469	0.7306	1.0203		89	0.7772	1.1508	0.9072	1.0227	1.1452	0.807	0.8138	0.9725	1.1763	0.7718	0.9017	0.6305	0.7289
1.05052	0.223034	0.917962	0.187045		90	1.0124	0.9907	1.2892	1.1278	1.6683	1.054	0.8977	0.9783	0.9829	1.0017	0.8644	0.7752	1.0141		90	0.7709	1.094	0.9028	1.0523	1.2918	0.7931	0.8114	0.9419	1.1715	0.8087	0.9183	0.6931	0.6837
1.05968	0.246142	0.924938	0.212061		91	1.019	0.9851	1.2932	1.1823	1.7427	1.0487	0.9095	0.9364	1.0405	1.0128	0.834	0.7595	1.0122		91	0.7653	1.094	0.9089	1.0931	1.4023	0.7922	0.8258	0.8883	1.1874	0.8225	0.8828	0.6827	0.6789
1.0637	0.245986	0.918992	0.188515		92	1.0533	0.9082	1.2868	1.1361	1.7566	1.0806	0.9297	0.9042	1.0347	1.0366	0.8568	0.7833	1.0612		92	0.7829	1.0122	0.9015	1.0481	1.3751	0.8187	0.8293	0.8417	1.1702	0.8229	0.8999	0.7213	0.7231
