# Supplementary material for: Hypoxia controls plasma membrane targeting of polarity proteins by dynamic turnover of PI4P and PI(4,5)P2
Source: eLife. 2022 Jun 9;11:e79582. doi: 10.7554/eLife.79582 (PMC9242647; doi:10.7554/eLife.79582)
Supplement: Figure 7—source data 4. [file elife-79582-fig7-data4.xlsx]

## Sheet: Figure 7D PI4P PIP2#
Figure 7 Souce Data 4
										1	2	3	4	5	6	7	8	9	10	11	12	13	14	15	16	17	18	19	20	21	22	23	24	25	26	27	28	29	30	31	32	33	34	35	36	37	38	39	40
P4Mx2::GFP				PLC-PH::GFP					P4Mx2::GFP
DMSO		WM		DMSO		WM			DMSO
AVG	STDEV	AVG	STDEV	AVG	STDEV	AVG	STDEV
t_C1_PM/Cy	t_C1_PM/Cy	t_C1_PM/Cy	t_C1_PM/Cy	t_C2_PM/Cy	t_C2_PM/Cy	t_C2_PM/Cy	t_C2_PM/Cy		min	t_C1_PM/Cy	t_C1_PM/Cy	t_C1_PM/Cy	t_C1_PM/Cy	t_C1_PM/Cy	t_C1_PM/Cy	t_C1_PM/Cy	t_C1_PM/Cy	t_C1_PM/Cy	t_C1_PM/Cy	t_C1_PM/Cy	t_C1_PM/Cy	t_C1_PM/Cy	t_C1_PM/Cy	t_C1_PM/Cy	t_C1_PM/Cy	t_C1_PM/Cy	t_C1_PM/Cy	t_C1_PM/Cy	t_C1_PM/Cy	t_C1_PM/Cy	t_C1_PM/Cy	t_C1_PM/Cy	t_C1_PM/Cy	t_C1_PM/Cy	t_C1_PM/Cy	t_C1_PM/Cy	t_C1_PM/Cy	t_C1_PM/Cy	t_C1_PM/Cy	t_C1_PM/Cy	t_C1_PM/Cy	t_C1_PM/Cy	t_C1_PM/Cy	t_C1_PM/Cy	t_C1_PM/Cy	t_C1_PM/Cy	t_C1_PM/Cy	t_C1_PM/Cy	t_C1_PM/Cy
0.987535	0.0548839	1.00135	0.0527058	0.987402	0.0454841	0.997182	0.0380262		1	0.9735	1.1357	1.0852	0.9965	0.922	0.9787	0.9853	0.958	1.0235	0.9395	0.9729	1.0175	0.9565	0.9388	1.0791	0.9167	1.0199	0.9818	0.9324	1.012	0.9733	0.9208	0.9418	0.9144	0.9811	0.9581	1.0169	0.9573	0.8786	0.9403	0.9791	0.9871	1.049	0.9883	1.0184	0.9347	0.9459	1.0376	1.0647	0.9708
1.0031	0.0436561	1.01199	0.0404839	1.00049	0.0323951	1.00294	0.0322093		2	1.0367	0.9245	0.9421	0.9672	1.0098	1.034	0.9876	1.0234	0.9581	1.053	0.986	0.9913	0.9789	1.0439	0.9583	1.0291	1.1452	1.0615	1.031	1.0068	0.9675	1.0537	0.9705	1.0388	1.057	0.9076	1.0004	1.0186	1.046	0.9581	0.979	1.0197	0.9868	0.9949	0.9532	1.0295	1.0533	0.9778	0.9982	0.9095
1.00936	0.0566867	0.986658	0.0571718	1.01211	0.0380656	0.999878	0.0437023		3	0.9898	0.9398	0.9727	1.0364	1.0683	0.9872	1.0272	1.0185	1.0184	1.0074	1.041	0.9912	1.0647	1.0172	0.9625	1.0543	0.8349	0.9567	1.0365	0.9812	1.0593	1.0255	1.0877	1.0468	0.962	1.1343	0.9827	1.0241	1.0754	1.1017	1.0419	0.9932	0.9643	1.0168	1.0284	1.0358	1.0008	0.9845	0.9371	1.1196
1.02206	0.0734521	1.02643	0.0889599	1.03806	0.0585116	1.03348	0.0535067		4	1.1502	1.0571	1.092	1.0647	1.1182	0.9401	1.0167	1.0248	1.0103	1.0075	1.038	1.0528	1.0292	0.9044	0.888	1.0886	1.0178	1.0052	1.052	1.0028	0.9362	1.1066	1.0276	1.1796	0.9916	1.0764	1.157	1.0492	1.0231	0.9552	1.0738	0.9877	0.9244	0.9583	0.9671	1.0374	1.0055	0.9704	1.0386	0.99
1.02247	0.0887599	1.00514	0.097677	1.05056	0.0561251	1.04032	0.074474		5	1.0912	0.9736	0.9025	1.0419	1.085	0.9824	1.0781	1.094	0.9723	1.0028	0.8991	1.0671	1.0784	0.9022	1.0019	1.1291	1.1214	1.0553	1.0992	0.9591	1.0012	1.103	0.8841	1.1258	0.9928	1.1998	1.1311	1.0053	1.0599	1.1162	1.0328	1.0511	0.957	1.075	0.8279	0.9466	1.1372	1.0768	1.0854	0.9252
1.02551	0.130379	1.05566	0.124249	1.04594	0.0726112	1.05498	0.0877755		6	1.1776	0.9622	0.8368	1.1017	1.1789	0.9129	1.1159	1.0498	1.0794	1.1041	1.0657	1.0285	1.0473	0.8494	0.9521	1.0626	1.0868	1.0934	1.1297	0.9222	1.0962	1.1562	0.8515	0.9947	1.0211	1.0029	1.2436	1.0823	0.8732	0.6567	1.0369	1.1257	0.9216	1.1254	0.8227	0.892	1.0934	1.3956	0.9981	0.8416
1.04973	0.137754	1.05256	0.142881	1.04752	0.0964875	1.04474	0.102828		7	1.1822	0.9779	1.0437	1.1734	1.1631	0.9333	1.1601	1.0414	1.1097	1.1805	0.9157	1.0403	1.008	0.8176	0.9446	1.0744	1.2475	1.1383	1.2321	0.9641	1.1122	1.2304	0.8154	0.9437	1.1234	0.972	1.1439	1.0246	0.9778	0.8083	1.1049	1.0607	0.964	1.0569	0.8289	0.8674	1.1445	1.3929	0.9204	0.8798
1.04916	0.154669	1.07249	0.165458	1.03176	0.12037	1.03454	0.132049		8	1.1018	0.969	0.9631	1.2103	1.1486	0.9503	1.1068	1.0275	1.1486	1.1493	0.9711	1.0395	0.9446	0.8647	0.9461	1.1307	1.0935	1.0782	1.1324	1.0699	1.1551	1.2741	0.552	0.9511	1.2631	1.0474	1.1671	0.881	1.0872	0.7808	1.0585	1.014	1.1123	0.9418	0.9074	0.7687	1.1637	1.3811	0.9198	0.9185
1.07456	0.219333	1.09764	0.199562	1.03277	0.153312	1.01246	0.160576		9	1.1412	1.2202	1.2619	1.1321	1.0727	0.9831	1.2556	0.9464	1.1753	1.1423	0.9208	1.0536	0.8817	0.7653	0.9627	1.1988	0.9391	1.1396	1.0743	1.1369	1.3389	1.3583	0.3827	0.9318	1.3522	0.8686	1.2605	0.8308	1.1227	0.8062	1.185	1.1097	1.081	0.9391	0.8802	0.7368	1.1413	1.4134	0.9002	0.93
1.08969	0.250366	1.11839	0.198903	1.01983	0.17672	0.993644	0.147723		10	1.1768	1.3463	1.3091	1.1351	1.1547	1.0349	1.1738	1.0129	1.1297	1.1363	0.9487	1.0565	0.7804	0.8042	0.9818	1.2699	0.909	1.0643	1.0762	1.0291	1.419	1.4189	0.311	0.9521	1.4799	0.9276	1.2948	0.8187	1.0111	0.8569	1.226	1.0094	1.141	0.9127	0.9341	0.6267	1.1764	1.3889	0.8629	0.9221
1.10157	0.275098	1.13387	0.219923	1.01739	0.193025	0.967856	0.149193		11	1.3795	1.4754	1.4821	1.1466	1.0461	1.0681	1.2298	1.0241	1.0802	1.2118	0.988	1.0425	0.7867	0.8259	0.9343	1.1474	0.9339	1.1536	1.0003	1.0548	1.5538	1.3385	0.295	0.9102	1.4922	0.938	1.2266	0.7122	1.0358	0.8736	1.2453	1.054	1.1917	0.8419	0.9296	0.6494	1.1839	1.2685	0.8275	0.8857
1.1184	0.305108	1.15125	0.241519	0.999944	0.207436	0.955362	0.160503		12	1.3325	1.6485	1.7378	1.176	1.0778	1.0797	1.2938	1.025	1.1605	1.2962	1.0352	1.0321	0.7771	0.7837	0.9869	1.1961	0.8974	1.0803	0.945	1.0462	1.7027	1.4437	0.1906	0.8852	1.4529	0.9376	1.308	0.7528	1.0344	0.9213	1.2276	1.0968	1.2194	0.7856	0.9725	0.5798	1.2025	1.2613	0.8979	0.903
1.1338	0.308514	1.15994	0.25765	0.997615	0.212386	0.939076	0.155356		13	1.5149	1.5143	1.6219	1.1735	1.0636	1.098	1.2932	1.0745	1.2423	1.3429	1.0575	1.0263	0.7874	0.8144	1.0383	1.2174	0.9987	1.0237	0.9927	1.1008	1.7937	1.4564	0.2326	0.9071	1.4648	0.8779	1.3396	0.7566	1.0186	1.0797	1.2466	1.1217	1.3032	0.74	0.9938	0.5786	1.219	1.1838	0.8511	0.9046
1.12298	0.31576	1.15619	0.275502	0.980958	0.214923	0.930011	0.151204		14	1.4719	1.6644	1.691	1.1689	0.9627	1.1374	1.2108	1.0491	1.256	1.2709	1.0192	0.9711	0.7888	0.8154	1.0659	1.2439	0.9231	1.0485	0.9694	1.0305	1.7156	1.4463	0.2155	0.9342	1.4402	0.8837	1.2431	0.7501	1.0166	1.1786	1.2437	1.1289	1.2106	0.7383	1.0385	0.529	1.2352	1.0971	0.8357	0.9259
1.1015	0.315896	1.14206	0.280898	0.975812	0.209772	0.913362	0.144118		15	1.3539	1.7919	1.7662	1.1708	0.896	1.1166	1.2041	1.0517	1.1615	1.2573	0.9284	0.9663	0.7586	0.8523	1.0521	1.1753	0.9233	1.0295	0.9511	1.0628	1.66	1.4117	0.2271	0.9524	1.4006	0.841	1.271	0.7214	1.1198	0.969	1.2254	1.0904	1.1453	0.744	0.9382	0.5143	1.1792	1.1078	0.8221	0.8962
1.08651	0.312011	1.11854	0.281421	0.959254	0.201754	0.899682	0.143684		16	1.2889	1.6908	1.7295	1.1056	0.9349	1.0186	1.2261	1.0697	1.1286	1.259	0.8661	0.9305	0.7771	0.7609	1.0247	1.1346	0.8893	1.0138	0.9003	1.0291	1.5951	1.324	0.2503	0.9311	1.4861	0.8155	1.1933	0.7272	0.9946	1.2125	1.1965	1.1254	1.155	0.7159	0.9652	0.5213	1.2177	1.0203	0.7776	0.9101
1.06471	0.310356	1.094	0.285248	0.960717	0.205179	0.897916	0.141402		17	1.2247	1.6836	1.7006	1.1831	0.8505	1.035	1.1163	1.045	1.1566	1.2424	0.7696	0.8659	0.7453	0.8036	0.993	1.1055	0.8846	0.9075	0.9327	0.9662	1.516	1.3459	0.2911	0.9774	1.2436	0.7814	1.2323	0.7301	0.9601	1.0168	1.2221	1.1595	1.1263	0.6983	0.9894	0.5063	1.1261	1.051	0.7971	0.8964
1.0301	0.306459	1.06262	0.277043	0.938629	0.199266	0.888113	0.142623		18	1.2429	1.6633	1.7267	1.1315	0.8292	0.995	1.1146	1.0663	1.0973	1.1179	0.76	0.8688	0.7055	0.7744	0.931	0.9834	0.9116	0.8943	0.9266	0.9938	1.3965	1.2963	0.2319	0.9403	1.3871	0.6839	1.1859	0.7456	0.9164	1.1165	1.1512	1.0967	1.1103	0.6537	0.9835	0.5086	1.086	0.9211	0.7336	0.8884
1.00996	0.301976	1.03415	0.267107	0.934606	0.191261	0.876198	0.136553		19	1.1498	1.7272	1.7015	1.1204	0.8014	1.0431	1.0927	1.0235	0.9753	1.1482	0.7081	0.8388	0.7195	0.7939	0.905	0.9725	0.8156	0.9329	0.9285	0.9587	1.3692	1.3422	0.2912	0.9388	1.147	0.7959	1.1985	0.7365	0.8494	0.8643	1.0933	1.0967	1.0585	0.6552	1.0212	0.5015	1.0426	0.8958	0.7446	0.8467
1.00655	0.288002	1.01091	0.255226	0.933133	0.191344	0.875224	0.139993		20	1.1576	1.6938	1.7096	1.1035	0.8149	1.0227	1.1077	1.0595	0.9571	1.1378	0.7198	0.8268	0.7377	0.8458	0.8743	0.897	0.8393	0.8929	0.895	1.0008	1.3351	1.3253	0.337	0.9116	1.0603	0.8019	1.1524	0.7588	0.9992	1.0656	1.1105	1.0818	1.0193	0.5804	0.986	0.5021	1.0393	0.926	0.7588	0.8448
0.97701	0.294292	0.980676	0.24345	0.913783	0.179881	0.861784	0.131251		21	1.189	1.6447	1.6647	1.0392	0.7446	1.045	1.0704	1.0333	0.9189	1.1318	0.6568	0.8057	0.7127	0.828	0.8173	0.8307	0.7278	0.8779	0.9232	0.9699	1.4006	1.244	0.3365	0.8589	1.0837	0.6846	1.0857	0.7568	0.8592	1.1697	1.1091	1.0615	0.9839	0.5997	0.9989	0.5248	0.9865	0.8402	0.7783	0.81
0.959217	0.288861	0.97762	0.244552	0.899742	0.180151	0.8666	0.147438		22	1.1284	1.5954	1.6674	1.0107	0.7761	1.0249	1.0114	1.0392	0.8859	1.0178	0.6188	0.7878	0.7132	0.8183	0.7845	0.7963	0.8838	0.8965	0.9092	0.9259	1.3546	1.1914	0.331	0.8336	1.1255	0.7273	1.0992	0.7688	0.8078	1.1	1.0206	1.0296	0.9339	0.582	1.0222	0.4941	0.9665	0.8549	0.7007	0.7482
0.953092	0.280375	0.959269	0.24609	0.883585	0.177465	0.85734	0.151551		23	1.1016	1.5765	1.6592	0.9821	0.814	1.0292	1.0434	1.004	0.9022	0.9919	0.6296	0.7931	0.7234	0.826	0.7773	0.784	0.8358	0.8874	0.8979	0.9509	1.4389	1.2179	0.3242	0.8447	1.0302	0.786	1.0859	0.7432	0.8433	0.9351	0.9734	1.0814	0.974	0.5978	1.0814	0.5046	0.9252	0.839	0.7133	0.6896
0.957115	0.285628	0.952093	0.248702	0.869431	0.182054	0.847198	0.151821		24	1.0755	1.6474	1.5761	1.02	0.803	1.0704	1.021	0.9895	0.8729	0.9955	0.6613	0.7751	0.7085	0.8431	0.778	0.7788	0.8526	0.9129	0.879	0.9938	1.4426	1.2094	0.3316	0.8526	1.0788	0.7746	1.1293	0.7429	0.8341	0.9728	0.9757	1.0255	0.9086	0.5868	1.0135	0.4904	0.9594	0.8188	0.7318	0.7231
0.944369	0.281481	0.945113	0.243734	0.848188	0.178755	0.835238	0.154366		25	1.1017	1.5575	1.5486	0.9953	0.8237	1.0398	1.0343	1.0099	0.8585	1.0085	0.6508	0.7745	0.6814	0.8046	0.7587	0.8018	0.8601	0.9156	0.8737	0.9852	1.4218	1.1808	0.331	0.8762	1.0794	0.5909	1.1604	0.7504	0.8189	0.9964	0.9559	1.0894	1.0099	0.5775	1.0214	0.48	0.8731	0.7954	0.7067	0.7144
0.941317	0.278059	0.936271	0.23472	0.827971	0.186745	0.815389	0.158626		26	1.1338	1.5448	1.5863	0.9847	0.8012	1.0278	1.0057	0.962	0.8134	0.9971	0.7367	0.7261	0.6736	0.823	0.7186	0.8083	0.9021	0.928	0.8185	0.9358	1.4478	1.1791	0.3177	0.8235	1.0793	0.6111	1.1124	0.746	0.8098	0.9966	0.9756	1.151	0.9605	0.6056	1.0267	0.4615	0.9043	0.784	0.6962	0.7785
0.934525	0.277306	0.941818	0.249404	0.800585	0.179997	0.805458	0.160314		27	1.197	1.4724	1.475	0.9729	0.8394	0.9887	0.9698	0.9897	0.8353	0.9954	0.6849	0.7353	0.6717	0.8761	0.7369	0.8274	0.8106	0.9421	0.8067	0.9365	1.4815	1.1797	0.2997	0.8481	1.1081	0.5175	1.1022	0.7097	0.8484	0.9081	0.9948	1.1028	0.9499	0.5948	1.0719	0.4894	0.8642	0.8282	0.6852	0.7533
0.946477	0.290621	0.935716	0.2431	0.7868	0.186393	0.791156	0.166019		28	1.2314	1.5413	1.5093	0.9658	0.8629	0.9998	0.9937	0.9573	0.9062	0.9546	0.7137	0.7451	0.6676	0.9218	0.7403	0.8471	0.881	0.8681	0.8435	0.9686	1.5182	1.1339	0.2978	0.8357	1.1971	0.6306	1.1319	0.7165	0.8086	1.0329	1.008	1.1221	0.9633	0.6174	1.0645	0.4635	0.8618	0.7687	0.6611	0.7644
0.935967	0.277435	0.94684	0.250769	0.766754	0.184047	0.778127	0.170043		29	1.2579	1.4804	1.4042	1.0085	0.8492	0.9918	0.9825	0.9202	0.8001	1.0085	0.7478	0.736	0.6413	0.8666	0.7402	0.829	0.832	0.9343	0.8522	0.9411	1.5259	1.0627	0.2973	0.7921	1.2021	0.5264	1.1819	0.7403	0.8148	1.0693	0.9824	1.1356	0.9239	0.5855	1.1231	0.4529	0.84	0.7591	0.6919	0.7141
0.936554	0.277082	0.938889	0.244851	0.739965	0.179811	0.757398	0.175694		30	1.2715	1.4102	1.4409	0.9788	0.8335	0.9973	0.9543	0.9326	0.8274	0.9765	0.7617	0.7461	0.6905	0.8469	0.7596	0.8226	0.824	0.9523	0.8467	0.9111	1.5351	1.0774	0.2986	0.8171	1.2363	0.5706	1.1406	0.7378	0.7943	0.9397	0.9427	1.0633	0.9308	0.5659	1.0812	0.4629	0.9108	0.7847	0.7104	0.7828
0.920396	0.28705	0.932209	0.250929	0.720992	0.183299	0.733724	0.189263		31	1.1592	1.441	1.4864	0.9839	0.7914	0.9631	0.9532	0.8651	0.8025	0.9316	0.7577	0.7236	0.6288	0.8507	0.7867	0.9061	0.8025	0.9322	0.8037	0.8584	1.6081	1.009	0.2584	0.7829	1.2281	0.4775	1.1671	0.7077	0.8256	0.9966	0.9109	1.0304	0.9442	0.5918	1.094	0.434	0.9139	0.7519	0.6778	0.7694
0.9142	0.278513	0.925793	0.262553	0.706633	0.181728	0.713329	0.187011		32	1.1922	1.3745	1.4275	0.9809	0.7775	1.0173	0.8861	0.871	0.7651	0.9644	0.7633	0.7262	0.6132	0.8762	0.796	0.8662	0.7444	0.9335	0.836	0.9031	1.4548	0.9693	0.3124	0.7315	1.2091	0.479	1.2402	0.6918	0.8474	0.9983	0.9411	1.0305	0.9262	0.5751	1.0779	0.4412	0.859	0.7361	0.6749	0.7523
0.904115	0.278663	0.916838	0.261027	0.682985	0.182377	0.692998	0.187618		33	1.1633	1.3206	1.2992	1.013	0.7614	1.0117	0.8914	0.8735	0.7641	1.0352	0.8173	0.7616	0.5656	0.848	0.7625	0.8256	0.7491	0.9436	0.7621	0.9151	1.6222	0.9602	0.2533	0.702	1.2726	0.4225	1.1992	0.6679	0.8173	0.9704	0.9228	0.9707	0.9486	0.5989	1.0768	0.4247	0.8676	0.7151	0.6449	0.7764
0.884569	0.272632	0.920402	0.25988	0.664627	0.181507	0.679571	0.193721		34	1.1897	1.2249	1.2456	0.9679	0.7966	0.9675	0.8792	0.8238	0.7586	1.0779	0.7839	0.7505	0.5507	0.878	0.7596	0.8012	0.6822	0.9329	0.7443	0.8267	1.5202	0.9276	0.2303	0.6972	1.2389	0.3999	1.2341	0.6318	0.843	1.0629	0.8797	0.9228	0.9602	0.5733	1.0922	0.417	0.8505	0.6807	0.6762	0.7449
0.872571	0.280895	0.901024	0.264629	0.645575	0.175734	0.651573	0.194231		35	1.2254	1.2372	1.3058	0.9887	0.6888	0.9564	0.8876	0.8195	0.7763	0.9982	0.7966	0.7471	0.5544	0.7415	0.7512	0.7744	0.6502	0.9212	0.7563	0.7871	1.4594	0.8942	0.2461	0.657	1.2815	0.3926	1.2496	0.6534	0.8118	0.9176	0.8927	0.8372	0.973	0.5416	1.1047	0.4207	0.8291	0.7099	0.6556	0.7451
0.863123	0.285082	0.890089	0.263585	0.632596	0.182749	0.634036	0.190685		36	1.1171	1.2772	1.2527	0.9808	0.7406	0.9025	0.8153	0.8422	0.7581	0.9753	0.7712	0.7352	0.4915	0.8308	0.7602	0.7114	0.7064	0.9114	0.7499	0.8192	1.6483	0.8691	0.2402	0.6057	1.2899	0.3795	1.1954	0.6234	0.8035	1.056	0.9047	0.8428	0.916	0.5276	1.1148	0.4251	0.8233	0.6315	0.5908	0.7144
0.857485	0.289894	0.873082	0.27065	0.623067	0.170333	0.618804	0.192808		37	1.1936	1.3508	1.3596	0.9246	0.6497	0.9525	0.8234	0.8375	0.7246	1.0522	0.7974	0.7202	0.4576	0.6577	0.7387	0.7342	0.6498	0.883	0.7189	0.8634	1.6371	0.8507	0.2479	0.5939	1.3027	0.3879	1.1278	0.6123	0.8371	1.1694	0.9081	0.7634	0.8875	0.5631	1.1354	0.4159	0.7868	0.6889	0.6295	0.7018
0.827744	0.275807	0.853853	0.258709	0.606015	0.172048	0.596609	0.182752		38	1.0953	1.2114	1.2069	0.9547	0.6506	0.8823	0.7935	0.8303	0.7488	1.0558	0.7307	0.7261	0.4897	0.6654	0.6728	0.6907	0.609	0.877	0.7019	0.8464	1.4361	0.853	0.2123	0.5666	1.2855	0.3696	1.1929	0.5848	0.7713	0.987	0.9507	0.7238	0.9587	0.5243	1.086	0.4036	0.8263	0.5961	0.6072	0.6156
0.812146	0.273984	0.838878	0.26316	0.587973	0.164617	0.584369	0.182197		39	1.0818	1.1389	1.199	0.9091	0.6422	0.8153	0.7872	0.7938	0.7012	1.0259	0.7326	0.7362	0.4209	0.6615	0.6977	0.6264	0.6241	0.8277	0.7112	0.7788	1.4538	0.776	0.2059	0.5367	1.2983	0.3643	1.1615	0.5879	0.7567	1.0304	0.9734	0.7205	0.9142	0.5206	1.1106	0.4296	0.8379	0.6646	0.6213	0.5355
0.791692	0.275758	0.819778	0.25336	0.579544	0.163272	0.569513	0.176076		40	1.0975	1.1056	1.2354	0.8516	0.6752	0.8701	0.7578	0.7536	0.6179	1.0488	0.7079	0.7109	0.4253	0.6592	0.6662	0.547	0.5349	0.8733	0.6832	0.7682	1.4401	0.8005	0.1967	0.5124	1.2081	0.3585	1.1774	0.5813	0.7477	1.0347	0.9227	0.5969	0.9372	0.5101	1.0936	0.4173	0.7888	0.6262	0.5788	0.553
0.777104	0.27605	0.813184	0.262106	0.56575	0.155337	0.558011	0.17662		41	1.0383	1.147	1.1944	0.8142	0.6571	0.7723	0.7547	0.7488	0.6189	1.0295	0.7054	0.7077	0.3889	0.6649	0.6407	0.6	0.5828	0.815	0.6586	0.7598	1.4267	0.781	0.2069	0.4963	1.1965	0.3409	1.1048	0.5205	0.7485	1.051	0.8241	0.5922	0.8699	0.501	1.0634	0.4067	0.7862	0.6307	0.5655	0.53
0.763848	0.275017	0.795176	0.257089	0.557844	0.158351	0.547798	0.1753		42	1.0937	1.2184	1.219	0.8344	0.6417	0.8104	0.7449	0.7384	0.6121	1.0154	0.705	0.7182	0.3713	0.6071	0.6083	0.5411	0.5314	0.7957	0.6385	0.7269	1.3479	0.7669	0.1967	0.478	1.1062	0.3515	1.1068	0.5314	0.7003	0.9307	0.8501	0.5659	0.8702	0.4898	1.034	0.4159	0.7605	0.6197	0.5509	0.5235
0.740296	0.261308	0.772876	0.25444	0.54551	0.149228	0.533947	0.173048		43	0.9631	1.1052	1.1999	0.7605	0.6473	0.7676	0.6863	0.7273	0.6178	0.9757	0.609	0.6878	0.3681	0.6055	0.6061	0.5688	0.5034	0.7769	0.642	0.7257	1.3873	0.8	0.2015	0.4362	1.0713	0.3078	1.0152	0.5205	0.7205	0.882	0.8336	0.532	0.8661	0.5336	1.0955	0.4024	0.7157	0.5651	0.5531	0.5121
0.725083	0.256559	0.750824	0.244049	0.533531	0.153455	0.518876	0.168823		44	1.0196	1.0535	1.1863	0.7123	0.6115	0.8221	0.7057	0.7031	0.5942	0.96	0.6946	0.6904	0.3637	0.5494	0.5764	0.5105	0.4295	0.7763	0.6287	0.7062	1.3226	0.7758	0.1817	0.4445	1.0083	0.3435	1.0148	0.469	0.7126	0.9096	0.8028	0.5541	0.8499	0.4685	1.0142	0.4057	0.7361	0.5882	0.5462	0.4782
0.717485	0.25064	0.734489	0.247844	0.529475	0.148555	0.508224	0.161134		45	1.0519	1.0675	1.1226	0.7004	0.628	0.7726	0.6209	0.7037	0.5618	0.9265	0.6956	0.6781	0.3531	0.5495	0.5636	0.5331	0.505	0.777	0.591	0.707	1.2613	0.7416	0.1886	0.4343	1.054	0.3569	0.8945	0.4576	0.7024	1.0688	0.7724	0.5758	0.8359	0.4445	1.0497	0.4175	0.7227	0.5792	0.5078	0.493
0.693167	0.236865	0.721707	0.243797	0.520154	0.1431	0.501296	0.16634		46	0.9881	1.0756	1.128	0.6687	0.6103	0.7701	0.6903	0.6865	0.5447	0.957	0.5779	0.6809	0.3424	0.5171	0.5588	0.5201	0.5141	0.7227	0.5508	0.6662	1.1921	0.7379	0.1876	0.4485	1.0549	0.3537	0.8787	0.502	0.6452	0.8336	0.7729	0.4988	0.8214	0.4465	1.0156	0.3707	0.6982	0.5479	0.5177	0.4968
0.683731	0.238001	0.703104	0.232399	0.507223	0.140017	0.490147	0.15261		47	0.9615	1.0223	1.0694	0.6489	0.6152	0.7411	0.6747	0.6684	0.5227	0.9968	0.6003	0.6354	0.3531	0.5238	0.5117	0.5453	0.4157	0.7182	0.5708	0.6583	1.2304	0.785	0.1846	0.4556	1.0044	0.3203	0.8766	0.4503	0.645	0.8853	0.6868	0.4971	0.8288	0.417	0.9803	0.3911	0.7017	0.5919	0.4944	0.4875
0.673535	0.238523	0.687182	0.235791	0.501335	0.140069	0.477724	0.150952		48	0.9615	1.1002	1.1939	0.5874	0.6412	0.7544	0.6091	0.6352	0.5028	0.8835	0.6254	0.6473	0.3372	0.4903	0.508	0.45	0.4002	0.6931	0.5909	0.6755	1.0996	0.7577	0.207	0.4003	1.0475	0.3436	0.8795	0.4586	0.6115	0.9425	0.6771	0.5212	0.8325	0.3949	0.9379	0.3937	0.6819	0.5588	0.4637	0.4821
0.672604	0.243311	0.670696	0.221867	0.499625	0.136837	0.474944	0.156692		49	0.9162	1.0939	1.2908	0.6206	0.6526	0.6969	0.6325	0.6078	0.497	0.8832	0.5886	0.6215	0.343	0.4811	0.5063	0.4887	0.5055	0.6841	0.6033	0.6438	1.1184	0.7189	0.1838	0.4276	0.9979	0.314	0.8398	0.4594	0.594	0.8772	0.6453	0.5086	0.8066	0.4313	0.9836	0.3866	0.6777	0.5712	0.4604	0.4168
0.650669	0.235483	0.661891	0.222294	0.484119	0.142547	0.467022	0.150937		50	0.904	0.9897	1.1841	0.6051	0.6333	0.7105	0.61	0.614	0.4662	0.8926	0.5952	0.6067	0.33	0.5097	0.512	0.4962	0.2989	0.6788	0.5714	0.618	1.2125	0.7043	0.1833	0.3593	0.9966	0.3412	0.7868	0.4238	0.5608	0.8473	0.6233	0.5023	0.8122	0.3763	0.9571	0.3795	0.6714	0.5443	0.4352	0.453
0.644283	0.230817	0.642413	0.218008	0.482781	0.132325	0.453969	0.147681		51	1.0264	0.9145	1.0985	0.5758	0.6197	0.7199	0.6538	0.5743	0.4632	0.8708	0.5976	0.5998	0.3285	0.5108	0.5053	0.5164	0.422	0.6598	0.5338	0.5974	1.1539	0.7342	0.1882	0.3849	1.0217	0.3182	0.7882	0.4559	0.5456	0.7414	0.6417	0.5115	0.8004	0.3364	0.9229	0.3901	0.6319	0.5125	0.4629	0.4479
0.646162	0.233829	0.626522	0.204158	0.479967	0.133866	0.445196	0.137858		52	0.9968	1.0018	1.1295	0.5902	0.6759	0.6826	0.5924	0.5816	0.4552	0.8311	0.5929	0.6078	0.3035	0.5075	0.4962	0.5095	0.4046	0.6266	0.5552	0.6086	1.1534	0.7314	0.1826	0.367	1.0025	0.3401	0.7224	0.4333	0.5525	0.9021	0.5838	0.5435	0.8079	0.3718	0.9042	0.371	0.6349	0.5739	0.4474	0.4662
0.635623	0.218877	0.620453	0.199413	0.473825	0.12923	0.442378	0.142978		53	0.9775	0.9595	1.1149	0.5809	0.6445	0.7108	0.6468	0.5539	0.4613	0.8646	0.5686	0.599	0.3241	0.539	0.5033	0.5108	0.4883	0.6127	0.5472	0.5468	1.1427	0.7244	0.1805	0.3668	0.9144	0.3189	0.7558	0.4772	0.5525	0.7516	0.6013	0.504	0.7913	0.3627	0.8669	0.3862	0.6005	0.554	0.4247	0.4147
0.62484	0.218913	0.60926	0.198175	0.467646	0.132361	0.434358	0.140509		54	1.0225	0.9223	1.1033	0.5453	0.6485	0.6923	0.5798	0.5612	0.4409	0.7753	0.5875	0.5887	0.3121	0.5055	0.4593	0.5193	0.4028	0.6079	0.5534	0.5933	1.0181	0.7652	0.1917	0.3714	0.971	0.3301	0.7919	0.4776	0.5436	0.7506	0.5511	0.4924	0.7852	0.3315	0.9084	0.3821	0.5685	0.4806	0.4268	0.4082
0.630329	0.230652	0.599684	0.196469	0.466704	0.124554	0.427082	0.141047		55	0.9913	0.9592	1.1967	0.5795	0.6669	0.6961	0.6128	0.5529	0.4144	0.7927	0.623	0.5856	0.3305	0.4743	0.4944	0.5421	0.4031	0.591	0.5464	0.5236	1.1115	0.7475	0.1853	0.3509	1.0409	0.3145	0.7266	0.4308	0.5423	0.7857	0.5324	0.511	0.7799	0.4013	0.8878	0.3543	0.5883	0.5458	0.4388	0.4198
0.620687	0.212682	0.613773	0.208619	0.460483	0.119803	0.427967	0.142671		56	0.9324	0.8967	1.0273	0.5672	0.6861	0.6813	0.623	0.5557	0.4418	0.7713	0.5991	0.5849	0.2987	0.488	0.4813	0.4891	0.4653	0.6368	0.5555	0.5467	1.0441	0.734	0.2107	0.3497	1.0464	0.3379	0.7333	0.4545	0.5385	0.6248	0.5483	0.4455	0.7797	0.3286	0.888	0.3728	0.5617	0.609	0.4325	0.3824
0.617642	0.215137	0.612533	0.210244	0.451144	0.126776	0.415584	0.149184		57	1.1005	0.8494	1.0171	0.6092	0.6532	0.6947	0.5803	0.561	0.4247	0.7766	0.5547	0.5662	0.3467	0.5738	0.4623	0.4671	0.4479	0.5645	0.5885	0.6252	1.0048	0.7032	0.1701	0.4252	0.8848	0.3162	0.7631	0.4977	0.5172	0.7136	0.5357	0.4713	0.8109	0.3464	1.0369	0.3754	0.5639	0.3654	0.4265	0.4104
0.623313	0.217243	0.609418	0.213175	0.439296	0.120223	0.414084	0.147365		58	1.0742	0.733	0.8441	0.6271	0.6367	0.6952	0.5726	0.6566	0.4034	0.7596	0.5827	0.5529	0.393	0.4684	0.4314	0.5331	0.3963	0.5041	0.6555	0.6256	1.1181	0.7553	0.1324	0.4177	0.892	0.3518	0.8515	0.5076	0.4949	0.6627	0.5391	0.488	0.8273	0.343	1.0823	0.3949	0.5964	0.4972	0.4367	0.3766
0.639744	0.223187	0.598071	0.19896	0.442681	0.128299	0.417056	0.141585		59	0.9858	0.719	0.9968	0.7209	0.7165	0.7567	0.7018	0.652	0.4086	0.7566	0.6266	0.5763	0.4039	0.5383	0.4375	0.5355	0.4168	0.529	0.668	0.6067	0.9794	0.8119	0.1205	0.4178	0.9283	0.3259	0.9574	0.5755	0.4783	0.578	0.5285	0.4768	0.8394	0.3417	1.1051	0.3902	0.6385	0.3934	0.4293	0.3779
0.675346	0.245444	0.585353	0.205954	0.452271	0.131903	0.416307	0.145017		60	1.0288	0.8536	0.994	0.7652	0.7862	0.7635	0.7896	0.6673	0.3507	0.7378	0.6863	0.5694	0.4052	0.5723	0.4351	0.5706	0.5205	0.5666	0.6494	0.6452	1.054	0.9315	0.1161	0.4106	0.9873	0.3404	1.0574	0.528	0.5095	0.6366	0.5807	0.5287	0.8827	0.3512	1.1867	0.3962	0.678	0.3997	0.4108	0.4008
0.698246	0.259674	0.575211	0.192164	0.46354	0.141027	0.415804	0.140944		61	1.0271	0.9191	1.0732	0.806	0.8033	0.8051	0.873	0.746	0.364	0.6824	0.6548	0.5992	0.4067	0.6236	0.4709	0.6293	0.3716	0.5245	0.6726	0.6543	1.0569	0.9616	0.1196	0.4234	1.1518	0.3645	1.0982	0.5334	0.5469	0.5484	0.5995	0.6212	0.8555	0.3741	1.1569	0.4095	0.6916	0.4678	0.424	0.3947
0.73085	0.276158	0.558773	0.181102	0.479771	0.160049	0.415616	0.14307		62	1.0729	0.9063	1.0978	0.7707	0.8752	0.9156	0.9416	0.7686	0.3291	0.7344	0.7762	0.6291	0.4348	0.7166	0.5161	0.7302	0.283	0.5428	0.6921	0.6531	1.1289	1.0161	0.1297	0.5091	1.1954	0.3683	1.2165	0.5377	0.5665	0.5664	0.6104	0.7376	0.9015	0.3852	1.1512	0.4057	0.7005	0.391	0.3986	0.3943
0.755831	0.285575	0.54974	0.175746	0.493263	0.164254	0.419047	0.142932		63	1.086	0.8635	1.1518	0.8041	0.9261	1.0118	1.0094	0.7928	0.3324	0.7172	0.9081	0.67	0.4922	0.7533	0.5698	0.6845	0.4074	0.542	0.6882	0.7097	1.1895	1.1069	0.131	0.5598	1.1859	0.3945	1.2298	0.5604	0.6085	0.4903	0.5984	0.6776	0.9518	0.3824	1.0989	0.3779	0.7297	0.4179	0.4067	0.4138
0.78659	0.302463	0.537858	0.166457	0.510915	0.167103	0.417371	0.135033		64	1.171	1.0363	1.256	0.9012	0.9371	1.0541	0.9922	0.8536	0.338	0.7288	0.9303	0.7283	0.5089	0.8152	0.6203	0.6655	0.3445	0.5646	0.6784	0.711	1.1829	1.1592	0.1495	0.6102	1.1887	0.3943	1.2878	0.6157	0.6005	0.5848	0.6094	0.7617	1.019	0.3795	1.1622	0.3694	0.7166	0.3984	0.4198	0.3744
0.821471	0.314502	0.525287	0.162662	0.530992	0.169193	0.41682	0.133347		65	1.1661	1.0781	1.3614	0.9158	0.9599	1.0624	1.0063	0.8352	0.3319	0.7582	1.0295	0.7989	0.6034	0.8214	0.6318	0.6956	0.4136	0.5589	0.6719	0.8077	1.3014	1.1797	0.1494	0.6931	1.3517	0.3788	1.3173	0.6108	0.606	0.5561	0.5898	0.7732	1.0271	0.4507	1.2104	0.3596	0.7668	0.5312	0.4155	0.3961
0.831738	0.329436	0.517516	0.164254	0.535881	0.176244	0.422213	0.138207		66	1.0553	1.0919	1.4858	0.8496	0.8234	1.0671	0.9848	0.8537	0.3528	0.7753	1.1294	0.7742	0.6367	0.8345	0.6493	0.7125	0.3392	0.5651	0.6884	0.8194	1.3235	1.1871	0.1499	0.7025	1.3501	0.3331	1.3575	0.6442	0.6605	0.7068	0.6128	0.7334	1.0126	0.4263	1.2303	0.3372	0.7954	0.4429	0.4192	0.4216
0.845487	0.329864	0.510222	0.167494	0.55606	0.177004	0.431938	0.144787		67	1.308	1.1666	1.3837	0.8722	0.9008	1.1193	0.9892	0.9266	0.3814	0.809	1.0901	0.7913	0.7	0.7669	0.6961	0.7795	0.3158	0.5098	0.6842	0.8024	1.2448	1.2155	0.1862	0.6728	1.5008	0.3085	1.2989	0.5744	0.6805	0.6466	0.6013	0.7549	1.0029	0.455	1.2812	0.3397	0.7945	0.5757	0.4281	0.4314
0.866283	0.348193	0.509549	0.152757	0.565158	0.180621	0.438033	0.141431		68	1.1138	1.1033	1.3812	0.8098	0.943	1.1131	1.0098	0.9657	0.4122	0.8563	1.1624	0.8358	0.7353	0.81	0.733	0.7939	0.3699	0.5458	0.6518	0.7971	1.3959	1.1075	0.2176	0.6855	1.8737	0.3603	1.3457	0.5624	0.7479	0.5525	0.5664	0.6977	1.0105	0.452	1.3635	0.3184	0.8087	0.6959	0.4762	0.4612
0.878906	0.358329	0.501156	0.151415	0.582035	0.182111	0.443153	0.144649		69	1.0767	1.2191	1.4848	0.8191	1.0089	1.0047	0.9933	0.8866	0.506	0.8585	1.1449	0.8318	0.7399	0.7969	0.7211	0.7798	0.3191	0.4949	0.7557	0.8251	1.5472	1.1252	0.285	0.6726	1.8977	0.3294	1.3992	0.5137	0.6603	0.6814	0.5983	0.7084	1.0082	0.5355	1.3802	0.3328	0.7594	0.6905	0.5136	0.4783
0.897931	0.359183	0.498524	0.160503	0.589467	0.183115	0.447295	0.152897		70	1.2985	1.2223	1.4844	0.8558	1.1161	0.9153	1.1426	0.8902	0.5248	0.9567	1.3243	0.7905	0.6922	0.7633	0.7379	0.8813	0.3645	0.5198	0.7451	0.8142	1.4418	1.1053	0.2589	0.6623	1.7449	0.3833	1.4576	0.4991	0.8093	0.8292	0.5848	0.5961	1.0434	0.4996	1.4348	0.2793	0.7919	0.7472	0.5245	0.4952
0.8992	0.376558	0.493079	0.150076	0.595073	0.193988	0.455394	0.148182		71	1.1381	1.2567	1.5269	0.8713	1.1868	0.9356	1.0717	0.959	0.4936	0.9661	1.4983	0.7583	0.4754	0.7445	0.777	0.8098	0.3258	0.5422	0.846	0.8527	1.4755	1.1016	0.2885	0.7434	1.7653	0.3683	1.5518	0.3602	0.9283	0.7831	0.606	0.504	1.0101	0.4902	1.2961	0.2486	0.8375	0.8413	0.4989	0.5306
0.878619	0.369125	0.500332	0.160919	0.595585	0.19409	0.464964	0.169103		72	1.2905	1.2365	1.4713	0.8918	1.1331	0.9055	1.0681	0.8883	0.5908	1.0129	1.2142	0.7699	0.4253	0.6987	0.8312	0.8424	0.3062	0.599	0.8694	0.8736	1.6285	1.0703	0.2981	0.7087	1.6847	0.2999	1.5272	0.3503	0.9514	0.6905	0.6191	0.4999	0.9914	0.45	0.7917	0.2152	0.8643	0.7981	0.4692	0.5594
0.891773	0.388487	0.510776	0.177378	0.613906	0.207054	0.481265	0.18781		73	1.4162	1.2648	1.539	0.7725	1.2088	0.7923	1.0307	0.8768	0.6411	0.9468	1.4274	0.7522	0.3979	0.7382	0.827	0.8743	0.3507	0.4977	0.8471	0.8653	1.7793	1.17	0.2919	0.7417	1.6838	0.2988	1.5257	0.3786	0.9249	0.7342	0.6376	0.5694	0.9096	0.4647	0.8439	0.2482	0.8552	0.9109	0.4572	0.6068
0.880098	0.364546	0.536023	0.222271	0.610492	0.193809	0.501434	0.216284		74	1.171	1.1704	1.3786	0.8445	1.1205	0.7553	1.0962	0.8825	0.6188	0.9683	1.5204	0.7147	0.3908	0.7776	0.8635	0.7833	0.3201	0.5963	0.8531	0.9747	1.7662	1.2026	0.2578	0.8003	1.5195	0.2905	1.5039	0.4565	0.8633	0.8784	0.6188	0.6102	0.8384	0.4858	1.0128	0.2593	0.873	1.0286	0.4328	0.6192
0.88484	0.363293	0.533556	0.207354	0.617725	0.192566	0.509876	0.211708		75	1.2798	1.2251	1.4334	0.8713	0.9576	0.7147	0.9863	0.7709	0.6315	1.1139	1.5581	0.7403	0.3364	0.8401	0.8312	0.8228	0.4245	0.5894	0.8743	0.9793	1.7142	1.2289	0.2696	0.7829	1.6845	0.3148	1.3701	0.459	0.7449	0.847	0.6103	0.5986	0.8205	0.4692	0.987	0.3753	0.9111	0.9266	0.441	0.6797
0.883025	0.36829	0.551498	0.235023	0.621558	0.189064	0.528069	0.271898		76	1.3236	1.2011	1.5356	0.93	0.8586	0.6616	0.9419	0.6642	0.7151	1.1706	1.4663	0.696	0.3701	0.8749	0.9252	0.7898	0.3583	0.6419	0.7876	1.0786	1.7697	1.2297	0.2331	0.7997	1.664	0.3801	1.3064	0.4596	0.6801	0.7658	0.6448	0.5641	0.7234	0.4701	1.2727	0.4446	0.8583	0.9657	0.4285	0.608
0.869369	0.357465	0.569842	0.252006	0.624365	0.20168	0.537247	0.296141		77	1.2971	1.2158	1.4128	0.8631	0.9897	0.6937	0.9975	0.6295	0.6755	1.1614	1.4764	0.7381	0.4045	0.7615	0.8789	0.7641	0.3766	0.5755	0.8477	0.9535	1.6376	1.1657	0.2542	0.8376	1.6819	0.3862	1.223	0.452	0.6661	0.7114	0.6614	0.4627	0.8198	0.4782	1.3547	0.5277	0.8485	0.8629	0.4201	0.6003
0.866065	0.359663	0.597304	0.275015	0.628712	0.204829	0.550158	0.310826		78	1.2834	1.1595	1.2149	0.8956	0.9378	0.6505	1.0042	0.5501	0.678	1.0828	1.3062	0.7458	0.4161	0.7115	0.9592	0.6968	0.4066	0.6724	0.7659	0.9906	1.7431	1.2415	0.2477	0.7836	1.8924	0.3297	1.1541	0.4208	0.627	0.8091	0.611	0.5382	0.9022	0.4989	1.3789	0.5196	0.8579	0.8362	0.4531	0.5941
0.86424	0.359182	0.616219	0.286565	0.640192	0.216654	0.549588	0.301553		79	1.1996	1.2205	1.491	0.8396	0.9787	0.6214	0.9681	0.4904	0.8512	1.1089	1.167	0.6978	0.4865	0.7728	0.9806	0.8251	0.3787	0.6756	0.6946	0.8889	1.6605	1.2345	0.3769	0.8149	1.755	0.3605	1.2063	0.376	0.5842	0.9052	0.5924	0.5385	0.9383	0.4597	1.5347	0.4488	0.7914	0.9063	0.4271	0.5274
0.836565	0.332064	0.640018	0.267732	0.625333	0.203822	0.555236	0.255018		80	1.1937	0.9535	1.1292	0.9239	0.9527	0.5776	1.0618	0.4791	0.8208	1.1937	1.0531	0.7732	0.5091	0.6223	0.9676	0.7784	0.4221	0.7501	0.6233	0.8936	1.6185	1.233	0.2514	0.8193	1.6376	0.3578	1.1886	0.4608	0.532	0.7813	0.6373	0.5955	1.0559	0.4005	1.2721	0.3805	0.7763	0.8325	0.465	0.5425
0.844379	0.367351	0.642047	0.260839	0.632238	0.212795	0.551785	0.242898		81	1.2342	1.0855	1.4068	0.8366	1.2514	0.5618	0.9831	0.4696	0.7522	1.2499	1.0117	0.7365	0.5061	0.6318	1.0804	0.7374	0.3895	0.6977	0.6511	0.9825	1.766	1.2265	0.2613	0.819	1.6873	0.3557	1.2362	0.3828	0.5607	1.0819	0.5285	0.6291	0.9168	0.3405	1.2667	0.3179	0.7576	0.7336	0.3805	0.533
0.834242	0.364417	0.645113	0.246994	0.636029	0.221649	0.553489	0.22779		82	1.1436	0.9796	1.359	0.9185	1.048	0.5784	0.9037	0.4193	0.7566	1.2637	1.1266	0.7649	0.5266	0.7102	1.0155	0.8711	0.3413	0.7265	0.6019	0.8624	1.7788	1.2153	0.3391	0.7725	1.8739	0.3671	1.1852	0.3997	0.5367	0.8849	0.4936	0.526	1.0059	0.3304	1.1161	0.4143	0.7773	0.7898	0.3422	0.5119
0.817669	0.361278	0.658353	0.257419	0.630813	0.221056	0.559934	0.213689		83	1.2967	0.9677	1.3089	0.7997	1.1537	0.5858	0.9559	0.4084	0.6672	1.3245	0.9411	0.731	0.5132	0.5462	1.0744	0.8263	0.396	0.6944	0.6264	0.8738	1.5886	1.2291	0.2533	0.759	1.8246	0.3281	1.2133	0.4616	0.5241	1.0308	0.4903	0.6146	1.0262	0.3156	0.8612	0.4422	0.6386	0.6418	0.3373	0.5148
0.797618	0.350592	0.674234	0.265045	0.617758	0.235149	0.566056	0.202985		84	1.0876	0.7837	1.2688	0.7892	1.1997	0.5502	0.9475	0.4478	0.62	1.2259	1.0159	0.7026	0.4855	0.6227	1.0733	0.7954	0.398	0.6889	0.5817	0.8963	1.6294	1.2112	0.09798	0.7437	1.6549	0.3476	1.1492	0.4191	0.5183	1.1453	0.5103	0.5374	1.1477	0.3453	0.8418	0.472	0.6373	0.6556	0.3394	0.5228
0.814425	0.365255	0.674658	0.244732	0.631656	0.226565	0.564898	0.18297		85	1.152	0.7855	1.3139	0.6134	1.2322	0.4879	0.889	0.5139	0.6672	1.2811	0.9711	0.792	0.5071	0.4918	1.0125	0.822	0.3655	0.6792	0.559	0.8527	1.7406	1.1129	0.1194	0.827	1.582	0.4153	1.097	0.3999	0.5024	1.6347	0.5852	0.5621	1.2871	0.397	0.9156	0.5099	0.6053	0.6751	0.3817	0.4961
0.812029	0.334874	0.693487	0.259522	0.638196	0.227223	0.576642	0.182907		86	1.1729	0.8216	1.2259	0.6756	1.1278	0.4753	0.8683	0.5559	0.7319	1.2062	0.964	0.7541	0.5354	0.5475	0.9715	0.7797	0.3277	0.6714	0.5601	0.9019	1.6297	1.0867	0.1087	0.7554	1.521	0.3327	1.1938	0.4817	0.4245	1.4441	0.7683	0.5302	1.1772	0.5883	1.0047	0.5096	0.5995	0.7235	0.3829	0.5653
0.815704	0.370728	0.681842	0.265582	0.643533	0.242689	0.566488	0.177643		87	1.1106	0.7451	1.3718	0.6722	1.0731	0.5127	0.8946	0.6411	0.707	1.2168	0.9185	0.7425	0.4393	0.482	1.0616	0.8602	0.3178	0.5555	0.546	0.8329	1.855	1.0307	0.1292	0.7108	1.7158	0.3163	1.1477	0.5238	0.407	1.6456	0.8326	0.4835	1.2012	0.5857	0.8568	0.6238	0.5886	0.7413	0.4045	0.5244
0.787925	0.344951	0.680562	0.271329	0.638729	0.246427	0.56186	0.186027		88	1.0299	0.7245	1.1008	0.6258	1.0159	0.5721	0.9066	0.5667	0.6416	1.2461	0.8763	0.6978	0.5005	0.4799	1.0119	0.7356	0.338	0.5321	0.5448	0.8585	1.5576	1.0535	0.1168	0.7348	1.6674	0.2995	1.2347	0.4575	0.3932	1.3492	0.7726	0.3688	1.1565	0.5941	0.9597	0.5803	0.6263	0.6053	0.3878	0.6043
0.776781	0.343947	0.705216	0.291112	0.639492	0.257823	0.574582	0.178737		89	1.0585	0.7855	1.2002	0.5947	0.9411	0.6406	0.8822	0.5581	0.7256	1.1865	0.7358	0.6565	0.5031	0.4694	0.9927	0.7645	0.2956	0.4211	0.5141	0.8928	1.5808	1.0492	0.1055	0.7344	1.692	0.239	1.0938	0.5249	0.3701	1.0968	0.726	0.2657	1.1874	0.454	0.8735	0.6069	0.681	0.5885	0.3962	0.5691
0.761217	0.341974	0.722507	0.289039	0.626394	0.2523	0.585698	0.184642		90	0.838	0.6596	0.9037	0.6071	0.8921	0.5997	0.8439	0.5765	0.7107	1.2648	0.7798	0.6847	0.4799	0.4479	1.0452	0.7572	0.3338	0.4253	0.5767	0.812	1.7941	1.0648	0.102	0.7198	1.6045	0.289	1.0918	0.4626	0.3725	1.149	0.7238	0.2542	1.131	0.3935	1.0331	0.572	0.6269	0.6171	0.4103	0.6089
0.753596	0.36198	0.728902	0.295465	0.614787	0.250956	0.604438	0.186954		91	1.0242	0.6658	0.8962	0.5486	0.9687	0.468	0.8585	0.5451	0.6448	1.2689	0.7467	0.6815	0.5671	0.4344	0.9679	0.7538	0.3376	0.4176	0.5291	0.7848	1.6557	1.0807	0.1406	0.7386	1.8324	0.3099	1.266	0.3554	0.3493	1.2124	0.6698	0.2533	1.1572	0.3825	0.8295	0.5685	0.6455	0.5919	0.4221	0.5711
0.749649	0.354966	0.73052	0.295147	0.618033	0.2509	0.611562	0.211744		92	1.0772	0.8031	0.973	0.4743	0.8505	0.532	0.9523	0.545	0.7542	1.2872	0.5884	0.6858	0.5176	0.4513	0.917	0.6604	0.3218	0.4091	0.5603	0.8188	1.6037	1.0611	0.09893	0.7384	1.8685	0.2805	1.0545	0.4053	0.3222	1.1897	0.6363	0.2217	1.1068	0.4584	0.7562	0.5275	0.6716	0.5337	0.447	0.5533
0.740114	0.345793	0.748291	0.300797	0.618556	0.255433	0.632142	0.221616		93	0.9246	0.5926	0.9586	0.4345	0.7572	0.5082	0.9558	0.5183	0.7365	1.2018	0.7083	0.6698	0.5751	0.3489	0.8985	0.7577	0.3049	0.4969	0.637	0.6729	1.4101	1.0725	0.09798	0.7222	2.0291	0.3321	1.0791	0.3359	0.3645	0.7675	0.6085	0.298	1.1341	0.4917	0.7251	0.6922	0.6585	0.6651	0.4267	0.6118
0.741004	0.344403	0.718338	0.294349	0.618996	0.267611	0.597887	0.217336		94	0.9228	0.6989	0.9169	0.4937	0.7224	0.6033	1.0674	0.5585	0.672	1.2905	0.5933	0.6827	0.4826	0.4217	0.9459	0.7973	0.2496	0.4432	0.5962	0.7607	1.355	1.0792	0.1684	0.7485	1.9303	0.2969	1.0172	0.3076	0.3322	0.9247	0.7181	0.2426	1.0813	0.3979	0.7068	0.7532	0.7499	0.6805	0.4316	0.5613
0.728873	0.336358	0.716136	0.340796	0.624415	0.270836	0.579949	0.23504		95	0.9791	0.6979	0.6618	0.4722	0.6114	0.5772	1.0301	0.4959	0.7673	1.2127	0.5355	0.6437	0.5731	0.4223	0.9385	0.7861	0.2716	0.4765	0.5976	0.6716	1.3856	1.0361	0.2492	0.7354	1.7941	0.2852	1.1118	0.2606	0.3228	0.9484	0.676	0.218	0.9697	0.419	0.7072	0.71	0.6951	0.6495	0.4516	0.579
0.722879	0.356483	0.768489	0.366981	0.613231	0.282966	0.665109	0.358513		96	0.8783	0.6353	0.6623	0.4425	0.6652	0.5784	0.9465	0.3878	0.6767	1.1564	0.4063	0.6434	0.5354	0.5808	0.9115	0.7884	0.2558	0.3363	0.5356	0.7278	1.4051	1.1055	0.2531	0.7305	2.0474	0.3026	1.1148	0.2585	0.3353	1.178	0.6899	0.3225	0.9078	0.2859	0.5444	0.7487	0.6918	0.6674	0.5171	0.5808
0.70616	0.341549	0.778327	0.391824	0.606344	0.278471	0.666544	0.366626		97	1.1109	0.5653	0.5587	0.4627	0.518	0.5676	0.9402	0.4645	0.6641	1.1856	0.4619	0.5614	0.4551	0.5479	0.8843	0.7191	0.2232	0.3923	0.5131	0.6614	1.2807	1.1068	0.2818	0.8033	1.9419	0.4115	1.0848	0.2485	0.3186	1.1501	0.6205	0.2115	0.7355	0.3344	0.7277	0.7765	0.7069	0.7428	0.4289	0.6125
0.718737	0.367899	0.768716	0.374726	0.611022	0.282299	0.668778	0.321518		98	0.9193	0.6342	0.5186	0.4641	0.6349	0.5416	0.9036	0.4508	0.6471	1.3356	0.6098	0.6714	0.55	0.4168	0.8343	0.9465	0.2296	0.5191	0.5141	0.6214	1.4153	1.1276	0.2076	0.7214	1.9602	0.3613	1.1611	0.2598	0.3082	1.4511	0.7032	0.2348	0.65	0.4179	0.6417	0.5673	0.7017	0.7879	0.4596	0.5908
0.685442	0.334993	0.762396	0.354465	0.59867	0.281611	0.666469	0.298258		99	0.8679	0.5726	0.5502	0.4624	0.9056	0.2888	0.9305	0.3622	0.6557	1.1967	0.6997	0.6324	0.4959	0.3694	0.8024	0.8253	0.2649	0.407	0.4687	0.6286	1.2359	0.8734	0.1925	0.776	1.8981	0.3154	1.1858	0.2476	0.2768	0.9969	0.5922	0.2329	0.8018	0.5696	0.5685	0.6333	0.7433	0.7582	0.4546	0.5849
0.707594	0.350123	0.758989	0.423116	0.604533	0.263458	0.653549	0.329923		100	0.8368	0.53	0.4644	0.4912	0.8539	0.4448	0.9841	0.3767	0.6508	1.2543	0.5954	0.681	0.4868	0.3062	0.7734	0.8639	0.2924	0.3837	0.5482	0.6384	1.2841	0.8587	0.3132	0.7052	2.0499	0.29	1.0359	0.2375	0.3181	1.1068	0.5335	0.3419	0.5631	0.6213	0.8374	0.7707	0.7073	0.9388	0.5884	0.5844
0.706765	0.335071	0.752265	0.326323	0.613588	0.268063	0.65585	0.303186		101	0.8317	0.6402	0.5838	0.4266	0.9039	0.2857	0.9816	0.3895	0.8077	1.0841	0.6328	0.6885	0.472	0.4079	0.7809	0.8609	0.2132	0.4486	0.5905	0.5794	1.2643	0.8163	0.2602	0.6803	1.9087	0.3106	1.1352	0.2152	0.3316	1.053	0.5774	0.3501	0.5815	0.6823	0.7008	0.695	0.7395	0.9794	0.5249	0.5585
0.711502	0.349762	0.754127	0.325554	0.615611	0.266031	0.667196	0.306439		102	1.0115	0.5823	0.5489	0.4396	0.8691	0.4097	0.9635	0.4037	0.8359	1.2245	0.7303	0.6853	0.5228	0.3834	0.7873	0.7793	0.1872	0.3459	0.6116	0.5634	1.3201	0.8172	0.309	0.6966	1.9653	0.4382	1.1359	0.1975	0.2846	1.1561	0.5861	0.3494	0.5773	0.6798	0.7792	0.5988	0.6925	1.0085	0.5535	0.3507
0.69606	0.357298	0.775285	0.432137	0.606985	0.278798	0.678266	0.35636		103	0.9207	0.4518	0.5142	0.3404	0.8364	0.3805	0.9076	0.3347	0.7052	1.1816	0.5963	0.6807	0.4372	0.4602	0.6928	0.8024	0.1583	0.3652	0.5653	0.5513	1.2835	0.8017	0.1755	0.6985	1.9517	0.3476	1.1124	0.232	0.3052	1.2841	0.6316	0.4116	0.579	0.7808	0.7274	0.6772	0.7289	1.0134	0.6738	0.3846
0.678971	0.361354	0.780261	0.430589	0.594715	0.260232	0.689216	0.402304		104	1.0091	0.5347	0.5	0.3375	0.6683	0.3394	0.9605	0.2919	0.5787	1.2076	0.693	0.7279	0.3856	0.403	0.6694	0.7875	0.2248	0.3895	0.5771	0.4797	1.2276	0.7049	0.1452	0.5874	1.8631	0.281	1.1125	0.2516	0.298	1.4751	0.6189	0.3671	0.4909	0.7403	0.6432	0.6072	0.6428	1.2415	0.7289	0.4346
0.686837	0.339288	0.777161	0.393686	0.602987	0.254305	0.694236	0.400643		105	0.9734	0.4648	0.448	0.3665	0.7329	0.2424	1.0236	0.3582	0.7815	1.2277	0.8699	0.6925	0.395	0.5126	0.6231	0.8043	0.2487	0.532	0.4863	0.563	1.0983	0.7568	0.2708	0.5863	1.8311	0.3672	1.1163	0.2437	0.342	1.3744	0.559	0.3632	0.4828	0.7743	0.6824	0.7366	0.661	0.9847	0.7621	0.4631
0.663246	0.328547	0.787872	0.396378	0.591194	0.245467	0.692732	0.386723		106	0.7951	0.4479	0.5152	0.4605	0.6524	0.314	0.8104	0.3192	0.8168	1.1845	0.8183	0.6956	0.3205	0.5	0.6331	0.8672	0.2131	0.387	0.5429	0.4566	0.9621	0.6658	0.2019	0.4693	1.8636	0.3538	1.1533	0.2307	0.346	1.1334	0.6369	0.2871	0.53	0.8053	0.8376	0.6988	0.6743	0.9731	0.7242	0.5156
0.663746	0.353535	0.768508	0.381595	0.58308	0.263484	0.687986	0.379043		107	0.7861	0.4078	0.4312	0.4331	0.462	0.3917	0.7102	0.2113	0.6011	1.3064	0.7909	0.7726	0.3757	0.3621	0.6158	0.9641	0.2527	0.2774	0.4687	0.5881	1.1266	0.7812	0.1245	0.5034	1.962	0.3614	1.2101	0.2082	0.4223	1.1872	0.7127	0.4247	0.4108	0.9186	0.7623	0.5258	0.6707	0.9771	0.6741	0.4091
[truncated: 149 more columns]
