# Supplementary material for: Hypoxia controls plasma membrane targeting of polarity proteins by dynamic turnover of PI4P and PI(4,5)P2
Source: eLife. 2022 Jun 9;11:e79582. doi: 10.7554/eLife.79582 (PMC9242647; doi:10.7554/eLife.79582)
Supplement: Figure 7—source data 5. [file elife-79582-fig7-data5.xlsx]

## Sheet: Figure 7D MLR#
Figure 7 Souce Data 5
Time	DMSO	WM
1	0.990821	1.0008
2	0.981608	0.999935
3	0.996261	0.99122
4	1.01199	1.00263
5	1.01934	1.00542
6	0.989803	0.976115
7	0.967347	0.922385
8	0.936568	0.828012
9	0.899608	0.688478
10	0.810437	0.5491
11	0.670937	0.468278
12	0.516721	0.434882
13	0.419508	0.421465
14	0.372066	0.417645
15	0.355029	0.417515
16	0.346605	0.416193
17	0.344637	0.416137
18	0.345584	0.41622
19	0.345889	0.421192
20	0.349579	0.417092
21	0.350458	0.421548
22	0.35075	0.42511
23	0.351997	0.429127
24	0.354971	0.43088
25	0.354003	0.431505
26	0.358197	0.435828
27	0.359534	0.436692
28	0.359732	0.440698
29	0.359621	0.441368
30	0.361932	0.444905
31	0.362808	0.447025
32	0.363842	0.447013
33	0.364342	0.450952
34	0.366579	0.454615
35	0.367353	0.458025
36	0.368566	0.459807
37	0.369434	0.46183
38	0.373571	0.46422
39	0.375074	0.46908
40	0.374889	0.4728
41	0.378487	0.477675
42	0.378429	0.477258
43	0.383332	0.480015
44	0.387871	0.484103
45	0.389276	0.486787
46	0.393829	0.493775
47	0.395213	0.492642
48	0.397439	0.496095
49	0.399882	0.500785
50	0.402047	0.505112
51	0.405329	0.506987
52	0.408676	0.511902
53	0.413613	0.519967
54	0.417803	0.522702
55	0.422187	0.52819
56	0.423137	0.532368
57	0.424603	0.53314
58	0.428216	0.53884
59	0.357258	0.550349
60	0.350863	0.448804
61	0.366561	0.439619
62	0.364229	0.445151
63	0.363997	0.446472
64	0.364308	0.504034
65	0.369382	0.46049
66	0.3722	0.456406
67	0.381389	0.468737
68	0.387345	0.481417
69	0.404363	0.499272
70	0.424516	0.524383
71	0.452445	0.554234
72	0.486837	0.597315
73	0.524824	0.645196
74	0.566905	0.696572
75	0.60985	0.7536
76	0.655003	0.807515
77	0.696547	0.851109
78	0.729874	0.923714
79	0.758584	0.971392
80	0.788647	1.00173
81	0.808187	1.01848
82	0.835345	1.02511
83	0.863208	1.037
84	0.881889	1.04148
85	0.905047	1.03737
86	0.926918	1.03963
87	0.960495	1.05146
88	0.988426	1.06588
89	1.01451	1.07932
90	1.03101	1.09635
91	1.00019	1.11893
92	1.03704	1.14176
93	1.02636	1.12643
94	1.03925	1.16044
95	1.04509	1.17287
96	1.04151	1.16766
97	1.04526	1.1587
98	1.02721	1.16173
99	1.0088	1.16809
100	1.0439	1.17219
101	1.02209	1.18521
102	1.02075	1.19463
103	1.02816	1.20522
104	1.0153	1.21285
105	1.02678	1.21924
106	1.08488	1.22815
107	1.06321	1.22948
108	1.02718	1.23376
109	1.04611	1.23004
110	1.03827	1.23603
