# Supplementary material for: Hypoxia controls plasma membrane targeting of polarity proteins by dynamic turnover of PI4P and PI(4,5)P2
Source: eLife. 2022 Jun 9;11:e79582. doi: 10.7554/eLife.79582 (PMC9242647; doi:10.7554/eLife.79582)
Supplement: Figure 7—source data 6. [file elife-79582-fig7-data6.xlsx]

## Sheet: Figure 7-fig supp 1A
Figure 7 Souce Data 6
				1	2	3	4	5	6	7	8
AVG	STDEV
			min																												min
1	0		0	1	1	1	1	1	1	1	1																				1
0.860325	0.0535618		3	0.8278	0.8883	0.7518	0.8946	0.9135	0.8881	0.8302	0.8883																				2
0.837962	0.0266471		6	0.8054	0.8851	0.8076	0.8369	0.8548	0.8457	0.8201	0.8481																				3
0.8294	0.0314859		9	0.783	0.8847	0.8009	0.8396	0.8501	0.8404	0.8156	0.8209																				4
0.825488	0.0194103		13	0.8076	0.8489	0.7941	0.8392	0.8443	0.8257	0.8116	0.8325																				5
0.822113	0.0332678		17	0.7934	0.8627	0.7726	0.8284	0.8704	0.8207	0.8015	0.8272																				6
0.817788	0.0318279		20	0.7822	0.8603	0.7801	0.8367	0.8491	0.8166	0.7853	0.832																				7
0.820938	0.0295651		24	0.8069	0.8625	0.7687	0.8423	0.8349	0.8389	0.8002	0.8131																				8
0.809975	0.0290409		30	0.7911	0.8363	0.7748	0.8433	0.8408	0.8216	0.7744	0.7975																				9
0.809063	0.0253975		35	0.7751	0.8431	0.7773	0.8137	0.837	0.8167	0.7926	0.817																				10
0.803112	0.0213137		39	0.7813	0.8403	0.779	0.81	0.8199	0.8073	0.7833	0.8038																				11
0.8012	0.0224512		42	0.7672	0.826	0.7741	0.8253	0.8203	0.8021	0.7925	0.8021																				12
0.8036	0.0292826		46	0.7697	0.8424	0.775	0.8218	0.8353	0.818	0.7743	0.7923																				13
0.802837	0.02577		47.5	0.8005	0.838	0.7973	0.8147	0.8353	0.7962	0.7667	0.774																				14
0.813762	0.0243354		49	0.7891	0.8415	0.7777	0.8272	0.8366	0.816	0.7917	0.8303																				15
0.866788	0.12955		50.5	0.7669	0.9223	0.7756	0.8024	0.9621	0.8057	0.7688	1.1305																				16
1.02116	0.107065		52	0.8373	1.0182	0.9693	0.9587	1.128	1.0459	1.024	1.1879																				17
1.15671	0.0387415		53.5	1.1028	1.1926	1.1279	1.1863	1.2022	1.1473	1.1136	1.181																				18
1.18006	0.0417275		55	1.0976	1.2115	1.1492	1.1842	1.2259	1.1995	1.1654	1.2072																				19
1.21891	0.0494262		56.5	1.114	1.2667	1.1935	1.2303	1.2613	1.2252	1.2084	1.2519																				20
1.26031	0.0289867		58	1.2235	1.2883	1.2197	1.2784	1.3	1.2663	1.2583	1.248																				21
