# Supplementary material for: Hypoxia controls plasma membrane targeting of polarity proteins by dynamic turnover of PI4P and PI(4,5)P2
Source: eLife. 2022 Jun 9;11:e79582. doi: 10.7554/eLife.79582 (PMC9242647; doi:10.7554/eLife.79582)
Supplement: Figure 7—source data 7. [file elife-79582-fig7-data7.xlsx]

## Sheet: Figure 7-fig supp 1B
Figure 7 Souce Data 6
						1	2	3	4	5	6	7	8	9	10	11	12			1	2	3	4	5	6	7	8	9	10	11	12
GFP		MaLionR			GFP
AVG	STDEV	AVG	STDEV																MaLionR
t_C1_Cyto	t_C1_Cyto	t_C2_Cyto	t_C2_Cyto		min	t_C1_Cyto	t_C1_Cyto	t_C1_Cyto	t_C1_Cyto	t_C1_Cyto	t_C1_Cyto	t_C1_Cyto	t_C1_Cyto	t_C1_Cyto	t_C1_Cyto	t_C1_Cyto	t_C1_Cyto		min	t_C2_Cyto	t_C2_Cyto	t_C2_Cyto	t_C2_Cyto	t_C2_Cyto	t_C2_Cyto	t_C2_Cyto	t_C2_Cyto	t_C2_Cyto	t_C2_Cyto	t_C2_Cyto	t_C2_Cyto
1.01253	0.0104364	1.0032	0.0065811		1	1.0068	0.9952	1.0128	0.9986	1.0114	1.0121	1.0049	1.0152	1.0321	1.0251	1.0188	1.0174		1	1.0092	0.9923	1.0099	1.0012	1.0071	1.0104	1.0024	0.9986	1.0032	0.9967	0.9953	1.0121
0.987467	0.0104364	0.9968	0.0065811		2	0.9932	1.0048	0.9872	1.0014	0.9886	0.9879	0.9951	0.9848	0.9679	0.9749	0.9812	0.9826		2	0.9908	1.0077	0.9901	0.9988	0.9929	0.9896	0.9976	1.0014	0.9968	1.0033	1.0047	0.9879
0.992875	0.012246	0.999792	0.00841324		3	0.9982	1.0003	1.0037	1.0195	0.9911	0.9939	0.9887	0.9833	0.9848	0.9695	0.9925	0.989		3	0.9937	0.9897	0.9887	1.0154	0.9991	1.0027	0.9943	1.0062	1.0073	1.0084	0.9919	1.0001
0.990083	0.0187262	0.9906	0.0160793		4	0.9924	0.9989	1.0026	1.0297	0.9954	1.0065	0.9912	0.9761	0.9691	0.9672	0.9662	0.9857		4	0.9853	0.9819	0.9784	1.0217	0.9922	0.998	0.9716	0.9902	0.9997	1.0167	0.9763	0.9752
1.00286	0.012654	0.974817	0.0161817		5	0.9995	1.0094	1.0032	1.0385	0.9961	1.0062	0.9973	0.9904	1.0065	0.9987	0.997	0.9915		5	0.9779	0.9777	0.955	1.0055	0.9778	0.9763	0.9627	0.9811	0.9804	0.9955	0.9532	0.9547
1.0013	0.0193982	0.974867	0.0214142		6	1.0027	1.0122	1.0075	1.0277	1.002	1.0104	0.9866	0.9912	1.0356	0.9653	0.9848	0.9896		6	0.9735	0.9758	0.9624	1.0063	0.9798	0.9672	0.9554	0.9737	1.0194	0.9821	0.9392	0.9636
0.997675	0.0310305	0.970067	0.0202235		7	1.0025	1.0019	1.0094	1.0303	0.9936	1.0068	0.9914	0.9807	1.0564	0.9264	0.9946	0.9781		7	0.9701	0.9742	0.9599	0.9973	0.9715	0.9791	0.9644	0.9567	1.016	0.9565	0.9434	0.9517
1.003	0.0361274	0.959125	0.0266332		8	1.0054	1.014	1.0206	1.0296	0.9909	1.0557	1.0023	0.9834	1.0487	0.9202	0.9746	0.9906		8	0.9494	0.9566	0.9495	0.9873	0.957	0.9931	0.9615	0.9532	1.0127	0.9213	0.9291	0.9388
1.00639	0.0488853	0.955658	0.0295319		9	1.0028	1.0083	1.0198	1.0326	0.9928	1.089	0.9903	0.987	1.0719	0.8915	0.9918	0.9989		9	0.9476	0.9536	0.9416	0.9795	0.9504	0.9975	0.9533	0.9391	1.021	0.9209	0.9256	0.9378
1.00777	0.0449994	0.950508	0.0323997		10	1.0047	1.0103	1.0225	1.0173	0.9907	1.0872	0.9951	0.9806	1.0744	0.9082	1.0032	0.999		10	0.9458	0.9475	0.9299	0.9654	0.9415	1.0055	0.9312	0.9343	1.0239	0.9225	0.9239	0.9347
1.01094	0.0485611	0.943367	0.0401121		11	1.0084	1.0092	1.0261	1.0047	0.9913	1.1304	0.9937	0.9948	1.0494	0.9169	1.0048	1.0016		11	0.9418	0.9401	0.9216	0.9494	0.9376	1.0387	0.9221	0.9281	1.005	0.9078	0.8969	0.9313
1.01303	0.046935	0.936567	0.0379156		12	1.0089	1.0246	1.0194	0.9762	0.9865	1.1169	0.9977	0.9936	1.0926	0.9557	0.9855	0.9988		12	0.9385	0.9453	0.9122	0.9123	0.9292	1.0134	0.9121	0.9205	1.0056	0.9368	0.8824	0.9305
1.01652	0.0568682	0.937542	0.0439953		13	1.0146	1.0255	1.011	0.9386	0.9924	1.1742	1.0045	0.9869	1.0585	0.995	0.9937	1.0033		13	0.9339	0.9454	0.8973	0.8782	0.9266	1.0368	0.9241	0.9186	1.0048	0.9426	0.9057	0.9365
1.01166	0.065157	0.94095	0.0529997		14	1.015	1.0347	1.0015	0.9156	0.9899	1.1834	0.9985	0.9984	1.0632	0.958	0.9982	0.9835		14	0.9406	0.9496	0.8903	0.869	0.9251	1.068	0.9236	0.9243	1.0074	0.9606	0.9091	0.9238
1.02203	0.0824171	0.945233	0.0671756		15	1.0187	1.0359	1.018	0.9075	0.9839	1.2522	0.9978	0.9955	1.0768	0.9893	0.9891	0.9996		15	0.945	0.9553	0.9042	0.862	0.9211	1.1225	0.9257	0.9202	1.0043	0.974	0.8934	0.9151
1.02382	0.109014	0.94885	0.090008		16	1.0122	1.0304	1.021	0.8755	0.9866	1.3403	0.9903	0.9949	1.0623	0.9996	0.9773	0.9955		16	0.9354	0.9419	0.9089	0.8438	0.9156	1.2034	0.9166	0.9197	0.9913	0.999	0.892	0.9186
1.03953	0.138601	0.961375	0.115427		17	1.0188	1.0364	1.0313	0.8828	0.9797	1.4546	0.9881	0.9883	1.0757	1.0219	0.9914	1.0053		17	0.9436	0.9478	0.9098	0.8472	0.9123	1.2957	0.9088	0.9137	1.0212	1.01	0.8965	0.9299
1.04468	0.152954	0.963867	0.128452		18	1.0111	1.0396	1.0329	0.8751	0.9806	1.5014	0.99	0.9972	1.0885	1.0512	0.9773	0.9913		18	0.9317	0.9503	0.9251	0.8351	0.9096	1.3377	0.9099	0.9208	1.0221	1.0204	0.8868	0.9169
1.04621	0.15554	0.971458	0.130368		19	1.0132	1.0408	1.0351	0.8806	0.9804	1.5096	0.9814	0.9958	1.1024	1.0452	0.9627	1.0073		19	0.9321	0.9611	0.941	0.8594	0.913	1.3511	0.9092	0.9227	1.0328	1.0285	0.8741	0.9325
1.05473	0.162045	0.972633	0.132719		20	1.0148	1.0462	1.0369	0.9195	0.9778	1.5502	0.9927	0.9946	1.0935	1.0479	0.9841	0.9985		20	0.9324	0.9563	0.9319	0.8908	0.9052	1.3676	0.9115	0.9224	1.0212	1.0288	0.8778	0.9257
1.05513	0.155275	0.976858	0.122878		21	1.0172	1.0509	1.0332	0.9628	0.9821	1.5379	0.9898	0.9935	1.0726	1.0317	0.9855	1.0043		21	0.9304	0.9612	0.9488	0.9392	0.9081	1.35	0.9149	0.9196	1.0031	1.0141	0.8938	0.9391
1.05038	0.139881	0.974967	0.117809		22	1.0142	1.0455	1.0414	0.9857	0.9769	1.4864	0.9877	0.9892	1.0608	1.0152	0.9911	1.0105		22	0.9274	0.953	0.9572	0.9392	0.9028	1.3374	0.9202	0.9228	0.9957	0.9944	0.915	0.9345
1.04499	0.150016	0.9648	0.124357		23	1.008	1.0381	1.0499	0.9795	0.973	1.5119	0.9873	0.9956	1.0525	0.9774	0.9654	1.0013		23	0.9007	0.9304	0.9658	0.9492	0.8972	1.3477	0.9115	0.9148	0.9846	0.9627	0.8858	0.9272
1.03197	0.156875	0.969642	0.130237		24	0.9997	1.0212	1.0197	0.9775	0.9584	1.5244	0.9696	0.9791	1.0214	0.9564	0.9674	0.9889		24	0.908	0.926	0.9632	0.9584	0.9062	1.3723	0.9191	0.925	0.9876	0.9593	0.8799	0.9307
1.02629	0.157235	0.950858	0.124348		25	0.9972	1.0172	1.0139	0.9678	0.9489	1.5167	0.9698	0.964	1.0325	0.9432	0.9489	0.9954		25	0.8772	0.9025	0.9491	0.9323	0.894	1.3327	0.9059	0.9142	0.9766	0.9489	0.8648	0.9121
1.02112	0.158184	0.922708	0.130619		26	0.9983	1.0153	1.0008	0.9301	0.9531	1.5135	0.9643	0.9615	1.0334	0.9446	0.9498	0.9887		26	0.8379	0.8685	0.9156	0.8847	0.8825	1.3216	0.8896	0.8929	0.9625	0.9162	0.8257	0.8748
1.01955	0.155668	0.890817	0.127069		27	0.9975	1.0143	0.9944	0.9238	0.9491	1.501	0.9655	0.957	1.051	0.9366	0.96	0.9844		27	0.7904	0.8313	0.88	0.8592	0.8627	1.2757	0.868	0.8658	0.9268	0.8959	0.8	0.834
1.01619	0.156972	0.849875	0.130409		28	0.9949	1.0099	0.9907	0.9043	0.9525	1.5017	0.9677	0.9586	1.0437	0.9424	0.9522	0.9757		28	0.7343	0.777	0.8459	0.8117	0.8341	1.2383	0.8411	0.8396	0.8947	0.8467	0.7625	0.7726
1.01328	0.159975	0.802533	0.133411		29	1.0026	1.0111	0.9839	0.8872	0.9469	1.5063	0.9703	0.9472	1.0339	0.9446	0.9442	0.9812		29	0.6778	0.7185	0.7981	0.7457	0.7978	1.1849	0.8265	0.8043	0.8555	0.8166	0.6983	0.7064
1.01233	0.159672	0.74135	0.131327		30	0.9971	1.0129	0.9886	0.8763	0.9482	1.5013	0.9713	0.9508	1.0414	0.9499	0.9308	0.9794		30	0.601	0.6574	0.7438	0.6814	0.7496	1.1025	0.78	0.763	0.7968	0.7554	0.6309	0.6344
1.00765	0.154541	0.692358	0.124555		31	0.9944	1.0116	0.9862	0.8617	0.9416	1.4754	0.9572	0.9431	1.0488	0.9456	0.9368	0.9894		31	0.5558	0.6009	0.6992	0.6308	0.7092	1.016	0.7517	0.7215	0.7592	0.7052	0.5907	0.5681
0.997608	0.151853	0.623817	0.118069		32	0.9922	1.0033	0.9812	0.8501	0.9343	1.4588	0.9508	0.9339	1.0185	0.9249	0.9494	0.9739		32	0.5025	0.5391	0.6328	0.5728	0.6378	0.9225	0.6922	0.6474	0.6857	0.6476	0.5167	0.4887
0.997258	0.152188	0.55585	0.102769		33	0.9956	1.0055	0.983	0.8532	0.9399	1.4598	0.9495	0.9361	1.0165	0.9289	0.9284	0.9707		33	0.4574	0.4914	0.5689	0.5085	0.5603	0.815	0.6191	0.5764	0.6121	0.5715	0.4558	0.4338
1.00057	0.149472	0.494258	0.083603		34	0.9955	1.0119	0.9918	0.8577	0.9437	1.4513	0.9584	0.9351	1.0268	0.9066	0.9487	0.9793		34	0.4203	0.445	0.5073	0.4597	0.4871	0.7035	0.5451	0.4985	0.5464	0.5178	0.4107	0.3897
1.00286	0.150127	0.444783	0.067639		35	1.0007	1.0146	0.993	0.8612	0.9448	1.4521	0.9641	0.9372	1.0402	0.9069	0.9259	0.9936		35	0.392	0.4126	0.4549	0.4105	0.4264	0.6133	0.4883	0.4453	0.4883	0.4709	0.3729	0.362
0.999817	0.144355	0.4103	0.0553687		36	1.0013	1.0186	0.9993	0.8509	0.9414	1.4273	0.9641	0.9367	1.0369	0.9034	0.9338	0.9841		36	0.3767	0.391	0.4174	0.3766	0.389	0.5446	0.4413	0.4024	0.4562	0.4389	0.346	0.3435
1.00358	0.141652	0.371875	0.0471957		37	1.0011	1.02	1.0026	0.8522	0.9505	1.4219	0.9671	0.9438	1.0456	0.9196	0.9271	0.9915		37	0.3541	0.365	0.3696	0.3271	0.3493	0.4991	0.3896	0.3634	0.4016	0.3882	0.3266	0.3289
1.00376	0.137306	0.348658	0.041436		38	0.9996	1.0241	1.0013	0.8592	0.9425	1.4088	0.9644	0.9411	1.0515	0.9284	0.9363	0.9879		38	0.3384	0.3484	0.3416	0.3052	0.3267	0.464	0.3543	0.3447	0.37	0.3611	0.3077	0.3218
1.00105	0.129423	0.333125	0.0363507		39	0.9993	1.019	1.0011	0.8574	0.9448	1.3789	0.9703	0.9477	1.0486	0.9104	0.947	0.9881		39	0.329	0.3398	0.3322	0.2983	0.3096	0.433	0.3308	0.322	0.3547	0.3414	0.2912	0.3155
1.00561	0.138126	0.327867	0.0353162		40	1.0025	1.0217	1.0099	0.8644	0.9445	1.4147	0.9764	0.9426	1.0429	0.922	0.9338	0.9919		40	0.3275	0.3337	0.33	0.2945	0.3032	0.4237	0.3213	0.3135	0.3526	0.3356	0.2886	0.3102
1.00045	0.132462	0.328892	0.0348281		41	0.9984	1.0217	1.0054	0.8485	0.9414	1.386	0.9684	0.9457	1.0497	0.9271	0.9281	0.985		41	0.3321	0.3371	0.3345	0.2994	0.3031	0.4236	0.3218	0.3135	0.3489	0.3328	0.2867	0.3132
1.00374	0.135885	0.329325	0.0343484		42	1	1.0209	0.9981	0.8492	0.9482	1.4009	0.971	0.9464	1.0545	0.9279	0.9307	0.9971		42	0.3301	0.3386	0.3333	0.2957	0.3052	0.4215	0.3223	0.3146	0.3511	0.3348	0.2875	0.3172
1.001	0.128916	0.334175	0.0346156		43	0.9978	1.023	1.0077	0.8562	0.9475	1.3786	0.9733	0.9502	1.0388	0.9216	0.9342	0.9831		43	0.3362	0.3456	0.3389	0.3013	0.3086	0.4249	0.3271	0.3191	0.3578	0.3419	0.2905	0.3182
0.999058	0.12684	0.334833	0.0319064		44	0.996	1.0197	1.0082	0.8564	0.9472	1.3707	0.9651	0.9475	1.0408	0.9213	0.9455	0.9703		44	0.3366	0.3449	0.3425	0.3022	0.3104	0.4185	0.3249	0.3158	0.3546	0.3458	0.2996	0.3222
0.999325	0.125435	0.334183	0.0334499		45	0.9987	1.0191	0.9989	0.8572	0.9504	1.3631	0.9721	0.9494	1.0545	0.9302	0.9203	0.978		45	0.3362	0.344	0.3394	0.2988	0.3087	0.4202	0.3243	0.3185	0.3597	0.3462	0.2954	0.3188
0.998442	0.117993	0.335192	0.0289502		46	0.9991	1.0162	1.0176	0.8555	0.953	1.3349	0.9771	0.9505	1.0478	0.9271	0.9194	0.9831		46	0.3359	0.346	0.3422	0.3038	0.3122	0.4043	0.3274	0.3264	0.3599	0.3488	0.2951	0.3203
0.9921	0.0863782	0.338175	0.0238912		47	0.9901	1.0142	1.0239	0.8686	0.9609	1.224	0.9697	0.9573	1.0429	0.925	0.9537	0.9749		47	0.3411	0.3522	0.3501	0.3129	0.3191	0.3768	0.3326	0.3292	0.3691	0.3567	0.2961	0.3222
0.984133	0.0806424	0.3353	0.0223976		48	0.9917	1.0164	1.0127	0.8648	0.9626	1.1867	0.9756	0.9596	1.0381	0.9432	0.8933	0.9649		48	0.3395	0.3535	0.3496	0.3094	0.3196	0.3669	0.3287	0.326	0.3637	0.3517	0.2953	0.3197
0.988417	0.0782933	0.336317	0.0214267		49	0.9895	1.0177	1.0148	0.8615	0.9539	1.1832	0.9764	0.9538	1.0581	0.9402	0.9549	0.957		49	0.3383	0.3528	0.3512	0.3124	0.3186	0.3641	0.332	0.3276	0.366	0.3546	0.3019	0.3163
0.983825	0.0746197	0.347425	0.0200556		50	0.9911	1.0095	1.0113	0.8554	0.9595	1.158	0.9732	0.9618	1.0551	0.9425	0.9139	0.9746		50	0.3397	0.3565	0.3585	0.3157	0.3347	0.3803	0.349	0.3409	0.3775	0.3607	0.3251	0.3305
0.98595	0.0655481	0.453725	0.0443991		51	0.9862	1.0166	1.0177	0.8642	0.9627	1.1337	0.982	0.9698	1.0462	0.9477	0.9367	0.9679		51	0.3701	0.4156	0.4475	0.3958	0.4799	0.5252	0.5047	0.4735	0.479	0.4548	0.4355	0.4631
0.9859	0.0632183	0.612058	0.087292		52	0.9881	1.0244	1.02	0.8699	0.9627	1.0968	0.9781	0.9691	1.0784	0.9604	0.9139	0.969		52	0.4314	0.5195	0.602	0.5274	0.684	0.7185	0.7153	0.6663	0.6531	0.6196	0.5628	0.6448
0.989983	0.0620151	0.743342	0.10407		53	0.9937	1.0149	1.0198	0.8685	0.974	1.0967	0.9793	0.9624	1.0929	0.9537	0.9585	0.9654		53	0.5144	0.6309	0.7568	0.6562	0.8209	0.8581	0.8476	0.805	0.8108	0.7693	0.6678	0.7823
0.9893	0.0608581	0.815717	0.0952152		54	0.9924	1.0235	1.0183	0.8661	0.9732	1.0843	0.98	0.9663	1.0865	0.993	0.9378	0.9502		54	0.5923	0.7298	0.8505	0.7485	0.8715	0.8825	0.8977	0.8657	0.9132	0.8677	0.7309	0.8383
0.990833	0.0689757	0.849517	0.0854074		55	0.9877	1.0225	1.0312	0.8695	0.9729	1.0356	0.9902	0.961	1.154	0.9817	0.9307	0.953		55	0.6638	0.791	0.9085	0.7924	0.8811	0.8791	0.9115	0.8813	0.9831	0.9001	0.7577	0.8446
0.996825	0.073648	0.864375	0.0778956		56	0.9876	1.0226	1.0332	0.8659	0.9758	1.0534	0.9897	0.9644	1.1766	0.9729	0.9665	0.9533		56	0.7107	0.8332	0.9234	0.7991	0.88	0.8641	0.9159	0.8848	1.0087	0.9155	0.777	0.8601
1.00242	0.0854416	0.877258	0.0819143		57	0.9864	1.0264	1.042	0.8737	0.981	1.0773	0.9818	0.9638	1.2196	0.9775	0.9461	0.9535		57	0.7437	0.8534	0.9322	0.813	0.8769	0.8989	0.9133	0.8729	1.0598	0.9297	0.7776	0.8557
1.01562	0.103247	0.882867	0.0840574		58	0.9924	1.0328	1.0513	0.8792	0.9777	1.0988	0.9888	0.9652	1.2941	0.9896	0.9694	0.9481		58	0.759	0.8582	0.9372	0.8166	0.8715	0.9297	0.9018	0.8757	1.0817	0.9275	0.7887	0.8468
1.02017	0.1213	0.891967	0.0935761		59	0.9915	1.0324	1.0457	0.8867	0.964	1.1423	0.9792	0.9588	1.3504	0.9769	0.9555	0.9586		59	0.777	0.8756	0.9412	0.8259	0.874	0.9541	0.8949	0.874	1.1302	0.9214	0.7798	0.8555
1.02553	0.139658	0.890592	0.0987361		60	0.9939	1.0291	1.0367	0.8817	0.97	1.1615	0.9767	0.9594	1.4147	0.977	0.9496	0.9561		60	0.7839	0.8725	0.9326	0.8254	0.8621	0.962	0.8812	0.8671	1.1533	0.9177	0.7857	0.8436
1.03058	0.154109	0.8922	0.105849		61	0.9946	1.024	1.0411	0.8798	0.9701	1.2066	0.971	0.9664	1.4507	0.9746	0.9356	0.9525		61	0.7858	0.8724	0.9317	0.8189	0.8639	0.9897	0.8723	0.8771	1.1727	0.8968	0.7788	0.8463
1.03429	0.169822	0.8914	0.116309		62	0.9973	1.0265	1.0347	0.8855	0.9639	1.2232	0.9672	0.9621	1.5046	0.9436	0.9422	0.9607		62	0.7875	0.867	0.9223	0.8223	0.8574	0.9838	0.8686	0.8623	1.2166	0.8847	0.7785	0.8458
1.03739	0.177656	0.886742	0.118491		63	0.9965	1.0237	1.0289	0.8805	0.9664	1.2369	0.9703	0.9665	1.5295	0.9353	0.9374	0.9768		63	0.789	0.8629	0.9054	0.8122	0.8495	1.0082	0.8603	0.8645	1.2099	0.8728	0.768	0.8382
1.03974	0.19157	0.87665	0.123213		64	0.9968	1.0254	1.0217	0.8649	0.9699	1.292	0.9722	0.9692	1.5501	0.9192	0.9281	0.9674		64	0.7777	0.8484	0.8913	0.7996	0.842	1.0312	0.8502	0.8443	1.2016	0.8504	0.7551	0.828
1.03672	0.183741	0.873217	0.119742		65	0.9966	1.0231	1.0233	0.8648	0.9641	1.3087	0.9716	0.9714	1.5061	0.9067	0.9357	0.9685		65	0.7738	0.8481	0.8869	0.7889	0.8422	1.0442	0.8473	0.8442	1.1743	0.8445	0.7499	0.8343
1.03246	0.179767	0.866333	0.113145		66	0.9951	1.0209	1.0142	0.8379	0.9632	1.3473	0.9689	0.9689	1.4524	0.915	0.9312	0.9745		66	0.7668	0.8421	0.8804	0.7782	0.8363	1.0614	0.8438	0.8385	1.1278	0.8344	0.7613	0.825
1.02461	0.174821	0.856133	0.113313		67	0.9823	1.0181	1.0117	0.8278	0.9623	1.3864	0.9758	0.9742	1.3774	0.8955	0.9202	0.9636		67	0.7638	0.8304	0.8641	0.755	0.8301	1.079	0.8441	0.8341	1.0896	0.8258	0.7376	0.82
1.01939	0.177067	0.849083	0.114802		68	0.9805	1.0179	1.0062	0.8018	0.9609	1.4219	0.9715	0.978	1.3284	0.8891	0.9186	0.9579		68	0.7516	0.8225	0.8564	0.7386	0.8227	1.117	0.8377	0.8323	1.0395	0.8103	0.7458	0.8146
1.01667	0.18571	0.840008	0.123029		69	0.9723	1.0092	1.003	0.7736	0.9564	1.4673	0.9761	0.9717	1.2986	0.891	0.9203	0.9606		69	0.7346	0.8074	0.8494	0.7124	0.815	1.1335	0.8336	0.8263	1.0278	0.8105	0.7229	0.8067
1.01421	0.190705	0.834717	0.129212		70	0.9673	1.0058	1.0024	0.7489	0.9563	1.4865	0.9708	0.9786	1.2795	0.8825	0.928	0.9639		70	0.7271	0.8038	0.8376	0.687	0.8102	1.1539	0.8217	0.833	1.0105	0.808	0.7149	0.8089
1.01318	0.20095	0.829342	0.13594		71	0.9684	1.0035	1.0052	0.7421	0.9493	1.5412	0.9635	0.9918	1.2416	0.876	0.9241	0.9515		71	0.7194	0.8003	0.8394	0.6775	0.8065	1.1815	0.82	0.8207	0.9902	0.7912	0.7114	0.794
1.01252	0.210022	0.82405	0.141146		72	0.9547	1.0096	0.9932	0.7264	0.9449	1.5648	0.9604	0.9911	1.2528	0.8827	0.9253	0.9443		72	0.7143	0.7963	0.8324	0.6691	0.7945	1.1989	0.8137	0.824	0.9748	0.786	0.7022	0.7824
