# Supplementary material for: Hypoxia controls plasma membrane targeting of polarity proteins by dynamic turnover of PI4P and PI(4,5)P2
Source: eLife. 2022 Jun 9;11:e79582. doi: 10.7554/eLife.79582 (PMC9242647; doi:10.7554/eLife.79582)
Supplement: Supplementary file 1. [file elife-79582-supp1.xlsx]

## Sheet: Sheet1
Candidate RNAi screen on regulators controlling hypoxia-induced acute and reversible loss of PM Lgl
RNAi Stock （BL #)	Gene	Cell Morphology	Diffusion under Hypoxia	Recovery during Reoxygenation
33719	Plc21C	-	-	-
55602	Pis	-	Accelerated	Delayed
38242	PI4KIIIα	-	Accelerated	Delayed
44420	Synj	-	-	-
44523	rdgβ	-	-	-
41701	INPP5E	-	-	-
42759	CG5026	-	-	-
33643	Pten
36810	Pi3K21B	-	-	-
35257	fwd	-	-	-
31552	mtm	-	-	-
35660	PIP4K	-	-	-
34037	INPP5E	Smaller	Accelerated	-
38341	CG3632	-	-	-
38339	mtm	-	-	-
35338	PIP4K	-	-	-
38291	FIG4	-	-	-
38309	CG5026	-	-	-
35278	Pi4KIIα	-	-	-
31113	norpA	-	-	-
27715	sktl	-	-	Delayed
29396	fwd	-	-	-
28316	CG6707	-	-	-
34378	Synj	-	-	-
29383	Pis	-	-	-
32385	sl	-	-	-
29411	CG42271	-	-	-
31270	Plc21C	-	-	-
35798	Pi3K92E	-	-	-
33384	Pi3K59F	-	-	-
35604	sl	-	-	-
34723	CG9784	-	-	-
34621	Pi3K68D	-	-	-
34722	Ocrl	-	-	-
35198	sktl	-	-	-
35256	PI4KIIIα	-	Accelerated	Delayed
25841	Pten	Larger	Accelerated	-
35793	CG33981	-	-	-
32438	Plc21C	-	-	-
28796	rdgB	-	-	-
25864	CG3530	-	-	-
27489	Synj	-	-	-
31252	Pi3K68D	-	-	-
25967	Pten	Larger	Acclelerated	-
27690	Pi3K92E	Smaller	Delayed	-
31197	norpA	-	-	-
31187	fwd	-	-	-
31269	Plc21C	-	-	-
32906	sl	-	-	-
38340	CG3530	-	-	-
57020	CG5026	-	-	-
65891	PIP4K	-	-	-
56013	Sac1	-	-	-
64011	Pi3K59F	-	-	-
35265	Pi3K68D	-	-	-
62855	PIP5K59B	-	-	-
61182	Pi3K92E	-	-	-
57298	mtm	-	-	-
38991	Pi3K21B	-	-	-
36056	Pi3K59F	-	-	-
58063	FIG4	-	-	-
